# Supplementary material for: Cells use molecular working memory to navigate in changing chemoattractant fields
Source: eLife. 2022 Jun 6;11:e76825. doi: 10.7554/eLife.76825 (PMC9282860; doi:10.7554/eLife.76825)
Supplement: Figure 2—figure supplement 1—source data 1. [file elife-76825-fig2-figsupp1-data1.xlsx]

## Sheet: Supplement 1C
	Bin 0	Bin 1	Bin 2	Bin 3	Bin 4	Bin 5	Bin 6	Bin 7	Bin 8	Bin 9	Bin 10	Bin 11	Bin 12	Bin 13	Bin 14	Bin 15	Bin 16	Bin 17	Bin 18	Bin 19
Cell 0	0.624299	0.617796	0.604584	0.602841	0.612811	0.630517	0.679374	0.721246	0.763563	0.79429	0.771871	0.721915	0.660529	0.594879	0.541251	0.508723	0.518757	0.548387	0.570688	0.604908
Cell 1	0.44079	0.470423	0.561215	0.656949	0.730384	0.754767	0.743216	0.739959	0.744881	0.749784	0.728969	0.673668	0.6681	0.644117	0.601962	0.563062	0.510629	0.478608	0.460359	0.422868
Cell 2	0.73696	0.716539	0.700756	0.698311	0.71471	0.754874	0.814748	0.890227	0.9605	0.998763	0.976601	0.940197	0.900191	0.848676	0.788252	0.746863	0.758891	0.771755	0.777318	0.77856
Cell 3	0.708962	0.77858	0.822538	0.817825	0.802348	0.780209	0.744704	0.761847	0.807272	0.867178	0.915467	0.926635	0.918695	0.837271	0.732266	0.641002	0.586673	0.583211	0.567798	0.57578
Cell 4	0.703428	0.687307	0.673568	0.66841	0.677257	0.696341	0.727449	0.75834	0.794385	0.818709	0.791177	0.764438	0.731952	0.724571	0.706236	0.688892	0.711108	0.723166	0.737571	0.728775
Cell 5	0.757275	0.762053	0.762689	0.767819	0.773135	0.775651	0.775927	0.78016	0.789396	0.783475	0.781971	0.77539	0.771775	0.767697	0.759672	0.760082	0.755633	0.756845	0.759147	0.754195
Cell 6	0.532458	0.529528	0.524244	0.515353	0.514597	0.535084	0.562925	0.595019	0.625972	0.647873	0.666998	0.679201	0.669608	0.634074	0.594904	0.571072	0.558485	0.551343	0.546825	0.557173
Cell 7	0.455431	0.499972	0.52746	0.543565	0.533591	0.532943	0.53618	0.540257	0.546426	0.552912	0.573435	0.575498	0.582907	0.5856	0.546724	0.4958	0.472974	0.477669	0.45487	0.411886
Cell 8	0.674379	0.666263	0.640332	0.620319	0.602085	0.585845	0.583952	0.604606	0.651876	0.689235	0.698476	0.683542	0.66966	0.649772	0.596998	0.559179	0.569461	0.616246	0.647312	0.665744
Cell 9	0.639409	0.641224	0.645125	0.654318	0.669852	0.681613	0.685642	0.695302	0.706921	0.698014	0.684721	0.665583	0.654763	0.639163	0.617233	0.611346	0.614282	0.62582	0.633528	0.640786
Cell 10	0.745352	0.738928	0.737207	0.739976	0.748037	0.762165	0.779179	0.804245	0.831995	0.850206	0.856644	0.860233	0.855268	0.833507	0.809159	0.792624	0.78096	0.767803	0.759581	0.760581
Cell 11	0.553525	0.491866	0.460917	0.464011	0.478141	0.526879	0.571345	0.628573	0.685645	0.70713	0.714083	0.733173	0.768585	0.761885	0.706894	0.715762	0.736445	0.705825	0.674399	0.662391
Cell 12	0.553168	0.544295	0.559499	0.568682	0.584308	0.601777	0.611766	0.616056	0.628622	0.628851	0.629082	0.631772	0.641178	0.648017	0.648287	0.636472	0.611474	0.608257	0.604925	0.602749
Cell 13	0.481897	0.467729	0.478407	0.502349	0.531052	0.547792	0.560273	0.576504	0.591296	0.597187	0.577649	0.552159	0.545193	0.548125	0.540062	0.533758	0.528516	0.52172	0.51997	0.504084
Cell 14	0.658008	0.664074	0.653658	0.64873	0.629992	0.607991	0.590806	0.588393	0.611241	0.629045	0.634142	0.65111	0.635967	0.593923	0.537113	0.525129	0.553653	0.554955	0.574736	0.61663
Cell 15	0.547559	0.543749	0.567088	0.595797	0.60335	0.617984	0.637973	0.670802	0.685179	0.690055	0.688848	0.664579	0.622754	0.558433	0.507735	0.479223	0.455939	0.454468	0.459151	0.491753
Cell 16	0.58566	0.524202	0.492701	0.474285	0.476637	0.491013	0.525418	0.575341	0.628931	0.655594	0.643141	0.626942	0.632522	0.642925	0.639262	0.658353	0.689726	0.709353	0.71937	0.709109
Cell 17	0.749688	0.753292	0.754486	0.76216	0.779537	0.789998	0.792022	0.801455	0.821711	0.831626	0.833171	0.836636	0.845946	0.858043	0.844201	0.822458	0.806741	0.786573	0.77199	0.748054
Cell 18	0.578393	0.585763	0.601482	0.625554	0.632553	0.606302	0.584108	0.596545	0.61799	0.616143	0.615609	0.633662	0.645393	0.627442	0.598104	0.580323	0.56748	0.556467	0.547772	0.542774
Cell 19	0.691401	0.694422	0.70252	0.709356	0.715304	0.724707	0.72619	0.734481	0.754968	0.766167	0.773738	0.78529	0.800316	0.795774	0.767197	0.748373	0.729439	0.710688	0.693687	0.683777

## Sheet: Supplement 1D
	Bin 0	Bin 1	Bin 2	Bin 3	Bin 4	Bin 5	Bin 6	Bin 7	Bin 8	Bin 9	Bin 10	Bin 11	Bin 12	Bin 13	Bin 14	Bin 15	Bin 16	Bin 17	Bin 18	Bin 19			Bin 0	Bin 1	Bin 2	Bin 3	Bin 4	Bin 5	Bin 6	Bin 7	Bin 8	Bin 9	Bin 10	Bin 11	Bin 12	Bin 13	Bin 14	Bin 15	Bin 16	Bin 17	Bin 18	Bin 19
0	0.468764	0.232436	0.395493	0.300276	0.29281	0.292616	0.400738	0.498993	0.91337	0.991664	0.922304	0.405432	0.550678	0.409921	0.525324	0.96183	0.771994	0.240259	0.236282	0.600199		0	0.97415	0.643078	0.494652	0.596992	0.463301	0.633646	0.66817	0.399715	0.661624	1.02551	1.02988	0.970124	0.596067	0.572366	0.612601	0.437602	0.753831	0.366674	0.466296	0.703748
1	0.489526	0.268727	0.38257	0.383473	0.346464	0.277444	0.352588	0.482299	0.857087	0.922249	0.858599	0.50147	0.506274	0.395051	0.483826	0.961697	1.10873	0.328142	0.217596	0.667559		1	0.735451	0.637619	0.631329	0.544774	0.46925	0.640289	0.577717	0.545236	0.397728	0.969636	0.795918	0.93994	0.660451	0.539645	0.575119	0.427594	0.722614	0.443743	0.429657	0.451929
2	0.348619	0.200861	0.405964	0.339917	0.369836	0.259462	0.371172	0.438305	0.941577	0.927356	0.804228	0.50669	0.492234	0.282255	0.546702	0.95349	0.258799	0.727468	0.44976	0.227254		2	0.681538	0.682472	0.620862	0.590189	0.462455	0.654308	0.621839	0.529455	0.699561	0.749335	0.890865	0.815201	0.594041	0.542446	0.574033	0.390143	0.637438	0.363446	0.402288	0.474488
3	0.205361	0.319493	0.373348	0.259503	0.203951	0.36072	0.270111	0.413414	0.418971	0.68847	0.869064	0.843247	0.534657	0.379879	0.687637	0.868047	0.266829	0.554473	0.451926	0.240701		3	0.626712	0.720378	0.642172	0.514152	0.474248	0.633811	0.627395	0.457043	0.641169	0.794586	0.795725	0.822601	0.537251	0.58409	0.593194	0.445065	0.714088	0.40446	0.449149	0.377908
4	0.223521	0.379493	0.40832	0.210334	0.259089	0.309045	0.307656	0.413465	0.480747	0.574432	0.891965	0.730187	0.537464	0.298405	0.645517	0.55542	0.358925	0.451333	0.533386	0.403598		4	0.772167	0.687191	0.650956	0.480231	0.476138	0.651246	0.600452	0.482417	0.691166	0.726495	0.823338	0.861896	0.536251	0.596859	0.585913	0.574866	0.828581	0.534034	0.607514	0.473699
5	0.296907	0.38085	0.480407	0.499652	0.406703	0.407699	0.311822	0.422094	0.652742	0.723457	0.913712	0.805307	0.599446	0.32436	0.560409	0.349704	0.539493	0.563605	0.430913	0.67659		5	0.846907	0.767334	0.758996	0.536852	0.543733	0.614842	0.620499	0.508239	0.72977	0.859151	0.847651	0.837376	0.64886	0.676541	0.654105	0.648209	0.878102	0.605421	0.700603	0.593287
6	0.561751	0.489408	0.315353	0.606929	0.653955	0.37008	0.427851	0.682007	0.761037	0.806696	0.793243	0.620452	0.602586	0.582049	0.44567	0.423591	0.582247	0.551348	0.411565	0.719701		6	0.869184	0.811597	0.718428	0.576669	0.576514	0.652576	0.695639	0.608418	0.897234	0.890966	0.893373	0.897914	0.730565	0.767579	0.700712	0.677332	0.824012	0.659796	0.703461	0.690534
7	0.658634	0.452975	0.520466	0.550607	0.636486	0.393574	0.57447	0.682915	0.710818	0.769122	0.724992	0.66053	0.695952	0.642082	0.510456	0.52708	0.573234	0.556218	0.467842	0.639318		7	0.884128	0.80611	0.720549	0.759227	0.559385	0.697601	0.743682	0.657597	0.813999	0.937893	1.0369	0.984212	0.722071	0.79422	0.64675	0.719492	0.804881	0.761885	0.625032	0.721719
8	0.652494	0.599387	0.581503	0.570947	0.567201	0.355444	0.564841	0.678467	0.746003	0.770067	0.693474	0.673753	0.661488	0.567375	0.592416	0.522576	0.543358	0.550397	0.578112	0.623712		8	0.886053	0.887247	0.728856	0.741072	0.577159	0.761798	0.816363	0.654113	0.900689	1.01514	1.06928	1.01522	0.753522	0.793261	0.680306	0.713593	0.861423	0.498855	0.782683	0.583908
9	0.706193	0.62399	0.485258	0.650757	0.662371	0.436345	0.633011	0.671053	0.775146	0.72782	0.785303	0.700479	0.645404	0.549657	0.514264	0.520461	0.595323	0.601007	0.602779	0.640996		9	0.717975	0.789467	0.780583	0.68308	0.90399	0.802247	0.801966	0.636807	0.91325	1.02629	1.11882	1.07822	0.665063	0.782594	0.794433	0.637836	0.690756	0.886037	0.768576	0.747756
10	0.553085	0.675664	0.530476	0.690277	0.691674	0.465132	0.648459	0.640493	0.804688	0.778537	0.761823	0.681245	0.605371	0.561333	0.543975	0.587175	0.437187	0.57624	0.573118	0.610218		10	0.636197	0.75633	0.741025	0.68822	0.916011	0.798034	0.861857	0.606422	0.877857	1.04439	1.03522	1.01464	0.635386	0.720652	0.829066	0.568549	0.68461	0.968932	1.00348	0.766452
11	0.484044	0.618124	0.547708	0.60747	0.660853	0.511546	0.77335	0.653737	0.779711	0.785694	0.715067	0.636118	0.552108	0.518175	0.56466	0.545577	0.501129	0.658955	0.800391	0.668154		11	0.708615	0.769036	0.702334	0.583694	0.830643	0.816434	0.691459	0.594504	0.990511	1.03451	1.09489	1.03104	0.651045	0.88092	0.876824	0.564082	0.629614	0.98467	0.927593	0.80346
12	0.47312	0.587134	0.549423	0.608942	0.73005	0.409789	0.686177	0.727127	0.735508	0.74724	0.665811	0.658083	0.482641	0.549588	0.518824	0.524917	0.68536	0.704748	0.747458	0.414572		12	0.649409	0.733604	0.655396	0.670571	0.811596	0.801464	0.588277	0.999744	0.81611	1.30848	1.00045	1.09445	0.732279	0.754221	0.739484	0.602101	0.648267	0.79278	0.938021	0.81278
13	0.530679	0.614194	0.509782	0.62271	0.581614	0.506064	0.769817	0.836925	0.774918	0.814004	0.750309	0.724933	0.505258	0.462034	0.517922	0.505551	0.769001	0.802185	0.679487	0.402757		13	0.682037	0.688006	0.651421	0.714876	0.841543	0.727296	0.830497	1.06312	1.14581	1.41024	1.22163	1.09862	0.780024	0.973066	1.05548	0.644576	0.696776	0.81604	0.851171	0.708133
14	0.552474	0.550467	0.58797	0.617445	0.695639	0.357713	0.63569	0.728429	0.818258	0.806879	0.724623	0.801586	0.609465	0.513705	0.481234	0.498305	0.756872	0.422657	0.738143	0.407555		14	0.601022	0.680936	0.65533	0.688318	1.01911	0.75074	0.739199	0.616858	0.968971	1.20839	1.08859	1.04315	0.735322	0.870465	0.98589	0.682903	0.621154	0.736872	0.790753	0.781736
15	0.576713	0.63956	0.55176	0.626961	0.649439	0.469942	0.675517	0.755085	0.775519	0.774056	0.727772	0.841283	0.68129	0.496005	0.526855	0.483831	0.689645	0.908031	0.647146	0.494557		15	0.643053	0.674142	0.646282	0.723529	0.985143	0.868278	0.763835	0.809685	1.06319	1.17526	1.15113	1.03838	0.756228	0.839032	1.00133	0.739023	0.76026	0.685488	0.869246	0.796812
16	0.49795	0.599682	0.553106	0.674028	0.632511	0.324767	0.645329	0.607972	0.81394	0.760529	0.822463	0.89635	0.694353	0.529901	0.458893	0.434294	0.648954	0.765389	0.81761	0.477279		16	0.621482	0.662802	0.687771	0.753304	0.88384	0.733112	0.689677	1.01987	1.06221	1.34441	0.930321	1.18132	0.700408	0.90683	0.862702	1.06842	0.765054	0.853129	0.820944	0.707338
17	0.554859	0.498121	0.623415	0.629755	0.676247	0.303632	0.574786	0.582395	0.797209	0.730038	0.736541	0.834411	0.657639	0.540869	0.454092	0.463144	0.659311	0.658877	0.784974	0.411015		17	0.599437	0.631535	0.715079	0.697114	0.798268	0.795166	0.872911	0.735127	0.831754	0.987173	1.23435	1.12165	0.847031	0.713672	0.88677	0.952188	1.2785	1.14121	0.915095	0.725983
18	0.554731	0.638304	0.52525	0.649856	0.624331	0.302285	0.625789	0.611447	0.787673	0.730231	0.788284	0.879687	0.642682	0.516305	0.471768	0.475542	0.680168	0.648781	0.771202	0.487944		18	0.735315	0.655792	0.539045	0.679982	0.729267	0.830402	1.28644	0.793217	0.967452	1.08116	1.25849	1.13987	0.767278	0.987919	0.822704	0.912788	1.16207	1.18727	0.912878	0.781744
19	0.561638	0.659384	0.535094	0.761398	0.627028	0.272304	0.592799	0.532917	0.77361	0.746203	0.80728	0.929042	0.766869	0.508734	0.458533	0.42193	0.541132	0.711018	0.773061	0.493249		19	0.745561	0.642218	0.553094	0.572767	0.781634	0.816691	1.11232	0.700861	0.923393	1.01505	1.19469	1.06567	0.741881	1.04146	0.813044	0.897316	1.21845	1.41169	0.97753	0.738549
20	0.603333	0.646173	0.399767	0.75938	0.461456	0.353728	0.598112	0.597962	0.721263	0.767143	0.827553	0.896559	0.679796	0.493333	0.394643	0.451492	0.538959	0.657937	0.67844	0.618622		20	0.746576	0.613001	0.54723	0.615998	0.698313	0.752537	0.86862	0.62384	1.04874	0.891108	1.38121	1.06332	0.765688	0.942809	0.811984	0.922726	1.13818	1.11055	0.896463	0.879032
21	0.578712	0.606545	0.392773	0.652799	0.315522	0.412583	0.680807	0.665815	0.80009	0.794195	0.810762	0.97091	0.648757	0.541461	0.429176	0.384172	0.518635	0.684314	0.651755	0.76899		21	0.739709	0.64074	0.526152	0.529886	0.845894	0.795056	0.975513	0.831864	0.929228	0.995032	1.34168	1.18083	0.77331	0.900854	0.840866	0.78127	1.05073	1.00032	0.933871	0.769924
22	0.623466	0.644443	0.375941	0.6422	0.32031	0.386333	0.643865	0.676848	0.812839	0.776109	0.864224	0.867718	0.766792	0.500471	0.40545	0.389948	0.426024	0.615683	0.684382	0.7481		22	0.727644	0.63976	0.495941	0.676934	0.830433	0.951273	0.801837	0.96414	1.01839	1.1779	1.22258	1.09675	0.802418	0.807249	0.889587	0.664089	0.805996	0.862263	0.883379	1.0213
23	0.64862	0.687433	0.418618	0.62327	0.33817	0.399414	0.635833	0.732656	0.79433	0.791804	0.822134	0.850426	0.750092	0.524292	0.420132	0.3738	0.472732	0.618199	0.616782	0.697549		23	0.863481	0.627355	0.500362	0.624938	0.715256	0.814766	0.966264	0.938592	1.05002	1.27564	1.31333	1.24129	0.816651	0.693408	0.946142	0.71567	0.69057	0.950338	1.18435	0.992084
24	0.644524	0.694952	0.39935	0.579501	0.343123	0.432628	0.638832	0.756485	0.801157	0.850239	0.83014	0.939395	0.630998	0.435489	0.43697	0.382055	0.412554	0.672538	0.625812	0.727858		24	0.889434	0.6133	0.433942	0.545769	0.680467	0.705449	0.839468	1.03214	0.945914	1.12896	1.48937	1.09291	0.828854	0.72076	0.951377	0.675506	0.638628	0.823952	0.928133	1.0326
25	0.789298	0.640935	0.379683	0.557914	0.366128	0.552555	0.74339	0.741763	0.782255	0.796295	0.876507	0.972444	0.699832	0.500196	0.437336	0.379654	0.417075	0.6546	0.649184	0.700462		25	0.954985	0.612163	0.460302	0.553575	0.68515	0.721977	0.774671	1.05542	1.00582	1.19951	1.29699	1.08331	0.90398	0.712715	0.76577	0.984139	0.679245	0.745773	0.837975	1.01451
26	0.744217	0.662342	0.444443	0.53828	0.47412	0.649912	0.759311	0.682532	0.799651	0.872659	0.919844	0.945193	0.687057	0.451081	0.405957	0.372724	0.372774	0.600859	0.713765	0.635769		26	0.807239	0.571291	0.451061	0.540129	0.764051	0.760748	0.765265	1.17835	1.12636	1.06161	1.34103	1.10678	0.815436	0.729807	0.859429	0.958895	0.698041	0.784936	0.806999	0.834228
27	0.708223	0.662873	0.529721	0.551087	0.433304	0.606057	0.796083	0.66848	0.752932	0.872846	0.792459	0.951155	0.745422	0.484587	0.405499	0.373297	0.407614	0.631896	0.653268	0.667358		27	0.793277	0.571038	0.48891	0.577293	0.719037	0.807105	0.953829	1.21186	1.06414	1.26881	1.23354	1.0875	0.862073	0.676971	0.741029	0.951664	0.68083	0.785528	0.701606	0.914754
28	0.642535	0.687308	0.393604	0.574062	0.431903	0.626774	0.726054	0.75972	0.730066	0.873652	0.873087	0.959658	0.703741	0.462782	0.409673	0.366104	0.40216	0.552521	0.604954	0.664928		28	0.750077	0.572602	0.599042	0.643199	0.682488	0.802267	0.912558	1.2436	1.14151	1.10004	1.22202	0.986748	0.994218	0.796018	0.735887	0.847727	0.690378	0.760736	0.668018	0.800769
29	0.679059	0.682611	0.459042	0.562526	0.458712	0.609948	0.699381	0.817561	0.845905	0.815848	0.819632	0.821903	0.75444	0.466872	0.412432	0.373609	0.469746	0.498275	0.606194	0.661824		29	0.738141	0.552336	0.667767	0.610352	0.870739	0.75132	0.859923	0.860586	1.12463	1.04286	1.16932	0.968383	0.81827	0.793323	0.712196	0.810709	0.713188	0.870383	0.689242	0.764613
30	0.686347	0.717205	0.480968	0.518428	0.465308	0.689313	0.752265	0.718974	0.738085	0.907702	0.735842	0.882764	0.673099	0.466715	0.413526	0.366478	0.525521	0.605057	0.667167	0.634371		30	0.80375	0.567291	0.555666	0.608978	0.944422	0.675376	0.869098	0.889249	1.06876	1.06637	1.11416	0.875774	0.979032	0.760485	0.866021	0.753865	0.685415	0.832943	0.633273	0.72188
31	0.754363	0.694612	0.572178	0.517449	0.436615	0.639114	0.644344	0.689456	0.840684	0.879086	0.795427	0.844838	0.633847	0.426268	0.391749	0.350671	0.40884	0.585247	0.593693	0.659261		31	0.79339	0.564554	0.743084	0.605492	0.784049	0.850176	0.827851	1.01567	0.990802	1.02407	1.04368	0.915891	0.84462	0.893908	0.781962	0.771371	0.7366	0.692399	0.82844	0.820474
32	0.701397	0.74305	0.475255	0.567961	0.507286	0.716595	0.64779	0.653153	0.835351	0.825129	0.899408	0.830499	0.673903	0.463076	0.364897	0.360493	0.396405	0.54628	0.670042	0.723066		32	0.780044	0.588163	0.580731	0.487294	0.682591	0.808845	0.846853	1.1316	1.0331	1.04057	1.24455	1.04268	0.822584	0.850887	0.743363	0.806945	0.774336	0.668107	0.694033	0.614383
33	0.699162	0.747636	0.56086	0.625332	0.551556	0.776587	0.715436	0.633042	0.822005	0.870222	0.763058	0.885133	0.668303	0.45464	0.414532	0.36545	0.531977	0.69577	0.599507	0.67885		33	0.761917	0.574858	0.578642	0.592803	0.701037	0.786772	0.865961	1.16668	1.12293	1.04258	1.25729	1.00336	0.754307	0.819948	0.784834	0.844146	0.86293	0.890671	0.775587	0.759619
34	0.68925	0.668537	0.474525	0.614415	0.677819	0.754101	0.658827	0.71754	0.783909	0.844958	0.86887	0.835912	0.639213	0.463004	0.400159	0.415024	0.364434	0.609281	0.61504	0.522748		34	0.770965	0.621121	0.511616	0.56816	0.692588	0.871873	0.838402	1.11136	1.14816	1.04443	1.1265	0.963825	0.699955	0.691578	0.774465	0.846477	0.94564	1.00449	0.728196	0.796455
35	0.678777	0.739764	0.620662	0.632605	0.532624	0.656208	0.749184	0.677809	0.762024	0.777397	0.872164	0.902957	0.535178	0.438382	0.408541	0.378106	0.357555	0.619261	0.607001	0.693784		35	0.763163	0.609077	0.610643	0.590761	0.682121	0.741943	0.815451	1.08867	1.16673	1.03777	1.05857	0.922302	0.682268	0.627322	0.767809	0.788416	0.880099	0.797016	0.893876	0.793119
36	0.694056	0.670287	0.525444	0.612179	0.633252	0.825109	0.734202	0.755784	0.866529	0.680387	0.806201	0.878253	0.668139	0.460576	0.413041	0.374077	0.417745	0.689109	0.641072	0.691664		36	0.733941	0.644899	0.620063	0.610169	0.645403	0.757041	0.85915	1.10586	1.11772	1.0832	1.00403	0.886259	0.638115	0.671957	0.843527	0.945212	0.838535	0.723267	0.857772	0.743733
37	0.781469	0.685312	0.597398	0.667697	0.610502	0.81885	0.705368	0.682929	0.871823	0.735749	0.869287	0.840221	0.524346	0.413115	0.404509	0.376815	0.351192	0.560375	0.680098	0.610054		37	0.665823	0.718556	0.566062	0.642562	0.716627	0.709075	0.82292	1.04833	1.10279	0.899234	0.99651	0.918206	0.581572	0.668556	0.818402	0.98239	0.92893	0.663367	0.884627	0.772754
38	0.781458	0.643101	0.520435	0.70106	0.565536	0.789259	0.77329	0.776936	0.941277	0.778827	0.894044	0.866677	0.598739	0.388908	0.422251	0.385207	0.379177	0.609257	0.692243	0.729351		38	0.667468	0.731521	0.655369	0.596625	0.785727	0.682984	0.858363	0.956025	1.11319	0.980395	1.05979	0.939876	0.618776	0.655875	0.752742	0.743789	0.761565	0.67378	0.84305	0.712984
39	0.809147	0.699904	0.549747	0.6538	0.556334	0.742994	0.763188	0.776745	0.782144	0.820178	0.903346	0.847227	0.777085	0.472496	0.415304	0.399815	0.37465	0.523445	0.711136	0.684876		39	0.650184	0.76882	0.640247	0.554193	0.731328	0.683424	0.93308	1.04119	0.980592	1.0337	1.05771	0.861937	0.609285	0.612212	0.813454	0.73539	0.723918	0.756229	0.966441	0.8553
40	0.792004	0.678437	0.548871	0.70586	0.539786	0.779929	0.794897	0.837436	0.794122	0.873974	0.85319	0.942894	0.644703	0.43465	0.461785	0.355799	0.380423	0.443726	0.719271	0.68691		40	0.839973	0.814421	0.641101	0.561842	0.696257	0.648072	0.707906	0.906521	1.0075	0.956624	1.11479	0.993131	0.669709	0.595078	0.796869	0.737418	0.603085	0.759824	0.967215	0.808614
41	0.734922	0.696665	0.618199	0.709718	0.650241	0.789667	0.799417	0.804284	0.715279	0.917468	0.897919	0.922732	0.693964	0.456342	0.429771	0.408522	0.390241	0.443675	0.725156	0.696707		41	0.823262	0.805028	0.650301	0.598241	0.738451	0.655454	0.695829	0.922023	0.957592	0.977132	1.06749	0.992001	0.702891	0.528072	0.802119	0.775452	0.701277	0.880107	1.04838	0.838712
42	0.712249	0.706087	0.543888	0.743017	0.669381	0.743731	0.85514	0.769184	0.840098	0.83821	0.904249	0.913337	0.740715	0.4802	0.438484	0.364809	0.39104	0.427056	0.688286	0.694075		42	0.805154	0.740994	0.644923	0.552704	0.63278	0.650773	0.7252	1.04929	0.886365	1.07409	1.12572	1.03997	0.781304	0.591407	0.657244	0.76015	0.600774	0.921376	0.952242	0.823072
43	0.728234	0.68716	0.609077	0.734342	0.672196	0.711954	0.828719	0.877996	0.903072	0.854828	0.816802	0.892455	0.634726	0.423387	0.413491	0.353106	0.372306	0.513863	0.794961	0.78148		43	0.759164	0.805304	0.616203	0.622443	0.610838	0.654868	0.774823	1.0936	0.900165	0.924714	1.19428	1.06921	0.770686	0.535391	0.604176	0.729009	0.779572	0.840582	0.864349	0.840802
44	0.6992	0.686429	0.447164	0.525928	0.702388	0.810663	0.737067	0.884064	0.813365	0.926277	0.87737	0.989064	0.68141	0.446716	0.428464	0.372906	0.401053	0.497599	0.723687	0.64803		44	0.702989	0.800639	0.589693	0.656339	0.637633	0.784292	0.977792	1.00071	0.926891	1.09138	1.28231	1.09556	0.75583	0.527784	0.648819	0.729356	0.662358	0.623978	0.751696	0.930288
45	0.740139	0.724106	0.466497	0.557338	0.626044	0.690415	0.751233	0.774674	0.853036	0.888554	0.870609	1.00146	0.638689	0.428446	0.422488	0.372189	0.390413	0.543394	0.704645	0.739696		45	0.798102	0.780561	0.574734	0.6994	0.622403	0.639962	0.688878	1.01586	0.838125	1.06313	1.30167	1.09471	0.699882	0.609211	0.601919	0.734853	0.697884	0.696522	0.682325	0.972004
46	0.696752	0.706633	0.568201	0.567427	0.625577	0.58495	0.811853	0.8444	0.730527	0.893941	0.843088	0.92879	0.615315	0.40935	0.381376	0.411984	0.397251	0.574384	0.726294	0.714839		46	0.851139	0.712335	0.654716	0.612948	0.62187	0.711466	0.968535	1.07485	0.864487	0.901802	1.20016	1.07015	0.693479	0.524409	0.626724	0.708735	0.677076	0.465458	0.742754	0.777595
47	0.697597	0.66328	0.521955	0.598858	0.538642	0.670573	0.784003	0.87943	0.7695	0.868761	0.866949	0.842008	0.590615	0.457313	0.37485	0.398321	0.496162	0.666209	0.729446	0.674857		47	0.748584	0.728528	0.573854	0.696716	0.574333	0.779862	1.10395	1.08908	0.923736	0.937818	1.29633	1.00817	0.703943	0.545654	0.618024	0.68195	0.732746	0.66604	0.832899	0.872928
48	0.681036	0.726256	0.464962	0.684586	0.421936	0.518636	0.85806	0.839869	0.701629	0.792258	0.861597	0.834745	0.557659	0.405883	0.382536	0.416137	0.450281	0.64812	0.694379	0.584864		48	0.819351	0.70008	0.640018	0.66489	0.641	0.65417	0.775895	1.0917	0.885974	0.896615	1.20445	0.87579	0.652774	0.614271	0.66207	0.688703	0.67999	0.374497	0.638739	0.856163
49	0.683597	0.673105	0.436483	0.512999	0.554907	0.78495	0.869213	0.776228	0.792774	0.768855	0.84145	0.847969	0.535357	0.393142	0.457989	0.420701	0.401199	0.622837	0.736864	0.655635		49	0.815321	0.704303	0.63213	0.640847	0.613917	0.715608	0.813949	1.09031	0.876623	0.963393	1.21184	0.929572	0.700227	0.593743	0.655161	0.707649	0.612725	0.561705	0.780196	0.81336
50	0.694142	0.704953	0.552825	0.520912	0.569151	0.81827	0.817836	0.838866	0.793374	0.894671	0.884191	0.750574	0.531507	0.408816	0.428937	0.379287	0.473124	0.629405	0.721289	0.697894		50	0.830458	0.773513	0.61205	0.638925	0.619217	0.652601	1.06233	0.916061	0.893756	1.00199	1.14986	0.865973	0.712297	0.558149	0.632092	0.680281	0.736015	0.484266	0.780774	0.896365
51	0.732537	0.723783	0.589879	0.509517	0.517393	0.844104	0.877953	0.854036	0.815549	0.78937	0.852523	0.748582	0.498388	0.433297	0.434957	0.357773	0.514916	0.682271	0.687802	0.646903		51	0.806836	0.696668	0.598211	0.64259	0.624226	0.743603	1.08797	0.929334	0.89799	1.0359	1.18931	0.852551	0.65775	0.551638	0.603965	0.699573	0.690226	0.529142	0.857343	0.887864
52	0.701122	0.693808	0.458892	0.458899	0.599694	0.877903	0.880269	0.823897	0.921566	0.780577	0.895652	0.776902	0.484738	0.418065	0.425924	0.352321	0.441192	0.687714	0.740768	0.603537		52	0.852508	0.713979	0.582909	0.617689	0.572267	0.792805	1.09192	0.918932	0.925967	1.12844	1.01113	0.826408	0.709662	0.613209	0.62968	0.722158	0.683436	0.50162	0.871255	0.824816
53	0.733757	0.640497	0.567902	0.410234	0.621042	0.887747	0.932753	0.884066	0.840772	0.87162	0.918734	0.868011	0.493925	0.41884	0.404254	0.36515	0.541899	0.738055	0.643947	0.674028		53	0.839377	0.688804	0.627662	0.63784	0.663833	0.870765	1.09752	0.848723	0.934627	1.00608	1.0596	0.884605	0.737837	0.634145	0.607027	0.698391	0.806501	0.513767	0.706264	0.760917
54	0.747043	0.7266	0.626879	0.465182	0.607636	0.817259	0.812514	0.922568	0.850174	0.789507	0.907866	0.754958	0.428724	0.386571	0.390471	0.31399	0.54521	0.766467	0.742645	0.690205		54	0.828037	0.6666	0.635677	0.626796	0.662485	0.766999	1.07973	0.951753	0.886758	1.1465	1.00326	0.890477	0.704891	0.580784	0.671299	0.735248	0.769445	0.758963	0.493981	0.623936
55	0.743137	0.697256	0.58587	0.469031	0.624785	0.883365	0.812937	0.90247	0.760111	0.86399	0.842258	0.750605	0.446378	0.430842	0.36828	0.340272	0.532046	0.733883	0.714797	0.636702		55	0.754394	0.64861	0.6962	0.655784	0.656213	0.850873	1.04923	0.88629	0.959301	1.07611	1.01855	0.941984	0.729775	0.586706	0.643771	0.772396	0.79651	0.654291	0.733525	0.645063
56	0.74506	0.651384	0.560607	0.439694	0.67688	0.763824	0.826622	0.95036	0.847242	0.830405	0.874282	0.712462	0.445655	0.361913	0.388876	0.595847	0.702161	0.663048	0.557843	0.5751		56	0.819043	0.656451	0.643948	0.642684	0.729207	0.890254	0.971597	0.858397	0.945285	1.12562	1.10249	0.8431	0.652034	0.626721	0.604318	0.78157	0.853141	0.6497	0.647235	0.677316
57	0.758897	0.672438	0.587822	0.485045	0.685712	0.755636	0.813276	0.907553	0.877432	0.873994	0.856194	0.617194	0.423578	0.369838	0.356795	0.64106	0.784056	0.708648	0.47467	0.475163		57	0.816587	0.661142	0.681229	0.60857	0.654234	0.886155	0.921094	0.888989	0.993896	1.25069	1.0179	0.990666	0.617816	0.650292	0.613458	0.805266	0.692583	0.728433	0.792097	0.705595
58	0.723256	0.680511	0.476928	0.450794	0.685583	0.728194	0.858487	0.846307	0.796306	0.936033	0.829637	0.598888	0.398529	0.39483	0.422317	0.667733	0.731431	0.586738	0.469551	0.54643		58	0.744463	0.656067	0.662266	0.614977	0.660025	0.938204	0.863889	0.938338	0.950262	1.23976	0.980278	0.962239	0.643794	0.657026	0.610215	0.764252	0.661773	0.492485	0.670644	0.74305
59	0.685217	0.646488	0.577263	0.405931	0.706983	0.724279	0.772566	0.803157	0.822675	0.939836	0.837607	0.629146	0.451572	0.375869	0.447535	0.635665	0.645973	0.511216	0.613757	0.636755		59	0.700448	0.667319	0.662112	0.664238	0.643091	0.827377	0.832621	0.948906	0.915465	1.18273	1.15113	0.996182	0.651466	0.611672	0.61199	0.79025	0.78054	0.476673	0.723573	0.602852
60	0.70464	0.599611	0.537808	0.392678	0.69911	0.81122	0.694402	0.94503	0.876021	0.97541	0.863789	0.606213	0.388684	0.392832	0.475458	0.561285	0.621853	0.547351	0.596318	0.647958		60	0.821324	0.67009	0.65193	0.598327	0.669074	0.85792	0.852028	0.955284	0.987286	1.34182	0.890775	1.01568	0.679185	0.624404	0.614463	0.791597	0.805734	0.635867	0.665801	0.778543
61	0.747149	0.605601	0.463849	0.37714	0.647395	0.826899	0.858176	0.901535	0.906276	0.941531	0.894647	0.669947	0.426711	0.351144	0.430381	0.590608	0.557105	0.586963	0.677909	0.687535		61	0.653651	0.663489	0.668122	0.660009	0.629315	0.919807	0.904714	0.962631	1.17319	1.14998	1.02452	1.03436	0.719374	0.630259	0.637645	0.853504	0.688089	0.551577	0.747466	0.82091
62	0.770884	0.626107	0.444554	0.429599	0.668816	0.784749	0.900928	0.896392	0.82242	0.972155	0.873752	0.630573	0.433586	0.378872	0.437449	0.566962	0.649747	0.502095	0.574429	0.698546		62	0.794417	0.656699	0.681228	0.6637	0.641533	0.801931	0.850495	0.921068	1.15404	1.19061	1.06528	0.910524	0.760217	0.671994	0.659753	0.816842	0.769043	0.630293	0.849133	0.71231
63	0.741272	0.627547	0.49981	0.469218	0.709583	0.872231	1.02336	0.816365	0.959625	0.872778	0.867215	0.61875	0.402874	0.455441	0.402439	0.303628	0.484843	0.628848	0.539105	0.716452		63	0.919458	0.653355	0.668	0.615806	0.659313	0.817165	0.915742	0.964195	1.08102	1.18412	1.10388	0.96748	0.736668	0.640941	0.655782	0.818338	0.639165	0.690123	0.70826	0.582158
64	0.758299	0.65162	0.500105	0.444657	0.682816	0.772507	0.717024	0.947509	0.917894	0.906366	0.827184	0.658343	0.373703	0.456341	0.381866	0.579859	0.563078	0.6666	0.652369	0.708166		64	0.799854	0.662757	0.707522	0.675896	0.655543	0.783564	0.891651	0.822859	1.07066	1.30744	1.12641	0.935671	0.774745	0.608077	0.617465	0.799374	0.723051	0.591502	0.695985	0.701481
65	0.769834	0.555602	0.428485	0.353889	0.586563	0.791262	0.888397	0.764266	0.881667	0.946858	0.865426	0.615484	0.372017	0.367528	0.380053	0.323673	0.578913	0.550521	0.475499	0.727182		65	0.917561	0.691665	0.666419	0.605859	0.566122	0.70475	0.876961	0.920498	0.86151	1.12432	1.11119	0.92036	0.761094	0.599876	0.634155	0.827516	0.66158	0.400867	0.789886	0.781611
66	0.712553	0.64811	0.52225	0.387884	0.623494	0.794012	0.879856	0.806897	0.947899	0.922919	0.842327	0.712554	0.397281	0.374225	0.368223	0.28751	0.425662	0.63604	0.540699	0.698029		66	0.754458	0.63035	0.660182	0.58885	0.644382	0.791371	0.875873	0.947114	0.995238	1.17211	1.10091	0.97073	0.754048	0.584713	0.661146	0.880411	0.715148	0.700217	0.657981	0.761491
67	0.776096	0.696351	0.523662	0.40193	0.623173	0.805422	0.931651	0.862552	1.02872	1.05877	0.884866	0.607782	0.36202	0.355019	0.381457	0.579724	0.385869	0.332051	0.554254	0.573689		67	0.56987	0.671103	0.603673	0.672901	0.641622	0.787281	0.85606	0.828596	0.99384	1.01909	1.17573	1.02528	0.777114	0.589796	0.587575	0.813696	0.707638	0.686417	0.716658	0.716028
68	0.75416	0.639719	0.505202	0.427118	0.646988	0.826834	0.915767	0.900709	0.961105	1.04466	0.886344	0.56014	0.373358	0.351758	0.406263	0.29933	0.483119	0.604517	0.54432	0.662063		68	0.774236	0.636392	0.59553	0.638303	0.665139	0.805376	0.874447	0.839282	0.914233	0.933552	1.30142	1.05346	0.900395	0.615132	0.555675	0.816594	0.620115	0.670391	0.732981	0.566252
69	0.672855	0.620927	0.421267	0.393791	0.655946	0.858799	0.831042	0.886039	0.964424	1.03135	0.985309	0.758023	0.40581	0.372177	0.324947	0.366336	0.44088	0.458593	0.28948	0.526758		69	0.833993	0.679585	0.567114	0.670662	0.654996	0.799986	0.808922	0.939907	0.886187	1.25932	1.15034	1.02053	0.758562	0.571179	0.547918	0.832039	0.517069	0.744809	0.700537	0.755445
70	0.666655	0.658414	0.467182	0.439319	0.639551	0.783649	0.807523	0.880442	0.924678	0.943422	0.974984	0.816143	0.420301	0.379683	0.363186	0.300389	0.287267	0.503364	0.363675	0.650745		70	0.779376	0.674238	0.590353	0.629647	0.609255	0.786722	0.83074	0.817041	0.886061	1.15062	1.33103	0.964926	0.844282	0.591608	0.535392	0.793424	0.753673	0.605433	0.371674	0.775975
71	0.683976	0.647536	0.448875	0.482925	0.644226	0.798392	0.922511	0.81206	0.885789	0.881565	1.02281	0.810256	0.467155	0.404143	0.304036	0.283691	0.313994	0.337539	0.363583	0.617387		71	0.791296	0.624329	0.590485	0.663916	0.672902	0.852921	0.812862	0.846869	1.11291	1.19083	1.24654	1.13578	0.887181	0.624812	0.54347	0.828416	0.642837	0.759527	0.737665	0.641922
72	0.700483	0.661317	0.566991	0.417485	0.625304	0.76134	0.75471	0.923829	1.07323	0.965343	1.03611	0.886116	0.575853	0.415189	0.368821	0.360281	0.24014	0.325145	0.348192	0.530258		72	0.733567	0.648318	0.583884	0.645856	0.623856	0.749992	0.779095	0.77121	0.940056	1.06933	1.20636	1.0268	0.983938	0.660686	0.598038	0.748165	0.652617	0.756107	0.819299	1.18073
73	0.767494	0.664567	0.49906	0.479182	0.624358	0.649279	0.641914	0.867466	0.79598	0.843586	0.983807	0.886597	0.557253	0.415757	0.369581	0.281327	0.367914	0.305157	0.360699	0.555495		73	0.926606	0.643398	0.577896	0.678292	0.63956	0.699562	0.899324	0.747897	0.854681	0.989757	1.0781	0.997388	0.980852	0.597182	0.598232	0.835772	0.674758	0.680863	0.709055	0.84392
74	0.823585	0.631042	0.519993	0.419623	0.69788	0.804289	0.792651	0.838532	0.843578	0.800611	0.992822	0.90107	0.609414	0.432945	0.288516	0.27336	0.292174	0.243186	0.353234	0.608426		74	0.638233	0.687636	0.578357	0.653951	0.635128	0.735963	0.894718	0.870734	0.800388	0.932799	1.12434	0.987854	0.917198	0.606694	0.589083	0.802572	0.541805	0.7089	0.808994	0.730071
75	0.717706	0.602332	0.450658	0.446743	0.794644	0.805514	0.853905	1.02684	0.912096	1.05531	1.00281	0.990913	0.635165	0.49945	0.286784	0.2676	0.299942	0.29643	0.311214	0.49981		75	0.896377	0.656596	0.573242	0.66003	0.636279	0.692807	0.860257	0.729343	0.833933	0.918582	1.04935	1.07596	0.929059	0.71265	0.602039	0.808042	0.606473	0.488796	0.711841	0.922968
76	0.669874	0.648137	0.547656	0.455455	0.788313	0.786018	0.743784	1.01771	1.05399	1.13791	0.992088	0.797309	0.512098	0.379447	0.277127	0.336725	0.351653	0.276755	0.30285	0.382245		76	0.838181	0.670148	0.584476	0.653149	0.627666	0.7004	0.919095	0.783222	0.801724	0.847841	1.0631	1.13708	0.838213	0.608998	0.574857	0.803017	0.602575	0.597358	0.755714	0.811942
77	0.650809	0.631027	0.525471	0.312222	0.683047	0.793651	0.792893	0.981031	0.996151	1.09207	1.02435	0.715606	0.389126	0.36717	0.293003	0.344001	0.260601	0.321144	0.278985	0.498521		77	0.836811	0.644995	0.580203	0.646555	0.61122	0.722917	0.793757	0.769801	0.851083	0.826387	0.984888	1.09604	0.87432	0.651804	0.647442	0.798409	0.637989	0.649881	0.653929	0.810846
78	0.834483	0.762212	0.478888	0.360039	0.701891	0.782293	0.792783	1.00174	1.0021	1.12785	0.883865	0.906783	0.563166	0.319692	0.344907	0.281139	0.483052	0.285174	0.287573	0.43108		78	1.00114	0.662795	0.597392	0.659716	0.598702	0.745052	0.835676	0.904771	0.825298	0.805689	1.00492	1.12982	0.894595	0.59183	0.720215	0.768396	0.588452	0.578266	0.73156	0.584284
79	0.616281	0.739861	0.579673	0.442477	0.667904	0.64465	0.793063	0.849684	0.662404	0.920509	1.07372	0.8618	0.523166	0.462732	0.265118	0.344087	0.56216	0.299079	0.315706	0.367307		79	0.857245	0.663582	0.586515	0.681512	0.66779	0.700824	0.983053	0.810069	0.842859	0.785523	1.07731	1.07798	0.863428	0.608199	0.686843	0.70861	0.681129	0.643467	0.736288	0.669972
80	0.64188	0.614435	0.46437	0.419561	0.638188	0.398088	0.784404	0.82801	0.611632	0.974323	1.04653	0.778356	0.414684	0.338568	0.374362	0.434922	0.650484	0.283859	0.299001	0.517862		80	0.962731	0.650861	0.590369	0.638322	0.658733	0.724228	0.951709	0.785805	0.869945	0.784616	0.987152	1.09985	0.90082	0.610859	0.628243	0.715899	0.635421	0.618016	0.738362	0.73965
81	0.538579	0.670453	0.638131	0.366948	0.489686	0.432854	0.75697	0.983392	0.774139	0.93035	0.920965	0.740642	0.548397	0.443144	0.287966	0.309242	0.324163	0.220682	0.285329	0.546338		81	0.948215	0.661601	0.641788	0.62428	0.637958	0.725068	0.891903	0.899044	0.835012	0.760838	0.963997	1.09158	0.879954	0.795276	0.610314	0.745038	0.6226	0.670337	0.762825	0.738893
82	0.500769	0.662097	0.759168	0.330091	0.63845	0.522579	0.803904	0.953853	0.928873	1.086	0.904208	0.862384	0.508457	0.384515	0.274488	0.284073	0.346846	0.306253	0.293389	0.5482		82	0.716984	0.62986	0.621913	0.634713	0.658993	0.726379	0.955377	0.947528	0.856608	0.803679	0.942452	1.07894	0.851335	0.660963	0.588689	0.754413	0.698979	0.597074	0.676148	0.663752
83	0.703223	0.547441	0.754814	0.309821	0.661299	0.754275	0.702259	0.848611	0.776084	1.1299	0.855861	0.815077	0.468967	0.392816	0.241152	0.263966	0.574048	0.307051	0.300724	0.529311		83	0.602922	0.669401	0.62587	0.653948	0.611306	0.796138	0.907805	0.853469	0.805307	0.843036	1.04789	1.02185	0.887737	0.772679	0.648031	0.77616	0.518283	0.670257	0.439945	0.636024
84	0.401892	0.589303	0.620336	0.375556	0.705284	0.674338	0.567784	0.600416	0.970423	1.0792	0.833838	0.662975	0.298408	0.300547	0.24543	0.287516	0.273736	0.28973	0.374643	0.739735		84	0.615736	0.68118	0.574987	0.660661	0.639416	0.836975	0.937139	0.929723	0.808813	0.750406	1.01932	1.07059	0.830162	0.727721	0.631398	0.739248	0.624372	0.614567	0.710115	0.692881
85	0.4848	0.463267	0.59223	0.359066	0.674566	0.69419	0.679989	0.666339	0.925389	1.18455	0.906272	0.583482	0.38459	0.251689	0.326644	0.233063	0.507287	0.29382	0.275584	0.688348		85	0.612747	0.686728	0.599653	0.614931	0.630353	0.745131	0.880034	0.949864	0.788696	0.821469	0.91801	0.890308	0.836793	0.623976	0.570669	0.63932	0.705991	0.770193	0.715673	0.734656
86	0.512214	0.306141	0.411711	0.345699	0.612788	0.764795	0.76571	0.775038	0.915494	1.05793	0.886077	0.947787	0.372193	0.379264	0.339984	0.281294	0.447902	0.270114	0.315135	0.652502		86	0.60937	0.660063	0.609855	0.606244	0.65387	0.888419	0.934056	0.987961	1.15298	0.925211	0.983238	0.832974	0.896361	0.659686	0.632922	0.632743	0.679072	0.779926	0.691504	0.741563
87	0.50062	0.224713	0.289418	0.474237	0.637316	0.913044	0.907239	0.878089	0.842591	0.927621	1.11631	1.04368	0.593201	0.323798	0.353597	0.309183	0.46089	0.249477	0.330028	0.593008		87	0.671715	0.640259	0.593795	0.619621	0.680191	0.928022	1.01498	1.0142	1.25329	1.19835	0.860332	0.800021	0.905868	0.746502	0.546137	0.674099	0.639639	0.849471	0.636761	0.702054
88	0.526599	0.30464	0.314883	0.350014	0.71153	0.904741	0.971753	0.672805	0.914927	1.00302	1.05297	0.917854	0.445083	0.341423	0.335274	0.287836	0.306322	0.287482	0.686473	0.644373		88	0.582398	0.592011	0.59105	0.594892	0.685008	0.940751	0.885686	1.08371	1.47243	0.878809	0.998922	0.829334	0.86175	0.790771	0.639056	0.534733	0.629861	0.605646	0.728313	0.816449
89	0.537471	0.243968	0.313917	0.333159	0.754749	1.01453	0.906061	0.495975	0.828134	1.08112	0.990592	0.828919	0.418295	0.297174	0.356533	0.292876	0.482977	0.221623	0.489534	0.760569		89	0.685251	0.641838	0.611698	0.572132	0.658621	0.931036	1.02291	1.15433	1.56964	1.09388	0.732547	0.729363	0.81835	0.740625	0.626389	0.430718	0.486653	0.677495	0.751468	0.745807
90	0.506356	0.239293	0.287202	0.250367	0.696517	0.783704	1.04755	0.738973	0.666863	0.997645	0.614339	0.799674	0.516157	0.295341	0.323121	0.405393	0.400434	0.282999	0.602566	0.682846		90	0.684301	0.648302	0.594325	0.562486	0.652963	0.934126	0.982111	1.11026	1.42525	1.14157	0.71597	0.79259	0.877299	0.735246	0.483973	0.564262	0.726317	0.627564	0.679098	0.808416
91	0.526166	0.273002	0.304075	0.258076	0.56945	0.816249	1.07034	0.777171	0.656926	0.857529	0.497669	0.779511	0.421224	0.273128	0.407715	0.250438	0.303204	0.291305	0.578531	0.822832		91	0.775393	0.664082	0.570203	0.544401	0.668359	0.888474	1.00931	1.05499	1.40735	1.31312	0.70251	0.892963	0.873595	0.754895	0.496847	0.592014	0.726698	0.529093	0.72247	0.662943
92	0.611577	0.261437	0.321519	0.341034	0.748382	1.00263	1.01049	1.06624	0.784258	0.343301	0.546157	0.725117	0.472887	0.314512	0.398926	0.28759	0.281094	0.261744	0.726737	0.76904		92	0.655552	0.645494	0.594199	0.594104	0.678959	0.920783	0.976539	1.07198	1.24075	1.18224	0.660102	0.858286	0.919077	0.779187	0.609373	0.603436	0.599659	0.643723	0.642407	0.699481
93	0.558736	0.292237	0.242495	0.305074	0.73889	0.933273	1.00287	1.24985	0.776836	0.476497	0.4911	0.796365	0.454753	0.332665	0.519098	0.307796	0.320629	0.276768	0.733892	0.759221		93	0.6048	0.648873	0.587315	0.613062	0.686118	0.890927	1.01162	1.04156	1.52236	0.948348	0.787416	0.862971	0.967339	0.750343	0.644693	0.515172	0.704186	0.575695	0.727122	0.722352
94	0.46162	0.309711	0.278356	0.451847	0.853412	0.923483	1.017	1.13104	0.820809	0.651952	0.659496	0.72161	0.678013	0.337278	0.347082	0.312852	0.312115	0.314561	0.678743	0.768765		94	0.63439	0.593508	0.58575	0.645213	0.698526	0.885729	0.933023	1.23537	1.28975	0.787874	0.949598	0.873174	0.854927	0.597025	0.679794	0.662236	0.629082	0.687149	0.576776	0.676581
95	0.53426	0.268123	0.425962	0.468244	0.819545	0.863345	0.564799	0.980087	1.02201	0.791447	0.783689	0.609835	0.405637	0.414281	0.417436	0.289255	0.321452	0.280614	0.670519	0.715601		95	0.67071	0.621174	0.594066	0.647391	0.70557	0.948261	0.956584	0.962723	1.29236	1.10759	0.723252	0.793194	0.876103	0.717014	0.567598	0.748132	0.70603	0.698625	0.767941	0.641646
96	0.431343	0.280752	0.485519	0.489643	0.795128	0.768037	0.817324	1.02481	0.927178	0.954929	0.949421	0.651292	0.395711	0.477611	0.46321	0.305385	0.249083	0.332429	0.760827	0.649553		96	0.682744	0.624186	0.565779	0.641297	0.73064	0.93335	0.866074	1.07317	1.29363	1.12896	0.768755	0.763401	0.945763	0.740632	0.603071	0.766541	0.718892	0.725727	0.729006	0.789777
97	0.41909	0.26176	0.434451	0.611786	0.826652	0.683427	0.648676	1.10135	0.893217	1.08731	1.01111	0.573525	0.33679	0.578511	0.432439	0.311439	0.223891	0.329335	0.704774	0.561879		97	0.613916	0.641016	0.586459	0.639571	0.731012	0.888216	0.822074	1.01307	1.19272	1.01083	0.742501	0.888754	0.893797	0.748471	0.637402	0.424507	0.69993	0.68574	0.6852	0.753689
98	0.419611	0.262798	0.309828	0.623952	0.723984	0.781234	0.843695	0.962239	1.03316	1.05167	1.0303	0.752949	0.484498	0.499906	0.399983	0.289973	0.267463	0.283937	0.59936	0.515609		98	0.629084	0.668307	0.530737	0.568436	0.698004	0.956716	0.926401	1.17172	1.31433	0.89025	0.896966	0.805401	0.904729	0.693399	0.649826	0.345188	0.626535	0.659677	0.771786	0.747728
99	0.447238	0.298453	0.352538	0.550557	0.686241	0.769709	0.846884	1.09295	1.04843	1.04018	0.938499	0.903372	0.399849	0.542965	0.374211	0.311396	0.282963	0.322148	0.64006	0.412386		99	0.642624	0.68184	0.559554	0.567001	0.730993	0.911402	0.885619	1.04256	1.19862	0.839634	0.834491	0.854841	0.859231	0.621219	0.566742	0.577084	0.697397	0.767571	0.72347	0.715231
100	0.448094	0.360139	0.266178	0.534472	0.605387	0.475482	0.81977	1.0493	1.12166	1.00024	0.802039	0.87928	0.536205	0.505695	0.220709	0.286663	0.249483	0.299503	0.662153	0.440041		100	0.656918	0.678646	0.572551	0.507329	0.6975	0.883918	0.87684	1.06775	1.20755	0.889047	0.824474	0.850594	0.863361	0.680977	0.595263	0.53315	0.638571	0.611572	0.737864	0.689125
101	0.402276	0.392644	0.342395	0.529935	0.569645	0.506209	0.830943	1.10287	1.05464	0.906879	0.881658	0.772358	0.630743	0.593823	0.372603	0.316824	0.330335	0.301718	0.692415	0.368387		101	0.647809	0.656497	0.580156	0.534759	0.676309	0.89915	1.00854	1.32413	1.21671	0.814878	0.869686	0.782501	0.806537	0.670056	0.642994	0.572747	0.563101	0.631385	0.7501	0.728787
102	0.292676	0.423108	0.372245	0.561043	0.675413	0.411309	0.634511	1.03775	0.946155	1.04151	0.827378	0.74276	0.496796	0.584204	0.31018	0.252625	0.302295	0.482836	0.637867	0.403978		102	0.698422	0.655614	0.576029	0.50663	0.709351	0.892854	0.914415	1.43126	1.174	0.772926	1.07631	0.755378	0.795935	0.75046	0.581442	0.541355	0.58358	0.722998	0.71452	0.696398
103	0.305501	0.404952	0.305152	0.511625	0.623998	0.630706	0.678053	0.872548	1.02365	0.878211	0.956607	0.775601	0.634028	0.6436	0.299019	0.317197	0.278704	0.685068	0.601313	0.316057		103	0.663909	0.601604	0.570794	0.507725	0.699297	0.866306	0.8619	1.28046	1.05897	1.11107	0.674625	0.814653	0.768866	0.7339	0.662615	0.553763	0.481905	0.608211	0.694187	0.632715
104	0.359656	0.470275	0.339303	0.493405	0.647379	0.583924	0.68026	0.83308	0.958545	1.0085	0.911319	0.911699	0.456605	0.519917	0.275334	0.237705	0.232572	0.653463	0.552858	0.388275		104	0.768381	0.576211	0.547031	0.5002	0.662499	0.87947	0.968406	1.24219	0.951766	0.890197	0.95798	0.958995	0.851098	0.671351	0.62385	0.399242	0.561462	0.619475	0.682895	0.723766
105	0.369938	0.411929	0.371717	0.343826	0.586506	0.682478	0.771485	0.900201	0.971021	1.07448	0.9777	0.776631	0.757306	0.522292	0.38061	0.254754	0.268609	0.72334	0.581887	0.493424		105	0.730102	0.622703	0.575553	0.481357	0.63276	0.85488	0.903974	0.974062	1.11764	0.903782	0.96066	0.859583	0.8064	0.690696	0.5253	0.538703	0.5599	0.626817	0.701808	0.818603
106	0.280512	0.393218	0.334194	0.311533	0.589718	0.695132	0.837436	1.10565	0.966004	1.06902	0.927514	0.865112	0.615449	0.416518	0.314425	0.35385	0.443997	0.78979	0.459105	0.405701		106	0.645163	0.594492	0.581154	0.51575	0.601999	0.884171	0.809438	1.02408	1.03989	1.21139	0.87755	0.775033	0.787376	0.776986	0.632754	0.562039	0.567383	0.621812	0.759512	0.639073
107	0.381209	0.4411	0.282173	0.321313	0.565697	0.483071	0.982653	1.03787	1.10872	1.09247	0.868789	0.776124	0.744509	0.38823	0.316424	0.333743	0.631266	0.819133	0.421872	0.385672		107	0.645874	0.610184	0.572895	0.461647	0.606998	0.873637	0.877819	1.13121	1.06788	1.14086	0.877751	0.805512	0.799883	0.799443	0.570448	0.512963	0.50276	0.594049	0.77697	0.649875
108	0.502303	0.38866	0.23264	0.263454	0.547035	0.655135	0.990654	1.02782	1.11841	1.18931	0.710637	0.708777	0.531179	0.51177	0.290403	0.206433	0.581961	0.831288	0.48552	0.501776		108	0.693935	0.646111	0.549933	0.474359	0.607059	0.880635	0.817536	0.89161	1.23012	1.114	0.864454	0.789419	0.771427	0.856757	0.617407	0.53882	0.549569	0.531224	0.724868	0.595944
109	0.476761	0.341978	0.20761	0.303778	0.520407	0.710666	1.04761	0.917821	1.16645	0.937534	0.839122	0.689944	0.227099	0.424742	0.253385	0.441867	0.590641	0.856167	0.581225	0.541466		109	0.700568	0.619066	0.590126	0.46642	0.630633	0.882331	0.837907	0.868886	1.17833	1.01023	1.14084	0.796729	0.801311	0.814015	0.685711	0.562102	0.504771	0.602617	0.641902	0.656068
110	0.527259	0.27604	0.192853	0.260257	0.494988	0.649376	0.956737	1.04901	1.05171	0.993822	0.81355	0.514741	0.254306	0.371005	0.167933	0.234439	0.251429	0.915529	0.748861	0.594419		110	0.621413	0.639768	0.569069	0.469223	0.636192	0.842159	0.887649	1.02188	1.07158	1.02706	0.877364	0.778023	0.804205	0.67961	0.508921	0.46682	0.569308	0.567036	0.709	0.649305
111	0.499734	0.199473	0.176246	0.347187	0.510419	0.571396	1.05362	0.939126	1.0763	0.892927	0.794931	0.505157	0.286557	0.353268	0.310005	0.229733	0.284888	0.616304	1.06492	0.733853		111	0.601652	0.642916	0.567491	0.480641	0.596329	0.894689	0.811929	0.940278	1.09973	1.05581	0.744904	0.668139	0.752344	0.669768	0.519434	0.533616	0.476945	0.552715	0.639386	0.554601
112	0.480619	0.202579	0.226886	0.306999	0.49218	0.447798	1.04875	1.14389	1.16451	0.917748	0.855376	0.418128	0.358391	0.362575	0.260298	0.222088	0.280437	0.802975	1.06094	0.784925		112	0.564463	0.669297	0.562047	0.494267	0.617611	0.918649	0.842066	0.857023	1.25932	0.914031	1.00707	0.687464	0.729239	0.680281	0.615946	0.490688	0.480725	0.54184	0.664462	0.555647
113	0.356613	0.250078	0.258083	0.29838	0.536351	0.656726	0.970691	1.06886	1.09599	0.865162	0.718776	0.475868	0.275875	0.257933	0.322394	0.163184	0.245763	0.777879	0.870008	0.768406		113	0.597012	0.637284	0.557475	0.553417	0.562674	0.877843	0.893056	0.87939	1.15641	1.16551	0.89634	0.662873	0.810058	0.665306	0.55535	0.566332	0.574756	0.532928	0.653014	0.527781
114	0.407758	0.304758	0.24644	0.330722	0.519957	0.647144	0.879604	0.904532	1.04911	1.00076	0.548732	0.452407	0.27871	0.230396	0.338123	0.170427	0.600192	0.864352	0.926794	0.635298		114	0.556529	0.60329	0.59543	0.539545	0.603861	0.9155	0.851514	0.972478	1.02679	0.854259	0.832288	0.851206	0.72461	0.674545	0.611644	0.555901	0.552782	0.609419	0.629751	0.586849
115	0.368087	0.33379	0.236744	0.312608	0.447198	0.771263	0.680318	1.02257	0.881405	0.889505	0.531884	0.444128	0.268755	0.245922	0.362049	0.340142	0.81398	0.998632	0.948416	0.796156		115	0.642422	0.606808	0.556511	0.5769	0.538007	0.883195	1.03592	0.859924	1.045	1.0808	0.912969	0.718168	0.71512	0.626585	0.547852	0.521896	0.436242	0.554457	0.60157	0.640493
116	0.475485	0.258863	0.221926	0.363134	0.575045	0.864008	0.758319	1.11611	0.549985	0.764243	0.468454	0.558807	0.254129	0.271476	0.249783	0.802213	0.862747	0.960862	0.69187	0.759298		116	0.68343	0.665551	0.580783	0.539637	0.606248	0.934574	0.898489	0.981248	1.19522	1.17264	0.734252	0.65053	0.688918	0.673399	0.529424	0.517562	0.544518	0.510777	0.624472	0.655362
117	0.635941	0.318548	0.260242	0.326149	0.38056	0.627505	0.895285	1.16585	0.77929	0.817025	0.441082	0.565145	0.230812	0.237477	0.301022	0.251873	0.810256	0.898048	0.911392	0.713376		117	0.551785	0.661301	0.555267	0.56965	0.594033	0.837027	1.09507	1.00619	0.972155	1.11663	0.779765	0.665216	0.702197	0.685597	0.51733	0.464976	0.535361	0.528938	0.646379	0.509501
118	0.563902	0.277317	0.324147	0.342638	0.40894	0.774534	1.05501	0.937879	0.863065	0.664101	0.457868	0.556003	0.240981	0.242581	0.26994	0.772511	0.840385	0.922137	0.748734	0.580726		118	0.680133	0.566526	0.569692	0.532789	0.622766	0.847705	1.02379	0.975948	0.923458	1.11967	0.982628	0.599894	0.666296	0.693448	0.54745	0.501815	0.493679	0.539508	0.654211	0.681771
119	0.605485	0.266668	0.263916	0.309516	0.371576	0.731942	0.816249	0.806822	1.00879	0.572188	0.554093	0.567256	0.285378	0.254632	0.428964	0.723704	0.852382	0.717733	0.718276	0.721517		119	0.61566	0.620646	0.575164	0.528335	0.620474	0.830262	0.982808	0.774935	0.88956	1.08561	1.0108	0.682931	0.790189	0.667469	0.594325	0.489115	0.555093	0.528594	0.66771	0.621445
120	0.565534	0.299861	0.268104	0.31416	0.306555	0.524637	0.889842	1.02892	0.951918	0.457978	0.61775	0.603107	0.228143	0.296737	0.367677	0.851316	0.901255	0.930422	0.608929	0.773588		120	0.660486	0.616116	0.52818	0.55343	0.641863	0.822179	1.03472	0.863749	1.06855	1.25884	0.979948	0.69999	0.753736	0.618855	0.614813	0.476935	0.524799	0.468773	0.616732	0.717475
121	0.608476	0.211596	0.276371	0.275855	0.265207	0.230585	0.967747	0.90493	0.827194	0.23566	0.686713	0.722835	0.273903	0.264268	0.478796	0.955919	0.966099	0.94971	0.654841	0.796537		121	0.68612	0.628443	0.561031	0.549468	0.601664	0.760283	1.05593	0.829535	0.995655	1.16654	1.05831	0.780013	0.730499	0.635752	0.601439	0.478635	0.450444	0.514483	0.577667	0.718887
122	0.666782	0.224642	0.349579	0.185397	0.363805	0.44439	0.878966	1.05448	0.964872	0.582945	0.714714	0.596044	0.243515	0.294214	0.501329	0.846277	0.736997	0.660584	0.573387	0.689704		122	0.780431	0.604143	0.587682	0.559417	0.604723	0.803974	0.966395	0.828171	1.07349	1.06521	1.00566	0.674997	0.767144	0.642311	0.532728	0.440658	0.517497	0.493115	0.5987	0.587251
123	0.648147	0.242717	0.35161	0.201028	0.322954	0.248211	0.411596	0.952176	1.05263	0.753636	0.7381	0.588354	0.263067	0.269961	0.584023	0.952931	0.799508	0.672782	0.511494	0.639669		123	0.751399	0.6358	0.548652	0.538387	0.636708	0.800332	0.935245	0.787295	0.987595	1.09055	0.913016	0.680541	0.700259	0.740716	0.520295	0.454816	0.480282	0.50065	0.527825	0.641786
124	0.552158	0.310393	0.288533	0.224721	0.316051	0.269665	0.265461	0.486247	0.880021	1.08289	0.659516	0.49564	0.291037	0.339524	0.652384	1.02399	0.665851	0.555642	0.607557	0.500041		124	0.789907	0.595713	0.57992	0.538253	0.645158	0.809311	0.913869	0.784047	1.01442	1.02462	0.881759	0.68222	0.763996	0.750088	0.522584	0.430106	0.519451	0.499422	0.606098	0.812527
125	0.557014	0.359044	0.263766	0.251392	0.345281	0.256719	0.226954	0.4047	0.816794	1.07264	0.753674	0.426126	0.360013	0.30653	0.572306	0.745281	0.642474	0.568	0.41584	0.473784		125	0.723616	0.602429	0.61677	0.495385	0.630668	0.776821	1.01925	0.858358	0.976999	1.02751	1.0616	0.636607	0.770293	0.83374	0.537122	0.428323	0.481607	0.482863	0.647581	0.717251
126	0.580132	0.376318	0.290141	0.209609	0.366668	0.269844	0.277971	0.248882	0.859866	1.10268	0.833364	0.495755	0.328326	0.297194	0.585991	0.765283	0.575537	0.673818	0.303198	0.602851		126	0.822758	0.654431	0.615775	0.535565	0.673747	0.780056	0.933461	0.805509	0.971316	1.11561	0.819143	0.667942	0.678285	0.660566	0.596971	0.444119	0.477491	0.479746	0.646383	0.832603
127	0.522069	0.51101	0.35816	0.201319	0.345282	0.205416	0.260888	0.38113	0.941298	1.05211	0.73168	0.511587	0.286231	0.26895	0.577629	0.602478	0.57297	0.342889	0.217112	0.56692		127	0.720879	0.64449	0.560839	0.528773	0.625612	0.781536	0.963261	0.794169	0.905059	1.09224	0.80621	0.640367	0.80835	0.768896	0.598258	0.418395	0.453339	0.489851	0.690072	0.771992
128	0.498792	0.566455	0.272878	0.22142	0.311816	0.21615	0.158332	0.371308	0.408612	1.12863	0.745988	0.528294	0.337176	0.276538	0.580137	0.589579	0.280833	0.306573	0.176012	0.245376		128	0.757781	0.594713	0.557265	0.555545	0.604692	0.779068	0.694033	0.762698	0.879114	1.01787	0.783962	0.78027	0.820431	0.747845	0.569046	0.417821	0.478593	0.465755	0.766676	0.703529
129	0.542777	0.591905	0.411968	0.242622	0.378296	0.227481	0.291292	0.422218	0.885886	1.02203	0.751909	0.514097	0.303658	0.284848	0.571397	0.494623	0.453555	0.319051	0.213256	0.219484		129	0.759425	0.60727	0.558934	0.549248	0.619061	0.725678	0.751604	0.757567	0.966236	1.23149	0.673749	0.76023	0.788849	0.675158	0.570107	0.436294	0.526105	0.457265	0.743931	0.75299
130	0.548923	0.651057	0.460337	0.281602	0.40406	0.310648	0.278105	0.375545	1.04181	0.808795	0.633615	0.494054	0.31801	0.341603	0.570702	0.677358	0.257458	0.296129	0.264168	0.315872		130	0.824779	0.641997	0.534164	0.534258	0.628447	0.749145	0.726038	0.91237	0.975444	0.88017	0.784576	0.665478	0.848278	0.698362	0.552847	0.442095	0.45949	0.444159	0.633151	0.607422
131	0.55092	0.62542	0.484922	0.333878	0.353526	0.167778	0.330325	0.269232	0.728392	1.01383	0.669852	0.401082	0.275879	0.433963	0.561486	0.643308	0.34677	0.175458	0.378448	0.261608		131	0.730008	0.628572	0.579042	0.51558	0.63159	0.728792	0.655438	0.883716	0.893948	0.885281	0.63639	0.730754	0.704999	0.708707	0.563445	0.51407	0.437198	0.470764	0.601364	0.726464
132	0.263643	0.577314	0.567037	0.350219	0.392231	0.284627	0.327224	0.438251	0.85851	0.771123	0.659975	0.338992	0.367153	0.485153	0.573573	0.775989	0.26847	0.201592	0.340539	0.161952		132	0.708436	0.618612	0.546787	0.539996	0.619901	0.733271	0.787176	0.73977	0.845873	0.934672	0.626674	0.806187	0.762016	0.857829	0.670541	0.502819	0.407314	0.474398	0.794573	0.631776
133	0.231336	0.434102	0.625987	0.342895	0.382903	0.278505	0.337075	0.466046	0.807217	0.996778	0.671463	0.335468	0.320611	0.491967	0.508207	0.684906	0.288973	0.187844	0.313886	0.223337		133	0.649121	0.585956	0.570253	0.537908	0.595948	0.728086	0.656922	0.759536	0.832288	0.83095	0.794537	0.657219	0.822316	0.68896	0.450219	0.446836	0.515481	0.786146	0.738412	0.668466
134	0.241283	0.292181	0.524242	0.427667	0.462978	0.33252	0.362634	0.444419	0.742951	0.98053	0.75483	0.402707	0.433441	0.49366	0.421792	0.765364	0.345149	0.218707	0.149216	0.196095		134	0.634634	0.591421	0.554379	0.541068	0.637726	0.729843	0.69707	0.828508	0.927615	0.861928	0.730036	0.709277	0.876481	0.877346	0.492497	0.44099	0.658185	0.708959	0.781739	0.694676
135	0.255053	0.348119	0.538541	0.297436	0.435317	0.385637	0.359422	0.389913	0.787019	1.02973	0.690625	0.40088	0.433914	0.460485	0.423996	0.741831	0.383437	0.352369	0.188284	0.223574		135	0.637702	0.573596	0.543314	0.533388	0.616526	0.696041	0.687097	0.928228	0.96149	0.860358	0.613439	0.741563	0.802851	0.820171	0.480299	0.451142	0.462186	0.804362	0.671092	0.651242
136	0.412598	0.269139	0.496111	0.353575	0.437901	0.456586	0.377714	0.383032	0.730667	1.00089	0.5852	0.41769	0.425961	0.420308	0.438675	0.712536	0.550886	0.437764	0.149419	0.174265		136	0.748346	0.548335	0.550297	0.555628	0.606374	0.697995	0.624671	0.720479	0.820211	0.981169	0.643677	0.740331	0.768936	0.804074	0.557653	0.445659	0.522837	0.751713	0.891445	0.726715
137	0.286617	0.284893	0.474221	0.361965	0.410044	0.464321	0.502567	0.437635	0.638714	0.867936	0.481776	0.422885	0.43465	0.382201	0.42126	0.756309	0.613228	0.448319	0.150631	0.280897		137	0.71124	0.554682	0.559989	0.517585	0.595067	0.695663	0.650535	0.732944	0.909412	0.77941	0.627989	0.697173	0.732472	0.698901	0.441651	0.480811	0.395951	0.639858	0.639097	0.585284
138	0.456637	0.305734	0.422473	0.379849	0.413998	0.510322	0.560735	0.468226	0.725573	0.762018	0.483346	0.411884	0.407968	0.363761	0.372116	0.609546	0.692192	0.616038	0.258769	0.125466		138	0.640189	0.599685	0.546046	0.536104	0.591544	0.69207	0.769421	0.77978	0.811276	0.583179	0.816766	0.658707	0.818545	0.918379	0.546372	0.480824	0.410902	0.757367	0.812233	0.618631
139	0.370651	0.440986	0.303807	0.342635	0.400554	0.501523	0.54783	0.447742	0.766568	0.76994	0.505697	0.423935	0.395571	0.367539	0.259713	0.480237	0.736695	0.591108	0.230106	0.141448		139	0.673064	0.591818	0.525687	0.483705	0.576024	0.741748	0.727137	0.852984	0.731217	0.762513	0.745333	0.66201	0.828445	0.831154	0.461958	0.486129	0.519097	0.680501	0.944989	0.650156
140	0.501613	0.453608	0.351742	0.450473	0.413488	0.497447	0.54021	0.499898	0.812997	0.485044	0.568577	0.452335	0.40227	0.350192	0.237299	0.473903	0.632508	0.566266	0.26571	0.407589		140	0.557174	0.587326	0.531007	0.507235	0.589569	0.742749	0.816222	0.963026	0.684465	0.743204	0.78917	0.741742	0.816206	0.968468	0.504708	0.471272	0.504704	0.687331	0.792246	0.556502
141	0.491087	0.498095	0.333405	0.454061	0.466348	0.460515	0.601613	0.590306	0.663913	0.358144	0.511276	0.501769	0.38935	0.339143	0.221619	0.225467	0.213616	0.544583	0.624754	0.410917		141	0.631423	0.592372	0.524622	0.477555	0.607497	0.750141	0.702845	0.932584	0.82302	0.709854	0.676885	0.753914	0.73454	0.890028	0.501979	0.499276	0.447926	0.560177	0.694781	0.671098
142	0.320669	0.310773	0.277212	0.418287	0.44304	0.505576	0.490862	0.225336	0.202422	0.552285	0.481743	0.532238	0.428121	0.384506	0.343966	0.27292	0.187775	0.365825	0.668055	0.443839		142	0.597765	0.61507	0.489215	0.503789	0.619034	0.754675	0.84079	0.83167	0.679234	0.699425	0.850496	0.787479	0.877868	0.933847	0.553208	0.521623	0.575564	0.643979	0.672138	0.574443
143	0.396665	0.249825	0.343217	0.401015	0.481274	0.562315	0.591422	0.228114	0.243781	0.432912	0.387099	0.574488	0.459529	0.414523	0.407531	0.293504	0.205681	0.329863	0.716114	0.649018		143	0.579757	0.611294	0.502072	0.502855	0.634779	0.755389	0.802852	0.81692	0.76489	0.873827	0.891374	0.644176	0.88082	0.84101	0.536587	0.5268	0.679285	0.739244	0.389327	0.516407
144	0.345646	0.377461	0.226908	0.52401	0.495949	0.543003	0.632341	0.288682	0.262291	0.498265	0.375017	0.59618	0.398485	0.4103	0.402526	0.26855	0.211533	0.366219	0.731247	0.708706		144	0.57399	0.621178	0.505664	0.489595	0.633244	0.753749	0.783475	0.915117	0.827152	0.720402	0.566492	0.780971	0.890963	0.697056	0.538993	0.445417	0.74798	0.796234	0.722296	0.548039
145	0.436758	0.241728	0.323541	0.453436	0.431279	0.591457	0.632448	0.370421	0.250576	0.471015	0.400291	0.595771	0.407646	0.459525	0.412561	0.35826	0.135963	0.346566	0.661502	0.65835		145	0.596581	0.539322	0.512488	0.500972	0.626978	0.718288	0.869515	0.766922	0.8006	0.669894	0.794699	0.753808	0.722034	0.954375	0.551167	0.457741	0.534341	0.80728	0.793621	0.693014
146	0.463867	0.267635	0.39913	0.497221	0.421623	0.530831	0.661211	0.290113	0.281747	0.516599	0.442067	0.604449	0.380084	0.439382	0.361945	0.466793	0.259465	0.392862	0.636405	0.646183		146	0.600102	0.574068	0.497327	0.526852	0.633613	0.744567	0.823158	0.873382	0.777024	0.762612	0.687111	0.777915	0.948408	0.833465	0.528627	0.575696	0.560435	0.767994	0.848184	0.656631
147	0.476782	0.388128	0.384031	0.539378	0.353383	0.579943	0.662952	0.25665	0.321215	0.392196	0.577122	0.603547	0.418631	0.433962	0.303027	0.427211	0.272236	0.513668	0.485793	0.512481		147	0.537006	0.571686	0.492326	0.498126	0.674087	0.760678	0.727692	0.740572	0.807102	0.602897	0.694401	0.760944	0.724481	0.861438	0.514993	0.563362	0.538255	0.719594	0.859843	0.61045
148	0.380413	0.324594	0.484484	0.589519	0.478493	0.646336	0.600249	0.386779	0.244725	0.429477	0.547989	0.587663	0.383982	0.435128	0.33885	0.42174	0.475964	0.549116	0.607875	0.566329		148	0.602732	0.592315	0.500704	0.54071	0.640696	0.716992	0.824533	0.845054	0.87072	0.713306	0.878597	0.863548	0.791681	1.05473	0.545083	0.605349	0.736587	0.838472	0.778836	0.543117
149	0.325065	0.43191	0.506231	0.581554	0.461223	0.547235	0.557634	0.260173	0.30127	0.416778	0.543718	0.485308	0.399798	0.424584	0.346187	0.439052	0.441172	0.475629	0.530236	0.592355		149	0.714194	0.607071	0.536856	0.497766	0.677907	0.760863	0.962944	0.887235	0.816965	0.962241	0.777381	0.877977	0.98707	0.828757	0.548991	0.708077	0.538254	0.98816	0.609407	0.535993
150	0.349499	0.221659	0.554497	0.484999	0.403227	0.616558	0.52081	0.259078	0.305751	0.565856	0.459291	0.477628	0.432021	0.446185	0.272526	0.453538	0.405845	0.582698	0.605576	0.567357		150	0.613361	0.618549	0.562091	0.502324	0.672668	0.766087	0.806705	0.809396	0.837909	0.786848	0.743793	0.811625	0.898909	0.758326	0.545576	0.640821	0.733982	1.04553	0.762146	0.395595
151	0.335014	0.392334	0.596526	0.28075	0.51762	0.573766	0.478437	0.200662	0.267516	0.426162	0.391911	0.421897	0.46595	0.436512	0.286517	0.499448	0.494977	0.647669	0.504852	0.336239		151	0.571127	0.619519	0.521683	0.500084	0.668987	0.754529	0.82255	0.720553	0.798548	0.898775	0.699111	0.872156	0.879369	0.587419	0.393715	0.518328	0.743712	0.800939	0.775343	0.732565
152	0.370319	0.340635	0.630782	0.550889	0.424681	0.565846	0.466969	0.188196	0.243109	0.4269	0.246229	0.453381	0.477072	0.45984	0.301812	0.406384	0.419698	0.717098	0.435963	0.313552		152	0.604467	0.6256	0.53181	0.504069	0.621839	0.756803	0.949298	0.979309	0.879645	0.78667	0.65504	0.858543	0.740836	0.541102	0.516055	0.598044	0.772093	0.921975	0.820868	0.641892
153	0.32986	0.471582	0.519051	0.547735	0.513802	0.600814	0.339473	0.19729	0.28244	0.34145	0.278435	0.429675	0.582351	0.439339	0.383987	0.544354	0.363524	0.478104	0.594029	0.481348		153	0.641057	0.641246	0.53773	0.50609	0.631408	0.793338	1.08229	0.815376	0.708631	0.795654	0.759702	0.899049	0.769125	0.494003	0.416065	0.487251	0.629191	0.915425	0.86637	0.873161
154	0.314022	0.316508	0.47571	0.529575	0.54239	0.58569	0.516854	0.240255	0.226947	0.238418	0.331852	0.309619	0.438162	0.575077	0.59371	0.417812	0.558924	0.801044	0.503999	0.534997		154	0.714483	0.65381	0.544325	0.472239	0.599826	0.769249	0.807972	0.832683	0.810186	0.695236	0.762504	0.88404	0.873467	0.517348	0.458713	0.51997	0.733365	0.965428	0.971015	0.732175
155	0.208589	0.185159	0.232462	0.597027	0.576374	0.56663	0.563705	0.26678	0.315897	0.261675	0.543598	0.469831	0.656611	0.466832	0.354607	0.424775	0.524318	0.700641	0.552944	0.413387		155	0.755667	0.692407	0.548375	0.483389	0.588778	0.750353	0.845857	0.856474	0.829933	0.887391	0.710162	0.86686	0.689492	0.493853	0.457647	0.467618	0.705958	0.954264	0.90783	0.966715
156	0.212357	0.162512	0.228719	0.658436	0.567637	0.624127	0.494927	0.339274	0.310243	0.248331	0.807534	0.437973	0.658261	0.46141	0.304099	0.354203	0.560236	0.606343	0.485554	0.375433		156	0.753168	0.718404	0.515111	0.467139	0.541381	0.770537	0.789395	0.758657	0.775397	0.79941	0.591971	0.838271	0.747193	0.491833	0.412595	0.526628	0.850291	0.982055	0.929959	0.999172
157	0.14599	0.160516	0.196686	0.5367	0.476921	0.722789	0.367983	0.371849	0.331476	0.292176	0.716412	0.593016	0.764484	0.476625	0.35549	0.347661	0.590255	0.753592	0.440762	0.129281		157	0.823187	0.679336	0.521654	0.504893	0.58445	0.762059	0.776442	0.748508	0.855666	0.686228	0.626723	0.810424	0.710754	0.488051	0.453376	0.514984	0.792832	0.91596	1.01257	1.03643
158	0.19969	0.13523	0.223822	0.328549	0.52965	0.804519	0.506716	0.423506	0.32972	0.238497	0.825037	0.746444	0.62484	0.540669	0.365847	0.387139	0.637321	0.604536	0.344443	0.168802		158	0.693085	0.715629	0.533905	0.49211	0.58697	0.762693	0.754476	0.792952	0.801467	0.740322	0.886382	0.944708	0.693385	0.742288	0.522141	0.596865	0.824042	1.16254	1.02318	0.70205
159	0.189695	0.189278	0.183508	0.228961	0.466462	0.723538	0.400844	0.373649	0.318316	0.353624	0.856703	0.595595	0.584989	0.503771	0.258332	0.377228	0.518934	0.689684	0.32856	0.169985		159	0.661917	0.704816	0.518738	0.492218	0.614217	0.751095	0.977844	0.927159	0.754626	0.777946	0.813967	0.831868	0.688089	0.828311	0.481401	0.556722	0.55342	0.714904	0.754982	1.01768
160	0.416516	0.142638	0.235175	0.325578	0.413247	0.641246	0.449075	0.332407	0.307617	0.357414	0.597352	0.768623	0.533872	0.51875	0.272637	0.385604	0.568665	0.529239	0.432054	0.282237		160	0.75353	0.681555	0.482068	0.56728	0.588718	0.727961	0.791923	0.878565	0.779581	0.830676	0.641176	0.878827	0.63203	0.727718	0.491811	0.549644	0.53088	0.776553	0.917335	1.0698
161	0.483784	0.189112	0.17123	0.3481	0.413606	0.631475	0.356247	0.356879	0.278509	0.362766	0.70828	0.609606	0.617884	0.415524	0.238551	0.289793	0.434192	0.566991	0.439002	0.407896		161	0.896998	0.622918	0.482212	0.569677	0.626354	0.733695	0.91885	0.92111	0.90006	0.871546	0.717297	0.797832	0.640163	0.811361	0.517743	0.610146	0.453653	0.761541	0.679402	0.941553
162	0.308755	0.21654	0.146733	0.455922	0.45059	0.684395	0.421169	0.316238	0.336046	0.436095	0.551577	0.537901	0.589152	0.439009	0.225223	0.300654	0.296225	0.608978	0.446823	0.486184		162	0.935611	0.666456	0.515529	0.496518	0.646591	0.762325	0.955769	0.886359	0.712409	0.796555	0.7189	0.756886	0.742379	0.847152	0.526657	0.535566	0.413399	0.732287	0.80042	0.837719
163	0.413471	0.177385	0.15938	0.404913	0.400641	0.561263	0.476426	0.341532	0.33705	0.421155	0.797461	0.491346	0.615009	0.451536	0.272664	0.337358	0.454484	0.6243	0.377214	0.484821		163	0.849547	0.690693	0.512898	0.586434	0.676914	0.757698	0.848576	0.859067	0.822367	0.748011	0.672311	0.899106	0.857374	0.71577	0.477159	0.59962	0.36123	0.597433	0.74373	0.789046
164	0.415877	0.16623	0.188508	0.482602	0.439057	0.622503	0.374327	0.256373	0.30452	0.518615	0.714127	0.553712	0.628577	0.404424	0.241343	0.310283	0.655853	0.465559	0.489396	0.533755		164	0.846398	0.666201	0.506161	0.499238	0.654538	0.812348	0.880661	0.891809	0.861186	0.73753	0.824167	0.901307	0.785205	0.683972	0.482441	0.558152	0.446445	0.654825	0.791819	0.996296
165	0.419532	0.174177	0.168134	0.342481	0.389697	0.591093	0.430544	0.279101	0.323858	0.596274	0.805129	0.589813	0.67507	0.37101	0.207373	0.316278	0.629289	0.644576	0.406201	0.460698		165	0.804183	0.692577	0.524408	0.487578	0.683428	0.780471	0.882094	0.826684	0.749435	0.773754	0.776753	0.7067	0.89059	0.730784	0.524992	0.52386	0.480952	0.715838	0.787391	0.956539
166	0.538172	0.220178	0.166838	0.406328	0.434822	0.523468	0.401	0.283806	0.330308	0.62335	0.775116	0.40488	0.571587	0.45022	0.241802	0.271727	0.740565	0.560439	0.436935	0.542817		166	0.767352	0.695036	0.520506	0.506955	0.644312	0.865871	0.856592	0.791652	0.685901	0.861317	0.778097	0.815272	0.779653	0.536419	0.402866	0.468905	0.6192	0.730871	0.878904	0.885856
167	0.518777	0.251961	0.199158	0.433088	0.360576	0.408942	0.556031	0.374528	0.36917	0.659198	0.661736	0.462414	0.643317	0.405209	0.337753	0.398808	0.640792	0.641581	0.664588	0.298371		167	0.736438	0.664533	0.53527	0.49411	0.701621	0.795528	1.04574	0.850149	0.962897	0.739963	0.963226	0.756387	0.853316	0.629834	0.42364	0.517506	0.547375	0.718876	0.893349	1.00498
168	0.540122	0.297725	0.220892	0.434114	0.33435	0.45114	0.52727	0.350458	0.387873	0.67885	0.658671	0.52052	0.634349	0.350996	0.297136	0.29182	0.646608	0.6611	0.710172	0.562137		168	0.796134	0.676649	0.528856	0.490681	0.682593	0.764425	1.04215	0.874679	0.877734	0.736693	0.977004	0.872139	0.715822	0.554286	0.414731	0.509948	0.546699	0.62606	0.829221	0.809058
169	0.538784	0.287345	0.278044	0.43237	0.338718	0.381332	0.447494	0.391699	0.471672	0.722219	0.706127	0.65703	0.664994	0.309213	0.270188	0.336873	0.65315	0.72763	0.722143	0.405163		169	0.644099	0.69018	0.506795	0.486634	0.686628	0.789844	1.02171	0.799444	0.809122	0.823594	1.0059	0.699976	0.810428	0.482259	0.395174	0.450316	0.564276	0.768216	0.927233	0.890205
170	0.455289	0.170097	0.125919	0.362815	0.399783	0.330815	0.268124	0.384143	0.351854	0.705128	0.628991	0.42902	0.750063	0.317532	0.330095	0.243327	0.502887	0.708561	0.670865	0.551482		170	0.655434	0.702327	0.543616	0.526987	0.673416	0.81614	0.927269	0.830712	0.935824	0.889149	1.03953	0.864534	0.658408	0.418464	0.415549	0.401447	0.524846	0.863458	0.877485	0.955662
171	0.400543	0.199043	0.255378	0.431113	0.395921	0.343669	0.558178	0.185362	0.303616	0.582895	0.78483	0.187702	0.743593	0.439047	0.268726	0.31973	0.396455	0.626752	0.763797	0.625889		171	0.721899	0.691396	0.490815	0.65889	0.6311	0.821053	0.847909	0.909514	0.774134	1.08215	1.17137	0.789508	0.652046	0.427892	0.41331	0.566925	0.816315	1.0503	0.885909	0.857544
172	0.346644	0.307497	0.3191	0.443307	0.307741	0.145765	0.584227	0.273358	0.282145	0.646343	0.775164	0.440463	0.564887	0.505398	0.340167	0.287988	0.477817	0.620217	0.676104	0.500621		172	0.78855	0.742083	0.518174	0.558865	0.667854	0.7542	0.92798	0.905871	0.834923	0.887655	0.982575	0.793415	0.768841	0.44011	0.412109	0.441288	0.558974	0.775131	0.761042	0.882184
173	0.366756	0.212909	0.405752	0.35659	0.129781	0.251275	0.535816	0.479735	0.350458	0.606442	0.758934	0.182083	0.545116	0.349681	0.268458	0.316635	0.514542	0.741452	0.625898	0.406701		173	0.79973	0.700319	0.583601	0.618795	0.651181	0.816206	0.999282	0.780427	0.881782	0.815521	0.835813	0.709878	0.593675	0.473211	0.534724	0.399931	0.40378	0.570024	0.807557	0.9806
174	0.382385	0.287776	0.492374	0.460339	0.104525	0.342862	0.641561	0.719134	0.361224	0.560236	0.699827	0.530974	0.327729	0.486202	0.298446	0.390032	0.613939	0.614835	0.42148	0.333238		174	0.721005	0.728435	0.581076	0.60635	0.71151	0.850121	0.934936	0.79692	0.93364	0.947701	0.809312	0.827086	0.532744	0.455545	0.455112	0.39458	0.655845	0.907283	1.00901	0.908542
175	0.358758	0.207661	0.416446	0.491204	0.372453	0.409964	0.683551	0.535587	0.326846	0.547256	0.574389	0.270477	0.492961	0.292388	0.284577	0.339714	0.572398	0.477414	0.364749	0.396002		175	0.80705	0.759104	0.560872	0.560106	0.644149	0.842421	1.07553	0.863166	0.760899	0.785601	0.969866	0.783909	0.585083	0.508545	0.461504	0.425613	0.707667	0.621132	0.812939	0.985391
176	0.466766	0.372877	0.530543	0.411837	0.467346	0.456769	0.67279	0.673444	0.322046	0.479107	0.57053	0.21036	0.448908	0.340588	0.224388	0.281284	0.598517	0.516175	0.316916	0.400473		176	0.753535	0.716029	0.5031	0.495304	0.63751	0.80305	1.05533	1.01963	0.813684	0.787276	0.740633	0.774325	0.671807	0.560596	0.409871	0.584773	0.714145	0.96349	0.742987	0.777838
177	0.439239	0.45656	0.537642	0.516457	0.41443	0.38872	0.488113	0.994259	0.357806	0.346181	0.63452	0.217824	0.391564	0.389466	0.310942	0.247569	0.563318	0.605217	0.305313	0.201559		177	0.583775	0.764017	0.545037	0.539589	0.623897	0.814203	1.20439	1.0468	0.93434	0.809122	0.78561	0.766691	0.515764	0.511591	0.433183	0.460612	0.649966	0.708864	0.613876	0.909482
178	0.564795	0.508435	0.570117	0.494417	0.459882	0.46552	0.628728	0.83885	0.213712	0.448153	0.717386	0.399977	0.298635	0.317082	0.283025	0.295808	0.465029	0.545037	0.222194	0.289461		178	0.786582	0.719867	0.532449	0.485208	0.630462	0.765124	0.862004	0.87905	1.05545	1.01959	0.681646	0.667461	0.73545	0.467357	0.393102	0.489546	0.640947	0.647007	0.817196	0.918844
179	0.53163	0.470315	0.604256	0.551884	0.392014	0.403952	0.486593	0.863403	0.257851	0.587105	0.658077	0.402171	0.174902	0.337422	0.276025	0.298307	0.542624	0.496883	0.335381	0.242799		179	0.835089	0.722294	0.578684	0.57172	0.626574	0.776357	0.892629	0.8378	0.906824	0.960281	0.534471	0.847657	0.661511	0.471749	0.425692	0.46497	0.580461	0.739578	0.770167	0.850681
180	0.531219	0.575216	0.683627	0.498125	0.378679	0.372592	0.477577	0.700173	0.72714	0.573291	0.79839	0.500643	0.365505	0.349186	0.29069	0.378542	0.465834	0.496031	0.190248	0.367166		180	0.839606	0.753369	0.563111	0.593107	0.631499	0.85193	0.895314	0.880485	0.748556	0.787695	0.682396	0.703086	0.802622	0.52314	0.550327	0.470212	0.538648	0.656125	0.743786	0.732967
181	0.606016	0.633158	0.584394	0.445358	0.307497	0.430982	0.396553	0.62203	0.705548	0.366213	0.545475	0.446583	0.390133	0.54522	0.278233	0.30602	0.511636	0.514168	0.167839	0.416018		181	0.690311	0.704186	0.619965	0.481394	0.645216	0.813407	1.05474	0.90168	0.807052	0.78781	0.553226	0.862396	0.905869	0.62388	0.510671	0.558652	0.565162	0.725211	0.779424	0.759365
182	0.61388	0.629804	0.529305	0.268104	0.334256	0.567659	0.330156	0.66073	0.297415	0.437253	0.608004	0.556838	0.344948	0.3494	0.2557	0.515733	0.619001	0.224075	0.200313	0.355727		182	0.677418	0.686292	0.623003	0.526413	0.652573	0.781233	0.988349	0.863468	0.877688	0.963018	0.669941	0.755214	0.681717	0.43211	0.448955	0.535046	0.690178	0.688392	0.645082	0.713724
183	0.421119	0.665026	0.562778	0.425054	0.296333	0.502047	0.527494	0.507802	0.326705	0.592394	0.523104	0.605969	0.262191	0.315873	0.277216	0.195785	0.549448	0.456229	0.268883	0.42312		183	0.726004	0.689831	0.606849	0.459042	0.690555	0.727485	0.832391	1.2023	0.91592	1.02998	0.820734	0.67918	0.724423	0.483903	0.399733	0.555231	0.682625	0.751379	0.768936	0.80585
184	0.584186	0.817637	0.448223	0.27124	0.345998	0.523532	0.611799	0.544519	0.513978	0.570357	0.613141	0.560399	0.161358	0.230158	0.28669	0.186353	0.469512	0.423841	0.150243	0.440645		184	0.835017	0.721603	0.561813	0.445404	0.636158	0.7371	0.915098	1.23068	0.913997	0.911282	1.0883	0.681471	0.686909	0.499567	0.426744	0.526595	0.666138	0.812519	0.67198	0.751124
185	0.693105	0.67024	0.465573	0.353233	0.262701	0.554168	0.573206	0.566973	0.590661	0.424804	0.559389	0.53091	0.180949	0.437288	0.264176	0.259325	0.513578	0.275123	0.136872	0.436134		185	0.845903	0.751826	0.547949	0.493507	0.616863	0.762535	0.880927	1.15038	1.15389	0.908372	0.978966	0.760872	0.727735	0.602695	0.458239	0.691443	0.668263	0.730705	0.867742	0.712673
186	0.749746	0.573446	0.401817	0.402237	0.294779	0.415067	0.646078	0.628909	0.267857	0.45161	0.567016	0.553043	0.223421	0.533658	0.215803	0.493385	0.226861	0.160297	0.18318	0.579462		186	0.941816	0.657971	0.514356	0.573745	0.602972	0.747942	0.81847	1.08993	1.0574	0.781431	0.882391	0.709286	0.801731	0.580611	0.474188	0.546708	0.759574	0.683275	0.891467	0.865134
187	0.618479	0.57453	0.557211	0.340728	0.441158	0.437126	0.599081	0.766034	0.265626	0.451444	0.510318	0.587619	0.173674	0.466769	0.268982	0.44815	0.245721	0.182798	0.128532	0.567895		187	0.774726	0.704909	0.505122	0.570946	0.585538	0.75663	0.932063	1.11834	0.985226	0.809119	0.988762	0.784664	0.634811	0.498486	0.423109	0.47874	0.561219	0.774758	0.700812	0.864973
188	0.503731	0.586544	0.476133	0.384114	0.400813	0.537177	0.725601	0.681056	0.307418	0.324071	0.541144	0.654244	0.201078	0.324097	0.558324	0.346161	0.219049	0.248825	0.125411	0.544065		188	0.643029	0.727309	0.510785	0.55731	0.560423	0.843861	1.3922	1.12568	1.00551	1.04827	0.703427	0.712859	0.811567	0.572059	0.446711	0.404871	0.704403	0.781058	0.602549	0.918495
189	0.554167	0.437595	0.558169	0.455302	0.346292	0.599228	0.695475	0.60456	0.308251	0.418284	0.492567	0.653243	0.201905	0.624408	0.211512	0.394201	0.248691	0.220075	0.493111	0.49862		189	0.840453	0.681184	0.570854	0.480952	0.609365	0.717393	1.02319	1.08108	0.883543	0.870399	0.512803	0.81172	0.778651	0.590274	0.561037	0.561923	0.475181	0.750497	0.734207	0.623912
190	0.564033	0.427019	0.429428	0.358103	0.340842	0.591519	0.624953	0.658701	0.331626	0.546067	0.502161	0.778716	0.304418	0.417842	0.730757	0.377477	0.252671	0.239193	0.440208	0.655903		190	0.786677	0.676933	0.571404	0.50535	0.542216	0.767511	1.06773	1.07005	0.852554	0.889622	0.758416	0.731263	0.811561	0.630899	0.487831	0.518284	0.612639	0.805814	0.607497	0.573905
191	0.592604	0.385423	0.392386	0.297193	0.398732	0.644805	0.609018	0.640659	0.382644	0.486473	0.58216	0.847554	0.485584	0.285808	0.720961	0.485603	0.237868	0.195574	0.423418	0.668901		191	0.601434	0.699221	0.556017	0.505562	0.566086	0.772601	1.06637	0.876293	0.986227	0.818941	0.723146	0.971597	0.863523	0.644135	0.557212	0.499392	0.6414	0.6578	0.78849	0.629854
192	0.661761	0.410208	0.405129	0.346681	0.362962	0.626006	0.728195	0.483902	0.447165	0.527103	0.689299	0.591554	0.753238	0.351448	0.684027	0.314009	0.222471	0.317253	0.432215	0.524635		192	0.756898	0.710027	0.55791	0.510685	0.532453	0.824581	1.03996	1.02754	0.931265	0.900926	0.413827	0.732256	0.956522	0.673432	0.569119	0.595732	0.572631	0.762163	0.747507	0.605079
193	0.650832	0.330921	0.447738	0.347209	0.455761	0.459735	0.604354	0.539458	0.498465	0.588639	0.682042	0.681061	0.668686	0.316353	0.825536	0.220601	0.178958	0.343854	0.474523	0.581962		193	0.574656	0.66402	0.527375	0.536826	0.551642	0.731278	1.02319	1.09135	1.07683	0.969255	0.636359	0.940859	0.844208	0.614795	0.581708	0.583461	0.501605	0.641522	0.742698	0.811011
194	0.485552	0.155039	0.360774	0.392428	0.446102	0.487832	0.641113	0.328938	0.643603	0.681182	0.63186	0.749759	0.386917	0.178103	0.764967	0.376071	0.420211	0.408114	0.42785	0.693602		194	0.604242	0.67859	0.560077	0.541697	0.532357	0.810182	1.24663	1.16776	0.884687	0.839406	0.677783	0.78575	0.919253	0.569571	0.490227	0.60153	0.539079	0.50406	0.634213	0.774294
195	0.317116	0.152264	0.143462	0.437658	0.463487	0.434027	0.592457	0.441908	0.634258	0.757081	0.658025	0.641775	0.446377	0.211131	0.765394	0.53238	0.136857	0.249758	0.602375	0.615074		195	0.66257	0.707413	0.571639	0.535537	0.527442	0.818563	1.07081	1.18709	0.947896	0.781026	0.65623	0.781114	0.748094	0.514779	0.467211	0.532599	0.504024	0.590121	0.597105	0.618267
196	0.361847	0.122843	0.16391	0.400652	0.443361	0.600027	0.678647	0.419454	0.672742	0.679971	0.662467	0.692917	0.362761	0.5957	0.787363	0.482503	0.304522	0.562785	0.610135	0.539638		196	0.729739	0.729449	0.548542	0.517553	0.546807	0.823613	1.23113	1.15552	1.03896	0.84273	0.745879	0.821187	0.870264	0.578129	0.47063	0.48784	0.595924	0.539975	0.57876	0.586829
197	0.387776	0.170755	0.173845	0.386611	0.529672	0.431156	0.71066	0.494492	0.645578	0.605288	0.685752	0.466969	0.6294	0.396678	0.96691	0.47683	0.384266	0.610672	0.595512	0.546826		197	0.719112	0.694792	0.549379	0.553684	0.580133	0.839354	1.1173	1.21099	1.03396	0.836432	0.81554	0.882041	0.919611	0.591849	0.413488	0.580164	0.430102	0.530409	0.599109	0.616439
198	0.395897	0.132577	0.147559	0.338132	0.421896	0.480305	0.636513	0.497199	0.699578	0.62879	0.663769	0.31179	0.677723	0.352972	0.875645	0.520848	0.350986	0.627846	0.52564	0.511697		198	0.67031	0.666233	0.498191	0.569067	0.562644	0.76671	1.23191	0.976597	0.814447	0.743801	0.593289	0.842356	0.759436	0.773146	0.470241	0.525155	0.604056	0.743033	0.631199	0.694929
199	0.344973	0.180615	0.136607	0.344072	0.478532	0.469372	0.650591	0.617347	0.543115	0.61829	0.521245	0.156504	0.646357	0.464503	0.98146	0.573338	0.43471	0.645715	0.630317	0.249079		199	0.692997	0.679008	0.521596	0.542121	0.595014	0.741053	1.08454	1.08885	0.891399	0.711171	0.597863	0.810364	0.737335	0.713996	0.58464	0.571813	0.657079	0.644095	0.675145	0.810736
200	0.483424	0.188029	0.2014	0.478209	0.440124	0.507441	0.431819	0.575356	0.527634	0.682293	0.463038	0.136713	0.246716	0.671523	0.849895	0.525028	0.573198	0.840731	0.285076	0.184809		200	0.615842	0.650478	0.493853	0.537894	0.598438	0.750993	1.17741	1.0827	0.854864	0.785571	0.660933	0.965932	0.849637	0.558437	0.503426	0.624909	0.592537	0.576982	0.837695	0.783616
201	0.455248	0.321496	0.411892	0.538447	0.49388	0.466489	0.522696	0.531797	0.587858	0.465891	0.491528	0.211593	0.482264	0.582227	0.905273	0.565943	0.679949	0.503043	0.182421	0.140885		201	0.567765	0.668299	0.490723	0.50947	0.574313	0.742747	1.02504	1.22733	0.905687	0.719399	0.712951	0.726783	0.831878	0.590998	0.611324	0.601192	0.617752	0.621199	0.633112	0.723534
202	0.227301	0.276979	0.583633	0.57746	0.515544	0.521415	0.512473	0.740081	0.617724	0.657405	0.366671	0.213187	0.605194	0.743257	0.900757	0.53138	0.676097	0.198805	0.229492	0.150388		202	0.662634	0.716667	0.466885	0.535506	0.587159	0.743183	1.02856	1.14278	0.881787	0.699145	0.740668	0.906393	0.821752	0.693471	0.523814	0.633271	0.727982	0.634967	0.553374	0.605721
203	0.245532	0.277678	0.64415	0.646629	0.429925	0.405465	0.65849	0.719777	0.693306	0.64351	0.505099	0.159394	0.339731	0.746509	0.847289	0.495438	0.567149	0.253005	0.130992	0.206955		203	0.798699	0.651791	0.495137	0.530621	0.621686	0.767126	0.932894	1.06249	0.898749	0.873428	0.621003	0.845617	0.810629	0.584603	0.419859	0.556973	0.62958	0.591297	0.624229	0.702689
204	0.229695	0.347252	0.625901	0.47543	0.528306	0.403768	0.738164	0.682253	0.643321	0.601757	0.569258	0.182487	0.536352	0.879531	0.665042	0.387158	0.482034	0.295996	0.255068	0.307803		204	0.608302	0.711148	0.494462	0.55299	0.565676	0.769752	1.16362	1.11814	0.859688	0.859776	0.899794	0.83523	0.798768	0.671222	0.588725	0.571449	0.569923	0.683784	0.731309	0.700991
205	0.254923	0.504551	0.641687	0.529613	0.428747	0.500795	0.787417	0.744854	0.728356	0.589539	0.44987	0.386525	0.672035	0.68917	0.548561	0.29245	0.565256	0.234277	0.111188	0.424512		205	0.670739	0.698182	0.486597	0.588349	0.549106	0.79506	1.18988	1.13965	1.04073	0.719507	0.622477	0.77669	0.749369	0.82305	0.64796	0.639336	0.619572	0.62437	0.629969	0.860223
206	0.376666	0.405091	0.677453	0.316699	0.508852	0.547839	0.621905	0.578516	0.678963	0.496507	0.405678	0.306359	0.615293	0.664106	0.446961	0.235433	0.346658	0.522572	0.179228	0.53648		206	0.640505	0.722404	0.468819	0.562656	0.556063	0.79557	1.1237	0.964101	0.956784	0.696768	0.627551	0.859368	0.904598	0.769795	0.725019	0.854403	0.717461	0.583554	0.687274	0.720636
207	0.388183	0.522807	0.66863	0.402565	0.365583	0.561147	0.581197	0.584659	0.412082	0.386322	0.442877	0.371859	0.635201	0.544308	0.634218	0.417047	0.756529	0.322051	0.137315	0.464283		207	0.720095	0.619513	0.500097	0.55543	0.58902	0.718704	1.03433	0.945655	0.913109	0.918974	0.873266	0.766156	0.867952	0.703818	0.798325	0.886058	0.762005	0.695073	0.773897	0.765664
208	0.418794	0.490742	0.613679	0.371985	0.375573	0.574385	0.470263	0.523125	0.584548	0.331892	0.424769	0.564438	0.487869	0.545779	0.283487	0.565685	0.667217	0.511272	0.234721	0.391542		208	0.839533	0.683193	0.517124	0.590357	0.57991	0.75725	1.13822	0.864485	0.983453	0.711543	0.738917	0.748837	0.787536	0.580408	0.578624	0.700793	0.730009	0.735025	0.831905	0.757672
209	0.436953	0.480273	0.585027	0.415604	0.450917	0.375755	0.508997	0.522345	0.458824	0.575324	0.458335	0.588171	0.173035	0.565857	0.276661	0.527443	0.71287	0.364253	0.13794	0.339021		209	0.801767	0.674293	0.520094	0.586487	0.567146	0.811331	0.920555	1.07168	1.05143	0.85377	0.836946	0.890096	0.646213	0.565051	0.569247	0.691987	0.565877	0.718967	0.759888	0.705917
210	0.544689	0.49451	0.391706	0.462744	0.407217	0.450137	0.553557	0.418759	0.436207	0.510446	0.550453	0.389422	0.390984	0.12403	0.520967	0.697141	0.691813	0.274066	0.170119	0.396925		210	0.663735	0.711019	0.495258	0.528392	0.551681	0.834382	1.11405	1.05412	0.918465	0.716747	0.851529	0.88078	0.766234	0.53521	0.462478	0.586898	0.62716	0.732759	0.850203	0.703977
211	0.512127	0.420555	0.27245	0.328933	0.469777	0.45148	0.493644	0.479356	0.638983	0.587688	0.584438	0.50585	0.541561	0.203052	0.613044	0.658421	0.622831	0.245952	0.146027	0.381659		211	0.715351	0.736289	0.519763	0.571553	0.559548	0.826772	1.24997	0.957026	0.925367	0.639335	0.842286	0.951106	0.926254	0.753378	0.610241	0.768885	0.700701	0.646881	0.865208	0.811475
212	0.418351	0.33272	0.128512	0.250842	0.515139	0.509804	0.524393	0.580428	0.657071	0.562391	0.645948	0.206431	0.195587	0.406841	0.569656	0.665427	0.941139	0.492706	0.29402	0.485353		212	0.660775	0.679066	0.485839	0.510837	0.576926	0.865274	0.985224	0.899023	0.974568	0.736723	0.85184	0.898958	0.752082	0.605259	0.393189	0.541802	0.703206	0.611585	0.812206	0.745121
213	0.440255	0.128399	0.140762	0.407512	0.330784	0.489528	0.462865	0.606237	0.633101	0.631359	0.756431	0.405401	0.161208	0.475767	0.151602	0.815085	0.984806	0.530447	0.170474	0.419843		213	0.81521	0.722302	0.512585	0.489638	0.587868	0.868208	0.948147	0.881833	0.938573	0.725179	0.80619	0.860184	0.876374	0.633158	0.662331	0.528987	0.638566	0.650282	0.632471	0.831544
214	0.379968	0.192901	0.114631	0.366833	0.344236	0.456359	0.598055	0.447302	0.708652	0.671823	0.782514	0.612035	0.18356	0.26159	0.209596	0.790391	1.03246	0.550915	0.417608	0.453787		214	0.757603	0.727318	0.471417	0.503979	0.57821	0.84089	1.27485	0.962967	0.818394	0.860645	0.616861	0.716469	0.973758	0.661769	0.5746	0.422471	0.700801	0.623971	0.67171	0.856273
215	0.484778	0.330346	0.155252	0.463855	0.347533	0.501462	0.480299	0.619222	0.563943	0.790531	0.766771	0.632819	0.494411	0.349943	0.230534	0.839372	0.903836	0.721164	0.542594	0.47463		215	0.805618	0.755006	0.478184	0.549204	0.549981	0.800743	1.31254	1.0759	0.800203	0.744188	0.751701	0.794382	0.699197	0.933558	0.544098	0.594757	0.708584	0.680405	0.828673	0.638238
216	0.46397	0.339744	0.312451	0.378912	0.306299	0.485391	0.634351	0.577748	0.618035	0.445722	0.707354	0.669846	0.447989	0.187538	0.298491	0.632242	0.854458	0.728564	0.366828	0.535625		216	0.701146	0.724369	0.474766	0.575058	0.564756	0.774537	1.14312	0.969006	0.922827	0.928073	0.477978	0.799324	0.666978	0.737563	0.482663	0.566584	0.633792	0.536952	0.604449	0.635408
217	0.330106	0.431503	0.291333	0.395907	0.334177	0.505261	0.647703	0.595129	0.486942	0.563363	0.641728	0.65773	0.423162	0.154428	0.48444	0.453582	0.721615	0.69363	0.442869	0.563108		217	0.692574	0.663566	0.551923	0.461744	0.59827	0.761873	1.11042	1.03234	0.917628	0.863295	0.753982	0.801192	0.728497	0.575639	0.550544	0.45038	0.503308	0.729085	0.699065	0.647019
218	0.407218	0.441808	0.335783	0.425783	0.354242	0.502495	0.591328	0.456256	0.554478	0.390956	0.602809	0.653272	0.41778	0.3242	0.604327	0.583626	0.726601	0.722007	0.527164	0.519926		218	0.591954	0.718642	0.47028	0.465763	0.58088	0.737194	1.21153	0.820919	1.0031	0.773003	0.865273	0.919621	0.750548	0.521561	0.450202	0.441635	0.673067	0.580743	0.729284	0.602544
219	0.332149	0.482471	0.48182	0.385198	0.265406	0.510833	0.675449	0.561858	0.34031	0.424881	0.551628	0.827134	0.406097	0.439727	0.789643	0.800455	0.523767	0.844934	0.401014	0.375208		219	0.664817	0.756019	0.502961	0.573688	0.547019	0.764708	1.00824	0.801744	0.998712	0.64482	0.750977	0.970565	0.888609	0.570473	0.527348	0.494587	0.450161	0.627904	0.579733	0.684183
220	0.288674	0.38682	0.670305	0.51759	0.32363	0.503841	0.796217	0.497712	0.386716	0.390538	0.558437	0.660975	0.646405	0.396032	0.49057	0.73572	0.430481	0.720353	0.444502	0.31681		220	0.554337	0.729783	0.485075	0.539274	0.574674	0.767464	0.930812	0.932083	0.771476	0.606733	0.760049	0.839907	0.660307	0.749959	0.584776	0.611739	0.686006	0.615361	0.740913	0.785614
221	0.24885	0.466172	0.496219	0.525021	0.469973	0.558225	0.691797	0.500329	0.43456	0.445036	0.425822	0.592974	0.574867	0.485187	0.639348	0.549682	0.493613	0.611886	0.381677	0.38596		221	0.607858	0.689555	0.529996	0.549961	0.589953	0.809457	0.79147	1.10023	0.997642	0.580564	1.04217	0.886535	0.445869	0.72773	0.435412	0.485948	0.592612	0.50514	0.618505	0.845308
222	0.193658	0.325107	0.546118	0.473445	0.454465	0.587917	0.662633	0.440055	0.400882	0.342128	0.550437	0.533685	0.738825	0.521743	0.71511	0.731737	0.426127	0.600901	0.286968	0.187553		222	0.941607	0.702922	0.505617	0.537746	0.596586	0.798394	0.938673	1.02007	0.968861	0.576516	0.930323	0.810368	0.740247	0.893585	0.651517	0.504303	0.705055	0.483433	0.592645	0.733353
223	0.308272	0.41396	0.50025	0.411037	0.493963	0.608447	0.57304	0.63202	0.301961	0.42487	0.523975	0.617526	0.50065	0.642473	0.59278	0.503141	0.504036	0.397576	0.11396	0.25515		223	0.772078	0.624194	0.531064	0.503574	0.603203	0.822829	0.861054	0.892603	1.01638	0.569972	0.770592	0.924601	0.73013	0.772005	0.776438	0.49648	0.518253	0.623475	0.686625	0.626527
224	0.34821	0.448347	0.42863	0.340772	0.405698	0.496772	0.674032	0.517709	0.531028	0.331441	0.587762	0.610242	0.542754	0.594486	0.750654	0.506983	0.605285	0.327997	0.116268	0.30911		224	0.823849	0.659762	0.518851	0.610086	0.584362	0.818464	0.758148	1.03215	0.737255	0.686909	0.794746	0.888614	0.776955	0.81423	0.623334	0.414343	0.463499	0.562245	0.563685	0.687858
225	0.399459	0.322344	0.43784	0.283137	0.51652	0.39672	0.679122	0.656261	0.443039	0.336289	0.574756	0.590625	0.671624	0.5904	0.628528	0.555821	0.538652	0.516485	0.147619	0.570569		225	0.726371	0.765946	0.561318	0.592104	0.553624	0.920656	1.14544	0.952578	0.756262	0.907778	0.881371	0.857492	0.487208	0.768015	0.807252	0.442705	0.470065	0.474326	0.5729	0.535124
226	0.530106	0.34919	0.261138	0.28659	0.489096	0.350672	0.657276	0.417619	0.494695	0.576192	0.415769	0.773379	0.638413	0.640697	0.644512	0.568967	0.595594	0.566558	0.0911329	0.59111		226	0.615172	0.732751	0.505007	0.595716	0.59924	0.875338	0.851255	1.13252	0.651543	0.820534	0.937999	0.860529	0.668937	0.586555	0.567558	0.391852	0.475964	0.471402	0.506927	0.58462
227	0.392094	0.249209	0.111906	0.337724	0.343236	0.387128	0.651194	0.301318	0.540083	0.584908	0.620203	0.70963	0.466976	0.569834	0.586364	0.741378	0.588404	0.590437	0.644818	0.650471		227	0.745505	0.78719	0.527033	0.575844	0.559737	0.910648	0.77946	1.02465	0.820052	0.75843	0.674532	0.761146	0.744849	0.763744	0.666509	0.520518	0.596831	0.581373	0.670607	0.543357
228	0.394578	0.264729	0.137802	0.321703	0.373885	0.55218	0.604843	0.424054	0.454927	0.458994	0.749505	0.652957	0.586927	0.571976	0.529207	0.752756	0.414844	0.716472	0.418811	0.590706		228	0.742032	0.761336	0.544343	0.542447	0.548884	0.881618	0.764588	1.15255	1.05557	0.677912	0.806155	0.853533	0.746663	0.740723	0.510688	0.599523	0.52677	0.468622	0.642065	0.679806
229	0.419821	0.187252	0.304018	0.305338	0.424536	0.48552	0.608415	0.532659	0.524381	0.628957	0.692132	0.753222	0.575916	0.610923	0.511537	0.843907	0.290277	0.856887	0.407368	0.534461		229	0.713588	0.736738	0.568564	0.525251	0.58796	0.819176	0.990218	0.853315	1.22387	0.759913	0.685729	0.776149	0.626761	0.645092	0.65913	0.601359	0.516378	0.449222	0.572019	0.640901
230	0.249014	0.277714	0.435969	0.161681	0.412363	0.466994	0.527162	0.457543	0.386619	0.485637	0.766803	0.790469	0.470389	0.686777	0.583384	0.715079	0.402544	0.705377	0.661961	0.494389		230	0.738837	0.77207	0.556793	0.588524	0.568814	0.90513	0.970035	1.09689	0.772799	0.866376	0.656116	0.810829	0.730473	0.555244	0.548522	0.537165	0.395272	0.482381	0.620695	0.675245
231	0.340167	0.335198	0.357498	0.178574	0.399976	0.49347	0.519237	0.296153	0.272311	0.50984	0.881709	0.781087	0.326484	0.736549	0.666299	0.642448	0.226151	0.239833	0.886176	0.487632		231	0.735378	0.747343	0.529466	0.566786	0.614181	0.907513	1.17127	0.843832	1.08161	0.710591	0.796052	0.794085	0.619416	0.56243	0.728859	0.466245	0.470009	0.490642	0.816605	0.677134
232	0.193867	0.438393	0.386822	0.249454	0.381536	0.520098	0.439094	0.24113	0.43466	0.621638	0.775101	0.897805	0.51836	0.561534	0.692673	0.561169	0.102206	0.365346	0.757695	0.682164		232	0.8561	0.714	0.527805	0.551663	0.569592	0.899219	1.16736	1.10241	1.09433	0.800632	0.781254	0.799212	0.765067	0.561002	0.618002	0.489706	0.488314	0.483458	0.645224	0.61941
233	0.279068	0.449073	0.368007	0.337247	0.468306	0.500291	0.474411	0.394429	0.374681	0.580186	0.602688	0.71873	0.473045	0.215973	0.700188	0.285486	0.361256	0.448759	0.699959	0.49519		233	0.806579	0.743341	0.592765	0.496505	0.596693	0.927934	1.19357	1.18546	0.982998	0.588988	0.671781	0.810572	0.6992	0.411134	0.577057	0.462604	0.365983	0.430244	0.435878	0.701355
234	0.419206	0.437465	0.371971	0.384832	0.455171	0.496764	0.432634	0.450145	0.459279	0.580347	0.710349	0.563472	0.638671	0.533872	0.660613	0.39908	0.118985	0.399616	0.896232	0.607614		234	0.812264	0.681022	0.533866	0.538928	0.607223	0.947208	1.17786	1.26101	1.03445	0.692098	0.611837	0.769218	0.720369	0.590532	0.617555	0.420983	0.410318	0.33142	0.50124	0.669464
235	0.424297	0.481934	0.338521	0.436595	0.448788	0.546441	0.401341	0.294895	0.566972	0.683892	0.724435	0.572704	0.57125	0.370046	0.617615	0.490737	0.121685	0.432777	0.76592	0.454368		235	0.698096	0.709881	0.544952	0.538504	0.639657	0.930534	1.05751	1.04309	1.02496	0.88304	0.682351	0.7344	0.687056	0.642113	0.600527	0.520639	0.36555	0.389082	0.370228	0.450685
236	0.393888	0.405773	0.421617	0.363345	0.528935	0.427552	0.50168	0.286745	0.645131	0.664758	0.653464	0.571659	0.62495	0.625871	0.703507	0.334627	0.396155	0.587317	0.679015	0.437475		236	0.698291	0.700778	0.569979	0.540045	0.653997	0.990062	0.923124	1.12477	0.969591	0.958095	0.706361	0.772112	0.770129	0.488318	0.538149	0.469249	0.381361	0.280468	0.385256	0.431265
237	0.407864	0.5636	0.375113	0.361842	0.428318	0.532752	0.446693	0.367942	0.697259	0.488014	0.538273	0.544041	0.680467	0.442109	0.782922	0.500356	0.175412	0.0956942	0.687225	0.49991		237	0.590532	0.720795	0.608114	0.661284	0.711324	0.942757	1.0238	1.23348	1.04216	0.742824	0.498164	0.828602	0.89096	0.617703	0.530222	0.379651	0.361169	0.443698	0.446531	0.57311
238	0.481227	0.513143	0.512465	0.369344	0.416863	0.472528	0.51131	0.3454	0.739687	0.563814	0.476018	0.447555	0.238819	0.554421	0.708757	0.569097	0.135563	0.578534	0.57533	0.310354		238	0.792283	0.754013	0.544917	0.614259	0.650097	1.02127	1.24895	1.28704	1.03154	0.920423	0.893463	0.745613	0.801888	0.495876	0.677827	0.348215	0.354933	0.4512	0.446331	0.616087
239	0.528312	0.633774	0.525177	0.370598	0.398442	0.535707	0.405224	0.430953	0.715616	0.61835	0.371884	0.223788	0.368359	0.566577	0.722983	1.05521	0.729806	0.265813	0.225927	0.669083		239	1.08058	0.780519	0.539936	0.641051	0.665057	1.14797	1.20658	1.07236	1.04347	0.94597	0.838991	1.04852	0.543057	0.68016	0.414501	0.54057	0.860791	0.540923	0.495014	0.586543

## Sheet: Supplement 1E
	Bin 0	Bin 1	Bin 2	Bin 3	Bin 4	Bin 5	Bin 6	Bin 7	Bin 8	Bin 9	Bin 10	Bin 11	Bin 12	Bin 13	Bin 14	Bin 15	Bin 16	Bin 17	Bin 18	Bin 19			Bin 0	Bin 1	Bin 2	Bin 3	Bin 4	Bin 5	Bin 6	Bin 7	Bin 8	Bin 9	Bin 10	Bin 11	Bin 12	Bin 13	Bin 14	Bin 15	Bin 16	Bin 17	Bin 18	Bin 19
0	0.604204	0.666346	0.498495	0.133829	0.0926713	0.374726	0.134527	0.0955839	0.116098	0.270692	0.552229	0.58477	0.635074	0.411643	0.582883	0.720847	0.527014	0.515337	0.530429	0.573408		0	1.05602	0.97142	1.01506	1.20537	1.10185	0.966552	1.30626	1.37046	1.21485	1.17529	0.957498	0.894598	0.96038	0.871234	0.922815	0.859566	0.868125	0.899859	1.06659	1.35612
1	0.574685	0.717108	0.300442	0.131773	0.166152	0.371052	0.140115	0.0718885	0.1184	0.293607	0.488151	0.552077	0.536621	0.463514	0.665092	0.699068	0.595123	0.446407	0.568413	0.642096		1	1.05518	0.946151	1.00383	1.19384	1.001	0.969337	1.33674	1.26982	1.16213	1.40156	0.870423	0.959758	0.924811	0.868705	1.02863	0.851668	0.912807	0.98719	1.15398	1.3604
2	0.691716	0.643444	0.179522	0.13692	0.187712	0.352569	0.124119	0.0753767	0.147264	0.24035	0.552931	0.598517	0.479542	0.407701	0.553202	0.602354	0.486515	0.439745	0.521105	0.612297		2	1.05839	0.91559	0.945727	1.01812	0.943649	1.06656	1.19892	1.10119	1.14101	1.15847	0.960417	1.05684	0.867026	0.858672	1.17455	0.915232	0.978856	1.04357	1.04036	1.32252
3	0.628761	0.806871	0.442865	0.167541	0.179008	0.349334	0.140783	0.0700273	0.142955	0.275655	0.57812	0.63663	0.504128	0.501737	0.634126	0.739181	0.415907	0.317028	0.53689	0.666796		3	1.13747	0.898135	0.880435	0.995365	0.973867	0.906676	1.18218	1.11776	1.09978	1.12459	0.930432	0.923024	0.903627	0.859139	1.12433	0.901399	0.94771	0.992192	0.993979	1.35167
4	0.749811	0.727837	0.38099	0.130626	0.143412	0.277337	0.148066	0.0653928	0.123859	0.243423	0.590012	0.523721	0.597608	0.388694	0.602225	0.647714	0.460943	0.459794	0.533776	0.664042		4	1.00242	0.915689	0.927243	0.938017	1.00132	1.12612	1.12809	1.08449	1.23219	1.01349	0.989665	0.899578	0.869247	0.905669	1.02455	0.986067	0.777982	0.896645	0.920066	1.18057
5	0.588866	0.587631	0.240032	0.171695	0.19527	0.271374	0.101591	0.0848943	0.117757	0.205496	0.485446	0.570502	0.571922	0.439478	0.613622	0.477181	0.243472	0.213388	0.219141	0.484658		5	0.995573	0.945713	0.893405	1.06255	1.03805	0.947484	1.06631	1.10182	1.24684	1.15339	1.05091	0.987726	0.910135	0.864209	0.960572	1.12768	0.773418	0.965002	0.874465	1.00839
6	0.53044	0.400026	0.377195	0.160279	0.220172	0.326321	0.105767	0.0910628	0.117457	0.256519	0.505108	0.494891	0.436505	0.463633	0.625243	0.477132	0.284287	0.291338	0.235535	0.442677		6	0.949125	0.945479	0.959496	0.959045	1.00288	1.08658	1.13682	0.996089	1.14096	1.24217	1.39899	1.08237	0.912742	0.920806	0.853624	1.05745	0.821911	0.948739	0.878733	1.24949
7	0.369861	0.404937	0.269955	0.288153	0.231788	0.294892	0.115263	0.136016	0.147214	0.300962	0.68375	0.468066	0.624932	0.397299	0.751561	0.652144	0.313778	0.353749	0.241579	0.408672		7	1.02589	0.935324	0.957113	1.02999	1.04048	1.14216	1.08908	0.91612	1.0852	1.13581	1.43266	1.10489	0.84104	0.908133	0.928134	1.19813	0.858169	0.882297	0.90841	1.15581
8	0.453958	0.461311	0.349936	0.248517	0.25448	0.344616	0.168026	0.147415	0.157326	0.338908	0.671224	0.494643	0.378526	0.596042	0.767334	0.632428	0.290263	0.427851	0.261616	0.330725		8	1.00611	0.905295	0.88653	0.952712	1.34336	1.11733	1.20538	1.0418	0.943454	1.14576	1.62496	1.14943	0.912212	0.939737	0.8794	1.12821	0.779924	0.950954	0.958579	1.08332
9	0.403763	0.43346	0.340291	0.277393	0.254207	0.407217	0.193941	0.168361	0.196902	0.340601	0.690335	0.532486	0.502219	0.586929	0.768206	0.689183	0.336331	0.441139	0.211516	0.414056		9	0.99244	0.977555	0.863322	1.02191	1.30955	1.02567	1.22482	0.976705	1.01732	1.33775	1.14048	1.00535	0.877685	0.710376	0.817794	0.796264	0.778238	0.95364	0.919297	1.0689
10	0.397495	0.417735	0.189625	0.313923	0.280962	0.408457	0.168657	0.168001	0.198124	0.341227	0.658346	0.575242	0.573096	0.581593	0.78948	0.686817	0.355454	0.387263	0.19803	0.548314		10	0.934836	0.914813	0.947685	1.04295	1.23898	1.35521	1.26342	1.11361	1.24943	1.37137	1.21717	1.08257	0.921527	0.757203	0.86301	0.976423	0.803024	0.908392	0.915866	0.949918
11	0.401639	0.396563	0.157066	0.252997	0.281586	0.397821	0.207457	0.202739	0.21381	0.343804	0.62709	0.663479	0.551173	0.550828	0.710926	0.630972	0.410256	0.435026	0.330052	0.527039		11	0.939572	0.919659	1.05128	1.09774	1.18593	1.31599	1.12934	1.03701	1.10135	1.11379	1.06553	1.17011	0.9368	0.895573	0.810621	1.22083	0.977958	0.7485	0.751881	0.893966
12	0.484513	0.54329	0.175123	0.258651	0.225267	0.381824	0.182733	0.20316	0.281286	0.339187	0.636948	0.582629	0.588701	0.465368	0.689331	0.600372	0.493414	0.305013	0.377664	0.424984		12	1.03785	0.949046	1.13915	1.23797	1.39982	1.0659	1.00979	0.915573	1.02296	1.07689	1.36721	1.50862	0.949625	0.781604	0.816251	1.48688	1.05764	0.712813	0.756398	0.996929
13	0.585165	0.513649	0.304801	0.192551	0.255974	0.451747	0.207975	0.196302	0.239387	0.378978	0.643302	0.503963	0.401145	0.525416	0.698794	0.624497	0.514969	0.36569	0.346417	0.512099		13	0.922142	0.973322	1.18625	1.44378	1.63129	1.19311	0.951267	1.00511	1.02969	1.39841	1.69244	1.49456	1.23685	0.974439	0.743181	1.06866	0.786287	0.709311	0.841775	0.992528
14	0.604206	0.559604	0.166406	0.222537	0.223803	0.393139	0.205085	0.182117	0.363728	0.349359	0.65135	0.607914	0.502581	0.454487	0.765808	0.696356	0.514873	0.552761	0.571558	0.609564		14	1.01484	1.04068	1.113	1.53305	0.973899	0.986906	0.947001	1.00786	1.04404	1.47167	1.65833	1.44049	1.24263	0.786105	0.90251	1.45828	0.882259	0.675976	0.831532	0.971046
15	0.594329	0.593765	0.223556	0.206114	0.256617	0.389138	0.194098	0.158468	0.240667	0.397953	0.671985	0.610725	0.460125	0.495003	0.807628	0.678535	0.417961	0.620741	0.511086	0.654303		15	0.962304	0.983165	1.23412	1.4772	0.99883	1.13942	0.896553	1.04179	1.01417	1.08306	1.64881	1.62148	0.983658	0.937704	0.890088	1.29807	0.837421	0.643792	0.768769	0.865007
16	0.601347	0.681712	0.208814	0.227083	0.214992	0.379186	0.193689	0.168363	0.247882	0.405124	0.472465	0.554889	0.451361	0.516956	0.777762	0.709429	0.53372	0.676791	0.537406	0.557777		16	0.951926	1.02016	1.20196	1.36355	1.19624	1.11347	0.940869	1.06499	1.13116	1.22209	1.61257	1.40132	0.994272	1.00828	0.825042	1.10412	0.708762	0.744909	0.969508	0.997379
17	0.561247	0.435398	0.344093	0.230175	0.248528	0.381864	0.189487	0.193453	0.300315	0.385171	0.495407	0.527619	0.441263	0.510971	0.809875	0.706258	0.644506	0.620683	0.659822	0.578397		17	1.02894	0.981976	1.29016	1.32901	1.36403	1.16868	0.942961	1.0627	1.15937	1.11239	1.53129	1.01826	0.969386	0.983799	0.987066	1.16464	0.850053	0.828944	1.68833	0.947296
18	0.531511	0.650569	0.29603	0.222782	0.195571	0.399755	0.237963	0.180833	0.253956	0.392248	0.474624	0.523842	0.385933	0.620741	0.78205	0.724944	0.521853	0.562827	0.450604	0.564348		18	0.915551	1.22139	1.33757	1.39563	1.1215	1.03338	0.991611	0.962996	1.14599	1.17568	1.29013	1.19731	0.965964	0.900451	1.26964	1.25374	1.03339	0.809435	1.25822	0.861979
19	0.587339	0.545524	0.142426	0.228208	0.231966	0.390789	0.210303	0.164754	0.231401	0.367946	0.483633	0.553152	0.26953	0.501243	0.75289	0.635446	0.442835	0.623819	0.523901	0.474847		19	0.89904	1.0676	1.21902	1.23535	1.11478	0.982302	0.983256	0.989854	0.975777	1.2365	1.69266	1.55754	0.92631	0.84107	0.903845	0.97803	0.92428	1.00649	1.24746	0.953741
20	0.546653	0.526285	0.165175	0.238945	0.198534	0.350632	0.191061	0.17812	0.245148	0.3972	0.546774	0.396493	0.254118	0.480535	0.672878	0.634692	0.423963	0.602787	0.491829	0.612959		20	0.876445	1.17481	1.40898	1.2532	0.979957	1.23608	1.05802	0.931836	1.05319	1.24356	1.71695	1.49419	0.876842	0.858724	0.887863	0.959643	0.965565	1.39054	1.40636	0.956784
21	0.601771	0.611096	0.210117	0.212168	0.275969	0.425427	0.183513	0.16762	0.209065	0.431884	0.511365	0.376082	0.32104	0.498099	0.825386	0.62151	0.38088	0.53352	0.650461	0.594835		21	0.954984	1.22188	1.3635	1.19531	1.15246	1.10102	1.09292	1.04307	0.973285	0.927071	1.25719	1.1319	0.772531	0.907749	1.01306	1.30128	1.10831	1.21768	1.39162	0.979725
22	0.623913	0.500517	0.18118	0.294509	0.401459	0.41381	0.172369	0.173559	0.259438	0.431515	0.535959	0.690888	0.439137	0.519809	0.771565	0.576209	0.365634	0.495407	0.469012	0.68233		22	0.934653	0.980859	1.2299	1.3365	1.39105	1.20092	1.02408	1.03273	1.06473	1.00456	1.32245	1.18133	0.758744	0.772361	1.07252	1.38723	1.38994	1.1481	1.15704	1.00995
23	0.60157	0.547252	0.174602	0.215637	0.217091	0.376432	0.198864	0.181369	0.27274	0.410759	0.488179	0.61933	0.52683	0.605187	0.739933	0.508025	0.320352	0.406154	0.232123	0.584361		23	1.06113	1.2401	1.30807	1.20207	1.33345	1.11197	1.09428	1.04057	0.927212	0.932408	1.20747	1.15953	0.849552	0.7512	1.04259	1.30161	1.35445	1.16559	0.949086	0.989544
24	0.568011	0.65262	0.167675	0.206506	0.232954	0.430754	0.184591	0.192782	0.266719	0.476898	0.535841	0.460608	0.571706	0.706653	0.882516	0.615372	0.356076	0.415554	0.374078	0.486883		24	1.04865	1.10684	1.25936	1.25077	1.47836	1.19589	0.984923	1.01019	0.953394	1.00375	1.45684	1.17067	0.859482	0.718489	1.05612	1.28182	1.48851	1.2261	1.03398	1.0321
25	0.703161	0.578015	0.175806	0.216292	0.343592	0.346805	0.226262	0.18356	0.258131	0.447144	0.593016	0.240214	0.420816	0.598967	0.830787	0.675656	0.405201	0.36761	0.200982	0.550813		25	0.818181	1.01917	1.23039	1.22358	1.36166	1.20803	0.960181	0.975857	1.06298	1.09241	1.60631	1.23664	0.909922	0.697257	1.06004	1.31818	1.33204	1.00702	1.14599	1.12399
26	0.763818	0.549276	0.171879	0.166479	0.398597	0.409703	0.169383	0.180027	0.263598	0.429587	0.582405	0.266499	0.296425	0.520488	0.812262	0.741621	0.483045	0.347847	0.200582	0.606196		26	0.802533	0.931881	1.04456	1.28043	1.36175	1.4266	1.03332	0.917363	0.909091	0.910166	1.25497	1.22931	0.841035	0.690329	0.672263	1.10119	1.3633	1.18329	1.3905	1.17275
27	0.703312	0.499924	0.183144	0.242109	0.373427	0.372749	0.189139	0.180291	0.265111	0.415796	0.649879	0.314749	0.320037	0.603498	0.939565	0.701769	0.386801	0.375285	0.277539	0.540448		27	0.882135	0.947859	1.1736	1.36774	1.47734	1.3492	1.07257	1.08198	0.932965	1.00259	1.25533	1.17607	0.775428	0.664301	1.04944	1.16235	1.3223	1.09911	1.26797	1.05664
28	0.680772	0.389216	0.178846	0.19411	0.217315	0.420864	0.217323	0.17461	0.250935	0.392498	0.519133	0.330335	0.522035	0.677038	0.849965	0.621636	0.368718	0.428563	0.326846	0.577522		28	0.766326	0.888719	1.35564	1.293	1.69914	1.2433	1.08402	1.11032	1.02703	1.34908	1.49785	1.08171	0.767796	0.689937	1.03285	1.36364	1.19769	0.898104	0.846503	0.910576
29	0.677431	0.600111	0.160227	0.21941	0.323662	0.388667	0.207157	0.168263	0.263267	0.448029	0.551932	0.359219	0.536902	0.641521	0.818054	0.498567	0.319602	0.391099	0.446681	0.514649		29	0.783425	1.08139	1.31179	1.15946	1.32031	1.25384	1.02169	1.04097	1.0534	1.53106	1.51107	1.23592	0.661163	0.661123	0.66905	1.18531	1.29375	1.22203	1.29525	1.19555
30	0.630617	0.630623	0.142803	0.182606	0.273333	0.435284	0.220194	0.169727	0.264783	0.434662	0.591625	0.321075	0.519248	0.741981	0.733777	0.515804	0.333175	0.430075	0.313618	0.522547		30	0.883208	0.954749	1.02069	1.11377	1.24471	1.23122	1.01524	0.959571	0.929701	1.12421	1.26145	1.15177	0.605916	0.651296	0.947247	1.30961	1.50728	1.10589	1.07597	0.878458
31	0.161106	0.369776	0.416698	0.398011	0.642403	0.454358	0.317275	0.169114	0.292764	0.519543	0.746515	0.763229	0.621027	0.625177	0.307693	0.420979	0.301579	0.246246	0.440156	0.476974		31	0.846845	0.945523	1.04396	1.13744	1.17778	1.16106	1.0289	0.97206	1.03505	1.10389	1.49865	0.896416	0.688153	0.672936	1.21486	1.27369	1.47146	1.32187	0.850235	0.921907
32	0.392866	0.140206	0.38292	0.483395	0.443457	0.421754	0.424047	0.200301	0.254626	0.551033	0.736183	0.764605	0.554365	0.548478	0.297048	0.450854	0.257262	0.270366	0.52643	0.404275		32	0.775949	0.936933	1.03973	1.06586	1.21437	1.13076	1.15336	0.953193	0.845	1.20396	1.51629	1.04386	0.569779	0.58635	1.25904	1.36273	1.19035	1.15036	0.825005	0.845295
33	0.52099	0.63962	0.220366	0.179708	0.25791	0.38338	0.222954	0.170958	0.257521	0.36499	0.562576	0.390855	0.490069	0.650637	0.629164	0.771394	0.428742	0.314423	0.432772	0.362644		33	0.855856	0.933877	1.13252	1.08065	1.3075	1.08254	1.00336	0.987662	0.978574	1.29166	1.58773	1.04084	0.537458	0.598403	1.09685	1.27168	1.54115	1.28091	0.860102	0.79714
34	0.473025	0.54014	0.350027	0.168997	0.19925	0.379468	0.230327	0.176985	0.265723	0.362022	0.635256	0.372156	0.585932	0.710144	0.666194	0.609011	0.370317	0.415385	0.441889	0.403892		34	0.793438	0.972628	1.26761	1.01996	1.09884	1.26347	1.27619	1.15242	1.09313	1.29926	1.29788	0.924698	0.679302	0.556605	0.639358	1.08712	1.32921	1.41493	1.15274	0.766908
35	0.410326	0.144062	0.411819	0.382727	0.48049	0.375101	0.333915	0.19887	0.291762	0.466318	0.709192	0.694014	0.662068	0.448243	0.332962	0.430812	0.272295	0.257058	0.457324	0.494452		35	0.756778	0.952879	1.05805	1.05258	1.19994	1.09263	1.28989	1.3185	1.12369	1.08187	1.30748	1.17534	0.773296	0.523993	0.688894	1.17388	1.19128	1.16471	1.35693	1.08005
36	0.4572	0.58016	0.333233	0.153428	0.200341	0.368057	0.230478	0.188482	0.276672	0.325089	0.54666	0.505227	0.668832	0.717546	0.723984	0.478583	0.4293	0.421617	0.44973	0.441324		36	0.778913	0.918932	0.803659	0.925256	1.27293	1.13605	1.15206	1.14841	1.17527	1.06532	1.45309	1.30575	0.716582	0.558538	0.559976	1.1242	1.27854	1.12026	1.39133	1.2374
37	0.443683	0.437559	0.49019	0.536737	0.610515	0.282885	0.359289	0.190583	0.258191	0.406976	0.661402	0.614741	0.572196	0.335582	0.167321	0.421761	0.407068	0.416795	0.418538	0.301717		37	0.898916	0.975173	0.7395	0.898589	1.12312	1.08315	1.19697	1.15947	1.26881	0.884762	1.11396	1.27934	0.725419	0.544917	0.662848	1.34294	1.20447	0.804278	1.16232	1.36428
38	0.380192	0.139567	0.439738	0.46112	0.39582	0.366019	0.333297	0.185704	0.29587	0.526659	0.544391	0.340433	0.311115	0.206139	0.323747	0.505996	0.432855	0.213498	0.496555	0.508556		38	0.95284	0.922036	0.812422	0.870686	1.11416	1.05817	1.17508	0.985479	0.936056	1.00146	0.964813	1.15339	0.688701	0.547778	0.96627	1.25291	1.17001	0.961131	1.31999	1.09579
39	0.375285	0.430345	0.44893	0.299338	0.176362	0.343348	0.274219	0.191799	0.273859	0.384718	0.420035	0.528361	0.856495	0.602596	0.541285	0.533108	0.456627	0.438043	0.309243	0.413553		39	0.95128	0.888223	0.818112	0.924812	1.26723	0.976702	0.908238	0.849268	1.06099	1.08018	1.04612	1.33764	0.679428	0.581419	0.582914	1.12323	1.37054	1.30619	1.36371	0.840646
40	0.282189	0.137674	0.371039	0.464323	0.447031	0.344792	0.323519	0.25227	0.314782	0.476726	0.634303	0.595458	0.544914	0.378116	0.324181	0.564429	0.500343	0.230234	0.560604	0.631214		40	1.14683	0.862576	0.794449	0.982224	1.01541	1.21653	1.05376	0.911528	1.07064	1.02956	1.30573	1.24341	0.609465	0.534845	0.814855	1.07512	1.35871	1.70067	1.45152	0.962983
41	0.388849	0.139324	0.342022	0.570483	0.575028	0.385439	0.323043	0.195108	0.302681	0.454379	0.655747	0.612503	0.57851	0.605681	0.497776	0.584297	0.39763	0.295619	0.604586	0.555723		41	1.02429	0.928467	0.820701	1.0613	1.1792	1.37257	0.972684	0.933114	0.974198	1.02403	1.39263	1.17652	0.621454	0.558365	0.963143	1.34326	1.49056	1.60641	1.31787	1.1271
42	0.162666	0.263559	0.522615	0.488147	0.535299	0.416762	0.307309	0.188172	0.253914	0.3699	0.452954	0.694373	0.569463	0.716404	0.405997	0.535603	0.458997	0.467183	0.552791	0.37562		42	1.12077	1.05763	0.701763	0.988046	1.02127	1.34499	1.01268	0.990194	0.984007	1.06029	1.04507	1.23649	0.661139	0.548702	1.00231	1.42262	1.3125	1.56169	1.12863	1.48251
43	0.578254	0.410324	0.469105	0.516156	0.429226	0.431416	0.334573	0.1953	0.295939	0.562395	0.562125	0.438682	0.433162	0.352665	0.376484	0.588645	0.42509	0.212774	0.514691	0.658495		43	1.19406	0.948079	0.695656	0.867456	0.945345	1.15044	0.921969	1.07135	0.938223	0.999028	1.25444	1.10425	0.660017	0.587063	0.851949	1.36073	1.16229	1.56748	1.38744	1.02475
44	0.503668	0.488551	0.492615	0.463403	0.41004	0.428642	0.324444	0.165572	0.288539	0.537289	0.694398	0.440754	0.460481	0.417015	0.372973	0.598081	0.352039	0.198742	0.523745	0.596851		44	1.10341	0.820509	0.660091	0.88638	0.911695	1.21469	1.08911	1.06598	1.12788	1.11273	1.24627	1.14461	0.796584	0.735438	1.16996	1.16819	1.1875	1.35371	1.40426	0.93552
45	0.48507	0.261356	0.325344	0.539879	0.48677	0.257429	0.320394	0.176214	0.23967	0.445492	0.604163	0.760224	0.588661	0.550052	0.420725	0.479557	0.547144	0.394856	0.561946	0.550636		45	0.97106	0.787214	0.641362	1.06332	1.27114	1.205	1.08992	1.05717	1.39073	1.21051	1.14109	1.16473	0.766697	0.755744	1.25488	1.36254	1.29129	1.4353	1.2946	0.931363
46	0.451976	0.174798	0.154021	0.483872	0.643476	0.309334	0.313599	0.182342	0.255818	0.394345	0.557394	0.829215	0.677624	0.592018	0.500043	0.547207	0.369241	0.503957	0.62252	0.504497		46	0.773968	0.704999	0.690717	0.987712	1.40832	1.22981	1.01528	1.0301	1.2532	1.045	1.07501	1.08474	0.67533	0.546602	0.968696	1.34902	1.53737	1.2054	1.3579	0.701759
47	0.387313	0.20448	0.302672	0.445662	0.574967	0.263331	0.306172	0.17902	0.239766	0.41307	0.510701	0.828448	0.647382	0.445302	0.377063	0.559255	0.336762	0.450295	0.671223	0.529272		47	0.921002	0.906512	0.827049	0.803488	1.12692	1.41797	1.03065	1.1559	1.16072	1.01404	0.976936	1.03919	0.5869	0.538449	0.986911	1.21792	1.44175	1.19664	1.35003	1.15171
48	0.423133	0.600392	0.400759	0.385882	0.526852	0.36801	0.293171	0.170176	0.298648	0.600365	0.517177	0.462834	0.476811	0.59623	0.516694	0.518939	0.370173	0.245733	0.543772	0.643449		48	0.943507	1.09392	0.921181	0.774417	0.93046	1.25367	1.02295	1.05649	1.00311	0.871457	1.48695	1.16191	0.573141	0.578422	0.749553	0.968766	1.2862	1.41037	1.33719	1.2927
49	0.47366	0.461191	0.305863	0.491311	0.585149	0.330488	0.289673	0.169729	0.296542	0.630003	0.514911	0.405416	0.330078	0.574859	0.368867	0.501823	0.323462	0.296602	0.561367	0.477778		49	1.08606	0.983362	0.802586	0.809213	0.820741	1.24944	1.0477	0.957801	0.958015	1.02178	1.26392	1.06182	0.625511	0.522427	0.631251	0.921047	1.25249	1.57594	1.41194	1.00428
50	0.505659	0.473562	0.474605	0.430245	0.384435	0.316993	0.311148	0.186206	0.253865	0.575989	0.704193	0.524395	0.50347	0.608461	0.501473	0.544319	0.301991	0.507226	0.684555	0.535235		50	0.960932	0.767254	0.885258	0.726985	0.94658	1.66443	1.18473	0.980713	0.996199	1.12469	1.38095	1.28058	0.738653	0.512856	0.590999	1.24537	1.49491	1.51685	1.50446	0.818211
51	0.455091	0.531427	0.435249	0.450125	0.6192	0.32404	0.283374	0.177477	0.252654	0.523166	0.64012	0.501302	0.498974	0.588423	0.607958	0.552575	0.348013	0.212549	0.579027	0.549335		51	0.952908	0.917824	0.892136	0.739551	0.823067	1.06335	1.32179	0.986308	0.991111	1.03424	1.53033	1.21589	0.646631	0.552052	1.01418	1.26142	1.14231	1.14218	1.25194	1.17504
52	0.550374	0.425178	0.416121	0.611156	0.512667	0.315555	0.277	0.174872	0.246056	0.512928	0.752959	0.427138	0.511856	0.5238	0.579231	0.616601	0.381647	0.296439	0.513653	0.503787		52	1.12295	0.81096	0.853684	0.789729	0.74246	1.00776	1.20997	1.06896	1.05943	1.26783	1.49563	1.34381	0.858444	0.563918	0.841828	1.26681	1.09901	1.1542	1.28738	1.16396
53	0.476261	0.503603	0.442588	0.447113	0.682385	0.264454	0.36241	0.167037	0.254962	0.505807	0.655602	0.459913	0.452936	0.630696	0.436871	0.565925	0.61321	0.319113	0.515402	0.651022		53	1.01481	0.861373	0.654724	0.676027	0.706499	0.926305	1.13442	1.05948	1.0948	1.18954	1.41074	1.31246	1.0479	0.573529	0.504506	0.756647	1.48386	1.67643	1.37653	1.42401
54	0.617805	0.342528	0.42717	0.615486	0.587622	0.261237	0.311376	0.167543	0.252977	0.527287	0.621174	0.496469	0.581475	0.701009	0.508992	0.514078	0.499873	0.370581	0.601903	0.670796		54	0.989513	0.883258	0.720561	0.752776	0.71008	1.05261	1.0799	1.0992	1.0341	1.05218	1.27234	1.2598	0.74368	0.54227	0.804736	0.77124	1.00139	1.16654	1.70426	1.09142
55	0.418646	0.440881	0.406981	0.418371	0.590427	0.291494	0.343456	0.173096	0.254016	0.52494	0.585309	0.496294	0.560755	0.633563	0.480155	0.562814	0.621636	0.464886	0.551812	0.634612		55	0.836465	1.09579	0.797772	0.851362	0.729882	0.80772	1.17739	1.07576	1.10196	0.899988	1.23453	1.08172	0.86428	0.603333	1.03671	1.1724	0.968072	1.21421	1.14736	1.19574
56	0.561371	0.326132	0.327007	0.454247	0.534737	0.344095	0.359009	0.190058	0.279993	0.554692	0.557718	0.66466	0.503348	0.509671	0.474625	0.559568	0.576206	0.308104	0.516728	0.595324		56	1.00162	0.742135	0.663704	0.768074	0.764824	1.0485	1.19132	1.08294	1.22025	0.804372	0.965192	1.15903	0.889648	0.655258	0.761612	1.05558	1.16022	1.05277	1.08489	0.932947
57	0.610095	0.509713	0.410812	0.462518	0.526559	0.329444	0.40075	0.178936	0.249398	0.491198	0.629764	0.600663	0.599443	0.401121	0.271731	0.403988	0.523258	0.370314	0.585718	0.594243		57	0.83434	0.714716	0.839301	0.729152	0.86383	1.15968	1.21375	1.13519	1.01571	0.804624	0.943485	1.11759	0.93674	0.6837	0.861877	1.1285	1.06021	0.89741	1.17838	0.946986
58	0.594329	0.411915	0.465229	0.457037	0.420874	0.282047	0.326228	0.197682	0.255104	0.463107	0.564033	0.588119	0.601631	0.481929	0.290851	0.510717	0.446445	0.318969	0.491694	0.664148		58	0.89406	0.646588	0.677456	0.828435	0.863614	1.13211	1.20138	1.0249	0.947954	0.89836	1.36307	1.16781	0.892222	0.573006	0.683411	1.16142	0.703653	0.911073	1.49121	1.52267
59	0.55654	0.589755	0.463379	0.495317	0.555305	0.299948	0.295552	0.18457	0.273189	0.520382	0.618689	0.49808	0.543023	0.351062	0.292143	0.613216	0.472809	0.256632	0.50372	0.580177		59	1.35591	0.776114	0.639109	0.762812	0.819013	1.04094	1.18456	0.970968	1.0198	0.761834	1.02424	1.15106	0.968581	0.708921	1.05678	1.41377	0.857267	0.687777	1.15782	1.93455
60	0.520572	0.534948	0.507351	0.395779	0.489532	0.349726	0.352443	0.174303	0.246887	0.456534	0.64647	0.564457	0.442107	0.396593	0.263449	0.429475	0.512422	0.331784	0.467522	0.665654		60	1.3649	0.627834	0.66889	0.729581	0.751432	1.20729	1.03189	1.1702	1.60493	0.839988	0.738983	1.02176	1.25187	0.968281	0.717707	1.36175	1.0501	0.652739	0.662138	1.10165
61	0.539775	0.513507	0.557749	0.507439	0.476295	0.38307	0.337395	0.179201	0.244346	0.450671	0.541235	0.597443	0.372288	0.480301	0.464261	0.579081	0.5203	0.31697	0.49676	0.62508		61	0.937535	0.656155	0.726107	0.749725	0.735382	1.02289	1.1168	1.0278	1.42764	1.06565	0.847619	0.854075	0.970371	0.79804	0.936956	0.743936	0.6351	0.878025	1.4776	1.68657
62	0.669583	0.532174	0.424505	0.244535	0.476353	0.270397	0.342001	0.16765	0.253036	0.426199	0.51752	0.570189	0.37614	0.484891	0.479522	0.445259	0.582345	0.474652	0.453142	0.62388		62	1.33392	0.671668	0.668914	0.924606	0.878255	0.962846	1.28905	1.01178	1.02431	0.850729	0.808283	1.49518	1.42623	1.05739	0.835395	1.18825	1.00071	0.623556	0.970427	1.34744
63	0.55952	0.559944	0.429222	0.39876	0.62019	0.294632	0.382076	0.187017	0.266307	0.452924	0.58684	0.470655	0.461432	0.475941	0.511827	0.394933	0.655253	0.523417	0.413275	0.601869		63	0.869982	0.583123	0.602268	0.697851	0.917187	0.989027	1.11487	0.95645	0.959618	0.81113	0.716365	0.759961	1.07444	0.753987	1.00372	1.31406	1.38333	1.01792	0.923667	1.01347
64	0.547374	0.519033	0.515472	0.448432	0.494734	0.26196	0.337458	0.179786	0.274985	0.410868	0.58096	0.463403	0.206201	0.407361	0.5401	0.515576	0.561135	0.535532	0.59403	0.555049		64	1.10777	0.585158	0.570459	0.657938	0.902648	1.36215	1.18951	0.92637	0.888169	0.807964	0.768841	0.77951	0.870341	0.798887	0.919332	1.06977	1.29267	0.654703	0.663109	1.24245
65	0.515044	0.623554	0.665914	0.563467	0.598738	0.327408	0.326577	0.185882	0.258788	0.472115	0.461236	0.212785	0.188835	0.506321	0.524746	0.409461	0.637074	0.579046	0.534324	0.639939		65	1.22311	0.560191	0.66365	0.727964	0.819442	0.974385	0.964837	0.891382	0.803664	0.856283	0.686694	0.733739	1.00746	0.547566	0.820687	1.30227	1.10759	0.931029	0.784328	1.01767
66	0.664791	0.551079	0.478505	0.687089	0.618959	0.259165	0.402733	0.166448	0.265008	0.454153	0.426822	0.184412	0.170675	0.374798	0.640601	0.603578	0.562815	0.550206	0.508208	0.579365		66	0.775845	0.559533	0.568417	0.679963	0.903347	1.07742	1.05338	0.953399	0.809951	0.66985	0.575234	1.17001	0.950799	0.784553	0.60324	1.3232	1.35781	1.17757	0.926564	1.20969
67	0.606472	0.661326	0.492821	0.645624	0.662746	0.43888	0.190121	0.205354	0.282101	0.472125	0.597392	0.42643	0.165017	0.399122	0.696285	0.60839	0.748728	0.525957	0.470579	0.57405		67	1.00244	0.580563	0.670584	0.678768	0.833774	0.973412	1.02545	1.15356	1.27643	0.872893	0.786841	0.664728	0.924626	0.841432	0.588271	1.02706	0.984702	0.785322	1.37772	1.65632
68	0.643908	0.712146	0.615671	0.622675	0.755599	0.464645	0.206876	0.198184	0.292735	0.553588	0.823868	0.326565	0.184628	0.411614	0.63771	0.707456	0.572434	0.305899	0.370104	0.554701		68	1.44304	0.634535	0.603257	0.744718	0.948663	1.07144	1.24285	1.34864	1.07637	0.789845	0.709397	0.780896	0.74973	0.844836	1.15743	1.00029	0.886175	0.748538	1.05351	1.20482
69	0.697399	0.655032	0.594145	0.718856	0.527957	0.443364	0.188007	0.184074	0.272895	0.527165	0.54875	0.391956	0.141045	0.542477	0.654017	0.58149	0.603225	0.308553	0.294547	0.477306		69	0.81124	0.508281	0.602172	0.782833	0.978779	1.17664	1.21843	0.945138	1.66529	0.917047	0.782191	0.777041	1.07184	1.50011	0.882032	0.890278	0.818137	0.817248	1.08087	1.15026
70	0.60284	0.700817	0.659089	0.679542	0.55824	0.444285	0.168537	0.202999	0.295729	0.500034	0.604104	0.398345	0.245924	0.486648	0.662983	0.576473	0.594927	0.352829	0.221371	0.396554		70	0.758202	0.552384	0.689788	0.827972	0.90253	1.00772	1.07532	0.860719	0.906328	0.769454	0.723596	1.10589	1.25168	1.06988	0.566706	1.33107	1.38998	1.08993	1.46508	1.36783
71	0.686604	0.607054	0.550047	0.642474	0.585317	0.395737	0.189989	0.193195	0.27599	0.518754	0.508435	0.511435	0.666094	0.609971	0.745585	0.581607	0.50008	0.303848	0.142005	0.372634		71	0.765704	0.529917	0.7122	0.755582	1.04376	1.48769	0.852621	1.16829	0.845945	0.849503	0.829509	0.913333	1.13872	0.604842	0.911601	1.32952	0.870925	1.12302	1.28561	1.31126
72	0.604579	0.543088	0.404271	0.675433	0.559441	0.440578	0.164477	0.199171	0.305302	0.589472	0.598925	0.662169	0.449387	0.68534	0.676685	0.483682	0.52389	0.318601	0.214751	0.376788		72	0.982645	0.560798	0.668768	0.86696	1.1181	1.0474	1.10451	0.86092	0.997363	0.871127	0.977386	0.860836	1.16646	0.732681	1.20909	1.00724	1.21042	1.12333	0.940134	0.964749
73	0.487568	0.594392	0.48675	0.578333	0.626281	0.408932	0.17498	0.199264	0.28228	0.538274	0.655603	0.70631	0.711396	0.650854	0.606019	0.534028	0.488762	0.3771	0.214574	0.337001		73	0.6821	0.548221	0.685863	0.824446	1.23456	1.23696	0.989348	1.08363	1.15664	0.964959	1.11794	0.99656	1.02931	0.585123	1.27357	1.45614	1.43591	1.14306	1.32131	1.02
74	0.568411	0.592201	0.395831	0.536809	0.398516	0.376653	0.167993	0.204057	0.264912	0.507445	0.546913	0.62277	0.6943	0.765088	0.640036	0.523987	0.455389	0.277321	0.174795	0.433929		74	0.88456	0.527524	0.688711	0.945806	1.06351	1.17672	0.995779	1.00437	0.996435	0.880904	1.05115	1.26981	0.996655	0.621889	0.844918	0.978849	1.49188	1.29784	1.29681	1.48882
75	0.581506	0.471501	0.541038	0.562855	0.423687	0.412723	0.194862	0.182701	0.25841	0.533282	0.591603	0.730043	0.724499	0.802327	0.617761	0.558874	0.403561	0.276818	0.340078	0.483232		75	0.814065	0.541539	0.844022	0.999311	1.4631	0.9637	0.989593	0.74552	0.987261	0.874339	0.85652	1.25514	0.864612	0.553604	1.40542	1.31768	1.17443	1.29981	1.24089	1.52224
76	0.673186	0.863687	0.700167	0.397726	0.415474	0.374607	0.146123	0.173991	0.252385	0.608143	0.641018	0.626297	0.655748	0.695677	0.458896	0.515568	0.417332	0.604769	0.462336	0.568766		76	0.839323	0.636085	1.04461	1.29909	1.74226	1.42473	0.921599	0.864374	1.26645	0.903998	0.935382	1.33135	0.961591	0.649173	0.960594	1.11171	1.00279	0.991819	1.1522	1.31821
77	0.552969	0.698902	0.559692	0.469519	0.440525	0.351253	0.134241	0.151698	0.222264	0.510224	0.670102	0.639672	0.612741	0.784289	0.422988	0.579194	0.612374	0.566506	0.439462	0.476735		77	0.909863	0.757187	0.978668	1.33349	1.48255	1.34498	0.928363	0.96408	1.37873	0.997785	1.17373	1.22863	0.738304	1.2219	1.04337	1.51299	1.24407	1.18613	1.18156	1.09348
78	0.644326	0.808756	0.64556	0.480061	0.414877	0.287878	0.155697	0.171727	0.191363	0.493931	0.559887	0.600786	0.714565	0.782115	0.534221	0.576206	0.629631	0.537959	0.365368	0.602771		78	0.707179	0.754771	0.911704	1.31751	1.68812	1.65582	1.20911	0.912686	1.34068	1.10062	1.50493	1.21484	0.626768	1.07774	1.23264	1.4148	1.34493	1.39997	1.36554	1.09362
79	0.872532	0.372259	0.530215	0.362228	0.394562	0.321891	0.149516	0.14125	0.211041	0.461054	0.657422	0.630268	0.722948	0.743198	0.699611	0.526208	0.442889	0.463825	0.502023	0.536011		79	0.789814	0.734266	0.748007	0.823433	1.06376	1.35451	1.15863	0.89204	0.971813	1.08963	1.60003	1.0575	0.957249	0.831686	0.961299	1.39916	1.18886	1.38988	1.56267	1.33831
80	0.627537	0.643081	0.390848	0.464399	0.398713	0.374892	0.13166	0.143575	0.207094	0.472965	0.669231	0.571444	0.731972	0.730393	0.512421	0.627561	0.657225	0.534403	0.615091	0.606924		80	0.824454	0.728713	0.886643	1.02183	1.13294	1.30265	1.0281	0.8439	1.08606	1.31654	1.71735	1.16839	0.760377	1.02627	1.47751	1.47222	1.28842	1.29527	1.35029	0.880136
81	0.555548	0.454223	0.597158	0.378801	0.435018	0.300968	0.138782	0.155415	0.198632	0.417543	0.620625	0.686533	0.701145	0.758871	0.534825	0.373475	0.535114	0.373156	0.468879	0.585551		81	1.08724	0.692441	0.87002	0.876006	1.06429	1.13325	1.04416	1.2095	1.19698	1.006	1.63102	1.11223	0.762147	1.16381	1.21338	1.46451	1.06773	0.941769	1.15416	0.985224
82	0.652896	0.660868	0.566417	0.392721	0.37726	0.322531	0.138893	0.157628	0.224911	0.442084	0.639843	0.618751	0.700798	0.659105	0.633424	0.541725	0.511927	0.454611	0.498294	0.630894		82	0.810927	0.75917	0.777972	0.950671	1.19663	1.43512	1.01877	1.36407	0.972681	0.793904	1.28113	1.11038	0.769053	1.19107	1.44589	1.44747	1.33052	1.36091	1.23899	0.963049
83	0.721679	0.499435	0.621832	0.374979	0.321888	0.308556	0.141942	0.149076	0.218799	0.49886	0.705314	0.55227	0.659008	0.705857	0.591901	0.485728	0.457214	0.403811	0.51163	0.705059		83	0.947546	0.697412	0.862524	0.901026	1.0306	1.08141	0.874239	1.1213	0.837758	0.965636	1.20897	1.23774	0.817048	1.13552	1.07622	1.50726	1.48853	1.20927	0.994455	0.832892
84	0.642459	0.742078	0.569882	0.445203	0.448399	0.259849	0.115431	0.161676	0.21921	0.451556	0.708905	0.540634	0.64747	0.724706	0.647958	0.544367	0.422855	0.367865	0.674128	0.42299		84	0.68771	0.633967	0.825157	1.10077	1.62237	1.65578	1.06256	0.853527	1.03635	1.11934	1.22193	1.17212	0.830633	1.19236	1.54159	1.446	1.3513	1.02029	0.959278	0.642032
85	0.666618	0.57944	0.4784	0.483785	0.465786	0.320187	0.131382	0.151942	0.214144	0.483979	0.576289	0.532767	0.587712	0.680647	0.566056	0.493503	0.365937	0.327212	0.495262	0.604098		85	0.588007	0.504438	0.840836	1.12167	1.63526	1.18009	0.961202	0.980688	1.25234	1.09887	1.31285	1.26647	0.86875	1.25614	1.54785	1.51185	1.34095	1.13876	1.13056	0.755079
86	0.539418	0.676615	0.498732	0.514896	0.371811	0.308629	0.128791	0.167193	0.187733	0.494781	0.647184	0.578121	0.752912	0.598711	0.572696	0.492237	0.381204	0.532283	0.498622	0.417395		86	0.49341	0.477926	0.691223	0.98122	1.20827	1.1199	1.13927	1.03813	1.09492	1.23725	1.1956	1.22777	0.89142	0.861877	1.21741	1.36691	1.29345	1.46633	1.11696	0.619423
87	0.628787	0.955492	0.485752	0.500187	0.383462	0.275633	0.134435	0.169618	0.205142	0.399283	0.536919	0.570178	0.621883	0.716811	0.499889	0.621572	0.459232	0.50556	0.411067	0.701528		87	0.589363	0.535895	0.64796	0.890428	1.02922	1.24191	1.19648	1.24973	1.08257	1.06472	0.9464	1.03423	0.867997	0.948629	1.04516	1.12652	1.38158	1.29738	1.0201	0.75108
88	0.619177	0.805035	0.502415	0.494362	0.523296	0.329847	0.159298	0.144174	0.19775	0.429816	0.499682	0.647617	0.626538	0.722429	0.634724	0.45408	0.493083	0.618039	0.400158	0.605981		88	0.486698	0.521003	0.690395	1.13759	1.29606	1.50343	1.19086	1.05175	1.0776	0.959543	1.12808	1.10047	0.983799	1.25636	1.32397	1.33062	1.22994	1.29574	1.18068	0.536836
89	0.826237	0.64488	0.501475	0.425921	0.582986	0.266904	0.133439	0.178952	0.184107	0.412182	0.584324	0.581371	0.681854	0.739578	0.538792	0.48314	0.536367	0.488053	0.410316	0.611017		89	0.538465	0.695465	0.67947	0.951584	1.17598	1.34129	1.04335	1.3117	1.20853	1.35095	1.0846	1.23775	0.839496	1.00667	1.428	1.49881	1.52641	1.19327	1.05043	0.600495
90	0.757214	0.513491	0.454886	0.376152	0.428629	0.260943	0.144059	0.200541	0.19981	0.400729	0.46019	0.675375	0.603738	0.554296	0.593377	0.57726	0.74329	0.743496	0.715576	0.463466		90	0.511671	0.694034	0.81092	0.972741	1.2009	1.29029	1.0508	1.2098	1.50734	1.54438	1.43981	1.01385	0.868138	1.03647	1.03763	1.45761	1.61466	1.31945	0.723631	0.497749
91	0.452601	0.468872	0.545738	0.462948	0.476044	0.222618	0.139858	0.192558	0.206781	0.468459	0.480186	0.516481	0.653267	0.571304	0.608602	0.481898	0.552023	0.448738	0.609213	0.323975		91	0.558906	0.840338	0.804856	0.881312	0.978756	1.21353	1.1443	1.123	1.54573	1.45615	1.14213	0.992748	0.93955	1.1764	1.15906	1.16968	1.53488	1.24402	0.995203	0.626306
92	0.568185	0.561022	0.373142	0.388699	0.409558	0.197674	0.161405	0.203224	0.20672	0.453552	0.617225	0.623723	0.547648	0.540483	0.614289	0.62682	0.5902	0.635174	0.922656	0.924389		92	0.506849	0.828048	0.835998	0.892108	0.962318	1.48592	1.06454	1.22999	1.44167	1.57885	1.08045	1.15946	0.97373	1.11687	1.03559	1.10068	1.02151	1.15149	0.589087	0.455452
93	0.513795	1.22058	0.518993	0.453103	0.441267	0.250011	0.13896	0.222349	0.225857	0.434789	0.716682	0.641633	0.5516	0.535728	0.665769	0.71095	0.622849	0.55054	0.249094	0.00848583		93	0.509962	0.799335	0.911969	0.956039	1.18212	1.3195	1.50866	1.49824	1.29511	1.29921	1.01688	1.27189	0.946228	1.17704	0.939156	1.28519	0.993331	1.26068	0.958518	0.540907
94	0.659369	0.605769	0.53982	0.577031	0.660579	0.39604	0.132487	0.147818	0.224283	0.511244	0.739838	0.561853	0.581011	0.609957	0.585783	0.540241	0.544507	0.740433	0.466919	0.43347		94	0.554487	0.669793	0.878687	1.12894	1.25568	1.02021	1.21246	1.51168	1.55811	1.05558	1.57002	1.18051	0.924346	1.34462	1.109	0.870005	1.0835	1.45456	1.05522	0.509888
95	0.611535	0.722452	0.500491	0.590091	0.594597	0.424127	0.104757	0.175827	0.207032	0.682935	0.733574	0.657597	0.760698	0.549827	0.479724	0.431988	0.513656	0.391986	0.296374	0.368852		95	0.481371	0.524272	0.690634	0.855386	1.07563	1.02728	1.05734	1.5587	1.22137	1.27027	1.26981	1.29449	1.04896	1.28923	1.29887	1.15051	1.29203	1.44125	1.09826	0.605688
96	0.591929	0.599757	0.569613	0.585536	0.504756	0.484956	0.146456	0.140348	0.299872	0.73615	0.619495	0.511399	0.585589	0.579133	0.463224	0.507337	0.608916	0.683102	0.686014	0.417928		96	0.495299	0.51138	0.79895	0.728698	0.905124	1.17003	0.817013	1.24175	1.8147	1.02962	1.04596	1.04166	0.965399	1.44349	1.70927	1.08878	1.16875	1.19149	1.13454	0.625023
97	0.730092	0.574908	0.547961	0.66296	0.611322	0.375941	0.149198	0.169141	0.220115	0.697804	0.633384	0.560809	0.503663	0.57005	0.538979	0.670971	0.653289	0.726501	0.465703	0.661841		97	0.459827	0.56934	0.851126	0.786491	0.965748	0.888909	1.06237	1.53654	0.860448	1.43884	1.02196	1.17202	1.03727	0.802416	0.887882	1.21978	1.07101	1.02068	1.28463	0.858612
98	0.713806	0.714018	0.625937	0.643235	0.559049	0.388529	0.156886	0.15389	0.185075	0.685866	0.63426	0.565938	0.596441	0.328145	0.457022	0.574503	0.605632	0.704964	0.555071	0.458962		98	0.497413	0.628457	0.960462	1.17678	1.20878	0.971648	1.0967	1.61808	1.05303	1.24037	1.29065	0.98581	0.954457	0.726786	1.13892	1.2863	1.00858	0.938691	0.696808	0.509029
99	0.59327	0.742459	0.577421	0.621634	0.431697	0.288955	0.163832	0.168466	0.204061	0.614619	0.622939	0.473888	0.609098	0.636939	0.460918	0.468776	0.620412	0.604287	0.524895	0.488434		99	0.562413	0.939266	0.967455	1.29014	1.30298	1.36119	1.00024	0.830772	1.07815	1.20065	1.3294	0.983922	1.11231	1.40926	1.40555	1.20227	0.884266	0.891461	0.785958	0.486186
100	0.41188	0.745567	0.652911	0.600776	0.478889	0.326243	0.175034	0.129583	0.20368	0.645528	0.601062	0.590646	0.677238	0.65255	0.579753	0.60992	0.554582	0.521179	0.486767	0.372991		100	0.479586	0.562699	0.788851	1.04805	1.02685	1.03144	1.14429	0.958812	0.940558	0.846896	1.32705	1.02081	1.18823	1.39031	1.24113	1.4269	1.15794	1.16004	1.3112	0.484896
101	0.187026	0.678011	0.699402	0.50697	0.493692	0.347113	0.193581	0.128491	0.207655	0.6841	0.631929	0.601527	0.699979	0.780542	0.630391	0.819765	0.872486	0.56317	0.405432	0.332976		101	0.453322	0.528747	0.848711	1.10148	1.47596	1.26787	0.961002	1.01061	0.984718	1.08595	0.952031	0.912551	0.980309	1.24067	1.05426	1.31227	1.26297	1.5208	1.51234	0.964676
102	0.666748	0.551719	0.63735	0.410934	0.438694	0.330198	0.216639	0.15492	0.237421	0.663598	0.59464	0.628985	0.63681	0.590042	0.610999	0.717597	0.72785	0.481367	0.502137	0.295452		102	0.468946	0.666406	1.03168	1.01745	1.38059	1.09141	1.17532	0.901977	1.06474	1.45614	0.954824	0.754465	0.889466	1.37366	1.28232	1.20576	0.991648	1.02362	0.580085	0.465108
103	0.586536	0.57125	0.517087	0.411625	0.226488	0.37983	0.185457	0.156967	0.213321	0.651665	0.643072	0.567193	0.607794	0.641105	0.53821	0.791586	0.670283	0.853462	0.56222	0.438044		103	0.550915	0.984613	1.00021	1.08939	1.75414	1.315	1.00025	1.20795	1.01764	1.45344	0.8005	0.840215	1.06748	1.29441	0.991749	0.798032	1.25624	1.52392	1.08531	0.471638
104	0.759583	0.570822	0.482519	0.291833	0.329935	0.370273	0.142448	0.121672	0.187651	0.513989	0.665857	0.460671	0.661094	0.724426	0.573542	0.7199	0.757328	0.605139	0.462956	0.654243		104	0.503486	0.863494	1.05081	0.974875	1.36168	1.7132	1.16429	0.856791	1.16379	1.61132	1.33346	0.779827	0.811677	1.43629	1.42269	1.06571	1.11555	1.14833	0.705954	0.570833
105	0.669736	0.576632	0.554344	0.320448	0.3297	0.413444	0.227359	0.115941	0.166884	0.524144	0.582491	0.525796	0.618871	0.657802	0.653984	0.765325	0.702977	0.63274	0.520374	0.435356		105	0.516858	0.765177	1.02357	1.22161	1.0107	1.5498	0.993669	0.901829	1.22069	1.85773	1.29368	0.830077	0.883533	1.13425	1.36452	1.18705	1.26871	1.14703	1.23776	0.665919
106	0.547557	0.650123	0.509657	0.391266	0.32821	0.408883	0.256788	0.110202	0.159338	0.538787	0.558164	0.54644	0.61996	0.706564	0.541262	0.743854	0.625834	0.721114	0.557285	0.371178		106	0.504944	0.673189	0.959622	1.12544	1.06182	1.30931	0.99303	0.870074	0.893442	1.28934	1.49437	1.074	1.07301	1.34633	1.30164	1.5704	1.45167	1.16796	0.873394	0.671835
107	0.519836	0.599961	0.456997	0.363894	0.45296	0.360095	0.422848	0.299916	0.197944	0.663018	0.534892	0.643216	0.56559	0.599986	0.619132	0.707895	0.507777	0.53301	0.587778	0.336168		107	0.577473	0.655493	0.710707	0.968938	1.28124	1.07935	0.893436	1.029	0.890293	1.27871	1.1824	0.846583	1.04849	1.35427	1.58079	1.48778	1.11611	1.17549	0.951593	0.573009
108	0.580286	0.490872	0.489233	0.591414	0.365471	0.405288	0.302179	0.127906	0.2134	0.401119	0.701687	0.511786	0.677112	0.495297	0.621996	0.762602	0.748713	0.534377	0.66038	0.395683		108	0.557774	0.845113	0.856828	0.975167	0.958858	1.12316	1.3781	1.08543	0.978089	1.08498	1.08516	0.785715	0.858196	1.37354	1.49598	1.12827	1.28326	1.31861	0.957093	0.675919
109	0.474685	0.437851	0.376533	0.432353	0.415936	0.40766	0.302025	0.0748026	0.174377	0.290704	0.516118	0.615158	0.578233	0.608125	0.509291	0.724469	0.604769	0.678594	0.451314	0.603246		109	0.672819	0.803011	0.935827	0.870913	1.29689	1.38307	1.03276	0.893648	0.941552	1.20463	0.767348	0.700415	1.03106	1.40663	1.2589	1.44475	1.11395	1.44562	1.37115	0.6971
110	0.426482	0.558148	0.514299	0.524883	0.358592	0.419564	0.301433	0.16622	0.216403	0.486151	0.72465	0.660215	0.576936	0.502614	0.583987	0.821754	0.463344	0.627294	0.497488	0.375101		110	0.650117	0.724884	0.855753	0.912221	1.41724	1.32772	1.39712	0.895091	0.973533	1.23947	0.826695	0.715506	0.928641	1.08394	1.33635	1.42299	1.44126	1.28912	1.21956	0.669121
111	0.524802	0.490774	0.44553	0.494783	0.435484	0.453365	0.364065	0.279677	0.201742	0.471933	0.78074	0.508978	0.699708	0.228301	0.740577	0.652329	0.6363	0.541219	0.563238	0.357765		111	0.634231	0.863693	0.822882	0.766634	1.16844	1.54289	1.20243	1.05831	0.810172	1.06246	1.01988	0.658577	0.875742	1.26558	1.34865	1.42135	1.42269	1.19815	0.916198	0.57678
112	0.586196	0.321069	0.640051	0.520978	0.481155	0.419767	0.314919	0.194354	0.203647	0.469926	0.5834	0.583528	0.642008	0.555938	0.759507	0.719221	0.525368	0.544543	0.506354	0.499945		112	0.735824	1.02567	0.920458	1.01354	1.33614	1.17672	0.850353	0.978863	0.939687	1.06784	1.05046	0.710143	0.943682	1.42594	1.1002	1.5435	1.49387	1.23008	0.890921	0.760773
113	0.482274	0.389875	0.486914	0.57375	0.483503	0.395802	0.286291	0.120666	0.194425	0.337776	0.647455	0.567602	0.551667	0.673091	0.669403	0.689979	0.593001	0.597052	0.48352	0.529115		113	0.616649	0.953654	0.816538	1.10431	1.1632	1.15017	1.38767	0.936902	0.934285	0.994354	0.756247	0.757647	0.93852	1.29594	1.28264	1.5146	1.47582	1.21564	1.00162	0.555538
114	0.526636	0.436993	0.514336	0.472182	0.423215	0.504996	0.290179	0.168034	0.246924	0.495475	0.605334	0.618592	0.518099	0.589792	0.692507	0.696266	0.637592	0.596294	0.730633	0.526506		114	0.569712	0.926287	0.830163	1.21605	1.64351	1.50037	1.08152	0.966255	0.989929	1.07908	1.02757	0.760942	0.931486	1.26213	1.24971	1.41287	1.41212	1.10842	0.857666	0.685333
115	0.536218	0.530649	0.503975	0.508468	0.418212	0.341522	0.252775	0.14159	0.258399	0.414421	0.553433	0.620665	0.569601	0.621112	0.651407	0.589982	0.478676	0.602895	0.471374	0.486689		115	0.589004	0.717297	0.870843	1.08546	1.30629	1.63981	1.41148	1.11327	0.913354	0.923834	1.21855	0.79479	1.0187	1.161	0.998449	1.3944	1.45494	1.07443	0.846464	0.561341
116	0.4682	0.531817	0.490814	0.54842	0.445878	0.400934	0.301084	0.207137	0.229859	0.436618	0.723137	0.583476	0.659181	0.549116	0.649873	0.631312	0.526326	0.595719	0.295092	0.465939		116	0.587666	0.700479	0.936843	0.996452	1.19342	1.58023	1.33851	1.05585	1.02965	1.09786	1.1157	0.873599	0.946108	1.17034	1.33996	1.50544	1.35019	1.033	0.908012	0.650234
117	0.590031	0.60296	0.32067	0.477495	0.456081	0.346515	0.3035	0.169315	0.210086	0.507234	0.570306	0.597915	0.662109	0.522937	0.694306	0.683724	0.580136	0.458394	0.443588	0.402939		117	0.696015	0.85129	0.788411	0.909653	1.41045	1.34598	1.32211	1.40059	1.03255	1.13513	1.31868	0.915171	0.926211	1.23999	1.2685	1.46335	1.45045	0.977407	0.80194	0.666562
118	0.585734	0.445715	0.480996	0.442231	0.528718	0.329762	0.254254	0.132413	0.202339	0.49309	0.621098	0.587893	0.559813	0.685144	0.808701	0.694633	0.607524	0.367352	0.503255	0.517877		118	0.635017	0.699961	0.675121	0.948595	1.27748	1.43242	1.23728	1.2892	0.980154	0.979692	1.19863	0.995314	1.18235	1.13692	1.17552	1.30055	1.38303	0.987601	0.889334	0.592914
119	0.511278	0.479624	0.540693	0.468205	0.473431	0.336238	0.234023	0.159029	0.244316	0.523439	0.660408	0.593962	0.594979	0.548344	0.585875	0.681481	0.518775	0.460214	0.486763	0.600564		119	0.519175	0.681594	0.633575	0.847332	1.32067	1.44242	1.38065	1.25734	0.866108	1.17709	1.02669	0.800239	0.948074	1.25285	1.21767	1.28126	1.17635	0.932155	0.679847	0.504291
120	0.439386	0.474006	0.459163	0.616507	0.457555	0.344433	0.153752	0.163627	0.197435	0.455115	0.676362	0.61338	0.62447	0.473511	0.69469	0.812509	0.448815	0.373886	0.670091	0.47572		120	0.692875	0.734571	0.782669	1.14662	1.41374	1.54911	1.40678	1.49784	0.985354	1.03788	1.37655	1.05209	0.853496	1.11132	1.15867	1.4023	1.28199	0.870519	0.637044	0.571835
121	0.551763	0.448067	0.553547	0.468427	0.535452	0.377989	0.259963	0.113469	0.264457	0.560581	0.624895	0.529614	0.708301	0.637509	0.61832	0.694478	0.502952	0.3827	0.579589	0.321342		121	0.703623	0.920183	0.902869	0.880806	1.1002	1.30582	1.19501	1.38033	1.19346	1.22515	1.22106	0.996404	1.0253	1.23375	1.20675	1.42478	1.22038	1.0086	0.731581	0.552912
122	0.551151	0.499091	0.515997	0.528537	0.487709	0.374319	0.234129	0.154549	0.192006	0.528517	0.661303	0.609695	0.642513	0.578794	0.536421	0.64369	0.521323	0.52341	0.457875	0.323553		122	0.678141	0.77987	0.944502	0.868105	1.21414	1.41087	1.28791	1.54896	1.23118	1.14035	1.18059	0.820711	1.02328	1.29948	1.19726	1.3496	1.10087	1.04235	0.758198	0.721214
123	0.559818	0.530362	0.557248	0.414976	0.487271	0.356339	0.225607	0.172486	0.29032	0.550362	0.588511	0.547881	0.639875	0.640068	0.608293	0.686734	0.488209	0.364538	0.527275	0.285103		123	0.500274	0.754952	0.924859	0.932662	1.32437	1.2315	1.56694	1.51824	1.51255	1.16643	1.20741	0.745457	1.00874	1.32271	1.13747	1.14561	1.17914	1.00862	0.948036	0.561866
124	0.550608	0.505537	0.5085	0.52122	0.38682	0.33975	0.184374	0.144892	0.270634	0.580595	0.590242	0.504412	0.654927	0.605372	0.510022	0.728749	0.512733	0.603991	0.474682	0.376128		124	0.623884	0.792669	0.990056	1.12502	1.22388	1.5773	1.1541	0.932926	1.46862	1.17127	1.36993	0.995497	1.13851	1.05536	1.23363	1.27502	1.15514	1.07402	0.93399	0.623419
125	0.54186	0.391594	0.415457	0.412683	0.32449	0.351513	0.2757	0.185076	0.278702	0.646052	0.576807	0.512017	0.63945	0.374973	0.649901	0.56235	0.365682	0.540696	0.461227	0.416386		125	0.623999	0.806954	0.824441	0.945912	1.40642	1.17005	0.985751	1.07869	1.5035	1.40216	1.26051	0.814927	1.15979	1.22938	1.15891	0.990198	1.19868	1.14041	0.949957	0.588039
126	0.788609	0.434804	0.447195	0.413746	0.406904	0.360752	0.213758	0.16054	0.344998	0.558569	0.680162	0.5286	0.463285	0.57979	0.699726	0.676576	0.474587	0.565818	0.463635	0.603771		126	0.66469	0.770216	0.816611	0.933692	1.33381	1.43674	1.4312	1.32116	1.00347	1.23726	1.01358	0.888097	1.35174	1.01485	1.12299	1.38289	1.20749	1.02401	1.05217	0.739892
127	0.546711	0.477112	0.484238	0.512349	0.542583	0.402997	0.213741	0.17627	0.171891	0.522805	0.409604	0.613034	0.584739	0.775291	0.718677	0.737506	0.479446	0.539088	0.642159	0.131505		127	0.604822	0.619801	0.693039	0.986312	1.25819	1.4066	1.28697	1.46621	1.37755	1.25433	0.798826	1.07291	0.896876	1.33641	1.15575	1.08627	1.09681	0.889034	0.595518	0.57667
128	0.655842	0.499454	0.449471	0.43697	0.473094	0.444283	0.222301	0.239209	0.212888	0.50302	0.67101	0.55786	0.634422	0.636527	0.695936	0.670219	0.522413	0.571253	0.401113	0.295784		128	0.675566	0.747454	0.838713	1.25295	1.32331	1.56705	1.46634	1.39137	1.36463	1.16482	1.41968	0.929174	0.81533	1.29643	1.25018	1.05509	1.00302	0.887467	0.712272	0.556969
129	0.467356	0.566077	0.483683	0.48074	0.497604	0.415132	0.221752	0.229757	0.235387	0.524581	0.515255	0.587095	0.606695	0.640697	0.767688	0.738886	0.373722	0.557289	0.505558	0.518171		129	0.729332	0.794525	0.840478	1.0639	1.23381	1.59544	1.66649	1.3669	1.21153	1.33992	1.36964	1.04069	0.940984	1.33821	1.17696	1.26041	1.01451	0.808035	0.729153	0.589359
130	0.544671	0.545848	0.49386	0.50799	0.539605	0.400113	0.268514	0.238892	0.251892	0.510368	0.556104	0.363037	0.707859	0.652004	0.716912	0.677446	0.5215	0.451608	0.540002	0.416294		130	0.703905	0.80401	0.818402	1.13601	1.04483	1.45145	1.52771	1.56494	1.35902	1.32514	1.32066	0.938363	0.958846	1.20066	1.14769	1.14681	0.877905	0.967619	0.885484	0.71089
131	0.522084	0.464694	0.460856	0.494846	0.455506	0.410447	0.28393	0.259676	0.259045	0.541593	0.457859	0.533184	0.6458	0.608546	0.709137	0.697563	0.519516	0.335453	0.706985	0.357279		131	0.74909	0.739881	0.799746	1.01666	1.57515	1.50877	1.25251	1.29469	1.30784	1.58139	1.3059	0.813323	1.03754	1.37963	1.39148	1.28659	1.0417	0.835472	0.83537	0.577306
132	0.499841	0.459745	0.473474	0.525039	0.419284	0.358539	0.256542	0.220593	0.287525	0.524908	0.709412	0.524615	0.49028	0.624986	0.650431	0.769612	0.571675	0.385679	0.51339	0.466515		132	0.676574	0.742824	0.797373	0.939288	1.44685	1.28656	1.09289	1.18932	1.10913	1.45697	1.24696	0.903504	1.18035	1.37012	1.24589	1.31357	1.01692	0.802074	0.900523	0.702889
133	0.497104	0.491541	0.559624	0.392151	0.475518	0.363206	0.286825	0.231781	0.255109	0.447488	0.553134	0.559372	0.574592	0.630178	0.580415	0.746332	0.58417	0.30071	0.603463	0.383742		133	0.618421	0.724298	0.835568	0.82612	1.0655	0.928629	0.942963	1.16096	1.31398	1.30255	1.20842	0.940288	1.16044	1.33037	1.19968	1.01082	0.988445	0.854498	0.81531	0.620744
134	0.478993	0.448305	0.479118	0.344529	0.488157	0.367575	0.248995	0.220855	0.284235	0.541327	0.658687	0.456856	0.600638	0.65841	0.557177	0.677244	0.611133	0.482621	0.55689	0.397285		134	0.791274	0.79933	0.923627	1.42618	1.72881	1.43266	0.927357	1.47479	1.4402	1.25747	1.04543	0.850821	1.15464	1.28092	1.1996	0.893827	0.988521	0.84883	0.652166	0.590227
135	0.273103	0.517427	0.40464	0.529007	0.449769	0.37515	0.200375	0.211765	0.265183	0.424994	0.747607	0.569243	0.668216	0.559739	0.616898	0.703354	0.467458	0.442194	0.431237	0.489835		135	0.638805	0.757392	0.859784	1.23033	1.52907	1.36812	1.20986	1.33697	1.21036	1.27497	1.14933	0.928681	1.15881	1.25648	1.19821	0.895118	0.906522	0.807273	0.62668	0.530726
136	0.347007	0.465254	0.478952	0.416733	0.520567	0.34648	0.227862	0.231528	0.321744	0.547716	0.698746	0.557215	0.485722	0.685828	0.433368	0.746772	0.514186	0.363779	0.434859	0.418736		136	0.685402	0.645674	0.710844	1.27451	1.47176	1.37538	1.12765	1.24748	1.22943	1.52135	1.37394	0.916469	0.998983	1.28035	1.18643	0.951878	0.91793	0.855322	0.528409	0.559068
137	0.426052	0.415291	0.457378	0.510458	0.313382	0.326977	0.272817	0.222823	0.344574	0.581014	0.736607	0.565594	0.516737	0.685822	0.589266	0.688309	0.537132	0.376963	0.521012	0.528692		137	0.677321	0.643572	0.74825	1.08679	1.49387	1.36734	1.35521	1.41859	1.37672	1.64382	1.14626	0.799571	0.969156	1.42088	1.26568	1.30858	1.22892	0.78763	0.534984	0.661998
138	0.436125	0.437476	0.428635	0.457223	0.359837	0.312047	0.208053	0.159407	0.295401	0.517266	0.802787	0.553203	0.504402	0.663682	0.554305	0.641436	0.644917	0.340052	0.387638	0.438749		138	0.772384	0.604718	0.584801	1.3042	1.35923	1.29402	1.30388	1.51115	1.41669	1.22275	1.07306	0.837323	1.3293	1.28676	1.24424	1.20395	1.16565	0.889996	0.873683	0.51778
139	0.478428	0.472007	0.337798	0.475838	0.427716	0.38274	0.268883	0.24232	0.309367	0.605607	0.722025	0.535597	0.624668	0.644006	0.553713	0.647937	0.596084	0.423831	0.403078	0.297653		139	0.721904	0.896099	0.717229	1.09589	1.16013	1.29574	1.23893	1.46453	1.00956	1.20458	0.888234	0.949139	1.03151	1.28797	1.15894	1.04568	1.10777	0.830462	0.548094	0.796255
140	0.57695	0.327545	0.472235	0.41194	0.375987	0.32	0.188837	0.192746	0.219068	0.567839	0.602914	0.574167	0.533137	0.676839	0.672798	0.618449	0.580112	0.634238	0.443015	0.517079		140	0.690342	0.687962	0.791145	0.695965	0.961402	1.4774	1.49786	1.43109	1.49729	1.16172	1.11305	0.897514	1.0686	1.19104	1.22263	1.1339	1.26871	1.00095	0.784053	0.607346
141	0.515571	0.462676	0.438306	0.379869	0.458322	0.336548	0.21428	0.161658	0.243796	0.592198	0.551696	0.616071	0.481104	0.63332	0.52761	0.587838	0.589127	0.447638	0.365221	0.288374		141	0.710542	0.683553	0.823082	0.972707	1.10085	1.40149	1.42677	1.21575	1.48317	1.15418	1.11281	0.884957	0.989131	1.35127	1.30885	1.20768	1.06717	0.856648	0.68018	0.778682
142	0.458219	0.511509	0.415263	0.295988	0.548057	0.350835	0.259826	0.216136	0.253159	0.668013	0.630906	0.657426	0.589379	0.596933	0.521939	0.687792	0.558574	0.347574	0.387335	0.327498		142	0.730108	0.754697	0.907242	0.69352	1.15904	1.28201	1.59477	1.17534	1.33971	1.48384	1.30199	0.954438	0.853402	1.29125	1.31923	1.22853	1.34356	0.983812	0.692803	0.669002
143	0.526959	0.379464	0.514856	0.444033	0.432695	0.432903	0.238034	0.187762	0.228778	0.642351	0.677019	0.536742	0.639922	0.629442	0.573874	0.530787	0.520441	0.487118	0.341824	0.222622		143	0.784481	0.802674	0.916564	1.11314	1.22206	1.32615	1.24128	1.07024	1.36363	1.25681	1.21555	0.87473	0.980817	1.29994	1.2283	1.22001	1.24511	0.897035	0.737216	0.805174
144	0.46872	0.431425	0.50032	0.424416	0.4246	0.35348	0.272885	0.212506	0.224145	0.586743	0.691406	0.433041	0.634513	0.607351	0.690193	0.55897	0.508316	0.42351	0.351572	0.219871		144	0.850071	0.819905	0.951349	0.975531	1.41585	1.52924	1.17723	1.11496	1.15277	1.37437	1.05075	0.828771	1.19816	1.21421	1.10832	1.27298	1.28327	0.998719	0.861323	0.890441
145	0.462868	0.440188	0.44315	0.440197	0.423801	0.360385	0.231521	0.286882	0.219358	0.632315	0.591002	0.562839	0.578618	0.621207	0.597928	0.599755	0.445605	0.433073	0.315204	0.435721		145	0.698333	0.866947	0.864701	1.14951	1.20594	1.46059	1.24436	1.0405	1.46277	1.02353	0.801565	0.90646	1.1378	1.15276	1.2413	1.18598	1.23161	1.03056	0.824645	0.808368
146	0.568048	0.557971	0.465154	0.439104	0.552976	0.424032	0.238788	0.225098	0.223201	0.628758	0.657937	0.474354	0.540328	0.553372	0.559108	0.622931	0.464258	0.470587	0.294379	0.447326		146	0.816405	0.843658	0.900281	0.946648	1.07218	1.19157	1.35372	1.14753	1.59756	1.04828	0.789116	0.762589	1.1269	1.28254	1.26356	1.03122	1.14655	1.1277	0.895616	0.863349
147	0.447558	0.429395	0.331452	0.326964	0.442482	0.387199	0.263041	0.235869	0.288038	0.632029	0.629068	0.533868	0.545813	0.558716	0.599946	0.673293	0.492749	0.498399	0.248393	0.398728		147	0.848201	0.807758	0.919686	1.15781	0.890577	1.23995	1.14177	1.25225	1.4248	1.09084	0.860233	0.809259	1.33145	1.293	1.26618	1.1211	1.27075	1.09867	0.877247	0.699319
148	0.513328	0.421976	0.439947	0.397931	0.511999	0.41139	0.269139	0.246482	0.236434	0.59564	0.647182	0.492513	0.544768	0.511411	0.624874	0.5138	0.467066	0.483337	0.310955	0.459275		148	0.90586	0.995115	0.917336	1.09558	1.11943	1.17308	1.16796	1.22934	1.41392	0.970514	0.800184	0.945026	1.22184	1.34842	1.22952	1.162	1.11402	1.31375	0.8727	0.77785
149	0.648953	0.353125	0.44451	0.321386	0.523404	0.417769	0.255667	0.209111	0.360241	0.667398	0.690903	0.423829	0.588482	0.558005	0.626265	0.49491	0.438955	0.461088	0.250908	0.457548		149	0.937668	0.927656	0.83992	1.18653	1.06165	1.09038	1.27452	1.5178	1.59924	1.07392	0.780787	0.773455	1.20254	1.21633	1.29941	1.11631	1.24535	1.27667	0.918152	0.714954
150	0.423241	0.482154	0.406953	0.511531	0.529187	0.422619	0.270236	0.20692	0.270749	0.666986	0.588076	0.49611	0.567701	0.459687	0.664159	0.468495	0.385784	0.422624	0.259646	0.438517		150	0.92603	0.855377	0.900372	0.975775	1.07675	1.0673	1.36413	1.38831	1.46706	0.980612	0.805769	0.862889	1.24389	1.28818	1.29173	1.07853	1.25311	1.47512	1.07272	0.908901
151	0.562314	0.414076	0.414374	0.488195	0.500858	0.427172	0.245775	0.206265	0.245379	0.636517	0.653546	0.42308	0.559371	0.627903	0.52559	0.461919	0.413359	0.446408	0.225588	0.469779		151	0.912482	0.940816	0.902218	0.976033	1.12914	1.15873	1.35493	1.20441	1.34188	1.0439	0.832414	0.860478	1.32006	1.16271	1.13195	0.94663	1.34357	1.44232	1.10683	0.898617
152	0.618664	0.353834	0.356499	0.57403	0.500883	0.400992	0.31107	0.185241	0.250488	0.654155	0.630914	0.541978	0.489338	0.396857	0.544858	0.546942	0.473173	0.425709	0.165555	0.450376		152	1.08083	0.89158	0.879923	1.00494	1.00421	1.0564	1.32313	1.32855	1.45692	1.09812	0.820125	0.868242	1.27056	1.23463	1.14691	1.23902	1.31874	1.29685	1.06901	0.853572
153	0.484474	0.356478	0.401787	0.460607	0.543402	0.436329	0.299095	0.173687	0.298469	0.642869	0.573904	0.525871	0.601746	0.606897	0.419678	0.499188	0.414827	0.562674	0.294643	0.406411		153	0.943159	0.946924	0.901699	0.974882	1.10512	1.12058	1.30252	1.46243	1.44577	1.02997	0.799093	0.901708	1.28873	1.27547	1.2195	1.0057	1.25313	1.34394	1.1725	0.853742
154	0.447634	0.45267	0.360056	0.362339	0.448136	0.460212	0.325441	0.202879	0.295633	0.67589	0.690384	0.467978	0.529206	0.58493	0.555734	0.582519	0.502848	0.529545	0.247425	0.451686		154	0.909727	0.917344	0.910868	0.930728	1.14232	1.24388	1.17577	1.3754	1.556	1.15837	0.836367	0.843042	1.29412	1.20943	1.16827	1.07824	1.25508	1.20576	1.06886	0.829271
155	0.564108	0.414774	0.368187	0.502883	0.626629	0.42482	0.204301	0.197678	0.228202	0.63642	0.599291	0.427039	0.50065	0.604026	0.52294	0.683053	0.567383	0.495937	0.163221	0.448853		155	0.812047	0.86345	0.899217	0.886875	1.16359	1.3349	1.27901	1.32457	1.42442	0.917867	0.790251	0.870235	1.36071	1.23345	1.28545	1.0997	1.12925	1.22024	1.08013	0.764761
156	0.494615	0.385819	0.280868	0.392412	0.418041	0.474311	0.346681	0.231124	0.311501	0.6611	0.43919	0.430602	0.551467	0.504029	0.654318	0.616457	0.452295	0.476192	0.452047	0.252606		156	0.960061	0.805127	0.860878	0.91568	1.18637	1.43065	1.30546	1.26118	1.19655	0.726859	0.836943	0.922979	1.3293	1.40488	1.28318	1.23156	1.10404	1.10255	0.957832	0.666452
157	0.508823	0.376573	0.390898	0.461193	0.525088	0.486681	0.173317	0.241345	0.25454	0.642206	0.52528	0.507157	0.672864	0.62754	0.645185	0.642683	0.601618	0.529383	0.470094	0.287267		157	0.859752	0.932686	0.884802	1.00256	1.42373	1.31605	1.09749	1.32448	1.28092	0.919984	0.819309	0.871733	1.30183	1.44568	1.35731	1.10492	1.0909	1.12826	0.898388	0.676202
158	0.468566	0.416968	0.387848	0.308029	0.576469	0.489567	0.171035	0.254639	0.286206	0.579322	0.54193	0.524299	0.596833	0.630997	0.659603	0.600142	0.511667	0.432036	0.510181	0.277809		158	1.04285	0.930802	0.953705	0.9546	1.31418	1.21879	1.26137	1.63653	1.1182	0.740374	0.859396	0.904606	1.34384	1.35184	1.25084	1.05759	1.17291	1.17242	0.891665	0.739235
159	0.454003	0.331685	0.452569	0.4682	0.479904	0.478232	0.170113	0.256106	0.314815	0.571207	0.456496	0.507163	0.664832	0.644751	0.674497	0.574829	0.502758	0.523508	0.41437	0.298189		159	1.02723	0.912048	0.984885	0.98904	1.2533	1.35708	1.29447	1.41193	1.08112	0.769548	0.790855	0.945245	1.32004	1.3182	1.37157	1.08561	1.23223	1.39041	0.993773	0.709327
160	0.43688	0.276726	0.476594	0.53556	0.675972	0.461151	0.168259	0.222202	0.353886	0.557099	0.523991	0.509294	0.607197	0.610143	0.72168	0.637971	0.426305	0.438424	0.497178	0.202784		160	1.13081	0.921842	1.02302	0.922385	1.33332	1.36075	1.26744	1.48561	0.892942	0.793101	0.895803	0.928685	1.39571	1.44649	1.40696	1.10248	1.21572	1.23903	0.940097	0.675447
161	0.40508	0.316038	0.376211	0.441655	0.395118	0.494664	0.211439	0.247365	0.278991	0.533895	0.556438	0.508246	0.651818	0.683816	0.689473	0.667763	0.51656	0.493241	0.612246	0.424102		161	1.07796	0.926908	1.03006	0.985369	1.4611	1.3846	1.34428	1.2733	0.861901	0.761677	0.84752	0.93673	1.3852	1.30985	1.28789	1.17649	1.10305	0.9376	0.769678	0.751188
162	0.414062	0.305697	0.437018	0.522027	0.593725	0.444287	0.201542	0.238949	0.328215	0.575858	0.453722	0.589428	0.692702	0.661325	0.751473	0.62936	0.439676	0.501309	0.489665	0.155809		162	1.05144	0.918673	1.00833	1.02617	1.39505	1.47404	1.27855	1.34508	0.879216	0.814846	0.831896	0.904227	1.27473	1.30968	1.22947	1.12792	1.04286	1.00066	0.822716	0.741117
163	0.455167	0.278353	0.27393	0.455515	0.580459	0.423827	0.199109	0.266287	0.302927	0.596284	0.42431	0.571246	0.642613	0.683004	0.742509	0.667195	0.470328	0.539452	0.392195	0.395433		163	1.08688	0.892076	1.0145	1.0266	1.30711	1.43244	1.32576	1.45792	0.973598	0.759669	0.920485	0.888053	1.28185	1.25846	1.23083	1.16952	1.05306	1.30668	0.940863	0.813665
164	0.374826	0.269884	0.360666	0.416153	0.618364	0.398163	0.192623	0.239906	0.353531	0.580367	0.397781	0.383502	0.651433	0.878782	0.66138	0.623364	0.497986	0.476166	0.495316	0.273677		164	1.08101	0.904481	0.995896	1.01067	1.36991	1.38308	1.18354	1.46724	0.896731	0.794044	0.874804	0.845958	1.24302	1.46704	1.34455	1.26551	1.12596	1.12397	0.909194	0.878621
165	0.353239	0.355356	0.410875	0.453637	0.684322	0.444544	0.211909	0.240764	0.363605	0.584078	0.40606	0.511841	0.625812	0.807338	0.709101	0.667073	0.491828	0.527632	0.423916	0.129221		165	0.886328	0.850054	0.987501	1.0975	1.28737	1.20158	1.18444	1.16158	0.887114	0.824544	0.861201	0.855341	1.22625	1.37346	1.4324	1.34774	1.15664	1.0061	0.882301	0.943858
166	0.27132	0.31763	0.403186	0.508713	0.354505	0.436369	0.298679	0.229321	0.385568	0.542097	0.483303	0.59352	0.538888	0.712131	0.512079	0.557808	0.495981	0.437211	0.492603	0.167905		166	0.98281	0.909538	0.989779	1.04393	1.21949	1.38182	1.18211	1.27146	0.831997	0.775892	0.801754	0.907009	1.12403	1.39405	1.33846	1.34441	1.03181	1.00202	0.870254	0.835565
167	0.240012	0.680806	0.661088	0.767633	1.01851	0.453895	0.260625	0.25376	0.343597	0.563568	0.535309	0.497731	0.479996	0.527786	0.876443	0.607484	0.513166	0.412158	0.314755	0.20563		167	1.25493	0.947089	1.00882	1.00368	1.18665	1.29057	1.26591	1.52621	1.01069	0.761205	0.815002	0.899001	1.20086	1.43224	1.49775	1.35079	1.10861	1.04813	0.904676	1.06226
168	0.194559	0.258967	0.262721	0.310502	0.351724	0.430848	0.322764	0.206786	0.399418	0.616429	0.668358	0.489251	0.719919	0.791259	0.624444	0.574635	0.440625	0.311994	0.301712	0.114103		168	1.01586	0.899037	0.987075	0.902016	1.12198	1.26327	1.2877	1.24789	1.0209	0.822676	0.799548	0.814009	1.08956	1.31665	1.38353	1.17795	1.20213	0.958116	0.808018	0.992373
169	0.835325	0.686145	0.499092	0.754888	0.789251	0.42875	0.206213	0.272482	0.317574	0.568771	0.59835	0.471568	0.455123	0.667049	0.559892	0.631828	0.569237	0.496345	0.356375	0.373309		169	0.895994	0.945688	0.92975	0.923924	1.03101	1.34792	1.22871	1.39917	1.25349	0.839763	0.926053	0.837923	1.03123	1.25121	1.34493	1.29644	1.09852	0.904616	0.830833	1.16893
170	0.314738	0.343042	0.371992	0.457321	0.826543	0.62366	0.275653	0.221989	0.346202	0.570134	0.462606	0.504713	0.53732	0.628555	0.577225	0.511748	0.713054	0.469158	0.288213	0.37126		170	0.869575	0.950614	0.948863	0.925125	1.0694	1.22315	1.2669	1.33698	1.40389	0.896039	0.860676	0.842242	1.08955	1.33266	1.35388	1.16645	1.15941	0.946377	0.838198	1.01883
171	0.50196	0.478767	0.37743	0.514244	0.548301	0.569671	0.276939	0.294318	0.317952	0.625828	0.627073	0.492328	0.584476	0.572984	0.722455	0.450237	0.482094	0.466907	0.341528	0.361234		171	1.06195	0.921502	1.00265	0.902526	1.03605	1.17389	1.25265	1.29349	1.18199	0.855971	0.862086	0.956607	1.08725	1.20615	1.28177	1.25436	1.17027	0.927121	0.836791	1.08168
172	0.672416	0.867575	0.557014	0.568761	0.480605	0.416128	0.230962	0.275687	0.367331	0.481511	0.569078	0.566348	0.591353	0.58405	0.494282	0.555976	0.552612	0.434881	0.464976	0.627257		172	1.08029	1.02848	1.00695	0.856965	0.992261	1.12494	1.28868	1.18734	1.17779	0.918134	0.910296	0.871346	1.03757	1.23556	1.27765	1.20792	1.18713	0.939233	0.868315	0.982012
173	0.27968	0.27513	0.449633	0.540724	0.511174	0.448947	0.270926	0.275776	0.3417	0.56684	0.527784	0.609899	0.451962	0.610146	0.560199	0.540639	0.611936	0.471503	0.407583	0.278743		173	1.12214	1.03852	1.04956	0.829944	0.876628	1.30271	1.272	1.21147	1.21145	0.918471	0.898277	0.900273	1.08343	1.24314	1.34835	1.31082	1.12717	1.06604	0.863294	0.906025
174	0.356177	0.449145	0.491213	0.525924	0.644163	0.475592	0.249828	0.256099	0.327324	0.536504	0.501269	0.64658	0.417521	0.642654	0.428325	0.674411	0.584159	0.454874	0.522027	0.204975		174	1.05499	0.967009	0.992355	0.859567	0.868998	1.10742	1.14822	1.14517	1.21556	0.854469	0.884254	0.870536	1.02579	1.19868	1.28636	1.27577	1.12511	1.00591	0.850262	0.917044
175	0.30065	0.289994	0.405138	0.561663	0.323832	0.552813	0.279396	0.298107	0.348499	0.551843	0.496731	0.552623	0.559509	0.490381	0.588852	0.606048	0.538464	0.427026	0.272431	0.317739		175	0.941528	1.02094	0.994552	0.890428	0.873281	1.08313	1.40394	1.44918	1.15083	0.860761	0.862179	0.869993	1.08167	1.18828	1.21992	1.35	1.06089	0.997085	0.879718	0.846574
176	0.312154	0.560035	0.588972	0.496681	0.572315	0.467095	0.248565	0.287175	0.353761	0.567693	0.527348	0.477004	0.450064	0.437456	0.472953	0.598275	0.508236	0.488918	0.373987	0.265689		176	0.961279	0.899166	0.963457	0.805792	0.794257	1.0085	1.45702	1.36606	1.18201	0.833308	0.92401	0.905963	1.19676	1.19983	1.21923	1.36479	1.24332	1.01122	0.831323	0.895715
177	0.282445	0.416155	0.431489	0.398596	0.472212	0.518455	0.303432	0.284239	0.364283	0.584579	0.440955	0.504455	0.52207	0.54237	0.58952	0.474735	0.582888	0.567942	0.422478	0.166111		177	1.01998	0.997858	0.939387	0.864339	0.722001	0.902811	1.34159	1.2406	1.17192	0.87335	0.858151	0.848045	1.1781	1.38141	1.28746	1.4126	1.26088	1.00803	0.889048	0.947188
178	0.303681	0.449485	0.514009	0.434091	0.56141	0.455909	0.267515	0.375583	0.337315	0.632827	0.515393	0.584671	0.398922	0.614386	0.707766	0.579244	0.482253	0.366651	0.264544	0.142966		178	1.05704	0.928921	1.00552	0.761761	0.802736	1.08436	1.44169	1.34725	1.03522	0.824157	0.835148	0.931407	1.28839	0.953164	1.16125	1.4071	1.25378	1.26563	0.938596	0.880951
179	0.292211	0.407634	0.535976	0.365521	0.62441	0.485103	0.28825	0.300368	0.332284	0.628566	0.533561	0.676699	0.503871	0.583986	0.601979	0.512903	0.462558	0.431281	0.208325	0.145213		179	1.14088	0.924222	0.986666	0.807961	0.885249	1.08863	1.52739	1.26611	1.02189	0.857592	0.833161	1.01618	1.23204	1.16676	1.21423	1.35996	1.18983	1.06019	0.85455	0.937355
180	0.290723	0.390442	0.429695	0.403981	0.55321	0.565982	0.271541	0.304274	0.310503	0.613228	0.676916	0.586837	0.28668	0.72537	0.545434	0.634691	0.510793	0.398846	0.284071	0.196184		180	1.11469	0.935584	1.00386	0.871209	0.817268	1.05395	1.49584	1.33153	1.00546	0.899356	0.776684	0.93254	1.25923	1.32652	1.16924	1.23393	1.25444	0.907343	0.848361	0.868028
181	0.369548	0.451288	0.594424	0.557466	0.523755	0.508063	0.258097	0.284205	0.231709	0.659937	0.717335	0.881525	0.45423	0.603188	0.741577	0.589533	0.58151	0.479611	0.454351	0.152868		181	1.1588	0.896981	1.00521	0.812004	0.895463	1.24648	1.54473	1.31349	1.01703	0.916767	0.79794	0.91795	1.29211	1.26841	1.13844	1.25244	1.33016	1.10999	0.833283	0.93321
182	0.343526	0.615218	0.650603	0.53422	0.538672	0.551186	0.270409	0.290667	0.164818	0.589427	0.818414	0.759416	0.693383	0.581507	0.659497	0.662767	0.598972	0.583196	0.485372	0.367682		182	1.28543	0.952919	0.977428	0.894295	0.869601	1.10156	1.51654	1.39869	1.08459	0.989844	0.811507	1.00288	1.22988	1.27009	1.05324	1.15835	1.20429	1.01849	0.918021	0.969685
183	0.38442	0.526676	0.501371	0.493497	0.659962	0.661905	0.307184	0.289881	0.231974	0.70158	0.837386	0.713139	0.591078	0.78936	0.533457	0.689388	0.757415	0.618827	0.461304	0.358232		183	1.4242	0.981442	0.975853	0.874367	0.902474	1.19353	1.59282	1.36901	1.10104	0.976019	0.801441	0.941429	1.26777	1.19821	1.19528	1.08159	1.17783	0.949082	0.870967	0.888992
184	0.382006	0.524543	0.547893	0.643778	0.600682	0.616046	0.293232	0.26045	0.170571	0.645302	0.87648	0.803978	0.74087	0.741721	0.659062	0.755418	0.801632	0.670813	0.48232	0.27536		184	1.17507	1.14894	0.982473	0.941558	0.89072	1.18765	1.59426	1.37102	1.03844	0.931821	0.930185	0.93952	1.2907	1.28136	1.34393	1.40532	1.26981	1.0416	0.839305	0.861685
185	0.502648	0.619221	0.695909	0.658232	1.02935	0.683112	0.255272	0.283491	0.213357	0.613284	0.874569	0.652899	0.708552	0.761798	0.710911	0.762693	0.68655	0.702794	0.53104	0.299762		185	1.19977	1.01869	0.971042	0.944029	0.926175	1.27707	1.33345	1.30264	1.09542	0.906202	0.902028	1.00813	1.3181	1.15992	1.36815	1.30014	1.51123	1.08464	0.863686	0.869219
186	0.710462	0.805109	0.839812	0.721048	0.749998	0.723165	0.340604	0.239182	0.221866	0.373906	0.592557	0.798806	0.491661	0.66368	0.546504	0.730478	0.622119	0.593575	0.406524	0.41066		186	1.37546	1.10163	1.0097	0.907608	0.910683	1.06872	1.27168	1.3769	1.14383	0.880527	0.912194	1.03526	1.18588	1.30341	1.26595	1.36327	1.40607	1.16122	0.885289	0.775799
187	0.345435	0.553667	0.840921	0.625753	0.565538	0.597056	0.29487	0.222302	0.203658	0.484041	0.946186	0.778494	0.725115	0.704645	0.660615	0.867767	0.750554	0.813675	0.598631	0.479423		187	0.969011	1.06603	0.966837	0.903409	0.988214	1.10288	1.39394	1.37685	1.27805	0.885129	0.905283	0.951846	1.15216	1.29467	1.23687	1.20358	1.27065	1.08092	0.847641	0.903013
188	0.622065	0.836131	0.626255	0.69709	0.676695	0.608017	0.344486	0.216639	0.219366	0.519628	0.83891	0.792898	0.704667	0.88094	0.684662	0.896092	0.825402	0.698898	0.34575	0.517724		188	1.26509	1.06929	0.978781	0.920625	1.03532	1.14335	1.39156	1.31764	1.13037	0.835937	0.903016	0.923929	1.12335	1.21594	1.21894	1.23313	1.37513	1.19589	0.842029	0.847374
189	0.555363	0.730961	0.697251	0.633867	0.693008	0.591255	0.327542	0.224004	0.216955	0.583	0.769871	0.786224	0.729289	0.838628	0.893881	0.873501	0.81259	0.60703	0.383094	0.494374		189	1.19483	1.03506	0.954412	0.843099	1.02304	1.17411	1.59444	1.25947	1.10558	0.835549	0.916194	0.905046	1.15002	1.25379	1.14422	1.3095	1.27155	0.943217	0.77483	0.91817
190	0.637905	0.6825	0.623023	0.721222	0.578882	0.579063	0.340668	0.195529	0.22208	0.570503	0.75689	0.578696	0.871295	0.81917	0.763379	0.942074	0.607736	0.693693	0.573961	0.330411		190	1.14365	1.04542	0.951988	0.797918	0.954143	1.17484	1.33894	1.30483	1.19232	0.894525	0.887514	0.921885	1.14521	1.27701	1.19068	1.27696	1.39879	0.993487	0.809098	0.928282
191	0.50588	0.76583	0.586774	0.430443	0.555642	0.584843	0.341969	0.180611	0.210671	0.4782	0.724041	0.811376	0.666893	0.835898	0.643018	0.897861	0.789407	0.628934	0.511658	0.620035		191	0.997903	0.949824	0.952715	0.890868	0.995254	1.22119	1.53443	1.20216	1.16662	0.919817	0.904813	0.97729	1.12785	1.38154	1.22837	1.26098	1.2726	0.879375	0.774807	0.908244
192	0.637176	0.695564	0.725944	0.690911	0.523915	0.570366	0.34915	0.200522	0.227346	0.463919	0.731266	0.797813	0.741416	0.857765	0.612185	0.900327	0.783005	0.565901	0.129048	0.483535		192	0.991001	0.915702	0.898407	0.895679	1.08912	1.40291	1.35592	1.25068	1.16236	0.90254	0.930418	0.967282	1.11596	1.45273	1.21105	1.29574	1.26999	0.949635	0.816313	0.912017
193	0.602578	0.838994	0.591441	0.529501	0.476425	0.567596	0.325667	0.186001	0.254773	0.415529	0.651049	0.778813	0.62809	0.819352	0.693924	0.796546	0.743042	0.617588	0.321703	0.592734		193	0.989299	1.01574	0.931154	0.826203	1.0528	1.38675	1.41386	1.38482	1.28596	1.0676	0.925931	0.932392	1.10604	1.39441	1.22611	1.27169	1.26085	0.952015	0.81489	0.867005
194	0.62859	0.45847	0.63816	0.64322	0.572318	0.524392	0.234905	0.24183	0.2153	0.441688	0.637749	0.754519	0.850595	0.82647	0.694889	0.814464	0.776735	0.741474	0.339499	0.63085		194	1.01958	1.06253	0.967213	0.808579	0.951613	1.27709	1.3629	1.4279	1.40522	1.11908	0.860181	0.909609	1.08771	1.22897	1.21031	1.21649	1.04947	0.858428	0.812358	0.925714
195	0.77443	0.806297	0.519847	0.531558	0.66929	0.544718	0.205555	0.174156	0.233379	0.421273	0.591189	0.779116	0.745717	0.799523	0.677194	0.777711	0.76632	0.706264	0.267511	0.616191		195	1.20792	1.03253	1.01324	0.776896	1.00582	1.3246	1.46592	1.42562	1.33867	1.01725	0.858333	0.918347	1.20599	1.41524	1.27579	1.15441	1.1384	0.853679	0.787841	0.940745
196	0.659438	0.658178	0.763119	0.561162	0.624613	0.578978	0.30774	0.193622	0.241821	0.456626	0.703719	0.775112	0.790209	0.80745	0.718411	0.830714	0.788204	0.827421	0.65244	0.543402		196	1.21506	1.01187	0.972627	0.827137	1.09559	1.42677	1.60642	1.31109	1.15924	0.921322	0.841736	0.909263	1.30479	1.42357	1.14846	1.13589	1.15615	0.847482	0.82636	0.835012
197	0.829571	0.608572	0.747496	0.54069	0.699956	0.552051	0.257089	0.203325	0.225491	0.384748	0.683349	0.66369	0.710312	0.804147	0.622816	0.824266	0.889684	0.818578	0.458808	0.621928		197	1.01136	1.0246	1.01975	0.87201	1.0502	1.36976	1.51716	1.19347	1.08279	0.843396	0.933507	0.914818	1.25971	1.40432	1.11575	1.11025	1.10965	0.840706	0.787493	0.904317
198	0.728915	0.649821	0.603879	0.495818	0.562909	0.545012	0.286132	0.198706	0.259823	0.444581	0.606394	0.690318	0.859978	0.693973	0.490566	0.766414	0.74614	0.766477	0.645174	0.513427		198	1.09782	1.04637	0.997168	0.90585	1.07031	1.36081	1.52603	1.28811	1.20966	0.867043	0.897322	0.957673	1.159	1.4915	1.22224	1.15154	0.992286	0.832139	0.7781	0.954351
199	0.782927	0.825202	0.699657	0.554601	0.533276	0.594014	0.283841	0.172397	0.274291	0.43572	0.582247	0.69493	0.824596	0.671233	0.600124	0.707837	0.701306	0.766116	0.435984	0.551687		199	1.02667	0.928494	0.975196	0.859563	0.943025	1.36292	1.48672	1.38202	1.34113	0.945249	0.819918	0.948649	1.18082	1.35583	1.24095	1.31954	1.19265	0.829232	0.801351	0.868949
200	0.633437	0.641943	0.526611	0.604731	0.455958	0.598082	0.320898	0.232792	0.237919	0.384591	0.577245	0.738405	0.708162	0.692804	0.671045	0.75616	0.713407	0.923365	0.528595	0.499032		200	1.10108	0.833527	0.919488	0.870715	0.911165	1.04782	1.36911	1.42668	1.29952	0.996835	0.847932	0.958924	1.14322	1.28909	1.31998	1.2065	1.02764	0.798763	0.775652	0.8826
201	0.853143	0.487598	0.752537	0.55274	0.490907	0.621557	0.288188	0.227691	0.227867	0.341133	0.621405	0.607884	0.68028	0.701726	0.795611	0.67094	0.886763	0.836141	0.50818	0.580416		201	0.976795	0.892993	0.993316	0.872848	0.897023	1.10312	1.3283	1.3831	1.32365	1.04078	0.814204	0.943272	1.13688	1.51661	1.13597	1.17415	1.09599	0.824587	0.76837	0.983182
202	0.668275	0.752347	0.600876	0.472993	0.533374	0.587485	0.329802	0.256087	0.239202	0.337439	0.616378	0.632357	0.644698	0.717167	0.756084	0.739922	0.812063	0.919991	0.498654	0.55275		202	1.02761	0.91442	0.969986	0.847238	0.862182	1.13902	1.36134	1.25073	1.17061	0.97696	0.875629	0.923194	1.12329	1.42839	1.25131	1.13228	1.08749	0.799092	0.831965	0.89778
203	0.594349	0.488467	0.787374	0.531859	0.533461	0.52768	0.273823	0.307692	0.188192	0.345234	0.634298	0.591027	0.616807	0.626471	0.762649	0.745644	0.776642	0.800913	0.414811	0.441693		203	1.06463	0.88128	0.922769	0.843984	0.962814	1.29568	1.28647	1.30862	1.17234	0.945729	0.827755	0.834812	1.06355	1.37825	1.29587	1.16059	1.00166	0.818159	0.891314	1.11817
204	0.673667	0.609729	0.700336	0.520298	0.582538	0.515026	0.30162	0.203106	0.26965	0.383912	0.639382	0.633146	0.660545	0.622825	0.766502	0.839475	0.612448	0.807985	0.399381	0.45613		204	1.00336	0.89838	0.991605	0.84545	0.946082	1.35786	1.22221	1.21774	1.11853	0.948949	0.814221	0.892992	0.954222	1.35421	1.37252	1.3147	0.963412	0.837374	0.772628	1.07648
205	0.717292	0.372463	0.686778	0.5326	0.407793	0.515885	0.302537	0.196187	0.272529	0.365411	0.613205	0.541413	0.506632	0.688529	0.689403	0.668878	0.61937	0.892849	0.233058	0.4892		205	1.04599	0.92863	1.00993	0.828568	0.975727	1.26399	1.24896	1.17407	1.11271	0.890888	0.857418	0.809777	0.960169	1.22888	1.20152	1.33832	0.975038	0.795015	0.832195	0.967246
206	0.682117	0.423716	0.58871	0.490435	0.510141	0.575707	0.290419	0.1304	0.302854	0.390478	0.503735	0.597751	0.611888	0.580166	0.846888	0.592526	0.637824	0.725627	0.506308	0.496799		206	1.09827	0.941501	1.0321	0.812178	0.949338	1.30713	1.15864	1.23913	1.14083	0.914015	0.936904	0.96186	0.90848	1.28422	1.13931	1.193	0.946877	0.795654	0.827976	1.05626
207	0.719893	0.527983	0.624181	0.475769	0.501069	0.545228	0.351658	0.217597	0.295218	0.373803	0.452607	0.622309	0.648574	0.562844	0.788042	0.622205	0.675889	0.711273	0.541452	0.567436		207	0.980689	1.053	0.976085	0.807684	0.988055	1.29398	1.11309	1.33373	1.21214	1.04742	0.873039	0.910968	0.89981	1.37778	1.17821	1.20068	0.944789	0.756905	0.815823	0.972333
208	0.61224	0.685231	0.369563	0.623328	0.441384	0.557969	0.37023	0.227798	0.301824	0.419196	0.587689	0.602167	0.694364	0.629072	0.661941	0.659729	0.643194	0.731269	0.562436	0.475132		208	1.24936	1.01602	0.959931	0.859591	0.90093	1.25323	1.18173	1.30991	1.12049	0.931242	0.922208	0.940562	0.910494	1.26283	1.05921	1.12602	0.932761	0.763187	0.829981	1.03203
209	0.556526	0.620598	0.539688	0.598943	0.470412	0.445133	0.296606	0.203655	0.321793	0.391197	0.54134	0.617136	0.753479	0.683224	0.721265	0.705479	0.712413	0.696956	0.63994	0.551733		209	1.21047	1.02142	0.998583	0.859931	0.94607	1.23023	1.12224	1.17807	1.24637	0.944413	0.919285	0.960352	0.947092	1.38111	1.20953	1.27259	0.996187	0.834648	0.850154	0.931314
210	0.954508	0.505656	0.595521	0.510262	0.396935	0.516953	0.364	0.222074	0.280107	0.424833	0.506717	0.511763	0.725082	0.624454	0.591667	0.614097	0.632235	0.64367	0.718933	0.826171		210	1.33061	1.01704	1.00207	0.9187	0.956576	1.4439	1.01576	1.04431	1.05966	0.871148	0.87573	0.901815	1.07414	1.12336	1.31941	1.40321	1.03562	0.752514	0.818679	1.09253
211	0.687928	0.741791	0.461657	0.62198	0.464214	0.470725	0.296311	0.179774	0.27489	0.428097	0.51732	0.659851	0.765415	0.749552	0.641343	0.662275	0.624945	0.775977	0.431819	0.614119		211	1.37132	1.09725	1.02194	0.884477	1.05896	1.35526	1.0688	1.24727	1.06951	0.836674	0.874963	0.896629	1.11684	1.26542	1.32107	1.4845	1.1459	0.759126	0.856549	0.932119
212	0.571759	0.67569	0.49709	0.50523	0.547332	0.426894	0.323348	0.347772	0.313139	0.425224	0.527611	0.442827	0.673444	0.627443	0.584735	0.692489	0.662498	0.629729	0.539993	0.574456		212	1.43917	1.09926	0.997404	0.943372	1.08975	1.26107	1.09075	1.19673	0.919613	0.769448	0.882531	0.897104	1.17246	1.39049	1.15041	1.243	1.00174	0.833712	0.879269	0.987154
213	0.595401	0.600314	0.523186	0.480288	0.491142	0.473964	0.273379	0.213032	0.285298	0.40405	0.559741	0.517453	0.699686	0.67055	0.710376	0.569324	0.749087	0.586194	0.386826	0.668187		213	1.36342	1.10365	1.00684	0.955567	1.14223	1.26572	1.07053	1.18523	0.897537	0.785961	0.867244	0.894378	1.28001	1.34558	1.21396	1.37917	1.10079	0.835858	0.914769	0.91346
214	0.613663	0.662933	0.543443	0.456076	0.515967	0.478295	0.314796	0.215947	0.313556	0.418148	0.545874	0.545064	0.680534	0.663437	0.491636	0.650355	0.528891	0.566047	0.565433	0.491983		214	1.28244	1.08205	1.03393	0.95381	0.96422	1.19545	1.11234	1.14745	0.855236	0.89771	0.889044	0.866069	1.18106	1.21547	1.31486	1.27577	0.95966	0.820436	0.895644	0.904094
215	0.520092	0.657573	0.431132	0.514584	0.44523	0.500684	0.381138	0.375968	0.309421	0.443726	0.551336	0.6281	0.689274	0.431586	0.54781	0.501123	0.492305	0.625508	0.586224	0.431744		215	1.2714	1.02263	0.9847	0.910275	1.16173	1.25451	1.12517	1.16878	0.95891	0.927647	0.910004	0.930753	1.11344	1.20751	1.27403	1.34577	0.976723	0.819101	0.881414	0.907749
216	0.715509	0.678267	0.4114	0.557415	0.443061	0.467157	0.400615	0.362156	0.359395	0.4365	0.581823	0.548014	0.647617	0.572563	0.52733	0.474812	0.62466	0.398878	0.654984	0.467581		216	1.06039	1.0356	1.03325	0.932819	1.17053	1.27699	1.16608	1.11743	0.912338	0.891244	0.882616	0.866092	1.35957	1.34901	1.20662	1.29177	1.12834	0.839349	0.93281	0.874147
217	0.443594	0.652297	0.61603	0.469902	0.480854	0.507446	0.42063	0.425977	0.401394	0.394333	0.52268	0.537985	0.678879	0.405384	0.472526	0.608051	0.562852	0.38949	0.481459	0.470408		217	1.04902	1.033	0.98957	0.943237	1.36095	1.24404	1.20804	1.03343	0.913368	0.919527	0.834754	0.879751	1.32112	1.23945	1.17592	1.14718	0.957956	0.95977	0.871096	0.90908
218	0.585128	0.699108	0.433774	0.44111	0.390896	0.485493	0.498565	0.324783	0.438285	0.405368	0.556474	0.565029	0.548353	0.498386	0.67249	0.492986	0.401823	0.671277	0.543199	0.577432		218	1.24296	1.05637	0.963208	1.01308	1.25932	1.10105	1.13907	0.965149	0.921679	0.882054	0.881155	0.908905	1.39896	1.32893	1.14033	1.30692	1.13599	0.837243	0.884575	0.862958
219	0.452381	0.584103	0.473368	0.287648	0.440171	0.539025	0.429026	0.445978	0.344982	0.44671	0.576181	0.613065	0.510676	0.613607	0.607371	0.539344	0.371025	0.503749	0.532775	0.420329		219	1.13369	1.02556	0.923366	0.943461	1.29006	1.09409	1.13191	0.962119	0.823225	0.820235	0.875687	0.983427	1.12294	1.36354	1.40137	1.31356	1.11924	0.822558	0.82327	0.89491
220	0.501384	0.596188	0.475875	0.326131	0.499777	0.498164	0.420599	0.447463	0.328047	0.393633	0.541168	0.584078	0.51117	0.694737	0.488963	0.550523	0.576362	0.443169	0.538542	0.540712		220	1.09146	1.00579	0.899536	0.997249	1.16979	1.1293	1.06257	1.29257	0.900282	0.845111	0.8379	0.817026	1.18526	1.42719	1.26404	1.29062	1.19605	0.888281	0.817557	0.881517
221	0.654664	0.542766	0.473373	0.282233	0.540671	0.495464	0.394733	0.514351	0.276437	0.386814	0.337389	0.455987	0.5719	0.630839	0.70107	0.445455	0.826148	0.444749	0.613163	0.461451		221	0.946732	1.02396	0.876806	1.04929	1.06858	0.952475	1.09027	1.33931	0.980429	0.813171	0.83087	0.833622	1.15923	1.42901	1.22765	1.32078	1.10017	0.891236	0.807256	0.875761
222	0.499042	0.558181	0.467537	0.42023	0.550775	0.467412	0.324114	0.4457	0.411552	0.455004	0.517641	0.39079	0.474511	0.496736	0.477317	0.628742	0.355522	0.390846	0.419186	0.599233		222	1.0534	1.00199	0.859746	0.997876	0.993562	1.20356	1.15172	1.22252	1.06542	0.791523	0.860271	0.770733	1.03496	1.44024	1.22411	1.33137	1.01434	0.829604	0.835802	0.832176
223	0.365165	0.600978	0.513793	0.440551	0.483243	0.430473	0.359253	0.319649	0.374672	0.477777	0.494961	0.495368	0.627669	0.68333	0.526397	0.498993	0.68201	0.521158	0.404642	0.522457		223	1.03072	1.05161	0.911468	1.03589	0.934059	1.00341	1.14686	1.0569	1.06932	0.865355	0.908935	0.807772	1.09601	1.35388	1.18174	1.27475	1.23028	0.842432	0.823058	0.856028
224	0.538439	0.541152	0.426445	0.461799	0.502645	0.484694	0.314501	0.294528	0.388403	0.482809	0.565829	0.511388	0.696742	0.680499	0.625314	0.547274	0.546729	0.417757	0.502085	0.863601		224	0.953625	1.02771	0.977813	1.00515	0.980214	0.982204	1.16154	1.04072	1.03324	0.866122	0.823948	0.846141	1.09239	1.39808	1.20047	1.28981	1.09035	0.882287	0.851279	0.80489
225	0.459616	0.670917	0.484514	0.375322	0.424555	0.487456	0.345146	0.249597	0.440206	0.479737	0.465532	0.592941	0.526675	0.655225	0.541679	0.482558	0.556794	0.352889	0.467274	0.665928		225	1.04993	0.915128	1.00998	1.00299	0.866784	0.928943	1.02331	1.07313	1.22289	0.980338	0.812572	0.871235	1.02203	1.43495	1.15332	1.19451	1.13077	0.915497	0.868066	0.877347
226	0.577716	0.606047	0.47062	0.542057	0.389115	0.506002	0.368091	0.329413	0.411258	0.456815	0.43394	0.655974	0.608681	0.672157	0.528143	0.449665	0.643547	0.501081	0.419801	0.788792		226	0.967397	0.870213	0.896131	0.947491	0.953745	0.846965	1.16083	0.97298	1.24337	1.1125	0.873328	0.813234	1.04537	1.42454	1.17666	1.09775	1.23188	0.879236	0.856419	0.839688
227	0.410118	0.626309	0.558551	0.484703	0.513255	0.471672	0.403392	0.259703	0.45066	0.502065	0.479678	0.514678	0.609023	0.626167	0.708917	0.58842	0.475456	0.435346	0.464128	0.464936		227	1.08763	0.932923	0.963595	1.00953	1.0177	0.819099	1.18823	1.10384	1.08517	1.18339	0.876854	0.805002	1.05564	1.42482	1.24027	1.01508	1.17778	0.959863	0.835063	0.839418
228	0.532545	0.678045	0.484269	0.394765	0.530726	0.516652	0.354281	0.244369	0.523725	0.441324	0.464612	0.507107	0.565989	0.662823	0.471503	0.51509	0.369823	0.59111	0.669219	0.697356		228	1.1075	1.12695	0.962953	1.03279	1.02998	0.944118	1.10775	1.11371	1.09199	1.18361	0.951942	0.860131	1.09379	1.49602	1.38645	1.00735	1.10762	1.00375	0.910678	0.903214
229	0.491414	0.680634	0.51157	0.453204	0.556126	0.564933	0.424917	0.347117	0.409047	0.4752	0.462848	0.534735	0.508324	0.620397	0.526214	0.442883	0.454692	0.601343	0.490568	0.499052		229	1.18929	1.09541	0.946214	1.00599	1.08598	0.998508	0.937966	1.3444	1.05274	1.28324	0.975377	0.881861	1.11001	1.51503	1.53985	1.0712	1.10524	1.03996	0.936657	0.897882
230	0.710112	0.566349	0.50658	0.381317	0.472782	0.53084	0.369823	0.28154	0.444875	0.462236	0.520581	0.551018	0.514854	0.540852	0.443186	0.555121	0.480867	0.497632	0.633466	0.697411		230	1.08519	1.10256	0.990709	0.985827	1.07867	1.16896	0.847231	1.13342	1.02557	1.25363	1.08185	0.905415	1.08215	1.45454	1.40945	1.04227	0.996949	1.02226	0.945092	0.904913
231	0.416125	0.613051	0.476776	0.475008	0.472295	0.521465	0.450997	0.342862	0.349116	0.455631	0.506502	0.537856	0.564449	0.620137	0.857899	0.448067	0.48546	0.445317	0.442443	0.421779		231	1.15542	1.09485	1.01137	1.02926	1.02751	1.30915	0.880589	1.12447	1.05764	1.26366	1.13302	0.949409	1.13998	1.48063	1.37592	1.01058	0.975427	1.05375	0.874077	0.912829
232	0.473452	0.635006	0.447671	0.421692	0.427064	0.555023	0.46221	0.461838	0.32411	0.476911	0.41863	0.574338	0.605275	0.579489	0.750665	0.471824	0.495817	0.468444	0.517624	0.504633		232	0.957485	1.24692	1.02969	1.02081	0.937203	1.16629	1.06895	1.16426	1.1787	1.1642	1.15922	0.925164	1.18228	1.49048	1.37506	1.02362	0.927307	1.04453	0.895169	0.874468
233	0.502872	0.986904	0.774074	0.559636	0.352194	0.483467	0.387674	0.419024	0.391011	0.462715	0.50063	0.502127	0.456463	0.487166	0.407389	0.437635	0.495022	0.423999	0.444686	0.819703		233	1.011	1.20355	1.04403	0.980181	0.927093	1.14865	0.972941	1.10598	1.09813	1.26169	0.986856	0.847656	1.07668	1.4798	1.3723	1.11294	0.987941	0.989305	0.823148	0.892904
234	0.520883	0.543392	0.536551	0.500535	0.386777	0.527628	0.450052	0.302083	0.339946	0.509488	0.44649	0.688499	0.611857	0.540003	0.427283	0.542512	0.549144	0.303488	0.483072	0.374852		234	1.00476	1.24146	1.02516	0.991591	0.928774	1.2527	1.07335	1.01402	1.25207	1.14106	1.06883	0.862288	1.14448	1.43035	1.40852	1.20421	0.955078	0.901892	0.823737	0.901292
235	0.555882	0.463263	0.59001	0.475624	0.29715	0.510475	0.58354	0.354648	0.334817	0.482094	0.515858	0.47436	0.556953	0.594829	0.585307	0.516516	0.368876	0.565798	0.428999	0.587551		235	0.987724	1.14941	1.00804	0.97045	0.94334	1.32946	1.0557	1.19876	1.22629	1.23324	0.940544	0.863831	1.07846	1.47606	1.38063	1.15113	0.982396	0.923732	0.849769	0.91458
236	0.595334	0.52161	0.560173	0.486523	0.439908	0.47781	0.500986	0.365932	0.343517	0.520406	0.385102	0.596614	0.518405	0.603991	0.621688	0.458611	0.445582	0.416466	0.42822	0.716089		236	1.04533	1.26261	0.996232	1.00259	1.08697	1.37488	1.10891	1.22333	1.23586	1.24315	0.962727	0.879312	0.966981	1.34712	1.32322	1.15819	1.08616	0.883929	0.851445	0.944978
237	0.411751	0.535958	0.560177	0.459815	0.414105	0.502357	0.440728	0.27446	0.422689	0.482027	0.386201	0.521893	0.629171	0.557615	0.573659	0.425619	0.456742	0.471785	0.393926	0.660344		237	1.07041	1.25694	1.01696	1.03572	1.04673	1.21841	1.024	1.21219	1.21852	1.15541	0.92441	0.927368	1.14927	1.38425	1.33478	1.10388	1.02827	0.976511	0.86597	0.978045
238	0.661133	0.540568	0.552778	0.47536	0.375334	0.5071	0.432618	0.251577	0.403276	0.459862	0.478476	0.577473	0.555235	0.553498	0.493314	0.397383	0.443989	0.476428	0.508421	0.631989		238	1.14382	1.2278	0.983282	1.08079	1.13416	1.15059	1.03099	1.22416	1.1407	1.04564	0.87042	0.900974	1.06771	1.44113	1.24751	1.06953	0.963207	0.895215	0.905709	1.01077
239	0.538223	0.56664	0.518868	0.463487	0.375487	0.517694	0.428339	0.277271	0.385028	0.504822	0.541221	0.526503	0.620164	0.577796	0.482489	0.433181	0.384512	0.408845	0.433147	0.589344		239	1.07677	1.25259	1.0368	1.07358	1.1038	1.12686	0.986875	1.19313	1.43551	1.146	0.868683	0.893629	0.901561	0.901095	0.946275	0.95498	0.892054	0.882968	0.932344	1.17075

## Sheet: Supplement 1F(top)
	Bin 0	Bin 1	Bin 2	Bin 3	Bin 4	Bin 5	Bin 6	Bin 7	Bin 8	Bin 9	Bin 10	Bin 11	Bin 12	Bin 13	Bin 14	Bin 15	Bin 16	Bin 17	Bin 18	Bin 19			Bin 0	Bin 1	Bin 2	Bin 3	Bin 4	Bin 5	Bin 6	Bin 7	Bin 8	Bin 9	Bin 10	Bin 11	Bin 12	Bin 13	Bin 14	Bin 15	Bin 16	Bin 17	Bin 18	Bin 19
5	-0.00243643	-0.201817	-0.127466	-0.00225242	-0.196888	-0.124841	0.0993795	0.378568	-0.102066	-0.0769472	0.150462	0.107479	0.428108	0.298909	0.160752	-0.0255016	0.086975	0.148834	-0.0302784	0.363914		5	0	0.0363364	0.104263	0	0	0.0859676	0	0.176908	0.0844618	0	0	0.491811	0	0	0.0658601	0.0134603	0.131763	0.12064	0.0982156	0.207921
6	-0.0715663	-0.196649	-0.0405278	0.196402	-0.090173	-0.0841401	0.0662103	0.408844	-0.0160637	-0.0650426	-0.0496577	0.167473	0.42986	0.340653	0.20289	-0.219777	0.146431	0.200158	-0.127336	0.260507		6	0	0	0.177156	0.0628254	0.110136	0.0859676	0.0175181	0.395338	0	0	0	0	0.573862	0	0.10571	0	0	0.106799	0	0.12281
7	-0.060103	-0.134926	-0.0113875	0.350982	0.0193228	-0.171658	0.13882	0.46845	0.116078	-0.0540841	-0.0302717	0.174407	0.362866	0.642139	0.132036	-0.0641327	-0.0197482	0.193748	0.00648204	0.14735		7	0.0900912	0.217143	0.236208	0.153332	0	0.135872	0.29888	0.709142	0.385582	0	0	0	1.17541	0	0.0918697	0.0957443	0.104081	0	0.00066484	0.0733348
8	-0.0142838	-0.192171	-0.0273798	0.319596	-0.0580506	0.0231927	0.358569	0.408634	0.21873	-0.0894659	-0.0307384	0.219496	0.444866	0.572533	0.354956	0.104676	0.175192	0.168836	-0.0216828	0.11179		8	0.00352311	0.125443	0.0401352	0.104709	0.0824546	0.0582859	0	0.367656	0.0567801	0.415644	0.184764	0.286351	0	0	0.159402	0.219551	0.00239841	0	0.0145057	0.0871756
9	0.033737	-0.218799	-0.251824	0.113861	-0.0162973	0.108716	0.395171	0.506627	0.241749	-0.00426026	-0.102537	0.170148	0.423129	0.690546	0.250345	-0.196403	0.0911416	0.257558	0.0416322	0.17714		9	0.0537276	0.100354	0.126869	0.11855	0.020466	0	0.121758	0.709142	0.00762879	1.64161	0	0.122414	0	0	0.0520192	0.0546023	0.0601601	0.106799	0.0145057	0.407888
10	-0.0402963	-0.215486	-0.220162	0.235483	0.0678879	0.115525	0.4232	0.473195	0.269489	0.112729	-0.0599813	0.0317016	0.279752	0.645937	0.293825	-0.234429	0.0101734	0.273158	0.104678	0.251141		10	0.0900912	0.061425	0.309101	0.222898	0.0962955	0.263362	0.29888	0.545319	0	0	0.198605	0.655748	0	0.11668	0	0	0.00239841	0.160853	0.0843746	0.19408
11	-0.146885	-0.187226	-0.200276	0.219394	0.0999853	0.375179	0.412959	0.244454	0.22739	0.0907922	-0.0912001	0.109013	0.365651	0.557448	0.274178	-0.143085	-0.117412	0.208749	0.149169	0.327505		11	0	0.0224956	0.0904225	0.222897	0.0204661	0.135872	0.23984	0	0.133613	0	0	0.122414	0	0	0.133392	0	0.318889	0.0804265	0.112056	0.150492
12	-0.167302	-0.225225	-0.217527	0.303344	-0.0134532	0.447971	0.43345	0.495924	0.204599	0.169011	-0.0733801	0.121594	0.352142	0.565326	0.181683	-0.160947	-0.164716	0.194825	0.0921001	0.284607		12	0.154137	0.283754	0.0452113	0.0766662	0	0.227298	0.0903996	0.573001	0	0.214743	0.988191	0	0	0	0.226934	0.288374	0.189524	0.0125316	0.0283465	0.27919
13	-0.201903	-0.234822	-0.187393	0.286338	0.188041	0.473396	0.589616	0.329155	0.295398	0.227173	-0.116197	0.166258	0.406362	0.591063	0.257545	-0.0741075	-0.0450405	0.241484	0.0623179	0.290395		13	0.0675684	0.153125	0.0678169	0.097608	0.261795	0	0.135599	0.286123	0.0214697	0	0.466414	0.314033	0	0	0.280625	0.123426	0.0162392	0	0.447561	0.207921
14	-0.0905893	-0.206602	-0.132578	0.371438	0.17655	0.62053	0.466479	0.362093	0.33571	0.393649	-0.0451253	0.233901	0.332648	0.517383	0.266466	-0.129098	0.0424565	0.222096	0.162462	0.314451		14	0.0312048	0.153125	0.0678169	0.0976079	0.110136	0.277203	0.25368	0.613768	0	0.200902	0	0.314033	0	0	0.0520192	0	0.117922	0	0.293982	0.19408
15	-0.204184	-0.157045	-0.196317	0.244426	0.282372	0.564648	0.475427	0.267847	0.243337	0.228059	-0.133389	0.211411	0.498139	0.482278	0.335078	-0.0964642	-0.0399	0.285061	0.141975	0.262805		15	0	0.0224955	0.0904225	0.11855	0	0	0	0.272282	0.448574	0.429485	0.198605	0	0	0	0.266784	0	0.00239841	0.106799	0.154244	0.0515409
16	-0.203444	-0.155454	-0.209385	0.277846	0.117105	0.457131	0.607317	0.464598	0.289017	0.233211	-0.188906	0.178244	0.521612	0.438497	0.291418	-0.0924326	0.148529	0.292284	0.157296	0.327917		16	0.0537275	0.217143	0.199762	0.0489845	0.172125	0	0.0627178	0.272282	0.0706208	0.187061	0.198605	0.833526	0	0.11668	0.187083	0.302215	0.0300801	0.0263724	0.321663	0.114857
17	-0.195948	-0.203897	-0.222809	0.23112	0.369518	0.477168	0.676337	0.334377	0.251721	0.36811	0.0756351	0.26555	0.522446	0.543551	0.310551	0.0168487	0.263788	0.182569	0.226354	0.326811		17	0.263227	0.400542	0.118104	0.146231	0.123977	0.0360634	0.208481	1.39211	0	0	0.988191	0.150096	0	0	0.0918697	0	0.219605	0.092958	0	0.180239
18	-0.14832	-0.236732	-0.175979	0.261308	0.218298	0.568029	0.519547	0.45702	0.257038	0.317353	0.201885	0.195469	0.49339	0.494013	0.250089	-0.0345126	0.0759182	0.305974	0.247248	0.34056		18	0	0.125443	0.0401353	0.174274	0.234113	0	0.0488771	1.02295	0	0	0.438732	0.819685	0	0.446925	0.0918697	0	0.277366	0	0.210272	0.10897
19	-0.173375	-0.192361	-0.15062	0.222657	0.353239	0.501624	0.529616	0.306611	0.208207	0.387965	0.140935	0.267327	0.497357	0.504974	0.262547	-0.0426749	0.0576838	0.334803	0.240861	0.246545		19	0	0.203302	0.185921	0.104709	0.0824546	0	0.166958	0.258441	0	0	0.184764	0.108574	0.54618	0	0.266784	0.0546023	0.117922	0.160853	0.224113	0.0515409
20	-0.2243	-0.19137	-0.0907593	0.247888	0.131254	0.555491	0.56483	0.501427	0.150367	0.262496	0.413729	0.342891	0.487143	0.412691	0.241642	-0.0906946	0.174638	0.263288	0.266927	0.295391		20	0.126455	0	0.0175296	0.188115	0.0962954	0.0721267	0.121758	0.326889	0.511566	0.187061	0.452573	0.47797	0	0	0.0121688	0.178409	0.074001	0.12064	0.307823	0.136651
21	-0.186368	-0.223987	-0.126475	0.266434	0.256013	0.576204	0.465785	0.394183	0.268099	0.388755	0.331479	0.388029	0.452348	0.421624	0.191828	-0.174532	0.211483	0.16767	0.229767	0.0797472		21	0.103932	0.192054	0.0313705	0.271521	0.0343069	0.213458	0.312721	0.77759	0	0	0.466414	0.314033	1.18925	0.302563	0.213093	0.0546023	0.00239841	0.106799	0.154244	0.0515409
22	-0.229668	-0.240251	-0.0894101	0.200494	0.36133	0.554539	0.402501	0.45534	0.239143	0.365747	-0.179346	0.42938	0.290933	0.517658	0.343562	-0.0862116	-0.106923	0.307618	0.126025	0.145241		22	0.0173639	0.061425	0.163315	0.0837671	0.172125	0	0.594083	0.545319	0	0.187061	0.198605	0.300192	1.17541	0	0.374167	0.109585	0.0023984	0.106799	0.43372	0.158445
23	-0.247278	-0.215983	-0.101224	0.230287	0.435036	0.525542	0.453747	0.284919	0.300464	0.326105	0.436676	0.245648	0.398176	0.375341	0.250015	-0.118412	0.0101656	0.253436	0.216783	0.121723		23	0.0537276	0.061425	0.0904225	0.0142019	0	0.00838163	0.180799	0.545319	0	0	1.21448	0	0.560021	0.11668	0.213093	0.164568	0.0601601	0.485177	0	0.336619
24	-0.247262	-0.235008	-0.0970468	0.250897	0.437856	0.42426	0.47599	0.361038	0.305634	0.40653	0.325242	0.238878	0.481844	0.567341	0.242747	-0.116112	0.0832222	0.102518	0.196571	0.183618		24	0.126455	0.178213	0.0539761	0.188115	0	0	0.29888	0.163067	0.00762879	0.187061	0.198605	0.122414	0	0.976894	0.334317	0	0.131763	0.174694	0.168085	0.564268
25	-0.172541	-0.204344	-0.126637	0.214732	0.408844	0.60673	0.57728	0.440309	0.265294	0.366409	0.141921	0.209026	0.415112	0.547556	0.322421	-0.107261	0.0625601	0.275004	0.151832	0.120175		25	0	0.114195	0.322942	0.271521	0.110136	0	0	0.832198	0.0844618	0	0.974351	0.669589	0	0	0.280625	0.0134603	0.131763	0.174694	0.0283465	0.243556
26	-0.173524	-0.190472	-0.156844	0.236726	0.416521	0.635044	0.324176	0.501776	0.233189	0.363076	0.314112	0.176279	0.354815	0.521654	0.224086	-0.05724	0.0799113	0.339607	0.173613	0.150398		26	0.176659	0.0752658	0.213603	0.167173	0.0343069	0	0.0175181	0.832197	0	0	0.720382	0.491811	0	0	0.145561	0.0407615	0.161843	0.092958	0.000664832	0.144604
27	-0.179505	-0.244331	-0.105212	0.284778	0.531072	0.461896	0.405427	0.30822	0.254771	0.324476	0.414988	0.218593	0.445422	0.708688	0.231659	-0.0817113	0.0403873	0.27634	0.193332	0.119303		27	0.0035231	0.164372	0.222368	0.278622	0.0824546	0	0.166958	0.804516	0	0	0.438732	0	0.54618	0	0.159402	0	0	0.160853	0	0.19408
28	-0.196948	-0.203467	-0.166308	0.221791	0.462448	0.478545	0.510119	0.237559	0.316791	0.502475	0.33371	0.358192	0.481304	0.633855	0.230743	-0.18508	0.108377	0.289989	0.178489	0.16027		28	0.0537276	0.100354	0.126869	0.153332	0.0962954	0	0.357921	0.982179	0	0	0.706541	0	0	0.11668	0.0520192	0	0.117922	0.106799	0.363851	0.336619
29	-0.19014	-0.237467	-0.148134	0.234409	0.347067	0.512588	0.539125	0.370429	0.345265	0.593313	0.268045	0.444139	0.422655	0.411401	0.187026	-0.0888637	0.32389	0.228506	0.21862	0.163713		29	0.126455	0.100354	0.0175296	0.0837671	0	0	0.535043	0.381497	0	0.429485	0.198605	0.47797	0	0.11668	0.173243	0	0.074001	0.0665856	0	0.386095
30	-0.184125	-0.23414	-0.134442	0.180012	0.348694	0.345266	0.470202	0.307919	0.418409	0.471431	0.125516	0.280951	0.543366	0.58482	0.229474	-0.0855244	0.231083	0.330219	0.276327	0.0878311		30	0.322114	0.114195	0.0678169	0.0628254	0.185966	0	0.312721	0.832198	0	0	0.212446	0.491811	1.18925	0	0.159402	0.109585	0	0.268961	0	0.0515409
31	-0.234451	-0.190261	-0.093159	0.270492	0.426315	0.495158	0.417546	0.333411	0.29828	0.485986	0.224321	0.372852	0.505847	0.458167	0.212198	-0.048659	0.123725	0.336306	0.150757	0.178503		31	0.0900912	0.0224956	0.272655	0.11855	0.0962954	0.327107	0.121758	0.763749	0	0.914333	0	0.47797	0	0	0.0918697	0	0.161843	0	0.280141	0.322778
32	-0.22342	-0.201904	-0.129348	0.282705	0.220903	0.423243	0.385284	0.324169	0.424541	0.400999	0.289601	0.265163	0.559755	0.521139	0.264114	-0.133312	0.23919	0.339091	0.189777	0.20278		32	0	0.164372	0.185921	0.104709	0.00662523	0	0.048877	1.18677	0.119772	0.17322	0.184764	0	0.54618	0.102839	0.254616	0.0961248	0.159444	0.256429	0.195766	0.128698
33	-0.195271	-0.212518	-0.0727012	0.232361	0.394287	0.488765	0.321483	0.302789	0.417516	0.432911	0.225137	0.413759	0.620957	0.4754	0.0131322	-0.0758114	0.312581	0.320652	0.205485	0.128107		33	0	0.0640181	0.131945	0.0557244	0.289477	0.0499042	0.281362	0.477627	0	0.228583	0.748064	0.341715	0	0.330245	0.5214	0	0.161843	0.147012	0.0705339	0.180239
34	-0.197738	-0.240942	-0.107229	0.212082	0.530297	0.484073	0.46415	0.220744	0.437474	0.449454	0.0167707	0.327362	0.573318	0.293373	0.0932993	-0.0823994	0.188912	0.319101	0.153904	0.165757		34	0.185341	0.00865471	0.0401352	0.209057	0.00662523	0.185776	0.285039	0.258441	0	0.17322	0	0.286351	0	0	0.10571	0.109585	0.175684	0	0.433719	0.19408
35	-0.19212	-0.208044	-0.10689	0.326818	0.400166	0.414476	0.41629	0.149096	0.546776	0.42939	-0.116614	0.363736	0.52116	0.317912	-0.0142857	-0.163126	0.130844	0.369762	0.213548	0.122743		35	0.0173639	0	0.126869	0.0837671	0.0962954	0	0.29888	0.599927	0	0.187061	0.706541	0.300192	0.560021	0.11668	0.145561	0.0407615	0.104081	0.038904	0.419879	0.180239
36	-0.203887	-0.159306	-0.0795767	0.245941	0.414679	0.459516	0.509693	0.359141	0.500437	0.402896	-0.195815	0.421404	0.539017	0.325794	0.044776	-0.0137875	0.244424	0.374178	0.0843916	0.114466		36	0	0.00865472	0.0401352	0.139491	0.0824546	0.122031	0.403121	0.203833	0.0567801	0.17322	0.692701	0.108574	0	0.102839	0.252943	0	0	0.147012	0.0705338	0.144604
37	-0.17579	-0.150757	-0.103453	0.282905	0.383061	0.473911	0.463172	0.340781	0.412559	0.354395	0.0931243	0.490787	0.464644	0.329544	0.0263615	-0.230974	0.024567	0.320492	0.245734	0.153014		37	0.00352312	0.0475842	0.113028	0.139491	0.461602	0	0.462161	0.313048	0	0.658069	0.438732	0.108574	0	0.618968	0.266784	0.0546023	0.00239841	0	0	0.407888
38	-0.142071	-0.222128	-0.109939	0.255506	0.458613	0.478797	0.468795	0.294096	0.421773	0.396059	0.104705	0.476985	0.500936	0.351111	0.0172244	-0.157914	0.138464	0.262472	0.0816197	0.118447		38	0	0.0224956	0.0904225	0.188115	0.0962954	0.0721267	0.535043	0	0	0.914334	1.21448	0.300192	0	0	0.427858	0	0.117922	0.0527448	0.224113	0.265349
39	-0.139034	-0.196561	-0.101998	0.241643	0.436267	0.492895	0.511101	0.332909	0.381959	0.376933	0.10167	0.447936	0.396523	0.290858	0.0391989	-0.155727	0.113756	0.256448	0.16408	0.0544686		39	0	0	0.0539761	0.0837671	0.020466	0.0721267	0.535043	0.108459	0	0.914333	0	0	0	0.632808	0.119551	0	0.074001	0	0.168085	0.457364
40	-0.158691	-0.182025	-0.156093	0.256759	0.431072	0.604132	0.419615	0.327892	0.432217	0.420109	-0.0740691	0.501466	0.445178	0.316057	0.0742776	0.0369204	0.274567	0.131549	0.15158	0.119144		40	0.140296	0	0.213603	0.097608	0	0	0.371762	0	0.0844618	0.443326	0.466414	0.491811	0.573862	0.302564	0.226934	0.178409	0	0.336856	0.237954	0.314825
41	-0.143726	-0.247101	-0.147508	0.221329	0.444602	0.5933	0.369135	0.26004	0.486305	0.388935	-0.157277	0.552023	0.452039	0.437092	0.0148419	-0.171831	0.155703	0.202284	0.135706	0.0715851		41	0.176659	0	0.104263	0.097608	0	0	0.135599	0.231515	0.210446	0.68575	1.22832	0.669589	0.573862	0	0.252944	0.0407615	0.0463193	0	0.210272	0.287143
42	-0.149591	-0.231912	-0.127483	0.190597	0.418376	0.525431	0.492902	0.421242	0.337347	0.432233	-0.0763263	0.415271	0.386929	0.306492	0.157227	-0.114841	0.267083	0.185875	0.0843819	0.0554167		42	0.0762504	0.00865472	0.0765817	0.174274	0.00662523	0	0.107918	0	0	0.17322	0.184764	0.641907	1.16157	0	0.213093	0	0.175684	0.106799	0.224113	0.407888
43	-0.164255	-0.165356	-0.144844	0.140845	0.522255	0.560144	0.450203	0.298344	0.300812	0.416102	-0.0678268	0.392437	0.523171	0.318816	-0.015293	-0.237641	0.0952687	0.231793	0.155529	0.0567655		43	0.0173639	0.178213	0.0904225	0.0837671	0	0.199617	0.476002	0	0	0.187061	0.198605	0.122414	0	0	0.360326	0.20571	0.0463193	0.201066	0.210272	0.0733348
44	-0.146404	-0.0570371	-0.182154	0.100712	0.484131	0.620194	0.489637	0.316583	0.244274	0.443727	-0.110197	0.329677	0.492206	0.322432	-0.0626751	-0.21178	0.0753833	0.274647	0.232425	0.0667829		44	0.258069	0.0865136	0.0765817	0.243839	0	0.185776	0.403121	0.0400108	0	0	0.692701	0.286351	0	0	0.226934	0	0.0162392	0.0125316	0.237954	0.314825
45	-0.144043	-0.108599	-0.174869	0.115392	0.540515	0.51169	0.590612	0.400819	0.145549	0.370711	0.163078	0.431834	0.471049	0.390604	-0.00294847	-0.120003	0.204103	0.293121	0.0961893	0.138358		45	0	0.0752659	0.14071	0.132391	0	0	0.253681	0.1223	0	0	0	0.136255	0.573862	0	0.441699	0.0134603	0.189524	0.12064	0.237954	0.27919
46	-0.093021	-0.132675	-0.160298	0.173974	0.589454	0.564464	0.607557	0.500697	0.245838	0.46586	0.337397	0.484707	0.453866	0.329	0.0830854	-0.200723	0.241877	0.287304	0.239905	0.115731		46	0	0	0.104263	0.132391	0.110136	0.213458	0.607924	0	0	0.68575	0.466414	0.314033	0	0.302564	0.360326	0.0407615	0.0463193	0.038904	0	0.144604
47	-0.100767	-0.139527	-0.150872	0.214825	0.373997	0.581175	0.360813	0.430237	0.257189	0.376044	0.587495	0.506775	0.357978	0.377568	0.0686724	-0.160256	0.324216	0.318964	0.291967	0.207924		47	0.0762504	0.0475842	0.149475	0.139491	0.0824546	0	0.403121	0	0	0	0.692701	0	0.54618	0	0.226934	0.0684432	0.074001	0	0.237953	0.207921
48	-0.110926	-0.15792	-0.177412	0.176075	0.502433	0.517597	0.520401	0.47819	0.17954	0.360413	0.431709	0.435005	0.318352	0.456342	-0.0414561	0.109291	0.358837	0.307058	0.234324	0.186959		48	0.140296	0.230984	0.177156	0.097608	0.185966	0.149713	0.666965	0	0	0.928175	0.466414	0.491811	0.573862	0.130521	0.0381784	0.0957443	0.161843	0.092958	0.419879	0.0733348
49	-0.0873549	-0.137127	-0.165898	-0.0852413	-0.244934	0.211042	0.460831	0.47621	0.279068	0.521253	0.50005	0.45004	0.506357	0.335702	0.169914	0.175461	0.409001	0.264074	0.223325	0.0798595		49	0.0398868	0.00865471	0.00368878	0.000361059	0.0824546	0.0582859	0.225999	0	0	0	0	0.464129	1.16157	0	0.280625	0.0134603	0.074001	0.12064	0.0283465	0.207921
50	-0.0670541	-0.179675	-0.0639191	0.114245	0.488205	0.416741	0.616665	0.598278	0.207108	0.430511	0.482164	0.482365	0.546841	0.36769	0.169929	0.175364	0.40709	0.243891	0.28865	0.20122		50	0.249387	0.0752659	0.213603	0.0628253	0.0343069	0.0222226	0.312721	0	0	0.200902	0.466414	0	0	0.990736	0.0243376	0.0819035	0.0902402	0	0.196431	0.130763
51	-0.0486812	-0.13886	-0.0547885	0.0909191	0.26258	0.39782	0.687492	0.65201	0.268605	0.533485	0.523385	0.618327	0.405669	0.486874	0.124115	0.226675	0.383144	0.18971	0.211043	0.08885		51	0	0.150532	0.0262944	0.0908681	0.220273	0.044445	0.507361	0	0	0	0	0.0947328	0	0	0.119551	0	0.247286	0.12064	0.0283465	0.207921
52	-0.122389	-0.18824	-0.107636	0.0752149	0.168417	0.331648	0.37464	0.540161	0.0988478	0.384428	0.367092	0.560034	0.441064	0.299359	0.28561	0.409062	0.340466	0.260437	0.264947	0.154308		52	0.0312048	0.192054	0.0313705	0.097608	0	0.0222226	0.785046	0	0	0	0.466414	0	1.18925	0.130521	0	0.164568	0.117922	0	0.0843747	0.336619
53	-0.0935161	-0.158063	-0.068823	0.145308	0.113331	0.150862	0.323134	0.528065	0.326221	0.598854	0.239631	0.414044	0.427419	0.465701	0.301307	0.363754	0.448047	0.171987	0.405087	0.301066		53	0.0173639	0.139284	0.0904225	0.11855	0	0.0083817	0.535043	0	0	0.671909	0.96051	0.122414	0	0.288723	0.159402	0.274534	0.175684	0.0527448	0.43372	0.19408
54	-0.0522759	-0.134327	-0.160506	0.109593	0.279728	0.0369564	0.377541	0.65051	0.432505	0.586156	0.352292	0.551896	0.487709	0.397754	0.267637	0.345905	0.502548	0.123032	0.347893	0.214965		54	0.162818	0.139284	0.126869	0.0489845	0.020466	0.0721267	0.121758	0.163067	0	0.187061	0.198605	0.122414	0	0.11668	0.306635	0.0957443	0	0.038904	0.140403	0.0733348
55	-0.0813889	-0.103149	-0.129327	0.170182	0.135674	0.164782	0.269673	0.694245	0.36697	0.356606	0.651411	0.536699	0.556659	0.475509	0.230471	0.443115	0.284966	-0.190721	0.320522	0.263286		55	0	0.0865136	0.149475	0.139491	0.0824546	0	0.225999	0	0	0	0	0.286351	0	0.102839	0.173243	0.0134603	0.074001	0.12064	0.0283465	0.35046
56	-0.116576	-0.210547	-0.12498	0.182712	-0.165738	0.031897	0.142296	0.634427	0.411035	0.548875	0.544764	0.608356	0.552127	0.432253	0.193362	0.430532	0.24261	-0.131899	0.35474	0.277675		56	0.0675684	0.114195	0.104263	0.0628253	0.0343069	0.0859676	0.903127	0.231515	0.210446	0.200902	0.212446	0	0	0	0.199252	0.0407615	0.0463193	0.201066	0	0.180239
57	-0.0508274	-0.144059	-0.188681	0.129199	-0.0232326	0.237592	0.152678	0.512196	0.507087	0.520769	0.541646	0.511084	0.656961	0.316462	0.260735	0.371001	0.184967	-0.101486	0.303934	0.306007		57	0.185341	0.125443	0.113028	0.104709	0	0	0.521202	0.0946183	0	0.415644	0.184764	0.286351	0	0	0.388008	0	0.189524	0.228748	0.51743	0.172286
58	-0.0189952	-0.148289	-0.159324	0.18154	0.20786	0.157315	0.217456	0.368738	0.574942	0.405246	0.513957	0.491367	0.483247	0.382409	0.3855	0.400157	0.275285	-0.17381	0.304233	0.303603		58	0.176659	0	0.177156	0.097608	0.185966	0.213458	0.666965	0	0.525407	0	0.720382	0.314033	0.573862	0.130521	0.159402	0.109585	0.117922	0.106799	0.0145057	0.19408
59	0.00982432	-0.118362	-0.134912	0.184015	0.218229	0.132864	0.271505	0.540968	0.621737	0.473191	0.520914	0.546787	0.534177	0.500065	0.369929	0.33824	0.448319	-0.145281	0.361839	0.353583		59	0	0	0.163315	0.153332	0.0204661	0.00838166	0.23984	0	0.196605	0.429485	0.452573	0	0.560021	0	0.320476	0.164568	0.175684	0.0527448	0.0843746	0.12281
60	0.0141814	-0.133329	-0.148194	0.250176	0.321321	0.224568	0.364187	0.382152	0.539319	0.536745	0.387339	0.470003	0.365261	0.44852	0.266823	0.471916	0.238807	0.13546	0.454299	0.444158		60	0.0900912	0	0.126869	0.25768	0.020466	0.0721267	0.771205	0	0.0706209	0	0.706541	0.300192	1.17541	0	0.414017	0	0.104081	0.092958	0.210272	0.0733348
61	-0.0939095	-0.222007	-0.167433	0.20239	0.243661	0.209322	0.405822	0.491487	0.50087	0.348532	0.61345	0.484593	0.527457	0.44813	0.158918	0.421057	0.196135	0.0185694	0.416473	0.362283		61	0.0762504	0.164372	0.0765817	0	0.158284	0.185776	0.462161	0	0	0	0.946669	0	0.54618	0.102839	0.10571	0.0546023	0.0601601	0.268961	0	0.158445
62	-0.0868482	-0.175347	-0.173084	0.196314	0.352956	0.205656	0.538313	0.437335	0.684061	0.399665	0.636715	0.572104	0.51248	0.381362	0.229496	0.386237	0.0746678	0.229434	0.412404	0.244716		62	0.0537276	0.100354	0.163315	0.362028	0	0.199617	0.416961	0.108459	0.00762879	0.187061	0.198605	0.655748	0	0.11668	0.213093	0	0.0601601	0	0.154244	0
63	-0.132185	-0.190718	-0.0782988	0.232256	0.354577	0.371922	0.416026	0.514233	0.438487	0.441653	0.606221	0.504551	0.507601	0.350061	0.386725	0.295155	0.309936	0.19271	0.232158	0.266008		63	0	0.178213	0.0904225	0.0837671	0	0.0721267	0.416961	0.381497	0	0.671909	0.198605	0	0	0	0.294466	0	0.261127	0.0263724	0	0.150492
64	-0.111545	-0.200055	-0.211906	0.100084	0.415465	0.470613	0.638936	0.522023	0.460939	0.454471	0.595104	0.466372	0.515147	0.246584	0.0849782	-0.0624266	0.251368	-0.18506	0.0729556	0.267189		64	0	0.205895	0.118104	0.0418836	0.123977	0	0.326562	0	0.0983026	0	0	0.505652	0	0	0.119551	0.0684432	0.36281	0.0125316	0.0283465	0.136651

## Sheet: Supplement 1F(middle)
	EGFRp	EGF outside
0	0.0146793	0.0925686
1	0.0471409	0.0749719
2	0.130966	0
3	0.233694	0.0975757
4	0.476061	0.3301
5	0.702226	0.292417
6	0.922736	0.40078
7	0.922783	0.640925
8	0.960582	0.806458
9	0.99523	1
10	1	0.825468
11	0.901154	0.70809
12	0.761335	0.714865
13	0.678921	0.592053
14	0.678549	0.326337
15	0.603771	0.229708
16	0.487368	0.153035
17	0.231382	0.113225
18	0.0641766	0.0230366
19	0	0.0726688

## Sheet: Supplement 1F(bottom)
Angle(rad)	Count
1.57	1
1.26	2
0.94	3
0.63	4
0.31	1
0	1
-0.31	4
-0.63	0
-0.94	1
-1.26	2
-1.57	0

## Sheet: Supplement 1G
	Cell 0	Cell 1	Cell 2	Cell 3	Cell 4	Cell 5	Cell 6	Cell 7	Cell 8	Cell 9	Cell 10	Cell 11	Cell 12	Cell 13	Cell 14	Cell 15	Cell 16	Cell 17	Cell 18	Cell 19
0	0.27077	0	0.212833	0.0765654	0.0759189	0	0	0.0379987	0	0	0.0468397	0.0659227	0.295602	0.188006	0.142339	0.131068	0.142602	0	0.108045	0.0539119
1	0.285227	0	0.137653	0.0524853	0	0	0	0.112232	0	0	0.0530519	0	0.190272	0.197618	0.294715	0.154075	0.0770935	0	0.235991	0.0487973
2	0.280306	0.0531025	0.129341	0.10921	0.0986003	0.0804111	0	0	0	0	0.045082	0	0.126628	0.294021	0.283211	0.0631949	0.0884201	0	0.140728	0
3	0.295522	0	0	0.0414053	0.116209	0	0.0764144	0	0	0	0.1071	0	0.249645	0.287188	0.109075	0.0630473	0.0719523	0	0.104405	0
4	0.250567	0	0	0.0389009	0.0803868	0	0	0	0	0.0478781	0.0626129	0	0.162953	0.274468	0.171676	0.0900755	0.0825972	0	0.0392268	0
5	0.240665	0.136484	0	0.0761194	0.0388989	0	0	0.0513479	0	0	0.0453488	0	0	0.0964952	0.0409373	0	0.0571931	0	0.0562201	0
6	0.203152	0.205639	0.146693	0.110904	0.221714	0	0.052563	0	0	0	0.0565493	0	0	0.086708	0.0611552	0.0438675	0.0241379	0	0	0
7	0.227723	0.19204	0.194864	0.144225	0.609341	0.156505	0.248705	0.121891	0	0.188917	0.117518	0	0	0.174835	0.041897	0.137962	0.199237	0	0.0791367	0.0511204
8	0.123561	0.235975	0.317308	0.241786	0.900187	0.10729	0.325982	0.194098	0	0.0980278	0.107945	0	0.0834706	0.12506	0.0432043	0.1171	0.112069	0	0.0570033	0.0580774
9	0.262905	0.229614	0.247177	0.21702	0.797909	0.133978	0.37467	0.353548	0	0.0511541	0.110223	0	0.145799	0.130347	0.0242853	0.16604	0.0875745	0	0.0467626	0.0736707
10	0.18324	0.170074	0.301542	0.18853	0.390108	0.175243	0.469917	0.266966	0.223427	0.0971039	0.056	0	0.257883	0.208768	0	0.193487	0.121099	0.0395306	0.132021	0.141221
11	0.232361	0.332896	0.258906	0.20947	0.683532	0.0914474	0.439383	0.230769	0.130645	0.0789598	0.104997	0	0.374295	0.141108	0.0246705	0.222897	0.201429	0.0880347	0.111059	0.061499
12	0.30209	0.452552	0.39265	0.205891	0.852487	0.088947	0.622705	0.337342	0.105518	0.16767	0.156663	0	0.366817	0.0678708	0	0.165508	0.0877354	0.208515	0.291016	0.0373593
13	0.452824	0.395136	0.240839	0.230745	0.783966	0.14748	0.624051	0.395504	0.080292	0.158482	0.0487072	0	0.354312	0.127506	0	0.16714	0	0.0716482	0.262384	0.199795
14	0.399235	0.4141	0.410222	0.222778	0.775118	0.151634	0.57591	0.283997	0.173784	0.128408	0.1046	0.00962979	0.285458	0.185267	0	0.198987	0.0798692	0.108662	0.35058	0.252898
15	0.406752	0.275991	0.336675	0.266284	0.730139	0.0789826	0.577294	0.291693	0.114557	0.194705	0.0525015	0	0.407628	0.130387	0	0.215408	0.159374	0.0325348	0.387457	0.34995
16	0.284477	0.473297	0.365705	0.37325	0.871916	0.082544	0.814591	0.340078	0.0877817	0.0891239	0	0	0.366172	0.182068	0	0.247565	0.0387597	0	0.420155	0.329787
17	0.330426	0.485992	0.300877	0.500458	0.919603	0.182192	0.556273	0.109265	0.106834	0.0627962	0.0579078	0	0.540936	0.166852	0	0.322359	0.0787103	0.135737	0.412778	0.27998
18	0.291344	0.414497	0.475405	0.490537	0.787708	0.100749	0.631287	0.185479	0.150446	0.351265	0	0.074876	0.367382	0.161219	0	0.231169	0.110638	0.0706275	0.548751	0.393451
19	0.389073	0.432665	0.496179	0.451311	0.911074	0.140295	0.635326	0.130198	0.08393	0.470128	0.0511182	0.0844794	0.566016	0.18427	0.0296736	0.293416	0.085554	0	0.483313	0.349898
20	0.407089	0.319756	0.446626	0.471455	0.803638	0.25	0.332525	0.219124	0.0483997	0.360896	0.178264	0.0708259	0.542314	0.170106	0.0595369	0.292194	0.0973872	0.0691986	0.365905	0.296371
21	0.230688	0.387231	0.497173	0.483323	0.718009	0.291538	0.503759	0.159344	0.0388533	0.249476	0.107001	0.0794371	0.541349	0.170704	0.0645042	0.426307	0.130709	0.166723	0.328775	0.432137
22	0.297411	0.309641	0.427166	0.487125	0.872187	0.392879	0.5421	0.192667	0.108005	0.14943	0.0505181	0.0979222	0.549287	0.220023	0.0571327	0.458463	0.208948	0.0904836	0.613941	0.366791
23	0.370751	0.446281	0.382759	0.513007	0.570298	0.160813	0.642123	0.118217	0.0445232	0.122839	0.186554	0.0845101	0.583705	0.186942	0	0.321613	0.226562	0.126087	0.36545	0.264141
24	0.280287	0.30104	0.475103	0.503601	0.715999	0.211082	0.790033	0.157377	0.201327	0.287604	0.343525	0.0892938	0.504326	0.179137	0.0233981	0.463031	0.169661	0.112132	0.407442	0.490466
25	0.438577	0.238433	0.449373	0.262454	0.863343	0.309375	0.830796	0.237524	0.168452	0.276398	0.285369	0	0.573141	0.127343	0	0.407195	0.151468	0.0832	0.464421	0.458572
26	0.327688	0.390848	0.358098	0.374656	0.641802	0.228367	0.681752	0.225949	0.127834	0.255161	0.407323	0	0.657831	0.240401	0.0350467	0.421163	0.153619	0.0839818	0.489552	0.255096
27	0.429148	0.433506	0.288889	0.256252	0.694686	0.261255	0.732688	0.0847458	0.155523	0.195666	0.324201	0	0.634783	0.107598	0.081156	0.440949	0.113317	0.0285159	0.548611	0.223705
28	0.343267	0.376293	0.362194	0.267087	1	0.308886	0.676523	0.145171	0.100901	0.379686	0.384099	0	0.699309	0.18424	0.0752143	0.446557	0.21494	0.148867	0.446272	0.182344
29	0.291971	0.375654	0.251462	0.525747	0.85353	0.307799	0.732482	0.264528	0.115856	0.404878	0.387372	0.0840791	0.667287	0.197183	0.0431278	0.397347	0.175631	0.108596	0.411796	0.327904
30	0.36034	0.376246	0.267121	0.213527	0.835705	0.173587	0.764281	0.0837758	0.074223	0.407804	0.493834	0.0411612	0.616564	0.104887	0.0336851	0.383288	0.11962	0.0492177	0.32876	0.247812
31	0.270627	0.490981	0.296875	0.235404	0.914465	0.267655	0.705998	0.0818991	0.0625663	0.399873	0.487707	0	0.514963	0.189503	0.0333601	0.348599	0.23913	0.209211	0.424326	0.353005
32	0.323704	0.426649	0.295738	0.235808	0.848285	0.354701	0.524632	0.0499419	0.192224	0.359085	0.520222	0.0296198	0.642038	0.139934	0	0.432258	0.104967	0.127389	0.398776	0.310213
33	0.388931	0.387684	0.229231	0.235627	0.725683	0.410765	0.753689	0.125149	0.0971326	0.396947	0.497542	0.191963	0.742694	0.106704	0.105714	0.48092	0.30773	0.146317	0.424725	0.202597
34	0.273883	0.418446	0.261612	0.273691	0.847622	0.275125	0.748792	0.0442055	0.102479	0.302311	0.448111	0.0988438	0.6277	0.147702	0.171134	0.553383	0.314533	0.192948	0.415166	0.355568
35	0.328947	0.435974	0.301718	0.241118	0.789372	0.429421	0.65118	0.27518	0.150964	0.351508	0.382114	0.108418	0.649178	0.123846	0.155747	0.589838	0.227778	0.218925	0.523151	0.308017
36	0.288091	0.383952	0.335154	0.189512	0.800197	0.360057	0.614535	0.252608	0.17022	0.281883	0.477683	0.155853	0.486647	0.107709	0.126632	0.376644	0.223581	0.295795	0.549319	0.327886
37	0.370483	0.487247	0.28873	0.219813	0.860676	0.335086	0.690725	0.23186	0.0673203	0.192584	0.361434	0.0965665	0.659941	0.108036	0.100442	0.545598	0.218026	0.217628	0.501799	0.38645
38	0.394021	0.389661	0.364916	0.22031	1	0.361638	0.663982	0.309296	0.0530452	0.295696	0.332847	0.0937121	0.677324	0.230432	0.1389	0.421636	0.220635	0.233393	0.378656	0.513896
39	0.492849	0.313802	0.266293	0.449477	0.900031	0.313024	0.573764	0.214604	0.133653	0.154018	0.366251	0.131391	0.617473	0.192471	0.219036	0.353355	0.247599	0.376548	0.450653	0.408732
40	0.506504	0.316157	0.209094	0.309253	0.829815	0.406154	0.727346	0.319744	0.101112	0.216906	0.304207	0.021833	0.753909	0.201699	0.220466	0.384202	0.239674	0.148472	0.450234	0.472699
41	0.463072	0.33891	0.285452	0.276442	0.934679	0.503788	0.653157	0.262001	0.0471319	0.220814	0.42269	0.0117188	0.706189	0.194915	0.271761	0.426054	0.126333	0.25168	0.402771	0.371662
42	0.619779	0.29459	0.319286	0.305506	0.976148	0.414361	0.827454	0.128563	0.0673631	0.198325	0.425679	0.147145	0.718958	0.201717	0.26656	0.337381	0.17619	0.357143	0.284845	0.224242
43	0.442004	0.277731	0.317902	0.326972	0.931996	0.429091	0.876078	0.17069	0	0.162698	0.477987	0.15998	0.799377	0.141228	0.269885	0.459086	0.215792	0.402909	0.382578	0.35459
44	0.489312	0.243789	0.271281	0.353499	0.949003	0.352897	0.763412	0.252888	0.0879121	0.235055	0.428954	0.153295	0.681652	0.157549	0.227933	0.464735	0.0906217	0.565082	0.400922	0.377011
45	0.494009	0.287184	0.263871	0.249462	0.925939	0.26051	0.625094	0.179314	0.0973638	0.238933	0.392366	0.135821	0.736458	0.192661	0.260031	0.427163	0.25819	0.443195	0.55055	0.356273
46	0.478396	0.329879	0.269917	0.314417	0.938564	0.312896	0.731565	0.348552	0.0871627	0.31123	0.404804	0.186978	0.656423	0.187806	0.212926	0.406044	0.243784	0.288528	0.520065	0.409091
47	0.400938	0.319965	0.275758	0.335294	0.974624	0.346535	0.72767	0.224731	0.0440141	0.30961	0.331756	0.158581	0.721072	0.234607	0.212885	0.367679	0.177863	0.407211	0.463014	0.402238
48	0.425655	0.402887	0.27253	0.379334	0.971875	0.39725	0.772504	0.264112	0.0521647	0.334721	0.30593	0.253567	0.54949	0.152452	0.309202	0.358553	0.219647	0.444694	0.583805	0.603267
49	0.312141	0.345044	0.246887	0.338566	0.951729	0.389319	0.805328	0.286098	0.0998579	0.258555	0.236863	0.152433	0.690166	0.146341	0.314607	0.416082	0.0956175	0.397446	0.487486	0.59133
50	0.450437	0.312338	0.25128	0.351323	0.980306	0.282344	0.634232	0.254422	0.116271	0.180532	0.26594	0.138973	0.609799	0.167872	0.35409	0.350906	0.192853	0.381674	0.481622	0.678832
51	0.538344	0.332908	0.173668	0.36184	1	0.410763	0.539219	0.308166	0.072117	0.222345	0.185084	0.161402	0.682869	0.148033	0.317942	0.408141	0.170872	0.241163	0.42794	0.616446
52	0.321118	0.287997	0.172029	0.356461	1	0.318532	0.575	0.244553	0.0713256	0.215225	0.151754	0.0479721	0.605775	0.0566234	0.276948	0.335874	0.141243	0.267442	0.480608	0.446981
53	0.434684	0.309044	0.110201	0.357576	0.949206	0.31335	0.564608	0.209883	0.0397924	0.270978	0.236689	0.265804	0.678867	0.134921	0.314961	0.363383	0.122979	0.352011	0.345697	0.428497
54	0.510646	0.566542	0.239362	0.381589	0.876275	0.354237	0.65167	0.306301	0.0712644	0.154651	0.218687	0.430667	0.688679	0.0967909	0.264181	0.369939	0.124857	0.534757	0.453095	0.434286
55	0.488159	0.322822	0.237046	0.36717	0.91611	0.340291	0.712036	0.254164	0.0829635	0.0781923	0.285368	0.43772	0.600242	0.105839	0.27566	0.331425	0.122534	0.493787	0.399015	0.557453
56	0.484436	0.348613	0.265362	0.358168	0.914088	0.207934	0.584918	0.228619	0.0626866	0.050152	0.273341	0.246793	0.670662	0.290638	0.378479	0.223188	0.195122	0.285297	0.436634	0.685509
57	0.359107	0.458795	0.193297	0.348101	0.890132	0.309735	0.777248	0.235384	0	0.0422222	0.207981	0.128905	0.526189	0.256674	0.272764	0.240379	0.203317	0.23627	0.405504	0.6919
58	0.422705	0.452206	0.265401	0.366142	0.960116	0.55206	0.691092	0.367828	0.0472441	0.100924	0.293387	0.154582	0.546422	0.164615	0.199262	0.390869	0.281761	0.34037	0.240996	0.637598
59	0.376072	0.570892	0.202604	0.499634	0.966453	0.437647	0.716099	0.371505	0.0749753	0.155055	0.231394	0.185597	0.46369	0.254722	0.349349	0.379665	0.246231	0.332381	0.225449	0.653007
60	0.302648	0.595006	0.187168	0.349905	1	0.341824	0.70315	0.453867	0.11022	0.209677	0.228498	0.226477	0.632198	0.198198	0.32388	0.31197	0.157106	0.253726	0.20517	0.676175
61	0.326177	0.484018	0.295498	0.227019	0.972846	0.503195	0.689142	0.31415	0.0779258	0.0897984	0.1199	0.240238	0.637672	0.185845	0.352723	0.283444	0.131663	0.352182	0.330782	0.628674
62	0.327572	0.509659	0.190098	0.335583	1	0.472291	0.648276	0.376744	0.113571	0.149038	0.388628	0.293378	0.557576	0.205747	0.373116	0.400613	0.0809061	0.365541	0.353067	0.659651
63	0.391954	0.393855	0.232365	0.151847	0.943306	0.322874	0.590487	0.346852	0.142467	0.187115	0.207344	0.317468	0.531365	0.205627	0.357261	0.388831	0.0488294	0.208077	0.377438	0.557639
64	0.369295	0.361855	0.19437	0.214741	0.976992	0.517872	0.649647	0.383303	0.0898876	0.103297	0.24087	0.223943	0.543807	0.16219	0.444632	0.321954	0.0389696	0.478661	0.436105	0.536835
65	0.358804	0.34714	0.251615	0.279207	0.96246	0.405844	0.479902	0.470177	0.197976	0	0.174344	0.297484	0.529516	0.0997403	0.363943	0.394805	0.0468956	0.583718	0.395081	0.619308
66	0.446853	0.391338	0.218189	0.204651	0.948393	0.451349	0.578392	0.311828	0.191161	0.0666667	0.283945	0.165491	0.569926	0.217166	0.45679	0.44824	0.0720423	0.269913	0.30383	0.6
67	0.302562	0.306299	0.274662	0.268594	0.972742	0.490071	0.498214	0.487087	0.271807	0.153807	0.34375	0.224119	0.488044	0.222508	0.446371	0.293386	0.0392548	0.302227	0.483681	0.764579
68	0.312647	0.368106	0.178199	0.269869	1	0.384019	0.493189	0.319724	0.34412	0.257925	0.447005	0.311131	0.592503	0.217303	0.469363	0.295929	0.0490196	0.320015	0.333505	0.71831
69	0.31393	0.297565	0.275323	0.471811	0.851975	0.462528	0.568215	0.384578	0.264083	0.146704	0.416901	0.341486	0.597087	0.114139	0.321651	0.27794	0.154349	0.245401	0.322449	0.754864
70	0.298656	0.26368	0.174761	0.380306	0.904387	0.558587	0.528583	0.285106	0.294653	0.153846	0.387746	0.0702499	0.501208	0.146255	0.399375	0.379376	0.0513834	0.432348	0.294987	0.694933
71	0.297391	0.236884	0.144555	0.308731	0.82418	0.529776	0.404607	0.295181	0.227899	0.213444	0.345291	0.11681	0.326809	0.0631951	0.221134	0.33999	0.0501337	0.319034	0.199225	0.826341
72	0.293413	0.279503	0.25643	0.196984	0.815066	0.584838	0.511905	0.18191	0.278714	0.153982	0.467937	0.0695062	0.35107	0.168362	0.201913	0.202094	0	0.260455	0.300268	0.765957
73	0.300426	0.280986	0.279244	0.360332	0.838602	0.52	0.548926	0.431761	0.308132	0.236794	0.323748	0	0.484973	0.106114	0.149343	0.365586	0	0.209689	0.262321	0.734726
74	0.350507	0.413558	0.242896	0.286295	0.896401	0.569266	0.5978	0.411278	0.246365	0.299257	0.296264	0.0537511	0.536689	0.186874	0.215604	0.259276	0.0504775	0.164643	0.216075	0.632863
75	0.413344	0.318971	0.263158	0.263788	0.849296	0.466012	0.530537	0.410732	0.211926	0.27094	0.2482	0	0.40975	0.100295	0.27687	0.0619236	0.051574	0.248106	0.40613	0.791596
76	0.365377	0.257457	0.236117	0.191764	0.953771	0.554135	0.552161	0.228139	0.192141	0.173457	0.228461	0.0800821	0.452005	0.117188	0.211374	0.0993492	0.106029	0.162338	0.110087	0.782151
77	0.32085	0.424269	0.117647	0.17278	0.921532	0.36627	0.616667	0.24401	0.25	0.17038	0.214013	0	0.366589	0.108643	0.443932	0.145985	0.101429	0.2652	0.246637	0.842813
78	0.510387	0.316677	0.155199	0.239384	0.898183	0.533429	0.724356	0.199314	0.3036	0.205244	0.326539	0.0424383	0.492991	0.125061	0.187766	0.212729	0.0613718	0.118096	0.118913	0.884259
79	0.300364	0.315502	0.230973	0.0848485	0.921399	0.487558	0.501938	0.224894	0.402597	0.31979	0.303678	0.0340599	0.353942	0.240272	0.222154	0.261097	0.109818	0.199323	0.206856	0.838366
80	0.259101	0.258143	0.164336	0.0684932	1	0.464314	0.554638	0.269712	0.393852	0.3579	0.204012	0.0925422	0.402907	0.104543	0.198536	0.263317	0.0711238	0.133586	0.163537	0.608075
81	0.257625	0.243219	0.268979	0.212953	1	0.509327	0.503646	0.320746	0.332965	0.410626	0.206403	0	0.441331	0	0.201888	0.274475	0.0445205	0.26087	0.218507	0.748395
82	0.352312	0.246364	0.22291	0.129466	1	0.526638	0.620929	0.262239	0.341012	0.459392	0.17593	0	0.375573	0.0627144	0.203293	0.267801	0.188993	0.246603	0.134703	0.616372
83	0.451194	0.276099	0.123747	0.154859	0.928303	0.606635	0.650025	0.254054	0.294737	0.388161	0.171555	0	0.429329	0	0.151071	0.193037	0.145942	0.287379	0.199324	0.534676
84	0.191635	0.159627	0.228515	0.0781138	1	0.340845	0.684184	0.223301	0.318393	0.363986	0.133085	0.152876	0.440094	0.0633284	0.160341	0.0915673	0.106072	0.165941	0.103538	0.487275
85	0.237697	0.299188	0.161572	0.223479	0.964859	0.447059	0.714068	0.355863	0.47304	0.281964	0.166461	0.0305942	0.453078	0.0567341	0.174704	0.128992	0.0565611	0.269745	0.0917921	0.483681
86	0.301209	0.340766	0.290873	0.074799	1	0.405133	0.679374	0.235171	0.4935	0.296106	0.209184	0.0291971	0.552398	0.0657765	0.178798	0.0918281	0.112299	0.250619	0.335494	0.320148
87	0.277137	0.271773	0.253755	0.100972	0.940932	0.455292	0.588645	0.195109	0.434176	0.365843	0.137199	0.0884068	0.447709	0.0585899	0.18998	0.144604	0.0900369	0.189858	0.373521	0.322394
88	0.321929	0.337916	0.273555	0.0986501	0.976865	0.395131	0.505092	0.276956	0.468085	0.34287	0.0956159	0.213441	0.316763	0.0618908	0.154703	0.084753	0.0808157	0.136877	0.179415	0.316596
89	0.365089	0.306764	0.207288	0.0687603	0.954756	0.400376	0.416709	0.210152	0.464618	0.244924	0.137286	0.241334	0.377515	0	0.175	0.0938442	0.0953113	0.13509	0.188147	0.303859
90	0.279854	0.311792	0.206226	0.0800648	0.888676	0.419021	0.473051	0.22759	0.39478	0.253197	0.0884462	0.130548	0.379895	0.0676543	0.172578	0.0440359	0.150999	0.0561991	0.212741	0.28735
91	0.213496	0.351132	0.258851	0.0476958	0.899889	0.295276	0.442827	0.243784	0.424111	0.227025	0.138754	0	0.338895	0.0565578	0.17032	0.0433684	0.125561	0.0705831	0.227988	0.559796
92	0.33178	0.322425	0.264741	0.0632746	0.848956	0.292498	0.512807	0.235577	0.268527	0.194159	0.0405351	0	0.373806	0	0.120899	0.103434	0.193165	0.112069	0.303104	0.500952
93	0.40201	0.260585	0.251185	0.0637821	0.734555	0.277027	0.463008	0.202532	0.345395	0.192776	0.0571086	0	0.354802	0	0.135159	0.107357	0.171263	0.0998632	0.126004	0.388134
94	0.392236	0.237195	0.244461	0.207898	0.776692	0.213505	0.51709	0.165984	0.384071	0.232454	0.0665331	0.0244656	0.409396	0.123077	0.161974	0	0.24	0.2114	0.2458	0.414293
95	0.317988	0.273849	0.202001	0.148124	0.822876	0.220984	0.604747	0.266632	0.25348	0.220488	0.155137	0	0.37746	0.113092	0.150442	0	0.215137	0.0548755	0.28092	0.299129
96	0.347187	0.203471	0.222607	0.112265	0.814981	0.204831	0.616612	0.191702	0.344503	0.266667	0.0574572	0.0321765	0.368921	0.063285	0.243197	0	0.215765	0.109974	0.266386	0.2666
97	0.313947	0.295924	0.23795	0.133397	0.6673	0.233533	0.48238	0.197731	0.415056	0.209671	0.0349762	0.0236147	0.42831	0	0.210435	0.0482788	0.23913	0.101821	0.232205	0.384203
98	0.409091	0.159236	0.292504	0.124729	0.714517	0.228346	0.560414	0.405967	0.233831	0.201915	0.0357995	0	0.317365	0.0592384	0.126031	0.100166	0.251509	0.109183	0.287418	0.307176
99	0.27781	0.131987	0.23125	0.0860823	0.842204	0.361386	0.540033	0.225719	0.133655	0.255633	0.0649903	0	0.340451	0.20546	0.161041	0	0.170912	0.0881226	0.261146	0.38878
100	0.260779	0.286496	0.208696	0.146239	0.710834	0.404234	0.603382	0.344886	0.225511	0.0833688	0.0361685	0.0264151	0.352096	0.184993	0.166811	0	0.227582	0.118739	0.282817	0.458758
101	0.236216	0.218871	0.182643	0.155235	0.593266	0.533854	0.438095	0.404584	0.178256	0	0.0846774	0.0282676	0.32965	0.118605	0.23272	0.04806	0.249668	0.0768551	0.404558	0.352733
102	0.240836	0.206715	0.1917	0.182443	0.685039	0.567901	0.396951	0.29	0.203753	0.125975	0.0396983	0.0302436	0.308168	0.0668524	0.186963	0.0846934	0.133101	0.151474	0.478856	0.335434
103	0.22775	0.315143	0.0531873	0.185391	0.552521	0.500949	0.299292	0.309284	0.206484	0	0.0331492	0	0.357055	0.0730443	0.199266	0	0.142359	0.166446	0.219351	0.179812
104	0.22743	0.166906	0.207258	0.180338	0.768938	0.194584	0.297533	0.324902	0.272461	0.0979945	0	0	0.237893	0.123923	0.240634	0	0.315753	0.140695	0.374773	0.0931373
105	0.335757	0.0670836	0.129426	0.17433	0.71014	0.164835	0.340653	0.252427	0.0866142	0.0580777	0.0421546	0.13977	0.250597	0.174649	0.212667	0.055336	0.0909713	0.0621946	0.339782	0.39909
106	0.350883	0.0623391	0.191961	0.205864	0.490421	0.206897	0.323485	0	0.0488095	0.168623	0	0	0.265152	0.111598	0.208062	0.0686752	0.200828	0.0728177	0.267111	0.191034
107	0.408848	0.113796	0.0872401	0.21422	0.452065	0.350594	0.4	0.115965	0.0987362	0.171697	0.0396733	0	0.246984	0.129711	0.210208	0	0.165385	0.0564366	0.312655	0.198837
108	0.342668	0.10444	0.172443	0.189283	0.494879	0.52815	0.433071	0.218882	0	0.0785847	0.052212	0	0.305085	0.130226	0.232761	0	0.227658	0.080285	0.110675	0.193242
109	0.315481	0.143152	0.169739	0.16672	0.499629	0.474174	0.413999	0.193565	0	0.0470633	0.0507132	0.0268071	0.296149	0.105139	0.191406	0	0.304498	0	0.134027	0.30182
110	0.287491	0.152572	0.0758738	0.147176	0.481079	0.326693	0.428571	0.215768	0.0632613	0.037594	0.0485164	0.0569498	0.303911	0.0671882	0.183478	0.0539107	0.286191	0	0.0884442	0.393956
111	0.323979	0.161841	0.164579	0.161837	0.575937	0.231603	0.342205	0.260104	0.285956	0.0815155	0.0526951	0	0.400222	0.0753769	0.291606	0.0489389	0.252033	0.127863	0.0896255	0.191304
112	0.337746	0.242093	0.158943	0.214358	0.519807	0.314787	0.437926	0.227886	0.113254	0.108585	0	0	0.471864	0	0.159182	0.0981595	0.114306	0.0978311	0.208845	0.199539
113	0.376812	0.103854	0.210665	0.231105	0.579616	0.251238	0.552277	0.190844	0.263403	0.0738766	0.0525677	0	0.547293	0	0.168162	0	0.194969	0.0564784	0.348548	0.169811
114	0.296057	0.0448515	0.162357	0.1034	0.578459	0.180193	0.496935	0.204905	0	0.0817684	0.0199106	0	0.483536	0	0.1489	0	0.228404	0.198682	0.272832	0.115338
115	0.222615	0.0964037	0.205426	0.110345	0.608566	0.241967	0.403298	0.218886	0.0930678	0.078656	0.0424317	0.0841215	0.339265	0.0726676	0.138648	0	0.213545	0.0901246	0.343327	0.0563725
116	0.311799	0.183026	0.183155	0.241451	0.598039	0.379972	0.515304	0.269452	0.0499238	0.0394402	0.050861	0	0.307337	0.0559441	0.166522	0	0.366911	0.0840134	0.362821	0.10029
117	0.286797	0.171174	0.062308	0.27678	0.573796	0.293426	0.374312	0.302844	0.0982906	0	0.0475624	0	0.185625	0.0731707	0.205196	0	0.238427	0.138032	0.181522	0.118436
118	0.308685	0.264319	0.0790167	0.0955372	0.562704	0.355646	0.383764	0.296473	0.0786793	0	0.0168429	0	0.370111	0.0645765	0.169749	0	0.339844	0.09526	0.216955	0.12068
119	0.264018	0.451163	0.0649804	0.105177	0.673806	0.39205	0.453036	0.379607	0.197199	0	0.0313741	0	0.361013	0.0680241	0.242521	0	0.342015	0.158398	0.454387	0.210169
120	0.295066	0.371354	0.0637191	0.188885	0.568989	0.484743	0.195706	0.219952	0.22367	0.043299	0.0399845	0	0.346811	0.0719853	0.115896	0	0.309198	0.0710407	0.378721	0.110415
121	0.35081	0.306338	0.0657093	0.147202	0.610162	0.409928	0.322967	0.234951	0.080574	0	0.0392157	0	0.371512	0.0742278	0.156766	0	0.325714	0.0516279	0.291074	0.165901
122	0.326183	0.352259	0.0627998	0.150082	0.61878	0.376801	0.412822	0.294208	0.366299	0.0361446	0.0805085	0	0.216637	0.126437	0.213429	0	0.317241	0	0.403879	0.0446533
123	0.257288	0.0810164	0.0643564	0.194882	0.489498	0.422012	0.353562	0.313196	0.158505	0.0298947	0.0800924	0	0.246707	0.0646211	0.168475	0.0658571	0.16459	0.0551039	0.308713	0.0221823
124	0.126289	0.185451	0.065	0.318166	0.40116	0.482687	0.44657	0.275782	0.212257	0.05629	0.146522	0	0.227326	0.0590973	0.106964	0	0.384997	0.079947	0.313869	0.077784
125	0.213176	0	0.0704805	0.289905	0.689535	0.433355	0.563092	0.0505451	0.250924	0.0915342	0.103462	0	0.15549	0.0678042	0.140925	0.12394	0.314024	0.106364	0.123653	0.10018
126	0.215716	0.0275256	0.0586257	0.304244	0.563541	0.507581	0.336735	0.289086	0.384236	0.0273915	0.143819	0.0602122	0.304559	0.0731164	0.140443	0.04689	0.252839	0	0.174687	0.133141
127	0.201165	0.0344526	0.0472727	0.311134	0.606477	0.391866	0.329957	0.284128	0.320669	0.0253807	0.134746	0.0868984	0.273499	0.0744632	0.127565	0.0772574	0.221701	0	0	0.0658307
128	0.144597	0.0448485	0.0351986	0.294118	0.550241	0.408432	0.165475	0.147753	0.178411	0.0670732	0.0212595	0	0.193342	0.07399	0.107345	0.106815	0.183651	0	0	0.0693985
129	0.175973	0.101998	0.0395766	0.292392	0.501797	0.470242	0.302782	0.24849	0.126428	0.0333195	0.132282	0	0.252196	0.0698198	0.0806882	0	0.283176	0	0	0.120377
130	0.0831361	0.128372	0.056281	0.312256	0.494176	0.402676	0.215062	0.166902	0	0.0663587	0.0761301	0	0.274876	0.0749436	0.113432	0.0407478	0.20684	0	0	0.0850316
131	0.0856401	0.105575	0.0583908	0.27289	0.442124	0.407666	0.237789	0.288726	0	0.0390824	0.126367	0	0.301361	0.0635786	0.111981	0.079396	0.234334	0	0.110742	0.0977496
132	0.0782734	0.174672	0.0173042	0.269395	0.407084	0.365953	0.409283	0.35175	0.0855365	0.0341734	0.12796	0.0605642	0.198427	0.0658251	0.128541	0.16839	0.246162	0	0.0990433	0.0370117
133	0.138453	0.109006	0	0.271567	0.475615	0.257516	0.29859	0.163068	0.0560748	0	0.145016	0	0.143772	0.0662403	0.0964833	0.104657	0.232223	0.0201973	0	0.0349206
134	0.165545	0.181256	0.0216138	0.224526	0.466758	0.268264	0.395225	0.16238	0.124559	0	0.226423	0	0.277814	0.0631769	0.203854	0.124413	0.336396	0.0527534	0	0.106297
135	0.122081	0.118572	0.119848	0.234873	0.235853	0.283523	0.347556	0.157995	0	0	0.108174	0	0.215772	0.0696087	0.125942	0.103465	0.300581	0.0879808	0.277819	0.198653
136	0.130872	0.0568281	0.0136861	0.165348	0.386612	0.302392	0.396055	0.180684	0.28389	0	0.0828772	0	0.162055	0.0681818	0.175038	0.0563515	0.271143	0.185254	0.049936	0.0778761
137	0.0953837	0.0666476	0.0421053	0.129657	0.279185	0.236471	0.254601	0.185869	0.10963	0.0332673	0.0574257	0	0.212349	0.0799265	0.199753	0.0788201	0.15082	0.16221	0.123127	0
138	0.126782	0.0639452	0	0.168821	0.380333	0.233866	0.191915	0.0302326	0.271632	0.0414922	0.091086	0	0.196927	0.0796253	0.197957	0.0859223	0.157867	0.13442	0.127457	0.0933108
139	0.0904776	0.100494	0.0326493	0.0861561	0.22141	0.338795	0.179008	0.0637907	0.109007	0.0542462	0.0610746	0	0.104437	0.148354	0.159581	0.029822	0.157692	0.20523	0.193608	0.0298507
140	0.0930024	0	0.0378505	0.104243	0.29882	0.133106	0.29272	0.0328317	0	0	0.0837716	0	0.122657	0.0678754	0.183529	0.0427729	0.0587024	0.148666	0.269424	0.0307951
141	0	0	0.0518061	0.106884	0.320973	0.214326	0.298158	0.0259681	0	0.0387025	0.062963	0	0.152361	0.0726612	0.239166	0.0655898	0.0607708	0.135257	0.1875	0.0362663
142	0	0.0498985	0.0297952	0	0.334291	0.217152	0.238627	0	0.05671	0.0423949	0.0580973	0	0.125934	0.0724438	0.191271	0.0373098	0.0731707	0.232291	0.0835972	0.179472
143	0	0.0327131	0.0985245	0.0424265	0.235326	0.332341	0.282547	0.0854888	0.0467811	0	0.0444361	0	0.101045	0.118597	0.0496815	0.0317538	0	0.0408074	0.288793	0.0415134
144	0.0553429	0	0.0612722	0.0605825	0.199897	0.362668	0.251986	0.145463	0	0	0.0470016	0.0612951	0.0709677	0.0723961	0.157433	0.07846	0.158421	0.138654	0.083383	0.215254
145	0.0920897	0	0.0427553	0.127635	0.35	0.18847	0.115183	0.0753198	0	0.0434439	0.097891	0	0.207456	0.0658879	0.129854	0	0.0715778	0.0544098	0.0894569	0.0578831
146	0	0	0.0336862	0.054769	0.415698	0.254218	0.156826	0.0528889	0	0.0515904	0.0863655	0	0.234104	0.061959	0.152773	0.108739	0.0865936	0.0380245	0.0620774	0.112717
147	0	0.0893921	0.0381232	0.0973797	0.368466	0.253681	0.118849	0.0913636	0	0.0555768	0.0579604	0.107163	0.210744	0	0.112816	0	0	0.0477408	0.0430438	0.204465
148	0	0	0.0156171	0	0.573352	0.262685	0.114754	0	0.0768592	0.0493409	0.0473506	0	0.204928	0.0717222	0.199676	0.030572	0.0624685	0.0967462	0	0.0691358
149	0	0	0.0829832	0.084998	0.478154	0.288306	0.169851	0.0541072	0	0.0490232	0.0607755	0	0.145356	0.126187	0.111776	0.0437186	0	0	0.0378634	0.0810988
150	0	0	0.106667	0.199533	0.451292	0.353264	0.0595888	0	0.0369618	0	0.0693537	0	0.101767	0.0520548	0	0.0826572	0.175351	0	0.0805886	0
151	0	0.0653341	0.0838646	0.221039	0.550962	0.368706	0.121121	0.0903166	0.0579588	0	0.065516	0	0.0726832	0	0.0665167	0.0554169	0	0.0623269	0	0.0823151
152	0	0.116203	0.0944689	0.179975	0.526892	0.415074	0.0931006	0.0832527	0	0.0483441	0.0779817	0	0.180871	0.0398148	0	0.0339069	0	0.0687606	0	0.139691
153	0.0608724	0.108534	0.0357863	0.185833	0.367357	0.324153	0.0577835	0.152771	0	0.0331934	0.0424284	0	0.312422	0	0.0551156	0.0399803	0	0.0813239	0	0.102594
154	0	0.193655	0.0770823	0.18829	0.400742	0.315128	0.186614	0.137536	0	0.0276283	0.0502618	0.0738385	0.294955	0	0.0891277	0.0995498	0	0	0	0.0275284
155	0.0524272	0.323642	0.095666	0.185419	0.318138	0.359474	0.250692	0	0	0	0.0398027	0	0.247312	0	0.0291708	0.0634518	0.0349684	0	0	0
156	0.0732422	0.205804	0.0474138	0.218526	0.376735	0.335958	0.216692	0.0701021	0	0	0.0341023	0	0.312421	0.0708955	0	0.118389	0	0	0	0.0424354
157	0.216464	0.256456	0.0475162	0.21303	0.343376	0.303734	0.0585586	0.119905	0	0	0.041481	0.05076	0.242079	0.0729893	0.0886248	0	0	0	0	0.0336943
158	0.246656	0.17552	0.0661111	0.201846	0.295748	0.299732	0.12232	0.0720514	0	0	0.0284211	0	0.149291	0.13973	0	0.0450589	0	0.0863341	0	0.0994441
159	0.138745	0.11153	0.108475	0.237171	0.342396	0.3036	0.105729	0.100463	0	0	0.0515901	0	0.132832	0.0624413	0.062543	0.0873096	0	0.0973882	0	0.103527
160	0.0632334	0.156584	0.0380901	0.299956	0.51075	0.244216	0.0470538	0.0755729	0	0	0.104122	0.0347512	0.114268	0.0832937	0.0840249	0.157143	0	0.038009	0	0.0509383
161	0.0635226	0.0395913	0.134423	0.208007	0.498789	0.246399	0.0206926	0.0642202	0.0861101	0.0335937	0.0432624	0.0404594	0.157704	0.0718232	0	0.096841	0	0.0930431	0.0518417	0.0643828
162	0	0.0543234	0.0640129	0.197444	0.391489	0.225654	0	0.129779	0	0	0.0262069	0	0.150828	0.132435	0	0.0652975	0	0.0599676	0	0.107922
163	0.0708738	0.0528801	0	0.19627	0.458253	0.231714	0	0.10104	0	0	0.0589698	0.0515737	0.152992	0.145843	0.0547264	0.119433	0.0378038	0.0503273	0	0.181034
164	0.0642557	0.0455797	0.0698052	0.191619	0.542089	0.237297	0	0.153773	0	0	0.0275198	0	0.150599	0.23	0	0	0.0370036	0.116232	0	0.182478
165	0.0673014	0.13169	0.0789177	0.158558	0.484579	0.416459	0.028021	0.0512367	0	0	0.0566294	0.0417762	0.192741	0.195579	0	0.0356068	0	0.0520161	0.0930556	0.0917327
166	0.0689097	0	0.0553267	0.154561	0.531539	0.338292	0	0.10924	0	0.0614203	0.0257365	0	0.180025	0.212063	0	0.0425213	0	0.060778	0	0.0671729
167	0.0641711	0	0.0838672	0.181383	0.533093	0.324298	0	0.131671	0	0	0.0249916	0	0.150702	0.225543	0	0.0583756	0	0.0211468	0.0499638	0
168	0	0	0.0945105	0.239875	0.379649	0.2589	0.0542089	0.10559	0	0.0414763	0.0245114	0	0.138838	0.120127	0.140187	0.201135	0	0.153969	0.0495196	0.0729412
169	0.168787	0	0.0282609	0.16366	0.65045	0.352442	0.05103	0.0539097	0	0	0.0357498	0	0.140187	0.213699	0.0938329	0.170732	0	0.101695	0.11997	0.0876351
170	0.256779	0.0797721	0.107123	0.149146	0.527505	0.320988	0.0666667	0.0309041	0.0371983	0.0556971	0.0363276	0	0.248153	0.25761	0.153689	0.181865	0.0429952	0.0961207	0	0.0381062
171	0.222812	0.0734892	0.0889409	0.173742	0.476549	0.346893	0	0	0	0.0450715	0.045	0	0.157828	0.103872	0.0835801	0.173285	0	0.0581986	0.0594679	0
172	0.119024	0.116258	0.116086	0.236707	0.48522	0.267927	0.0771855	0.037037	0	0.0484171	0.0248691	0	0.15132	0.260336	0.12089	0.181253	0	0	0	0
173	0.101153	0.122411	0.0551839	0.204925	0.435315	0.274939	0	0.0430153	0	0.0452354	0.0232633	0	0.119157	0.0998553	0.0917956	0.126562	0	0.0682819	0	0
174	0.109195	0.124164	0.0700496	0.072493	0.472812	0.31769	0.206494	0.053542	0	0.045283	0.0152202	0	0.153242	0.140825	0.0892034	0.149371	0.0421716	0.0744636	0	0.111931
175	0	0.212142	0.0911136	0.165303	0.552695	0.238768	0.152735	0	0	0	0.0545217	0	0.148771	0.113658	0.0898987	0.121375	0.0438513	0	0	0.126238
176	0	0.155412	0.0466189	0.20409	0.425083	0.25935	0.087766	0	0	0.0280553	0.054872	0	0.115971	0.160639	0.144673	0.0282065	0.046309	0.0591659	0.0989194	0
177	0.0516322	0.12841	0.0836257	0.172782	0.478279	0.388188	0.0792873	0.0327654	0	0.0451215	0.0292378	0	0.117123	0.120601	0.150937	0.0884097	0	0	0.0602116	0
178	0.142332	0.202922	0.0615385	0.135481	0.513271	0.345648	0.0854626	0.0564444	0	0.0313492	0.0453306	0	0.173118	0.0509346	0.139803	0.0542677	0.0425729	0	0.0919732	0
179	0.0664418	0.208333	0.0785797	0.118493	0.498531	0.348748	0.0889284	0.0594452	0	0.0352141	0.133745	0	0.166078	0.197473	0.199095	0.0476448	0.0466445	0.0304735	0.0455655	0.0683863
180	0.129212	0.146711	0.0447059	0.182979	0.482217	0.303486	0.138963	0.0646573	0	0	0.130895	0	0.135828	0.242095	0.144728	0.119124	0	0.018596	0.0477346	0.0717703
181	0.0470348	0.15747	0.0500874	0.165675	0.460532	0.322638	0.197469	0.0608529	0.06914	0.0699605	0.198516	0	0.110661	0.122098	0.163829	0.108311	0	0	0.0460905	0.158122
182	0	0.0538605	0.0938567	0.192308	0.444683	0.294118	0.189394	0.0501672	0	0.0639159	0.0558539	0	0.151084	0.118949	0.139212	0.108954	0	0.0831142	0	0.175055
183	0	0.0640197	0.0763697	0.139516	0.502695	0.21315	0.137668	0.0538272	0	0.0330547	0.0747395	0	0.153378	0.0453118	0.128778	0.0522067	0.0418233	0.113265	0.0557377	0.208607
184	0.0447903	0.0758089	0.10749	0.242665	0.432968	0.0711207	0.139785	0.111386	0	0	0.0107373	0	0.180295	0.112254	0.0967136	0.20528	0.0291829	0.131476	0.109285	0.0715096
185	0	0.110572	0.118176	0.171839	0.466201	0.0934363	0.0846638	0.111391	0	0	0.0292241	0	0.226994	0.206623	0.126247	0.106522	0.0378937	0.074973	0.0473029	0.100058
186	0.0420141	0	0.097622	0.257066	0.546791	0	0.179728	0.0973783	0	0	0.0216655	0	0.204499	0.129344	0.14661	0.281813	0	0.0760357	0	0.0858453
187	0.0658436	0.0614849	0.110706	0.160911	0.477032	0	0.205435	0.0967565	0	0.0402488	0.036833	0	0.115232	0.200998	0.131942	0.0253968	0	0.0601901	0.0945395	0.0569977
188	0.0423515	0	0.0821449	0.318182	0.517857	0	0.207507	0.0917582	0	0.0869066	0.08442	0	0.20082	0.205277	0.136292	0.160994	0	0	0.0652699	0.0709579
189	0	0.0559303	0.0967933	0.178725	0.452421	0	0.175512	0.136339	0	0.0641509	0.0397124	0.0493969	0.188835	0.187054	0.135897	0.106949	0	0	0	0.128958
190	0.133525	0.0580357	0.0675444	0.140696	0.498943	0.118656	0.102104	0.117904	0.0590278	0.0795012	0.0722071	0	0.222834	0.270701	0.135474	0.145425	0	0	0.0611111	0.175355
191	0.134565	0	0.0675597	0.108957	0.51666	0	0.0964646	0.0499719	0	0.108919	0.0391231	0	0.218093	0.169141	0.144514	0.131808	0	0.0525518	0	0.162912
192	0.0970199	0.0351673	0.134838	0.10997	0.40818	0	0.1035	0.103632	0	0.0756988	0.0256924	0.0738215	0.164969	0.236111	0.11848	0.0760171	0	0.0339929	0	0.0740093
193	0.0712621	0.0949246	0.144936	0.0652615	0.462803	0.060276	0	0.146434	0	0.0638978	0.023794	0.0318599	0.290795	0.17005	0.137287	0.0893617	0.0255255	0.0650948	0	0.140351
194	0.147413	0.124544	0.116923	0.181855	0.428167	0.100472	0.03485	0.114153	0	0.0962087	0.0325016	0.0287403	0.15395	0.177244	0.139182	0.108614	0.0273644	0.0265	0.127743	0.166071
195	0.103951	0.170351	0.108763	0.0882714	0.476485	0	0	0	0	0.0709076	0.0353519	0	0.286667	0.21796	0.115922	0.175589	0	0.029822	0.101931	0.135135
196	0.0436893	0.169966	0.0733945	0.168294	0.478518	0.0491694	0	0.0425974	0	0.0709677	0.028169	0	0.341216	0.173418	0.0669511	0.172432	0	0.0808893	0.122671	0.0831909
197	0.115817	0.138684	0.0699816	0.14359	0.511941	0.171647	0	0.112378	0	0.107764	0.0372124	0	0.263194	0.180291	0.0828895	0.0732759	0	0.0413625	0.123019	0.162342
198	0.0671791	0.245395	0.137326	0.193398	0.430904	0.137117	0	0.217619	0.0817243	0.0633333	0.0332654	0.0364668	0.300813	0.230242	0	0.137987	0.0265	0.024512	0.157935	0.065513
199	0.0731374	0.203012	0.0758377	0.135573	0.39167	0.0471204	0	0.172991	0	0.109505	0.0441176	0	0.258295	0.0459509	0	0.17319	0	0	0.115413	0.0651221
200	0.0699349	0.15954	0.0486518	0.131622	0.409196	0.0264201	0	0.17288	0	0.114298	0.0336106	0.0593952	0.291613	0.0509408	0	0.212513	0	0.0669111	0.276065	0.0517346
201	0.136489	0.117612	0.12058	0.133648	0.44645	0	0.0300885	0.122306	0.0276517	0.0859167	0.0176667	0	0.186928	0.236564	0	0.197872	0.0703686	0.107062	0.0949275	0
202	0.17119	0.120159	0.0805489	0.160563	0.47812	0.0201638	0.0394004	0.285175	0	0.0424794	0.0328669	0	0.233042	0.114623	0.0707846	0.129863	0.137881	0.133208	0.167401	0.110281
203	0.206327	0.0608295	0.102888	0.183055	0.428571	0	0.107253	0.138875	0.0270825	0.0565022	0.0134868	0.0173669	0.224082	0.120983	0.0331214	0.1184	0.0307933	0.0369318	0.106887	0.0521739
204	0.148385	0.20923	0.0751654	0.223134	0.315729	0.0459849	0.0866817	0.147303	0.0689791	0.0560404	0.0152976	0.0274758	0.25228	0.152122	0.0817133	0.123208	0.0462338	0.120681	0.220881	0.123894
205	0.151808	0.318126	0.0745074	0.255733	0.298127	0	0.0751498	0.230689	0.0867367	0.0621415	0.0217683	0.018156	0.129838	0.126241	0	0.0998407	0.0918114	0.0528736	0.255109	0.0453225
206	0	0.383678	0.0626536	0.221065	0.309018	0.0817039	0.0773245	0.214323	0.138912	0.0500459	0.0221923	0	0.125989	0.128518	0.0402355	0.0955145	0.0853127	0.0791168	0.141905	0
207	0	0.195836	0.0889474	0.236905	0.295997	0.0833333	0.0557674	0.174787	0	0.0687382	0.0418176	0.0172707	0.18271	0.114937	0	0.0376658	0.109616	0.0273843	0.216273	0.0390764
208	0.0750947	0.121593	0.0699541	0.265773	0.249406	0.115702	0.067299	0.189052	0	0.0358322	0.0706941	0.0806967	0.122166	0.176306	0	0.0810526	0.0834176	0	0.171468	0
209	0	0.179834	0.0587903	0.145251	0.329525	0.0875	0.0658879	0.267179	0.084684	0.0333824	0.0608838	0.15024	0.137306	0.172702	0	0.108395	0.135519	0	0.200397	0
210	0.0706971	0.144462	0.111509	0.177432	0.32356	0.110394	0.174119	0.220871	0	0.0322266	0.0613802	0.0821122	0.236453	0.179765	0.033697	0.125668	0.0584767	0.0580087	0.17141	0.0647572
211	0	0.201615	0.112736	0.164687	0.280689	0	0.0317604	0.232776	0.100442	0.0365915	0.0321368	0.0332287	0.131098	0.123611	0.0359595	0.0367261	0.0763322	0.0690265	0.135942	0.114577
212	0	0.141147	0.130695	0.147373	0.253419	0.022742	0.0759091	0.184339	0.158868	0.0679901	0.143385	0.0345109	0.134846	0.104408	0	0.130591	0.119549	0.0673832	0.188358	0
213	0.150063	0.38144	0.0944785	0.202331	0.356881	0.0426789	0.0338433	0.245763	0	0.0704501	0.118105	0.0961223	0.0986801	0.104081	0.0370968	0	0.121118	0	0.191446	0
214	0.259212	0.118473	0.0670927	0.23228	0.310384	0.11541	0.194799	0.149583	0	0.0337395	0.0895376	0.0938113	0.166667	0.18	0	0.143528	0	0	0.319407	0.0743282
215	0.209688	0.199443	0.0838548	0.18824	0.402799	0	0.185112	0.278785	0	0.0900519	0.15	0.093435	0.104222	0.136744	0	0.139619	0.0701938	0.0575157	0.275531	0.0889488
216	0.226773	0.231644	0.118454	0.185251	0.4453	0	0.0387524	0.19476	0	0.0316132	0.0521075	0.04668	0.101804	0.0492794	0.0270903	0.117168	0.08101	0.0747992	0.296496	0.113535
217	0.106631	0.192466	0.0601685	0.138164	0.344209	0	0.0816619	0.181908	0	0.114843	0.198967	0.0240609	0.123046	0.0990237	0	0.116983	0.044317	0.197241	0.157723	0.092603
218	0.057971	0.113242	0.0430365	0.219215	0.374089	0.0253521	0.109727	0.246384	0	0.0332734	0.184532	0.0571569	0.183594	0.150369	0	0.124084	0.0797792	0.0307549	0.0421456	0.127389
219	0.240943	0.194682	0.0912409	0.274143	0.340824	0.064538	0.115583	0.328927	0	0	0.154953	0.0384942	0.162433	0.20629	0	0.0648051	0.0956215	0.0433905	0.0588235	0.0406644
220	0.165318	0.343236	0.109432	0.272017	0.358185	0.0175809	0.203998	0.187793	0.068564	0	0.205607	0	0.16875	0.160167	0	0.0666667	0.0792839	0.0416876	0.0376119	0.0337268
221	0.106113	0.217076	0.0706692	0.30888	0.313002	0	0.137135	0.253382	0	0.08	0.272629	0.0310235	0.145965	0.154773	0.0353602	0.0414534	0.105076	0.0483473	0.0904325	0.0604678
222	0.121096	0.184855	0.16129	0.264832	0.196728	0.0454237	0.172529	0.306667	0	0.038874	0.155492	0.0882621	0.0981912	0.104393	0	0.0638733	0.0885496	0	0.0472103	0.0666259
223	0.0725608	0.149673	0.0756881	0.275326	0.153569	0.0455472	0.050515	0.347921	0	0.0997743	0.103315	0	0.102445	0.17412	0.0349815	0	0.042735	0.0534351	0.084118	0.168598
224	0.0520472	0.170671	0.0586812	0.251031	0.24208	0.0895522	0.066988	0.367209	0	0.113346	0.110798	0.0527959	0.196839	0.203268	0.0395137	0.0341515	0.0958549	0.138915	0	0.0849443
225	0	0.177504	0.249686	0.359968	0.10956	0.0434183	0.153431	0.385011	0	0.0977242	0.210099	0.0282962	0.105929	0.193314	0	0	0.0508287	0.107636	0.117254	0.139549
226	0.0686695	0.262524	0.171572	0.390196	0.111915	0	0.122302	0.289742	0.0425981	0.102916	0.0960854	0	0.164566	0.277482	0.0697345	0	0.0922996	0.0907497	0.0733945	0.13795
227	0.0680702	0.178674	0.152919	0.381484	0.106626	0.0657627	0.154203	0.242188	0	0.0355156	0.0940359	0	0.148026	0.156403	0.0397422	0.0476939	0.0981405	0.149068	0.0730878	0.0747018
228	0.114255	0.123167	0.186269	0.301894	0.0974111	0.121086	0.111111	0.0640871	0	0.029399	0.184582	0.0852488	0.114386	0.157484	0	0	0.0951363	0.194036	0.13945	0.129855
229	0.191113	0.110178	0.0425287	0.328609	0.108686	0.113221	0.115364	0.209472	0	0	0.128504	0.0668237	0.213444	0.274306	0	0.0495471	0	0.201637	0.0738535	0.154613
230	0.249631	0.271688	0.172671	0.37476	0.0995069	0.0547196	0.140815	0.139605	0	0.0277537	0.210049	0	0.227961	0.199309	0	0.0881732	0.0787234	0.0652361	0.123798	0.0905091
231	0.307976	0.181517	0.171666	0.385062	0.200092	0.160055	0.0613682	0.0816935	0	0.0245009	0.079611	0.0743148	0.12049	0.193992	0	0.0766807	0.0816098	0.0885702	0.0431349	0.13548
232	0.196487	0.0952532	0.186548	0.401503	0.114472	0.134816	0.0563029	0.137582	0	0.0427158	0.0719858	0	0.0752909	0.242501	0	0.0495612	0.0521739	0.0307492	0.0445122	0.09006
233	0.13741	0.269606	0.203283	0.396646	0.162306	0.0769231	0.116917	0.197835	0	0.0321716	0.0931963	0.0390928	0.0348432	0.179641	0	0.112091	0	0.0736142	0.135723	0.0414966
234	0.0507092	0.257916	0.197858	0.387656	0.0614871	0.0466926	0.0497925	0.0960048	0	0.0614426	0.137129	0.0387571	0.209254	0.100595	0	0.102857	0	0.068018	0.193036	0.128062
235	0.117254	0.272546	0.204356	0.260101	0.0623819	0.046	0.194501	0.145122	0	0.0587189	0.078991	0.0183762	0.176354	0.0907288	0.0397422	0.104013	0.107538	0.0340543	0.129816	0.119031
236	0.120184	0.322485	0.193974	0.214164	0.12047	0.0211172	0.0513514	0.0929526	0	0.0566202	0.0857049	0.0247244	0.0427236	0.182184	0	0.0541401	0	0.0705009	0.138406	0.0403168
237	0.064632	0.145083	0.182458	0.274221	0	0.0972685	0.0697674	0.164894	0	0	0.0860884	0.0826287	0.0757162	0.223281	0	0.027027	0.229167	0.0908285	0.104567	0.0505415
238	0.115653	0.268849	0.225964	0.188504	0.0673401	0.144269	0.0476689	0.118925	0	0.0589219	0.0708635	0.0315709	0.0668896	0.146654	0.0450387	0	0.0670478	0.0419269	0.19732	0.0474479
239	0.101813	0.136932	0.224051	0.0533104	0	0.0477839	0	0.0215664	0	0.0408341	0.0831378	0.0610599	0.0645161	0.23073	0.0270963	0	0	0	0.135118	0
