# Supplementary material for: Cells use molecular working memory to navigate in changing chemoattractant fields
Source: eLife. 2022 Jun 6;11:e76825. doi: 10.7554/eLife.76825 (PMC9282860; doi:10.7554/eLife.76825)
Supplement: Figure 2—figure supplement 2—source data 1. [file elife-76825-fig2-figsupp2-data1.xlsx]

## Sheet: Supplement 2A
	Bin 0	Bin 1	Bin 2	Bin 3	Bin 4	Bin 5	Bin 6	Bin 7	Bin 8	Bin 9	Bin 10	Bin 11	Bin 12	Bin 13	Bin 14	Bin 15	Bin 16	Bin 17	Bin 18	Bin 19
0	0.395295	0.319947	0.30496	0.405754	0.388965	0.436787	0.592046	0.585081	0.681678	0.68194	0.751758	0.466143	0.466165	0.423765	0.344664	0.442344	0.521966	0.460954	0.547986	0.403936
1	0.316599	0.334411	0.316898	0.400956	0.494516	0.681855	0.520511	0.714505	0.661891	0.718458	0.729757	0.481711	0.491383	0.488083	0.469252	0.390786	0.445127	0.414583	0.471006	0.326575
2	0.305254	0.308307	0.307843	0.410669	0.386671	0.56483	0.574199	0.729616	0.57724	0.599314	0.711861	0.43637	0.415118	0.517826	0.400885	0.534659	0.453733	0.352292	0.289008	0.226741
3	0.366845	0.303149	0.283926	0.400641	0.405844	0.508089	0.539316	0.655397	0.667908	0.607811	0.687933	0.49842	0.478767	0.344705	0.48359	0.412638	0.483782	0.331198	0.325323	0.225299
4	0.371248	0.333912	0.282583	0.403497	0.404111	0.502035	0.543703	0.530963	0.731118	0.564749	0.731005	0.532733	0.597028	0.330378	0.477109	0.46713	0.453755	0.292838	0.295587	0.206888
5	0.34225	0.318978	0.296982	0.422886	0.38923	0.432283	0.49623	0.597743	0.678066	0.674625	0.757412	0.583684	0.476227	0.31976	0.533375	0.443107	0.50383	0.289954	0.237734	0.274224
6	0.339799	0.284646	0.324632	0.422581	0.420754	0.419201	0.578124	0.577994	0.695727	0.606302	0.771696	0.482462	0.495971	0.364092	0.476168	0.492489	0.511667	0.418509	0.322053	0.278179
7	0.361423	0.352372	0.2673	0.406442	0.37714	0.47331	0.553985	0.579077	0.676161	0.621827	0.70065	0.574636	0.437604	0.434752	0.595893	0.537777	0.509163	0.416669	0.442922	0.518922
8	0.375939	0.350598	0.328397	0.475488	0.570355	0.390217	0.671286	0.566738	0.49402	0.643672	0.753025	0.523602	0.528879	0.655759	0.674369	0.532805	0.60365	0.494821	0.52207	0.529197
9	0.448005	0.342701	0.364844	0.499084	0.578087	0.65855	0.696621	0.62087	0.574337	0.669269	0.732236	0.499761	0.710257	0.819502	0.794825	0.680212	0.574841	0.534406	0.577317	0.584308
10	0.460131	0.405547	0.440579	0.496011	0.67516	0.705106	0.694071	0.623361	0.611579	0.770607	0.664725	0.587584	0.763493	0.799908	0.631881	0.731967	0.718445	0.506396	0.534304	0.614724
11	0.513653	0.389506	0.462763	0.504861	0.671421	0.763055	0.698718	0.694981	0.714279	0.749413	0.823191	0.880035	0.863938	0.85558	0.806138	0.773987	0.667568	0.603575	0.546099	0.709427
12	0.573696	0.383748	0.464722	0.605309	0.760493	0.838379	0.710313	0.682301	0.667935	0.686468	0.815961	0.767984	0.923552	0.967567	0.847885	0.803568	0.796832	0.699806	0.581142	0.60775
13	0.680585	0.462601	0.478704	0.590376	0.736394	0.659628	0.727557	0.736329	0.749885	0.805111	0.759496	0.796954	0.824554	0.836604	0.642205	0.828476	0.951644	0.758552	0.523866	0.669666
14	0.713051	0.457231	0.502662	0.622125	0.7271	0.753605	0.748748	0.795893	0.872946	0.893705	0.748993	0.944909	0.83994	0.796473	0.79255	0.897817	1.08163	0.621547	0.582134	0.669096
15	0.675167	0.411608	0.455834	0.60356	0.73922	0.795364	0.817092	0.763565	0.747926	0.800539	0.813969	0.895348	0.881245	0.667205	0.733728	0.897652	0.828055	0.752002	0.747361	0.640903
16	0.667059	0.47927	0.482055	0.543716	0.779844	0.837396	0.820459	0.690611	0.756646	0.896142	0.906348	0.896051	1.03665	0.728487	0.779649	0.876574	1.00339	0.893473	0.843713	0.670994
17	0.689702	0.494954	0.461463	0.548426	0.721561	0.885623	0.741474	0.829278	0.80874	0.850456	0.941535	1.03379	0.854048	0.721769	0.821353	0.969866	1.00972	0.98251	0.720491	0.691526
18	0.687006	0.525219	0.408333	0.579845	0.754184	0.928088	0.842193	0.876021	0.810091	0.923313	0.946446	0.997922	0.888026	0.74981	0.937324	0.904524	1.00708	0.956237	0.89602	0.668453
19	0.697769	0.461223	0.438723	0.565652	0.765011	0.878876	0.880187	0.819094	0.841709	0.985432	0.940436	0.980097	0.974637	0.815118	0.979983	1.14427	0.968112	0.932772	0.77068	0.687571
20	0.67395	0.503784	0.505846	0.569133	0.810951	0.85479	0.801789	0.990053	0.811149	0.936968	0.958873	0.983733	0.847867	0.828758	0.892317	1.15284	1.02691	1.01944	0.671926	0.660269
21	0.722456	0.509982	0.393031	0.548169	0.833674	0.868753	0.828755	0.947892	0.784609	0.790342	0.952649	0.986846	0.903041	0.86843	0.952904	1.01664	0.897356	0.959864	0.901188	0.647045
22	0.695091	0.527404	0.465611	0.521173	0.767556	0.867125	0.826852	0.855122	0.751036	0.966739	1.15535	0.977304	0.978027	0.853308	0.895237	1.04526	0.88947	0.977632	0.91008	0.611336
23	0.689493	0.515292	0.490121	0.561534	0.722778	0.789148	0.783654	0.709013	0.754979	0.861593	1.07177	0.967343	0.867583	0.73568	0.99735	0.960932	1.08856	0.980107	0.841002	0.710217
24	0.660876	0.521695	0.531792	0.527687	0.7546	0.817453	0.665606	0.758505	0.721184	0.947256	1.03074	0.832538	0.977509	0.734253	0.98433	1.03094	0.918332	0.95547	0.732642	0.661912
25	0.641404	0.473808	0.501401	0.559261	0.727173	0.826459	0.757635	0.796151	0.821077	1.02445	1.04393	0.922371	0.902129	0.793876	0.872032	0.855053	0.845143	1.04514	0.8872	0.698031
26	0.711812	0.421029	0.461491	0.604346	0.667319	0.832279	0.768765	0.73371	0.768791	0.842005	0.884589	0.91856	0.823009	0.796904	0.75264	0.991745	0.943129	1.07152	0.784532	0.66712
27	0.681727	0.495858	0.529606	0.553524	0.808881	0.802631	0.919062	0.783016	0.772285	0.839757	0.944965	1.01618	0.984426	0.725878	0.78674	0.884349	1.01895	0.9789	0.712926	0.660499
28	0.702381	0.543753	0.432563	0.598988	0.811743	0.850297	0.784487	0.749299	0.772568	0.786915	0.934739	0.91913	0.923166	0.744005	0.673772	0.830808	1.01087	1.01596	0.7626	0.738199
29	0.625576	0.492657	0.49331	0.556585	0.767544	0.889374	0.832344	0.830345	0.820521	0.921425	0.821013	1.0872	0.991066	0.712815	0.699265	0.775149	0.92481	0.998798	0.756937	0.742698
30	0.688583	0.466491	0.46464	0.545577	0.73377	0.866326	0.815416	0.756024	0.790487	0.851508	0.959905	1.02345	0.909772	0.583342	0.627859	0.703421	0.940364	1.05778	0.729825	0.686577
31	0.629722	0.501293	0.406996	0.55372	0.618183	0.846127	0.724489	0.816409	0.798287	0.816346	0.944043	0.971134	0.830469	0.699704	0.657864	0.527175	0.915332	0.87147	0.757435	0.759558
32	0.676543	0.486218	0.495682	0.550834	0.742883	0.889453	0.707006	0.79037	0.809253	0.901488	0.939625	0.973524	0.854917	0.61384	0.689628	0.652285	1.08064	0.931209	0.749908	0.718498
33	0.649539	0.448043	0.419238	0.587007	0.782919	0.931707	0.75185	0.789976	0.787186	0.893593	0.911486	0.970094	0.957735	0.709059	0.702588	0.593626	0.83623	0.86576	0.688542	0.755735
34	0.701374	0.533831	0.429696	0.567653	0.730228	0.917342	0.808669	0.722951	0.82755	0.853214	1.04104	0.973123	0.9572	0.684312	0.659305	0.657379	0.976449	0.862961	0.87648	0.758334
35	0.706362	0.54785	0.521525	0.588895	0.611598	0.841921	0.827604	0.799827	0.872793	0.932871	1.01723	0.97193	0.920518	0.636393	0.567027	0.84589	0.865895	0.94881	0.771871	0.800837
36	0.783218	0.504946	0.493061	0.571237	0.63404	0.844626	0.769811	0.814969	0.784867	0.892717	0.975698	1.13582	0.935088	0.713248	0.677645	0.917417	0.971468	1.2207	0.809032	0.797267
37	0.787114	0.551614	0.449262	0.609422	0.618128	0.812718	0.910344	0.828858	0.810372	0.827286	1.00773	1.05256	0.98792	0.730425	0.744825	0.744706	0.918362	0.936435	0.905587	0.789053
38	0.801584	0.581449	0.462922	0.653212	0.728995	0.84112	0.877064	0.834409	0.826856	1.02081	1.05518	1.05518	0.985458	0.814151	0.731193	0.758774	0.953261	0.983796	0.91133	0.815198
39	0.792332	0.61414	0.407228	0.666174	0.687035	0.908475	0.891583	0.827067	0.874479	0.902407	1.10103	0.988896	0.813409	0.724683	0.752519	0.756343	0.832734	0.980439	0.833524	0.7704
40	0.776988	0.688639	0.457671	0.578762	0.684517	0.830646	0.937929	0.744724	0.874087	0.975418	0.975071	0.890689	0.936641	0.762744	0.774197	0.821681	1.01764	0.917893	0.856657	0.730973
41	0.785614	0.611976	0.453135	0.652644	0.69793	0.891058	0.943688	0.833733	0.80726	0.983194	0.9253	1.07429	0.895438	0.800874	0.657586	0.929564	0.939593	0.932031	0.954676	0.777887
42	0.758287	0.525242	0.482883	0.578504	0.717497	1.00068	0.858094	0.813302	0.833523	0.935135	0.905131	1.0237	0.80328	0.650361	0.710095	0.859398	0.960339	1.09995	0.87542	0.780175
43	0.80117	0.540188	0.476046	0.654908	0.725123	0.940235	0.872079	0.874906	0.921909	0.93188	1.11342	0.915291	0.923195	0.607032	0.658446	0.924181	1.01196	0.995315	0.936009	0.787601
44	0.822564	0.659554	0.456206	0.589295	0.744306	0.904465	0.912723	0.852218	0.897766	1.00619	1.00867	0.955579	0.9383	0.648253	0.680949	0.860566	0.990411	0.894596	1.00052	0.800265
45	0.768732	0.602887	0.395612	0.609751	0.690227	0.976654	0.939105	0.873919	0.946456	0.912542	0.971804	1.00534	0.966836	0.708609	0.638179	0.872712	1.06457	0.907655	0.922495	0.735395
46	0.718682	0.528111	0.44428	0.648801	0.699181	0.890821	0.812251	0.812943	0.961467	0.938281	0.941262	1.04091	0.850473	0.670395	0.73923	0.836035	0.99981	0.945509	0.780626	0.760751
47	0.731111	0.664129	0.451157	0.651587	0.771131	0.909379	0.883195	0.739479	0.931986	0.975478	0.978821	1.0543	0.895463	0.733211	0.818591	0.957341	0.911422	0.974421	0.943236	0.753439
48	0.746613	0.539452	0.464456	0.601607	0.677136	0.864632	0.896795	0.845417	0.923879	1.02249	0.98529	1.03713	0.889479	0.660798	0.902232	0.928705	0.905328	1.06832	0.851343	0.752186
49	0.731275	0.638631	0.422951	0.558506	0.778293	0.931887	0.864186	0.824862	0.897069	1.03948	0.97561	1.01241	0.832564	0.73717	1.03314	0.953788	0.983944	0.96991	0.883667	0.765514
50	0.817619	0.644656	0.433501	0.585631	0.731131	0.985474	0.898339	0.821242	0.85633	0.947836	1.03064	0.944148	0.856176	0.786202	0.791403	0.873201	0.870108	0.981245	0.922945	0.897214
51	0.770458	0.663353	0.436957	0.613928	0.736074	0.913198	0.833646	0.775104	0.863276	0.943846	1.08264	0.90668	0.833992	0.77057	0.830034	0.89457	0.87111	1.03085	0.849662	0.86114
52	0.825308	0.700236	0.395149	0.553554	0.695011	0.977818	0.835358	0.797053	0.797017	0.908511	0.972106	0.907024	0.897367	0.858969	0.659023	0.874509	0.902704	0.882052	0.924112	0.780618
53	0.792835	0.71252	0.412189	0.575178	0.803107	0.921694	0.846418	0.824553	0.852962	0.991032	1.00424	0.993002	0.860455	0.836512	0.880817	0.876131	0.946794	0.792103	0.88957	0.863736
54	0.857419	0.717166	0.4971	0.455865	0.683031	0.819229	0.909548	0.84935	0.815074	0.875292	0.943272	0.985073	0.857521	0.859176	0.852867	0.82496	0.930653	0.862596	0.764185	0.833849
55	0.769178	0.615482	0.386052	0.455184	0.779956	0.905561	0.939308	0.883549	0.79391	0.932689	0.840801	0.94749	0.8637	0.749305	0.722621	0.833722	0.898637	0.830653	0.748863	0.812209
56	0.818467	0.687843	0.465955	0.493266	0.761271	0.891363	0.938274	0.85821	0.831029	0.87146	0.920762	1.04442	0.854077	0.823745	0.74098	0.861855	0.897269	1.04424	0.812113	0.978545
57	0.784873	0.674868	0.503732	0.550579	0.764325	0.848999	0.830891	0.777167	0.781441	0.97306	0.970627	0.884201	0.82054	0.749664	0.763723	0.72492	0.880122	0.827163	0.809058	0.789347
58	0.794728	0.729928	0.464382	0.487269	0.858653	0.800565	0.818233	0.735939	0.750515	1.00763	0.889738	1.02344	0.828058	0.775267	0.856163	0.760936	0.882904	0.976901	0.770536	0.813764
59	0.769921	0.753737	0.516126	0.527528	0.714997	0.790869	0.925787	0.759726	0.738982	0.821228	0.913474	0.954383	0.855535	0.753036	0.795701	0.655699	0.889163	0.912613	0.761955	0.868693
60	0.807426	0.748331	0.532938	0.511623	0.808632	0.914397	0.832509	0.826016	0.778349	0.901457	0.980848	0.887186	0.824002	0.843391	0.740912	0.734759	0.965999	0.973683	0.848836	0.806012
61	0.780671	0.74975	0.525954	0.531362	0.775537	0.863067	0.788631	0.861349	0.872327	0.929514	1.00608	1.02995	0.840518	0.844707	0.812144	0.73452	0.9489	1.00209	0.744452	0.81543
62	0.791193	0.800254	0.600394	0.475766	0.743575	1.01364	0.873299	0.833106	0.907596	0.975297	0.915707	0.831448	0.89105	0.852166	0.909444	0.757767	0.891453	1.10871	0.855021	0.740679
63	0.851289	0.728586	0.538093	0.51218	0.789643	0.853814	0.900712	0.815119	0.907817	0.871501	0.942307	0.95328	0.873731	0.854466	0.890317	0.78497	0.761019	0.926751	0.904531	0.859913
64	0.879636	0.702296	0.55329	0.573996	0.659546	0.839045	0.956575	0.774038	0.856882	0.910425	0.984406	0.844122	0.875013	0.86436	0.894064	0.84424	0.688945	0.902983	0.883998	0.807281
65	0.869262	0.837367	0.570162	0.534095	0.670589	0.772804	0.843515	0.687746	0.811997	0.954357	0.975729	0.918514	0.821225	0.833443	0.678604	0.888474	0.815924	0.983767	0.924831	0.796885
66	0.788301	0.761685	0.630527	0.492874	0.675098	0.787749	0.832634	0.740109	0.74242	0.895679	0.972311	0.899756	0.869501	0.809386	0.731242	0.791916	0.88947	0.799884	0.829546	0.849592
67	0.815627	0.762043	0.54096	0.531078	0.736517	0.806861	0.829804	0.754854	0.732633	0.797457	0.891244	0.896418	0.839824	0.810776	0.776737	0.811415	0.804863	1.03781	0.780796	0.724564
68	0.718653	0.71364	0.481076	0.487061	0.620139	0.714393	0.802153	0.691156	0.718392	0.725121	0.840226	0.862739	0.783643	0.750926	0.755769	0.766013	0.675696	0.729102	0.586203	0.635784
69	0.715875	0.70285	0.512759	0.504582	0.564249	0.672451	0.798567	0.708645	0.675106	0.736639	0.877418	0.880274	0.784259	0.678889	0.64176	0.773401	0.661386	0.985821	0.711922	0.558628
70	0.611592	0.656591	0.517856	0.425603	0.548368	0.622547	0.81766	0.706965	0.711825	0.75015	0.887646	0.832059	0.847719	0.711873	0.704128	0.687908	0.695353	0.891734	0.770825	0.6483
71	0.600553	0.715948	0.469457	0.418777	0.591709	0.606471	0.777333	0.730988	0.697639	0.719893	0.884928	0.908792	0.857321	0.72149	0.693307	0.725154	0.67207	0.730917	0.912493	0.618919
72	0.637312	0.551106	0.495877	0.431647	0.520512	0.649342	0.790311	0.664088	0.658055	0.721599	0.741316	0.782414	0.814702	0.614044	0.668678	0.659085	0.572633	0.825134	0.879623	0.563059
73	0.606656	0.584301	0.515716	0.426857	0.494038	0.595784	0.72648	0.730691	0.707434	0.643287	0.816842	0.837377	0.785726	0.659743	0.667297	0.683604	0.68337	0.72544	0.733576	0.616554
74	0.630042	0.548106	0.476258	0.440447	0.500523	0.548654	0.731159	0.709595	0.670834	0.673299	0.698257	0.79765	0.779189	0.690735	0.671273	0.672709	0.653004	0.749501	0.834619	0.571749
75	0.546943	0.494844	0.516255	0.382943	0.492757	0.616228	0.710989	0.648807	0.640083	0.743333	0.707837	0.78531	0.760331	0.685011	0.666795	0.725141	0.511999	0.734619	0.770967	0.604921
76	0.567834	0.562283	0.476243	0.396596	0.458817	0.612067	0.727706	0.639139	0.691831	0.681917	0.756503	0.939428	0.756109	0.622603	0.675624	0.683771	0.576775	0.830798	0.911413	0.634548
77	0.629918	0.561366	0.481764	0.384727	0.5105	0.610205	0.751648	0.589538	0.688092	0.64352	0.593609	0.817342	0.770836	0.546576	0.605659	0.626863	0.445751	0.772361	0.630296	0.62662
78	0.513178	0.623511	0.537723	0.410022	0.461014	0.602043	0.749456	0.640762	0.650132	0.724231	0.699823	0.72491	0.695731	0.590746	0.613914	0.613163	0.535538	0.804238	0.853289	0.681223
79	0.585534	0.522954	0.55537	0.388308	0.508358	0.549556	0.71593	0.730472	0.607129	0.677493	0.702495	0.93418	0.717552	0.636761	0.584819	0.585058	0.720849	0.611593	0.730989	0.722553
80	0.579915	0.548125	0.511758	0.353721	0.453731	0.588773	0.707334	0.697939	0.650884	0.716853	0.664406	0.815889	0.710282	0.624172	0.725172	0.511651	0.605281	0.764107	0.614667	0.610781
81	0.510216	0.533	0.496476	0.370178	0.487308	0.521479	0.712851	0.709839	0.623646	0.69892	0.721889	0.663011	0.753146	0.725583	0.61736	0.601544	0.64483	0.621375	0.705079	0.663406
82	0.544022	0.600756	0.554966	0.437696	0.422715	0.577811	0.793209	0.682909	0.695198	0.727985	0.666111	0.753857	0.711517	0.546704	0.59983	0.573676	0.685441	0.549215	0.647018	0.582546
83	0.527062	0.577332	0.479965	0.429995	0.482493	0.593154	0.739379	0.805814	0.676714	0.702936	0.679638	0.700135	0.68471	0.596526	0.650648	0.569439	0.605298	0.69048	0.813897	0.670031
84	0.501694	0.588945	0.502338	0.346965	0.414542	0.522897	0.722851	0.744047	0.726225	0.62872	0.685146	0.666137	0.677214	0.559257	0.529009	0.543705	0.789286	0.688331	0.731024	0.600725
85	0.489273	0.625822	0.502902	0.438208	0.397878	0.541201	0.670484	0.697525	0.747392	0.695449	0.625227	0.798381	0.681953	0.529847	0.589209	0.534628	0.723189	0.662434	0.735963	0.636329
86	0.468197	0.584751	0.457831	0.345733	0.461468	0.581666	0.666336	0.756338	0.630557	0.600953	0.686326	0.594477	0.588446	0.60907	0.607321	0.553488	0.56815	0.671145	0.711106	0.592326
87	0.503077	0.521024	0.39786	0.377122	0.508038	0.760389	0.793298	0.74305	0.684379	0.617753	0.600428	0.674583	0.62823	0.62194	0.590279	0.556962	0.695733	0.61797	0.53453	0.608776
88	0.542498	0.532831	0.456572	0.377968	0.453782	0.652695	0.718945	0.692884	0.713174	0.702524	0.603691	0.629063	0.676961	0.531868	0.565884	0.646506	0.512756	0.772826	0.777607	0.632813
89	0.492594	0.577894	0.458403	0.353462	0.465603	0.555691	0.796694	0.70448	0.719424	0.625797	0.641468	0.637113	0.612274	0.583057	0.623683	0.557115	0.476362	0.633155	0.705962	0.585307
90	0.532109	0.651459	0.386244	0.439034	0.395202	0.6666	0.722911	0.687489	0.603289	0.589143	0.544597	0.592333	0.588349	0.616255	0.568862	0.579642	0.650381	0.701	0.624641	0.504302
91	0.557425	0.551076	0.429569	0.381584	0.450748	0.642117	0.748577	0.715372	0.611972	0.606229	0.683864	0.752447	0.605856	0.582584	0.558398	0.504726	0.67882	0.743926	0.698058	0.489394
92	0.565307	0.50411	0.369242	0.355582	0.534725	0.74865	0.72829	0.66149	0.678776	0.610559	0.652595	0.601594	0.601574	0.563255	0.635959	0.510425	0.598509	0.542674	0.577765	0.506187
93	0.518232	0.559281	0.388564	0.369794	0.493563	0.727672	0.587782	0.681853	0.658049	0.603554	0.62354	0.565761	0.537186	0.574049	0.65704	0.512492	0.524043	0.502514	0.573048	0.522153
94	0.533422	0.533531	0.406835	0.447961	0.457877	0.637935	0.796818	0.69769	0.659898	0.672583	0.63461	0.625376	0.667767	0.605496	0.609501	0.447042	0.621652	0.473979	0.594849	0.518148
95	0.54047	0.574493	0.372222	0.343778	0.43423	0.599226	0.764319	0.688657	0.671721	0.650048	0.612056	0.638302	0.55199	0.645931	0.638375	0.564948	0.685057	0.714055	0.727894	0.491853
96	0.48871	0.509685	0.370177	0.347911	0.397688	0.57363	0.743419	0.672688	0.71913	0.629591	0.657214	0.620088	0.52765	0.60009	0.722367	0.562511	0.469959	0.638081	0.629242	0.49211
97	0.493425	0.545889	0.324664	0.333737	0.417572	0.602612	0.702155	0.641301	0.691002	0.560977	0.551407	0.51979	0.516436	0.644284	0.626478	0.616024	0.449124	0.682507	0.602041	0.486838
98	0.599265	0.562335	0.365286	0.441268	0.432961	0.492533	0.678429	0.736948	0.674006	0.591506	0.676193	0.668761	0.581805	0.552831	0.613465	0.528831	0.38332	0.497494	0.585898	0.503176
99	0.571958	0.551779	0.282542	0.386357	0.391971	0.584045	0.805854	0.71869	0.707428	0.548493	0.56826	0.710698	0.608656	0.603983	0.534353	0.592551	0.518901	0.548677	0.47792	0.45344
100	0.607125	0.613933	0.371528	0.357045	0.435593	0.479624	0.677694	0.751332	0.691543	0.603466	0.580933	0.660417	0.559036	0.595731	0.704022	0.731019	0.529903	0.450089	0.732522	0.46205
101	0.527683	0.585925	0.384361	0.356103	0.378921	0.571736	0.685581	0.773151	0.645208	0.551791	0.639247	0.646433	0.543179	0.579902	0.710195	0.734947	0.602435	0.448999	0.495496	0.43101
102	0.522367	0.524962	0.320418	0.352921	0.485378	0.6784	0.736606	0.67243	0.630482	0.580107	0.455347	0.685799	0.577868	0.562463	0.618749	0.536894	0.53659	0.568022	0.507041	0.443676
103	0.49104	0.52086	0.347282	0.370564	0.424971	0.611389	0.776895	0.672177	0.64888	0.505068	0.682998	0.631227	0.581256	0.536613	0.568554	0.592832	0.406038	0.48371	0.475171	0.447385
104	0.497944	0.610295	0.370489	0.314429	0.374346	0.504934	0.668411	0.654604	0.624726	0.590779	0.53635	0.455626	0.500122	0.555617	0.486244	0.579904	0.528878	0.378075	0.523999	0.449094
105	0.540128	0.395355	0.34882	0.420229	0.552832	0.790525	0.573765	0.607403	0.568113	0.5279	0.599317	0.553708	0.546982	0.590837	0.673362	0.650039	0.442253	0.523287	0.51879	0.53279
106	0.470067	0.44442	0.291291	0.402139	0.336929	0.456167	0.697257	0.602636	0.63236	0.576869	0.579401	0.597716	0.500254	0.579311	0.764515	0.694101	0.427762	0.527266	0.437929	0.48736
107	0.528449	0.523083	0.398408	0.322465	0.396614	0.405831	0.753526	0.603894	0.581334	0.525608	0.575604	0.67496	0.487826	0.575471	0.664675	0.579078	0.663774	0.422109	0.594482	0.470672
108	0.567142	0.543115	0.344849	0.380564	0.479178	0.718107	0.570044	0.705033	0.577832	0.533542	0.526881	0.641849	0.509006	0.549915	0.664536	0.440057	0.435878	0.314871	0.523415	0.49954
109	0.598934	0.485791	0.364025	0.38617	0.393576	0.641215	0.759228	0.617868	0.606575	0.599528	0.658581	0.579478	0.518751	0.530649	0.573013	0.655376	0.475115	0.482028	0.557215	0.423645
110	0.565831	0.533169	0.381818	0.305241	0.380679	0.59555	0.775781	0.589511	0.560946	0.573811	0.533371	0.602013	0.496791	0.527875	0.634958	0.644864	0.463548	0.501055	0.510795	0.533237
111	0.601423	0.525196	0.433041	0.427367	0.380743	0.563262	0.788331	0.531518	0.565446	0.587272	0.581988	0.538427	0.501056	0.525781	0.686521	0.611217	0.511109	0.51234	0.528862	0.463562
112	0.56999	0.479614	0.341197	0.375431	0.573453	0.743349	0.594266	0.672172	0.531932	0.54162	0.508759	0.558657	0.553663	0.536536	0.533857	0.648003	0.523078	0.465443	0.437598	0.44231
113	0.640882	0.5631	0.458198	0.347098	0.443944	0.788011	0.636348	0.587966	0.557526	0.461678	0.525163	0.543612	0.598976	0.52616	0.601448	0.514199	0.41674	0.48954	0.528126	0.405247
114	0.502942	0.585093	0.601167	0.582121	0.532837	0.740744	0.75018	0.621376	0.601078	0.487444	0.471041	0.555709	0.539581	0.572328	0.588494	0.497756	0.546417	0.580563	0.484939	0.541852
115	0.570428	0.54851	0.438279	0.324416	0.447037	0.548641	0.733999	0.584753	0.500752	0.553386	0.62573	0.506901	0.467589	0.551812	0.622853	0.572853	0.55024	0.585471	0.435667	0.610693
116	0.619268	0.624082	0.557393	0.320229	0.424193	0.613691	0.689815	0.678988	0.462831	0.469042	0.567343	0.653458	0.507758	0.611911	0.699896	0.597567	0.45852	0.512854	0.569403	0.516633
117	0.606731	0.506218	0.442907	0.246564	0.345444	0.503795	0.689243	0.518836	0.592178	0.414196	0.459105	0.620013	0.554928	0.578009	0.708605	0.599278	0.549186	0.496146	0.474167	0.505462
118	0.516705	0.553913	0.57507	0.515218	0.478274	0.65057	0.622645	0.693623	0.556297	0.502979	0.48346	0.611495	0.521001	0.565695	0.738823	0.651112	0.569877	0.46515	0.542007	0.478656
119	0.533491	0.615162	0.548116	0.546783	0.593455	0.772508	0.647077	0.546666	0.556036	0.577857	0.53178	0.564569	0.544058	0.552155	0.653761	0.624678	0.598102	0.489186	0.57349	0.50987
120	0.468932	0.628189	0.538466	0.504378	0.555442	0.726897	0.583957	0.569964	0.53176	0.497422	0.602824	0.622759	0.553008	0.590208	0.632736	0.587587	0.561187	0.363928	0.669055	0.496541
121	0.52277	0.57026	0.584989	0.525818	0.494826	0.672117	0.707293	0.59829	0.523529	0.487011	0.505425	0.589056	0.535261	0.543516	0.614123	0.698965	0.523498	0.503067	0.591377	0.52218
122	0.585477	0.649137	0.443311	0.582759	0.773349	0.718733	0.638855	0.603443	0.493508	0.441425	0.559089	0.62782	0.482643	0.520395	0.62578	0.650232	0.542217	0.457619	0.797815	0.662971
123	0.499153	0.582363	0.536827	0.586935	0.547733	0.692286	0.76095	0.603214	0.494343	0.461116	0.540343	0.624314	0.549415	0.615419	0.739493	0.613694	0.619604	0.495673	0.576423	0.51398
124	0.461391	0.617916	0.589045	0.581718	0.527654	0.651882	0.740165	0.601387	0.492595	0.490163	0.495059	0.522082	0.58475	0.594604	0.698101	0.685211	0.515926	0.533413	0.497213	0.453604
125	0.48966	0.581362	0.496435	0.443851	0.511557	0.771406	0.619223	0.580753	0.560676	0.478857	0.547453	0.601249	0.54928	0.547893	0.718885	0.716638	0.604116	0.451311	0.716815	0.571577
126	0.4424	0.505864	0.579613	0.51194	0.522618	0.71169	0.701631	0.601711	0.607991	0.50529	0.461635	0.525741	0.558844	0.532034	0.558917	0.606645	0.61973	0.500955	0.579892	0.543641
127	0.591454	0.537767	0.606348	0.533432	0.644267	0.76116	0.665502	0.715214	0.632098	0.492755	0.488153	0.566032	0.491443	0.531323	0.494016	0.625806	0.722703	0.565483	0.600441	0.51134
128	0.575286	0.557792	0.533791	0.738817	0.771956	0.604557	0.724594	0.593932	0.501462	0.468401	0.479082	0.679967	0.407502	0.541257	0.522005	0.616155	0.480426	0.566673	0.466054	0.476107
129	0.546898	0.600213	0.535042	0.488089	0.502205	0.692067	0.718063	0.646498	0.591454	0.491922	0.520028	0.501757	0.481401	0.510722	0.474289	0.632609	0.651363	0.497329	0.601497	0.56252
130	0.556139	0.575523	0.518289	0.513035	0.391657	0.698082	0.728923	0.54108	0.557071	0.445199	0.507561	0.545475	0.557099	0.55369	0.471687	0.712364	0.532822	0.482709	0.318135	0.447353
131	0.480908	0.488785	0.506205	0.477654	0.585361	0.63816	0.772868	0.596247	0.576376	0.488346	0.517937	0.504523	0.544518	0.60864	0.494449	0.669065	0.634297	0.506842	0.339494	0.423204
132	0.518813	0.557213	0.477627	0.438098	0.406019	0.635792	0.704044	0.544704	0.525637	0.481511	0.508131	0.551244	0.518573	0.672415	0.575946	0.495661	0.567542	0.577323	0.658069	0.452391
133	0.561996	0.528639	0.538611	0.474167	0.470856	0.670036	0.690511	0.597955	0.483183	0.492781	0.511455	0.585983	0.486572	0.623737	0.584663	0.532618	0.751404	0.572703	0.559381	0.478935
134	0.507163	0.571459	0.583109	0.585801	0.550544	0.616518	0.648021	0.641034	0.544277	0.46811	0.495306	0.596975	0.475068	0.582615	0.546095	0.471472	0.612058	0.483794	0.570569	0.544753
135	0.557503	0.50023	0.553473	0.460615	0.531477	0.653681	0.692157	0.677079	0.504421	0.529711	0.540268	0.537175	0.495313	0.657841	0.549555	0.45881	0.581278	0.714008	0.71476	0.413146
136	0.474536	0.539885	0.612767	0.435977	0.43718	0.67135	0.589898	0.630116	0.550517	0.492225	0.644534	0.640876	0.506115	0.612373	0.688743	0.455973	0.584992	0.55527	0.559111	0.379286
137	0.526213	0.577735	0.552727	0.507915	0.569227	0.738763	0.670262	0.561275	0.508038	0.518623	0.568423	0.576904	0.521691	0.706813	0.62431	0.437545	0.587754	0.65093	0.564633	0.576753
138	0.544816	0.49327	0.457562	0.520995	0.60131	0.568041	0.71711	0.566333	0.548271	0.540334	0.578241	0.532717	0.55505	0.663134	0.615662	0.55693	0.574268	0.483624	0.500724	0.517887
139	0.386382	0.446834	0.458096	0.527079	0.585371	0.65028	0.716481	0.620791	0.646246	0.484151	0.451954	0.579839	0.564414	0.594687	0.77597	0.441938	0.551223	0.473119	0.509408	0.379819
140	0.469441	0.495721	0.528045	0.480381	0.501562	0.724693	0.631333	0.648128	0.612109	0.553733	0.532315	0.556422	0.512951	0.692215	0.64739	0.583714	0.394612	0.521669	0.515231	0.335745
141	0.507305	0.539071	0.520886	0.42222	0.408831	0.673935	0.660101	0.641232	0.586427	0.504037	0.563689	0.551249	0.553761	0.700558	0.604111	0.507337	0.342521	0.539773	0.444241	0.457254
142	0.446095	0.586086	0.563703	0.50901	0.545499	0.715231	0.6767	0.681991	0.56676	0.624205	0.608322	0.620643	0.543985	0.590759	0.718188	0.399614	0.662023	0.530884	0.64666	0.591643
143	0.507137	0.549232	0.551427	0.496711	0.583755	0.730916	0.594274	0.658925	0.607612	0.55456	0.532589	0.617603	0.508201	0.624387	0.608296	0.424721	0.608865	0.61081	0.400267	0.450879
144	0.535422	0.550196	0.586758	0.626907	0.587829	0.655764	0.67232	0.61936	0.61861	0.54521	0.588535	0.568797	0.498181	0.655296	0.636454	0.400898	0.541065	0.598254	0.681917	0.570492
145	0.37808	0.550166	0.505578	0.514068	0.429541	0.716794	0.728505	0.637308	0.642211	0.58646	0.528421	0.528808	0.537488	0.607586	0.599181	0.557201	0.411367	0.640515	0.52479	0.328718
146	0.460209	0.515924	0.555795	0.435034	0.489276	0.719461	0.656507	0.597858	0.623385	0.54524	0.465074	0.509003	0.493237	0.615636	0.67831	0.456207	0.549195	0.586027	0.656116	0.395628
147	0.480242	0.476193	0.552004	0.468029	0.556928	0.701071	0.685888	0.647829	0.49749	0.549365	0.452971	0.515389	0.613133	0.726248	0.618968	0.431777	0.582391	0.595845	0.478464	0.410682
148	0.47988	0.567581	0.571211	0.371504	0.429353	0.6255	0.715886	0.601112	0.621586	0.528191	0.538174	0.588143	0.537395	0.668139	0.669325	0.470037	0.541503	0.663928	0.530475	0.45691
149	0.437593	0.501236	0.591936	0.492296	0.62087	0.665915	0.605993	0.652494	0.585719	0.53715	0.565391	0.497068	0.55645	0.704464	0.645654	0.647792	0.35695	0.615665	0.611753	0.472146
150	0.373513	0.585025	0.599622	0.508342	0.509345	0.611471	0.70436	0.698764	0.584406	0.543335	0.582183	0.575803	0.57181	0.747154	0.699809	0.675394	0.347876	0.584249	0.552833	0.601101
151	0.476831	0.579225	0.568089	0.510326	0.551893	0.765706	0.668808	0.61918	0.648936	0.524419	0.513208	0.63636	0.54578	0.739329	0.644778	0.443843	0.639151	0.611119	0.555226	0.48064
152	0.504243	0.523933	0.526625	0.344072	0.414025	0.520056	0.717407	0.620524	0.597768	0.520343	0.537056	0.66252	0.49012	0.697442	0.742182	0.700353	0.418956	0.57735	0.598764	0.520898
153	0.546505	0.553025	0.598061	0.573513	0.607615	0.645053	0.643442	0.633989	0.571646	0.56279	0.517631	0.599069	0.513692	0.71139	0.654647	0.630704	0.430886	0.608446	0.581891	0.399706
154	0.483518	0.549653	0.567756	0.602043	0.682999	0.69078	0.639958	0.661949	0.631715	0.535954	0.487048	0.563325	0.547425	0.683578	0.766142	0.580672	0.40065	0.594002	0.606776	0.49906
155	0.462143	0.508424	0.615673	0.553012	0.791429	0.688451	0.663338	0.634036	0.714276	0.496571	0.555077	0.647068	0.508565	0.685084	0.646293	0.524821	0.528386	0.608089	0.717646	0.521761
156	0.502525	0.603019	0.66777	0.475477	0.644972	0.616798	0.793778	0.753392	0.669913	0.478407	0.526359	0.682182	0.532987	0.712087	0.599477	0.632371	0.470171	0.592725	0.442734	0.423697
157	0.489281	0.527546	0.581984	0.495513	0.668313	0.67211	0.728423	0.670296	0.641454	0.521869	0.503963	0.662337	0.572273	0.711915	0.66645	0.522714	0.506865	0.476479	0.636708	0.523094
158	0.492637	0.545338	0.54993	0.441035	0.535678	0.678002	0.649691	0.672292	0.643589	0.547856	0.549932	0.614586	0.568851	0.589579	0.608916	0.554468	0.458236	0.580114	0.594139	0.52435
159	0.48476	0.560316	0.560104	0.479384	0.676922	0.679881	0.690215	0.690018	0.661265	0.549113	0.586741	0.567543	0.511105	0.66169	0.653454	0.620144	0.390302	0.528139	0.597566	0.497571
160	0.525438	0.531221	0.557429	0.468612	0.492876	0.729537	0.654308	0.616463	0.691694	0.563315	0.482859	0.477737	0.496601	0.604724	0.621603	0.442052	0.473866	0.473418	0.39139	0.428191
161	0.511236	0.450894	0.57201	0.532084	0.624192	0.712693	0.584359	0.679503	0.682127	0.517545	0.523239	0.574544	0.528646	0.704315	0.648463	0.536652	0.426697	0.481903	0.464541	0.421127
162	0.499897	0.472498	0.448568	0.546917	0.474472	0.661355	0.704084	0.589719	0.653583	0.489263	0.462604	0.579801	0.577519	0.731218	0.561926	0.44124	0.387529	0.428886	0.450104	0.34787
163	0.432661	0.493196	0.572955	0.570117	0.553699	0.536225	0.61027	0.585003	0.614352	0.583904	0.414547	0.515649	0.519296	0.758278	0.607089	0.518502	0.406101	0.537574	0.555089	0.416845
164	0.50471	0.489002	0.567014	0.476963	0.52153	0.66492	0.57382	0.608404	0.642878	0.566969	0.508381	0.472756	0.54037	0.809842	0.665138	0.548749	0.407975	0.584809	0.549751	0.427408
165	0.498778	0.524587	0.507285	0.468729	0.71239	0.553454	0.558047	0.507836	0.614083	0.570519	0.483385	0.507072	0.52351	0.800929	0.710514	0.608356	0.405361	0.476308	0.656919	0.527783
166	0.560154	0.541972	0.60369	0.612336	0.71011	0.566557	0.566164	0.541097	0.604161	0.517252	0.469194	0.582181	0.513433	0.689564	0.676511	0.539826	0.526798	0.508665	0.49752	0.461941
167	0.510856	0.528646	0.56811	0.515906	0.594481	0.6198	0.6218	0.535192	0.635318	0.547748	0.506934	0.532536	0.492163	0.661692	0.669864	0.509828	0.512782	0.492433	0.481843	0.506527
168	0.433674	0.486266	0.57794	0.475875	0.602906	0.602463	0.619551	0.645906	0.516682	0.553234	0.493192	0.537739	0.563432	0.689372	0.807104	0.578425	0.45388	0.57098	0.562903	0.428519
169	0.471247	0.496627	0.611154	0.434137	0.611635	0.656848	0.562489	0.705978	0.560942	0.555654	0.572885	0.492685	0.565942	0.698162	0.655428	0.420874	0.583845	0.493664	0.54701	0.430781
170	0.416921	0.463986	0.562696	0.524611	0.687243	0.515345	0.525074	0.53586	0.574737	0.551432	0.535743	0.531616	0.561387	0.677614	0.654235	0.494173	0.478467	0.564637	0.553983	0.554983
171	0.568839	0.51028	0.581945	0.535402	0.722305	0.553545	0.585567	0.619501	0.531497	0.587094	0.570339	0.582156	0.614809	0.627691	0.626809	0.49762	0.515139	0.602196	0.549426	0.470267
172	0.483382	0.567058	0.607211	0.596613	0.48509	0.575555	0.592211	0.62836	0.67239	0.567062	0.583508	0.533956	0.578521	0.634647	0.730748	0.532584	0.460202	0.520108	0.510823	0.550852
173	0.534968	0.534454	0.660534	0.539867	0.588436	0.553856	0.529361	0.606648	0.636534	0.564999	0.578727	0.6187	0.678619	0.708192	0.648496	0.487111	0.422917	0.585652	0.618645	0.537825
174	0.501603	0.575247	0.622141	0.45929	0.585905	0.544432	0.590064	0.607789	0.548889	0.594308	0.564514	0.599733	0.751758	0.741033	0.606191	0.43254	0.527506	0.51158	0.364146	0.497657
175	0.518161	0.502461	0.775281	0.56561	0.512844	0.554721	0.595857	0.596639	0.456615	0.60113	0.518796	0.663189	0.642637	0.694984	0.564128	0.504342	0.546715	0.477695	0.51788	0.512012
176	0.481751	0.5342	0.603135	0.529718	0.502615	0.622254	0.601939	0.589605	0.577337	0.655618	0.593853	0.550413	0.580696	0.639811	0.658135	0.523425	0.477764	0.539817	0.799792	0.579092
177	0.569872	0.510555	0.749353	0.610885	0.438057	0.628916	0.59971	0.61945	0.577909	0.565507	0.548755	0.518178	0.574455	0.723976	0.588528	0.499903	0.429952	0.562608	0.736169	0.613307
178	0.523646	0.63441	0.827297	0.759733	0.493662	0.599369	0.541976	0.622659	0.593754	0.531666	0.524136	0.523759	0.584838	0.676753	0.566144	0.486737	0.546424	0.53065	0.555514	0.424106
179	0.526747	0.774585	0.573838	0.587029	0.432005	0.565154	0.692467	0.660377	0.670266	0.535539	0.566526	0.550143	0.552201	0.643643	0.492742	0.510196	0.568055	0.393117	0.615362	0.436473
180	0.505343	0.610912	0.734234	0.53393	0.644242	0.617056	0.678153	0.681498	0.617764	0.552394	0.58458	0.643994	0.579099	0.596799	0.450298	0.495597	0.585983	0.489306	0.586618	0.462366
181	0.47721	0.635463	0.651612	0.625021	0.532305	0.617368	0.61156	0.683849	0.625137	0.592005	0.58455	0.527773	0.601119	0.667629	0.435373	0.455865	0.483138	0.499879	0.520156	0.433322
182	0.55682	0.564047	0.691958	0.505122	0.391136	0.558099	0.676603	0.671487	0.645788	0.522965	0.606047	0.590989	0.607976	0.736605	0.483407	0.462853	0.489383	0.458107	0.450996	0.445568
183	0.448012	0.583741	0.640781	0.54175	0.506671	0.587706	0.681868	0.647375	0.655388	0.550861	0.54002	0.568213	0.566984	0.720422	0.538396	0.45717	0.541228	0.507292	0.48787	0.488859
184	0.412303	0.540915	0.696094	0.498802	0.344847	0.522608	0.584843	0.6254	0.524046	0.537383	0.539872	0.56748	0.60218	0.780518	0.467106	0.462961	0.552463	0.536753	0.619876	0.612072
185	0.574106	0.629079	0.629819	0.452729	0.370516	0.485362	0.612269	0.69404	0.663817	0.526958	0.608338	0.548124	0.58468	0.673826	0.411016	0.450423	0.592869	0.599296	0.394937	0.588955
186	0.508736	0.606837	0.667816	0.726044	0.511302	0.521196	0.697089	0.761655	0.645109	0.558237	0.555128	0.504038	0.580699	0.669051	0.407099	0.373359	0.603573	0.545753	0.622287	0.594836
187	0.546945	0.566447	0.646415	0.538092	0.444467	0.545587	0.629764	0.681674	0.671678	0.565518	0.631954	0.560126	0.610053	0.66277	0.409879	0.503253	0.635198	0.528215	0.507229	0.552813
188	0.616344	0.481838	0.560437	0.474191	0.532755	0.470916	0.492238	0.665062	0.574015	0.581427	0.65528	0.670421	0.538228	0.745275	0.502629	0.525565	0.585486	0.556566	0.492284	0.631524
189	0.531649	0.550112	0.704479	0.546551	0.443921	0.463791	0.571412	0.62431	0.555153	0.509808	0.698627	0.552362	0.587035	0.626109	0.47204	0.499934	0.451453	0.531693	0.587414	0.621083
190	0.579617	0.52651	0.615709	0.668131	0.514968	0.569159	0.631281	0.608351	0.59735	0.576966	0.599707	0.404323	0.627808	0.624735	0.530644	0.489193	0.539291	0.492498	0.585059	0.532741
191	0.482928	0.524841	0.635394	0.42501	0.491165	0.562515	0.611901	0.697016	0.636293	0.656599	0.64931	0.532999	0.646586	0.645809	0.48775	0.480937	0.53727	0.531324	0.617217	0.503362
192	0.551647	0.582954	0.59175	0.414726	0.470747	0.54944	0.58483	0.688855	0.609182	0.614918	0.616063	0.524389	0.615435	0.618674	0.444899	0.527281	0.479076	0.609397	0.502061	0.389586
193	0.451968	0.657066	0.612442	0.490829	0.422739	0.538469	0.634796	0.721992	0.612389	0.641373	0.579313	0.59659	0.611611	0.643012	0.406567	0.623009	0.507809	0.567207	0.652584	0.450442
194	0.477075	0.581451	0.643037	0.490993	0.537381	0.610955	0.663388	0.73644	0.649745	0.618556	0.623487	0.489838	0.599918	0.652366	0.470836	0.552387	0.642233	0.369955	0.585694	0.476339
195	0.497703	0.445088	0.570747	0.531839	0.399694	0.479453	0.586183	0.718887	0.60657	0.583048	0.644333	0.436697	0.61412	0.621613	0.488614	0.506334	0.515889	0.576984	0.41442	0.434122
196	0.470898	0.481516	0.550458	0.500472	0.468848	0.4852	0.604405	0.626245	0.625426	0.597483	0.589689	0.573631	0.539158	0.668614	0.481883	0.424826	0.516106	0.529592	0.506542	0.495684
197	0.476109	0.48555	0.568909	0.497989	0.49271	0.385265	0.589319	0.726751	0.666421	0.599841	0.663307	0.575984	0.620693	0.635771	0.516874	0.498491	0.49229	0.5709	0.538943	0.479874
198	0.503009	0.480972	0.609566	0.531686	0.408128	0.518129	0.560768	0.70142	0.604998	0.57122	0.586155	0.531878	0.609867	0.673844	0.500114	0.502685	0.440071	0.47539	0.594335	0.41343
199	0.49466	0.558799	0.591712	0.523877	0.356142	0.507638	0.616663	0.671747	0.660413	0.607251	0.640577	0.530153	0.586695	0.731072	0.512994	0.542405	0.591183	0.557526	0.589691	0.623341
200	0.509933	0.455597	0.542903	0.438542	0.450592	0.45929	0.552499	0.703886	0.635076	0.585544	0.62379	0.59355	0.562421	0.629418	0.521279	0.518385	0.644989	0.549332	0.490314	0.613165
201	0.627681	0.511148	0.505522	0.490487	0.422	0.570666	0.649164	0.633446	0.600545	0.61199	0.575351	0.5054	0.609823	0.713114	0.491106	0.565192	0.565324	0.585427	0.527897	0.499779
202	0.48916	0.580646	0.498639	0.519196	0.46133	0.688508	0.667667	0.702328	0.571458	0.587228	0.637116	0.556379	0.584712	0.626515	0.54048	0.555661	0.540085	0.568779	0.58227	0.636179
203	0.570436	0.54937	0.603895	0.429757	0.582158	0.549901	0.680236	0.680874	0.561397	0.625329	0.624213	0.577978	0.577502	0.614484	0.480167	0.58016	0.537262	0.574582	0.621087	0.275398
204	0.534884	0.531088	0.559845	0.515729	0.470839	0.463379	0.611309	0.645135	0.655138	0.63241	0.601507	0.621351	0.556395	0.607172	0.648278	0.546439	0.395445	0.588917	0.527871	0.641396
205	0.453866	0.512173	0.565826	0.458078	0.656303	0.522203	0.650876	0.584286	0.684981	0.610148	0.65919	0.594918	0.582686	0.666629	0.540348	0.615171	0.509958	0.526234	0.485866	0.497496
206	0.603692	0.579366	0.59293	0.518238	0.410529	0.555734	0.612691	0.695066	0.687661	0.547208	0.688723	0.686302	0.572061	0.669929	0.590553	0.552166	0.522341	0.539585	0.589289	0.590268
207	0.568112	0.556003	0.561454	0.493627	0.515553	0.668312	0.70198	0.705129	0.687209	0.587364	0.516906	0.596429	0.613353	0.740673	0.57431	0.582914	0.542075	0.61476	0.682337	0.648879
208	0.706686	0.61181	0.594618	0.446747	0.560013	0.595669	0.67738	0.750531	0.57564	0.556953	0.58832	0.59971	0.583358	0.672842	0.660279	0.564991	0.523066	0.596978	0.642647	0.613739
209	0.643259	0.49983	0.503514	0.50093	0.497131	0.713688	0.772508	0.66233	0.616848	0.65048	0.583481	0.492634	0.567763	0.748316	0.513327	0.554365	0.499605	0.604628	0.674116	0.562299
210	0.571546	0.563	0.492533	0.520184	0.614916	0.623409	0.729728	0.700833	0.590529	0.594462	0.666333	0.655496	0.532222	0.752731	0.569713	0.637231	0.469705	0.539538	0.55454	0.638755
211	0.516127	0.589176	0.458358	0.47015	0.473057	0.494525	0.605843	0.573518	0.591544	0.581202	0.563946	0.641316	0.600388	0.829177	0.588276	0.683019	0.533304	0.588412	0.583034	0.66933
212	0.525296	0.548657	0.501245	0.42354	0.573019	0.706826	0.55845	0.579366	0.61486	0.64055	0.61668	0.636229	0.52497	0.759408	0.668726	0.596159	0.490275	0.543536	0.641882	0.550772
213	0.543943	0.554146	0.463488	0.458011	0.49218	0.574609	0.750029	0.729641	0.657234	0.649126	0.582177	0.593487	0.564745	0.73269	0.551508	0.559867	0.471084	0.528663	0.528642	0.54113
214	0.607863	0.534349	0.460826	0.433933	0.628687	0.682325	0.695741	0.748079	0.71629	0.550967	0.560341	0.512165	0.544403	0.669176	0.632477	0.573626	0.476501	0.499588	0.498454	0.474659
215	0.517998	0.56584	0.431702	0.441808	0.331109	0.542012	0.630337	0.709325	0.729234	0.595392	0.663635	0.560362	0.597028	0.743579	0.552165	0.549562	0.541777	0.469069	0.506246	0.570334
216	0.537274	0.513131	0.474489	0.423722	0.3313	0.514527	0.655637	0.665475	0.647156	0.626249	0.601986	0.560977	0.617028	0.710943	0.598781	0.627467	0.51191	0.543171	0.589469	0.600102
217	0.640082	0.468628	0.45368	0.468942	0.351395	0.395367	0.613266	0.623236	0.639295	0.579326	0.59448	0.522306	0.599625	0.723295	0.637378	0.499513	0.567485	0.589962	0.4594	0.521035
218	0.578226	0.527816	0.435692	0.417121	0.316768	0.458477	0.701813	0.717476	0.779895	0.614084	0.572403	0.521648	0.630794	0.698866	0.62578	0.584039	0.437792	0.561463	0.565189	0.587214
219	0.56517	0.507309	0.461804	0.409407	0.391503	0.550037	0.817743	0.741081	0.698855	0.604818	0.595841	0.566885	0.602844	0.639936	0.666785	0.516276	0.467418	0.490286	0.536944	0.571658
220	0.532467	0.449633	0.437017	0.386234	0.462226	0.673208	0.642866	0.861759	0.799341	0.589544	0.536045	0.49982	0.58772	0.655196	0.581765	0.559561	0.470372	0.466967	0.468771	0.616012
221	0.606629	0.490314	0.45227	0.459034	0.305226	0.63971	0.636379	0.749463	0.629038	0.581374	0.55196	0.482703	0.578615	0.675161	0.480958	0.526345	0.484623	0.381283	0.598782	0.672872
222	0.635292	0.494801	0.500512	0.515781	0.747862	0.636736	0.695328	0.713394	0.702877	0.59763	0.554731	0.569163	0.590324	0.663292	0.5635	0.492703	0.503678	0.479298	0.404199	0.531426
223	0.663013	0.607786	0.537427	0.446909	0.625248	0.536104	0.67145	0.668715	0.70446	0.616999	0.578092	0.566687	0.59876	0.674797	0.559492	0.539303	0.474564	0.542546	0.53276	0.52804
224	0.466413	0.505126	0.465804	0.468432	0.355826	0.442985	0.61276	0.657905	0.672999	0.590106	0.552332	0.564044	0.598794	0.749514	0.46749	0.576616	0.486354	0.511617	0.495249	0.463055
225	0.56338	0.561145	0.450723	0.412188	0.321805	0.549542	0.594857	0.666953	0.582578	0.553239	0.581011	0.386837	0.512342	0.65618	0.514206	0.473444	0.481124	0.500629	0.503	0.545224
226	0.497184	0.623481	0.386593	0.470928	0.35318	0.314791	0.54884	0.653522	0.635796	0.578048	0.578247	0.529264	0.565008	0.764807	0.636447	0.488134	0.547678	0.349855	0.548902	0.523012
227	0.435681	0.51369	0.459472	0.473696	0.351229	0.389057	0.477838	0.628932	0.631793	0.620379	0.536982	0.544767	0.560232	0.747166	0.535287	0.476566	0.499829	0.543261	0.688769	0.564069
228	0.492191	0.54167	0.530648	0.444577	0.40344	0.37422	0.688819	0.695963	0.607049	0.630251	0.529788	0.5507	0.575376	0.766084	0.458035	0.509388	0.565657	0.58467	0.585251	0.637062
229	0.543041	0.476234	0.436197	0.517547	0.402572	0.306929	0.582635	0.642974	0.600559	0.60207	0.597151	0.495127	0.571978	0.631232	0.498231	0.499892	0.568089	0.638788	0.494427	0.552621
230	0.56789	0.419694	0.426706	0.475984	0.413222	0.299976	0.641941	0.709077	0.655329	0.641846	0.505913	0.520887	0.499948	0.600488	0.61438	0.530706	0.510457	0.589511	0.519706	0.544449
231	0.434968	0.544573	0.427549	0.416984	0.476567	0.592964	0.588558	0.801333	0.575928	0.605441	0.538174	0.506891	0.551188	0.706184	0.543755	0.478092	0.468075	0.529465	0.483945	0.637256
232	0.391001	0.478908	0.527834	0.501488	0.452894	0.562966	0.641824	0.797877	0.638381	0.654049	0.533437	0.5204	0.562439	0.614776	0.572218	0.510366	0.572625	0.505071	0.452983	0.601937
233	0.593988	0.506042	0.415524	0.515103	0.408744	0.523265	0.645681	0.632294	0.657544	0.646141	0.603439	0.545155	0.545282	0.632197	0.61318	0.541194	0.487833	0.547933	0.589865	0.616668
234	0.496767	0.401814	0.554225	0.473474	0.444791	0.441348	0.634513	0.67494	0.742692	0.606969	0.591032	0.549837	0.628061	0.573393	0.555282	0.4973	0.601433	0.569446	0.626336	0.650411
235	0.461413	0.490799	0.629621	0.495172	0.444028	0.493268	0.751485	0.712811	0.659807	0.597637	0.584228	0.564362	0.600253	0.591116	0.593977	0.520134	0.619379	0.538527	0.563598	0.642858
236	0.496639	0.516911	0.520968	0.448632	0.431514	0.31785	0.686229	0.67853	0.742197	0.562036	0.591703	0.538166	0.630688	0.664345	0.540944	0.530308	0.582476	0.610633	0.654793	0.500632
237	0.616614	0.460669	0.548299	0.475824	0.339386	0.501442	0.604769	0.677856	0.70153	0.56467	0.570371	0.561757	0.640231	0.676785	0.632353	0.56562	0.61078	0.551667	0.656369	0.695719
238	0.465332	0.557276	0.59526	0.465024	0.482523	0.501777	0.709564	0.653477	0.725773	0.601344	0.593747	0.528321	0.545467	0.560221	0.634531	0.560463	0.54269	0.601288	0.625041	0.632017
239	0.57336	0.492052	0.531622	0.438979	0.419503	0.362628	0.560743	0.605011	0.669366	0.605487	0.588156	0.547052	0.51306	0.583335	0.486474	0.526069	0.489826	0.551185	0.35405	0.255981

## Sheet: Supplement 2B
	Cell 0	Cell 1	Cell 2	Cell 3	Cell 4	Cell 5	Cell 6	Cell 7	Cell 8
0	0.0570583	0.0316816	-0.0114831	0.0208598	0.0209665	0.0295448	0.0603184	0.0555364	-0.159022
1	0.0485339	-0.00245204	0.0185518	-0.0735356	-0.0412746	-0.0352674	0.0113404	0.0137846	-0.121177
2	-0.0485749	-0.0167383	0.0283857	-0.084803	-0.00923982	0.02137	0.0049042	0.018865	0.336362
3	-0.0313599	0.00215927	-0.0444393	0.127683	0.0190674	0.0216006	-0.0194124	-0.0391745	-0.0814037
4	-0.0256575	-0.0146505	0.00898495	0.00979595	0.0104805	-0.037248	-0.0571506	-0.0490116	0.0252409
5	-0.039001	0.00486457	-0.219791	-0.137571	0.0446052	-0.0249474	0.00824601	-0.0385257	0.433734
6	-0.0195859	-0.0350721	-0.186052	-0.0713828	-0.00595586	-0.00739893	0.294373	-0.0254989	0.478542
7	0.0086848	0.0016687	-0.173267	-0.153716	0.0169965	0.00626876	0.498565	0.0632263	0.549639
8	0.0501538	0.0505765	-0.00449561	-0.139505	-0.012593	-0.0202311	0.723491	0.178507	0.683813
9	0.180572	0.0882168	-0.134957	-0.0306685	0.0816525	-0.0551038	0.847753	0.215319	0.703773
10	0.275706	0.20112	0.215617	-0.0610587	0.162256	-0.0270355	0.830404	0.219293	0.724393
11	0.373306	0.307079	0.268419	0.10177	0.12445	0.0179296	0.750809	0.23026	0.713137
12	0.459243	0.36063	0.0878606	0.149703	0.129831	0.00322175	0.78208	0.293661	0.742527
13	0.514442	0.429064	0.105409	0.369283	0.118143	0.019204	0.757805	0.513541	0.865483
14	0.59271	0.480583	0.162748	0.26825	0.106364	0.0525251	0.837377	0.519219	0.840334
15	0.617085	0.601516	0.624902	0.347887	0.107069	0.11482	0.880635	0.529251	0.863625
16	0.65415	0.571554	0.354917	0.0861453	0.190885	0.098193	0.890751	0.484362	0.927596
17	0.696811	0.580576	0.466298	0.266914	0.272795	0.141965	0.892784	0.404288	0.927386
18	0.81009	0.612584	0.353442	0.162453	0.350248	0.208523	0.934819	0.444377	0.886076
19	0.819285	0.651968	0.256442	0.17396	0.416962	0.18567	0.956747	0.353427	0.910893
20	0.843507	0.725217	0.242352	-0.019641	0.430329	0.163569	0.898116	0.459246	0.933633
21	0.807817	0.67561	0.614855	0.0272632	0.546616	0.170202	0.946074	0.388247	0.96886
22	0.803408	0.686184	0.604558	0.528984	0.555014	0.241353	0.895084	0.402209	1
23	0.730903	0.72244	0.305484	0.645302	0.666869	0.23269	0.91999	0.429545	0.970365
24	0.740659	0.770616	0.200337	0.803694	0.562245	0.267789	0.929308	0.497692	0.895613
25	0.784479	0.747698	0.628271	0.744387	0.653191	0.219695	0.987339	0.442809	0.811076
26	0.737648	0.690426	0.490052	0.730823	0.683567	0.32596	0.866144	0.545555	0.842248
27	0.774147	0.622328	0.338714	0.825891	0.70392	0.357698	0.894308	0.442752	0.815707
28	0.745592	0.590779	0.234609	0.767581	0.690276	0.30808	0.872626	0.52898	0.862114
29	0.739428	0.616965	0.256646	0.341525	0.755118	0.358956	0.929981	0.571345	0.80357
30	0.742779	0.650907	0.0739901	0.691657	0.751414	0.291042	0.891663	0.567907	0.789344
31	0.693242	0.662559	0.120104	0.700619	0.832829	0.304859	1	0.578528	0.824038
32	0.748035	0.736572	0.228836	0.923134	0.787144	0.376426	0.912794	0.619681	0.876768
33	0.74893	0.761507	0.286695	0.58615	0.814611	0.376995	0.921305	0.631478	0.864771
34	0.792436	0.673663	0.29917	0.899068	0.888894	0.386576	0.875629	0.718914	0.831152
35	0.829932	0.61217	0.447864	0.470673	0.859706	0.375604	0.87624	0.754078	0.84886
36	0.826902	0.723321	0.264604	0.498341	0.86714	0.405208	0.965124	0.777124	0.833242
37	0.903055	0.726885	0.475293	0.529317	0.850782	0.446275	0.910914	0.735525	0.850611
38	0.93565	0.783037	0.537877	0.386685	0.841508	0.508339	0.832966	0.738006	0.824302
39	0.942074	0.831481	0.470567	0.30087	0.844455	0.543828	0.765784	0.778292	0.828068
40	0.902545	0.809169	0.51333	0.172064	0.786768	0.567378	0.787166	0.835976	0.835851
41	0.950733	0.817644	0.375581	0.320446	0.833095	0.530333	0.831898	0.826753	0.828335
42	0.863374	0.920591	0.568499	0.445456	0.832869	0.60281	0.82878	0.865231	0.774859
43	0.912674	0.87376	0.609845	0.718001	0.834345	0.619261	0.840793	0.964623	0.798743
44	0.961257	0.832653	0.591642	0.637147	0.825435	0.692139	0.814294	0.921235	0.773182
45	0.91554	0.89039	0.569917	0.0772035	0.78626	0.710964	0.74143	0.970176	0.764563
46	0.879923	0.898889	0.396769	0.634871	0.809183	0.694859	0.774518	0.810807	0.760812
47	0.930671	0.888069	0.621065	0.374404	0.831377	0.78834	0.734968	0.930715	0.769871
48	0.957887	0.889081	0.504096	0.546715	0.831929	0.821829	0.71427	0.819125	0.756819
49	0.942968	0.886409	0.371435	0.391065	0.851942	0.770145	0.734966	0.842215	0.784848
50	0.979761	0.817155	0.627674	0.446612	0.821877	0.860803	0.746756	0.859972	0.7969
51	0.959453	0.753567	0.573058	-0.173266	0.84583	0.909341	0.772493	0.89267	0.763842
52	0.943975	0.656367	0.696883	0.0764614	0.90944	0.945893	0.845924	0.930637	0.71126
53	0.933577	0.645832	0.592157	0.286059	0.858755	0.957473	0.807747	0.864449	0.704981
54	0.96439	0.678558	0.533695	0.434352	0.918667	0.843	0.790991	0.919527	0.712742
55	0.904693	0.704839	0.581373	0.192979	0.898793	0.875317	0.877124	0.935033	0.752947
56	0.933657	0.747004	0.437652	0.0203466	0.882756	0.828118	0.879497	0.950686	0.758242
57	0.934384	0.579614	0.714534	0.0269384	0.944809	0.918568	0.874393	0.89633	0.745516
58	0.878087	0.593955	0.654244	0.155582	0.874028	0.976	0.866178	0.952509	0.73237
59	0.866325	0.634145	0.358672	0.389171	0.85284	0.980132	0.888904	0.912003	0.707389
60	0.917922	0.678403	0.419383	0.555684	0.855522	1	0.939235	1	0.713972
61	0.933916	0.619541	0.511261	1	0.925815	0.917184	0.930778	0.990802	0.657164
62	1	0.679847	0.533241	0.76579	0.924814	0.844793	0.802686	0.971763	0.6897
63	0.961658	0.724873	0.659515	0.499911	0.960541	0.922333	0.762142	0.943736	0.717035
64	0.968489	0.629052	0.546448	0.407204	0.957184	0.971939	0.768956	0.926415	0.681954
65	0.927786	0.654976	0.648405	0.489715	1	0.982688	0.817048	0.960237	0.602336
66	0.90323	0.78717	0.651129	0.454634	0.977898	0.939982	0.891676	0.9734	0.577698
67	0.857338	1	0.510917	0.360054	0.932265	0.888445	0.812874	0.953788	0.459549
68	0.735189	0.96121	0.672563	0.647574	0.86535	0.839663	0.79749	0.836671	0.539431
69	0.643876	0.946762	0.577998	0.575396	0.800416	0.815316	0.735396	0.710428	0.495835
70	0.618078	0.932353	0.606539	0.493491	0.788431	0.839246	0.713014	0.693185	0.368718
71	0.637508	0.848595	0.633654	0.596237	0.694636	0.756002	0.730076	0.680046	0.392216
72	0.537743	0.755931	0.708658	0.45939	0.576321	0.74007	0.645778	0.71914	0.280144
73	0.52337	0.724221	0.531988	0.584906	0.592012	0.695048	0.625209	0.649376	0.136882
74	0.510564	0.606363	0.599615	0.348515	0.609601	0.714708	0.595261	0.685879	0.166326
75	0.467454	0.546464	0.815802	0.270345	0.57497	0.76934	0.575671	0.668681	0.157537
76	0.481133	0.589434	1	0.327047	0.468296	0.72077	0.589703	0.578844	0.159138
77	0.454338	0.554416	0.60386	0.139117	0.44052	0.729411	0.505779	0.516563	0.186417
78	0.430571	0.406596	0.590288	0.110663	0.334026	0.767565	0.495506	0.481104	0.176434
79	0.473091	0.457014	0.709511	0.105736	0.293462	0.760274	0.487389	0.505144	-0.0168733
80	0.449094	0.449496	0.557884	0.166287	0.287293	0.734806	0.314634	0.448187	-0.0264625
81	0.451501	0.450177	0.23203	0.0731676	0.234133	0.717398	0.307672	0.349863	0.0038122
82	0.449191	0.414138	0.403246	-0.2326	0.299398	0.731393	0.335967	0.221933	0.0844442
83	0.447997	0.449289	0.372089	-0.105283	0.350273	0.663728	0.299924	0.245111	-0.0790496
84	0.451115	0.467183	0.56379	-0.0293195	0.268755	0.712575	0.325978	0.254015	-0.208126
85	0.441123	0.434699	0.413732	0.0375118	0.318827	0.602643	0.239385	0.409127	-0.133934
86	0.370444	0.402441	0.397008	0.223706	0.309417	0.560476	0.339274	0.392904	-0.027004
87	0.397045	0.362475	0.268842	0.171637	0.236499	0.618938	0.227234	0.438217	-0.139484
88	0.388245	0.344396	0.332439	0.384084	0.233199	0.545133	0.281336	0.434921	-0.142437
89	0.391022	0.342122	0.270399	0.578164	0.229293	0.596752	0.237932	0.448879	-0.224075
90	0.348023	0.321986	0.0190862	0.582698	0.0934018	0.545244	0.329647	0.387991	-0.148189
91	0.37476	0.3277	0.307481	0.447891	0.0736757	0.558217	0.406014	0.446129	-0.223661
92	0.339297	0.364015	0.211026	0.525264	0.0934476	0.559465	0.373554	0.275117	-0.0631433
93	0.289782	0.331873	0.16302	0.38977	0.28186	0.544357	0.321465	0.181893	-0.200987
94	0.375716	0.311721	0.0461547	0.336042	0.0958144	0.527333	0.288227	0.120002	-0.0691781
95	0.351998	0.320177	-0.0248958	0.315735	0.111035	0.559726	0.266805	0.131398	-0.188983
96	0.338202	0.286338	-0.169207	0.0644198	0.0975401	0.568063	0.273776	0.17908	-0.1869
97	0.289723	0.269437	-0.0535003	0.291356	0.189376	0.567051	0.217143	0.246223	-0.272162
98	0.351509	0.284694	-0.115902	0.370423	0.30862	0.570239	0.114004	0.221961	-0.170384
99	0.32113	0.206248	0.0374401	0.429929	0.367305	0.515414	0.181863	0.030753	0.0242157
100	0.327807	0.248292	-0.00722588	0.143124	0.288825	0.470074	0.210758	0.113974	-0.0885892
101	0.340202	0.215017	0.087387	0.126782	0.257316	0.487457	0.270807	0.0699324	-0.330324
102	0.296951	0.184475	-0.0409588	0.308523	0.287743	0.46175	0.243149	0.0553629	-0.334236
103	0.253315	0.158653	0.0734725	0.177787	0.22914	0.447873	0.256074	0.0848256	-0.247804
104	0.193441	0.172565	0.33775	0.262458	0.115094	0.530367	0.290804	0.0912033	-0.160062
105	0.193211	0.167263	0.220767	0.0878347	0.0924876	0.459302	0.252982	0.0173182	-0.249671
106	0.243233	0.209739	0.143889	-0.256257	0.155487	0.4135	0.160435	-0.0275493	-0.2115
107	0.261321	0.208592	0.439016	-0.24271	0.132572	0.506218	0.232654	0.0329294	-0.0737232
108	0.2459	0.218253	0.268978	-0.236914	0.198168	0.441079	0.252525	-0.00217703	-0.249525
109	0.246821	0.184905	0.012282	-0.375001	0.243957	0.426223	0.171606	0.016418	-0.213303
110	0.219079	0.171401	0.149712	-0.300276	0.305792	0.481626	0.26965	-0.0123808	-0.191811
111	0.241286	0.15082	0.0027263	-0.378447	0.220604	0.502749	0.203199	-0.0401378	-0.0282925
112	0.229707	0.177971	-0.148183	0.150478	0.22737	0.491462	0.121717	-0.152722	-0.012011
113	0.208841	0.140566	-0.189804	-0.420626	0.119921	0.406679	0.194504	-0.130149	-0.043781
114	0.259538	0.138924	-0.180409	0.0424787	0.155447	0.418397	0.175324	-0.115112	-0.045859
115	0.209613	0.177849	-0.117127	-0.0869356	0.16868	0.418974	0.152883	-0.0621156	0.0443625
116	0.295366	0.186049	-0.00912189	-0.0313571	0.231586	0.396817	0.0986085	-0.167502	-0.0246674
117	0.182984	0.132846	-0.151421	-0.00120269	0.170876	0.420548	0.137562	-0.160726	-0.0954092
118	0.258451	0.163276	-0.199237	-0.0786722	0.211521	0.414188	0.122113	-0.119013	-0.0348319
119	0.286892	0.124166	-0.0934396	0.00686172	0.156141	0.481122	0.172067	-0.0219044	-0.162495
120	0.282025	0.162652	-0.249534	-0.0547308	0.0711069	0.420119	0.0593879	-0.0624627	-0.144681
121	0.231914	0.105206	-0.176426	-0.0608127	0.109502	0.434955	0.129409	-0.0592361	-0.112355
122	0.281539	0.121369	-0.346663	0.0172675	0.095771	0.477355	0.117565	-0.0121092	-0.256915
123	0.29278	0.147425	-0.485103	-0.143313	-0.0251677	0.482154	0.188241	-0.0958459	-0.225512
124	0.30478	0.135098	-0.242144	-0.0174337	0.0571559	0.482186	0.107805	-0.12538	-0.22977
125	0.263059	0.100497	-0.270874	-0.113324	0.043792	0.434405	0.0637037	-0.130726	-0.101379
126	0.269273	0.14	-0.0884337	-0.21903	0.0686901	0.38591	-0.0550231	-0.00900857	-0.105936
127	0.285683	0.138566	0.038705	-0.205541	0.125483	0.465762	0.106603	-0.00283358	-0.232551
128	0.28753	0.129756	0.225375	-0.149088	0.0935699	0.417907	0.0975926	-0.0355115	-0.259894
129	0.212673	0.0852415	-0.0810097	-0.179372	0.105876	0.411598	0.0763022	-0.0565954	-0.317402
130	0.22171	0.0699374	0.12621	-0.149437	0.123165	0.384317	0.0713433	0.0261769	-0.264719
131	0.23268	0.0953638	-0.0131641	-0.233909	0.07078	0.354626	-0.0536115	-0.0446233	-0.266646
132	0.228415	0.0921264	-0.132287	-0.117184	0.123003	0.39144	-0.0568325	-0.025389	-0.302157
133	0.219896	0.100397	0.16459	-0.118859	0.018073	0.360545	-0.0596171	0.0121193	-0.284317
134	0.256906	0.0760731	-0.00538704	-0.216014	0.0893559	0.336139	-0.196922	-0.060193	-0.410271
135	0.254227	0.076098	-0.0057255	-0.160403	0.0944164	0.349216	0.0168961	-0.0783839	-0.308755
136	0.240838	0.104557	-0.103103	-0.453397	0.0721943	0.310672	-0.0513051	0.0422243	-0.310924
137	0.295659	0.091739	-0.301112	-0.372524	0.0248235	0.340985	-0.0503216	-0.0918401	-0.376208
138	0.26195	0.0868349	-0.289257	-0.28276	0.0870477	0.383546	-0.130197	-0.0903773	-0.366886
139	0.254272	0.108627	-0.258869	-0.213185	0.00508154	0.323714	-0.0693211	-0.160954	-0.336101
140	0.271477	0.113708	-0.350239	-0.156612	-0.0186241	0.36183	-0.0380495	-0.178058	-0.354795
141	0.25235	0.0885571	-0.360797	-0.225695	-0.0301427	0.350934	-0.102409	-0.0715511	-0.257638
142	0.276336	0.0585773	-0.232448	-0.0982833	0.0206831	0.327404	-0.0839118	-0.0800418	-0.251908
143	0.285408	0.0877612	-0.302229	-0.111836	-0.0584468	0.363387	-0.0816448	-0.0362032	-0.383841
144	0.274692	0.077905	-0.331414	0.0167881	0.0065787	0.377512	-0.0523487	-0.00438721	-0.320194
145	0.265479	0.0971685	-0.297426	-0.0322904	0.104548	0.351067	-0.0905952	-0.0613882	-0.263442
146	0.227453	0.0832466	-0.264643	-0.067949	0.0930908	0.325971	-0.0305297	-0.0557554	-0.314955
147	0.282448	0.0774007	-0.204123	0.0119244	0.088131	0.313996	0.0307056	-0.031022	-0.245494
148	0.262642	0.0758242	-0.309153	-0.162804	0.110517	0.394993	-0.00491901	-0.0191965	-0.304554
149	0.292791	0.0297971	-0.241347	-0.142033	0.0673997	0.299819	-0.026921	0.0313696	-0.377026
150	0.346415	0.0519373	-0.323535	-0.145311	0.083778	0.223583	-0.0432383	0.0661071	-0.395707
151	0.338096	0.0385196	-0.331294	-0.0947782	-0.0227437	0.273102	-0.100449	0.0554756	-0.284123
152	0.26852	0.0701682	-0.258576	-0.0804352	0.0375898	0.306959	-0.146152	-0.0555889	-0.262896
153	0.339208	0.0317576	-0.369844	-0.106544	0.130876	0.254824	-0.0456922	-0.020794	-0.287443
154	0.324132	0.0615165	-0.498894	-0.123903	0.0888235	0.250945	-0.084623	0.00486369	-0.320106
155	0.34503	0.0889741	-0.56111	-0.216133	0.00793976	0.297908	-0.155456	-0.0514438	-0.316119
156	0.389431	0.0700953	-0.538718	-0.0127028	-0.00888985	0.291493	-0.179935	-0.0379405	-0.39263
157	0.333469	0.029431	-0.411603	-0.0562703	-0.0182885	0.361353	-0.0553834	0.0351754	-0.420347
158	0.291435	0.0454573	-0.507621	-0.132267	0.00941607	0.428465	-0.170354	0.00381766	-0.404902
159	0.302958	0.0230032	-0.553185	-0.0337191	0.0470817	0.514166	-0.285362	0.160007	-0.434408
160	0.248917	0.0447829	-0.439463	-0.104207	0.0495918	0.463999	-0.308942	0.0982429	-0.369817
161	0.26084	0.0776314	-0.441332	-0.146544	0.089165	0.404058	-0.27933	0.0325496	-0.356127
162	0.25612	0.0747313	-0.439215	-0.0484819	0.0394509	0.386343	-0.247832	-0.0615094	-0.191448
163	0.201415	0.0965762	-0.446567	-0.0431449	-0.00930839	0.380076	-0.362804	0.0597248	-0.233613
164	0.279381	0.07376	-0.381953	-0.146944	0.0557053	0.368863	-0.363431	-0.0215617	-0.259865
165	0.262	0.0738094	-0.467487	0.0159158	-0.0715528	0.372674	-0.350514	0.0226379	-0.273106
166	0.259875	0.0464179	-0.425013	-0.107666	-0.0439323	0.322507	-0.270361	-0.0673783	-0.311728
167	0.251612	0.0552608	-0.244499	-0.0453298	-0.0956516	0.286602	-0.25767	-0.00359524	-0.0624308
168	0.253326	0.0635029	-0.231173	-0.0910673	0.00557317	0.336221	-0.309958	-0.110242	-0.21265
169	0.309246	0.0492442	-0.446847	-0.112403	0.00988922	0.267597	-0.289065	-0.0641484	-0.220975
170	0.214702	0.049256	-0.248318	-0.136291	0.150615	0.294966	-0.30806	-0.0246744	-0.285725
171	0.293044	0.0768914	-0.392369	-0.167649	0.11541	0.307919	-0.289757	-0.00158942	-0.200905
172	0.296054	0.0901992	-0.404409	-0.241782	0.137625	0.300214	-0.307122	-0.0497691	-0.225816
173	0.343625	0.0386941	-0.529417	-0.12588	0.0745724	0.332996	-0.322502	-0.0705263	-0.332067
174	0.336906	0.0230455	-0.397504	-0.34198	0.0480944	0.285745	-0.370086	-0.0718175	-0.260083
175	0.285181	0.0284034	-0.479217	-0.160517	-0.0212016	0.300428	-0.343731	-0.154604	-0.32112
176	0.290678	0.049508	-0.37053	-0.327574	0.0386297	0.253886	-0.337045	-0.155546	-0.295036
177	0.336427	0.0515298	-0.46612	-0.557626	-0.0867978	0.310303	-0.422787	-0.16137	-0.251286
178	0.300036	0.00111687	-0.338227	-0.274622	-0.0633304	0.301676	-0.433314	-0.118659	-0.317708
179	0.297792	0.0211565	-0.405928	-0.251549	0.0223623	0.315857	-0.490395	-0.131174	-0.216929
180	0.291209	0.0173025	-0.378816	-0.364061	-0.0170405	0.212725	-0.422972	-0.107248	-0.372931
181	0.304689	0.00272273	-0.424877	-0.491992	0.0418259	0.284123	-0.479928	-0.153477	-0.263917
182	0.292299	0.00692948	-0.394541	-0.384143	0.0423852	0.236994	-0.416398	-0.140878	-0.292029
183	0.270183	0.0202093	-0.489086	-0.275377	0.0203134	0.311571	-0.475753	-0.144985	-0.202917
184	0.275667	0.0473805	-0.443158	-0.268215	-0.00101201	0.311945	-0.531191	-0.200863	-0.341283
185	0.285797	0.0240548	-0.280211	-0.388299	0.0101435	0.260709	-0.413685	-0.0896127	-0.311156
186	0.300958	0.0285133	-0.547395	-0.306869	-0.00197437	0.292387	-0.531785	-0.0957434	-0.311511
187	0.299941	-0.00948029	-0.453903	-0.21101	-0.00969592	0.320768	-0.555988	-0.096988	-0.320894
188	0.275036	0.0148768	-0.383159	-0.255225	0.00329016	0.345391	-0.454092	0.0416784	-0.298121
189	0.25533	0.0145103	-0.473252	-0.101	0.0516614	0.328764	-0.467381	-0.0781999	-0.380391
190	0.264041	0.0492483	-0.564447	-0.162972	0.0119546	0.333693	-0.448476	0.0998112	-0.395248
191	0.31845	0.0224385	-0.587799	-0.316147	0.072042	0.364505	-0.424931	0.0908353	-0.53968
192	0.268989	0.00273172	-0.472099	-0.331249	0.0803198	0.450522	-0.474308	0.214343	-0.499449
193	0.303375	0.0289946	-0.495607	-0.373904	0.0291217	0.349023	-0.438829	0.0801842	-0.402506
194	0.337063	0.0314927	-0.395656	-0.266603	0.0752651	0.330006	-0.394742	0.0667916	-0.354302
195	0.249442	0.0147849	-0.399957	-0.261615	0.0244334	0.304537	-0.387235	-0.000801749	-0.304759
196	0.240078	0.0139115	-0.5135	-0.39815	0.011035	0.310383	-0.423847	-0.103157	-0.370695
197	0.276819	0.0367104	-0.657645	-0.372228	0.0205408	0.345439	-0.456992	-0.13516	-0.366597
198	0.266274	0.0330763	-0.463701	-0.370786	0.0271412	0.331826	-0.491842	-0.220526	-0.461407
199	0.297524	0.0107678	-0.456474	-0.326167	0.0196804	0.301981	-0.530033	-0.258725	-0.371164
200	0.279178	0.0142222	-0.42654	-0.30665	0.042225	0.310256	-0.499372	-0.276471	-0.408276
201	0.315654	0.00877328	-0.20449	-0.393991	0.047111	0.319664	-0.573421	-0.16651	-0.348332
202	0.288706	-0.0376166	-0.405642	-0.12732	-0.0197772	0.322469	-0.485349	-0.284859	-0.391436
203	0.302593	0.0258582	-0.406869	-0.233836	0.00831944	0.347347	-0.491828	-0.184248	-0.317917
204	0.270484	0.00463186	-0.410129	-0.240883	0.0383342	0.345575	-0.534871	-0.242013	-0.258988
205	0.3335	0.0139468	-0.53366	-0.353366	0.0244093	0.339496	-0.547267	-0.0329343	-0.32742
206	0.3446	0.0141634	-0.527899	-0.270476	-0.0224845	0.28882	-0.551414	0.110182	-0.342967
207	0.364163	-0.0074454	-0.495939	-0.218735	-0.0359505	0.290549	-0.538602	0.154014	-0.338056
208	0.364518	0.00521834	-0.554472	-0.382797	-0.0419121	0.272665	-0.468909	0.131852	-0.33425
209	0.387224	-0.00636154	-0.536799	-0.513993	-0.0825844	0.304202	-0.496648	0.170195	-0.294136
210	0.375389	-0.00646975	-0.470432	-0.587849	-0.0458034	0.299175	-0.485234	0.346413	-0.317744
211	0.343754	0.0223625	-0.590771	-0.508747	-0.0754468	0.25487	-0.492762	0.350424	-0.393539
212	0.356744	0.0131157	-0.435867	-0.433486	-0.0567006	0.335269	-0.418086	0.511428	-0.422661
213	0.366564	0.0181264	-0.470793	-0.35021	-0.108811	0.332597	-0.536764	0.49281	-0.34636
214	0.297645	0.0600789	-0.55655	-0.421467	-0.0925874	0.322293	-0.459446	0.507631	-0.289646
215	0.333799	0.0277483	-0.497569	-0.463198	-0.103965	0.304835	-0.506952	0.509199	-0.349075
216	0.307271	-0.0153988	-0.563178	-0.471933	-0.0852612	0.295037	-0.495751	0.558663	-0.369239
217	0.303389	0.0264862	-0.554027	-0.370598	-0.143499	0.257091	-0.471889	0.604969	-0.328332
218	0.339111	0.00947556	-0.439421	-0.292624	-0.114952	0.238341	-0.473969	0.53802	-0.31759
219	0.325857	0.00309115	-0.348356	-0.437813	-0.0832117	0.23326	-0.474075	0.484943	-0.301655
220	0.305094	0.021087	-0.488347	-0.215295	-0.164195	0.267322	-0.513688	0.573583	-0.225484
221	0.27031	0.0192395	-0.523537	-0.348561	-0.139363	0.27148	-0.451862	0.544634	-0.365412
222	0.313536	0.0455583	-0.558752	-0.3301	-0.113754	0.294792	-0.514541	0.357613	-0.199787
223	0.307177	0.00753199	-0.518188	-0.277795	-0.109731	0.312498	-0.543109	0.26233	-0.291131
224	0.299346	0.00583711	-0.522052	-0.346349	-0.113517	0.33686	-0.608488	0.338779	-0.339254
225	0.196545	0.0341496	-0.468432	-0.321323	-0.101198	0.333703	-0.579475	0.452077	-0.324236
226	0.22563	-0.00940313	-0.391378	-0.223485	-0.0899089	0.316397	-0.529389	0.286544	-0.336893
227	0.26704	-0.0413459	-0.580805	-0.159455	-0.0861619	0.331372	-0.470451	0.301768	-0.294456
228	0.307133	-0.0361611	-0.590893	-0.260684	-0.114287	0.349358	-0.573449	0.321311	-0.2989
229	0.231488	-0.0169958	-0.538582	-0.287492	-0.0283953	0.394639	-0.526163	0.256124	-0.297438
230	0.216774	-0.015762	-0.694083	-0.138359	-0.0545505	0.359038	-0.442161	0.234318	-0.353213
231	0.279193	0.00473967	-0.616851	-0.0556584	-0.0466311	0.29332	-0.405284	0.260499	-0.216491
232	0.269115	-0.0469485	-0.555626	-0.0426773	0.0591051	0.319071	-0.413868	0.267033	-0.246693
233	0.275854	-0.0472447	-0.56792	-0.1992	-0.02236	0.298823	-0.4463	0.139702	-0.293746
234	0.296498	-0.0110214	-0.525382	-0.323874	-0.00921476	0.28278	-0.467201	0.166596	-0.241169
235	0.314629	-0.025094	-0.532264	-0.176091	0.0120679	0.313438	-0.504797	0.204622	-0.288829
236	0.338918	-0.0252349	-0.633681	-0.283576	-0.0282469	0.308583	-0.537333	0.142553	-0.167836
237	0.32626	-0.0148196	-0.671845	-0.307145	-0.0289934	0.389772	-0.438004	0.142325	-0.123099
238	0.315444	0.00708307	-0.693372	-0.295744	-0.0307425	0.406298	-0.429657	0.0980346	-0.150604
239	0.257048	-0.0137567	-0.579665	-0.449437	-0.081528	0.276209	-0.421106	0.125913	-0.196815

## Sheet: Supplement 2E
time (min)	EGFRp	time fit	fit EGFRp		time (min)	EGFRp	time fit	fit EGFRp
0	0.0316816	65	1.12023		0	0.0209665	65	1.01886
1	-0.00245204	66	1.04207		1	-0.0412746	66	0.967891
2	-0.0167383	67	0.962745		2	-0.00923982	67	0.903449
3	0.00215927	68	0.890403		3	0.0190674	68	0.838895
4	-0.0146505	69	0.825675		4	0.0104805	69	0.777817
5	0.00486457	70	0.768053		5	0.0446052	70	0.721463
6	-0.0350721	71	0.716758		6	-0.00595586	71	0.670115
7	0.0016687	72	0.670998		7	0.0169965	72	0.623613
8	0.0505765	73	0.630048		8	-0.012593	73	0.581609
9	0.0882168	74	0.59327		9	0.0816525	74	0.543688
10	0.20112	75	0.560117		10	0.162256	75	0.509428
11	0.307079	76	0.53012		11	0.12445	76	0.478427
12	0.36063	77	0.50288		12	0.129831	77	0.450319
13	0.429064	78	0.478058		13	0.118143	78	0.424777
14	0.480583	79	0.455364		14	0.106364	79	0.401509
15	0.601516	80	0.434551		15	0.107069	80	0.380261
16	0.571554	81	0.415405		16	0.190885	81	0.360809
17	0.580576	82	0.397744		17	0.272795	82	0.342957
18	0.612584	83	0.381408		18	0.350248	83	0.326533
19	0.651968	84	0.36626		19	0.416962	84	0.311389
20	0.725217	85	0.352181		20	0.430329	85	0.297392
21	0.67561	86	0.339066		21	0.546616	86	0.284428
22	0.686184	87	0.326822		22	0.555014	87	0.272395
23	0.72244	88	0.31537		23	0.666869	88	0.261204
24	0.770616	89	0.304636		24	0.562245	89	0.250775
25	0.747698	90	0.294559		25	0.653191	90	0.241039
26	0.690426	91	0.285081		26	0.683567	91	0.231934
27	0.622328	92	0.276153		27	0.70392	92	0.223403
28	0.590779	93	0.267729		28	0.690276	93	0.215399
29	0.616965	94	0.259769		29	0.755118	94	0.207877
30	0.650907	95	0.252238		30	0.751414	95	0.200797
31	0.662559	96	0.245102		31	0.832829	96	0.194123
32	0.736572	97	0.238333		32	0.787144	97	0.187825
33	0.761507	98	0.231903		33	0.814611	98	0.181872
34	0.673663	99	0.225788		34	0.888894	99	0.176239
35	0.61217	100	0.219967		35	0.859706	100	0.170902
36	0.723321	101	0.214419		36	0.86714	101	0.165841
37	0.726885	102	0.209126		37	0.850782	102	0.161034
38	0.783037	103	0.204071		38	0.841508	103	0.156465
39	0.831481	104	0.19924		39	0.844455	104	0.152117
40	0.809169	105	0.194617		40	0.786768	105	0.147975
41	0.817644	106	0.190191		41	0.833095	106	0.144027
42	0.920591	107	0.185949		42	0.832869	107	0.140258
43	0.87376	108	0.181881		43	0.834345	108	0.136659
44	0.832653	109	0.177975		44	0.825435	109	0.133218
45	0.89039	110	0.174223		45	0.78626	110	0.129926
46	0.898889	111	0.170617		46	0.809183	111	0.126774
47	0.888069	112	0.167147		47	0.831377	112	0.123753
48	0.889081	113	0.163807		48	0.831929	113	0.120856
49	0.886409	114	0.16059		49	0.851942	114	0.118076
50	0.817155	115	0.157489		50	0.821877	115	0.115406
51	0.753567	116	0.154498		51	0.84583	116	0.11284
52	0.656367	117	0.151611		52	0.90944	117	0.110373
53	0.645832	118	0.148824		53	0.858755	118	0.107999
54	0.678558	119	0.146132		54	0.918667	119	0.105713
55	0.704839	120	0.143529		55	0.898793	120	0.103511
56	0.747004	121	0.141012		56	0.882756	121	0.101388
57	0.579614	122	0.138576		57	0.944809	122	0.0993408
58	0.593955	123	0.136217		58	0.874028	123	0.0973649
59	0.634145	124	0.133933		59	0.85284	124	0.0954572
60	0.678403	125	0.13172		60	0.855522	125	0.0936143
61	0.619541	126	0.129574		61	0.925815	126	0.0918331
62	0.679847	127	0.127493		62	0.924814	127	0.0901107
63	0.724873	128	0.125473		63	0.960541	128	0.0884444
64	0.629052	129	0.123513		64	0.957184	129	0.0868316
65	0.654976	130	0.121609		65	1	130	0.0852699
66	0.78717	131	0.11976		66	0.977898	131	0.0837571
67	1	132	0.117963		67	0.932265	132	0.0822909
68	0.96121	133	0.116215		68	0.86535	133	0.0808694
69	0.946762	134	0.114516		69	0.800416	134	0.0794906
70	0.932353	135	0.112863		70	0.788431	135	0.0781527
71	0.848595	136	0.111253		71	0.694636	136	0.0768541
72	0.755931	137	0.109687		72	0.576321	137	0.075593
73	0.724221	138	0.108161		73	0.592012	138	0.074368
74	0.606363	139	0.106675		74	0.609601	139	0.0731777
75	0.546464	140	0.105226		75	0.57497	140	0.0720205
76	0.589434	141	0.103814		76	0.468296	141	0.0708953
77	0.554416	142	0.102438		77	0.44052	142	0.0698007
78	0.406596	143	0.101095		78	0.334026	143	0.0687357
79	0.457014	144	0.0997845		79	0.293462	144	0.067699
80	0.449496	145	0.0985058		80	0.287293	145	0.0666896
81	0.450177	146	0.0972575		81	0.234133	146	0.0657065
82	0.414138	147	0.0960386		82	0.299398	147	0.0647487
83	0.449289	148	0.0948481		83	0.350273	148	0.0638154
84	0.467183	149	0.0936851		84	0.268755	149	0.0629055
85	0.434699	NaN	NaN		85	0.318827	NaN	NaN
86	0.402441	NaN	NaN		86	0.309417	NaN	NaN
87	0.362475	NaN	NaN		87	0.236499	NaN	NaN
88	0.344396	NaN	NaN		88	0.233199	NaN	NaN
89	0.342122	NaN	NaN		89	0.229293	NaN	NaN
90	0.321986	NaN	NaN		90	0.0934018	NaN	NaN
91	0.3277	NaN	NaN		91	0.0736757	NaN	NaN
92	0.364015	NaN	NaN		92	0.0934476	NaN	NaN
93	0.331873	NaN	NaN		93	0.28186	NaN	NaN
94	0.311721	NaN	NaN		94	0.0958144	NaN	NaN
95	0.320177	NaN	NaN		95	0.111035	NaN	NaN
96	0.286338	NaN	NaN		96	0.0975401	NaN	NaN
97	0.269437	NaN	NaN		97	0.189376	NaN	NaN
98	0.284694	NaN	NaN		98	0.30862	NaN	NaN
99	0.206248	NaN	NaN		99	0.367305	NaN	NaN
100	0.248292	NaN	NaN		100	0.288825	NaN	NaN
101	0.215017	NaN	NaN		101	0.257316	NaN	NaN
102	0.184475	NaN	NaN		102	0.287743	NaN	NaN
103	0.158653	NaN	NaN		103	0.22914	NaN	NaN
104	0.172565	NaN	NaN		104	0.115094	NaN	NaN
105	0.167263	NaN	NaN		105	0.0924876	NaN	NaN
106	0.209739	NaN	NaN		106	0.155487	NaN	NaN
107	0.208592	NaN	NaN		107	0.132572	NaN	NaN
108	0.218253	NaN	NaN		108	0.198168	NaN	NaN
109	0.184905	NaN	NaN		109	0.243957	NaN	NaN
110	0.171401	NaN	NaN		110	0.305792	NaN	NaN
111	0.15082	NaN	NaN		111	0.220604	NaN	NaN
112	0.177971	NaN	NaN		112	0.22737	NaN	NaN
113	0.140566	NaN	NaN		113	0.119921	NaN	NaN
114	0.138924	NaN	NaN		114	0.155447	NaN	NaN
115	0.177849	NaN	NaN		115	0.16868	NaN	NaN
116	0.186049	NaN	NaN		116	0.231586	NaN	NaN
117	0.132846	NaN	NaN		117	0.170876	NaN	NaN
118	0.163276	NaN	NaN		118	0.211521	NaN	NaN
119	0.124166	NaN	NaN		119	0.156141	NaN	NaN
120	0.162652	NaN	NaN		120	0.0711069	NaN	NaN
121	0.105206	NaN	NaN		121	0.109502	NaN	NaN
122	0.121369	NaN	NaN		122	0.095771	NaN	NaN
123	0.147425	NaN	NaN		123	-0.0251677	NaN	NaN
124	0.135098	NaN	NaN		124	0.0571559	NaN	NaN
125	0.100497	NaN	NaN		125	0.043792	NaN	NaN
126	0.14	NaN	NaN		126	0.0686901	NaN	NaN
127	0.138566	NaN	NaN		127	0.125483	NaN	NaN
128	0.129756	NaN	NaN		128	0.0935699	NaN	NaN
129	0.0852415	NaN	NaN		129	0.105876	NaN	NaN
130	0.0699374	NaN	NaN		130	0.123165	NaN	NaN
131	0.0953638	NaN	NaN		131	0.07078	NaN	NaN
132	0.0921264	NaN	NaN		132	0.123003	NaN	NaN
133	0.100397	NaN	NaN		133	0.018073	NaN	NaN
134	0.0760731	NaN	NaN		134	0.0893559	NaN	NaN
135	0.076098	NaN	NaN		135	0.0944164	NaN	NaN
136	0.104557	NaN	NaN		136	0.0721943	NaN	NaN
137	0.091739	NaN	NaN		137	0.0248235	NaN	NaN
138	0.0868349	NaN	NaN		138	0.0870477	NaN	NaN
139	0.108627	NaN	NaN		139	0.00508154	NaN	NaN
140	0.113708	NaN	NaN		140	-0.0186241	NaN	NaN
141	0.0885571	NaN	NaN		141	-0.0301427	NaN	NaN
142	0.0585773	NaN	NaN		142	0.0206831	NaN	NaN
143	0.0877612	NaN	NaN		143	-0.0584468	NaN	NaN
144	0.077905	NaN	NaN		144	0.0065787	NaN	NaN
145	0.0971685	NaN	NaN		145	0.104548	NaN	NaN
146	0.0832466	NaN	NaN		146	0.0930908	NaN	NaN
147	0.0774007	NaN	NaN		147	0.088131	NaN	NaN
148	0.0758242	NaN	NaN		148	0.110517	NaN	NaN
149	0.0297971	NaN	NaN		149	0.0673997	NaN	NaN
150	0.0519373	NaN	NaN		150	0.083778	NaN	NaN
151	0.0385196	NaN	NaN		151	-0.0227437	NaN	NaN
152	0.0701682	NaN	NaN		152	0.0375898	NaN	NaN
153	0.0317576	NaN	NaN		153	0.130876	NaN	NaN
154	0.0615165	NaN	NaN		154	0.0888235	NaN	NaN
155	0.0889741	NaN	NaN		155	0.00793976	NaN	NaN
156	0.0700953	NaN	NaN		156	-0.00888985	NaN	NaN
157	0.029431	NaN	NaN		157	-0.0182885	NaN	NaN
158	0.0454573	NaN	NaN		158	0.00941607	NaN	NaN
159	0.0230032	NaN	NaN		159	0.0470817	NaN	NaN
160	0.0447829	NaN	NaN		160	0.0495918	NaN	NaN
161	0.0776314	NaN	NaN		161	0.089165	NaN	NaN
162	0.0747313	NaN	NaN		162	0.0394509	NaN	NaN
163	0.0965762	NaN	NaN		163	-0.00930839	NaN	NaN
164	0.07376	NaN	NaN		164	0.0557053	NaN	NaN
165	0.0738094	NaN	NaN		165	-0.0715528	NaN	NaN
166	0.0464179	NaN	NaN		166	-0.0439323	NaN	NaN
167	0.0552608	NaN	NaN		167	-0.0956516	NaN	NaN
168	0.0635029	NaN	NaN		168	0.00557317	NaN	NaN
169	0.0492442	NaN	NaN		169	0.00988922	NaN	NaN
170	0.049256	NaN	NaN		170	0.150615	NaN	NaN
171	0.0768914	NaN	NaN		171	0.11541	NaN	NaN
172	0.0901992	NaN	NaN		172	0.137625	NaN	NaN
173	0.0386941	NaN	NaN		173	0.0745724	NaN	NaN
174	0.0230455	NaN	NaN		174	0.0480944	NaN	NaN
175	0.0284034	NaN	NaN		175	-0.0212016	NaN	NaN
176	0.049508	NaN	NaN		176	0.0386297	NaN	NaN
177	0.0515298	NaN	NaN		177	-0.0867978	NaN	NaN
178	0.00111687	NaN	NaN		178	-0.0633304	NaN	NaN
179	0.0211565	NaN	NaN		179	0.0223623	NaN	NaN
180	0.0173025	NaN	NaN		180	-0.0170405	NaN	NaN
181	0.00272273	NaN	NaN		181	0.0418259	NaN	NaN
182	0.00692948	NaN	NaN		182	0.0423852	NaN	NaN
183	0.0202093	NaN	NaN		183	0.0203134	NaN	NaN
184	0.0473805	NaN	NaN		184	-0.00101201	NaN	NaN
185	0.0240548	NaN	NaN		185	0.0101435	NaN	NaN
186	0.0285133	NaN	NaN		186	-0.00197437	NaN	NaN
187	-0.00948029	NaN	NaN		187	-0.00969592	NaN	NaN
188	0.0148768	NaN	NaN		188	0.00329016	NaN	NaN
189	0.0145103	NaN	NaN		189	0.0516614	NaN	NaN
190	0.0492483	NaN	NaN		190	0.0119546	NaN	NaN
191	0.0224385	NaN	NaN		191	0.072042	NaN	NaN
192	0.00273172	NaN	NaN		192	0.0803198	NaN	NaN
193	0.0289946	NaN	NaN		193	0.0291217	NaN	NaN
194	0.0314927	NaN	NaN		194	0.0752651	NaN	NaN
195	0.0147849	NaN	NaN		195	0.0244334	NaN	NaN
196	0.0139115	NaN	NaN		196	0.011035	NaN	NaN
197	0.0367104	NaN	NaN		197	0.0205408	NaN	NaN
198	0.0330763	NaN	NaN		198	0.0271412	NaN	NaN
199	0.0107678	NaN	NaN		199	0.0196804	NaN	NaN
200	0.0142222	NaN	NaN		200	0.042225	NaN	NaN
201	0.00877328	NaN	NaN		201	0.047111	NaN	NaN
202	-0.0376166	NaN	NaN		202	-0.0197772	NaN	NaN
203	0.0258582	NaN	NaN		203	0.00831944	NaN	NaN
204	0.00463186	NaN	NaN		204	0.0383342	NaN	NaN
205	0.0139468	NaN	NaN		205	0.0244093	NaN	NaN
206	0.0141634	NaN	NaN		206	-0.0224845	NaN	NaN
207	-0.0074454	NaN	NaN		207	-0.0359505	NaN	NaN
208	0.00521834	NaN	NaN		208	-0.0419121	NaN	NaN
209	-0.00636154	NaN	NaN		209	-0.0825844	NaN	NaN
210	-0.00646975	NaN	NaN		210	-0.0458034	NaN	NaN
211	0.0223625	NaN	NaN		211	-0.0754468	NaN	NaN
212	0.0131157	NaN	NaN		212	-0.0567006	NaN	NaN
213	0.0181264	NaN	NaN		213	-0.108811	NaN	NaN
214	0.0600789	NaN	NaN		214	-0.0925874	NaN	NaN
215	0.0277483	NaN	NaN		215	-0.103965	NaN	NaN
216	-0.0153988	NaN	NaN		216	-0.0852612	NaN	NaN
217	0.0264862	NaN	NaN		217	-0.143499	NaN	NaN
218	0.00947556	NaN	NaN		218	-0.114952	NaN	NaN
219	0.00309115	NaN	NaN		219	-0.0832117	NaN	NaN
220	0.021087	NaN	NaN		220	-0.164195	NaN	NaN
221	0.0192395	NaN	NaN		221	-0.139363	NaN	NaN
222	0.0455583	NaN	NaN		222	-0.113754	NaN	NaN
223	0.00753199	NaN	NaN		223	-0.109731	NaN	NaN
224	0.00583711	NaN	NaN		224	-0.113517	NaN	NaN
225	0.0341496	NaN	NaN		225	-0.101198	NaN	NaN
226	-0.00940313	NaN	NaN		226	-0.0899089	NaN	NaN
227	-0.0413459	NaN	NaN		227	-0.0861619	NaN	NaN
228	-0.0361611	NaN	NaN		228	-0.114287	NaN	NaN
229	-0.0169958	NaN	NaN		229	-0.0283953	NaN	NaN
230	-0.015762	NaN	NaN		230	-0.0545505	NaN	NaN
231	0.00473967	NaN	NaN		231	-0.0466311	NaN	NaN
232	-0.0469485	NaN	NaN		232	0.0591051	NaN	NaN
233	-0.0472447	NaN	NaN		233	-0.02236	NaN	NaN
234	-0.0110214	NaN	NaN		234	-0.00921476	NaN	NaN
235	-0.025094	NaN	NaN		235	0.0120679	NaN	NaN
236	-0.0252349	NaN	NaN		236	-0.0282469	NaN	NaN
237	-0.0148196	NaN	NaN		237	-0.0289934	NaN	NaN
238	0.00708307	NaN	NaN		238	-0.0307425	NaN	NaN
239	-0.0137567	NaN	NaN		239	-0.081528	NaN	NaN

## Sheet: Supplement 2F
time (min)	EGFRp	time fit	fit EGFRp		time (min)	EGFRp	time fit	fit EGFRp
1	0.0510007	65	0.56427		1	-0.016186	65	0.664654
2	0.0841176	66	0.56427		2	0.00329331	66	0.664654
3	0.0158182	67	0.564268		3	0.0663503	67	0.664654
4	-0.0913614	68	0.56426		4	-0.0397946	68	0.664654
5	-0.0595752	69	0.564236		5	-0.013663	69	0.664654
6	0.17846	70	0.564184		6	0.0575244	70	0.664654
7	0.402581	71	0.564089		7	-0.0443663	71	0.664654
8	0.576223	72	0.563928		8	0.0562187	72	0.664654
9	0.714583	73	0.563677		9	0.256832	73	0.664654
10	0.74781	74	0.563308		10	0.298758	74	0.664654
11	0.819788	75	0.562786		11	0.299229	75	0.664654
12	0.743383	76	0.562075		12	0.25622	76	0.664654
13	0.790139	77	0.561134		13	0.289585	77	0.664654
14	0.807349	78	0.559918		14	0.139548	78	0.664654
15	0.918788	79	0.55838		15	0.189622	79	0.664654
16	0.925227	80	0.55647		16	0.152014	80	0.664654
17	0.888531	81	0.554136		17	0.235706	81	0.664654
18	0.905592	82	0.551326		18	0.359436	82	0.664654
19	1	83	0.547987		19	0.445927	83	0.664654
20	0.99637	84	0.544069		20	0.506802	84	0.664654
21	0.957687	85	0.539523		21	0.473773	85	0.664654
22	0.960357	86	0.534305		22	0.416231	86	0.664654
23	0.942905	87	0.528376		23	0.629964	87	0.664654
24	0.820583	88	0.521704		24	0.499631	88	0.664654
25	0.904882	89	0.514268		25	0.639935	89	0.664654
26	0.856205	90	0.506053		26	0.562015	90	0.664654
27	0.836589	91	0.497057		27	0.597148	91	0.664654
28	0.86567	92	0.48729		28	0.728772	92	0.664654
29	0.836326	93	0.476775		29	0.666656	93	0.664654
30	0.807735	94	0.465544		30	0.666051	94	0.664654
31	0.722041	95	0.453644		31	0.596281	95	0.664654
32	0.768385	96	0.441132		32	0.60944	96	0.664654
33	0.791703	97	0.428075		33	0.699703	97	0.664654
34	0.788836	98	0.414548		34	0.686342	98	0.664654
35	0.816873	99	0.400632		35	0.818797	99	0.664654
36	0.72527	100	0.386414		36	0.873015	100	0.664654
37	0.742735	101	0.371982		37	0.680476	101	0.664654
38	0.698816	102	0.357424		38	0.91076	102	0.664654
39	0.735201	103	0.342826		39	0.815956	103	0.664654
40	0.623184	104	0.328272		40	0.83346	104	0.664654
41	0.655568	105	0.313838		41	0.814073	105	0.664654
42	0.687251	106	0.299596		42	0.882913	106	0.664654
43	0.739495	107	0.28561		43	0.924165	107	0.664653
44	0.717826	108	0.271936		44	0.930251	108	0.664653
45	0.754588	109	0.258623		45	1	109	0.664652
46	0.680444	110	0.245709		46	0.879925	110	0.664652
47	0.65415	111	0.233227		47	0.994203	111	0.664651
48	0.636249	112	0.221201		48	0.95326	112	0.664649
49	0.610154	113	0.209649		49	0.964731	113	0.664648
50	0.532486	114	0.198582		50	0.952142	114	0.664645
51	0.542473	115	0.188004		51	0.963266	115	0.664642
52	0.516019	116	0.177917		52	0.9444	116	0.664639
53	0.500164	117	0.168316		53	0.976448	117	0.664634
54	0.56009	118	0.159195		54	0.988435	118	0.664627
55	0.563864	119	0.150542		55	0.971709	119	0.664619
56	0.603014	120	0.142344		56	0.930523	120	0.664609
57	0.641702	121	0.134587		57	0.91217	121	0.664596
58	0.581138	122	0.127256		58	0.965273	122	0.66458
59	0.571307	123	0.120332		59	0.994053	123	0.664559
60	0.591503	124	0.113797		60	0.974559	124	0.664533
61	0.608371	125	0.107635		61	0.939124	125	0.664501
62	0.658674	126	0.101827		62	0.914374	126	0.664461
63	0.637473	127	0.0963545		63	0.867086	127	0.664412
64	0.652071	128	0.0912001		64	0.912543	128	0.664352
65	0.650819	129	0.0863465		65	0.915792	129	0.664277
66	0.607558	130	0.0817769		66	0.936019	130	0.664186
67	0.586352	131	0.0774752		67	0.861822	131	0.664075
68	0.599935	132	0.0734257		68	0.945725	132	0.663939
69	0.617016	133	0.0696137		69	0.971717	133	0.663775
70	0.618988	134	0.0660249		70	0.93301	134	0.663577
71	0.577667	135	0.0626459		71	0.909769	135	0.663338
72	0.600366	136	0.059464		72	0.909688	136	0.66305
73	0.579062	137	0.056467		73	0.859079	137	0.662705
74	0.573934	138	0.0536436		74	0.828375	138	0.662292
75	0.571315	139	0.050983		75	0.858903	139	0.6618
76	0.519304	NaN	NaN		76	0.757166	140	0.661214
77	0.545899	NaN	NaN		77	0.784379	141	0.660519
78	0.496649	NaN	NaN		78	0.774423	142	0.659698
79	0.538519	NaN	NaN		79	0.804888	143	0.658728
80	0.56504	NaN	NaN		80	0.835366	144	0.657586
81	0.511894	NaN	NaN		81	0.832272	145	0.656246
82	0.522269	NaN	NaN		82	0.795146	146	0.654676
83	0.539019	NaN	NaN		83	0.781979	147	0.652845
84	0.498243	NaN	NaN		84	0.751032	148	0.650712
85	0.521351	NaN	NaN		85	0.731547	149	0.648237
86	0.481165	NaN	NaN		86	0.736767	150	0.645372
87	0.465776	NaN	NaN		87	0.720389	151	0.642067
88	0.489414	NaN	NaN		88	0.723757	152	0.638266
89	0.467919	NaN	NaN		89	0.6728	153	0.633911
90	0.46887	NaN	NaN		90	0.705643	154	0.628939
91	0.432485	NaN	NaN		91	0.726255	155	0.623283
92	0.466713	NaN	NaN		92	0.655603	156	0.616876
93	0.489246	NaN	NaN		93	0.596194	157	0.60965
94	0.440568	NaN	NaN		94	0.594835	158	0.601537
95	0.452706	NaN	NaN		95	0.646298	159	0.592474
96	0.480882	NaN	NaN		96	0.683466	160	0.582401
97	0.471876	NaN	NaN		97	0.715735	161	0.571269
98	0.499117	NaN	NaN		98	0.633219	162	0.559038
99	0.464893	NaN	NaN		99	0.604781	163	0.545685
100	0.470214	NaN	NaN		100	0.587629	164	0.531202
101	0.411348	NaN	NaN		101	0.531895	165	0.515603
102	0.393534	NaN	NaN		102	0.697882	166	0.498923
103	0.383531	NaN	NaN		103	0.607504	167	0.481224
104	0.300868	NaN	NaN		104	0.659412	168	0.46259
105	0.254534	NaN	NaN		105	0.666075	169	0.443129
106	0.302743	NaN	NaN		106	0.669731	170	0.422973
107	0.280182	NaN	NaN		107	0.618728	171	0.402271
108	0.274963	NaN	NaN		108	0.646016	172	0.381186
109	0.255025	NaN	NaN		109	0.610188	173	0.359893
110	0.240917	NaN	NaN		110	0.60651	174	0.338569
111	0.220111	NaN	NaN		111	0.639428	175	0.317388
112	0.20031	NaN	NaN		112	0.66691	176	0.296518
113	0.152736	NaN	NaN		113	0.675608	177	0.276112
114	0.144801	NaN	NaN		114	0.656505	178	0.256309
115	0.15677	NaN	NaN		115	0.667182	179	0.237227
116	0.173896	NaN	NaN		116	0.545771	180	0.218961
117	0.198454	NaN	NaN		117	0.62313	181	0.201588
118	0.122686	NaN	NaN		118	0.641355	182	0.185159
119	0.0885076	NaN	NaN		119	0.616301	183	0.169708
120	0.106926	NaN	NaN		120	0.682605	184	0.155249
121	0.162248	NaN	NaN		121	0.605786	185	0.141778
122	0.119518	NaN	NaN		122	0.599322	186	0.129281
123	0.147721	NaN	NaN		123	0.536559	187	0.11773
124	0.0921951	NaN	NaN		124	0.488925	188	0.10709
125	0.0858711	NaN	NaN		125	0.510767	189	0.0973162
126	0.133291	NaN	NaN		126	0.500546	190	0.088363
127	0.211155	NaN	NaN		127	0.495714	191	0.0801802
128	0.0908903	NaN	NaN		128	0.454832	192	0.0727166
129	0.111051	NaN	NaN		129	0.623087	193	0.0659209
130	0.134985	NaN	NaN		130	0.516545	194	0.0597425
131	0.142384	NaN	NaN		131	0.482491	195	0.0541326
132	0.0521213	NaN	NaN		132	0.541517	196	0.0490443
133	0.0495605	NaN	NaN		133	0.366216	197	0.0444332
134	0.0715566	NaN	NaN		134	0.390247	198	0.0402577
135	0.0715251	NaN	NaN		135	0.456095	199	0.0364787
136	0.0653283	NaN	NaN		136	0.492862	200	0.03306
137	0.0247273	NaN	NaN		137	0.519396	201	0.0299685
138	0.0508717	NaN	NaN		138	0.440635	202	0.0271732
139	-0.0360281	NaN	NaN		139	0.460992	203	0.0246462
140	0.0205987	NaN	NaN		140	0.521513	204	0.0223618
141	0.0107911	NaN	NaN		141	0.862492	205	0.0202967
142	0.0348103	NaN	NaN		142	0.645417	206	0.0184296
143	-0.00800072	NaN	NaN		143	0.75051	NaN	NaN
144	0.107214	NaN	NaN		144	0.70634	NaN	NaN
145	0.0113989	NaN	NaN		145	0.767826	NaN	NaN
146	0.0107501	NaN	NaN		146	0.816243	NaN	NaN
147	0.0418345	NaN	NaN		147	0.673887	NaN	NaN
148	0.075169	NaN	NaN		148	0.744124	NaN	NaN
149	0.0559416	NaN	NaN		149	0.68845	NaN	NaN
150	0.212508	NaN	NaN		150	0.549762	NaN	NaN
151	0.233188	NaN	NaN		151	0.471172	NaN	NaN
152	0.186863	NaN	NaN		152	0.631228	NaN	NaN
153	0.150989	NaN	NaN		153	0.644155	NaN	NaN
154	0.151123	NaN	NaN		154	0.505177	NaN	NaN
155	0.121915	NaN	NaN		155	0.594424	NaN	NaN
156	0.165117	NaN	NaN		156	0.617889	NaN	NaN
157	0.066078	NaN	NaN		157	0.560353	NaN	NaN
158	0.129035	NaN	NaN		158	0.528093	NaN	NaN
159	0.137226	NaN	NaN		159	0.515144	NaN	NaN
160	0.202164	NaN	NaN		160	0.436685	NaN	NaN
161	0.0900546	NaN	NaN		161	0.655634	NaN	NaN
162	0.137568	NaN	NaN		162	0.467428	NaN	NaN
163	0.13711	NaN	NaN		163	0.501125	NaN	NaN
164	0.205017	NaN	NaN		164	0.445537	NaN	NaN
165	0.212405	NaN	NaN		165	0.303847	NaN	NaN
166	0.213607	NaN	NaN		166	0.339894	NaN	NaN
167	0.242095	NaN	NaN		167	0.401422	NaN	NaN
168	0.217953	NaN	NaN		168	0.439255	NaN	NaN
169	0.20207	NaN	NaN		169	0.526075	NaN	NaN
170	0.170693	NaN	NaN		170	0.541784	NaN	NaN
171	0.232913	NaN	NaN		171	0.493522	NaN	NaN
172	0.207744	NaN	NaN		172	0.418887	NaN	NaN
173	0.240669	NaN	NaN		173	0.373568	NaN	NaN
174	0.266706	NaN	NaN		174	0.406304	NaN	NaN
175	0.198848	NaN	NaN		175	0.419156	NaN	NaN
176	0.217005	NaN	NaN		176	0.308558	NaN	NaN
177	0.126118	NaN	NaN		177	0.35298	NaN	NaN
178	0.267677	NaN	NaN		178	0.341803	NaN	NaN
179	0.10587	NaN	NaN		179	0.374261	NaN	NaN
180	0.20286	NaN	NaN		180	0.479825	NaN	NaN
181	0.247844	NaN	NaN		181	0.312201	NaN	NaN
182	0.236615	NaN	NaN		182	0.238332	NaN	NaN
183	0.309048	NaN	NaN		183	0.245387	NaN	NaN
184	0.229686	NaN	NaN		184	0.121845	NaN	NaN
185	0.22223	NaN	NaN		185	0.0598592	NaN	NaN
186	0.219808	NaN	NaN		186	0.0531818	NaN	NaN
187	0.211707	NaN	NaN		187	0.0680703	NaN	NaN
188	0.214511	NaN	NaN		188	0.0384391	NaN	NaN
189	0.225298	NaN	NaN		189	0.0700886	NaN	NaN
190	0.200267	NaN	NaN		190	0.0634213	NaN	NaN
191	0.154946	NaN	NaN		191	0.0238274	NaN	NaN
192	0.130201	NaN	NaN		192	-0.0256098	NaN	NaN
193	0.261174	NaN	NaN		193	0.0196971	NaN	NaN
194	0.223796	NaN	NaN		194	-0.158353	NaN	NaN
195	0.247719	NaN	NaN		195	-0.0586536	NaN	NaN
196	0.240745	NaN	NaN		196	-0.0814483	NaN	NaN
197	0.228437	NaN	NaN		197	0.049064	NaN	NaN
198	0.271668	NaN	NaN		198	-0.0476329	NaN	NaN
199	0.172471	NaN	NaN		199	-0.0864964	NaN	NaN
200	0.198175	NaN	NaN		200	-0.0382456	NaN	NaN
201	0.164691	NaN	NaN		201	-0.112797	NaN	NaN
202	0.212795	NaN	NaN		202	-0.105231	NaN	NaN
203	0.160712	NaN	NaN		203	-0.072922	NaN	NaN
204	0.193176	NaN	NaN		204	-0.161671	NaN	NaN
205	0.201635	NaN	NaN		205	-0.00965399	NaN	NaN
206	0.233129	NaN	NaN		206	-0.0430901	NaN	NaN
207	0.188234	NaN	NaN		207	-0.114814	NaN	NaN
208	0.179224	NaN	NaN		208	0.034089	NaN	NaN
209	0.304602	NaN	NaN		209	-0.0228597	NaN	NaN
210	0.215746	NaN	NaN		210	-0.185098	NaN	NaN
211	0.198303	NaN	NaN		211	-0.219705	NaN	NaN
212	0.252832	NaN	NaN		212	-0.247536	NaN	NaN
213	0.29446	NaN	NaN		213	-0.234561	NaN	NaN
214	0.197487	NaN	NaN		214	-0.339192	NaN	NaN
215	0.145198	NaN	NaN		215	-0.281988	NaN	NaN
216	0.208434	NaN	NaN		216	-0.245559	NaN	NaN
217	0.187289	NaN	NaN		217	-0.228101	NaN	NaN
218	0.14008	NaN	NaN		218	-0.208739	NaN	NaN
219	0.058038	NaN	NaN		219	-0.15975	NaN	NaN
220	0.120216	NaN	NaN		220	-0.19287	NaN	NaN
221	0.0871609	NaN	NaN		221	-0.110898	NaN	NaN
222	0.199839	NaN	NaN		222	-0.122186	NaN	NaN
223	0.155937	NaN	NaN		223	-0.217866	NaN	NaN
224	0.154024	NaN	NaN		224	0.00304391	NaN	NaN
225	0.178904	NaN	NaN		225	0.0882298	NaN	NaN
226	0.277302	NaN	NaN		226	0.113677	NaN	NaN
227	0.18516	NaN	NaN		227	0.0045155	NaN	NaN
228	0.155504	NaN	NaN		228	0.094937	NaN	NaN
229	0.259461	NaN	NaN		229	0.127353	NaN	NaN
230	0.231063	NaN	NaN		230	0.088417	NaN	NaN
231	0.248248	NaN	NaN		231	0.129156	NaN	NaN
232	0.258606	NaN	NaN		232	0.118999	NaN	NaN
233	0.268336	NaN	NaN		233	0.0485773	NaN	NaN
234	0.297204	NaN	NaN		234	-0.0218439	NaN	NaN
235	0.218295	NaN	NaN		235	-0.00482653	NaN	NaN
236	0.244092	NaN	NaN		236	-0.0505748	NaN	NaN
237	0.220365	NaN	NaN		237	0.0884206	NaN	NaN
238	0.273083	NaN	NaN		238	0.15733	NaN	NaN
239	0.360686	NaN	NaN		239	0.150323	NaN	NaN
240	0.481682	NaN	NaN		240	0.0681759	NaN	NaN

## Sheet: Supplement 2G
Hill coefficient (n)				Half life (min)
w/o Lapatinib	w Lapatinib			w/o Lapatinib	w Lapatinib
3.50057	0.631023			13	5
2.12764	1.12489			27	9
4.12076	1.92952			40	10
0.274185	2.05005			2	10
13.965	1.27856			109	9
2.00518	0.459836			74	3
5.92771	1.26579			92	9
4.60515	1.78499			56	10
2.35989	5.62288			55	10
2.93994				67
4.82532				31
0.554757				20
0.906891				13
1.85758				25
5.56631				20
2.04391				29
6.08157				20
1.51174				24
8.23926				53
2.83327				48

## Sheet: Supplement 2H
Timepoints	Directed protrusive area
0	0.017039
1	0.0220637
2	0.0309599
3	0.0420353
4	0.053386
5	0.0626947
6	0.0676186
7	0.0670249
8	0.0612101
9	0.0510063
10	0.0380296
11	0.0254461
12	0.0167041
13	0.0132805
14	0.0141589
15	0.0169765
16	0.019314
17	0.0199586
18	0.0198981
19	0.0216824
20	0.0270552
21	0.0354708
22	0.0451387
23	0.0544333
24	0.0614601
25	0.0637505
26	0.0603816
27	0.0538745
28	0.0487836
29	0.048698
30	0.0542624
31	0.062483
32	0.068131
33	0.0675866
34	0.0616827
35	0.0549146
36	0.0526966
37	0.0591387
38	0.0756532
39	0.100465
40	0.128587
41	0.152084
42	0.162316
43	0.155266
44	0.136211
45	0.117231
46	0.108299
47	0.111837
48	0.125736
49	0.147137
50	0.171723
51	0.193418
52	0.20647
53	0.205603
54	0.186395
55	0.150442
56	0.10834
57	0.0732528
58	0.0523989
59	0.0458826
60	0.0502153
61	0.0606874
62	0.0732087
63	0.0862921
64	0.0997794
65	0.110721
66	0.114171
67	0.110255
68	0.106514
69	0.10948
70	0.11675
71	0.121043
72	0.119297
73	0.113617
74	0.105338
75	0.0930605
76	0.077004
77	0.0619593
78	0.0539867
79	0.0550124
80	0.0613985
81	0.0670277
82	0.0675877
83	0.0623831
84	0.0531605
85	0.0426169
86	0.0336394
87	0.0284223
88	0.0278125
89	0.0312693
90	0.0362382
91	0.0380582
92	0.03319
93	0.0237165
94	0.016405
95	0.0156651
96	0.0189825
97	0.0205302
98	0.0175609
99	0.01196
100	0.00707326
101	0.00473917
102	0.00487212
103	0.00639143
104	0.0078803
105	0.00802159
106	0.00630769
107	0.00339332
108	0.000597761
109	-0.000940967
110	-0.000968785
111	-0.000307761
112	0.000115104
113	0.00099079
114	0.00486531
115	0.0136113
116	0.0255297
117	0.0360208
118	0.0417028
119	0.0430473
120	0.0425646
121	0.0416349
122	0.0398299
123	0.0363185
124	0.0310219
125	0.0247329
126	0.0189014
127	0.0154802
128	0.0161664
129	0.0209069
130	0.027171
131	0.0314247
132	0.0316253
133	0.0281873
134	0.0229927
135	0.0180415
136	0.0146618
137	0.0130909
138	0.0125002
139	0.0114385
140	0.0084906
141	0.00320943
142	-0.00319982
143	-0.00851932
144	-0.0112339
145	-0.011601
146	-0.0109778
147	-0.0101395
148	-0.00848348
149	-0.00524195
150	-0.00125622
151	0.00113172
152	0.000281928
153	-0.00267239
154	-0.004202
155	-0.00155141
156	0.00408736
157	0.00835308
158	0.00833164
159	0.00568313
160	0.00461399
161	0.00745527
162	0.0127674
163	0.0172052
164	0.0188073
165	0.0186242
166	0.0190695
167	0.0206751
168	0.0211727
169	0.0181565
170	0.0118227
171	0.00468094
172	-0.000732855
173	-0.00345312
174	-0.00393612
175	-0.00295989
176	-0.000880456
177	0.00202752
178	0.00461356
179	0.0048123
180	0.00159712
181	-0.0030075
182	-0.00487994
183	-0.0011331
184	0.00769712
185	0.0184673
186	0.027554
187	0.0323452
188	0.032084
189	0.0281595
190	0.0232327
191	0.0198514
192	0.0193524
193	0.0206651
194	0.0202233
195	0.014694
196	0.0041863
197	-0.00769693
198	-0.0162878
199	-0.0185276
200	-0.0151178
201	-0.0101451
202	-0.0071552
203	-0.00598634
204	-0.00458939
205	-0.00270847
206	-0.00208274
207	-0.00375898
208	-0.00684206
209	-0.00975101
210	-0.0114338
211	-0.011255
212	-0.00863513
213	-0.00343189
214	0.00331413
215	0.00918554
216	0.0116776
217	0.0105671
218	0.00860243
219	0.00886046
220	0.0116844
221	0.0150296
222	0.0172615
223	0.0183086
224	0.0181869
225	0.0159757
226	0.0111942
227	0.0056578
228	0.00290401
229	0.00505867
230	0.0105756
231	0.0156499
232	0.0176492
233	0.0167471
234	0.0146898
235	0.0128457
236	0.0115709
237	0.0107514
238	0.0103248
