# Supplementary material for: Cells use molecular working memory to navigate in changing chemoattractant fields
Source: eLife. 2022 Jun 6;11:e76825. doi: 10.7554/eLife.76825 (PMC9282860; doi:10.7554/eLife.76825)
Supplement: Figure 2—source data 1. [file elife-76825-fig2-data1.xlsx]

## Sheet: 2B
	60 - 1 (*10)	60 - 2(*10)	60 - 3(*10)	60 - 4(*10)			65- 1(*10)	65 - 2(*10)	65 - 3(*10)	65 - 4(*10)
0	0.787402	0.831442	0.986634	0.460687		0	0.0389105	0	0.0473153	0.022827
1	0.826772	1.20097	0.735491	0.604651		1	0	0.0291188	0.0236577	0.0684811
2	1.53543	0.769854	1.21984	0.777409		2	0	0.0291188	0.0118288	0.0684811
3	0.787402	0.554295	0.663735	0.719823		3	0.0389105	0.0873563	0.0236577	0.022827
4	0.629921	0.954619	1.02251	1.06534		4	0.077821	0	0.0354865	0
5	1.14173	0.431118	1.05839	0.719823		5	0	0.0291188	0.0473153	0.022827
6	1.22047	0.769854	0.520225	1.35327		6	0.0389105	0.0291188	0	0.022827
7	0.826772	0.554295	0.59198	0.460687		7	0	0	0.0236577	0.0456541
8	0.787402	0.554295	1.02251	0.777409		8	0	0	0	0.022827
9	0.708661	0.554295	0.771368	1.29568		9	0.077821	0.0582375	0.0591441	0.0913082
10	1.14173	0.615883	0.914879	0.719823		10	0.077821	0.0291188	0.0236577	0.0684811
11	1.22047	0.769854	0.914879	0.950166		11	0	0.0873563	0	0.0456541
12	1.14173	0.831442	0.914879	1.35327		12	0.077821	0.0582375	0.0473153	0
13	0.905512	1.0778	0.735491	0.777409		13	0.0389105	0.0873563	0.0118288	0.022827
14	1.22047	0.646677	0.986634	0.403101		14	0	0.0291188	0.0236577	0.022827
15	0.629921	0.492707	0.879001	0.575858		15	0.116732	0.0582375	0.0354865	0.0456541
16	1.29921	0.893031	0.556103	0.604651		16	0.0389105	0	0.0354865	0.022827
17	0.905512	0.646677	0.771368	1.06534		17	0.0389105	0.145594	0.0354865	0.0913082
18	0.393701	0.831442	0.950756	0.604651		18	0	0.0582375	0.0473153	0.0684811
19	0.708661	0.893031	0.520225	0.403101		19	0.116732	0	0.0236577	0.0684811
20	1.45669	0.492707	0.914879	0.950166		20	0.077821	0.0291188	0.0354865	0.022827
21	0.826772	0.184765	0.627858	1.35327		21	0.0389105	0.0582375	0.0236577	0.114135
22	0.984252	0.615883	0.986634	0.950166		22	0.0389105	0	0	0.022827
23	0.472441	0.554295	1.11221	0.662237		23	0	0	0	0
24	0.472441	0.615883	0.699613	0.950166		24	0	0.0291188	0.0118288	0.022827
25	0.826772	1.0778	0.59198	1.29568		25	0.194553	0.0291188	0.0473153	0.022827
26	0.826772	0.708266	0.699613	1.2381		26	0.0389105	0.0873563	0.0236577	0.022827
27	0.551181	1.01621	0.843123	0.662237		27	0.0389105	0.0291188	0.0473153	0.022827
28	0.629921	1.38574	0.520225	0.604651		28	0.0389105	0.0291188	0.0236577	0.0456541
29	0.905512	0.431118	0.950756	0.834994		29	0.0389105	0.0873563	0.0354865	0.022827
30	0.826772	0.708266	0.914879	0.777409		30	0.0389105	0	0.0236577	0
31	1.29921	0.769854	1.02251	1.00775		31	0.0389105	0.0291188	0.0354865	0.0913082
32	0.708661	0.646677	0.322898	0.575858		32	0	0	0.0354865	0.022827
33	0.472441	0.954619	0.520225	1.00775		33	0.0389105	0.0291188	0.0118288	0.0456541
34	1.14173	0.954619	0.556103	0.950166		34	0	0	0.0236577	0.0456541
35	0.708661	0.708266	0.879001	0.89258		35	0	0	0	0.022827
36	0.826772	0.615883	0.950756	0.518272		36	0.194553	0.0582375	0.0473153	0.022827
37	0.905512	0.615883	1.02251	1.41085		37	0.116732	0.116475	0.0473153	0.0456541
38	0.23622	0.431118	1.02251	1.46844		38	0	0	0.0236577	0
39	1.06299	0.554295	0.950756	1.35327		39	0.0389105	0.203831	0.0118288	0.022827
40	1.06299	0.893031	0.771368	0.89258		40	0.0389105	0	0.0591441	0.0684811
41	1.37795	0.769854	0.879001	0.662237		41	0	0.0291188	0.0354865	0.0456541
42	0.905512	0.893031	0.663735	1.06534		42	0	0.0291188	0.0354865	0.022827
43	0.551181	0.769854	0.735491	0.777409		43	0.116732	0	0.0354865	0.022827
44	0.826772	0.307942	0.699613	0.89258		44	0.0389105	0.0873563	0.0236577	0.0456541
45	0.984252	0.708266	0.735491	0.834994		45	0	0.0291188	0.0118288	0.0456541
46	0.314961	0.954619	0.843123	0.777409		46	0.077821	0.0582375	0.0236577	0
47	0.708661	0.831442	0.807246	0.834994		47	0	0.0291188	0.0473153	0
48	0.472441	0.492707	0.843123	1.00775		48	0	0.0291188	0	0.0456541
49	0.826772	0.769854	0.735491	1.00775		49	0.0389105	0.0582375	0.0236577	0.022827
50	0.551181	0.708266	0.771368	0.662237		50	0.0389105	0.0582375	0.0118288	0.136962
51	0.984252	0.554295	0.699613	1.06534		51	0.0389105	0.0291188	0.0354865	0.0456541
52	0.472441	0.893031	0.627858	0.719823		52	0	0	0.0591441	0.022827
53	0.708661	0.554295	0.986634	0.777409		53	0.0389105	0.0291188	0.0473153	0.0684811
54	0.314961	1.0778	0.879001	1.00775		54	0	0	0.0828018	0.022827
55	0.984252	0.615883	0.663735	0.518272		55	0	0	0.0354865	0.022827
56	0.708661	0.307942	0.950756	0.604651		56	0	0	0.0354865	0.0456541
57	0.984252	0.646677	0.735491	0.777409		57	0	0.0873563	0.0236577	0.0913082
58	0.905512	0.615883	0.807246	0.662237		58	0.077821	0	0.0828018	0
59	0.629921	0.708266	0.843123	0.950166		59	0.0389105	0	0.0236577	0.022827
60	0.787402	0.893031	0.771368	0.719823		60	0	0.0582375	0.124203	0.022827
61	0.787402	1.01621	0.699613	0.950166		61	0.0389105	0.0291188	0.0118288	0.022827
62	0.826772	0.646677	0.59198	1.35327		62	0.077821	0.0582375	0.0591441	0
63	0.826772	0.646677	0.699613	0.777409		63	0.0389105	0.0291188	0.0354865	0.022827
64	0.708661	0.708266	0.556103	0.777409		64	0.0389105	0.0291188	0.0236577	0
65	0.551181	0.646677	0.627858	0.719823		65	0.077821	0	0.0236577	0.022827
66	0.905512	0.492707	0.843123	1.29568		66	0	0.0291188	0.0473153	0.0456541
67	0.708661	0.646677	0.807246	0.834994		67	0.0389105	0.116475	0.0118288	0.0456541
68	0.472441	0.893031	0.879001	0.604651		68	0	0	0.0354865	0.0456541
69	0.826772	0.615883	0.484348	0.719823		69	0.077821	0	0.0946306	0.022827
70	0.629921	0.708266	0.59198	0.777409		70	0.0389105	0.0582375	0.0236577	0
71	0.787402	0.954619	0.771368	0.719823		71	0.077821	0.0291188	0.0236577	0.022827
72	0.23622	0.431118	0.59198	0.518272		72	0.155642	0	0.0473153	0
73	0.826772	1.26256	0.699613	0.662237		73	0	0.0582375	0.0236577	0.022827
74	0.787402	0.36953	0.520225	0.89258		74	0	0.0291188	0.0236577	0.0456541
75	0.393701	0.893031	0.484348	0.575858		75	0	0	0.0354865	0.022827
76	0.314961	0.708266	0.44847	0.950166		76	0.0389105	0	0.0591441	0.022827
77	0.551181	0.646677	0.627858	0.662237		77	0	0.0582375	0.106459	0.0684811
78	0.472441	0.708266	0.807246	0.777409		78	0.077821	0	0.0236577	0.022827
79	0.472441	0.492707	0.699613	0.777409		79	0.116732	0.0291188	0.0118288	0.022827
80	0.984252	0.36953	0.520225	0.575858		80	0	0.0291188	0.0236577	0.0456541
81	0.905512	0.708266	0.771368	0.575858		81	0.0389105	0.0582375	0.0118288	0
82	0.629921	0.554295	0.735491	0.518272		82	0.0389105	0.0291188	0.0473153	0.0456541
83	0.826772	0.708266	0.735491	0.604651		83	0	0.0582375	0.0591441	0.0913082
84	0.629921	0.431118	0.484348	0.518272		84	0.0389105	0.0873563	0.070973	0.022827
85	0.393701	0.431118	0.663735	0.604651		85	0.077821	0.0291188	0.0473153	0.0456541
86	0.23622	0.554295	0.627858	0.662237		86	0.116732	0.0291188	0	0.0456541
87	0.629921	0.36953	0.950756	0.604651		87	0.0389105	0	0.0354865	0
88	0.708661	0.954619	0.412592	0.604651		88	0.0389105	0	0.0828018	0.0456541
89	0.551181	0.646677	0.627858	0.518272		89	0.0389105	0.0291188	0.0236577	0.022827
90	0.472441	0.431118	0.807246	0.604651		90	0.0389105	0	0.0354865	0.022827
91	0.787402	0.554295	0.663735	0.345515		91	0.272374	0.0582375	0.0236577	0.0913082
92	0.472441	0.708266	0.627858	0.89258		92	0.077821	0.0291188	0.070973	0.0456541
93	0.23622	0.646677	0.44847	0.575858		93	0.0389105	0.0873563	0.0354865	0.0456541
94	0.472441	0.36953	0.771368	0.777409		94	0.0389105	0	0.0236577	0.022827
95	0.472441	0.646677	0.44847	0.719823		95	0	0.0582375	0.0473153	0.022827
96	0.393701	0.492707	0.663735	0.834994		96	0.077821	0.0873563	0.070973	0.0456541
97	0.393701	0.431118	0.59198	0.834994		97	0.0389105	0.0291188	0.0236577	0.0456541
98	0.393701	0.246353	0.44847	0.460687		98	0	0.0873563	0.0828018	0.022827
99	0.708661	0.646677	0.735491	0.777409		99	0.077821	0.0582375	0.0591441	0.022827
100	0.787402	0.492707	0.44847	0.777409		100	0.077821	0.116475	0.0828018	0.0913082
101	0.905512	0.708266	0.358776	0.518272		101	0	0.0291188	0.0236577	0.0913082
102	0.629921	0.646677	0.556103	0.604651		102	0.0389105	0.0582375	0.0354865	0.0684811
103	0.787402	0.246353	0.412592	0.834994		103	0.077821	0.0291188	0.0236577	0.0684811
104	0.551181	0.554295	0.322898	0.662237		104	0.0389105	0.0582375	0.0118288	0.022827
105	0.393701	0.893031	0.663735	0.662237		105	0.077821	0.0291188	0.0828018	0.0456541
106	0.23622	0.246353	0.556103	0.719823		106	0.077821	0	0.0236577	0.0456541
107	0.708661	0.708266	0.358776	0.662237		107	0.116732	0.0873563	0.0946306	0.022827
108	0.0787402	0.307942	0.287021	0.604651		108	0.077821	0.116475	0.0354865	0.0684811
109	0.15748	0.554295	0.520225	0.89258		109	0.0389105	0	0.0473153	0.0684811
110	0.23622	0.615883	0.215266	0.403101		110	0.0389105	0	0.0354865	0.022827
111	0.472441	0.492707	0.358776	0.345515		111	0.0389105	0.0291188	0.0473153	0.022827
112	0.393701	0.184765	0.412592	0.403101		112	0.0389105	0.0582375	0.0236577	0.0684811
113	0.551181	0.431118	0.484348	0.230343		113	0.077821	0.0582375	0.0473153	0.0456541
114	0.472441	0.554295	0.376715	0.518272		114	0.116732	0.0582375	0.0236577	0
115	0.23622	0.36953	0.556103	0.604651		115	0.0389105	0.0291188	0.0591441	0.0456541
116	0.551181	0.36953	0.520225	0.345515		116	0.0389105	0.0582375	0.070973	0.136962
117	0.314961	0.123177	0.287021	0.604651		117	0.077821	0.0291188	0.0473153	0.0456541
118	0.826772	0.554295	0.44847	0.518272		118	0	0	0.0354865	0.0456541
119	0.393701	0.36953	0.251143	0.518272		119	0	0.0582375	0.0118288	0.022827
120	0.15748	0.36953	0.520225	0.518272		120	0.077821	0.0582375	0.0473153	0.0456541
121	0.393701	0.431118	0.179388	0.777409		121	0	0	0	0.022827
122	0.551181	0.123177	0.251143	0.345515		122	0	0.0582375	0.070973	0.0684811
123	0.314961	0.307942	0.358776	0.287929		123	0.0389105	0.0873563	0.0354865	0.0684811
124	0.15748	0.36953	0.322898	0.575858		124	0.077821	0.0582375	0.0118288	0.0684811
125	0.0787402	0.36953	0.376715	0.719823		125	0.194553	0.0582375	0.0591441	0.0456541
126	0.15748	0.431118	0.412592	0.403101		126	0.0389105	0.0291188	0.0236577	0.022827
127	0.23622	0.184765	0.287021	0.518272		127	0	0.0291188	0.0354865	0
128	0	0.431118	0.287021	0.460687		128	0.077821	0	0.0354865	0.114135
129	0.314961	0.246353	0.44847	0.403101		129	0.077821	0.0582375	0.0828018	0.0456541
130	0.314961	0.36953	0.251143	0.518272		130	0.0389105	0	0.0591441	0.0684811
131	0.23622	0.554295	0.376715	0.0575858		131	0	0.116475	0.0236577	0.0456541
132	0.23622	0.36953	0.376715	0.604651		132	0.194553	0	0.0591441	0.0456541
133	0.314961	0.769854	0.322898	0.230343		133	0.116732	0	0.0591441	0.136962
134	0.472441	0.36953	0.215266	0.518272		134	0	0	0.0354865	0.022827
135	0.23622	0.184765	0.287021	0.287929		135	0	0.0582375	0.0591441	0.0456541
136	0.23622	0.246353	0.251143	0.460687		136	0.077821	0.0291188	0.0591441	0.22827
137	0.15748	0.0615883	0.215266	0.403101		137	0	0.0291188	0.0354865	0.0456541
138	0.393701	0.0615883	0.251143	0.518272		138	0	0.0291188	0.0473153	0.0684811
139	0.23622	0.307942	0.107633	0.604651		139	0	0.0873563	0.0354865	0.022827
140	0.23622	0.184765	0.376715	0.834994		140	0.077821	0.0582375	0.0591441	0.022827
141	0.23622	0.246353	0.287021	0.460687		141	0.077821	0.0582375	0.0236577	0.114135
142	0.393701	0.246353	0.358776	0.575858		142	0	0.0291188	0.070973	0.0684811
143	0.15748	0.0615883	0.287021	0.230343		143	0	0.0873563	0.0354865	0
144	0.15748	0.184765	0.358776	0.172757		144	0.077821	0.0582375	0.0473153	0.0456541
145	0.23622	0.246353	0.107633	0.230343		145	0.0389105	0	0.0828018	0.022827
146	0.15748	0.123177	0.251143	0.115172		146	0.233463	0	0.0118288	0.022827
147	0.314961	0.246353	0.251143	0.403101		147	0	0.116475	0.0118288	0.022827
148	0	0.184765	0.287021	0.230343		148	0	0	0.070973	0.0684811
149	0.314961	0.307942	0.215266	0.287929		149	0.194553	0	0.0473153	0.022827
150	0.0787402	0.184765	0.179388	0.403101		150	0.077821	0.116475	0.0118288	0
151	0.15748	0.0615883	0.215266	0.172757		151	0.077821	0	0	0.0684811
152	0.0787402	0	0.287021	0.230343		152	0.077821	0	0.0591441	0.022827
153	0.393701	0.184765	0.251143	0.345515		153	0	0.0582375	0.0236577	0.0913082
154	0.393701	0.123177	0.107633	0.518272		154	0.0389105	0.0291188	0.0236577	0.022827
155	0.15748	0.246353	0.287021	0.345515		155	0.0389105	0.0582375	0.0473153	0.0913082
156	0.15748	0.0615883	0.251143	0.287929		156	0	0	0.0354865	0.022827
157	0.0787402	0.0615883	0.287021	0.172757		157	0	0.0291188	0.0236577	0.022827
158	0.314961	0.123177	0.179388	0.230343		158	0.077821	0.0291188	0.0118288	0.0684811
159	0.314961	0.184765	0.251143	0.172757		159	0.116732	0.0291188	0.0354865	0.0913082
160	0.0787402	0.0615883	0.215266	0.345515		160	0	0.0582375	0.0118288	0.0456541
161	0.15748	0.36953	0.179388	0.287929		161	0.0389105	0.0582375	0.0118288	0.136962
162	0.15748	0.307942	0.215266	0.230343		162	0.0389105	0.0873563	0.0118288	0.0456541
163	0	0	0.179388	0.403101		163	0.116732	0.0873563	0.0236577	0.0684811
164	0.15748	0.554295	0.0717552	0.115172		164	0	0.0582375	0.0118288	0
165	0.0787402	0.0615883	0.107633	0.172757		165	0.077821	0	0.0118288	0.0456541
166	0.15748	0.0615883	0.215266	0.287929		166	0.0389105	0.0291188	0.0118288	0.0913082
167	0.23622	0.184765	0.0358776	0.115172		167	0	0.0582375	0.0118288	0.0913082
168	0.23622	0.246353	0.14351	0.287929		168	0.077821	0.0582375	0.0354865	0.0684811
169	0.15748	0.246353	0.251143	0		169	0.0389105	0	0.0236577	0.0684811
170	0	0.184765	0.0717552	0.230343		170	0	0.0291188	0.0236577	0.022827
171	0.0787402	0.0615883	0.179388	0.0575858		171	0.0389105	0.0582375	0	0.022827
172	0.23622	0	0.107633	0.0575858		172	0	0	0.0236577	0.022827
173	0	0.307942	0.179388	0.115172		173	0.0389105	0	0.0473153	0.0456541
174	0.0787402	0	0.0717552	0.230343		174	0	0.0291188	0.0473153	0.022827
175	0.23622	0.184765	0.0717552	0.115172		175	0	0	0.0591441	0.0684811
176	0.15748	0.0615883	0.107633	0.115172		176	0	0	0.0354865	0.022827
177	0.0787402	0.123177	0.14351	0.172757		177	0.077821	0.0291188	0.0236577	0.0456541
178	0	0.0615883	0.107633	0.0575858		178	0.0389105	0	0.0354865	0
179	0	0.0615883	0.14351	0.172757		179	0.077821	0.0582375	0.0473153	0.0456541
180	0	0.246353	0.179388	0.172757		180	0.0389105	0	0.0473153	0.0456541
181	0.0787402	0.0615883	0.0358776	0.115172		181	0.077821	0.0582375	0.0591441	0
182	0.0787402	0.0615883	0.107633	0.0575858		182	0.0389105	0	0.0473153	0.022827
183	0.0787402	0.0615883	0.358776	0.115172		183	0.0389105	0.0873563	0	0.022827
184	0	0.123177	0.179388	0.115172		184	0.116732	0.0873563	0.0118288	0.0913082
185	0.0787402	0.184765	0.14351	0.172757		185	0.077821	0.0291188	0.0236577	0.0684811
186	0.0787402	0	0.0717552	0.230343		186	0	0.0291188	0.0236577	0.0456541
187	0.15748	0.123177	0.215266	0.0575858		187	0	0.0291188	0.0354865	0
188	0.0787402	0.184765	0.14351	0.230343		188	0.0389105	0.116475	0	0.0913082
189	0.0787402	0.0615883	0.0358776	0.287929		189	0.155642	0.0873563	0.0473153	0.0684811
190	0.15748	0.123177	0.107633	0.115172		190	0.0389105	0.0582375	0.0118288	0.022827
191	0.0787402	0.0615883	0.107633	0.287929		191	0	0.0582375	0	0.022827
192	0.0787402	0	0.107633	0.172757		192	0	0.0291188	0.0118288	0.022827
193	0.15748	0	0.107633	0.0575858		193	0	0.0291188	0.0118288	0.0913082
194	0	0	0.179388	0.172757		194	0.077821	0.0582375	0.0118288	0.0456541
195	0.15748	0.0615883	0.14351	0.0575858		195	0.077821	0	0.0354865	0
196	0.15748	0.123177	0.107633	0.115172		196	0.155642	0.0291188	0.0354865	0.022827
197	0.23622	0.184765	0.215266	0.115172		197	0.116732	0	0.0354865	0.0456541
198	0	0.123177	0.107633	0.172757		198	0	0.0291188	0.0118288	0.0684811
199	0.0787402	0.0615883	0	0		199	0.116732	0.0873563	0.0236577	0.0684811
200	0.15748	0.0615883	0.0358776	0.287929		200	0.077821	0.262069	0.0118288	0.022827
201	0	0.0615883	0.179388	0		201	0	0.0873563	0.0236577	0.022827
202	0.23622	0.123177	0.14351	0.0575858		202	0	0.0291188	0.0118288	0.022827
203	0.314961	0	0.0717552	0.287929		203	0.0389105	0	0.0236577	0
204	0.314961	0.184765	0.0717552	0.0575858		204	0.116732	0.0873563	0	0.022827
205	0.23622	0	0.14351	0.230343		205	0.0389105	0	0	0.0684811
206	0.0787402	0	0.0358776	0.0575858		206	0.077821	0	0.0118288	0

## Sheet: 2C
	Bin 0	Bin 1	Bin 2	Bin 3	Bin 4	Bin 5	Bin 6	Bin 7	Bin 8	Bin 9	Bin 10	Bin 11	Bin 12	Bin 13	Bin 14	Bin 15	Bin 16	Bin 17	Bin 18	Bin 19
0	0.178661	0.52131	0.327988	0.539509	0.587169	0.549744	0.615424	0.397819	0.256319	0.35544	0.651118	0.499499	0.406525	0.262782	0.476872	0.220974	0.50397	0.460937	0.540982	0.333113
1	0.358834	0.402104	0.521728	0.239213	0.595431	0.206582	0.530224	0.428825	0.239875	0.298744	0.555032	0.478039	0.441883	0.314745	0.510134	0.142018	0.441692	0.503018	0.544875	0.16054
2	0.357175	0.453519	0.230394	0.452211	0.425907	0.703763	0.451125	0.274103	0.263554	0.389981	0.36294	0.547534	0.475315	0.334643	0.51436	0.13034	0.404519	0.505698	0.432686	0.158589
3	0.305957	0.377359	0.340405	0.268238	0.649342	0.545299	0.484885	0.494744	0.359375	0.332296	0.417418	0.45446	0.467868	0.355066	0.546576	0.309476	0.452552	0.564062	0.346846	0.149768
4	0.218947	0.337777	0.2519	0.268044	0.659011	0.545275	0.320565	0.32138	0.431751	0.539854	0.352744	0.408773	0.485874	0.34419	0.645808	0.226315	0.474318	0.661015	0.401852	0.210208
5	0.281674	0.402029	0.214946	0.284197	0.499717	0.768072	0.306089	0.330232	0.548817	0.507503	0.81569	0.691504	0.558708	0.379682	0.487794	0.547253	0.37509	0.753987	0.335405	0.215176
6	0.365239	0.592974	0.31752	0.323319	0.467835	0.797173	0.388753	0.341675	0.356463	0.565168	0.817374	0.731628	0.599211	0.192945	0.544943	0.596585	0.281799	0.654592	0.346423	0.274504
7	0.393248	0.741556	0.422767	0.239197	0.537627	0.854466	0.515767	0.352208	0.375097	0.571833	0.752979	1.02142	0.531106	0.34255	0.385212	0.590423	0.410424	0.545826	0.390464	0.21948
8	0.377876	0.711388	0.348396	0.426486	0.748849	0.796971	0.614436	0.3182	0.374648	0.615173	0.831797	0.95451	0.745376	0.504808	0.572588	0.566478	0.383352	0.511646	0.436622	0.193885
9	0.162141	0.513637	0.388529	0.508691	0.784031	0.891161	0.636562	0.400099	0.305636	0.567739	0.810903	1.06794	0.644824	0.215412	0.491799	0.651758	0.44421	0.57446	0.365461	0.19707
10	0.192575	0.630539	0.469447	0.515236	0.810972	0.859027	0.663226	0.512548	0.34654	0.434665	0.67309	1.02507	0.686617	0.178862	0.413972	0.666753	0.50481	0.645589	0.263008	0.224233
11	0.211689	0.615075	0.500299	0.764815	0.801128	0.639162	0.622761	0.491463	0.316533	0.508977	0.755656	0.940011	0.667732	0.266661	0.291338	0.604842	0.547575	0.71899	0.243384	0.187709
12	0.195107	0.695767	0.391263	0.834782	0.820824	0.880874	0.600853	0.566647	0.333661	0.521069	0.742671	0.947583	0.578827	0.249492	0.245869	0.591459	0.49272	0.677756	0.210125	0.178484
13	0.224072	0.679421	0.584938	0.85922	0.97093	0.720576	0.68813	0.622551	0.292506	0.564001	0.794787	0.972321	0.651745	0.332962	0.360901	0.636307	0.464093	0.683321	0.31712	0.205609
14	0.27676	0.761219	0.573893	1.00065	0.852572	0.752236	0.726877	0.782568	0.36082	0.629018	0.723934	0.9015	0.660319	0.280105	0.445003	0.617671	0.560351	0.706442	0.207933	0.253243
15	0.215495	0.639135	0.675609	0.946931	0.861172	0.661648	0.638088	0.623403	0.27598	0.607401	0.883003	0.867757	0.726269	0.311473	0.365842	0.678193	0.54066	0.656801	0.208645	0.254772
16	0.202933	0.671259	0.516755	0.843587	0.987944	0.850764	0.681996	0.628355	0.222618	0.575521	0.905565	0.825675	0.684304	0.315348	0.54696	0.685136	0.555386	0.719386	0.21585	0.208208
17	0.190031	0.626346	0.759373	0.862845	1.05429	0.725595	0.646147	0.75802	0.476894	0.65944	0.906367	0.926652	0.702694	0.420389	0.657746	0.579679	0.621765	0.718323	0.261629	0.176648
18	0.235043	0.655362	0.614021	0.950181	0.90358	0.843479	0.651257	0.709232	0.598245	0.592078	0.878438	0.879037	0.644578	0.37102	0.477166	0.698295	0.641847	0.731538	0.237547	0.219297
19	0.259418	0.618211	0.743726	0.886353	0.913259	0.698907	0.604322	0.777104	0.53966	0.661147	0.882251	0.889572	0.656553	0.363175	0.459639	0.726005	0.635709	0.641172	0.188597	0.220249
20	0.316956	0.642462	0.530354	0.93813	0.947106	0.886163	0.548725	0.656504	0.801868	0.733779	0.872434	0.800871	0.63646	0.317019	0.572055	0.657265	0.660763	0.688123	0.225058	0.188899
21	0.282627	0.660289	0.650273	0.958039	0.851904	0.78308	0.661889	0.777863	0.72281	0.777165	0.838989	0.809457	0.588578	0.236435	0.60747	0.565357	0.625044	0.480847	0.183438	0.173265
22	0.318253	0.596908	0.751502	0.937215	0.791076	0.841865	0.634057	0.755749	0.231807	0.816912	0.683838	0.901764	0.734424	0.321328	0.30142	0.699875	0.525329	0.543799	0.166511	0.196592
23	0.306898	0.625545	0.822349	0.909343	0.840333	0.678057	0.692999	0.717644	0.823925	0.64031	0.786919	0.76497	0.644507	0.290377	0.413965	0.647796	0.612565	0.521194	0.166526	0.178306
24	0.310913	0.645355	0.825059	0.811991	0.861714	0.751222	0.697968	0.794949	0.716815	0.633802	0.86734	0.94952	0.637521	0.292588	0.484187	0.502734	0.593137	0.580686	0.238348	0.207779
25	0.282471	0.610593	0.797173	0.987381	0.959073	0.827417	0.659193	0.756384	0.540608	0.605109	0.803197	0.930503	0.714104	0.301095	0.464326	0.668526	0.550134	0.519705	0.237403	0.221113
26	0.253436	0.631734	0.804552	1.0146	0.71579	0.886499	0.628334	0.753181	0.706117	0.573632	0.74524	0.905605	0.619584	0.349175	0.481004	0.730623	0.57107	0.548756	0.231655	0.169344
27	0.303065	0.677921	0.914658	0.848166	0.793888	0.700453	0.649079	0.716079	0.803079	0.614305	0.832331	1.08538	0.626864	0.325653	0.443014	0.669811	0.590023	0.518867	0.214888	0.208622
28	0.244339	0.617379	0.848697	0.86417	0.894518	0.632535	0.708692	0.887171	0.724955	0.748487	0.866821	1.01345	0.625983	0.226295	0.508366	0.68293	0.575757	0.558245	0.221432	0.175941
29	0.261808	0.629507	0.737793	0.896892	0.922398	0.760249	0.736061	0.974484	0.661837	0.831099	0.810448	0.799631	0.583963	0.318778	0.715516	0.623833	0.614331	0.561554	0.227213	0.179139
30	0.274969	0.57722	0.739358	0.736062	0.85615	0.700164	0.806367	0.857332	0.52484	0.674243	0.926475	0.96632	0.624763	0.321988	0.62631	0.721599	0.669798	0.488617	0.17884	0.221315
31	0.31465	0.664189	0.813966	0.880137	0.805538	0.724667	0.690899	0.871321	0.61981	0.762577	0.890412	0.844582	0.608158	0.357423	0.523118	0.72745	0.549101	0.57577	0.189444	0.210125
32	0.279865	0.675929	0.616525	0.811013	0.774528	0.715784	0.812261	0.789632	0.682558	0.659068	0.942228	0.905111	0.658059	0.276055	0.634102	0.730126	0.586606	0.599105	0.2165	0.199922
33	0.334314	0.627538	0.783181	0.873993	0.713202	0.695234	0.805508	0.820306	0.620594	0.801897	1.00105	0.861146	0.416816	0.331324	0.704645	0.712403	0.601706	0.52733	0.214129	0.172601
34	0.301126	0.608046	0.913913	0.869483	0.850333	0.616372	0.824692	0.836208	0.420314	0.718853	0.955265	0.686183	0.493873	0.324992	0.585775	0.710913	0.552126	0.563519	0.219529	0.204223
35	0.301452	0.71833	0.788831	0.802586	0.804331	0.547504	0.929753	0.816922	0.292105	0.753815	0.90513	0.709769	0.390462	0.247397	0.52996	0.759608	0.609455	0.522173	0.208218	0.251069
36	0.327705	0.640592	0.802781	0.845879	0.894109	0.749398	0.885212	0.791455	0.215978	0.809246	0.922295	0.717345	0.447232	0.390941	0.639133	0.763852	0.485311	0.514218	0.235226	0.259287
37	0.304755	0.676121	0.77239	0.859715	0.849392	0.731751	0.800744	0.744837	0.493704	0.875937	0.850808	0.72095	0.429532	0.182182	0.427808	0.71225	0.640392	0.551271	0.267635	0.190685
38	0.298521	0.649785	0.845011	0.864411	0.854798	0.686878	0.8096	0.784884	0.504836	0.86267	0.885691	0.741681	0.42075	0.252407	0.537285	0.656481	0.482646	0.518044	0.270555	0.21526
39	0.306154	0.63646	0.823532	0.877962	0.895462	0.724184	0.771332	0.766501	0.501918	0.834748	0.78533	0.683765	0.441872	0.25451	0.513536	0.65069	0.561906	0.456549	0.251661	0.229232
40	0.254158	0.65099	0.818538	0.984883	0.807526	0.719362	0.819639	0.808001	0.332999	0.886201	0.832097	0.707987	0.475589	0.439682	0.668106	0.530638	0.549892	0.518715	0.266045	0.166681
41	0.26241	0.616934	0.831543	0.974471	0.759005	0.654143	0.871628	0.778037	0.25302	0.934796	0.838692	0.824325	0.41846	0.239031	0.553855	0.598628	0.534634	0.473001	0.260407	0.181281
42	0.281658	0.587395	0.806335	0.909235	0.87797	0.80909	0.72845	0.819654	0.330829	0.80335	0.776109	0.698792	0.555319	0.293809	0.660913	0.582856	0.485301	0.45746	0.246313	0.245254
43	0.26497	0.539573	0.906184	0.942602	0.836927	0.690961	0.693333	0.80415	0.338999	0.781403	0.907063	0.710638	0.389494	0.175775	0.495766	0.626992	0.553687	0.458757	0.263471	0.34937
44	0.229108	0.500998	0.869538	1.00032	0.874831	0.708492	0.638989	0.830702	0.298273	0.721078	0.8773	0.714114	0.343951	0.200632	0.476652	0.668183	0.6276	0.468385	0.265741	0.299809
45	0.23611	0.515108	0.923734	0.896028	0.971887	0.789459	0.544095	0.76052	0.560943	0.819271	0.856964	0.779641	0.40136	0.288847	0.600377	0.68594	0.496651	0.537183	0.314782	0.276667
46	0.250116	0.571417	0.970775	0.946754	0.988175	0.885461	0.640493	0.851976	0.728499	0.870092	0.840448	0.720427	0.484055	0.211259	0.636685	0.68035	0.634789	0.515434	0.307337	0.270081
47	0.259177	0.610682	0.763678	0.962817	0.751006	0.817736	0.651403	0.765646	0.968891	0.891304	0.74828	0.76711	0.470201	0.250157	0.715829	0.710781	0.684831	0.604049	0.297572	0.252402
48	0.233666	0.573436	0.88713	0.901706	0.904401	0.863828	0.576766	0.750621	0.819151	0.822318	0.710192	0.842828	0.364346	0.509244	0.749106	0.699337	0.629425	0.583898	0.320229	0.272388
49	0.244733	0.32226	0.168764	0.607046	0.847143	0.861925	0.672433	0.90522	0.88484	0.83677	0.890902	0.726869	0.567515	0.572846	0.797324	0.65802	0.618853	0.480954	0.339742	0.231491
50	0.342755	0.514006	0.873454	0.804764	0.99693	0.979256	0.603265	0.817999	0.867648	0.867841	0.929815	0.757616	0.567529	0.572752	0.795487	0.638621	0.681643	0.597606	0.357402	0.270723
51	0.351531	0.491585	0.656585	0.786577	1.06501	1.0309	0.662376	0.916978	0.907269	0.998527	0.794121	0.872175	0.523492	0.622073	0.77247	0.586542	0.607048	0.489596	0.286554	0.223258
52	0.300734	0.47649	0.566075	0.722972	0.764297	0.923394	0.499206	0.773704	0.757041	0.942496	0.828143	0.691936	0.678721	0.797382	0.731448	0.654525	0.658859	0.552514	0.314306	0.252264
53	0.338041	0.543864	0.513127	0.549201	0.714789	0.911767	0.717756	0.97981	0.634527	0.802171	0.815027	0.851824	0.693809	0.753832	0.834855	0.569507	0.793562	0.693577	0.353946	0.275079
54	0.249916	0.509534	0.673068	0.439716	0.767085	1.02946	0.819916	0.967605	0.742815	0.934674	0.872978	0.786513	0.661446	0.736676	0.887241	0.522452	0.738588	0.610817	0.325963	0.305048
55	0.279886	0.567772	0.534603	0.562581	0.663402	1.0715	0.756924	0.746962	1.03033	0.920067	0.939252	0.861251	0.625722	0.830114	0.678102	0.220873	0.712278	0.657263	0.292142	0.201817
56	0.284063	0.579816	0.244887	0.434853	0.540968	1.014	0.799279	0.931771	0.927818	0.988943	0.934896	0.819673	0.590052	0.81802	0.637389	0.277413	0.745169	0.671094	0.355339	0.265725
57	0.222834	0.528379	0.381863	0.632567	0.550947	0.896515	0.891604	0.904755	0.924822	0.895446	1.03566	0.708376	0.654812	0.760799	0.581984	0.306646	0.696334	0.698326	0.385936	0.261659
58	0.251052	0.578689	0.603988	0.555404	0.613212	0.758623	0.956826	0.793715	0.898207	0.876494	0.868689	0.771763	0.774735	0.788823	0.668797	0.237128	0.696622	0.696016	0.413637	0.290424
59	0.274517	0.581068	0.613955	0.531902	0.665163	0.92417	1.00181	0.859023	0.904894	0.929763	0.917643	0.884854	0.759768	0.729309	0.835117	0.26455	0.751992	0.744056	0.417825	0.276039
60	0.26175	0.644662	0.713047	0.620048	0.754249	0.771517	0.922585	0.920111	0.776503	0.855959	0.755281	0.835309	0.660663	0.857798	0.633734	0.534397	0.840864	0.831117	0.313928	0.190801
61	0.243258	0.598731	0.6384	0.605394	0.794268	0.87661	0.885628	0.739201	0.993839	0.869983	0.911183	0.834935	0.556945	0.808912	0.592718	0.422043	0.804506	0.752419	0.320716	0.235651
62	0.237826	0.59289	0.743453	0.601869	0.921618	0.824559	1.06171	0.78835	1.0162	0.954098	0.896788	0.770757	0.624785	0.775443	0.475964	0.624725	0.800595	0.639413	0.277138	0.220876
63	0.328933	0.627437	0.745011	0.761684	0.804076	0.898472	0.825665	0.828709	0.986891	0.889166	0.892098	0.740671	0.775912	0.687895	0.702103	0.589426	0.627343	0.65988	0.296978	0.211902
64	0.20051	0.500394	0.803538	0.856545	1.01834	0.90596	0.847247	0.84103	0.976205	0.852469	0.899351	0.64121	0.633347	0.695545	0.549586	0.69784	0.651886	0.587923	0.272629	0.224218
65	0.199321	0.556872	0.879689	0.930853	0.831511	0.904837	0.893996	0.824053	0.971282	0.791423	0.906087	0.767732	0.485188	0.650119	0.501823	0.285388	0.602963	0.567442	0.34592	0.230539
66	0.194756	0.680194	0.825677	0.890177	0.948434	1.00042	0.882279	0.71964	0.940388	0.974113	0.867551	0.722901	0.419426	0.762581	0.482992	0.229052	0.631665	0.611358	0.322161	0.239367
67	0.202633	0.621882	0.818292	0.763006	0.800121	0.786898	0.965882	0.774522	0.968522	0.932406	0.800023	0.594871	0.569908	0.668222	0.401687	0.256329	0.670861	0.581445	0.359894	0.284105
68	0.215731	0.619176	0.875075	0.765078	0.758048	0.750672	0.854266	0.666051	0.834126	0.759163	0.889643	0.618416	0.408425	0.651729	0.408421	0.198935	0.555975	0.588716	0.386584	0.253951
69	0.309444	0.577277	0.764445	0.757985	0.79658	0.809927	0.762811	0.725636	0.699839	0.637211	0.825136	0.708412	0.635023	0.683336	0.219056	0.235534	0.574421	0.541302	0.355858	0.259539
70	0.319582	0.526582	0.645713	0.804844	0.847965	0.789711	0.857814	0.672597	0.436303	0.241797	0.74091	0.521671	0.531091	0.682562	0.539284	0.228662	0.620778	0.59386	0.348607	0.367148
71	0.359005	0.45721	0.569212	0.785401	0.806774	0.823952	0.806514	0.774494	0.457863	0.150492	0.215916	0.662874	0.480065	0.704156	0.199939	0.510861	0.589966	0.654421	0.415276	0.358002
72	0.296259	0.401797	0.830002	0.92148	0.655471	0.904501	0.881775	0.867389	0.738333	0.324957	0.25689	0.490944	0.452462	0.542788	0.700089	0.53021	0.762702	0.597274	0.417071	0.394408
73	0.292485	0.343576	0.918315	0.914654	0.768598	0.742749	0.976716	0.960214	0.443618	0.306341	0.233016	0.645064	0.168305	0.175027	0.672789	0.270171	0.801185	0.682118	0.534873	0.470923
74	0.272755	0.30285	0.381493	0.814875	0.973813	0.894088	1.00127	0.987853	0.47036	0.2708	0.202722	0.318163	0.190699	0.256114	0.54696	0.725118	0.584142	0.705628	0.467661	0.480021
75	0.286785	0.354275	0.233413	0.322928	0.949617	0.780446	0.939285	1.02767	0.43168	0.354429	0.2343	0.256754	0.246181	0.249966	0.552415	0.587022	0.618521	0.682546	0.553757	0.462471
76	0.272379	0.363004	0.211096	0.320467	0.775439	0.850199	0.995897	1.0923	0.563131	0.570794	0.249451	0.327639	0.201408	0.322522	0.532828	0.770699	0.701274	0.690403	0.553425	0.403808
77	0.256129	0.415447	0.20682	0.251703	0.785646	0.87762	0.873328	1.06413	0.67813	0.704225	0.257441	0.257172	0.209124	0.250131	0.52557	0.675021	0.714796	0.642336	0.55369	0.356391
78	0.318452	0.48098	0.167873	0.261394	0.838407	0.888655	0.84799	1.02642	0.769522	0.782226	0.491654	0.22271	0.209617	0.21425	0.227143	0.728728	0.573369	0.609975	0.520006	0.328654
79	0.27282	0.520283	0.196525	0.311122	0.775797	0.89544	0.70994	0.964448	0.918368	0.751157	0.287629	0.196549	0.201174	0.20327	0.445329	0.684496	0.505988	0.559818	0.532464	0.308166
80	0.282915	0.606766	0.197761	0.182279	0.644107	0.919859	0.860673	0.878769	0.825546	0.794217	0.32217	0.2386	0.24627	0.145897	0.26561	0.647101	0.523108	0.587006	0.530723	0.414492
81	0.350895	0.496068	0.189259	0.171592	0.737424	0.825898	0.89386	0.804588	0.923107	0.660314	0.262909	0.356749	0.31563	0.258968	0.494661	0.576884	0.564524	0.609284	0.506381	0.409317
82	0.422382	0.509089	0.227266	0.190881	0.418008	0.803852	0.789105	0.788168	0.906936	0.690515	0.232679	0.273981	0.234103	0.339664	0.669884	0.569169	0.504239	0.620457	0.561148	0.455555
83	0.513086	0.479835	0.267642	0.163158	0.232218	0.837912	0.840442	0.44852	0.893954	0.845917	0.479263	0.264036	0.328023	0.39214	0.627686	0.539625	0.424807	0.511852	0.544626	0.504907
84	0.440969	0.619174	0.213011	0.193549	0.650672	0.698686	0.4025	0.627279	0.773849	0.736297	0.452273	0.249663	0.347343	0.647306	0.712119	0.591754	0.618029	0.675808	0.613508	0.527162
85	0.586787	0.321146	0.204548	0.187177	0.407561	0.732381	0.239917	0.363702	0.927727	0.991915	0.515414	0.272812	0.451	0.584082	0.785789	0.593353	0.72294	0.758961	0.740649	0.546023
86	0.597682	0.457414	0.217856	0.189488	0.504496	0.447041	0.231106	0.47867	0.934182	0.99034	0.708992	0.338503	0.208737	0.54771	0.879761	0.613836	0.72096	0.663767	0.638262	0.547925
87	0.488225	0.63732	0.327463	0.181203	0.436692	0.37694	0.342502	0.581174	1.14473	1.00752	0.697588	0.243133	0.393986	0.286966	0.620388	0.830669	0.723618	0.72512	0.522265	0.376238
88	0.517437	0.219203	0.216114	0.176338	0.390307	0.433628	0.301273	0.67916	1.06807	1.36539	1.18507	0.812126	0.356124	0.539901	0.8684	0.778913	0.768959	0.669565	0.538212	0.347523
89	0.559884	0.616485	0.251032	0.177243	0.315427	0.330518	0.324931	0.831335	0.868028	1.02185	0.639651	0.248584	0.31201	0.415428	0.768665	0.745166	0.783633	0.720692	0.55344	0.319223
90	0.501134	0.413255	0.230316	0.178899	0.368406	0.332598	0.488591	0.940304	0.797308	0.871328	0.539956	0.280404	0.356121	0.398164	0.879719	0.637923	0.65839	0.745414	0.520872	0.293359
91	0.552928	0.417798	0.358476	0.205746	0.240163	0.38194	0.672315	0.957221	0.720038	0.914062	0.75872	0.397116	0.415363	0.228821	0.709281	0.618576	0.603586	0.71684	0.414812	0.347877
92	0.543216	0.476817	0.380524	0.224506	0.263276	0.312003	0.769796	0.937597	0.951638	0.804789	0.60951	0.291466	0.359361	0.275724	0.714272	0.616571	0.565523	0.640067	0.313235	0.459843
93	0.465484	0.376797	0.525849	0.22806	0.286051	0.366842	0.876418	0.827813	1.20801	0.954344	0.313421	0.249058	0.384119	0.298334	0.597148	0.7137	0.612041	0.609745	0.377717	0.381378
94	0.415373	0.392982	0.515149	0.40353	0.337192	0.171299	0.861074	1.00905	1.11139	0.93348	0.609928	0.439722	0.313864	0.569562	0.675129	0.722875	0.594124	0.629261	0.353596	0.251582
95	0.505827	0.274909	0.450927	0.421808	0.317122	0.209759	0.83703	0.981172	1.00664	0.242199	0.256251	0.292755	0.375596	0.563643	0.748426	0.518128	0.648034	0.472313	0.277844	0.551967
96	0.412293	0.208801	0.375756	0.335439	0.464408	0.269918	0.174983	0.548512	0.877835	0.669999	0.207097	0.253817	0.447248	0.472636	0.682627	0.563819	0.715057	0.601827	0.308928	0.723866
97	0.271845	0.277399	0.271959	0.333559	0.359355	0.279505	0.191853	0.404563	1.109	0.453216	0.250568	0.267313	0.416083	0.374356	0.540748	0.534276	0.746033	0.526227	0.218565	0.504824
98	0.584827	0.248384	0.239682	0.317679	0.365854	0.170942	0.256471	0.444087	1.08119	0.427996	0.287034	0.254052	0.431337	0.32293	0.604587	0.544171	0.650736	0.583984	0.416119	0.721267
99	0.443799	0.262608	0.190722	0.246155	0.303344	0.216979	0.220369	0.440465	1.13624	0.494804	0.442211	0.428227	0.402414	0.235958	0.562047	0.684367	0.722174	0.442371	0.254443	0.467226
100	0.752893	0.492762	0.243853	0.206388	0.291076	0.223474	0.24843	0.393415	0.878256	0.943781	0.508799	0.423294	0.329714	0.39574	0.561889	0.543091	0.72146	0.554316	0.511495	0.532389
101	0.36137	0.288506	0.190085	0.304068	0.356644	0.216266	0.302392	0.240278	0.97697	0.705395	0.259689	0.296472	0.323783	0.396326	0.619257	0.645336	0.758633	0.646784	0.329366	0.618613
102	0.38975	0.263662	0.295063	0.410748	0.209019	0.216127	0.258584	0.446912	1.11675	0.68428	0.259284	0.337342	0.410723	0.509151	0.465471	0.47868	0.714321	0.681236	0.401343	0.67008
103	0.156618	0.21161	0.249726	0.407209	0.162943	0.183763	0.285245	0.36993	1.05792	0.671863	0.205944	0.396909	0.301526	0.488364	0.522805	0.276824	0.676734	0.658864	0.259703	0.533042
104	0.368171	0.179285	0.257365	0.45513	0.161062	0.176982	0.282965	0.410305	0.893576	0.742811	0.347766	0.452881	0.290354	0.458546	0.555577	0.432179	0.666317	0.646229	0.203456	0.470707
105	0.421849	0.156219	0.24979	0.486051	0.173335	0.289671	0.553971	0.302936	0.638953	0.636423	0.398189	0.352435	0.242089	0.418658	0.462918	0.427371	0.549381	0.493714	0.198833	0.54151
106	0.239342	0.173592	0.249142	0.535485	0.214925	0.307281	0.544812	0.458511	0.438704	0.85231	0.430697	0.314928	0.298167	0.264044	0.540253	0.502002	0.481115	0.708566	0.35269	0.35347
107	0.15353	0.228838	0.613944	0.61318	0.204846	0.202739	0.509573	0.294295	0.541789	0.764981	0.37913	0.328217	0.371593	0.329988	0.645445	0.563657	0.527505	0.569383	0.348899	0.227059
108	0.317302	0.358093	0.73622	0.194756	0.153817	0.40938	0.61332	0.29626	0.452478	0.589719	0.595212	0.402151	0.343186	0.277521	0.419773	0.616224	0.673956	0.602634	0.358496	0.138001
109	0.288303	0.32252	0.633739	0.352992	0.224625	0.417114	0.58806	0.329754	0.503192	0.763771	0.373747	0.521614	0.308849	0.201554	0.461441	0.522204	0.677146	0.571363	0.383027	0.303095
110	0.298177	0.485647	0.553136	0.18482	0.197993	0.598038	0.480987	0.473574	0.827218	0.450345	0.342026	0.450874	0.407113	0.2655	0.189755	0.675893	0.637544	0.485267	0.235165	0.299758
111	0.290475	0.358934	0.552838	0.384661	0.273548	0.491115	0.507906	0.552569	0.755716	0.774008	0.198114	0.223194	0.381502	0.220667	0.459113	0.614136	0.711761	0.467854	0.218376	0.342223
112	0.222256	0.372798	0.711022	0.181598	0.324802	0.535497	0.558923	0.637336	0.663757	0.731117	0.177211	0.336321	0.361521	0.216929	0.412718	0.541352	0.61456	0.55412	0.249612	0.245547
113	0.124975	0.534365	0.741514	0.424773	0.23988	0.478481	0.537249	0.51069	0.786606	0.432864	0.139834	0.359462	0.362357	0.319113	0.580478	0.571527	0.653211	0.54275	0.290805	0.185714
114	0.399356	0.678931	0.617145	0.200346	0.502157	0.437243	0.563442	0.53624	0.533761	0.497583	0.306712	0.33055	0.380664	0.426419	0.597403	0.544539	0.612272	0.583476	0.284056	0.227311
115	0.317424	0.750281	0.414386	0.103089	0.292366	0.488026	0.320803	0.219619	0.41222	0.722627	0.662309	0.488488	0.483931	0.318695	0.541412	0.66139	0.578378	0.703417	0.315083	0.180946
116	0.398693	0.766264	0.489412	0.0945475	0.278701	0.482745	0.259005	0.249691	0.342429	0.76992	0.623958	0.572185	0.422866	0.356384	0.526105	0.582773	0.571885	0.687728	0.360771	0.144664
117	0.440653	0.78772	0.572181	0.113758	0.281125	0.454787	0.248589	0.27828	0.277576	0.39122	0.823003	0.5946	0.511202	0.266231	0.612264	0.194489	0.546659	0.705507	0.233173	0.306561
118	0.185465	0.698281	0.604966	0.412339	0.637296	0.298428	0.342224	0.302082	0.361111	0.49988	0.961025	0.802947	0.572042	0.331311	0.752271	0.416885	0.741849	0.688099	0.317677	0.198763
119	0.234019	0.793306	0.706046	0.556616	0.591573	0.246926	0.234577	0.215289	0.380082	0.590469	0.994303	0.875255	0.536192	0.272892	0.528224	0.520149	0.760823	0.733747	0.378285	0.162983
120	0.21702	0.785564	0.567642	0.502025	0.540818	0.479116	0.164409	0.213183	0.20498	0.692993	0.980869	0.912923	0.539538	0.310584	0.402101	0.543213	0.671524	0.767347	0.309218	0.15787
121	0.306011	0.826315	0.514948	0.437889	0.494059	0.553895	0.173477	0.212265	0.379647	0.611334	1.08792	0.818477	0.508622	0.268046	0.412642	0.593156	0.736358	0.683093	0.271168	0.164263
122	0.316066	0.753344	0.530525	0.508693	0.482876	0.460488	0.183205	0.246771	0.325528	0.805996	0.757114	0.971353	0.414474	0.344418	0.476611	0.241802	0.649793	0.643339	0.305155	0.13805
123	0.347409	0.640528	0.452335	0.429259	0.36905	0.502666	0.21365	0.241855	0.256311	0.642919	0.815897	0.737933	0.511764	0.369334	0.54738	0.291015	0.668486	0.637932	0.502157	0.426366
124	0.604232	0.589041	0.525566	0.49359	0.57152	0.338972	0.196588	0.184477	0.216196	0.669588	0.739946	0.330283	0.571098	0.331457	0.564939	0.230642	0.581452	0.597246	0.260142	0.325173
125	0.469219	0.611203	0.145642	0.535525	0.553925	0.357004	0.23409	0.183444	0.162629	0.556665	0.431759	0.47978	0.501191	0.313893	0.524996	0.270804	0.496338	0.613443	0.34762	0.42744
126	0.430994	0.503297	0.118365	0.420865	0.54439	0.373892	0.439224	0.22012	0.183031	0.546656	0.560627	0.663602	0.523502	0.435061	0.631931	0.195986	0.445303	0.520704	0.403431	0.338861
127	0.492846	0.473337	0.150169	0.359091	0.51016	0.460918	0.469376	0.157106	0.171095	0.439034	0.508292	0.708669	0.615034	0.252954	0.625288	0.2999	0.489388	0.430785	0.267972	0.333717
128	0.370414	0.514931	0.183657	0.40795	0.426722	0.520484	0.507077	0.196472	0.145943	0.501846	0.40027	0.92831	0.662648	0.240952	0.504933	0.215174	0.44367	0.340389	0.395133	0.36592
129	0.465148	0.416999	0.145963	0.445808	0.361646	0.494141	0.751198	0.226304	0.214979	0.496095	0.576398	0.774852	0.521077	0.366651	0.463203	0.406658	0.468271	0.373726	0.303768	0.406501
130	0.437828	0.18619	0.186757	0.508958	0.408825	0.444947	0.83164	0.348991	0.151197	0.177493	0.681642	0.662737	0.502337	0.203854	0.470769	0.480734	0.49847	0.392053	0.411945	0.3637
131	0.368951	0.229755	0.161472	0.379109	0.475032	0.446491	0.78591	0.470259	0.133772	0.240237	0.633007	0.689512	0.613486	0.342436	0.53423	0.505398	0.448813	0.387098	0.430614	0.335587
132	0.363476	0.228178	0.164824	0.429902	0.460823	0.381014	0.775473	0.519487	0.440978	0.751787	0.747006	0.67375	0.558951	0.198765	0.278894	0.656788	0.629148	0.44448	0.452458	0.30384
133	0.34906	0.269115	0.138818	0.140727	0.504514	0.410257	0.869795	0.552713	0.382845	0.583682	0.603696	0.696286	0.445115	0.140453	0.325162	0.674242	0.619947	0.417421	0.193693	0.348307
134	0.484227	0.35799	0.168986	0.210536	0.32825	0.394611	0.847996	0.500427	0.547839	0.733506	0.377423	0.723082	0.411639	0.138308	0.215084	0.534041	0.628457	0.419869	0.241296	0.199973
135	0.358516	0.653857	0.255335	0.220489	0.154791	0.486245	0.757691	0.453484	0.261122	0.684435	0.301446	0.550124	0.28096	0.139408	0.302522	0.477891	0.618002	0.462186	0.333296	0.397925
136	0.468207	0.199176	0.381148	0.151078	0.511005	0.449969	0.674454	0.385539	0.194832	0.453197	0.552692	0.187033	0.363534	0.134716	0.390962	0.570885	0.69246	0.503161	0.241153	0.486107
137	0.248342	0.275058	0.437033	0.582583	0.45777	0.619008	0.615116	0.52395	0.360928	0.551374	0.148132	0.372124	0.313881	0.170216	0.604407	0.466278	0.647023	0.460284	0.328606	0.491609
138	0.223944	0.311835	0.459109	0.293484	0.465078	0.676922	0.820527	0.453886	0.321016	0.605168	0.188337	0.303865	0.437479	0.246771	0.560698	0.3951	0.730062	0.509435	0.383305	0.508443
139	0.142516	0.229965	0.4762	0.440683	0.210427	0.590262	0.708242	0.448279	0.335105	0.581256	0.468158	0.219152	0.259154	0.406012	0.533784	0.465562	0.637928	0.489408	0.412169	0.469057
140	0.140682	0.181219	0.459759	0.445966	0.273719	0.599913	0.64449	0.412324	0.318912	0.583715	0.178882	0.269571	0.185	0.507387	0.58431	0.63254	0.635835	0.456108	0.350286	0.498207
141	0.233002	0.140742	0.269222	0.499269	0.354084	0.629444	0.612912	0.396477	0.373235	0.659549	0.270076	0.19159	0.420581	0.599716	0.49298	0.493496	0.683822	0.444224	0.429658	0.413238
142	0.192897	0.225641	0.478777	0.391572	0.341625	0.599448	0.635469	0.380117	0.307019	0.558341	0.309101	0.255	0.380946	0.688243	0.642426	0.553468	0.550121	0.45996	0.461683	0.406273
143	0.180143	0.276242	0.342269	0.500064	0.232276	0.638587	0.539701	0.333952	0.305878	0.584827	0.184451	0.298855	0.519982	0.465718	0.264245	0.227165	0.639053	0.39298	0.365121	0.377867
144	0.538618	0.338045	0.604789	0.318447	0.545581	0.512609	0.351124	0.353754	0.409602	0.584435	0.196145	0.267674	0.496753	0.526882	0.359392	0.23491	0.570754	0.487782	0.349655	0.271136
145	0.605163	0.342906	0.313118	0.227605	0.569694	0.501307	0.500394	0.287363	0.340429	0.533598	0.1996	0.270443	0.457292	0.409093	0.47619	0.308667	0.571221	0.513255	0.438424	0.492174
146	0.144613	0.357312	0.448278	0.163027	0.646984	0.444477	0.283411	0.33482	0.362998	0.437399	0.245859	0.331396	0.65824	0.441623	0.406916	0.226564	0.565175	0.460286	0.373205	0.671615
147	0.403245	0.436189	0.316629	0.373803	0.565825	0.357038	0.311542	0.401954	0.361258	0.400893	0.237372	0.226523	0.636159	0.554802	0.411319	0.232178	0.57481	0.467259	0.293827	0.2948
148	0.546102	0.441128	0.504714	0.433659	0.577242	0.435193	0.324721	0.322296	0.466258	0.327928	0.196408	0.272185	0.621714	0.464225	0.226048	0.453299	0.487119	0.519231	0.296645	0.549187
149	0.507085	0.34237	0.537847	0.489714	0.493516	0.380734	0.380021	0.375851	0.40442	0.639994	0.225995	0.320662	0.570709	0.554005	0.283418	0.398264	0.543179	0.4233	0.266514	0.525197
150	0.4795	0.379711	0.529351	0.558375	0.548393	0.279448	0.338344	0.402979	0.568864	0.430968	0.14538	0.265131	0.61744	0.437261	0.259076	0.19085	0.46689	0.417435	0.315184	0.362707
151	0.589207	0.440915	0.567516	0.618923	0.450407	0.235565	0.24368	0.407575	0.516698	0.702072	0.297285	0.296458	0.596161	0.712901	0.24629	0.244606	0.357904	0.436961	0.26167	0.537609
152	0.290707	0.466485	0.36895	0.657881	0.638275	0.19524	0.287345	0.364831	0.537221	0.708277	0.258515	0.318711	0.657458	0.519475	0.224491	0.293228	0.374192	0.506527	0.211883	0.24776
153	0.636713	0.474958	0.481333	0.673918	0.524407	0.137184	0.193677	0.390595	0.534185	0.691783	0.316072	0.400365	0.620929	0.49329	0.35926	0.439239	0.430678	0.47592	0.29169	0.517048
154	0.117521	0.42366	0.548056	0.669713	0.672421	0.191906	0.165608	0.282438	0.391564	0.845501	0.40174	0.429847	0.761712	0.284485	0.461685	0.584361	0.430928	0.6856	0.364116	0.17229
155	0.293896	0.556363	0.477684	0.788994	0.757097	0.25491	0.195819	0.338687	0.412634	0.971228	0.487519	0.413678	0.753379	0.46143	0.468025	0.369629	0.509569	0.632568	0.241181	0.16259
156	0.206889	0.449997	0.512132	0.751683	0.581201	0.137195	0.149382	0.331513	0.264304	0.892609	0.648962	0.529523	0.610861	0.507832	0.277336	0.476158	0.471073	0.663222	0.237836	0.195756
157	0.306168	0.411717	0.724267	0.716544	0.688163	0.256892	0.20736	0.234384	0.218279	0.722111	0.652943	0.592408	0.670763	0.507132	0.152496	0.272762	0.449972	0.592815	0.229842	0.169219
158	0.41999	0.454192	0.713262	0.590413	0.566016	0.516327	0.165389	0.203699	0.30725	0.459354	0.674766	0.470331	0.619151	0.571943	0.483844	0.520435	0.435664	0.572616	0.347671	0.171913
159	0.378997	0.521761	0.756811	0.55503	0.527425	0.625757	0.246055	0.183089	0.362329	0.694855	0.617886	0.325551	0.511348	0.599074	0.355703	0.402927	0.465574	0.495346	0.363343	0.233568
160	0.357899	0.566473	0.798899	0.500626	0.530465	0.678322	0.448548	0.204302	0.21782	0.550393	0.666961	0.36319	0.59062	0.585039	0.218274	0.404106	0.342775	0.359924	0.44163	0.456409
161	0.388297	0.485944	0.827089	0.41634	0.211882	0.605933	0.535151	0.285743	0.162046	0.448289	0.590267	0.436731	0.586854	0.477879	0.247148	0.517442	0.394412	0.173612	0.41417	0.571554
162	0.542224	0.530353	0.709908	0.13531	0.281722	0.517133	0.549212	0.31301	0.225116	0.571801	0.459683	0.54476	0.694664	0.550391	0.212081	0.245126	0.630181	0.262915	0.194609	0.616564
163	0.467876	0.600973	0.484612	0.176978	0.161696	0.571874	0.419641	0.385653	0.300776	0.509752	0.460715	0.516627	0.67984	0.522366	0.300205	0.274894	0.498913	0.25849	0.134268	0.450348
164	0.568602	0.595272	0.599442	0.173505	0.189711	0.556311	0.500851	0.30892	0.493118	0.315657	0.421224	0.566552	0.684057	0.466439	0.253734	0.262603	0.40183	0.370434	0.186129	0.67159
165	0.411382	0.593729	0.577437	0.145547	0.259294	0.505853	0.551325	0.369783	0.393135	0.372353	0.337455	0.446769	0.537645	0.506317	0.346448	0.169389	0.408413	0.291289	0.108384	0.537822
166	0.569556	0.54632	0.453031	0.312833	0.142465	0.482376	0.583437	0.280295	0.411334	0.162554	0.413127	0.564588	0.632564	0.467519	0.238622	0.33036	0.426892	0.35286	0.428003	0.626847
167	0.269488	0.569299	0.414483	0.542965	0.479286	0.336879	0.537617	0.27662	0.469558	0.137943	0.567601	0.470408	0.523957	0.197866	0.40305	0.216453	0.388304	0.533086	0.205274	0.61951
168	0.548164	0.425842	0.651074	0.551933	0.432355	0.53396	0.411517	0.275261	0.567221	0.289085	0.405414	0.484675	0.565401	0.40501	0.355716	0.130387	0.331814	0.5407	0.571812	0.487412
169	0.244184	0.281712	0.598788	0.474048	0.358163	0.618173	0.465824	0.244097	0.584656	0.273491	0.171504	0.516417	0.589502	0.455138	0.264538	0.312249	0.452838	0.651517	0.619445	0.588507
170	0.308513	0.428261	0.651977	0.566483	0.464383	0.330557	0.613458	0.39502	0.681404	0.246934	0.12519	0.518594	0.453204	0.4191	0.276834	0.226094	0.450552	0.704329	0.496391	0.645595
171	0.344736	0.123601	0.168952	0.647058	0.594591	0.400144	0.638469	0.284046	0.573426	0.400081	0.348207	0.472478	0.573287	0.455096	0.330392	0.24828	0.451825	0.733587	0.526213	0.562978
172	0.371216	0.180039	0.202082	0.529591	0.585825	0.45593	0.568898	0.539327	0.716455	0.462742	0.246091	0.485652	0.474376	0.387642	0.459365	0.203861	0.519074	0.766027	0.578087	0.61727
173	0.357248	0.281374	0.163992	0.39884	0.670652	0.480978	0.585762	0.22377	0.65602	0.534077	0.150281	0.450398	0.536522	0.396118	0.454028	0.191947	0.567872	0.716879	0.539502	0.526065
174	0.298835	0.385187	0.203451	0.347775	0.653518	0.487726	0.616999	0.689246	0.569265	0.174631	0.118463	0.520607	0.459367	0.362939	0.392261	0.366323	0.570313	0.669542	0.44283	0.410059
175	0.094307	0.409406	0.421751	0.641526	0.608917	0.461705	0.694803	0.26645	0.852146	0.496153	0.216489	0.611521	0.471273	0.384758	0.289681	0.179195	0.514957	0.649077	0.437617	0.432546
176	0.100582	0.417492	0.340148	0.540798	0.602933	0.470154	0.78335	0.661624	0.921028	0.608694	0.673608	0.453185	0.319506	0.342257	0.299918	0.22509	0.333017	0.65017	0.417613	0.454197
177	0.428008	0.231063	0.300842	0.582511	0.605577	0.619986	0.666676	0.886282	0.774431	0.558721	0.503406	0.228245	0.199482	0.415768	0.326529	0.344205	0.619601	0.469311	0.51196	0.241426
178	0.480169	0.228995	0.215331	0.505475	0.771967	0.514859	0.429784	0.673479	0.779535	0.73718	0.522225	0.299927	0.267273	0.117048	0.423021	0.472189	0.61602	0.448603	0.331535	0.53358
179	0.279103	0.614021	0.363818	0.552485	0.681337	0.173576	0.401787	0.571884	0.767404	0.74078	0.736285	0.3541	0.3146	0.188852	0.423496	0.433928	0.591494	0.49073	0.544945	0.548956
180	0.354683	0.315708	0.50033	0.477671	0.862126	0.515226	0.431176	0.530173	0.831974	0.697976	0.514857	0.445966	0.310211	0.35031	0.205115	0.447974	0.598483	0.45881	0.470778	0.594402
181	0.327498	0.449374	0.413429	0.62259	0.665738	0.432107	0.48331	0.615195	0.737076	0.719176	0.270912	0.520042	0.295863	0.364888	0.29107	0.507196	0.585719	0.350186	0.43945	0.522929
182	0.518864	0.362618	0.183916	0.317195	0.626513	0.552551	0.401827	0.582745	0.757216	0.481117	0.261103	0.585471	0.332637	0.448211	0.195378	0.527815	0.554435	0.353403	0.24341	0.533585
183	0.343951	0.335288	0.358884	0.389299	0.628841	0.505799	0.329477	0.619367	0.799233	0.562619	0.219757	0.507388	0.408822	0.498048	0.304269	0.480259	0.608088	0.361911	0.10659	0.50786
184	0.454149	0.352667	0.430349	0.373282	0.507524	0.592763	0.441662	0.682901	0.632035	0.396015	0.13079	0.480222	0.498407	0.563377	0.284107	0.449809	0.565386	0.438923	0.269803	0.555475
185	0.392535	0.465353	0.428534	0.514129	0.603276	0.553142	0.373877	0.663787	0.735119	0.493741	0.383031	0.523986	0.6547	0.655563	0.207071	0.4463	0.53682	0.559767	0.429274	0.565651
186	0.443799	0.356539	0.432201	0.452822	0.573027	0.508169	0.420569	0.45059	0.352072	0.554167	0.236384	0.400256	0.471838	0.56624	0.183475	0.477579	0.578427	0.511741	0.605726	0.546953
187	0.364701	0.29809	0.411319	0.500141	0.507863	0.406399	0.152088	0.447923	0.195549	0.386348	0.285305	0.785294	0.607727	0.575625	0.228773	0.48534	0.628627	0.59942	0.477966	0.497337
188	0.393498	0.267613	0.396139	0.578471	0.567389	0.4146	0.292791	0.366705	0.107898	0.453024	0.461281	0.601925	0.613074	0.44825	0.210096	0.575677	0.716061	0.615725	0.60513	0.407907
189	0.390332	0.291518	0.36503	0.494839	0.579847	0.468381	0.485312	0.169789	0.26681	0.419609	0.530971	0.575379	0.539146	0.150528	0.460974	0.437095	0.628016	0.692393	0.540501	0.54507
190	0.460632	0.289531	0.356184	0.583671	0.531225	0.504328	0.534924	0.269577	0.188254	0.444729	0.485825	0.583645	0.582663	0.144998	0.591651	0.444802	0.599942	0.620661	0.58804	0.510779
191	0.433571	0.34655	0.433626	0.218526	0.526306	0.410676	0.560522	0.324117	0.488837	0.327822	0.52817	0.506476	0.611737	0.42749	0.680318	0.373421	0.646469	0.658831	0.517106	0.583357
192	0.463407	0.348048	0.380349	0.133367	0.182943	0.489789	0.566858	0.457979	0.599025	0.515964	0.582693	0.393645	0.549109	0.413361	0.322111	0.593837	0.748723	0.71317	0.609789	0.614853
193	0.507575	0.478739	0.368539	0.390955	0.198299	0.171065	0.385144	0.60265	0.620519	0.522546	0.595064	0.315133	0.67279	0.331806	0.235041	0.534101	0.675643	0.635279	0.589594	0.503036
194	0.485212	0.348546	0.399399	0.501236	0.152186	0.244098	0.358314	0.624345	0.581962	0.6014	0.531024	0.568522	0.642095	0.681307	0.316908	0.513171	0.65475	0.617849	0.582885	0.460935
195	0.175362	0.264312	0.378159	0.222076	0.128443	0.424504	0.32102	0.742749	0.692369	0.580937	0.497201	0.506435	0.686197	0.659008	0.461045	0.527264	0.600696	0.526711	0.574385	0.524667
196	0.440163	0.295642	0.369827	0.222474	0.125278	0.400247	0.352981	0.773458	0.504008	0.185474	0.576553	0.676528	0.833832	0.449145	0.239933	0.63078	0.535972	0.518482	0.554611	0.59813
197	0.363845	0.411363	0.437188	0.319613	0.127535	0.40206	0.447472	0.817142	0.49136	0.222726	0.16578	0.529734	0.644473	0.665823	0.416254	0.737641	0.417151	0.517721	0.699725	0.610226
198	0.345601	0.322172	0.36928	0.29072	0.172108	0.500635	0.422142	0.948198	0.544002	0.183048	0.169778	0.427826	0.685359	0.301011	0.348636	0.634449	0.389685	0.390206	0.766783	0.622357
199	0.424429	0.273627	0.381339	0.488279	0.222152	0.463608	0.404048	0.84146	0.44623	0.137456	0.287647	0.506674	0.627438	0.392623	0.484204	0.726737	0.341949	0.159863	0.435415	0.605598
200	0.528218	0.41965	0.356193	0.526014	0.438227	0.312052	0.382182	0.79742	0.510672	0.221646	0.522906	0.387874	0.534355	0.500061	0.377972	0.644123	0.358158	0.127856	0.551685	0.145814
201	0.523537	0.475514	0.348906	0.470708	0.440397	0.423502	0.408213	0.668226	0.841949	0.401897	0.385138	0.432834	0.560625	0.582896	0.206775	0.508647	0.673619	0.220333	0.137186	0.313951
202	0.507339	0.41755	0.368945	0.393077	0.481463	0.500652	0.514503	0.641985	0.804673	0.604108	0.502899	0.523247	0.502134	0.594348	0.181208	0.57902	0.622268	0.335473	0.162736	0.291371
203	0.383417	0.260803	0.415706	0.282583	0.476945	0.47116	0.590718	0.660244	0.904202	0.60256	0.577634	0.61734	0.496632	0.599077	0.262298	0.671684	0.642506	0.43799	0.43567	0.295253
204	0.172965	0.238637	0.508301	0.206095	0.509997	0.614062	0.573753	0.868227	0.383869	0.673079	0.662373	0.553544	0.620382	0.519531	0.294854	0.687887	0.641273	0.713432	0.389234	0.269647
205	0.198794	0.158178	0.35794	0.245241	0.531086	0.698466	0.673039	0.781879	0.233729	0.586647	0.613797	0.638929	0.32943	0.568979	0.446159	0.645516	0.706486	0.736124	0.376384	0.204035
206	0.145652	0.162264	0.385635	0.434927	0.548923	0.610894	0.773564	0.813326	0.316026	0.826674	0.609152	0.75432	0.424709	0.149935	0.554106	0.521551	0.630834	0.609509	0.595532	0.586394
207	0.161994	0.253105	0.433745	0.506548	0.602218	0.781408	0.485843	0.388262	0.82453	0.684782	0.547473	0.693072	0.631714	0.117323	0.57008	0.392053	0.511453	0.576114	0.603763	0.40193
208	0.132771	0.274055	0.442751	0.501521	0.573194	0.853715	0.302525	0.394661	0.505913	0.670892	0.637123	0.560015	0.560183	0.591137	0.535353	0.392546	0.43779	0.625969	0.504437	0.484013
209	0.246196	0.390003	0.356171	0.363183	0.595204	0.742673	0.384219	0.257072	0.688157	0.665904	0.597396	0.626228	0.615867	0.595461	0.376593	0.254992	0.525868	0.547167	0.588922	0.464808
210	0.458441	0.243944	0.367446	0.20967	0.570743	0.703643	0.54865	0.180434	0.266973	0.69627	0.534334	0.55361	0.61453	0.697814	0.106885	0.395101	0.602404	0.583625	0.610548	0.555172
211	0.326329	0.222003	0.280344	0.414283	0.653304	0.774765	0.488538	0.418198	0.725701	0.443218	0.370829	0.643681	0.595803	0.752618	0.376178	0.268778	0.503488	0.644258	0.600681	0.514157
212	0.317588	0.264115	0.296315	0.417315	0.626236	0.723748	0.564581	0.596713	0.638555	0.547353	0.424172	0.574097	0.497725	0.672188	0.261548	0.218629	0.42988	0.676585	0.752336	0.485147
213	0.261567	0.29139	0.298162	0.303143	0.604301	0.581193	0.75457	0.380064	0.713548	0.471513	0.713797	0.584603	0.559495	0.544151	0.173237	0.188193	0.406909	0.618527	0.553734	0.411115
214	0.435521	0.32856	0.287979	0.487766	0.643846	0.404248	0.874821	0.682109	0.567056	0.16675	0.548335	0.477887	0.611006	0.494172	0.159949	0.210354	0.525972	0.531262	0.721223	0.378251
215	0.481854	0.280649	0.289355	0.531216	0.572753	0.382236	0.869855	0.699559	0.454216	0.251898	0.0916438	0.527751	0.677399	0.494438	0.16218	0.175419	0.453634	0.579724	0.678254	0.465827
216	0.353158	0.311862	0.315688	0.59748	0.422655	0.48799	0.723609	0.678262	0.553834	0.605636	0.168211	0.537126	0.345898	0.370618	0.362723	0.166349	0.445215	0.621662	0.778958	0.572028
217	0.367556	0.369018	0.354948	0.270438	0.568463	0.381346	0.827325	0.713321	0.656466	0.541071	0.537756	0.641483	0.465215	0.498599	0.139419	0.478252	0.647317	0.612044	0.60049	0.428793
218	0.566466	0.26763	0.350169	0.250912	0.304916	0.519756	0.342117	0.649106	0.791153	0.820764	0.529857	0.469435	0.441984	0.355748	0.244143	0.567098	0.6033	0.591327	0.620532	0.568925
219	0.549734	0.431784	0.351082	0.319109	0.42728	0.542328	0.24615	0.757201	0.824944	0.683148	0.571848	0.533956	0.598659	0.33531	0.217642	0.44834	0.735976	0.662478	0.461421	0.462171
220	0.318324	0.463384	0.397258	0.298983	0.352227	0.500776	0.218519	0.787994	0.776411	0.765923	0.38262	0.665278	0.621894	0.498905	0.199495	0.382221	0.603927	0.636798	0.511699	0.417577
221	0.503031	0.410917	0.335358	0.35439	0.367229	0.526682	0.438198	0.690429	0.667406	0.74334	0.71366	0.634612	0.496527	0.569379	0.34272	0.464932	0.564428	0.695119	0.20672	0.455031
222	0.498342	0.423435	0.366161	0.402467	0.359182	0.581296	0.523639	0.780685	0.589779	0.77022	0.517989	0.663018	0.440382	0.908402	0.394052	0.425631	0.624122	0.555172	0.330356	0.10426
223	0.506277	0.520172	0.25722	0.386036	0.383746	0.588179	0.579777	0.649003	0.548626	0.834397	0.394119	0.593069	0.473393	0.667595	0.30078	0.466763	0.643255	0.380378	0.247971	0.173699
224	0.474845	0.30355	0.441576	0.300647	0.392987	0.5768	0.511662	0.633612	0.670867	0.874669	0.346602	0.617067	0.605048	0.359482	0.356133	0.404878	0.628984	0.331317	0.160764	0.238738
225	0.49953	0.363111	0.380545	0.302479	0.454472	0.600457	0.418628	0.873534	0.717134	0.790321	0.557972	0.595241	0.693139	0.407687	0.286647	0.472188	0.55605	0.484212	0.369791	0.199682
226	0.399931	0.382028	0.40931	0.312253	0.407276	0.675758	0.628765	0.754175	0.648877	0.726337	0.564064	0.566622	0.596563	0.381444	0.275686	0.455288	0.513524	0.596138	0.509419	0.229177
227	0.32427	0.405172	0.395318	0.289881	0.336573	0.455746	0.54577	0.698562	0.805487	0.687316	0.442085	0.56371	0.491264	0.337995	0.171724	0.455594	0.476979	0.430476	0.550622	0.420826
228	0.290329	0.265106	0.370252	0.247893	0.392856	0.540758	0.619834	0.927291	0.648977	0.505286	0.774749	0.547588	0.486586	0.359053	0.358274	0.505988	0.501417	0.483045	0.581113	0.452708
229	0.278573	0.249631	0.289983	0.306111	0.442969	0.755794	0.650787	0.645855	0.700638	0.654581	0.642564	0.604706	0.51923	0.637251	0.421908	0.490825	0.580175	0.47338	0.59062	0.454446
230	0.0807997	0.232952	0.276959	0.24941	0.442525	0.713258	0.769701	0.831484	0.684789	0.812997	0.605517	0.493351	0.610611	0.481893	0.377157	0.512795	0.577503	0.602667	0.671043	0.397452
231	0.397322	0.419457	0.256721	0.309126	0.398556	0.588276	0.465972	0.711856	0.345548	0.879616	0.540816	0.49704	0.441882	0.447021	0.276731	0.306341	0.412109	0.497568	0.564485	0.652161
232	0.478786	0.335007	0.22035	0.291865	0.466494	0.55375	0.600094	0.568425	0.775805	0.705106	0.341807	0.362568	0.493407	0.548723	0.252275	0.375524	0.381593	0.452508	0.686011	0.559492
233	0.516317	0.208212	0.195028	0.315656	0.477886	0.562847	0.678992	0.524698	0.758775	0.774096	0.762014	0.248469	0.591657	0.397883	0.2831	0.321177	0.37268	0.400908	0.695596	0.519861
234	0.642035	0.265173	0.208542	0.29603	0.426028	0.616329	0.781208	0.688478	0.770972	0.671014	0.545353	0.493111	0.537702	0.359382	0.266713	0.335546	0.429308	0.500204	0.705141	0.599558
235	0.534422	0.333267	0.274958	0.316445	0.365365	0.772658	0.672838	0.811691	0.64483	0.470843	0.270092	0.667948	0.522442	0.386396	0.368507	0.234594	0.544526	0.442682	0.760898	0.57581
236	0.685234	0.320147	0.266965	0.341102	0.208344	0.597232	0.729109	0.817802	0.827772	0.69237	0.249341	0.595228	0.527507	0.549298	0.405639	0.280684	0.384739	0.500041	0.609863	0.640955
237	0.524423	0.27732	0.268223	0.411539	0.222201	0.533194	0.876677	1.13244	0.858785	0.588433	0.615405	0.557832	0.678458	0.453977	0.200662	0.585252	0.621193	0.446721	0.447761	0.555928
238	0.561395	0.276229	0.367641	0.298326	0.390346	0.213438	0.180543	0.612788	0.83451	0.893934	0.501234	0.669905	0.657466	0.509709	0.218518	0.362021	0.54971	0.481252	0.661766	0.31371
239	0.61452	0.482519	0.259642	0.254045	0.333855	0.322666	0.801886	0.798279	0.564884	0.383346	0.404576	0.638416	0.41789	0.273753	0.450154	0.146794	0.3974	0.547556	0.454741	0.385027

## Sheet: 2D
	Cell 0	Cell 1	Cell 2	Cell 3	Cell 4	Cell 5	Cell 6	Cell 7	Cell 8	Cell 9	Cell 10	Cell 11	Cell 12	Cell 13	Cell 14	Cell 15	Cell 16	Cell 17	Cell 18	Cell 19
0	0.27077	0	0.212833	0.0765654	0.0759189	0	0	0.0379987	0	0	0.0468397	0.0659227	0.295602	0.188006	0.142339	0.131068	0.142602	0	0.108045	0.0539119
1	0.285227	0	0.137653	0.0524853	0	0	0	0.112232	0	0	0.0530519	0	0.190272	0.197618	0.294715	0.154075	0.0770935	0	0.235991	0.0487973
2	0.280306	0.0531025	0.129341	0.10921	0.0986003	0.0804111	0	0	0	0	0.045082	0	0.126628	0.294021	0.283211	0.0631949	0.0884201	0	0.140728	0
3	0.295522	0	0	0.0414053	0.116209	0	0.0764144	0	0	0	0.1071	0	0.249645	0.287188	0.109075	0.0630473	0.0719523	0	0.104405	0
4	0.250567	0	0	0.0389009	0.0803868	0	0	0	0	0.0478781	0.0626129	0	0.162953	0.274468	0.171676	0.0900755	0.0825972	0	0.0392268	0
5	0.240665	0.136484	0	0.0761194	0.0388989	0	0	0.0513479	0	0	0.0453488	0	0	0.0964952	0.0409373	0	0.0571931	0	0.0562201	0
6	0.203152	0.205639	0.146693	0.110904	0.221714	0	0.052563	0	0	0	0.0565493	0	0	0.086708	0.0611552	0.0438675	0.0241379	0	0	0
7	0.227723	0.19204	0.194864	0.144225	0.609341	0.156505	0.248705	0.121891	0	0.188917	0.117518	0	0	0.174835	0.041897	0.137962	0.199237	0	0.0791367	0.0511204
8	0.123561	0.235975	0.317308	0.241786	0.900187	0.10729	0.325982	0.194098	0	0.0980278	0.107945	0	0.0834706	0.12506	0.0432043	0.1171	0.112069	0	0.0570033	0.0580774
9	0.262905	0.229614	0.247177	0.21702	0.797909	0.133978	0.37467	0.353548	0	0.0511541	0.110223	0	0.145799	0.130347	0.0242853	0.16604	0.0875745	0	0.0467626	0.0736707
10	0.18324	0.170074	0.301542	0.18853	0.390108	0.175243	0.469917	0.266966	0.223427	0.0971039	0.056	0	0.257883	0.208768	0	0.193487	0.121099	0.0395306	0.132021	0.141221
11	0.232361	0.332896	0.258906	0.20947	0.683532	0.0914474	0.439383	0.230769	0.130645	0.0789598	0.104997	0	0.374295	0.141108	0.0246705	0.222897	0.201429	0.0880347	0.111059	0.061499
12	0.30209	0.452552	0.39265	0.205891	0.852487	0.088947	0.622705	0.337342	0.105518	0.16767	0.156663	0	0.366817	0.0678708	0	0.165508	0.0877354	0.208515	0.291016	0.0373593
13	0.452824	0.395136	0.240839	0.230745	0.783966	0.14748	0.624051	0.395504	0.080292	0.158482	0.0487072	0	0.354312	0.127506	0	0.16714	0	0.0716482	0.262384	0.199795
14	0.399235	0.4141	0.410222	0.222778	0.775118	0.151634	0.57591	0.283997	0.173784	0.128408	0.1046	0.00962979	0.285458	0.185267	0	0.198987	0.0798692	0.108662	0.35058	0.252898
15	0.406752	0.275991	0.336675	0.266284	0.730139	0.0789826	0.577294	0.291693	0.114557	0.194705	0.0525015	0	0.407628	0.130387	0	0.215408	0.159374	0.0325348	0.387457	0.34995
16	0.284477	0.473297	0.365705	0.37325	0.871916	0.082544	0.814591	0.340078	0.0877817	0.0891239	0	0	0.366172	0.182068	0	0.247565	0.0387597	0	0.420155	0.329787
17	0.330426	0.485992	0.300877	0.500458	0.919603	0.182192	0.556273	0.109265	0.106834	0.0627962	0.0579078	0	0.540936	0.166852	0	0.322359	0.0787103	0.135737	0.412778	0.27998
18	0.291344	0.414497	0.475405	0.490537	0.787708	0.100749	0.631287	0.185479	0.150446	0.351265	0	0.074876	0.367382	0.161219	0	0.231169	0.110638	0.0706275	0.548751	0.393451
19	0.389073	0.432665	0.496179	0.451311	0.911074	0.140295	0.635326	0.130198	0.08393	0.470128	0.0511182	0.0844794	0.566016	0.18427	0.0296736	0.293416	0.085554	0	0.483313	0.349898
20	0.407089	0.319756	0.446626	0.471455	0.803638	0.25	0.332525	0.219124	0.0483997	0.360896	0.178264	0.0708259	0.542314	0.170106	0.0595369	0.292194	0.0973872	0.0691986	0.365905	0.296371
21	0.230688	0.387231	0.497173	0.483323	0.718009	0.291538	0.503759	0.159344	0.0388533	0.249476	0.107001	0.0794371	0.541349	0.170704	0.0645042	0.426307	0.130709	0.166723	0.328775	0.432137
22	0.297411	0.309641	0.427166	0.487125	0.872187	0.392879	0.5421	0.192667	0.108005	0.14943	0.0505181	0.0979222	0.549287	0.220023	0.0571327	0.458463	0.208948	0.0904836	0.613941	0.366791
23	0.370751	0.446281	0.382759	0.513007	0.570298	0.160813	0.642123	0.118217	0.0445232	0.122839	0.186554	0.0845101	0.583705	0.186942	0	0.321613	0.226562	0.126087	0.36545	0.264141
24	0.280287	0.30104	0.475103	0.503601	0.715999	0.211082	0.790033	0.157377	0.201327	0.287604	0.343525	0.0892938	0.504326	0.179137	0.0233981	0.463031	0.169661	0.112132	0.407442	0.490466
25	0.438577	0.238433	0.449373	0.262454	0.863343	0.309375	0.830796	0.237524	0.168452	0.276398	0.285369	0	0.573141	0.127343	0	0.407195	0.151468	0.0832	0.464421	0.458572
26	0.327688	0.390848	0.358098	0.374656	0.641802	0.228367	0.681752	0.225949	0.127834	0.255161	0.407323	0	0.657831	0.240401	0.0350467	0.421163	0.153619	0.0839818	0.489552	0.255096
27	0.429148	0.433506	0.288889	0.256252	0.694686	0.261255	0.732688	0.0847458	0.155523	0.195666	0.324201	0	0.634783	0.107598	0.081156	0.440949	0.113317	0.0285159	0.548611	0.223705
28	0.343267	0.376293	0.362194	0.267087	1	0.308886	0.676523	0.145171	0.100901	0.379686	0.384099	0	0.699309	0.18424	0.0752143	0.446557	0.21494	0.148867	0.446272	0.182344
29	0.291971	0.375654	0.251462	0.525747	0.85353	0.307799	0.732482	0.264528	0.115856	0.404878	0.387372	0.0840791	0.667287	0.197183	0.0431278	0.397347	0.175631	0.108596	0.411796	0.327904
30	0.36034	0.376246	0.267121	0.213527	0.835705	0.173587	0.764281	0.0837758	0.074223	0.407804	0.493834	0.0411612	0.616564	0.104887	0.0336851	0.383288	0.11962	0.0492177	0.32876	0.247812
31	0.270627	0.490981	0.296875	0.235404	0.914465	0.267655	0.705998	0.0818991	0.0625663	0.399873	0.487707	0	0.514963	0.189503	0.0333601	0.348599	0.23913	0.209211	0.424326	0.353005
32	0.323704	0.426649	0.295738	0.235808	0.848285	0.354701	0.524632	0.0499419	0.192224	0.359085	0.520222	0.0296198	0.642038	0.139934	0	0.432258	0.104967	0.127389	0.398776	0.310213
33	0.388931	0.387684	0.229231	0.235627	0.725683	0.410765	0.753689	0.125149	0.0971326	0.396947	0.497542	0.191963	0.742694	0.106704	0.105714	0.48092	0.30773	0.146317	0.424725	0.202597
34	0.273883	0.418446	0.261612	0.273691	0.847622	0.275125	0.748792	0.0442055	0.102479	0.302311	0.448111	0.0988438	0.6277	0.147702	0.171134	0.553383	0.314533	0.192948	0.415166	0.355568
35	0.328947	0.435974	0.301718	0.241118	0.789372	0.429421	0.65118	0.27518	0.150964	0.351508	0.382114	0.108418	0.649178	0.123846	0.155747	0.589838	0.227778	0.218925	0.523151	0.308017
36	0.288091	0.383952	0.335154	0.189512	0.800197	0.360057	0.614535	0.252608	0.17022	0.281883	0.477683	0.155853	0.486647	0.107709	0.126632	0.376644	0.223581	0.295795	0.549319	0.327886
37	0.370483	0.487247	0.28873	0.219813	0.860676	0.335086	0.690725	0.23186	0.0673203	0.192584	0.361434	0.0965665	0.659941	0.108036	0.100442	0.545598	0.218026	0.217628	0.501799	0.38645
38	0.394021	0.389661	0.364916	0.22031	1	0.361638	0.663982	0.309296	0.0530452	0.295696	0.332847	0.0937121	0.677324	0.230432	0.1389	0.421636	0.220635	0.233393	0.378656	0.513896
39	0.492849	0.313802	0.266293	0.449477	0.900031	0.313024	0.573764	0.214604	0.133653	0.154018	0.366251	0.131391	0.617473	0.192471	0.219036	0.353355	0.247599	0.376548	0.450653	0.408732
40	0.506504	0.316157	0.209094	0.309253	0.829815	0.406154	0.727346	0.319744	0.101112	0.216906	0.304207	0.021833	0.753909	0.201699	0.220466	0.384202	0.239674	0.148472	0.450234	0.472699
41	0.463072	0.33891	0.285452	0.276442	0.934679	0.503788	0.653157	0.262001	0.0471319	0.220814	0.42269	0.0117188	0.706189	0.194915	0.271761	0.426054	0.126333	0.25168	0.402771	0.371662
42	0.619779	0.29459	0.319286	0.305506	0.976148	0.414361	0.827454	0.128563	0.0673631	0.198325	0.425679	0.147145	0.718958	0.201717	0.26656	0.337381	0.17619	0.357143	0.284845	0.224242
43	0.442004	0.277731	0.317902	0.326972	0.931996	0.429091	0.876078	0.17069	0	0.162698	0.477987	0.15998	0.799377	0.141228	0.269885	0.459086	0.215792	0.402909	0.382578	0.35459
44	0.489312	0.243789	0.271281	0.353499	0.949003	0.352897	0.763412	0.252888	0.0879121	0.235055	0.428954	0.153295	0.681652	0.157549	0.227933	0.464735	0.0906217	0.565082	0.400922	0.377011
45	0.494009	0.287184	0.263871	0.249462	0.925939	0.26051	0.625094	0.179314	0.0973638	0.238933	0.392366	0.135821	0.736458	0.192661	0.260031	0.427163	0.25819	0.443195	0.55055	0.356273
46	0.478396	0.329879	0.269917	0.314417	0.938564	0.312896	0.731565	0.348552	0.0871627	0.31123	0.404804	0.186978	0.656423	0.187806	0.212926	0.406044	0.243784	0.288528	0.520065	0.409091
47	0.400938	0.319965	0.275758	0.335294	0.974624	0.346535	0.72767	0.224731	0.0440141	0.30961	0.331756	0.158581	0.721072	0.234607	0.212885	0.367679	0.177863	0.407211	0.463014	0.402238
48	0.425655	0.402887	0.27253	0.379334	0.971875	0.39725	0.772504	0.264112	0.0521647	0.334721	0.30593	0.253567	0.54949	0.152452	0.309202	0.358553	0.219647	0.444694	0.583805	0.603267
49	0.312141	0.345044	0.246887	0.338566	0.951729	0.389319	0.805328	0.286098	0.0998579	0.258555	0.236863	0.152433	0.690166	0.146341	0.314607	0.416082	0.0956175	0.397446	0.487486	0.59133
50	0.450437	0.312338	0.25128	0.351323	0.980306	0.282344	0.634232	0.254422	0.116271	0.180532	0.26594	0.138973	0.609799	0.167872	0.35409	0.350906	0.192853	0.381674	0.481622	0.678832
51	0.538344	0.332908	0.173668	0.36184	1	0.410763	0.539219	0.308166	0.072117	0.222345	0.185084	0.161402	0.682869	0.148033	0.317942	0.408141	0.170872	0.241163	0.42794	0.616446
52	0.321118	0.287997	0.172029	0.356461	1	0.318532	0.575	0.244553	0.0713256	0.215225	0.151754	0.0479721	0.605775	0.0566234	0.276948	0.335874	0.141243	0.267442	0.480608	0.446981
53	0.434684	0.309044	0.110201	0.357576	0.949206	0.31335	0.564608	0.209883	0.0397924	0.270978	0.236689	0.265804	0.678867	0.134921	0.314961	0.363383	0.122979	0.352011	0.345697	0.428497
54	0.510646	0.566542	0.239362	0.381589	0.876275	0.354237	0.65167	0.306301	0.0712644	0.154651	0.218687	0.430667	0.688679	0.0967909	0.264181	0.369939	0.124857	0.534757	0.453095	0.434286
55	0.488159	0.322822	0.237046	0.36717	0.91611	0.340291	0.712036	0.254164	0.0829635	0.0781923	0.285368	0.43772	0.600242	0.105839	0.27566	0.331425	0.122534	0.493787	0.399015	0.557453
56	0.484436	0.348613	0.265362	0.358168	0.914088	0.207934	0.584918	0.228619	0.0626866	0.050152	0.273341	0.246793	0.670662	0.290638	0.378479	0.223188	0.195122	0.285297	0.436634	0.685509
57	0.359107	0.458795	0.193297	0.348101	0.890132	0.309735	0.777248	0.235384	0	0.0422222	0.207981	0.128905	0.526189	0.256674	0.272764	0.240379	0.203317	0.23627	0.405504	0.6919
58	0.422705	0.452206	0.265401	0.366142	0.960116	0.55206	0.691092	0.367828	0.0472441	0.100924	0.293387	0.154582	0.546422	0.164615	0.199262	0.390869	0.281761	0.34037	0.240996	0.637598
59	0.376072	0.570892	0.202604	0.499634	0.966453	0.437647	0.716099	0.371505	0.0749753	0.155055	0.231394	0.185597	0.46369	0.254722	0.349349	0.379665	0.246231	0.332381	0.225449	0.653007
60	0.302648	0.595006	0.187168	0.349905	1	0.341824	0.70315	0.453867	0.11022	0.209677	0.228498	0.226477	0.632198	0.198198	0.32388	0.31197	0.157106	0.253726	0.20517	0.676175
61	0.326177	0.484018	0.295498	0.227019	0.972846	0.503195	0.689142	0.31415	0.0779258	0.0897984	0.1199	0.240238	0.637672	0.185845	0.352723	0.283444	0.131663	0.352182	0.330782	0.628674
62	0.327572	0.509659	0.190098	0.335583	1	0.472291	0.648276	0.376744	0.113571	0.149038	0.388628	0.293378	0.557576	0.205747	0.373116	0.400613	0.0809061	0.365541	0.353067	0.659651
63	0.391954	0.393855	0.232365	0.151847	0.943306	0.322874	0.590487	0.346852	0.142467	0.187115	0.207344	0.317468	0.531365	0.205627	0.357261	0.388831	0.0488294	0.208077	0.377438	0.557639
64	0.369295	0.361855	0.19437	0.214741	0.976992	0.517872	0.649647	0.383303	0.0898876	0.103297	0.24087	0.223943	0.543807	0.16219	0.444632	0.321954	0.0389696	0.478661	0.436105	0.536835
65	0.358804	0.34714	0.251615	0.279207	0.96246	0.405844	0.479902	0.470177	0.197976	0	0.174344	0.297484	0.529516	0.0997403	0.363943	0.394805	0.0468956	0.583718	0.395081	0.619308
66	0.446853	0.391338	0.218189	0.204651	0.948393	0.451349	0.578392	0.311828	0.191161	0.0666667	0.283945	0.165491	0.569926	0.217166	0.45679	0.44824	0.0720423	0.269913	0.30383	0.6
67	0.302562	0.306299	0.274662	0.268594	0.972742	0.490071	0.498214	0.487087	0.271807	0.153807	0.34375	0.224119	0.488044	0.222508	0.446371	0.293386	0.0392548	0.302227	0.483681	0.764579
68	0.312647	0.368106	0.178199	0.269869	1	0.384019	0.493189	0.319724	0.34412	0.257925	0.447005	0.311131	0.592503	0.217303	0.469363	0.295929	0.0490196	0.320015	0.333505	0.71831
69	0.31393	0.297565	0.275323	0.471811	0.851975	0.462528	0.568215	0.384578	0.264083	0.146704	0.416901	0.341486	0.597087	0.114139	0.321651	0.27794	0.154349	0.245401	0.322449	0.754864
70	0.298656	0.26368	0.174761	0.380306	0.904387	0.558587	0.528583	0.285106	0.294653	0.153846	0.387746	0.0702499	0.501208	0.146255	0.399375	0.379376	0.0513834	0.432348	0.294987	0.694933
71	0.297391	0.236884	0.144555	0.308731	0.82418	0.529776	0.404607	0.295181	0.227899	0.213444	0.345291	0.11681	0.326809	0.0631951	0.221134	0.33999	0.0501337	0.319034	0.199225	0.826341
72	0.293413	0.279503	0.25643	0.196984	0.815066	0.584838	0.511905	0.18191	0.278714	0.153982	0.467937	0.0695062	0.35107	0.168362	0.201913	0.202094	0	0.260455	0.300268	0.765957
73	0.300426	0.280986	0.279244	0.360332	0.838602	0.52	0.548926	0.431761	0.308132	0.236794	0.323748	0	0.484973	0.106114	0.149343	0.365586	0	0.209689	0.262321	0.734726
74	0.350507	0.413558	0.242896	0.286295	0.896401	0.569266	0.5978	0.411278	0.246365	0.299257	0.296264	0.0537511	0.536689	0.186874	0.215604	0.259276	0.0504775	0.164643	0.216075	0.632863
75	0.413344	0.318971	0.263158	0.263788	0.849296	0.466012	0.530537	0.410732	0.211926	0.27094	0.2482	0	0.40975	0.100295	0.27687	0.0619236	0.051574	0.248106	0.40613	0.791596
76	0.365377	0.257457	0.236117	0.191764	0.953771	0.554135	0.552161	0.228139	0.192141	0.173457	0.228461	0.0800821	0.452005	0.117188	0.211374	0.0993492	0.106029	0.162338	0.110087	0.782151
77	0.32085	0.424269	0.117647	0.17278	0.921532	0.36627	0.616667	0.24401	0.25	0.17038	0.214013	0	0.366589	0.108643	0.443932	0.145985	0.101429	0.2652	0.246637	0.842813
78	0.510387	0.316677	0.155199	0.239384	0.898183	0.533429	0.724356	0.199314	0.3036	0.205244	0.326539	0.0424383	0.492991	0.125061	0.187766	0.212729	0.0613718	0.118096	0.118913	0.884259
79	0.300364	0.315502	0.230973	0.0848485	0.921399	0.487558	0.501938	0.224894	0.402597	0.31979	0.303678	0.0340599	0.353942	0.240272	0.222154	0.261097	0.109818	0.199323	0.206856	0.838366
80	0.259101	0.258143	0.164336	0.0684932	1	0.464314	0.554638	0.269712	0.393852	0.3579	0.204012	0.0925422	0.402907	0.104543	0.198536	0.263317	0.0711238	0.133586	0.163537	0.608075
81	0.257625	0.243219	0.268979	0.212953	1	0.509327	0.503646	0.320746	0.332965	0.410626	0.206403	0	0.441331	0	0.201888	0.274475	0.0445205	0.26087	0.218507	0.748395
82	0.352312	0.246364	0.22291	0.129466	1	0.526638	0.620929	0.262239	0.341012	0.459392	0.17593	0	0.375573	0.0627144	0.203293	0.267801	0.188993	0.246603	0.134703	0.616372
83	0.451194	0.276099	0.123747	0.154859	0.928303	0.606635	0.650025	0.254054	0.294737	0.388161	0.171555	0	0.429329	0	0.151071	0.193037	0.145942	0.287379	0.199324	0.534676
84	0.191635	0.159627	0.228515	0.0781138	1	0.340845	0.684184	0.223301	0.318393	0.363986	0.133085	0.152876	0.440094	0.0633284	0.160341	0.0915673	0.106072	0.165941	0.103538	0.487275
85	0.237697	0.299188	0.161572	0.223479	0.964859	0.447059	0.714068	0.355863	0.47304	0.281964	0.166461	0.0305942	0.453078	0.0567341	0.174704	0.128992	0.0565611	0.269745	0.0917921	0.483681
86	0.301209	0.340766	0.290873	0.074799	1	0.405133	0.679374	0.235171	0.4935	0.296106	0.209184	0.0291971	0.552398	0.0657765	0.178798	0.0918281	0.112299	0.250619	0.335494	0.320148
87	0.277137	0.271773	0.253755	0.100972	0.940932	0.455292	0.588645	0.195109	0.434176	0.365843	0.137199	0.0884068	0.447709	0.0585899	0.18998	0.144604	0.0900369	0.189858	0.373521	0.322394
88	0.321929	0.337916	0.273555	0.0986501	0.976865	0.395131	0.505092	0.276956	0.468085	0.34287	0.0956159	0.213441	0.316763	0.0618908	0.154703	0.084753	0.0808157	0.136877	0.179415	0.316596
89	0.365089	0.306764	0.207288	0.0687603	0.954756	0.400376	0.416709	0.210152	0.464618	0.244924	0.137286	0.241334	0.377515	0	0.175	0.0938442	0.0953113	0.13509	0.188147	0.303859
90	0.279854	0.311792	0.206226	0.0800648	0.888676	0.419021	0.473051	0.22759	0.39478	0.253197	0.0884462	0.130548	0.379895	0.0676543	0.172578	0.0440359	0.150999	0.0561991	0.212741	0.28735
91	0.213496	0.351132	0.258851	0.0476958	0.899889	0.295276	0.442827	0.243784	0.424111	0.227025	0.138754	0	0.338895	0.0565578	0.17032	0.0433684	0.125561	0.0705831	0.227988	0.559796
92	0.33178	0.322425	0.264741	0.0632746	0.848956	0.292498	0.512807	0.235577	0.268527	0.194159	0.0405351	0	0.373806	0	0.120899	0.103434	0.193165	0.112069	0.303104	0.500952
93	0.40201	0.260585	0.251185	0.0637821	0.734555	0.277027	0.463008	0.202532	0.345395	0.192776	0.0571086	0	0.354802	0	0.135159	0.107357	0.171263	0.0998632	0.126004	0.388134
94	0.392236	0.237195	0.244461	0.207898	0.776692	0.213505	0.51709	0.165984	0.384071	0.232454	0.0665331	0.0244656	0.409396	0.123077	0.161974	0	0.24	0.2114	0.2458	0.414293
95	0.317988	0.273849	0.202001	0.148124	0.822876	0.220984	0.604747	0.266632	0.25348	0.220488	0.155137	0	0.37746	0.113092	0.150442	0	0.215137	0.0548755	0.28092	0.299129
96	0.347187	0.203471	0.222607	0.112265	0.814981	0.204831	0.616612	0.191702	0.344503	0.266667	0.0574572	0.0321765	0.368921	0.063285	0.243197	0	0.215765	0.109974	0.266386	0.2666
97	0.313947	0.295924	0.23795	0.133397	0.6673	0.233533	0.48238	0.197731	0.415056	0.209671	0.0349762	0.0236147	0.42831	0	0.210435	0.0482788	0.23913	0.101821	0.232205	0.384203
98	0.409091	0.159236	0.292504	0.124729	0.714517	0.228346	0.560414	0.405967	0.233831	0.201915	0.0357995	0	0.317365	0.0592384	0.126031	0.100166	0.251509	0.109183	0.287418	0.307176
99	0.27781	0.131987	0.23125	0.0860823	0.842204	0.361386	0.540033	0.225719	0.133655	0.255633	0.0649903	0	0.340451	0.20546	0.161041	0	0.170912	0.0881226	0.261146	0.38878
100	0.260779	0.286496	0.208696	0.146239	0.710834	0.404234	0.603382	0.344886	0.225511	0.0833688	0.0361685	0.0264151	0.352096	0.184993	0.166811	0	0.227582	0.118739	0.282817	0.458758
101	0.236216	0.218871	0.182643	0.155235	0.593266	0.533854	0.438095	0.404584	0.178256	0	0.0846774	0.0282676	0.32965	0.118605	0.23272	0.04806	0.249668	0.0768551	0.404558	0.352733
102	0.240836	0.206715	0.1917	0.182443	0.685039	0.567901	0.396951	0.29	0.203753	0.125975	0.0396983	0.0302436	0.308168	0.0668524	0.186963	0.0846934	0.133101	0.151474	0.478856	0.335434
103	0.22775	0.315143	0.0531873	0.185391	0.552521	0.500949	0.299292	0.309284	0.206484	0	0.0331492	0	0.357055	0.0730443	0.199266	0	0.142359	0.166446	0.219351	0.179812
104	0.22743	0.166906	0.207258	0.180338	0.768938	0.194584	0.297533	0.324902	0.272461	0.0979945	0	0	0.237893	0.123923	0.240634	0	0.315753	0.140695	0.374773	0.0931373
105	0.335757	0.0670836	0.129426	0.17433	0.71014	0.164835	0.340653	0.252427	0.0866142	0.0580777	0.0421546	0.13977	0.250597	0.174649	0.212667	0.055336	0.0909713	0.0621946	0.339782	0.39909
106	0.350883	0.0623391	0.191961	0.205864	0.490421	0.206897	0.323485	0	0.0488095	0.168623	0	0	0.265152	0.111598	0.208062	0.0686752	0.200828	0.0728177	0.267111	0.191034
107	0.408848	0.113796	0.0872401	0.21422	0.452065	0.350594	0.4	0.115965	0.0987362	0.171697	0.0396733	0	0.246984	0.129711	0.210208	0	0.165385	0.0564366	0.312655	0.198837
108	0.342668	0.10444	0.172443	0.189283	0.494879	0.52815	0.433071	0.218882	0	0.0785847	0.052212	0	0.305085	0.130226	0.232761	0	0.227658	0.080285	0.110675	0.193242
109	0.315481	0.143152	0.169739	0.16672	0.499629	0.474174	0.413999	0.193565	0	0.0470633	0.0507132	0.0268071	0.296149	0.105139	0.191406	0	0.304498	0	0.134027	0.30182
110	0.287491	0.152572	0.0758738	0.147176	0.481079	0.326693	0.428571	0.215768	0.0632613	0.037594	0.0485164	0.0569498	0.303911	0.0671882	0.183478	0.0539107	0.286191	0	0.0884442	0.393956
111	0.323979	0.161841	0.164579	0.161837	0.575937	0.231603	0.342205	0.260104	0.285956	0.0815155	0.0526951	0	0.400222	0.0753769	0.291606	0.0489389	0.252033	0.127863	0.0896255	0.191304
112	0.337746	0.242093	0.158943	0.214358	0.519807	0.314787	0.437926	0.227886	0.113254	0.108585	0	0	0.471864	0	0.159182	0.0981595	0.114306	0.0978311	0.208845	0.199539
113	0.376812	0.103854	0.210665	0.231105	0.579616	0.251238	0.552277	0.190844	0.263403	0.0738766	0.0525677	0	0.547293	0	0.168162	0	0.194969	0.0564784	0.348548	0.169811
114	0.296057	0.0448515	0.162357	0.1034	0.578459	0.180193	0.496935	0.204905	0	0.0817684	0.0199106	0	0.483536	0	0.1489	0	0.228404	0.198682	0.272832	0.115338
115	0.222615	0.0964037	0.205426	0.110345	0.608566	0.241967	0.403298	0.218886	0.0930678	0.078656	0.0424317	0.0841215	0.339265	0.0726676	0.138648	0	0.213545	0.0901246	0.343327	0.0563725
116	0.311799	0.183026	0.183155	0.241451	0.598039	0.379972	0.515304	0.269452	0.0499238	0.0394402	0.050861	0	0.307337	0.0559441	0.166522	0	0.366911	0.0840134	0.362821	0.10029
117	0.286797	0.171174	0.062308	0.27678	0.573796	0.293426	0.374312	0.302844	0.0982906	0	0.0475624	0	0.185625	0.0731707	0.205196	0	0.238427	0.138032	0.181522	0.118436
118	0.308685	0.264319	0.0790167	0.0955372	0.562704	0.355646	0.383764	0.296473	0.0786793	0	0.0168429	0	0.370111	0.0645765	0.169749	0	0.339844	0.09526	0.216955	0.12068
119	0.264018	0.451163	0.0649804	0.105177	0.673806	0.39205	0.453036	0.379607	0.197199	0	0.0313741	0	0.361013	0.0680241	0.242521	0	0.342015	0.158398	0.454387	0.210169
120	0.295066	0.371354	0.0637191	0.188885	0.568989	0.484743	0.195706	0.219952	0.22367	0.043299	0.0399845	0	0.346811	0.0719853	0.115896	0	0.309198	0.0710407	0.378721	0.110415
121	0.35081	0.306338	0.0657093	0.147202	0.610162	0.409928	0.322967	0.234951	0.080574	0	0.0392157	0	0.371512	0.0742278	0.156766	0	0.325714	0.0516279	0.291074	0.165901
122	0.326183	0.352259	0.0627998	0.150082	0.61878	0.376801	0.412822	0.294208	0.366299	0.0361446	0.0805085	0	0.216637	0.126437	0.213429	0	0.317241	0	0.403879	0.0446533
123	0.257288	0.0810164	0.0643564	0.194882	0.489498	0.422012	0.353562	0.313196	0.158505	0.0298947	0.0800924	0	0.246707	0.0646211	0.168475	0.0658571	0.16459	0.0551039	0.308713	0.0221823
124	0.126289	0.185451	0.065	0.318166	0.40116	0.482687	0.44657	0.275782	0.212257	0.05629	0.146522	0	0.227326	0.0590973	0.106964	0	0.384997	0.079947	0.313869	0.077784
125	0.213176	0	0.0704805	0.289905	0.689535	0.433355	0.563092	0.0505451	0.250924	0.0915342	0.103462	0	0.15549	0.0678042	0.140925	0.12394	0.314024	0.106364	0.123653	0.10018
126	0.215716	0.0275256	0.0586257	0.304244	0.563541	0.507581	0.336735	0.289086	0.384236	0.0273915	0.143819	0.0602122	0.304559	0.0731164	0.140443	0.04689	0.252839	0	0.174687	0.133141
127	0.201165	0.0344526	0.0472727	0.311134	0.606477	0.391866	0.329957	0.284128	0.320669	0.0253807	0.134746	0.0868984	0.273499	0.0744632	0.127565	0.0772574	0.221701	0	0	0.0658307
128	0.144597	0.0448485	0.0351986	0.294118	0.550241	0.408432	0.165475	0.147753	0.178411	0.0670732	0.0212595	0	0.193342	0.07399	0.107345	0.106815	0.183651	0	0	0.0693985
129	0.175973	0.101998	0.0395766	0.292392	0.501797	0.470242	0.302782	0.24849	0.126428	0.0333195	0.132282	0	0.252196	0.0698198	0.0806882	0	0.283176	0	0	0.120377
130	0.0831361	0.128372	0.056281	0.312256	0.494176	0.402676	0.215062	0.166902	0	0.0663587	0.0761301	0	0.274876	0.0749436	0.113432	0.0407478	0.20684	0	0	0.0850316
131	0.0856401	0.105575	0.0583908	0.27289	0.442124	0.407666	0.237789	0.288726	0	0.0390824	0.126367	0	0.301361	0.0635786	0.111981	0.079396	0.234334	0	0.110742	0.0977496
132	0.0782734	0.174672	0.0173042	0.269395	0.407084	0.365953	0.409283	0.35175	0.0855365	0.0341734	0.12796	0.0605642	0.198427	0.0658251	0.128541	0.16839	0.246162	0	0.0990433	0.0370117
133	0.138453	0.109006	0	0.271567	0.475615	0.257516	0.29859	0.163068	0.0560748	0	0.145016	0	0.143772	0.0662403	0.0964833	0.104657	0.232223	0.0201973	0	0.0349206
134	0.165545	0.181256	0.0216138	0.224526	0.466758	0.268264	0.395225	0.16238	0.124559	0	0.226423	0	0.277814	0.0631769	0.203854	0.124413	0.336396	0.0527534	0	0.106297
135	0.122081	0.118572	0.119848	0.234873	0.235853	0.283523	0.347556	0.157995	0	0	0.108174	0	0.215772	0.0696087	0.125942	0.103465	0.300581	0.0879808	0.277819	0.198653
136	0.130872	0.0568281	0.0136861	0.165348	0.386612	0.302392	0.396055	0.180684	0.28389	0	0.0828772	0	0.162055	0.0681818	0.175038	0.0563515	0.271143	0.185254	0.049936	0.0778761
137	0.0953837	0.0666476	0.0421053	0.129657	0.279185	0.236471	0.254601	0.185869	0.10963	0.0332673	0.0574257	0	0.212349	0.0799265	0.199753	0.0788201	0.15082	0.16221	0.123127	0
138	0.126782	0.0639452	0	0.168821	0.380333	0.233866	0.191915	0.0302326	0.271632	0.0414922	0.091086	0	0.196927	0.0796253	0.197957	0.0859223	0.157867	0.13442	0.127457	0.0933108
139	0.0904776	0.100494	0.0326493	0.0861561	0.22141	0.338795	0.179008	0.0637907	0.109007	0.0542462	0.0610746	0	0.104437	0.148354	0.159581	0.029822	0.157692	0.20523	0.193608	0.0298507
140	0.0930024	0	0.0378505	0.104243	0.29882	0.133106	0.29272	0.0328317	0	0	0.0837716	0	0.122657	0.0678754	0.183529	0.0427729	0.0587024	0.148666	0.269424	0.0307951
141	0	0	0.0518061	0.106884	0.320973	0.214326	0.298158	0.0259681	0	0.0387025	0.062963	0	0.152361	0.0726612	0.239166	0.0655898	0.0607708	0.135257	0.1875	0.0362663
142	0	0.0498985	0.0297952	0	0.334291	0.217152	0.238627	0	0.05671	0.0423949	0.0580973	0	0.125934	0.0724438	0.191271	0.0373098	0.0731707	0.232291	0.0835972	0.179472
143	0	0.0327131	0.0985245	0.0424265	0.235326	0.332341	0.282547	0.0854888	0.0467811	0	0.0444361	0	0.101045	0.118597	0.0496815	0.0317538	0	0.0408074	0.288793	0.0415134
144	0.0553429	0	0.0612722	0.0605825	0.199897	0.362668	0.251986	0.145463	0	0	0.0470016	0.0612951	0.0709677	0.0723961	0.157433	0.07846	0.158421	0.138654	0.083383	0.215254
145	0.0920897	0	0.0427553	0.127635	0.35	0.18847	0.115183	0.0753198	0	0.0434439	0.097891	0	0.207456	0.0658879	0.129854	0	0.0715778	0.0544098	0.0894569	0.0578831
146	0	0	0.0336862	0.054769	0.415698	0.254218	0.156826	0.0528889	0	0.0515904	0.0863655	0	0.234104	0.061959	0.152773	0.108739	0.0865936	0.0380245	0.0620774	0.112717
147	0	0.0893921	0.0381232	0.0973797	0.368466	0.253681	0.118849	0.0913636	0	0.0555768	0.0579604	0.107163	0.210744	0	0.112816	0	0	0.0477408	0.0430438	0.204465
148	0	0	0.0156171	0	0.573352	0.262685	0.114754	0	0.0768592	0.0493409	0.0473506	0	0.204928	0.0717222	0.199676	0.030572	0.0624685	0.0967462	0	0.0691358
149	0	0	0.0829832	0.084998	0.478154	0.288306	0.169851	0.0541072	0	0.0490232	0.0607755	0	0.145356	0.126187	0.111776	0.0437186	0	0	0.0378634	0.0810988
150	0	0	0.106667	0.199533	0.451292	0.353264	0.0595888	0	0.0369618	0	0.0693537	0	0.101767	0.0520548	0	0.0826572	0.175351	0	0.0805886	0
151	0	0.0653341	0.0838646	0.221039	0.550962	0.368706	0.121121	0.0903166	0.0579588	0	0.065516	0	0.0726832	0	0.0665167	0.0554169	0	0.0623269	0	0.0823151
152	0	0.116203	0.0944689	0.179975	0.526892	0.415074	0.0931006	0.0832527	0	0.0483441	0.0779817	0	0.180871	0.0398148	0	0.0339069	0	0.0687606	0	0.139691
153	0.0608724	0.108534	0.0357863	0.185833	0.367357	0.324153	0.0577835	0.152771	0	0.0331934	0.0424284	0	0.312422	0	0.0551156	0.0399803	0	0.0813239	0	0.102594
154	0	0.193655	0.0770823	0.18829	0.400742	0.315128	0.186614	0.137536	0	0.0276283	0.0502618	0.0738385	0.294955	0	0.0891277	0.0995498	0	0	0	0.0275284
155	0.0524272	0.323642	0.095666	0.185419	0.318138	0.359474	0.250692	0	0	0	0.0398027	0	0.247312	0	0.0291708	0.0634518	0.0349684	0	0	0
156	0.0732422	0.205804	0.0474138	0.218526	0.376735	0.335958	0.216692	0.0701021	0	0	0.0341023	0	0.312421	0.0708955	0	0.118389	0	0	0	0.0424354
157	0.216464	0.256456	0.0475162	0.21303	0.343376	0.303734	0.0585586	0.119905	0	0	0.041481	0.05076	0.242079	0.0729893	0.0886248	0	0	0	0	0.0336943
158	0.246656	0.17552	0.0661111	0.201846	0.295748	0.299732	0.12232	0.0720514	0	0	0.0284211	0	0.149291	0.13973	0	0.0450589	0	0.0863341	0	0.0994441
159	0.138745	0.11153	0.108475	0.237171	0.342396	0.3036	0.105729	0.100463	0	0	0.0515901	0	0.132832	0.0624413	0.062543	0.0873096	0	0.0973882	0	0.103527
160	0.0632334	0.156584	0.0380901	0.299956	0.51075	0.244216	0.0470538	0.0755729	0	0	0.104122	0.0347512	0.114268	0.0832937	0.0840249	0.157143	0	0.038009	0	0.0509383
161	0.0635226	0.0395913	0.134423	0.208007	0.498789	0.246399	0.0206926	0.0642202	0.0861101	0.0335937	0.0432624	0.0404594	0.157704	0.0718232	0	0.096841	0	0.0930431	0.0518417	0.0643828
162	0	0.0543234	0.0640129	0.197444	0.391489	0.225654	0	0.129779	0	0	0.0262069	0	0.150828	0.132435	0	0.0652975	0	0.0599676	0	0.107922
163	0.0708738	0.0528801	0	0.19627	0.458253	0.231714	0	0.10104	0	0	0.0589698	0.0515737	0.152992	0.145843	0.0547264	0.119433	0.0378038	0.0503273	0	0.181034
164	0.0642557	0.0455797	0.0698052	0.191619	0.542089	0.237297	0	0.153773	0	0	0.0275198	0	0.150599	0.23	0	0	0.0370036	0.116232	0	0.182478
165	0.0673014	0.13169	0.0789177	0.158558	0.484579	0.416459	0.028021	0.0512367	0	0	0.0566294	0.0417762	0.192741	0.195579	0	0.0356068	0	0.0520161	0.0930556	0.0917327
166	0.0689097	0	0.0553267	0.154561	0.531539	0.338292	0	0.10924	0	0.0614203	0.0257365	0	0.180025	0.212063	0	0.0425213	0	0.060778	0	0.0671729
167	0.0641711	0	0.0838672	0.181383	0.533093	0.324298	0	0.131671	0	0	0.0249916	0	0.150702	0.225543	0	0.0583756	0	0.0211468	0.0499638	0
168	0	0	0.0945105	0.239875	0.379649	0.2589	0.0542089	0.10559	0	0.0414763	0.0245114	0	0.138838	0.120127	0.140187	0.201135	0	0.153969	0.0495196	0.0729412
169	0.168787	0	0.0282609	0.16366	0.65045	0.352442	0.05103	0.0539097	0	0	0.0357498	0	0.140187	0.213699	0.0938329	0.170732	0	0.101695	0.11997	0.0876351
170	0.256779	0.0797721	0.107123	0.149146	0.527505	0.320988	0.0666667	0.0309041	0.0371983	0.0556971	0.0363276	0	0.248153	0.25761	0.153689	0.181865	0.0429952	0.0961207	0	0.0381062
171	0.222812	0.0734892	0.0889409	0.173742	0.476549	0.346893	0	0	0	0.0450715	0.045	0	0.157828	0.103872	0.0835801	0.173285	0	0.0581986	0.0594679	0
172	0.119024	0.116258	0.116086	0.236707	0.48522	0.267927	0.0771855	0.037037	0	0.0484171	0.0248691	0	0.15132	0.260336	0.12089	0.181253	0	0	0	0
173	0.101153	0.122411	0.0551839	0.204925	0.435315	0.274939	0	0.0430153	0	0.0452354	0.0232633	0	0.119157	0.0998553	0.0917956	0.126562	0	0.0682819	0	0
174	0.109195	0.124164	0.0700496	0.072493	0.472812	0.31769	0.206494	0.053542	0	0.045283	0.0152202	0	0.153242	0.140825	0.0892034	0.149371	0.0421716	0.0744636	0	0.111931
175	0	0.212142	0.0911136	0.165303	0.552695	0.238768	0.152735	0	0	0	0.0545217	0	0.148771	0.113658	0.0898987	0.121375	0.0438513	0	0	0.126238
176	0	0.155412	0.0466189	0.20409	0.425083	0.25935	0.087766	0	0	0.0280553	0.054872	0	0.115971	0.160639	0.144673	0.0282065	0.046309	0.0591659	0.0989194	0
177	0.0516322	0.12841	0.0836257	0.172782	0.478279	0.388188	0.0792873	0.0327654	0	0.0451215	0.0292378	0	0.117123	0.120601	0.150937	0.0884097	0	0	0.0602116	0
178	0.142332	0.202922	0.0615385	0.135481	0.513271	0.345648	0.0854626	0.0564444	0	0.0313492	0.0453306	0	0.173118	0.0509346	0.139803	0.0542677	0.0425729	0	0.0919732	0
179	0.0664418	0.208333	0.0785797	0.118493	0.498531	0.348748	0.0889284	0.0594452	0	0.0352141	0.133745	0	0.166078	0.197473	0.199095	0.0476448	0.0466445	0.0304735	0.0455655	0.0683863
180	0.129212	0.146711	0.0447059	0.182979	0.482217	0.303486	0.138963	0.0646573	0	0	0.130895	0	0.135828	0.242095	0.144728	0.119124	0	0.018596	0.0477346	0.0717703
181	0.0470348	0.15747	0.0500874	0.165675	0.460532	0.322638	0.197469	0.0608529	0.06914	0.0699605	0.198516	0	0.110661	0.122098	0.163829	0.108311	0	0	0.0460905	0.158122
182	0	0.0538605	0.0938567	0.192308	0.444683	0.294118	0.189394	0.0501672	0	0.0639159	0.0558539	0	0.151084	0.118949	0.139212	0.108954	0	0.0831142	0	0.175055
183	0	0.0640197	0.0763697	0.139516	0.502695	0.21315	0.137668	0.0538272	0	0.0330547	0.0747395	0	0.153378	0.0453118	0.128778	0.0522067	0.0418233	0.113265	0.0557377	0.208607
184	0.0447903	0.0758089	0.10749	0.242665	0.432968	0.0711207	0.139785	0.111386	0	0	0.0107373	0	0.180295	0.112254	0.0967136	0.20528	0.0291829	0.131476	0.109285	0.0715096
185	0	0.110572	0.118176	0.171839	0.466201	0.0934363	0.0846638	0.111391	0	0	0.0292241	0	0.226994	0.206623	0.126247	0.106522	0.0378937	0.074973	0.0473029	0.100058
186	0.0420141	0	0.097622	0.257066	0.546791	0	0.179728	0.0973783	0	0	0.0216655	0	0.204499	0.129344	0.14661	0.281813	0	0.0760357	0	0.0858453
187	0.0658436	0.0614849	0.110706	0.160911	0.477032	0	0.205435	0.0967565	0	0.0402488	0.036833	0	0.115232	0.200998	0.131942	0.0253968	0	0.0601901	0.0945395	0.0569977
188	0.0423515	0	0.0821449	0.318182	0.517857	0	0.207507	0.0917582	0	0.0869066	0.08442	0	0.20082	0.205277	0.136292	0.160994	0	0	0.0652699	0.0709579
189	0	0.0559303	0.0967933	0.178725	0.452421	0	0.175512	0.136339	0	0.0641509	0.0397124	0.0493969	0.188835	0.187054	0.135897	0.106949	0	0	0	0.128958
190	0.133525	0.0580357	0.0675444	0.140696	0.498943	0.118656	0.102104	0.117904	0.0590278	0.0795012	0.0722071	0	0.222834	0.270701	0.135474	0.145425	0	0	0.0611111	0.175355
191	0.134565	0	0.0675597	0.108957	0.51666	0	0.0964646	0.0499719	0	0.108919	0.0391231	0	0.218093	0.169141	0.144514	0.131808	0	0.0525518	0	0.162912
192	0.0970199	0.0351673	0.134838	0.10997	0.40818	0	0.1035	0.103632	0	0.0756988	0.0256924	0.0738215	0.164969	0.236111	0.11848	0.0760171	0	0.0339929	0	0.0740093
193	0.0712621	0.0949246	0.144936	0.0652615	0.462803	0.060276	0	0.146434	0	0.0638978	0.023794	0.0318599	0.290795	0.17005	0.137287	0.0893617	0.0255255	0.0650948	0	0.140351
194	0.147413	0.124544	0.116923	0.181855	0.428167	0.100472	0.03485	0.114153	0	0.0962087	0.0325016	0.0287403	0.15395	0.177244	0.139182	0.108614	0.0273644	0.0265	0.127743	0.166071
195	0.103951	0.170351	0.108763	0.0882714	0.476485	0	0	0	0	0.0709076	0.0353519	0	0.286667	0.21796	0.115922	0.175589	0	0.029822	0.101931	0.135135
196	0.0436893	0.169966	0.0733945	0.168294	0.478518	0.0491694	0	0.0425974	0	0.0709677	0.028169	0	0.341216	0.173418	0.0669511	0.172432	0	0.0808893	0.122671	0.0831909
197	0.115817	0.138684	0.0699816	0.14359	0.511941	0.171647	0	0.112378	0	0.107764	0.0372124	0	0.263194	0.180291	0.0828895	0.0732759	0	0.0413625	0.123019	0.162342
198	0.0671791	0.245395	0.137326	0.193398	0.430904	0.137117	0	0.217619	0.0817243	0.0633333	0.0332654	0.0364668	0.300813	0.230242	0	0.137987	0.0265	0.024512	0.157935	0.065513
199	0.0731374	0.203012	0.0758377	0.135573	0.39167	0.0471204	0	0.172991	0	0.109505	0.0441176	0	0.258295	0.0459509	0	0.17319	0	0	0.115413	0.0651221
200	0.0699349	0.15954	0.0486518	0.131622	0.409196	0.0264201	0	0.17288	0	0.114298	0.0336106	0.0593952	0.291613	0.0509408	0	0.212513	0	0.0669111	0.276065	0.0517346
201	0.136489	0.117612	0.12058	0.133648	0.44645	0	0.0300885	0.122306	0.0276517	0.0859167	0.0176667	0	0.186928	0.236564	0	0.197872	0.0703686	0.107062	0.0949275	0
202	0.17119	0.120159	0.0805489	0.160563	0.47812	0.0201638	0.0394004	0.285175	0	0.0424794	0.0328669	0	0.233042	0.114623	0.0707846	0.129863	0.137881	0.133208	0.167401	0.110281
203	0.206327	0.0608295	0.102888	0.183055	0.428571	0	0.107253	0.138875	0.0270825	0.0565022	0.0134868	0.0173669	0.224082	0.120983	0.0331214	0.1184	0.0307933	0.0369318	0.106887	0.0521739
204	0.148385	0.20923	0.0751654	0.223134	0.315729	0.0459849	0.0866817	0.147303	0.0689791	0.0560404	0.0152976	0.0274758	0.25228	0.152122	0.0817133	0.123208	0.0462338	0.120681	0.220881	0.123894
205	0.151808	0.318126	0.0745074	0.255733	0.298127	0	0.0751498	0.230689	0.0867367	0.0621415	0.0217683	0.018156	0.129838	0.126241	0	0.0998407	0.0918114	0.0528736	0.255109	0.0453225
206	0	0.383678	0.0626536	0.221065	0.309018	0.0817039	0.0773245	0.214323	0.138912	0.0500459	0.0221923	0	0.125989	0.128518	0.0402355	0.0955145	0.0853127	0.0791168	0.141905	0
207	0	0.195836	0.0889474	0.236905	0.295997	0.0833333	0.0557674	0.174787	0	0.0687382	0.0418176	0.0172707	0.18271	0.114937	0	0.0376658	0.109616	0.0273843	0.216273	0.0390764
208	0.0750947	0.121593	0.0699541	0.265773	0.249406	0.115702	0.067299	0.189052	0	0.0358322	0.0706941	0.0806967	0.122166	0.176306	0	0.0810526	0.0834176	0	0.171468	0
209	0	0.179834	0.0587903	0.145251	0.329525	0.0875	0.0658879	0.267179	0.084684	0.0333824	0.0608838	0.15024	0.137306	0.172702	0	0.108395	0.135519	0	0.200397	0
210	0.0706971	0.144462	0.111509	0.177432	0.32356	0.110394	0.174119	0.220871	0	0.0322266	0.0613802	0.0821122	0.236453	0.179765	0.033697	0.125668	0.0584767	0.0580087	0.17141	0.0647572
211	0	0.201615	0.112736	0.164687	0.280689	0	0.0317604	0.232776	0.100442	0.0365915	0.0321368	0.0332287	0.131098	0.123611	0.0359595	0.0367261	0.0763322	0.0690265	0.135942	0.114577
212	0	0.141147	0.130695	0.147373	0.253419	0.022742	0.0759091	0.184339	0.158868	0.0679901	0.143385	0.0345109	0.134846	0.104408	0	0.130591	0.119549	0.0673832	0.188358	0
213	0.150063	0.38144	0.0944785	0.202331	0.356881	0.0426789	0.0338433	0.245763	0	0.0704501	0.118105	0.0961223	0.0986801	0.104081	0.0370968	0	0.121118	0	0.191446	0
214	0.259212	0.118473	0.0670927	0.23228	0.310384	0.11541	0.194799	0.149583	0	0.0337395	0.0895376	0.0938113	0.166667	0.18	0	0.143528	0	0	0.319407	0.0743282
215	0.209688	0.199443	0.0838548	0.18824	0.402799	0	0.185112	0.278785	0	0.0900519	0.15	0.093435	0.104222	0.136744	0	0.139619	0.0701938	0.0575157	0.275531	0.0889488
216	0.226773	0.231644	0.118454	0.185251	0.4453	0	0.0387524	0.19476	0	0.0316132	0.0521075	0.04668	0.101804	0.0492794	0.0270903	0.117168	0.08101	0.0747992	0.296496	0.113535
217	0.106631	0.192466	0.0601685	0.138164	0.344209	0	0.0816619	0.181908	0	0.114843	0.198967	0.0240609	0.123046	0.0990237	0	0.116983	0.044317	0.197241	0.157723	0.092603
218	0.057971	0.113242	0.0430365	0.219215	0.374089	0.0253521	0.109727	0.246384	0	0.0332734	0.184532	0.0571569	0.183594	0.150369	0	0.124084	0.0797792	0.0307549	0.0421456	0.127389
219	0.240943	0.194682	0.0912409	0.274143	0.340824	0.064538	0.115583	0.328927	0	0	0.154953	0.0384942	0.162433	0.20629	0	0.0648051	0.0956215	0.0433905	0.0588235	0.0406644
220	0.165318	0.343236	0.109432	0.272017	0.358185	0.0175809	0.203998	0.187793	0.068564	0	0.205607	0	0.16875	0.160167	0	0.0666667	0.0792839	0.0416876	0.0376119	0.0337268
221	0.106113	0.217076	0.0706692	0.30888	0.313002	0	0.137135	0.253382	0	0.08	0.272629	0.0310235	0.145965	0.154773	0.0353602	0.0414534	0.105076	0.0483473	0.0904325	0.0604678
222	0.121096	0.184855	0.16129	0.264832	0.196728	0.0454237	0.172529	0.306667	0	0.038874	0.155492	0.0882621	0.0981912	0.104393	0	0.0638733	0.0885496	0	0.0472103	0.0666259
223	0.0725608	0.149673	0.0756881	0.275326	0.153569	0.0455472	0.050515	0.347921	0	0.0997743	0.103315	0	0.102445	0.17412	0.0349815	0	0.042735	0.0534351	0.084118	0.168598
224	0.0520472	0.170671	0.0586812	0.251031	0.24208	0.0895522	0.066988	0.367209	0	0.113346	0.110798	0.0527959	0.196839	0.203268	0.0395137	0.0341515	0.0958549	0.138915	0	0.0849443
225	0	0.177504	0.249686	0.359968	0.10956	0.0434183	0.153431	0.385011	0	0.0977242	0.210099	0.0282962	0.105929	0.193314	0	0	0.0508287	0.107636	0.117254	0.139549
226	0.0686695	0.262524	0.171572	0.390196	0.111915	0	0.122302	0.289742	0.0425981	0.102916	0.0960854	0	0.164566	0.277482	0.0697345	0	0.0922996	0.0907497	0.0733945	0.13795
227	0.0680702	0.178674	0.152919	0.381484	0.106626	0.0657627	0.154203	0.242188	0	0.0355156	0.0940359	0	0.148026	0.156403	0.0397422	0.0476939	0.0981405	0.149068	0.0730878	0.0747018
228	0.114255	0.123167	0.186269	0.301894	0.0974111	0.121086	0.111111	0.0640871	0	0.029399	0.184582	0.0852488	0.114386	0.157484	0	0	0.0951363	0.194036	0.13945	0.129855
229	0.191113	0.110178	0.0425287	0.328609	0.108686	0.113221	0.115364	0.209472	0	0	0.128504	0.0668237	0.213444	0.274306	0	0.0495471	0	0.201637	0.0738535	0.154613
230	0.249631	0.271688	0.172671	0.37476	0.0995069	0.0547196	0.140815	0.139605	0	0.0277537	0.210049	0	0.227961	0.199309	0	0.0881732	0.0787234	0.0652361	0.123798	0.0905091
231	0.307976	0.181517	0.171666	0.385062	0.200092	0.160055	0.0613682	0.0816935	0	0.0245009	0.079611	0.0743148	0.12049	0.193992	0	0.0766807	0.0816098	0.0885702	0.0431349	0.13548
232	0.196487	0.0952532	0.186548	0.401503	0.114472	0.134816	0.0563029	0.137582	0	0.0427158	0.0719858	0	0.0752909	0.242501	0	0.0495612	0.0521739	0.0307492	0.0445122	0.09006
233	0.13741	0.269606	0.203283	0.396646	0.162306	0.0769231	0.116917	0.197835	0	0.0321716	0.0931963	0.0390928	0.0348432	0.179641	0	0.112091	0	0.0736142	0.135723	0.0414966
234	0.0507092	0.257916	0.197858	0.387656	0.0614871	0.0466926	0.0497925	0.0960048	0	0.0614426	0.137129	0.0387571	0.209254	0.100595	0	0.102857	0	0.068018	0.193036	0.128062
235	0.117254	0.272546	0.204356	0.260101	0.0623819	0.046	0.194501	0.145122	0	0.0587189	0.078991	0.0183762	0.176354	0.0907288	0.0397422	0.104013	0.107538	0.0340543	0.129816	0.119031
236	0.120184	0.322485	0.193974	0.214164	0.12047	0.0211172	0.0513514	0.0929526	0	0.0566202	0.0857049	0.0247244	0.0427236	0.182184	0	0.0541401	0	0.0705009	0.138406	0.0403168
237	0.064632	0.145083	0.182458	0.274221	0	0.0972685	0.0697674	0.164894	0	0	0.0860884	0.0826287	0.0757162	0.223281	0	0.027027	0.229167	0.0908285	0.104567	0.0505415
238	0.115653	0.268849	0.225964	0.188504	0.0673401	0.144269	0.0476689	0.118925	0	0.0589219	0.0708635	0.0315709	0.0668896	0.146654	0.0450387	0	0.0670478	0.0419269	0.19732	0.0474479
239	0.101813	0.136932	0.224051	0.0533104	0	0.0477839	0	0.0215664	0	0.0408341	0.0831378	0.0610599	0.0645161	0.23073	0.0270963	0	0	0	0.135118	0

## Sheet: 2F
Timeseries (top)					Phase Space (bottom)
Time (min)	EGFRp	EGF_EGFR			Time (min)	EGFRp(t)	EGFRp(t+d)	EGFRp(t+2d)
0	0.0852629	-0.000501368			0	0.108841	0.794544	0.730277
1	-0.00165385	-0.000104722			1	0.0274576	0.669937	0.775381
2	-0.00508658	-0.00038256			2	0.0221363	0.694948	0.760706
3	-0.0195572	-0.00039117			3	-0.0212921	0.68615	0.745884
4	-0.0589653	0.00137982			4	-0.137143	0.76563	0.59711
5	0.230432	0.0126997			5	0.202582	0.6917	0.608792
6	0.366056	0.0239299			6	0.371069	0.588439	0.648925
7	0.488328	0.0338681			7	0.488301	0.688438	0.611135
8	0.521035	0.0403477			8	0.516467	0.719442	0.594009
9	0.58062	0.0486795			9	0.540092	0.557561	0.473776
10	0.563034	0.0545482			10	0.556786	0.542692	0.520387
11	0.542641	0.060384			11	0.542309	0.478738	0.626868
12	0.633215	0.0638709			12	0.624684	0.469502	0.569652
13	0.594845	0.0690391			13	0.586554	0.602776	0.541129
14	0.706392	0.0719905			14	0.691499	0.684631	0.549487
15	0.642195	0.0745683			15	0.637051	0.700338	0.545511
16	0.706321	0.0779531			16	0.695661	0.610957	0.535693
17	0.833413	0.0825701			17	0.789374	0.640261	0.576572
18	0.82326	0.0841864			18	0.822878	0.966912	0.476136
19	0.791318	0.0850639			19	0.779695	0.556041	0.50868
20	0.832986	0.0878271			20	0.814013	0.700476	0.65136
21	0.828327	0.0871714			21	0.823496	0.955263	0.593507
22	0.708437	0.0851557			22	0.695131	0.96046	0.593639
23	0.728489	0.0904539			23	0.73405	0.863917	0.486647
24	0.709876	0.0898531			24	0.706252	0.933342	0.46475
25	0.597303	0.0852919			25	0.605215	0.954663	0.366005
26	0.662485	0.0871806			26	0.6548	1	0.563485
27	0.753499	0.0896159			27	0.7467	0.980966	0.608538
28	0.703337	0.0868876			28	0.700786	0.944452	0.580998
29	0.725163	0.0903346			29	0.718213	0.87656	0.422776
30	0.716692	0.0897068			30	0.708413	0.795716	0.230345
31	0.738443	0.0853925			31	0.720627	0.77694	0.281332
32	0.706563	0.0873537			32	0.709811	0.759082	0.129308
33	0.8009	0.0885693			33	0.794544	0.730277	0.241151
34	0.662576	0.0874483			34	0.669937	0.775381	0.269112
35	0.699686	0.085534			35	0.694948	0.760706	0.167608
36	0.685239	0.0858435			36	0.68615	0.745884	0.130797
37	0.779424	0.0927185			37	0.76563	0.59711	0.186747
38	0.693504	0.0921766			38	0.6917	0.608792	0.0379339
39	0.608727	0.0868809			39	0.588439	0.648925	0.0311915
40	0.679146	0.0910655			40	0.688438	0.611135	0.000335945
41	0.716764	0.0942173			41	0.719442	0.594009	0.109214
42	0.556734	0.0873536			42	0.557561	0.473776	0.233055
43	0.541169	0.0883764			43	0.542692	0.520387	0.151053
44	0.484969	0.0884513			44	0.478738	0.626868	0.205579
45	0.491891	0.0896917			45	0.469502	0.569652	0.102264
46	0.780973	0.0884916			46	0.602776	0.541129	0.170709
47	0.710857	0.0889955			47	0.684631	0.549487	0.108583
48	0.741343	0.0885636			48	0.700338	0.545511	0.293905
49	0.604005	0.0883308			49	0.610957	0.535693	0.108992
50	0.737864	0.0874719			50	0.640261	0.576572	0.231433
51	0.962902	0.0879523			51	0.966912	0.476136	0.143142
52	0.538568	0.0822708			52	0.556041	0.50868	0.337909
53	0.690302	0.0823347			53	0.700476	0.65136	0.48972
54	0.962737	0.0847938			54	0.955263	0.593507	0.450941
55	0.967471	0.0933149			55	0.96046	0.593639	0.429823
56	0.830444	0.0913872			56	0.863917	0.486647	0.371739
57	0.920537	0.0958229			57	0.933342	0.46475	0.144474
58	0.953759	0.0967218			58	0.954663	0.366005	0.297112
59	1	0.1			59	1	0.563485	0.0822291
60	0.987696	0.0949319			60	0.980966	0.608538	0.113282
61	0.956525	0.0929635			61	0.944452	0.580998	0.0955509
62	0.877444	0.093267			62	0.87656	0.422776	0.111896
63	0.79724	0.0913299			63	0.795716	0.230345	0.0963397
64	0.759746	0.0936068			64	0.77694	0.281332	0.0679107
65	0.758782	0.0936269			65	0.759082	0.129308	0.0357982
66	0.786805	0.0931283			66	0.730277	0.241151	0.168087
67	0.776507	0.0804244			67	0.775381	0.269112	0.153997
68	0.751856	0.0865158			68	0.760706	0.167608	0.0695628
69	0.747265	0.086198			69	0.745884	0.130797	0.0377634
70	0.624346	0.07446			70	0.59711	0.186747	-0.135678
71	0.614971	0.0697982			71	0.608792	0.0379339	-0.0216066
72	0.685783	0.0693482			72	0.648925	0.0311915	-0.0401393
73	0.617576	0.0584871			73	0.611135	0.000335945	0.00170585
74	0.570753	0.0541395			74	0.594009	0.109214	-0.0738658
75	0.447236	0.0514044			75	0.473776	0.233055	-0.0383416
76	0.508747	0.0468598			76	0.520387	0.151053	-0.0503515
77	0.642945	0.0498686			77	0.626868	0.205579	-0.0511678
78	0.574852	0.0495198			78	0.569652	0.102264	-0.0237295
79	0.541874	0.0469512			79	0.541129	0.170709	-0.104815
80	0.547113	0.0459386			80	0.549487	0.108583	-0.10832
81	0.559876	0.0516105			81	0.545511	0.293905	-0.00136934
82	0.546116	0.0464241			82	0.535693	0.108992	0.0249956
83	0.563435	0.0446801			83	0.576572	0.231433	0.104005
84	0.467926	0.0460516			84	0.476136	0.143142	0.0583181
85	0.502358	0.0407258			85	0.50868	0.337909	0.108217
86	0.642763	0.042465			86	0.65136	0.48972	0.0892448
87	0.590016	0.0432075			87	0.593507	0.450941	0.137081
88	0.58512	0.0385953			88	0.593639	0.429823	0.183467
89	0.467204	0.0389779			89	0.486647	0.371739	0.33637
90	0.445895	0.0402625			90	0.46475	0.144474	0.335051
91	0.688453	0.0451361			91	0.366005	0.297112	0.310277
92	0.608957	0.045356			92	0.563485	0.0822291	0.206381
93	0.602766	0.0424924			93	0.608538	0.113282	0.313034
94	0.590997	0.0428456			94	0.580998	0.0955509	0.230801
95	0.449032	0.0393802			95	0.422776	0.111896	0.162429
96	0.306196	0.0387752			96	0.230345	0.0963397	0.0994849
97	0.262497	0.0365562			97	0.281332	0.0679107	0.102971
98	0.0997995	0.0338435			98	0.129308	0.0357982	-0.0391777
99	0.232814	0.0365206			99	0.241151	0.168087	-0.0557593
100	0.249555	0.0381597			100	0.269112	0.153997	-0.025054
101	0.131347	0.0329018			101	0.167608	0.0695628	0.137866
102	0.228864	0.0319378			102	0.130797	0.0377634	0.222104
103	0.158598	0.0347848			103	0.186747	-0.135678	0.13842
104	-0.000466819	0.034865			104	0.0379339	-0.0216066	0.374313
105	0.0102824	0.0339934			105	0.0311915	-0.0401393	0.24528
106	-0.0151857	0.031126			106	0.000335945	0.00170585	0.332427
107	0.0856733	0.0334112			107	0.109214	-0.0738658	0.319514
108	0.21612	0.0352865			108	0.233055	-0.0383416	0.39234
109	0.192659	0.0358004			109	0.151053	-0.0503515	0.470506
110	0.226812	0.0348243			110	0.205579	-0.0511678	0.496534
111	0.0856063	0.028954			111	0.102264	-0.0237295	0.325673
112	0.17915	0.0308549			112	0.170709	-0.104815	0.275417
113	0.116686	0.0298944			113	0.108583	-0.10832	0.374368
114	0.273698	0.0371741			114	0.293905	-0.00136934	0.382762
115	0.0909296	0.030104			115	0.108992	0.0249956	0.419527
116	0.202314	0.0329746			116	0.231433	0.104005	0.233623
117	0.107868	0.0314036			117	0.143142	0.0583181	0.285677
118	0.322727	0.0329051			118	0.337909	0.108217	0.223771
119	0.50598	0.0334194			119	0.48972	0.0892448	0.44377
120	0.463353	0.0342074			120	0.450941	0.137081	0.252612
121	0.411688	0.0317129			121	0.429823	0.183467	0.244629
122	0.365152	0.0328235			122	0.371739	0.33637	0.211471
123	0.12284	0.0303676			123	0.144474	0.335051	0.247254
124	0.273691	0.0351274			124	0.297112	0.310277	0.245168
125	0.0544087	0.031713			125	0.0822291	0.206381	0.320994
126	0.0831447	0.0305399			126	0.113282	0.313034	0.355033
127	0.0548283	0.0339762			127	0.0955509	0.230801	0.299764
128	0.0771543	0.0310613			128	0.111896	0.162429	0.304714
129	0.077396	0.0315284			129	0.0963397	0.0994849	0.33449
130	0.0625322	0.0282793			130	0.0679107	0.102971	0.313649
131	0.0018165	0.0279732			131	0.0357982	-0.0391777	0.276889
132	0.135554	0.0310683			132	0.168087	-0.0557593	0.280439
133	0.126543	0.0305404			133	0.153997	-0.025054	0.253663
134	0.0543255	0.0299434			134	0.0695628	0.137866	0.313769
135	0.00551706	0.0297219			135	0.0377634	0.222104	0.309476
136	-0.179568	0.0278091			136	-0.135678	0.13842	0.413605
137	-0.0588518	0.0270278			137	-0.0216066	0.374313	0.460959
138	-0.0790352	0.0289927			138	-0.0401393	0.24528	0.455102
139	-0.0115226	0.0281166			139	0.00170585	0.332427	0.514044
140	-0.113594	0.0281691			140	-0.0738658	0.319514	0.599419
141	-0.0692145	0.0283269			141	-0.0383416	0.39234	0.44159
142	-0.0619616	0.0298221			142	-0.0503515	0.470506	0.369054
143	-0.0722014	0.0283173			143	-0.0511678	0.496534	0.43449
144	-0.0332463	0.028962			144	-0.0237295	0.325673	0.451648
145	-0.0810977	0.0237618			145	-0.104815	0.275417	0.519936
146	-0.137376	0.026033			146	-0.10832	0.374368	0.55011
147	-0.0246611	0.0270238			147	-0.00136934	0.382762	0.577509
148	0.00936332	0.0234397			148	0.0249956	0.419527	0.464697
149	0.0758565	0.0243095			149	0.104005	0.233623	0.436797
150	0.0148506	0.0251776			150	0.0583181	0.285677	0.41063
151	0.0816517	0.0258909			151	0.108217	0.223771	0.403665
152	0.0843113	0.0251343			152	0.0892448	0.44377	0.473518
153	0.122284	0.0252835			153	0.137081	0.252612	0.532958
154	0.168871	0.0264421			154	0.183467	0.244629	0.545545
155	0.358036	0.0276641			155	0.33637	0.211471	0.573326
156	0.315606	0.025084			156	0.335051	0.247254	0.638568
157	0.298788	0.0289666			157	0.310277	0.245168	0.635152
158	0.201171	0.0275688			158	0.206381	0.320994	0.449881
159	0.29686	0.0289031			159	0.313034	0.355033	0.431612
160	0.20711	0.0274858			160	0.230801	0.299764	0.477635
161	0.127457	0.0238433			161	0.162429	0.304714	0.377032
162	0.0702176	0.0244989			162	0.0994849	0.33449	0.359417
163	0.0671165	0.0242386			163	0.102971	0.313649	0.370436
164	-0.056369	0.0203377			164	-0.0391777	0.276889	0.538823
165	-0.0826352	0.0216677			165	-0.0557593	0.280439	0.460615
166	-0.0580785	0.0235731			166	-0.025054	0.253663	0.232993
167	0.110318	0.02496			167	0.137866	0.313769	0.341431
168	0.190251	0.0244696			168	0.222104	0.309476	0.351564
169	0.1081	0.025058			169	0.13842	0.413605	0.366235
170	0.365606	0.0269659			170	0.374313	0.460959	0.469257
171	0.224385	0.0265314			171	0.24528	0.455102	0.437444
172	0.313054	0.024142			172	0.332427	0.514044	0.513795
173	0.319639	0.02608			173	0.319514	0.599419	0.341204

## Sheet: 2G
Timeseries (top)					Phase Space (bottom)
Time (min)	EGFRp	EGF_EGFR			Time (min)	EGFRp(t)	EGFRp(t+d)	EGFRp(t+2d)
0	0.0570583	0			0	0.0570583	0.979761	0.327807
1	0.0485339	2.83698e-05			1	0.0485339	0.959453	0.340202
2	-0.0485749	3.824e-05			2	-0.0485749	0.943975	0.296951
3	-0.0313599	2.79876e-05			3	-0.0313599	0.933577	0.253315
4	-0.0256575	3.40465e-06			4	-0.0256575	0.96439	0.193441
5	-0.039001	2.6486e-05			5	-0.039001	0.904693	0.193211
6	-0.0195859	0.000798511			6	-0.0195859	0.933657	0.243233
7	0.0086848	0.00321599			7	0.0086848	0.934384	0.261321
8	0.0501538	0.00699908			8	0.0501538	0.878087	0.2459
9	0.180572	0.0115491			9	0.180572	0.866325	0.246821
10	0.275706	0.0148841			10	0.275706	0.917922	0.219079
11	0.373306	0.0184011			11	0.373306	0.933916	0.241286
12	0.459243	0.020933			12	0.459243	1	0.229707
13	0.514442	0.0238808			13	0.514442	0.961658	0.208841
14	0.59271	0.0260498			14	0.59271	0.968489	0.259538
15	0.617085	0.0271983			15	0.617085	0.927786	0.209613
16	0.65415	0.0301493			16	0.65415	0.90323	0.295366
17	0.696811	0.0314468			17	0.696811	0.857338	0.182984
18	0.81009	0.0344278			18	0.81009	0.735189	0.258451
19	0.819285	0.0362668			19	0.819285	0.643876	0.286892
20	0.843507	0.0382824			20	0.843507	0.618078	0.282025
21	0.807817	0.0406175			21	0.807817	0.637508	0.231914
22	0.803408	0.0418058			22	0.803408	0.537743	0.281539
23	0.730903	0.0432982			23	0.730903	0.52337	0.29278
24	0.740659	0.0475998			24	0.740659	0.510564	0.30478
25	0.784479	0.0509801			25	0.784479	0.467454	0.263059
26	0.737648	0.0493941			26	0.737648	0.481133	0.269273
27	0.774147	0.0548445			27	0.774147	0.454338	0.285683
28	0.745592	0.0556017			28	0.745592	0.430571	0.28753
29	0.739428	0.0534524			29	0.739428	0.473091	0.212673
30	0.742779	0.0578469			30	0.742779	0.449094	0.22171
31	0.693242	0.0599532			31	0.693242	0.451501	0.23268
32	0.748035	0.0656843			32	0.748035	0.449191	0.228415
33	0.74893	0.065537			33	0.74893	0.447997	0.219896
34	0.792436	0.0708403			34	0.792436	0.451115	0.256906
35	0.829932	0.0680736			35	0.829932	0.441123	0.254227
36	0.826902	0.0655036			36	0.826902	0.370444	0.240838
37	0.903055	0.0726595			37	0.903055	0.397045	0.295659
38	0.93565	0.0768593			38	0.93565	0.388245	0.26195
39	0.942074	0.0754785			39	0.942074	0.391022	0.254272
40	0.902545	0.082094			40	0.902545	0.348023	0.271477
41	0.950733	0.086325			41	0.950733	0.37476	0.25235
42	0.863374	0.0777883			42	0.863374	0.339297	0.276336
43	0.912674	0.0789014			43	0.912674	0.289782	0.285408
44	0.961257	0.0742222			44	0.961257	0.375716	0.274692
45	0.91554	0.0845928			45	0.91554	0.351998	0.265479
46	0.879923	0.0773289			46	0.879923	0.338202	0.227453
47	0.930671	0.0869769			47	0.930671	0.289723	0.282448
48	0.957887	0.0850485			48	0.957887	0.351509	0.262642
49	0.942968	0.0862204			49	0.942968	0.32113	0.292791
50	0.979761	0.0879804			50	0.979761	0.327807	0.346415
51	0.959453	0.0865715			51	0.959453	0.340202	0.338096
52	0.943975	0.0892462			52	0.943975	0.296951	0.26852
53	0.933577	0.0826739			53	0.933577	0.253315	0.339208
54	0.96439	0.090649			54	0.96439	0.193441	0.324132
55	0.904693	0.0861762			55	0.904693	0.193211	0.34503
56	0.933657	0.1			56	0.933657	0.243233	0.389431
57	0.934384	0.0846971			57	0.934384	0.261321	0.333469
58	0.878087	0.0804652			58	0.878087	0.2459	0.291435
59	0.866325	0.0849826			59	0.866325	0.246821	0.302958
60	0.917922	0.0904219			60	0.917922	0.219079	0.248917
61	0.933916	0.0797274			61	0.933916	0.241286	0.26084
62	1	0.0771826			62	1	0.229707	0.25612
63	0.961658	0.0758611			63	0.961658	0.208841	0.201415
64	0.968489	0.0801242			64	0.968489	0.259538	0.279381
65	0.927786	0.0886218			65	0.927786	0.209613	0.262
66	0.90323	0.0898066			66	0.90323	0.295366	0.259875
67	0.857338	0.0907133			67	0.857338	0.182984	0.251612
68	0.735189	0.0922209			68	0.735189	0.258451	0.253326
69	0.643876	0.0767988			69	0.643876	0.286892	0.309246
70	0.618078	0.0773192			70	0.618078	0.282025	0.214702
71	0.637508	0.0923254			71	0.637508	0.231914	0.293044
72	0.537743	0.0794268			72	0.537743	0.281539	0.296054
73	0.52337	0.087214			73	0.52337	0.29278	0.343625
74	0.510564	0.0826614			74	0.510564	0.30478	0.336906
75	0.467454	0.0754827			75	0.467454	0.263059	0.285181
76	0.481133	0.0765227			76	0.481133	0.269273	0.290678
77	0.454338	0.0726666			77	0.454338	0.285683	0.336427
78	0.430571	0.0744488			78	0.430571	0.28753	0.300036
79	0.473091	0.0761834			79	0.473091	0.212673	0.297792
80	0.449094	0.0798408			80	0.449094	0.22171	0.291209
81	0.451501	0.0847926			81	0.451501	0.23268	0.304689
82	0.449191	0.085857			82	0.449191	0.228415	0.292299
83	0.447997	0.0919956			83	0.447997	0.219896	0.270183
84	0.451115	0.0856132			84	0.451115	0.256906	0.275667
85	0.441123	0.0864761			85	0.441123	0.254227	0.285797
86	0.370444	0.0733425			86	0.370444	0.240838	0.300958
87	0.397045	0.0778727			87	0.397045	0.295659	0.299941
88	0.388245	0.0804789			88	0.388245	0.26195	0.275036
89	0.391022	0.0719342			89	0.391022	0.254272	0.25533
90	0.348023	0.0703815			90	0.348023	0.271477	0.264041
91	0.37476	0.0728407			91	0.37476	0.25235	0.31845
92	0.339297	0.0667702			92	0.339297	0.276336	0.268989
93	0.289782	0.0672416			93	0.289782	0.285408	0.303375
94	0.375716	0.0650342			94	0.375716	0.274692	0.337063
95	0.351998	0.0689927			95	0.351998	0.265479	0.249442
96	0.338202	0.0690683			96	0.338202	0.227453	0.240078
97	0.289723	0.0696607			97	0.289723	0.282448	0.276819
98	0.351509	0.0723501			98	0.351509	0.262642	0.266274
99	0.32113	0.0648963			99	0.32113	0.292791	0.297524
100	0.327807	0.0671697			100	0.327807	0.346415	0.279178
101	0.340202	0.0637905			101	0.340202	0.338096	0.315654
102	0.296951	0.0763984			102	0.296951	0.26852	0.288706
103	0.253315	0.064727			103	0.253315	0.339208	0.302593
104	0.193441	0.0587876			104	0.193441	0.324132	0.270484
105	0.193211	0.0560108			105	0.193211	0.34503	0.3335
106	0.243233	0.053656			106	0.243233	0.389431	0.3446
107	0.261321	0.0522191			107	0.261321	0.333469	0.364163
108	0.2459	0.055889			108	0.2459	0.291435	0.364518
109	0.246821	0.0510311			109	0.246821	0.302958	0.387224
110	0.219079	0.0412991			110	0.219079	0.248917	0.375389
111	0.241286	0.043969			111	0.241286	0.26084	0.343754
112	0.229707	0.0378946			112	0.229707	0.25612	0.356744
113	0.208841	0.0537562			113	0.208841	0.201415	0.366564
114	0.259538	0.054438			114	0.259538	0.279381	0.297645
115	0.209613	0.0475184			115	0.209613	0.262	0.333799
116	0.295366	0.0548457			116	0.295366	0.259875	0.307271
117	0.182984	0.0445325			117	0.182984	0.251612	0.303389
118	0.258451	0.0428049			118	0.258451	0.253326	0.339111
119	0.286892	0.0415612			119	0.286892	0.309246	0.325857
120	0.282025	0.0468056			120	0.282025	0.214702	0.305094
121	0.231914	0.047434			121	0.231914	0.293044	0.27031
122	0.281539	0.0563691			122	0.281539	0.296054	0.313536
123	0.29278	0.0481544			123	0.29278	0.343625	0.307177
124	0.30478	0.0604455			124	0.30478	0.336906	0.299346
125	0.263059	0.0455517			125	0.263059	0.285181	0.196545
126	0.269273	0.0522249			126	0.269273	0.290678	0.22563
127	0.285683	0.0539031			127	0.285683	0.336427	0.26704
128	0.28753	0.0540294			128	0.28753	0.300036	0.307133
129	0.212673	0.049385			129	0.212673	0.297792	0.231488
130	0.22171	0.0458104			130	0.22171	0.291209	0.216774
131	0.23268	0.0481155			131	0.23268	0.304689	0.279193
132	0.228415	0.0517628			132	0.228415	0.292299	0.269115
133	0.219896	0.0553842			133	0.219896	0.270183	0.275854
134	0.256906	0.0531523			134	0.256906	0.275667	0.296498
135	0.254227	0.0521938			135	0.254227	0.285797	0.314629
136	0.240838	0.0457763			136	0.240838	0.300958	0.338918
137	0.295659	0.0437779			137	0.295659	0.299941	0.32626
138	0.26195	0.0427205			138	0.26195	0.275036	0.315444
139	0.254272	0.052658			139	0.254272	0.25533	0.257048

## Sheet: 2H
	Cell 0	Cell 1	Cell 2	Cell 3	Cell 4	Cell 5	Cell 6	Cell 7	Cell 8	Cell 9	Cell 10	Cell 11	Cell 12	Cell 13	Cell 14	Cell 15	Cell 16	Cell 17	Cell 18	Cell 19
0	0.657202	0.69579	0.598183	0.628125	0.490141	0.549228	0.739914	0.772262	0.471045	0.620605	0.755008	0.27367	0.825966	0.734471	0.666091	0.826295	0.875	0.680308	0.518834	0.851826
1	0.672105	0.709546	0.595463	0.626372	0.461834	0.569409	0.690512	0.714065	0.457974	0.594562	0.794166	0.275537	0.800878	0.749398	0.605577	0.791094	0.841645	0.652425	0.497915	0.872267
2	0.653373	0.678194	0.610974	0.619896	0.486424	0.513585	0.690004	0.731844	0.443846	0.587529	0.808389	0.28057	0.783493	0.736773	0.676891	0.789972	0.864959	0.64307	0.506475	0.80496
3	0.620896	0.6689	0.589657	0.653579	0.572229	0.551372	0.668224	0.711728	0.43505	0.537914	0.802772	0.275738	0.789487	0.731342	0.670049	0.642043	0.911906	0.647696	0.480025	0.835483
4	0.738585	0.677825	0.58948	0.659514	0.624615	0.552611	0.67812	0.780444	0.416056	0.493508	0.819756	0.271382	0.744134	0.731749	0.458818	0.583879	0.927032	0.726845	0.528877	0.887022
5	0.797493	0.672373	0.600868	0.676953	0.598682	0.63149	0.73185	0.802156	0.443476	0.514446	0.77977	0.291351	0.734699	0.732854	0.496824	0.567885	0.897798	0.783016	0.541152	0.826944
6	0.826328	0.717123	0.627295	0.697095	0.596455	0.706242	0.709123	0.783367	0.609747	0.707596	0.796292	0.286499	0.758222	0.749599	0.528823	0.575818	0.886804	0.822328	0.618594	0.821151
7	0.827306	0.711532	0.638656	0.727076	0.618721	0.703218	0.690951	0.889684	0.835052	0.71435	0.777391	0.291382	0.737135	0.768092	0.57099	0.592254	0.893488	0.811085	0.726453	0.806951
8	0.819493	0.757522	0.663165	0.731919	0.609755	0.675524	0.829136	0.843025	0.882697	0.810269	0.809243	0.28576	0.748431	0.79138	0.611867	0.559859	0.812118	0.834424	0.755583	0.849153
9	0.83351	0.699305	0.667884	0.731311	0.594515	0.819851	0.776804	0.895951	0.900476	0.886158	0.8322	0.303635	0.769316	0.791461	0.639612	0.563159	0.893105	0.839582	0.76667	0.804177
10	0.846382	0.697669	0.715895	0.74862	0.609374	0.798628	0.856875	0.866383	0.857936	0.888073	0.796846	0.334239	0.784592	0.817053	0.670888	0.563184	0.868123	0.886219	0.809893	0.794629
11	0.854453	0.713503	0.73261	0.745264	0.604213	0.78189	0.872722	0.88898	0.912474	0.855541	0.884324	0.348543	0.832573	0.863496	0.690883	0.571059	0.690731	0.875456	0.806247	0.887514
12	0.854247	0.706584	0.782712	0.753425	0.640659	0.807468	0.741965	0.920228	0.892357	0.878105	0.816993	0.345999	0.796451	0.866515	0.708812	0.564775	0.696781	0.864254	0.799357	0.803744
13	0.827924	0.7511	0.749525	0.725104	0.670552	0.70749	0.777129	0.931634	0.907589	0.828172	0.856044	0.379771	0.820943	0.853774	0.696433	0.729418	0.799785	0.857287	0.803251	0.839677
14	0.85256	0.717415	0.731522	0.718834	0.65169	0.812586	0.833048	0.878547	0.881967	0.823359	0.874551	0.388313	0.814181	0.865113	0.711003	0.741724	0.787571	0.892193	0.751837	0.91826
15	0.855272	0.740708	0.736069	0.724816	0.657133	0.717497	0.76704	0.906382	0.856956	0.810416	0.904857	0.388882	0.866289	0.871354	0.723362	0.752413	0.775531	0.85852	0.764009	0.869984
16	0.857424	0.764724	0.717793	0.720383	0.651176	0.703971	0.792063	0.845582	0.852005	0.67466	0.885167	0.412237	0.875233	0.833364	0.695783	0.586309	0.748395	0.884469	0.687027	0.933827
17	0.813944	0.784561	0.692325	0.71649	0.681926	0.635481	0.869292	0.796237	0.841423	0.849682	0.883	0.399702	0.853953	0.837879	0.712567	0.735432	0.80603	0.903205	0.712113	0.935759
18	0.828384	0.777922	0.709459	0.713197	0.685612	0.580955	0.779482	0.864743	0.849007	0.800406	0.871664	0.40316	0.861163	0.857086	0.724232	0.72715	0.7909	0.899174	0.705621	0.946701
19	0.847022	0.768691	0.743751	0.741389	0.695488	0.629848	0.787972	0.877904	0.785385	0.756927	0.86329	0.402204	0.837385	0.844926	0.71572	0.75285	0.770511	0.890618	0.728846	0.904086
20	0.842727	0.77086	0.730229	0.744332	0.696278	0.676582	0.771786	0.87522	0.762824	0.897019	0.860128	0.389057	0.872979	0.859638	0.693643	0.7247	0.76357	0.873669	0.742334	0.877296
21	0.831284	0.744024	0.752772	0.732994	0.690265	0.668144	0.81723	0.868949	0.837429	0.909233	0.874421	0.373703	0.870846	0.868048	0.685374	0.76747	0.814733	0.876607	0.779752	0.890321
22	0.833283	0.751622	0.748866	0.733339	0.692358	0.743899	0.828621	0.832875	0.814495	0.882966	0.842023	0.39596	0.872869	0.880973	0.699548	0.787696	0.792143	0.859506	0.743267	0.859859
23	0.854336	0.765136	0.757587	0.740614	0.687258	0.830255	0.860049	0.821812	0.847029	0.874508	0.860153	0.438684	0.869806	0.865507	0.693084	0.755993	0.808692	0.884607	0.776972	0.862648
24	0.877781	0.744526	0.764802	0.712383	0.710544	0.81224	0.818075	0.852828	0.854604	0.870208	0.830892	0.381317	0.870188	0.840321	0.685211	0.792389	0.830172	0.881829	0.732536	0.908531
25	0.872935	0.751895	0.765054	0.70934	0.710005	0.76637	0.875609	0.860756	0.867135	0.899546	0.843326	0.376173	0.862514	0.859415	0.747661	0.78875	0.846538	0.83947	0.805802	0.907395
26	0.863453	0.737886	0.753818	0.7218	0.678388	0.68838	0.830913	0.881557	0.875795	0.908998	0.833171	0.377697	0.828232	0.852929	0.742733	0.805957	0.832956	0.867762	0.766947	0.886577
27	0.868271	0.747206	0.786534	0.692978	0.678922	0.801608	0.812574	0.862151	0.846573	0.929697	0.862213	0.380134	0.851204	0.871334	0.746777	0.788905	0.816429	0.88946	0.804828	0.816681
28	0.842609	0.756352	0.728924	0.7503	0.703073	0.694877	0.814736	0.865704	0.84772	0.93762	0.890895	0.381785	0.861556	0.856744	0.770531	0.790843	0.81458	0.854044	0.72892	0.825623
29	0.848194	0.801525	0.743779	0.720086	0.727926	0.678231	0.85721	0.869747	0.846596	0.95821	0.908474	0.380774	0.811576	0.852848	0.778601	0.80592	0.749055	0.855069	0.703214	0.849346
30	0.857578	0.822226	0.748536	0.720722	0.716204	0.769301	0.827859	0.864101	0.845207	0.946028	0.918919	0.376227	0.828528	0.89469	0.789584	0.833755	0.804031	0.871313	0.718097	0.901444
31	0.859388	0.762331	0.765029	0.720035	0.706125	0.81147	0.827143	0.812785	0.805031	0.952045	0.915977	0.389741	0.8267	0.893155	0.762403	0.819022	0.813394	0.835413	0.764713	0.901206
32	0.857995	0.816718	0.762122	0.718342	0.71867	0.843232	0.854767	0.828247	0.869057	0.934564	0.920266	0.399325	0.833954	0.924731	0.811384	0.822442	0.775119	0.829243	0.748422	0.859903
33	0.881865	0.788056	0.781374	0.685277	0.717791	0.783247	0.839014	0.855061	0.865826	0.941935	0.898297	0.39087	0.841688	0.904607	0.846208	0.830151	0.7461	0.869721	0.786735	0.9182
34	0.872103	0.759854	0.772186	0.643948	0.719172	0.845084	0.846058	0.838511	0.896904	0.907872	0.86883	0.40287	0.844651	0.916323	0.813628	0.842818	0.818228	0.895628	0.766229	0.909946
35	0.87906	0.735299	0.746644	0.628582	0.741184	0.645867	0.825461	0.84842	0.893439	0.926785	0.886792	0.397944	0.837169	0.910435	0.824241	0.822852	0.804873	0.875679	0.786863	0.89985
36	0.878036	0.783418	0.751763	0.639894	0.738609	0.674059	0.810325	0.839972	0.927935	0.93154	0.826683	0.404275	0.855219	0.906559	0.821038	0.798155	0.802444	0.910818	0.787811	0.820457
37	0.866622	0.734944	0.761206	0.631712	0.73955	0.69391	0.795982	0.84466	0.93476	0.935997	0.863052	0.384008	0.857826	0.865657	0.810365	0.81748	0.81195	0.921593	0.791667	0.829523
38	0.895896	0.721592	0.757481	0.600279	0.73968	0.59437	0.834951	0.832347	0.913354	0.921754	0.855799	0.393925	0.830397	0.862062	0.811166	0.826664	0.772917	0.914888	0.77875	0.861832
39	0.884043	0.732003	0.758158	0.612196	0.741859	0.653524	0.929754	0.862104	0.884707	0.915115	0.826664	0.419408	0.8218	0.873805	0.809214	0.815713	0.764646	0.899627	0.75146	0.84895
40	0.874869	0.778935	0.70614	0.570542	0.764422	0.612875	0.846115	0.809888	0.887955	0.908033	0.839812	0.446975	0.877215	0.883343	0.820112	0.823397	0.820261	0.922884	0.74633	0.866365
41	0.87945	0.686684	0.72029	0.568668	0.763859	0.673835	0.862086	0.794582	0.88031	0.918886	0.815916	0.444966	0.869843	0.883083	0.832516	0.853777	0.767326	0.926064	0.82762	0.865398
42	0.873841	0.667758	0.710339	0.612306	0.790856	0.760627	0.86013	0.804394	0.863307	0.938855	0.827514	0.429802	0.845407	0.928205	0.840102	0.78599	0.760034	0.917106	0.868084	0.873243
43	0.875844	0.655543	0.712294	0.607365	0.751759	0.760638	0.907621	0.834586	0.931709	0.942048	0.825184	0.421126	0.862352	0.890573	0.834833	0.824578	0.766063	0.914883	0.8443	0.872408
44	0.851274	0.669951	0.705775	0.606739	0.737262	0.803443	0.912397	0.836128	0.91975	0.94296	0.786885	0.425	0.858655	0.932584	0.844685	0.855257	0.869377	0.903535	0.784442	0.896263
45	0.868489	0.708966	0.679685	0.579795	0.749421	0.74654	0.866449	0.874938	0.908709	0.908139	0.825319	0.407581	0.853047	0.928695	0.812449	0.843654	0.859813	0.92372	0.794411	0.886057
46	0.874436	0.738718	0.675026	0.556197	0.746065	0.670073	0.874425	0.867682	0.926102	0.912225	0.838971	0.397126	0.837533	0.926629	0.812231	0.842426	0.795755	0.940157	0.837859	0.880747
47	0.824587	0.760674	0.648396	0.572686	0.761596	0.666667	0.921002	0.838417	0.908505	0.936447	0.80449	0.417557	0.835198	0.916598	0.857678	0.828034	0.76546	0.922273	0.772384	0.935814
48	0.828937	0.734748	0.702874	0.583813	0.745276	0.675366	0.898375	0.854873	0.894398	0.91828	0.77708	0.405546	0.808499	0.908559	0.829975	0.799734	0.775483	0.950611	0.724299	0.923807
49	0.853213	0.816691	0.698185	0.584343	0.721502	0.678121	0.881077	0.853321	0.892144	0.924981	0.795637	0.397731	0.832065	0.896632	0.862167	0.828285	0.771216	0.925251	0.797432	0.883431
50	0.873232	0.830953	0.692888	0.552373	0.695098	0.812126	0.88042	0.830427	0.912871	0.908016	0.808032	0.374255	0.865667	0.92198	0.865433	0.821172	0.797405	0.941081	0.803584	0.916731
51	0.868768	0.755678	0.697931	0.564234	0.687692	0.859135	0.82283	0.87406	0.906059	0.92266	0.798012	0.412801	0.80471	0.926998	0.867354	0.786842	0.707174	0.933369	0.798946	0.918673
52	0.864113	0.797694	0.673363	0.553535	0.698681	0.777443	0.885003	0.845729	0.911327	0.881396	0.779889	0.419045	0.823376	0.930272	0.816026	0.847008	0.723692	0.929323	0.802268	0.818482
53	0.867036	0.83648	0.664899	0.543489	0.648231	0.81786	0.770395	0.805825	0.917344	0.898862	0.764854	0.396127	0.76854	0.907794	0.805795	0.830979	0.844751	0.937197	0.876246	0.864266
54	0.872669	0.789623	0.689824	0.541406	0.687142	0.737431	0.79284	0.805347	0.92411	0.910646	0.733222	0.420106	0.765104	0.919093	0.872372	0.820179	0.772253	0.95562	0.862253	0.812513
55	0.865753	0.765711	0.704043	0.527984	0.641163	0.761978	0.878827	0.833969	0.930851	0.892235	0.765062	0.42537	0.784801	0.930389	0.845138	0.836522	0.851538	0.949237	0.844602	0.849036
56	0.86523	0.780094	0.708499	0.548799	0.671949	0.818419	0.835023	0.825444	0.932846	0.921801	0.770424	0.418029	0.795046	0.907738	0.851366	0.831671	0.764475	0.956599	0.851128	0.874884
57	0.853988	0.785831	0.755842	0.545793	0.659874	0.726248	0.814384	0.812431	0.932429	0.943634	0.783784	0.430235	0.782213	0.88979	0.820157	0.832503	0.676082	0.952096	0.844117	0.816534
58	0.894297	0.807791	0.740133	0.579205	0.678467	0.73677	0.793958	0.878424	0.897855	0.937111	0.781317	0.400367	0.789187	0.898247	0.825329	0.848265	0.858807	0.957255	0.829474	0.792691
59	0.909932	0.803776	0.723686	0.608807	0.667321	0.815374	0.871491	0.853794	0.909146	0.930399	0.698315	0.401792	0.780468	0.888429	0.846494	0.825766	0.784635	0.965	0.8	0.870459
60	0.91428	0.80583	0.735164	0.623333	0.645821	0.721392	0.837784	0.849121	0.895417	0.94361	0.67361	0.404365	0.784648	0.875089	0.869002	0.803365	0.705408	0.960478	0.825848	0.872714
61	0.925237	0.758555	0.743885	0.623762	0.634743	0.754924	0.893081	0.844173	0.86952	0.932912	0.715022	0.406406	0.785832	0.895599	0.866027	0.837163	0.853735	0.972965	0.803641	0.879092
62	0.91728	0.763125	0.734023	0.619531	0.624713	0.854126	0.852443	0.865087	0.858365	0.934495	0.688654	0.411503	0.774435	0.885662	0.851366	0.844628	0.856317	0.956853	0.796489	0.850183
63	0.886287	0.763571	0.7334	0.614717	0.663858	0.863537	0.866736	0.809143	0.877116	0.931962	0.706021	0.426161	0.804405	0.926629	0.830121	0.85475	0.808882	0.956617	0.771889	0.852922
64	0.857921	0.742263	0.759473	0.599825	0.661137	0.89703	0.871688	0.849125	0.864028	0.911301	0.743367	0.401212	0.812981	0.912005	0.82325	0.818261	0.817283	0.951121	0.771914	0.838746
65	0.883542	0.71097	0.773808	0.571963	0.675446	0.737735	0.876965	0.820317	0.843115	0.91736	0.704122	0.391546	0.829537	0.934337	0.841645	0.821153	0.803937	0.961757	0.812575	0.829498
66	0.864483	0.701	0.75704	0.575152	0.699102	0.763479	0.927957	0.848559	0.869313	0.910144	0.77772	0.39847	0.792187	0.905594	0.803683	0.80922	0.62563	0.947024	0.805663	0.936208
67	0.844787	0.716416	0.763933	0.591547	0.698751	0.784229	0.860526	0.836809	0.908812	0.890668	0.827861	0.415028	0.798873	0.899076	0.79623	0.783284	0.689344	0.947432	0.721026	0.84513
68	0.869883	0.715169	0.793356	0.568074	0.714534	0.777515	0.862812	0.79996	0.896531	0.890996	0.793117	0.426985	0.7786	0.898435	0.801684	0.831472	0.823502	0.939891	0.782933	0.858387
69	0.825758	0.708883	0.783485	0.618859	0.685602	0.821056	0.914379	0.719756	0.892365	0.889066	0.795969	0.42102	0.776519	0.886085	0.817754	0.831129	0.833902	0.937424	0.834706	0.89107
70	0.866452	0.739091	0.76755	0.647051	0.689194	0.791343	0.862393	0.731739	0.915859	0.919957	0.768567	0.4253	0.773948	0.885109	0.742222	0.819179	0.786984	0.954847	0.796313	0.876706
71	0.84116	0.720746	0.712338	0.63618	0.701194	0.781867	0.870592	0.855919	0.934808	0.894674	0.799431	0.416952	0.751126	0.894867	0.723629	0.822541	0.766322	0.937178	0.773791	0.863292
72	0.851032	0.747147	0.733707	0.635774	0.649932	0.682667	0.847867	0.805927	0.914659	0.895978	0.800151	0.452385	0.75333	0.919329	0.641956	0.844026	0.780879	0.960665	0.809803	0.831377
73	0.871821	0.70847	0.698955	0.601551	0.700688	0.797173	0.81459	0.81634	0.922581	0.883883	0.738388	0.448931	0.744269	0.918363	0.613846	0.861324	0.832526	0.951742	0.803754	0.844439
74	0.89209	0.654191	0.707419	0.602134	0.656219	0.816752	0.83293	0.815526	0.895728	0.853107	0.761052	0.413547	0.753234	0.898857	0.717511	0.837397	0.796767	0.955611	0.833477	0.871321
75	0.844964	0.653278	0.714103	0.618769	0.687664	0.858527	0.869901	0.801678	0.884411	0.837383	0.740483	0.400236	0.747248	0.901662	0.711603	0.863037	0.764412	0.948437	0.856862	0.837419
76	0.835249	0.688782	0.683627	0.617339	0.675262	0.778322	0.874975	0.735901	0.880927	0.838864	0.679746	0.387482	0.761643	0.912092	0.813363	0.850782	0.746145	0.944209	0.845126	0.901412
77	0.82176	0.718527	0.701993	0.633158	0.646114	0.763437	0.870026	0.731645	0.909611	0.816006	0.747888	0.40123	0.752871	0.925228	0.648102	0.848536	0.806828	0.950874	0.825572	0.903992
78	0.846937	0.682728	0.680095	0.598	0.653481	0.734675	0.887333	0.763861	0.894308	0.811574	0.712726	0.415533	0.756846	0.902957	0.642893	0.868527	0.764461	0.936755	0.835144	0.880011
79	0.844455	0.665083	0.719383	0.589476	0.661728	0.832939	0.819397	0.794962	0.879711	0.883126	0.708178	0.417229	0.769338	0.922345	0.650152	0.847753	0.845474	0.911513	0.863636	0.914036
80	0.8391	0.712302	0.698583	0.573168	0.653431	0.725029	0.865241	0.764013	0.930835	0.890155	0.672843	0.383867	0.768767	0.915641	0.667983	0.876696	0.842079	0.923243	0.803924	0.906932
81	0.85607	0.692814	0.754025	0.607916	0.587272	0.862003	0.913097	0.798107	0.929224	0.850524	0.638205	0.386743	0.770398	0.903169	0.69173	0.866653	0.866023	0.937458	0.826244	0.857536
82	0.873073	0.736978	0.741271	0.583407	0.588675	0.800025	0.910233	0.751134	0.932628	0.883564	0.648598	0.38748	0.728673	0.897048	0.670248	0.836466	0.810611	0.935594	0.804133	0.865012
83	0.859328	0.694457	0.802572	0.593375	0.621001	0.807453	0.900317	0.780126	0.885505	0.832765	0.655316	0.410458	0.731061	0.856701	0.678223	0.841287	0.751875	0.941197	0.828373	0.804497
84	0.81355	0.71615	0.800357	0.628641	0.618783	0.814159	0.896912	0.772736	0.89879	0.836296	0.663358	0.415905	0.725109	0.865496	0.694402	0.838513	0.755871	0.932735	0.851766	0.74986
85	0.838206	0.725306	0.777866	0.647901	0.591121	0.805947	0.872101	0.789474	0.910063	0.841432	0.662851	0.381758	0.709479	0.856908	0.659411	0.818517	0.802113	0.956671	0.874456	0.862955
86	0.831446	0.711671	0.791814	0.653969	0.559075	0.764589	0.89034	0.753104	0.898337	0.812385	0.604951	0.389976	0.712125	0.870357	0.676676	0.827531	0.739989	0.930803	0.847181	0.920622
87	0.856474	0.69304	0.80013	0.640511	0.659313	0.802367	0.875142	0.783425	0.863232	0.839569	0.645126	0.376373	0.718143	0.862299	0.660543	0.835145	0.652812	0.927141	0.879211	0.864656
88	0.835863	0.693353	0.797947	0.668641	0.67596	0.826009	0.84804	0.773101	0.835324	0.802516	0.615993	0.347375	0.734322	0.913489	0.680351	0.83075	0.708236	0.939351	0.885673	0.926531
89	0.832691	0.693758	0.770293	0.653378	0.655736	0.841708	0.844606	0.81619	0.84591	0.755142	0.586764	0.336425	0.720801	0.890896	0.722131	0.822812	0.642576	0.946967	0.87328	0.931427
90	0.788105	0.66924	0.779157	0.744608	0.685106	0.759714	0.865675	0.828506	0.805592	0.709431	0.599454	0.341878	0.742239	0.88321	0.702671	0.792405	0.779555	0.942809	0.885911	0.892705
91	0.805102	0.734824	0.790369	0.689611	0.69335	0.803032	0.884449	0.81619	0.821816	0.742917	0.598531	0.340115	0.721071	0.892053	0.684608	0.80461	0.724784	0.953204	0.853955	0.901933
92	0.811075	0.727657	0.759735	0.748861	0.663623	0.794101	0.901661	0.794143	0.771956	0.773399	0.589725	0.378346	0.719402	0.907455	0.729388	0.836917	0.769945	0.930601	0.874616	0.925764
93	0.817504	0.738447	0.736949	0.738174	0.662405	0.851343	0.890438	0.756987	0.734529	0.740294	0.58132	0.354124	0.739917	0.869681	0.69944	0.795845	0.724915	0.923404	0.873425	0.950948
94	0.823069	0.759855	0.727377	0.756244	0.7164	0.821423	0.926901	0.767508	0.702604	0.721437	0.615295	0.33213	0.728522	0.896879	0.702943	0.789387	0.745026	0.926227	0.894572	0.907573
95	0.789885	0.685478	0.751332	0.759187	0.729875	0.855931	0.935289	0.740601	0.694345	0.744464	0.598301	0.336912	0.730482	0.896496	0.732271	0.810301	0.770866	0.902234	0.862936	0.887286
96	0.802523	0.686564	0.737798	0.751235	0.756398	0.851064	0.954342	0.762145	0.758713	0.759901	0.594037	0.340483	0.766475	0.881584	0.727069	0.818198	0.753661	0.9	0.829575	0.897861
97	0.799382	0.680522	0.761732	0.726152	0.754097	0.912692	0.9658	0.741838	0.785545	0.753134	0.547776	0.347205	0.748269	0.896624	0.727608	0.818813	0.762606	0.909522	0.843745	0.915344
98	0.81416	0.741314	0.730972	0.705593	0.68991	0.75517	0.94471	0.675797	0.799246	0.766355	0.554295	0.319404	0.73964	0.862866	0.727862	0.795563	0.779634	0.903066	0.802049	0.910748
99	0.830472	0.714406	0.754584	0.717008	0.679691	0.755556	0.920327	0.809826	0.725366	0.746107	0.565755	0.313478	0.73973	0.861432	0.740282	0.796791	0.876818	0.897037	0.850688	0.87
100	0.80535	0.707768	0.729706	0.708402	0.679219	0.80304	0.930165	0.728935	0.759259	0.807959	0.564618	0.330255	0.77737	0.906605	0.729052	0.804152	0.807411	0.885452	0.839845	0.912202
101	0.814504	0.712721	0.716485	0.689333	0.675483	0.769923	0.892142	0.745401	0.750962	0.803052	0.563282	0.316402	0.805437	0.8731	0.695114	0.820669	0.825837	0.889887	0.8382	0.900901
102	0.829265	0.772233	0.728657	0.672848	0.678544	0.706901	0.799052	0.704888	0.726172	0.801935	0.550335	0.284855	0.750902	0.886844	0.726484	0.819612	0.845216	0.890965	0.901042	0.906667
103	0.846965	0.730757	0.714455	0.671805	0.641394	0.735519	0.752073	0.739177	0.765857	0.787372	0.534326	0.299731	0.782719	0.899982	0.699969	0.776947	0.847835	0.91019	0.88833	0.891609
104	0.860983	0.717428	0.702524	0.681951	0.605282	0.706918	0.776621	0.720723	0.736896	0.777346	0.519871	0.30082	0.766398	0.895148	0.695114	0.803058	0.856985	0.869943	0.850516	0.903793
105	0.879879	0.721889	0.723382	0.687546	0.608714	0.782742	0.703644	0.718701	0.726157	0.752988	0.546404	0.288817	0.742106	0.897963	0.688813	0.820189	0.87557	0.890669	0.837904	0.933046
106	0.903922	0.791703	0.710976	0.684104	0.604695	0.746114	0.732103	0.724214	0.672998	0.730808	0.553617	0.312518	0.799384	0.906389	0.710328	0.83321	0.783015	0.848794	0.835604	0.920174
107	0.923476	0.809573	0.709898	0.692543	0.632719	0.72502	0.816215	0.708781	0.733225	0.74417	0.577032	0.318601	0.730744	0.887172	0.707484	0.794504	0.885246	0.843835	0.846647	0.937832
108	0.902168	0.824932	0.70806	0.731753	0.648298	0.78342	0.80832	0.707769	0.70228	0.724754	0.550464	0.322319	0.761337	0.881573	0.713568	0.814519	0.90238	0.914317	0.838444	0.947799
109	0.879412	0.796687	0.699709	0.685506	0.656593	0.792233	0.825986	0.694163	0.687584	0.677548	0.567624	0.323428	0.761142	0.873078	0.702005	0.794149	0.891465	0.926775	0.781161	0.927134
110	0.900683	0.745053	0.650924	0.683806	0.710302	0.856922	0.810562	0.658354	0.719305	0.71234	0.556501	0.31419	0.75948	0.850529	0.710803	0.8311	0.920326	0.904239	0.791959	0.917434
111	0.888599	0.683482	0.650464	0.713917	0.714502	0.785312	0.849172	0.747907	0.749703	0.691859	0.55973	0.329039	0.77867	0.825095	0.687166	0.838776	0.888105	0.930385	0.835369	0.909169
112	0.873481	0.723453	0.620996	0.702336	0.720557	0.732908	0.874971	0.6824	0.753117	0.674703	0.593665	0.336292	0.770517	0.840279	0.680964	0.7897	0.746143	0.924539	0.877377	0.906601
113	0.847216	0.750181	0.647009	0.698407	0.7583	0.714174	0.844828	0.736579	0.716951	0.657729	0.557103	0.343656	0.735945	0.826188	0.694548	0.796936	0.849974	0.928427	0.839053	0.879876
114	0.826546	0.720324	0.617881	0.658085	0.746434	0.755052	0.835929	0.713856	0.690399	0.636831	0.560455	0.365374	0.741887	0.792026	0.691094	0.787659	0.808462	0.932454	0.806602	0.837736
115	0.847681	0.797889	0.60772	0.632782	0.720571	0.818925	0.844912	0.689194	0.690782	0.624402	0.595989	0.362547	0.748424	0.798613	0.70202	0.79253	0.858812	0.935894	0.849761	0.8742
116	0.835011	0.763797	0.633105	0.625186	0.795395	0.804397	0.77798	0.715126	0.642276	0.619677	0.60083	0.369163	0.761251	0.797938	0.713242	0.799315	0.872987	0.916752	0.828661	0.874209
117	0.801669	0.71029	0.639077	0.598859	0.778552	0.815736	0.815795	0.69258	0.624331	0.615852	0.567475	0.380681	0.78307	0.766308	0.717694	0.826618	0.919851	0.89771	0.86055	0.840833
118	0.843892	0.749319	0.625386	0.609131	0.754824	0.813622	0.711129	0.671593	0.596174	0.603297	0.547187	0.377965	0.784059	0.769654	0.681525	0.827437	0.913226	0.907183	0.853381	0.901122
119	0.828621	0.707877	0.635321	0.587858	0.703553	0.799634	0.674043	0.641501	0.576135	0.595815	0.529207	0.359029	0.774054	0.791922	0.663377	0.824417	0.914589	0.907092	0.811879	0.862421
120	0.823114	0.744106	0.643001	0.618299	0.759173	0.807165	0.778412	0.641119	0.572822	0.619563	0.504727	0.309574	0.736033	0.781402	0.677277	0.833234	0.921336	0.922507	0.853672	0.865211
121	0.839166	0.740567	0.605912	0.589672	0.780188	0.795542	0.716928	0.68138	0.60474	0.634886	0.512911	0.307966	0.744556	0.796195	0.687325	0.793587	0.869554	0.871033	0.84682	0.850694
122	0.849685	0.657776	0.581769	0.59548	0.737157	0.827013	0.668124	0.739574	0.581421	0.616112	0.528448	0.311561	0.714601	0.772974	0.686421	0.819338	0.913275	0.900026	0.861437	0.849824
123	0.82461	0.726067	0.606783	0.577963	0.759086	0.819776	0.761506	0.662138	0.549895	0.596988	0.53077	0.305297	0.698026	0.765326	0.672377	0.860973	0.92529	0.901046	0.861009	0.785457
124	0.822923	0.736412	0.611279	0.592336	0.720003	0.796062	0.842342	0.625198	0.539412	0.573792	0.53809	0.3103	0.740352	0.761989	0.668101	0.860634	0.920653	0.871051	0.850477	0.792462
125	0.843088	0.72108	0.611052	0.61455	0.742904	0.816457	0.861995	0.672233	0.550907	0.55213	0.558994	0.302757	0.744933	0.757244	0.685606	0.824145	0.855491	0.843785	0.795785	0.8948
126	0.825499	0.711504	0.577678	0.595674	0.756013	0.814065	0.776565	0.634312	0.512276	0.560967	0.556555	0.28559	0.750712	0.75772	0.668322	0.820227	0.873675	0.812525	0.780353	0.862353
127	0.783184	0.744617	0.583141	0.60546	0.771767	0.799249	0.860694	0.624091	0.527853	0.549846	0.576231	0.319719	0.705189	0.735095	0.679996	0.846508	0.911097	0.835821	0.712952	0.894526
128	0.750807	0.709445	0.622072	0.610707	0.701486	0.81427	0.844544	0.658434	0.544221	0.531167	0.549977	0.327062	0.731459	0.754204	0.69403	0.841421	0.892661	0.822941	0.738732	0.745098
129	0.716737	0.720588	0.580615	0.61556	0.63079	0.80594	0.563605	0.636392	0.513985	0.540836	0.545898	0.31933	0.760465	0.743912	0.692402	0.84851	0.918146	0.849206	0.774135	0.798303
130	0.719378	0.730769	0.603569	0.592856	0.673225	0.783374	0.625241	0.62091	0.516367	0.549136	0.557732	0.318538	0.74053	0.751136	0.688086	0.871311	0.963511	0.834043	0.688916	0.816817
131	0.712986	0.757762	0.584432	0.584869	0.66949	0.786477	0.559507	0.624853	0.546308	0.526135	0.563573	0.295169	0.700198	0.753177	0.706469	0.817264	0.945857	0.844453	0.785481	0.766924
132	0.681886	0.778695	0.573167	0.570253	0.651954	0.842755	0.642026	0.61984	0.577936	0.527565	0.552156	0.320754	0.689956	0.769031	0.682889	0.841008	0.891098	0.806209	0.717446	0.786396
133	0.71163	0.768905	0.578594	0.545686	0.669178	0.802869	0.586761	0.66189	0.583957	0.509968	0.59477	0.313802	0.678462	0.775398	0.668344	0.851814	0.859312	0.783463	0.706577	0.751243
134	0.709753	0.689769	0.570652	0.557715	0.663843	0.834329	0.577594	0.62844	0.597775	0.437885	0.60418	0.323265	0.676887	0.777916	0.668347	0.847998	0.840492	0.794044	0.736011	0.966532
135	0.696924	0.660677	0.55618	0.547639	0.633886	0.861194	0.57592	0.610919	0.609041	0.481176	0.610182	0.318141	0.684881	0.672222	0.663129	0.899868	0.872766	0.844465	0.725923	0.864613
136	0.696128	0.71286	0.58696	0.548518	0.647622	0.805067	0.646564	0.609197	0.586898	0.468345	0.626272	0.327381	0.66408	0.695143	0.687067	0.880347	0.823828	0.867932	0.69342	0.874891
137	0.680719	0.714435	0.576886	0.554049	0.642777	0.890647	0.565389	0.600544	0.613078	0.539793	0.654142	0.328743	0.652086	0.779725	0.672374	0.874377	0.886294	0.885607	0.733229	0.822667
138	0.689957	0.658604	0.600749	0.570191	0.716621	0.80605	0.577547	0.626694	0.608472	0.530297	0.620346	0.322643	0.638855	0.716448	0.653305	0.868275	0.862169	0.868008	0.773259	0.870421
139	0.695726	0.685272	0.585276	0.588596	0.763864	0.856338	0.629926	0.611739	0.623766	0.515302	0.595468	0.314388	0.647874	0.719691	0.644314	0.902019	0.857808	0.832111	0.798403	0.894586
140	0.692171	0.699896	0.580792	0.568638	0.756012	0.821368	0.574819	0.618297	0.669251	0.516608	0.576459	0.331317	0.63653	0.74889	0.711532	0.889554	0.873277	0.765498	0.75949	0.9008
141	0.623327	0.654551	0.573775	0.573109	0.771248	0.809964	0.578401	0.593036	0.635358	0.555895	0.566653	0.3363	0.62385	0.727671	0.683333	0.892993	0.949768	0.787582	0.841642	0.815629
142	0.656724	0.701311	0.577737	0.573615	0.74255	0.776333	0.615355	0.67741	0.601527	0.529767	0.572873	0.356529	0.619529	0.791101	0.63724	0.86064	0.896808	0.735304	0.782131	0.825669
143	0.653498	0.664293	0.580447	0.569223	0.716989	0.762287	0.575693	0.634439	0.564105	0.542361	0.603533	0.339872	0.619713	0.742632	0.648413	0.876527	0.872544	0.805429	0.750825	0.831728
144	0.673488	0.646344	0.589216	0.567135	0.722025	0.818652	0.572383	0.628978	0.584634	0.52739	0.589929	0.337576	0.617387	0.75169	0.615422	0.882547	0.857935	0.855464	0.768848	0.857343
145	0.663579	0.673491	0.600357	0.576472	0.705373	0.773878	0.578502	0.606031	0.586596	0.520527	0.567895	0.326683	0.607512	0.723864	0.656213	0.875445	0.87803	0.789639	0.74403	0.8504
146	0.670992	0.651872	0.614767	0.588276	0.661471	0.857328	0.552341	0.626003	0.58222	0.531708	0.513424	0.349208	0.606257	0.726018	0.645511	0.853368	0.953601	0.794087	0.684552	0.941481
147	0.673284	0.677048	0.611933	0.600647	0.625727	0.88615	0.565042	0.61476	0.529273	0.540701	0.517552	0.356127	0.594489	0.75182	0.636325	0.826369	0.896669	0.789665	0.689634	0.854333
148	0.67528	0.698267	0.62881	0.595956	0.622648	0.870722	0.604232	0.679897	0.532602	0.546405	0.519502	0.36627	0.571351	0.722941	0.632129	0.884554	0.933292	0.835757	0.712945	0.866307
149	0.706205	0.702256	0.649736	0.599355	0.638985	0.830695	0.568417	0.642137	0.533051	0.526167	0.557331	0.379242	0.563646	0.731452	0.615453	0.877788	0.927355	0.837072	0.635323	0.854384
150	0.702622	0.715387	0.658078	0.593438	0.599443	0.877151	0.57208	0.608071	0.494414	0.524285	0.528983	0.384852	0.561022	0.749607	0.605339	0.86232	0.910417	0.819982	0.65848	0.861253
151	0.7034	0.730401	0.605018	0.599133	0.586642	0.852941	0.551611	0.617191	0.503583	0.50325	0.503014	0.355313	0.542896	0.770685	0.626825	0.885878	0.898649	0.843947	0.703573	0.910593
152	0.706806	0.729807	0.64488	0.590003	0.65271	0.837721	0.561051	0.589979	0.509552	0.499921	0.505125	0.371728	0.537754	0.762842	0.628441	0.827975	0.85189	0.823446	0.689328	0.864976
153	0.728784	0.758944	0.638827	0.591436	0.60899	0.872345	0.571511	0.628247	0.526736	0.482568	0.483063	0.373448	0.650325	0.777947	0.609389	0.888636	0.892614	0.821492	0.673131	0.851732
154	0.772629	0.794323	0.610195	0.594517	0.620387	0.872972	0.578824	0.614129	0.519228	0.483535	0.496412	0.359488	0.651708	0.7893	0.627414	0.879625	0.874457	0.802688	0.711178	0.90044
155	0.782074	0.773915	0.597535	0.611901	0.585269	0.854879	0.574643	0.586395	0.553792	0.463278	0.489848	0.374819	0.599646	0.773882	0.625977	0.858942	0.909869	0.787719	0.731142	0.881418
156	0.776324	0.762154	0.581	0.617974	0.592106	0.850601	0.512161	0.609535	0.548563	0.470883	0.469462	0.38683	0.609677	0.785258	0.643351	0.827171	0.877721	0.78468	0.678423	0.867981
157	0.816271	0.729829	0.575968	0.600354	0.614327	0.793237	0.579658	0.59924	0.540259	0.446337	0.508252	0.378336	0.621545	0.767172	0.63333	0.858105	0.919965	0.774657	0.724028	0.913588
158	0.809689	0.731842	0.583362	0.602248	0.646885	0.850856	0.576296	0.601284	0.556649	0.477289	0.497824	0.372076	0.595599	0.764263	0.641098	0.867131	0.913802	0.790997	0.707241	0.929149
159	0.790835	0.728035	0.552547	0.590241	0.691399	0.888337	0.596739	0.662908	0.553919	0.474159	0.480337	0.374683	0.642788	0.791657	0.645812	0.84927	0.902529	0.775975	0.708488	0.886209
160	0.778018	0.750765	0.524334	0.570143	0.721799	0.863964	0.565122	0.66138	0.586154	0.494967	0.471601	0.409184	0.635646	0.784386	0.629815	0.866743	0.907927	0.784983	0.704963	0.928341
161	0.791196	0.74039	0.585552	0.57163	0.759961	0.887062	0.56731	0.629485	0.614583	0.470975	0.481276	0.398389	0.619013	0.770539	0.631411	0.861877	0.907118	0.735797	0.659354	0.936892
162	0.804238	0.749188	0.667627	0.552733	0.746975	0.887058	0.612291	0.644317	0.611993	0.480344	0.496289	0.418796	0.640216	0.740258	0.649186	0.804837	0.927721	0.72536	0.715482	0.913244
163	0.791255	0.752168	0.596039	0.546866	0.747652	0.878495	0.625205	0.569553	0.617699	0.462835	0.481668	0.38189	0.628547	0.792851	0.644549	0.844333	0.889869	0.740403	0.71552	0.9285
164	0.804924	0.733775	0.658152	0.571983	0.755181	0.91839	0.628507	0.559741	0.616732	0.490779	0.44107	0.378354	0.623932	0.795932	0.633009	0.847675	0.887752	0.72219	0.695224	0.924113
165	0.823961	0.771982	0.634853	0.573515	0.733533	0.892886	0.631624	0.565326	0.638761	0.52111	0.450031	0.379182	0.671748	0.7623	0.658114	0.851304	0.912252	0.712313	0.705908	0.912858
166	0.832721	0.802603	0.63809	0.57485	0.742308	0.915339	0.661612	0.564512	0.620247	0.518606	0.479487	0.372748	0.651368	0.775723	0.647206	0.840532	0.858416	0.701955	0.678468	0.947129
167	0.82949	0.835703	0.629371	0.606298	0.807873	0.865739	0.562532	0.588286	0.564037	0.577392	0.46417	0.377592	0.671314	0.789598	0.665535	0.834103	0.847953	0.703485	0.644176	0.955708
168	0.823936	0.827131	0.648742	0.598252	0.776321	0.918453	0.629132	0.599761	0.61679	0.591093	0.453223	0.388469	0.637352	0.777147	0.650501	0.862006	0.94679	0.696536	0.603642	0.969474
169	0.80999	0.879208	0.655934	0.598653	0.770527	0.883988	0.625649	0.527179	0.645285	0.529528	0.465307	0.377103	0.68295	0.781633	0.67203	0.861181	0.808932	0.672693	0.65529	0.956457
170	0.788331	0.818882	0.659231	0.633626	0.766403	0.884739	0.632407	0.501463	0.645031	0.514756	0.471338	0.364022	0.674944	0.773414	0.665249	0.848845	0.962172	0.701199	0.638502	0.96938
171	0.811628	0.857639	0.680295	0.666165	0.757605	0.80597	0.526935	0.523292	0.630574	0.560596	0.490526	0.395689	0.652671	0.755479	0.673968	0.802123	0.785177	0.66743	0.63633	0.974593
172	0.782083	0.818814	0.666093	0.674978	0.797176	0.824362	0.501793	0.551316	0.688879	0.576596	0.491759	0.395414	0.726183	0.779753	0.681579	0.877189	0.917978	0.691735	0.592385	0.961339
173	0.817542	0.818025	0.649991	0.671599	0.743185	0.859803	0.513284	0.538742	0.621715	0.63631	0.482207	0.382395	0.720025	0.764099	0.680785	0.868329	0.917413	0.694286	0.580956	0.945776
174	0.756546	0.851954	0.622676	0.68497	0.729452	0.83738	0.498657	0.539387	0.623828	0.547003	0.49933	0.406662	0.703981	0.759407	0.699173	0.889841	0.919037	0.720946	0.599826	0.952849
175	0.777631	0.795548	0.616528	0.679419	0.647622	0.825852	0.497001	0.516221	0.632369	0.498744	0.502228	0.378047	0.702367	0.740863	0.668	0.870822	0.96847	0.738839	0.538836	0.955673
176	0.796892	0.764927	0.700021	0.689835	0.734636	0.888163	0.514155	0.503342	0.616377	0.494291	0.502714	0.403689	0.70309	0.746644	0.692369	0.85799	0.940303	0.763851	0.554419	0.954491
177	0.800462	0.76975	0.628605	0.697446	0.662496	0.834229	0.508647	0.535189	0.619756	0.489283	0.51486	0.40138	0.713491	0.753276	0.680977	0.870522	0.820005	0.767999	0.582619	0.951239
178	0.829133	0.792933	0.692371	0.673038	0.705732	0.825526	0.508288	0.522571	0.529003	0.483558	0.52121	0.404863	0.727762	0.771865	0.664582	0.878161	0.967189	0.767568	0.5326	0.9612
179	0.879969	0.767984	0.67773	0.662275	0.713757	0.885448	0.498967	0.53949	0.553864	0.497999	0.510655	0.401151	0.703165	0.767081	0.684064	0.86081	0.935106	0.792285	0.580709	0.957724
180	0.835607	0.756638	0.716216	0.661401	0.687539	0.884316	0.514402	0.575113	0.558594	0.501272	0.518546	0.418943	0.697186	0.776852	0.688454	0.844192	0.807732	0.787063	0.604912	0.96482
181	0.8759	0.750804	0.708273	0.658509	0.679556	0.862186	0.538401	0.606394	0.549069	0.469964	0.507271	0.399702	0.674798	0.79864	0.678832	0.850399	0.805862	0.79809	0.524635	0.96384
182	0.819523	0.735284	0.67813	0.668991	0.687143	0.858685	0.570415	0.650206	0.607513	0.513681	0.49372	0.409082	0.695829	0.795378	0.698686	0.856436	0.827516	0.792656	0.476119	0.965281
183	0.805306	0.734863	0.684686	0.682925	0.682743	0.850329	0.567176	0.637569	0.542531	0.520358	0.464854	0.398194	0.670495	0.801013	0.687253	0.875784	0.801537	0.768373	0.532504	0.950219
184	0.778727	0.785345	0.661079	0.673604	0.656811	0.894475	0.589163	0.642536	0.553108	0.538738	0.456762	0.385246	0.67765	0.826481	0.704739	0.9007	0.842315	0.771438	0.505609	0.960473
185	0.813712	0.778201	0.670982	0.657523	0.632946	0.886122	0.571764	0.65949	0.518989	0.52388	0.477375	0.379314	0.694147	0.823573	0.697791	0.872718	0.959433	0.756492	0.548924	0.96826
186	0.832976	0.745794	0.660393	0.658018	0.684794	0.878536	0.703827	0.638233	0.506405	0.529041	0.449256	0.384984	0.72429	0.811936	0.705284	0.853124	0.738471	0.768962	0.507509	0.958549
187	0.790304	0.759077	0.601451	0.656858	0.717761	0.889608	0.697719	0.622562	0.537125	0.527456	0.417076	0.419483	0.730011	0.789295	0.693525	0.870214	0.691216	0.791535	0.499297	0.960506
188	0.809668	0.760422	0.632373	0.665837	0.652677	0.833995	0.637111	0.632944	0.525543	0.525682	0.45518	0.432464	0.614127	0.807509	0.70593	0.863168	0.906667	0.395347	0.508206	0.950636
189	0.856088	0.759659	0.711719	0.672902	0.704611	0.875541	0.634313	0.617754	0.529556	0.515969	0.437581	0.419442	0.610775	0.780618	0.690907	0.856117	0.9302	0.798383	0.508063	0.953246
190	0.877887	0.831658	0.690039	0.672482	0.64111	0.871837	0.630704	0.622015	0.512968	0.509591	0.451129	0.421466	0.677342	0.822561	0.705931	0.851852	0.871782	0.745112	0.485295	0.943769
191	0.906679	0.849137	0.642929	0.659862	0.600032	0.820148	0.65898	0.555183	0.523677	0.529631	0.440586	0.411761	0.671179	0.843626	0.716202	0.875991	0.906124	0.753096	0.511404	0.959684
192	0.913346	0.828859	0.640072	0.66099	0.659126	0.871874	0.628599	0.525022	0.482846	0.498877	0.454006	0.382685	0.6993	0.829038	0.698376	0.839151	0.882658	0.798916	0.53296	0.955749
193	0.859131	0.819958	0.65876	0.652061	0.619037	0.763556	0.589893	0.568713	0.508069	0.475891	0.439048	0.369846	0.694584	0.836172	0.689263	0.844728	0.920515	0.787438	0.52938	0.958988
194	0.840897	0.850858	0.613632	0.652025	0.592261	0.860524	0.591513	0.561834	0.509848	0.463219	0.43162	0.402267	0.721626	0.858682	0.763612	0.856039	0.794707	0.78062	0.528359	0.962738
195	0.862303	0.84936	0.635836	0.665864	0.545524	0.794141	0.629475	0.572958	0.537499	0.478077	0.429814	0.402974	0.727597	0.870229	0.710401	0.870998	0.877395	0.802245	0.533123	0.952687
196	0.882545	0.822114	0.66227	0.647567	0.5704	0.794812	0.636504	0.575909	0.507867	0.499546	0.427626	0.425696	0.702189	0.874763	0.702245	0.850904	0.896542	0.788158	0.531446	0.966184
197	0.896913	0.839353	0.645829	0.663042	0.539605	0.773701	0.636995	0.575073	0.555051	0.503128	0.445438	0.424999	0.759752	0.869496	0.676585	0.850542	0.890638	0.813931	0.538115	0.9244
198	0.896498	0.814034	0.650335	0.659369	0.549579	0.804436	0.698044	0.595567	0.523018	0.486223	0.440233	0.445828	0.764279	0.852051	0.699988	0.866144	0.849282	0.860014	0.558555	0.922834
199	0.917797	0.836911	0.667135	0.657872	0.474208	0.774036	0.662965	0.592641	0.531989	0.461172	0.437556	0.460532	0.759651	0.861143	0.709588	0.831917	0.831356	0.862783	0.529879	0.927279
200	0.918049	0.793095	0.673428	0.646513	0.482099	0.878969	0.628913	0.625302	0.554061	0.482798	0.456022	0.436375	0.727438	0.851146	0.6757	0.855079	0.822118	0.821033	0.585009	0.919103
201	0.9154	0.769433	0.677667	0.647086	0.526586	0.860387	0.674679	0.622807	0.571628	0.478089	0.445429	0.436883	0.736859	0.856298	0.706691	0.863605	0.882671	0.826123	0.542981	0.902942
202	0.875078	0.848272	0.634487	0.645626	0.549586	0.838448	0.711729	0.532104	0.546722	0.504437	0.462345	0.450435	0.742923	0.851513	0.700551	0.86703	0.681162	0.787585	0.532765	0.936579
203	0.907323	0.886753	0.654984	0.661347	0.540138	0.744369	0.624711	0.555588	0.533873	0.530043	0.441975	0.48191	0.723263	0.862226	0.690518	0.857676	0.804955	0.779189	0.539499	0.937053
204	0.913593	0.850007	0.6298	0.664777	0.564701	0.762036	0.645579	0.595785	0.57787	0.532133	0.443301	0.488476	0.724455	0.846593	0.692344	0.830665	0.780663	0.795565	0.58715	0.954655
205	0.88013	0.868393	0.637391	0.68015	0.604893	0.73457	0.688459	0.594221	0.565554	0.529382	0.425643	0.496464	0.76349	0.88383	0.692548	0.84145	0.673932	0.748599	0.585986	0.877874
206	0.884609	0.831122	0.618136	0.673291	0.635871	0.742618	0.671363	0.539483	0.60069	0.565304	0.467732	0.468009	0.742073	0.83991	0.685381	0.872431	0.776891	0.800699	0.605343	0.929276
207	0.874617	0.84414	0.667322	0.684384	0.682725	0.74573	0.57245	0.536428	0.584552	0.533907	0.443583	0.50447	0.734947	0.879204	0.678017	0.852975	0.78279	0.731724	0.609641	0.920528
208	0.892131	0.876282	0.633094	0.695349	0.691163	0.746299	0.633895	0.619553	0.59375	0.52655	0.438616	0.498105	0.71377	0.853748	0.676742	0.850567	0.749319	0.757991	0.63404	0.921904
209	0.87027	0.821494	0.592849	0.694196	0.704911	0.824242	0.573234	0.583397	0.606534	0.530689	0.474842	0.500642	0.729042	0.883559	0.679782	0.867884	0.753731	0.755523	0.649585	0.93124
210	0.87146	0.823789	0.621522	0.739943	0.716058	0.783651	0.612274	0.570583	0.602645	0.543576	0.495042	0.53242	0.743366	0.88905	0.672664	0.851953	0.821782	0.726613	0.650455	0.909624
211	0.854909	0.877891	0.592966	0.767043	0.712266	0.813786	0.632485	0.589142	0.602607	0.622072	0.489845	0.523803	0.733912	0.870262	0.658812	0.821521	0.613228	0.743007	0.649693	0.908953
212	0.838567	0.825724	0.638564	0.755269	0.722687	0.795876	0.583898	0.603957	0.545319	0.585411	0.537291	0.4876	0.754913	0.855672	0.668431	0.855427	0.670419	0.742918	0.624075	0.91156
213	0.856176	0.824003	0.648689	0.744323	0.630492	0.79178	0.562633	0.57812	0.556687	0.576921	0.557835	0.467377	0.742911	0.855517	0.669848	0.838298	0.622825	0.756782	0.611199	0.90451
214	0.880942	0.789944	0.651324	0.75837	0.629558	0.79705	0.754577	0.598857	0.540617	0.609174	0.598519	0.544041	0.772392	0.861429	0.689346	0.807488	0.682333	0.761627	0.622064	0.859596
215	0.875888	0.809554	0.663689	0.769012	0.618589	0.840917	0.742189	0.581053	0.569402	0.604054	0.620192	0.547039	0.792829	0.873421	0.739268	0.839379	0.762653	0.773377	0.625667	0.859467
216	0.889056	0.795	0.624636	0.740693	0.6441	0.86202	0.789827	0.544106	0.581832	0.563909	0.619875	0.520872	0.814621	0.848139	0.767371	0.814735	0.701462	0.785285	0.624976	0.924004
217	0.934348	0.801989	0.607123	0.74071	0.632288	0.865645	0.784866	0.556664	0.564697	0.571102	0.656295	0.523987	0.803803	0.864764	0.709662	0.831626	0.72458	0.797458	0.647725	0.894292
218	0.93479	0.856991	0.620342	0.784279	0.638496	0.890329	0.698513	0.585217	0.615245	0.566071	0.602528	0.455584	0.741176	0.871307	0.711014	0.826435	0.69598	0.775263	0.659964	0.891427

## Sheet: 2I
	Cell 0	Cell 1	Cell 2	Cell 3	Cell 4	Cell 5	Cell 6	Cell 7	Cell 8
0	0.731354	0.679682	0.523966	0.767275	0.873819	0.714984	0.618268	0.672327	0.566444
1	0.702133	0.685301	0.534499	0.734936	0.884285	0.689725	0.691132	0.663079	0.473937
2	0.706765	0.720679	0.534381	0.856517	0.917362	0.77827	0.669228	0.656434	0.520102
3	0.667662	0.717154	0.529594	0.826178	0.898148	0.707419	0.664589	0.651169	0.543276
4	0.678605	0.680789	0.526779	0.772831	0.892063	0.642247	0.657759	0.625554	0.528125
5	0.714458	0.680871	0.536528	0.800797	0.906162	0.605902	0.662003	0.620635	0.522067
6	0.675718	0.692658	0.532608	0.78707	0.906136	0.672463	0.670309	0.698482	0.593552
7	0.672211	0.718175	0.55225	0.772061	0.850558	0.559469	0.708259	0.730103	0.553692
8	0.725653	0.756206	0.555743	0.830081	0.843087	0.667581	0.714414	0.776866	0.579165
9	0.783452	0.786169	0.573237	0.754995	0.888845	0.634719	0.798648	0.746894	0.569672
10	0.790889	0.757673	0.56464	0.836269	0.852659	0.666179	0.864109	0.753223	0.601054
11	0.817831	0.752749	0.558246	0.83951	0.846068	0.668752	0.869565	0.724689	0.582102
12	0.847143	0.740664	0.57491	0.828774	0.855766	0.67366	0.862741	0.767095	0.587873
13	0.862326	0.778389	0.545327	0.822746	0.817257	0.607474	0.88704	0.77251	0.589935
14	0.859108	0.825243	0.557904	0.835092	0.754603	0.630172	0.861562	0.762655	0.594738
15	0.826439	0.845779	0.554819	0.830958	0.884341	0.67316	0.843461	0.744935	0.539472
16	0.820941	0.871845	0.549535	0.875	0.908187	0.682058	0.88195	0.711233	0.539179
17	0.809563	0.843681	0.581841	0.868803	0.897685	0.690039	0.867852	0.71862	0.535681
18	0.79817	0.836306	0.547921	0.855506	0.846755	0.673849	0.84801	0.733039	0.52162
19	0.797077	0.872667	0.57198	0.729617	0.832466	0.717149	0.857198	0.713115	0.540298
20	0.783921	0.852194	0.537367	0.779737	0.790433	0.742397	0.842688	0.661473	0.542224
21	0.776033	0.851475	0.582896	0.916521	0.856706	0.735022	0.81329	0.672867	0.560912
22	0.782505	0.88936	0.551502	0.916754	0.846922	0.720307	0.804913	0.662144	0.550521
23	0.780766	0.904028	0.541541	0.935602	0.864338	0.69857	0.776224	0.629374	0.618243
24	0.794041	0.931538	0.571133	0.919857	0.859655	0.704306	0.833896	0.62024	0.609198
25	0.794118	0.919652	0.511463	0.906519	0.863514	0.816568	0.771099	0.587862	0.622097
26	0.767646	0.868952	0.506617	0.925608	0.855515	0.764261	0.838594	0.569585	0.62653
27	0.769399	0.942857	0.509262	0.897398	0.840705	0.788812	0.869483	0.579134	0.61874
28	0.802805	0.902595	0.512998	0.883393	0.83585	0.779948	0.796272	0.570572	0.622528
29	0.760214	0.92223	0.488722	0.91891	0.816262	0.803324	0.765276	0.571929	0.610667
30	0.772124	0.924515	0.496613	0.866462	0.823529	0.744085	0.768638	0.567126	0.624275
31	0.754038	0.927304	0.494102	0.910419	0.834684	0.742271	0.75349	0.548527	0.637936
32	0.749095	0.921268	0.501635	0.923986	0.795092	0.730164	0.787688	0.551675	0.643011
33	0.755544	0.886885	0.476015	0.947319	0.80315	0.716657	0.883513	0.597447	0.647881
34	0.751745	0.911852	0.497057	0.892654	0.855633	0.746803	0.800627	0.569767	0.643457
35	0.75483	0.92044	0.49866	0.924864	0.820064	0.735476	0.787316	0.620999	0.647814
36	0.745189	0.931601	0.478552	0.892701	0.816442	0.722271	0.790424	0.58664	0.638877
37	0.770882	0.903025	0.477765	0.877416	0.789002	0.760248	0.745875	0.579011	0.651013
38	0.786468	0.910495	0.495588	0.89437	0.782749	0.741014	0.812937	0.557763	0.648138
39	0.797717	0.881984	0.477374	0.832995	0.802515	0.687219	0.740707	0.5786	0.664691
40	0.801287	0.872788	0.476072	0.837229	0.809889	0.693109	0.773966	0.573125	0.643588
41	0.775416	0.885993	0.452245	0.874813	0.83062	0.684607	0.75197	0.611291	0.669368
42	0.790722	0.857182	0.458666	0.91026	0.793632	0.652738	0.74345	0.619686	0.670729
43	0.768528	0.888331	0.466452	0.911718	0.809783	0.634658	0.777426	0.677597	0.640299
44	0.788275	0.866022	0.446262	0.748573	0.800602	0.697709	0.755247	0.662539	0.679876
45	0.787925	0.867759	0.420788	0.828285	0.858808	0.683431	0.753834	0.666384	0.654153
46	0.825496	0.872261	0.426333	0.813885	0.804264	0.660677	0.754829	0.656285	0.686217
47	0.801899	0.875571	0.417961	0.84104	0.801714	0.62803	0.752452	0.639348	0.674356
48	0.824416	0.924082	0.421569	0.800353	0.840807	0.602404	0.752346	0.649615	0.685743
49	0.831291	0.935132	0.437027	0.836773	0.826923	0.684058	0.773253	0.634772	0.683908
50	0.826367	0.921245	0.416706	0.801917	0.811101	0.676193	0.783155	0.701551	0.668774
51	0.830851	0.885112	0.425698	0.826823	0.804133	0.761697	0.769447	0.686506	0.67948
52	0.817331	0.91878	0.409416	0.809158	0.802548	0.825857	0.847267	0.694978	0.648968
53	0.818922	0.941405	0.405496	0.815951	0.787592	0.837582	0.863719	0.706157	0.695314
54	0.827759	0.936678	0.41916	0.80071	0.815056	0.717857	0.753431	0.685858	0.674164
55	0.807875	0.953707	0.409807	0.755249	0.788571	0.742489	0.823081	0.672843	0.66617
56	0.789038	0.922846	0.422439	0.781655	0.834076	0.683349	0.807719	0.65975	0.666638
57	0.788873	0.905679	0.439698	0.774674	0.807775	0.665003	0.807107	0.701078	0.670756
58	0.755442	0.914886	0.4419	0.784444	0.811599	0.744283	0.823384	0.709542	0.665732
59	0.756687	0.932336	0.423628	0.748231	0.827279	0.800467	0.817259	0.70097	0.694927
60	0.738483	0.933588	0.412585	0.904355	0.838994	0.817826	0.819773	0.714354	0.681762
61	0.755055	0.930128	0.438033	0.830324	0.821516	0.863682	0.797459	0.689335	0.719546
62	0.769645	0.928332	0.446958	0.846465	0.827052	0.83385	0.860306	0.713799	0.691375
63	0.772361	0.913057	0.451272	0.822183	0.818976	0.86262	0.872264	0.724719	0.686766
64	0.775203	0.91897	0.466235	0.816952	0.820037	0.823137	0.83905	0.72951	0.663945
65	0.766953	0.930667	0.457712	0.843117	0.834439	0.765481	0.836019	0.645606	0.67111
66	0.760585	0.9445	0.450436	0.824317	0.844326	0.827586	0.836493	0.687862	0.621384
67	0.767241	0.941569	0.445854	0.907207	0.837231	0.85189	0.784949	0.700676	0.639696
68	0.720662	0.927854	0.441747	0.871939	0.823689	0.806329	0.847585	0.693231	0.619584
69	0.743827	0.927638	0.445842	0.892009	0.840328	0.779152	0.796978	0.692589	0.639659
70	0.748782	0.89339	0.444967	0.884488	0.841664	0.743376	0.831517	0.676552	0.650864
71	0.742463	0.903216	0.448848	0.874425	0.823814	0.701583	0.794009	0.714533	0.629028
72	0.765057	0.891113	0.453859	0.822684	0.801291	0.723108	0.780441	0.70113	0.583204
73	0.758539	0.829958	0.446199	0.831235	0.886608	0.727324	0.803352	0.714305	0.616746
74	0.756342	0.87929	0.444647	0.900846	0.826552	0.690601	0.796015	0.709179	0.614912
75	0.787749	0.862332	0.449973	0.910746	0.827954	0.697468	0.834442	0.624843	0.631993
76	0.766546	0.834458	0.44885	0.879571	0.854024	0.668741	0.811368	0.649931	0.62525
77	0.762859	0.839245	0.443091	0.858103	0.848411	0.654306	0.781525	0.65712	0.631565
78	0.79009	0.862745	0.459449	0.870629	0.820431	0.649615	0.782181	0.631166	0.593512
79	0.740391	0.853516	0.428921	0.858088	0.827566	0.641055	0.75253	0.615622	0.60084
80	0.700736	0.867833	0.383048	0.872004	0.825882	0.650034	0.762047	0.62098	0.597819
81	0.728728	0.844163	0.380011	0.786736	0.84707	0.596839	0.750807	0.592296	0.563779
82	0.744334	0.857441	0.380408	0.821008	0.843673	0.621699	0.770619	0.658552	0.594605
83	0.774107	0.85792	0.405278	0.834499	0.814651	0.646036	0.718388	0.572181	0.590152
84	0.750289	0.87206	0.464076	0.882601	0.830488	0.656015	0.681259	0.540951	0.592663
85	0.769772	0.856486	0.393277	0.916135	0.849541	0.636257	0.740586	0.529693	0.595913
86	0.766014	0.857186	0.456535	0.906572	0.819706	0.57019	0.67235	0.52736	0.613887
87	0.73942	0.874613	0.382945	0.930247	0.835255	0.539621	0.649673	0.544865	0.607305
88	0.747067	0.896385	0.360289	0.901665	0.840183	0.642907	0.673761	0.547694	0.601726
89	0.75023	0.869044	0.36672	0.908189	0.770062	0.630137	0.807587	0.52418	0.580467
90	0.735896	0.864568	0.418532	0.920567	0.77879	0.589574	0.876337	0.537174	0.630335
91	0.713412	0.882136	0.375739	0.921144	0.778368	0.581909	0.820892	0.507141	0.613525
92	0.713374	0.852368	0.348728	0.860918	0.88816	0.619457	0.856834	0.483918	0.593404
93	0.6562	0.854551	0.357651	0.88376	0.79516	0.586538	0.805388	0.490841	0.583244
94	0.712344	0.84789	0.356937	0.845631	0.77194	0.521974	0.702151	0.54867	0.597759
95	0.687108	0.884872	0.346817	0.808994	0.771866	0.627021	0.70669	0.486219	0.614276
96	0.721108	0.869632	0.371302	0.861919	0.77403	0.559456	0.71196	0.481373	0.561558
97	0.723385	0.849892	0.399079	0.901021	0.853193	0.598739	0.717881	0.457291	0.551351
98	0.725006	0.874838	0.326548	0.936759	0.905315	0.65339	0.73902	0.450609	0.532292
99	0.703688	0.870957	0.325318	0.875783	0.891616	0.619725	0.762809	0.440035	0.523873
100	0.74313	0.852141	0.332929	0.863372	0.883029	0.650632	0.746393	0.436718	0.565582
101	0.709155	0.853073	0.332852	0.893757	0.88455	0.645828	0.739879	0.440587	0.535487
102	0.688124	0.849479	0.329369	0.900987	0.891591	0.651037	0.729815	0.427975	0.547824
103	0.684288	0.844148	0.474244	0.919293	0.866471	0.614561	0.74826	0.416615	0.541032
104	0.705342	0.819686	0.325425	0.89444	0.840256	0.590765	0.801147	0.418619	0.563719
105	0.68122	0.844527	0.360898	0.713297	0.835982	0.594566	0.776775	0.424667	0.52044
106	0.698785	0.846316	0.474668	0.689627	0.833228	0.554203	0.826472	0.408452	0.50045
107	0.70527	0.866863	0.336047	0.716969	0.894737	0.52752	0.770343	0.411967	0.558606
108	0.716612	0.851546	0.345534	0.664962	0.881291	0.534291	0.766361	0.43608	0.588947
109	0.710105	0.868343	0.330852	0.678637	0.897116	0.604974	0.800124	0.414553	0.556086
110	0.737092	0.867821	0.336696	0.659753	0.875611	0.614952	0.786809	0.422544	0.553009
111	0.701252	0.883816	0.331188	0.884571	0.877132	0.57912	0.796543	0.402672	0.575236
112	0.698927	0.867981	0.341018	0.616903	0.869027	0.59703	0.789578	0.408012	0.565103
113	0.813294	0.886827	0.335229	0.906613	0.878715	0.56847	0.772919	0.406397	0.561589
114	0.759121	0.879241	0.340145	0.841287	0.900216	0.546706	0.796475	0.407365	0.546596
115	0.744667	0.894804	0.349212	0.879281	0.920074	0.578519	0.72716	0.413975	0.550314
116	0.753327	0.843895	0.337651	0.895421	0.90194	0.585571	0.737989	0.379096	0.560799
117	0.855434	0.848186	0.348336	0.866722	0.893211	0.564272	0.790504	0.388431	0.53331
118	0.87897	0.892834	0.343854	0.91277	0.888156	0.610953	0.760251	0.362896	0.537472
119	0.871643	0.870439	0.346971	0.896142	0.868386	0.589024	0.734454	0.362719	0.513345
120	0.843568	0.889417	0.344997	0.874717	0.881602	0.511643	0.747695	0.370453	0.496259
121	0.886543	0.866605	0.336054	0.885854	0.883825	0.534909	0.76639	0.350066	0.507759
122	0.886422	0.892049	0.444885	0.888605	0.840483	0.513729	0.756661	0.353312	0.475816
123	0.848303	0.842487	0.358049	0.896372	0.908995	0.58808	0.70672	0.33137	0.498823
124	0.810274	0.850551	0.416537	0.883371	0.878073	0.573923	0.758743	0.336633	0.492951
125	0.875667	0.858102	0.440653	0.862616	0.883594	0.563542	0.778165	0.353497	0.525999
126	0.856045	0.889973	0.460524	0.882533	0.891123	0.58401	0.783712	0.352372	0.511361
127	0.84881	0.881821	0.457401	0.866135	0.904963	0.513188	0.753455	0.334214	0.511393
128	0.824757	0.859689	0.377365	0.889205	0.883226	0.556413	0.79665	0.336368	0.489716
129	0.805462	0.832643	0.450421	0.91541	0.886747	0.53589	0.756003	0.343563	0.492179
130	0.82473	0.804103	0.424402	0.844504	0.86785	0.498265	0.693297	0.340045	0.512113
131	0.797141	0.819731	0.408561	0.882521	0.876044	0.499503	0.713735	0.337043	0.500425
132	0.816047	0.801254	0.446183	0.864314	0.847323	0.497414	0.672906	0.344457	0.484733
133	0.817875	0.827326	0.398139	0.867755	0.842761	0.508984	0.633214	0.343029	0.472613
134	0.833838	0.819795	0.399618	0.882137	0.858184	0.486012	0.585112	0.370744	0.528474
135	0.789864	0.818378	0.421819	0.818607	0.884655	0.53029	0.626504	0.335468	0.497489
136	0.859336	0.856515	0.388261	0.794677	0.872789	0.527157	0.619748	0.327101	0.475902
137	0.887853	0.843064	0.432669	0.806622	0.907895	0.535479	0.644075	0.319221	0.474341
138	0.849241	0.839612	0.420387	0.853767	0.886662	0.585316	0.619315	0.294262	0.493375
139	0.848518	0.865499	0.391547	0.854701	0.856153	0.507695	0.619315	0.290095	0.519079
140	0.860511	0.864129	0.406022	0.820903	0.856201	0.575185	0.612444	0.284156	0.512517
141	0.86935	0.888616	0.386498	0.822827	0.861093	0.568237	0.604539	0.290511	0.502935
142	0.885621	0.886061	0.395139	0.838368	0.852059	0.567138	0.615856	0.292777	0.489254
143	0.83187	0.873771	0.391514	0.854985	0.880896	0.561718	0.647681	0.286772	0.52726
144	0.872891	0.872523	0.402165	0.867527	0.896017	0.541525	0.591237	0.279641	0.519506
145	0.808475	0.888568	0.409971	0.85512	0.9025	0.587043	0.599453	0.282549	0.533481
146	0.860982	0.87163	0.421766	0.880034	0.884251	0.59429	0.593508	0.285547	0.537639
147	0.771039	0.853141	0.423991	0.861036	0.885883	0.59239	0.64237	0.274975	0.497362
148	0.863611	0.906542	0.433538	0.879411	0.887621	0.654754	0.616874	0.292494	0.485526
149	0.848302	0.873203	0.4494	0.873669	0.874233	0.619068	0.608417	0.292112	0.497361
150	0.882988	0.886957	0.455356	0.875667	0.831853	0.564465	0.590462	0.297467	0.500653
151	0.734578	0.83629	0.444623	0.883492	0.861897	0.562654	0.598808	0.294599	0.524123
152	0.927083	0.786435	0.475684	0.893298	0.872476	0.476668	0.605278	0.31922	0.519502
153	0.88854	0.829728	0.461314	0.88547	0.875512	0.545033	0.607221	0.332072	0.523188
154	0.909752	0.839488	0.446379	0.901716	0.861737	0.548859	0.624836	0.339848	0.522776
155	0.867017	0.82858	0.395542	0.921587	0.861977	0.575531	0.613013	0.341663	0.515466
156	0.84959	0.804539	0.413313	0.895833	0.824534	0.54174	0.632623	0.34056	0.50578
157	0.850356	0.810984	0.392431	0.906595	0.849903	0.511524	0.615741	0.35752	0.527914
158	0.864033	0.778594	0.3839	0.886297	0.847276	0.600971	0.581926	0.37402	0.511312
159	0.858667	0.800055	0.411721	0.82959	0.85553	0.636648	0.586756	0.379119	0.520952
160	0.846529	0.83651	0.417691	0.907293	0.873235	0.556377	0.558471	0.377654	0.496152
161	0.849307	0.856599	0.402062	0.899763	0.877957	0.517538	0.560197	0.389491	0.537564
162	0.827725	0.869606	0.426394	0.885947	0.845117	0.540522	0.579319	0.396383	0.554795
163	0.920328	0.85534	0.418932	0.88267	0.861886	0.57192	0.561205	0.390107	0.560114
164	0.92663	0.859847	0.416913	0.869491	0.768678	0.577079	0.583277	0.385387	0.521737
165	0.849776	0.846582	0.429838	0.861752	0.79189	0.542022	0.570898	0.391918	0.530301
166	0.84922	0.848654	0.458767	0.917348	0.793911	0.482753	0.584052	0.396064	0.518473
167	0.870571	0.856742	0.462069	0.893247	0.812874	0.546207	0.554266	0.397169	0.536483
168	0.863385	0.866071	0.441891	0.903625	0.820999	0.546799	0.525582	0.40285	0.539058
169	0.883961	0.879221	0.452097	0.885615	0.900407	0.511234	0.514178	0.401366	0.532543
170	0.888821	0.870906	0.448783	0.904564	0.865811	0.52851	0.509308	0.406787	0.530259
171	0.862293	0.885962	0.425486	0.838152	0.890933	0.515002	0.52187	0.383612	0.5203
172	0.865344	0.831493	0.444353	0.906373	0.834672	0.510237	0.514034	0.38869	0.538578
173	0.901203	0.859734	0.446556	0.849198	0.803035	0.554239	0.496933	0.388058	0.548268
174	0.897979	0.880546	0.46147	0.909229	0.78614	0.50363	0.492765	0.369386	0.523522
175	0.854688	0.848815	0.457243	0.85143	0.857098	0.554249	0.491267	0.361455	0.525369
176	0.824909	0.833689	0.44271	0.872074	0.807267	0.544098	0.514759	0.364391	0.52572
177	0.84222	0.811878	0.421122	0.887345	0.848457	0.513659	0.479617	0.359436	0.520748
178	0.815844	0.840575	0.452746	0.88829	0.85468	0.566461	0.456718	0.362159	0.534898
179	0.829588	0.869258	0.475421	0.859234	0.85768	0.575915	0.487499	0.349647	0.531343
180	0.888889	0.839409	0.462069	0.841991	0.866015	0.543954	0.442313	0.367757	0.542141
181	0.867525	0.856904	0.482003	0.849931	0.886571	0.542109	0.439372	0.358428	0.511164
182	0.887859	0.872952	0.479487	0.894434	0.866856	0.488573	0.45509	0.376217	0.516993
183	0.869994	0.872739	0.445852	0.891501	0.886341	0.532255	0.440278	0.377868	0.499584
184	0.860958	0.82911	0.478936	0.862678	0.879893	0.496906	0.448469	0.371562	0.517252
185	0.886306	0.860114	0.486294	0.822519	0.891413	0.507203	0.418572	0.371535	0.516941
186	0.867559	0.824273	0.503059	0.8896	0.888374	0.527334	0.415171	0.377365	0.50204
187	0.836608	0.857628	0.483744	0.876072	0.89782	0.528167	0.441493	0.400807	0.547209
188	0.820062	0.865601	0.457485	0.898939	0.899111	0.500757	0.443833	0.407114	0.507515
189	0.854808	0.877322	0.477377	0.900956	0.91216	0.487043	0.453961	0.40667	0.519352
190	0.809584	0.864418	0.482096	0.8627	0.902276	0.45199	0.460173	0.416475	0.502244
191	0.794275	0.851304	0.476548	0.863155	0.887026	0.511931	0.445799	0.393688	0.483828
192	0.789895	0.901668	0.484144	0.863846	0.89699	0.504357	0.468638	0.392604	0.497615
193	0.82827	0.864198	0.498705	0.848778	0.904324	0.479052	0.462581	0.401026	0.476527
194	0.588767	0.842512	0.474403	0.889686	0.88911	0.510592	0.47518	0.389381	0.524517
195	0.801029	0.866166	0.492389	0.861355	0.867853	0.530988	0.44325	0.472566	0.491006
196	0.795086	0.854073	0.489724	0.879557	0.890667	0.503909	0.451883	0.421179	0.480621
197	0.804314	0.836091	0.495745	0.853631	0.883405	0.513175	0.410933	0.447783	0.466191
198	0.840194	0.872671	0.490504	0.858807	0.915219	0.565517	0.423171	0.451292	0.514409
199	0.819777	0.829054	0.485934	0.863349	0.913105	0.5625	0.424043	0.446004	0.490917
200	0.832718	0.889038	0.497822	0.864694	0.901651	0.539791	0.413548	0.473221	0.520109
201	0.828121	0.868183	0.484866	0.909896	0.913496	0.593571	0.425701	0.499105	0.481825
202	0.880797	0.83124	0.508682	0.899077	0.919188	0.576756	0.444063	0.507856	0.508368
203	0.811879	0.823512	0.49746	0.882583	0.893043	0.55738	0.439728	0.495488	0.501308
204	0.910066	0.848889	0.49252	0.854394	0.915014	0.512145	0.425118	0.520237	0.493258
205	0.845781	0.854916	0.513106	0.876365	0.9253	0.524001	0.448799	0.55255	0.506916
206	0.908429	0.809732	0.498557	0.89764	0.904157	0.47608	0.438781	0.572261	0.491821
207	0.887822	0.807771	0.462908	0.852656	0.87749	0.470208	0.466476	0.56887	0.510841
208	0.901413	0.80941	0.46704	0.865612	0.875625	0.528044	0.462978	0.57262	0.494467
209	0.889612	0.813104	0.484388	0.825553	0.884992	0.544713	0.474893	0.603791	0.488417
210	0.863377	0.852611	0.474025	0.856037	0.859339	0.519335	0.474892	0.605784	0.495192
211	0.871512	0.840178	0.492045	0.842877	0.857893	0.545734	0.488459	0.6225	0.492564
212	0.894438	0.848171	0.506491	0.869716	0.860861	0.799619	0.469606	0.652686	0.5
213	0.901227	0.837173	0.484199	0.81731	0.826696	0.77164	0.464325	0.673973	0.479699
214	0.829335	0.847687	0.472129	0.830532	0.829506	0.50252	0.466559	0.690679	0.502575
215	0.866301	0.840984	0.465638	0.831799	0.87069	0.682952	0.517569	0.668176	0.496144
216	0.814087	0.869717	0.490451	0.85306	0.839235	0.668007	0.467305	0.676743	0.494265
217	0.82256	0.858783	0.469815	0.857733	0.813897	0.509775	0.475543	0.709323	0.506903
218	0.894309	0.869749	0.461902	0.851618	0.856626	0.543949	0.465475	0.672757	0.537636
