# Supplementary material for: Cells use molecular working memory to navigate in changing chemoattractant fields
Source: eLife. 2022 Jun 6;11:e76825. doi: 10.7554/eLife.76825 (PMC9282860; doi:10.7554/eLife.76825)
Supplement: Figure 3—figure supplement 1—source data 1. [file elife-76825-fig3-figsupp1-data1.xlsx]

## Sheet: Supplement 1B(top)
	60 - 1(*30)	60 - 2(*30)	60 - 3(*30)	60 - 4(*30)			180 - 1(*30)	180 - 2(*30)	180 - 3(*30)	180 - 4(*30)			300 - 1(*30)	300 - 2(*30)	300 - 3(*30)	300 - 4(*30)			305 - 1(*30)	305 - 2(*30)	305 - 3(*30)	305 - 4(*30)
0	0.440124	0.292301	0.822244	1.02154		0	0.447918	0.282521	0.694326	0.716201		0	0.420669	0.115236	0.575604	0.300176		0	0.122459	0.0510535	0.309631	0.094022
1	0.523989	0.337658	0.822244	0.551027		1	0.252927	0.100624	0.694326	0.882021		1	0.383809	0.15324	0.611291	0.498164		1	0.209691	0.0678904	0.171895	0.189561
2	0.544787	0.315339	0.822244	0.629026		2	0.428606	0.161256	0.910956	0.495696		2	0.219403	0.268476	0.575604	1.04742		2	0.069897	0.0336736	0.103578	0.189561
3	0.544787	0.449971	0.597561	1.49457		3	0.46723	0.362504	0.780423	0.936706		3	0.456943	0.15324	0.863406	0.699345		3	0.122459	0.0336736	0.0683173	0.047011
4	0.650122	0.382295	0.745756	0.392512		4	0.447918	0.161256	0.651278	0.495696		4	0.310675	0.134238	0.287802	0.598755		4	0.122459	0.0336736	0.207156	0.236572
5	0.587055	0.359976	1.04693	0.629026		5	0.486542	0.221889	0.520745	0.77265		5	0.383809	0.268476	0.46739	0.549258		5	0.192356	0.0678904	0.171895	0.189561
6	0.377057	0.224625	0.896341	0.629026		6	0.505855	0.121265	1.08454	0.44101		6	0.256263	0.191243	0.719505	0.648252		6	0.0872314	0.0336736	0.275473	0.14255
7	0.482392	0.247664	0.745756	0.629026		7	0.505855	0.342508	0.694326	0.550381		7	0.438806	0.172242	0.755192	0.648252		7	0.296922	0.0510535	0.137736	0.047011
8	0.398527	0.337658	0.896341	0.943539		8	0.389359	0.201248	0.563793	0.827336		8	0.219403	0.22986	0.611291	0.648252		8	0.0872314	0.0168368	0.171895	0.14255
9	0.419325	0.315339	0.896341	0.629026		9	0.389359	0.201248	0.651278	0.60683		9	0.256263	0.191243	0.863406	1.24701		9	0.105125	0.0510535	0.241314	0.14255
10	0.691719	0.382295	0.597561	0.707025		10	0.330799	0.282521	0.955393	0.661516		10	0.438806	0.172242	0.683817	0.498164		10	0.122459	0.102107	0.0341586	0.236572
11	0.440124	0.247664	0.822244	0.865539		11	0.505855	0.26188	0.347163	0.827336		11	0.438806	0.191243	0.431703	0.798339		11	0.069897	0.0510535	0.275473	0.236572
12	0.587055	0.337658	0.671659	1.18005		12	0.311487	0.201248	0.43326	0.60683		12	0.493803	0.0956217	0.611291	0.748842		12	0.174463	0.0678904	0.0683173	0.14255
13	0.50319	0.337658	0.822244	0.707025		13	0.350111	0.181252	0.520745	0.936706		13	0.292537	0.191243	0.755192	0.847837		13	0.0872314	0.0510535	0.309631	0.426132
14	0.587055	0.269982	0.597561	0.943539		14	0.447918	0.121265	0.651278	0.827336		14	0.219403	0.07662	0.719505	0.648252		14	0.244919	0.0678904	0.137736	0.285099
15	0.523989	0.247664	0.372878	0.943539		15	0.408671	0.241885	0.737375	0.716201		15	0.146269	0.15324	0.539916	0.847837		15	0.227025	0.0336736	0.0683173	0.047011
16	0.523989	0.179988	0.523463	1.18005		16	0.408671	0.161256	0.304115	0.550381		16	0.347534	0.22986	0.431703	0.897334		16	0.157128	0.0336736	0.207156	0.14255
17	0.461593	0.404614	0.745756	0.314513		17	0.272863	0.181252	0.651278	0.77265		17	0.310675	0.172242	0.46739	0.498164		17	0.174463	0.0336736	0.137736	0.14255
18	0.607854	0.359976	0.822244	0.865539		18	0.52579	0.161256	0.60823	0.716201		18	0.383809	0.172242	0.46739	0.349673		18	0.209691	0.118944	0.137736	0.285099
19	0.67092	0.292301	1.34332	0.785024		19	0.505855	0.282521	0.82486	0.77265		19	0.310675	0.22986	0.646979	0.498164		19	0.139794	0	0	0.094022
20	0.482392	0.247664	1.12102	0.707025		20	0.252927	0.241885	0.955393	0.550381		20	0.420669	0.0956217	0.504229	0.748842		20	0.0872314	0.0168368	0.137736	0.14255
21	0.356259	0.315339	0.449366	1.10205		21	0.292175	0.241885	0.998441	0.991391		21	0.347534	0.191243	0.719505	0.948427		21	0.069897	0.0678904	0.103578	0.236572
22	0.440124	0.315339	0.745756	1.18005		22	0.389359	0.322513	0.477697	0.661516		22	0.347534	0.22986	0.359177	0.598755		22	0.279588	0.0168368	0.0683173	0.047011
23	0.377057	0.292301	0.745756	0.236514		23	0.330799	0.322513	0.910956	0.661516		23	0.475081	0.0576182	0.575604	0.349673		23	0.174463	0.118944	0.34379	0.14255
24	0.566257	0.315339	0.523463	0.551027		24	0.408671	0.181252	0.780423	0.716201		24	0.347534	0.15324	0.575604	0.699345		24	0.139794	0.0678904	0.171895	0.33211
25	0.50319	0.539965	0.523463	0.943539		25	0.272863	0.201248	0.563793	0.77265		25	0.420669	0.172242	0.46739	0.39917		25	0.0872314	0.0847272	0.0683173	0.14255
26	0.398527	0.247664	1.4198	1.25805		26	0.408671	0.181252	0.43326	1.10253		26	0.420669	0.268476	0.539916	0.448667		26	0.174463	0.102107	0.275473	0.189561
27	0.377057	0.15767	0.449366	0.943539		27	0.252927	0.181252	0.563793	0.77265		27	0.420669	0.191243	0.719505	0.448667		27	0.244919	0.0336736	0.241314	0.14255
28	0.482392	0.224625	0.372878	0.629026		28	0.330799	0.181252	0.477697	0.827336		28	0.438806	0.115236	0.539916	0.39917		28	0.244919	0.135781	0.309631	0.047011
29	0.712517	0.269982	1.26922	0.551027		29	0.350111	0.282521	0.520745	0.882021		29	0.328812	0.191243	0.792031	0.498164		29	0.122459	0.0510535	0.207156	0.14255
30	0.398527	0.224625	0.896341	1.02154		30	0.370046	0.181252	0.82486	0.44101		30	0.475081	0.172242	0.431703	0.549258		30	0.227025	0.102107	0.171895	0.094022
31	0.607854	0.472289	0.896341	0.865539		31	0.330799	0.181252	0.780423	0.550381		31	0.402531	0.07662	0.431703	0.598755		31	0.314257	0.0336736	0.0683173	0.33211
32	0.440124	0.15767	0.822244	0.551027		32	0.408671	0.141261	0.867908	0.661516		32	0.456943	0.22986	0.683817	0.39917		32	0.0872314	0.0510535	0.207156	0.189561
33	0.650122	0.427652	0.671659	0.707025		33	0.330799	0.241885	0.694326	0.716201		33	0.402531	0.15324	0.431703	0.997924		33	0.192356	0.0678904	0.34379	0.189561
34	0.377057	0.427652	0.745756	0.551027		34	0.350111	0.141261	0.563793	0.495696		34	0.456943	0.15324	0.287802	0.897334		34	0.209691	0.0678904	0.309631	0.14255
35	0.67092	0.224625	0.597561	1.02154		35	0.545102	0.322513	0.520745	0.936706		35	0.328812	0.268476	0.539916	0.448667		35	0.122459	0.0847272	0.171895	0.14255
36	0.293863	0.315339	0.896341	0.865539		36	0.408671	0.141261	0.780423	0.77265		36	0.328812	0.115236	0.646979	0.847837		36	0.157128	0.0168368	0.241314	0.189561
37	0.50319	0.292301	0.449366	1.10205		37	0.370046	0.201248	0.477697	0.827336		37	0.310675	0.15324	0.46739	0.199585		37	0.244919	0.0510535	0.207156	0.047011
38	0.461593	0.247664	0.597561	0.865539		38	0.408671	0.181252	0.347163	0.550381		38	0.310675	0.134238	0.504229	0.448667		38	0.174463	0.0168368	0.0341586	0.14255
39	0.272394	0.269982	0.372878	1.02154		39	0.272863	0.282521	0.780423	0.44101		39	0.383809	0.172242	0.611291	0.748842		39	0.209691	0.0510535	0.34379	0.189561
40	0.461593	0.337658	0.597561	0.551027		40	0.350111	0.201248	0.520745	0.991391		40	0.2744	0.07662	0.611291	0.648252		40	0.139794	0.152618	0.207156	0.379121
41	0.33546	0.224625	0.822244	0.707025		41	0.389359	0.201248	0.694326	0.661516		41	0.402531	0.191243	0.646979	0.948427		41	0.174463	0.0168368	0.137736	0.189561
42	0.398527	0.247664	0.372878	0.943539		42	0.389359	0.362504	0.347163	0.44101		42	0.292537	0.191243	0.539916	0.648252		42	0.0872314	0.0510535	0.241314	0.14255
43	0.356259	0.224625	0.896341	0.943539		43	0.447918	0.161256	0.563793	1.04784		43	0.328812	0.134238	0.46739	0.300176		43	0.192356	0.0336736	0.241314	0.094022
44	0.482392	0.337658	0.822244	0.865539		44	0.408671	0.121265	0.82486	0.936706		44	0.2744	0.210858	0.611291	0.648252		44	0.139794	0.0510535	0.137736	0.14255
45	0.419325	0.382295	0.597561	0.707025		45	0.311487	0.201248	0.737375	0.386325		45	0.438806	0.172242	0.539916	0.598755		45	0.192356	0.0678904	0.103578	0.236572
46	0.251595	0.269982	0.597561	0.943539		46	0.272863	0.0806282	0.390211	0.44101		46	0.383809	0.22986	0.539916	0.549258		46	0.0872314	0.0336736	0.309631	0.189561
47	0.419325	0.135351	0.449366	0.785024		47	0.389359	0.141261	0.737375	0.716201		47	0.23754	0.0956217	0.539916	0.300176		47	0.0872314	0.0336736	0.137736	0.285099
48	0.356259	0.292301	0.671659	0.629026		48	0.370046	0.161256	0.651278	0.936706		48	0.201266	0.22986	0.431703	0.648252		48	0.209691	0.0847272	0.137736	0.14255
49	0.314662	0.269982	0.523463	0.314513		49	0.272863	0.201248	0.694326	0.991391		49	0.146269	0.07662	0.719505	0.598755		49	0.209691	0	0.207156	0.189561
50	0.377057	0.224625	0.822244	0.707025		50	0.233615	0.181252	0.651278	0.936706		50	0.328812	0.210858	0.359177	0.748842		50	0.244919	0.0510535	0.103578	0.14255
51	0.50319	0.202307	0.970439	0.551027		51	0.408671	0.241885	0.780423	0.991391		51	0.475081	0.115236	0.792031	0.39917		51	0.192356	0.0336736	0.241314	0.14255
52	0.523989	0.112313	0.597561	0.473027		52	0.272863	0.181252	0.563793	0.716201		52	0.475081	0.0956217	0.539916	0.349673		52	0.105125	0.0847272	0.103578	0.047011
53	0.377057	0.247664	0.745756	1.18005		53	0.330799	0.221889	0.520745	0.827336		53	0.310675	0.191243	0.575604	0.448667		53	0.227025	0.0510535	0.275473	0.14255
54	0.398527	0.202307	1.04693	0.865539		54	0.330799	0.241885	0.780423	0.550381		54	0.201266	0.191243	0.504229	0.39917		54	0.139794	0.0847272	0.171895	0.379121
55	0.461593	0.292301	0.597561	1.18005		55	0.233615	0.201248	0.563793	0.77265		55	0.2744	0.134238	0.46739	0.249082		55	0.105125	0.0168368	0.171895	0.094022
56	0.356259	0.179988	0.523463	1.02154		56	0.350111	0.282521	0.694326	0.33164		56	0.438806	0.248862	0.719505	0.498164		56	0.192356	0.0847272	0.171895	0.236572
57	0.482392	0.292301	0.597561	0.473027		57	0.545102	0.100624	0.563793	0.44101		57	0.219403	0.0576182	0.323489	0.648252		57	0.192356	0.0678904	0.207156	0.094022
58	0.419325	0.0899941	0.597561	0.629026		58	0.252927	0.181252	0.694326	0.33164		58	0.420669	0.115236	0.46739	0.748842		58	0.139794	0.102107	0.275473	0.285099
59	0.356259	0.269982	0.745756	0.629026		59	0.428606	0.100624	0.651278	0.661516		59	0.347534	0.0956217	0.46739	0.549258		59	0.192356	0.0336736	0.207156	0.047011
60	0.293863	0.224625	0.671659	1.02154		60	0.370046	0.100624	0.737375	0.936706		60	0.365672	0.210858	0.396015	0.498164		60	0.139794	0.0510535	0.171895	0.14255
61	0.419325	0.0899941	0.745756	0.629026		61	0.252927	0.201248	0.390211	0.882021		61	0.2744	0.134238	0.504229	0.847837		61	0.069897	0.0336736	0.275473	0.14255
62	0.293863	0.224625	0.523463	0.785024		62	0.408671	0.0606324	0.347163	0.716201		62	0.201266	0.210858	0.504229	0.699345		62	0.157128	0.0510535	0.137736	0.236572
63	0.272394	0.269982	0.671659	0.707025		63	0.389359	0.121265	0.60823	0.936706		63	0.347534	0.15324	0.719505	0.448667		63	0.105125	0.0678904	0.137736	0.189561
64	0.377057	0.202307	0.372878	1.02154		64	0.370046	0.0399916	0.998441	0.77265		64	0.201266	0.191243	0.575604	0.39917		64	0.105125	0.0678904	0.103578	0.285099
65	0.398527	0.224625	0.896341	0.473027		65	0.214303	0.0806282	0.43326	0.77265		65	0.365672	0.134238	0.575604	0.448667		65	0.262253	0.0168368	0.207156	0.094022
66	0.377057	0.315339	0.523463	0.943539		66	0.194368	0.141261	0.737375	0.495696		66	0.256263	0.172242	0.683817	0.699345		66	0.174463	0.135781	0.103578	0.14255
67	0.209327	0.224625	0.597561	0.551027		67	0.311487	0.121265	0.43326	0.44101		67	0.292537	0.15324	0.755192	0.598755		67	0.069897	0.0678904	0.171895	0.189561
68	0.377057	0.0446371	0.822244	0.865539		68	0.564414	0.141261	0.520745	0.60683		68	0.493803	0.115236	0.252114	0.699345		68	0.139794	0.0678904	0.309631	0.285099
69	0.314662	0.315339	0.745756	1.18005		69	0.370046	0.161256	0.390211	0.60683		69	0.23754	0.115236	0.539916	0.798339		69	0.0872314	0.0336736	0.379051	0.189561
70	0.33546	0.202307	0.597561	0.392512		70	0.311487	0.221889	0.390211	0.991391		70	0.292537	0.191243	0.504229	0.699345		70	0.244919	0.0168368	0.275473	0.426132
71	0.440124	0.15767	0.597561	0.629026		71	0.233615	0.100624	0.43326	0.827336		71	0.365672	0.0956217	0.575604	0.847837		71	0.174463	0.118944	0.207156	0.285099
72	0.209327	0.135351	0.372878	0.629026		72	0.214303	0.141261	0.737375	0.44101		72	0.347534	0.0956217	0.396015	0.448667		72	0.174463	0.0847272	0.241314	0.189561
73	0.356259	0.179988	0.671659	0.707025		73	0.311487	0.201248	0.520745	0.44101		73	0.365672	0.0956217	0.504229	0.699345		73	0.105125	0.0336736	0.309631	0.285099
74	0.272394	0.224625	0.523463	0.629026		74	0.408671	0.181252	0.173582	0.33164		74	0.365672	0.268476	0.359177	0.39917		74	0.192356	0.0336736	0.241314	0.33211
75	0.272394	0.15767	0.523463	0.707025		75	0.311487	0.26188	0.694326	0.44101		75	0.328812	0.115236	0.504229	0.549258		75	0.157128	0.102107	0.171895	0.189561
76	0.314662	0.0899941	0.597561	0.785024		76	0.330799	0.181252	0.347163	0.882021		76	0.456943	0.0956217	0.396015	0.847837		76	0.139794	0.0168368	0.137736	0.236572
77	0.251595	0.247664	0.671659	0.473027		77	0.272863	0.121265	0.60823	0.716201		77	0.256263	0.15324	0.504229	0.748842		77	0.157128	0.118944	0.207156	0.236572
78	0.251595	0.202307	0.449366	0.392512		78	0.389359	0.141261	0.520745	0.60683		78	0.219403	0.115236	0.611291	0.549258		78	0.122459	0.0510535	0.137736	0.236572
79	0.398527	0.15767	0.523463	0.155998		79	0.292175	0.0399916	0.60823	0.827336		79	0.292537	0.115236	0.539916	0.549258		79	0.157128	0.102107	0.137736	0.189561
80	0.272394	0.112313	0.745756	1.10205		80	0.252927	0.181252	0.43326	0.495696		80	0.402531	0.134238	0.323489	0.549258		80	0.157128	0.0510535	0.0341586	0.285099
81	0.419325	0.112313	0.671659	0.707025		81	0.330799	0.121265	0.737375	0.550381		81	0.219403	0.0576182	0.646979	0.349673		81	0.174463	0.0678904	0.207156	0.236572
82	0.272394	0.179988	0.29878	0.551027		82	0.272863	0.121265	0.21663	0.495696		82	0.420669	0.134238	0.646979	0.249082		82	0.157128	0.0510535	0.103578	0.14255
83	0.272394	0.112313	0.523463	0.551027		83	0.292175	0.141261	0.563793	0.60683		83	0.292537	0.15324	0.431703	0.249082		83	0.105125	0.0168368	0.207156	0.14255
84	0.293863	0.112313	0.372878	0.392512		84	0.389359	0.181252	0.43326	0.60683		84	0.420669	0.0576182	0.539916	0.300176		84	0.122459	0.118944	0.171895	0.236572
85	0.314662	0.112313	0.671659	0.865539		85	0.292175	0.121265	0.390211	0.33164		85	0.328812	0.15324	0.575604	0.549258		85	0.209691	0.0168368	0.275473	0.236572
86	0.146932	0.247664	0.523463	0.314513		86	0.233615	0.141261	0.520745	1.10253		86	0.328812	0.191243	0.359177	0.498164		86	0.174463	0.0678904	0.275473	0.189561
87	0.209327	0.224625	0.896341	0.392512		87	0.233615	0.121265	0.520745	0.550381		87	0.2744	0.287478	0.359177	0.648252		87	0.174463	0.0510535	0.207156	0.189561
88	0.230797	0.0676756	0.148195	0.473027		88	0.252927	0.0806282	0.261067	0.220505		88	0.365672	0.15324	0.719505	0.39917		88	0.192356	0.0510535	0.207156	0.236572
89	0.356259	0.112313	0.449366	0.551027		89	0.428606	0.141261	0.520745	0.220505		89	0.347534	0.15324	0.396015	0.598755		89	0.105125	0.0678904	0.413209	0.14255
90	0.272394	0.0899941	0.523463	0.473027		90	0.175056	0.0806282	0.43326	0.550381		90	0.456943	0.134238	0.575604	0.39917		90	0.157128	0.135781	0.379051	0.236572
91	0.230797	0.337658	0.372878	0.551027		91	0.330799	0.342508	0.390211	0.661516		91	0.256263	0.134238	0.504229	0.648252		91	0.157128	0.0678904	0.275473	0
92	0.188529	0.112313	0.148195	0.629026		92	0.194368	0.0806282	0.520745	0.661516		92	0.201266	0.172242	0.646979	0.448667		92	0.174463	0.0847272	0.275473	0.189561
93	0.272394	0.0676756	0.29878	0.236514		93	0.214303	0.181252	0.43326	0.716201		93	0.292537	0.268476	0.359177	0.199585		93	0.157128	0.0168368	0.171895	0.14255
94	0.16773	0.202307	0.449366	0.707025		94	0.252927	0.0806282	0.563793	0.44101		94	0.420669	0.191243	0.611291	0.300176		94	0.139794	0.135781	0.275473	0.285099
95	0.209327	0.135351	0.671659	0.551027		95	0.194368	0.121265	0.477697	0.275191		95	0.292537	0.248862	0.719505	0.39917		95	0.209691	0.0678904	0.241314	0.285099
96	0.16773	0.135351	0.597561	0.629026		96	0.272863	0.100624	0.390211	0.33164		96	0.201266	0.0956217	0.539916	0.549258		96	0.157128	0.0168368	0.137736	0.236572
97	0.209327	0.15767	0.29878	0.707025		97	0.155743	0.100624	0.347163	0.550381		97	0.2744	0.210858	0.323489	0.300176		97	0.105125	0.0336736	0.207156	0.094022
98	0.126133	0.0899941	0.449366	0.629026		98	0.136431	0.161256	0.520745	0.550381		98	0.23754	0.134238	0.287802	0.798339		98	0.262253	0.0336736	0.34379	0.236572
99	0.146932	0.179988	0.29878	0.0779992		99	0.292175	0.100624	0.347163	0.661516		99	0.182543	0.07662	0.396015	0.300176		99	0.192356	0.0847272	0.103578	0.236572
100	0.188529	0.0446371	0.372878	0.473027		100	0.311487	0.100624	0.304115	0.386325		100	0.365672	0.0956217	0.504229	0.39917		100	0.192356	0.0678904	0.275473	0.189561
101	0.083865	0.112313	0.372878	0.551027		101	0.311487	0.141261	0.520745	0.220505		101	0.420669	0.172242	0.575604	0.249082		101	0.105125	0.0168368	0.309631	0.33211
102	0.188529	0.0676756	0.449366	0.785024		102	0.252927	0.0806282	0.21663	0.495696		102	0.310675	0.15324	0.323489	0.349673		102	0.209691	0.0847272	0.171895	0.379121
103	0.146932	0.0446371	0.148195	0.551027		103	0.272863	0.141261	0.173582	0.220505		103	0.201266	0.15324	0.396015	0.498164		103	0.139794	0.0510535	0.171895	0.14255
104	0.0630665	0.0899941	0.29878	1.02154		104	0.233615	0.100624	0.477697	0.220505		104	0.109994	0.172242	0.575604	0.300176		104	0.174463	0.135781	0.0341586	0.236572
105	0.209327	0.0446371	0.148195	0.392512		105	0.233615	0.181252	0.43326	0.33164		105	0.347534	0.0956217	0.611291	0.598755		105	0.174463	0.0336736	0.207156	0.33211
106	0.16773	0.112313	0.449366	0.314513		106	0.252927	0.100624	0.651278	0.16582		106	0.292537	0.07662	0.504229	0.598755		106	0.192356	0.0678904	0.171895	0.236572
107	0.377057	0.0446371	0.148195	0.155998		107	0.272863	0.121265	0.60823	0.44101		107	0.164406	0.172242	0.646979	0.349673		107	0.069897	0.186834	0.207156	0.189561
108	0.16773	0.112313	0.29878	0.392512		108	0.252927	0.141261	0.43326	0.44101		108	0.201266	0.172242	0.396015	0.300176		108	0.157128	0.102107	0.241314	0.236572
109	0.126133	0.0446371	0.372878	0.473027		109	0.272863	0.100624	0.477697	0.44101		109	0.201266	0.191243	0.683817	0.598755		109	0.139794	0.0678904	0.171895	0.047011
110	0.188529	0.0446371	0.896341	0.473027		110	0.311487	0.0606324	0.390211	0.109371		110	0.328812	0.134238	0.359177	0.648252		110	0.174463	0.0510535	0.137736	0.33211
111	0.126133	0.0446371	0.29878	0.314513		111	0.117119	0.201248	0.261067	0.827336		111	0.402531	0.0956217	0.46739	0.39917		111	0.209691	0.0678904	0.137736	0.189561
112	0.126133	0.112313	0.29878	0.314513		112	0.136431	0.100624	0.304115	0.33164		112	0.2744	0.0956217	0.323489	0.39917		112	0.122459	0.0168368	0.103578	0.379121
113	0.0207985	0.15767	0.224683	0.473027		113	0.117119	0.161256	0.43326	0.386325		113	0.383809	0.07662	0.396015	0.39917		113	0.174463	0.0678904	0.137736	0.14255
114	0.16773	0.0446371	0.896341	0.629026		114	0.311487	0.141261	0.60823	0.661516		114	0.383809	0.115236	0.646979	0.39917		114	0.227025	0.0847272	0.275473	0.14255
115	0.104664	0.0899941	0.29878	0.629026		115	0.175056	0.141261	0.21663	0.60683		115	0.347534	0.15324	0.323489	0.150088		115	0.192356	0.0678904	0.309631	0.189561
116	0.0415971	0.135351	0.372878	0.314513		116	0.155743	0.121265	0.173582	0.44101		116	0.328812	0.0956217	0.504229	0.498164		116	0.069897	0.0336736	0.241314	0.14255
117	0.104664	0.0446371	0.224683	0.314513		117	0.214303	0.0199958	0.520745	0.33164		117	0.292537	0.22986	0.431703	0.300176		117	0.105125	0.0336736	0.103578	0.14255
118	0.188529	0.0223185	0.523463	0.551027		118	0.252927	0.181252	0.780423	0.661516		118	0.256263	0.191243	0.323489	0.349673		118	0.122459	0.0847272	0.103578	0.189561
119	0.0207985	0.135351	0.224683	0.473027		119	0.155743	0.141261	0.347163	0.44101		119	0.219403	0.22986	0.46739	0.598755		119	0.227025	0.102107	0.103578	0.094022
120	0.0415971	0.0899941	0.224683	0.314513		120	0.330799	0.0199958	0.261067	0.33164		120	0.23754	0.115236	0.504229	0.699345		120	0.122459	0.102107	0.103578	0.379121
121	0.104664	0.0223185	0.449366	0.314513		121	0.408671	0.0606324	0.477697	0.220505		121	0.310675	0.268476	0.287802	0.349673		121	0.122459	0.0678904	0.275473	0.426132
122	0.104664	0.0446371	0.0740976	0.551027		122	0.0971839	0.100624	0.21663	0.33164		122	0.219403	0.134238	0.719505	0.498164		122	0.139794	0.0847272	0.0683173	0.189561
123	0.104664	0.0446371	0.449366	0.314513		123	0.136431	0.0606324	0.21663	0.495696		123	0.2744	0.134238	0.504229	0.300176		123	0.192356	0.102107	0.275473	0.14255
124	0.0415971	0.0223185	0.29878	0.392512		124	0.136431	0.201248	0.21663	0.33164		124	0.23754	0.134238	0.396015	0.498164		124	0.157128	0.0168368	0.137736	0.379121
125	0.16773	0.0223185	0.224683	0.392512		125	0.252927	0.0606324	0.21663	0.33164		125	0.109994	0.191243	0.323489	0.897334		125	0.157128	0.0510535	0.309631	0.094022
126	0.083865	0.0446371	0.449366	0.155998		126	0.155743	0.181252	0.261067	0.33164		126	0.456943	0.134238	0.359177	0.300176		126	0.105125	0.0678904	0.171895	0.14255
127	0.188529	0.135351	0.224683	0.785024		127	0.175056	0.0806282	0.347163	0.220505		127	0.2744	0.191243	0.396015	0.39917		127	0.192356	0.0510535	0.275473	0.189561
128	0.126133	0	0.224683	0.155998		128	0.194368	0.0399916	0.477697	0.220505		128	0.328812	0.115236	0.359177	0.39917		128	0.105125	0.0678904	0.207156	0.236572
129	0.209327	0.0676756	0.0740976	0.392512		129	0.214303	0.0399916	0.304115	0.275191		129	0.292537	0.115236	0.575604	0.39917		129	0.174463	0.0510535	0.275473	0.14255
130	0.104664	0.0223185	0.745756	0.236514		130	0.117119	0.0399916	0.43326	0.386325		130	0.219403	0.134238	0.539916	0.249082		130	0.174463	0.0847272	0.207156	0.094022
131	0.0630665	0.0223185	0.224683	0.392512		131	0.117119	0.0199958	0.130533	0.33164		131	0.23754	0.134238	0.359177	0.249082		131	0.122459	0.0847272	0.207156	0.236572
132	0.0415971	0.0223185	0.29878	0.155998		132	0.136431	0.0606324	0.43326	0.550381		132	0.128131	0.0190018	0.323489	0.249082		132	0.069897	0.0678904	0.171895	0.236572
133	0.083865	0.15767	0.29878	0.314513		133	0.214303	0.161256	0.304115	0.33164		133	0.328812	0.191243	0.431703	0.249082		133	0.174463	0.0678904	0.171895	0.094022
134	0.0415971	0.0223185	0	0.551027		134	0.292175	0.121265	0.477697	0.386325		134	0.365672	0.172242	0.396015	0.349673		134	0.069897	0.152618	0.275473	0.094022
135	0.104664	0.135351	0.449366	0.236514		135	0.252927	0.0806282	0.347163	0.275191		135	0.292537	0.172242	0.431703	0.498164		135	0.122459	0.152618	0.137736	0.047011
136	0.0415971	0.0223185	0.0740976	0.155998		136	0.233615	0.100624	0.390211	0.386325		136	0.164406	0.134238	0.216427	0.249082		136	0.209691	0.102107	0.275473	0.14255
137	0.083865	0.0899941	0.523463	0.236514		137	0.0778717	0.0806282	0.261067	0.16582		137	0.164406	0.172242	0.216427	0.249082		137	0.122459	0.0510535	0.275473	0.047011
138	0.083865	0.0223185	0.29878	0.155998		138	0.214303	0.0606324	0.304115	0.33164		138	0.310675	0.15324	0.287802	0.448667		138	0.069897	0.0336736	0.241314	0.14255
139	0.083865	0.0223185	0.148195	0.314513		139	0.194368	0.0399916	0.261067	0.275191		139	0.23754	0.134238	0.431703	0.249082		139	0.139794	0.0510535	0.137736	0.285099
140	0.0630665	0.0223185	0.449366	0.0779992		140	0.175056	0.121265	0.304115	0.44101		140	0.402531	0.134238	0.287802	0.498164		140	0.105125	0.0336736	0.207156	0.094022
141	0.188529	0.0446371	0.372878	0.236514		141	0.0585595	0.141261	0.261067	0.16582		141	0.23754	0.134238	0.46739	0.249082		141	0.139794	0.0678904	0.241314	0.236572
142	0.146932	0.0223185	0.224683	0.314513		142	0.0585595	0.121265	0.347163	0.220505		142	0.256263	0.07662	0.46739	0.199585		142	0.157128	0.0336736	0.309631	0.047011
143	0.0415971	0.0223185	0.148195	0.236514		143	0.155743	0.0399916	0.347163	0.16582		143	0.328812	0.172242	0.359177	0.498164		143	0.157128	0.0847272	0.137736	0.094022
144	0.0415971	0	0.148195	0		144	0.194368	0.0399916	0.520745	0.16582		144	0.328812	0.134238	0.539916	0.648252		144	0.0525625	0.0510535	0.379051	0.094022
145	0.0630665	0	0.148195	0.0779992		145	0.155743	0.181252	0.130533	0.33164		145	0.2744	0.134238	0.323489	0.249082		145	0.157128	0.102107	0.207156	0.094022
146	0.0415971	0.0446371	0.29878	0.155998		146	0.233615	0.141261	0.347163	0.0546853		146	0.182543	0.172242	0.323489	0.648252		146	0.227025	0.0510535	0.207156	0.236572
147	0.0630665	0	0.224683	0.236514		147	0.155743	0.141261	0.347163	0.33164		147	0.2744	0.115236	0.216427	0.249082		147	0.122459	0.0510535	0.275473	0.189561
148	0.104664	0.0446371	0.224683	0.314513		148	0.194368	0.121265	0.347163	0.275191		148	0.256263	0.172242	0.539916	0.498164		148	0.174463	0.0847272	0.103578	0.14255
149	0.0207985	0.0676756	0.148195	0.314513		149	0.117119	0.161256	0.390211	0.33164		149	0.256263	0.134238	0.431703	0.39917		149	0.0872314	0.118944	0.103578	0.094022
150	0.0415971	0.0223185	0	0.236514		150	0.175056	0.141261	0.173582	0.16582		150	0.292537	0.191243	0.396015	0.39917		150	0.209691	0.0510535	0.171895	0.426132
151	0.0207985	0.0223185	0.148195	0.0779992		151	0.194368	0.0199958	0.261067	0.220505		151	0.146269	0.07662	0.504229	0.0989941		151	0.0173344	0.0168368	0.207156	0.14255
152	0.0630665	0.0223185	0.224683	0.0779992		152	0.0778717	0.121265	0.130533	0.220505		152	0.164406	0.15324	0.216427	0.249082		152	0.105125	0.0678904	0.309631	0.094022
153	0.0630665	0.0223185	0.0740976	0.155998		153	0.175056	0.0606324	0.304115	0.220505		153	0.219403	0.191243	0.287802	0.199585		153	0.105125	0.0678904	0.103578	0.14255
154	0.126133	0	0.224683	0.155998		154	0.175056	0.0399916	0.477697	0.16582		154	0.164406	0.0956217	0.504229	0.349673		154	0.192356	0.0847272	0.207156	0.047011
155	0.0415971	0.0676756	0.0740976	0.0779992		155	0.0971839	0.100624	0.304115	0.60683		155	0.365672	0.134238	0.287802	0.598755		155	0.192356	0.0678904	0.207156	0.189561
156	0.083865	0.0223185	0.0740976	0.155998		156	0.0778717	0.0606324	0.261067	0.275191		156	0.256263	0.191243	0.396015	0.300176		156	0.139794	0.0847272	0.207156	0.285099
157	0.0415971	0	0.224683	0.155998		157	0.214303	0.100624	0.21663	0.109371		157	0.23754	0.0956217	0.0713749	0.39917		157	0.139794	0.118944	0.275473	0.189561
158	0.104664	0.0223185	0.148195	0.0779992		158	0.0971839	0.0399916	0.261067	0.33164		158	0.164406	0.15324	0.143901	0.448667		158	0.157128	0.102107	0.0683173	0.094022
159	0.0415971	0	0.148195	0.155998		159	0.155743	0.0606324	0.130533	0.386325		159	0.310675	0.15324	0.143901	0.300176		159	0.227025	0.0510535	0.207156	0.189561
160	0.083865	0.0223185	0.0740976	0.0779992		160	0.155743	0.0806282	0.21663	0.16582		160	0.292537	0.210858	0.287802	0.199585		160	0.122459	0.0678904	0.137736	0.189561
161	0.0207985	0.0223185	0.29878	0.0779992		161	0.155743	0.0806282	0.347163	0.16582		161	0.328812	0.0956217	0.143901	0.300176		161	0.157128	0.0678904	0.241314	0.094022
162	0.0415971	0.0223185	0.148195	0.155998		162	0.0971839	0.0399916	0.173582	0.33164		162	0.292537	0.115236	0.359177	0.349673		162	0.122459	0.0847272	0.207156	0.285099
163	0.0630665	0	0	0.236514		163	0.0386244	0.0399916	0.21663	0.109371		163	0.182543	0.191243	0.287802	0.448667		163	0.139794	0	0.207156	0.14255
164	0.0630665	0.0446371	0.372878	0.0779992		164	0.0971839	0.0606324	0.347163	0.386325		164	0.328812	0.134238	0.179588	0.249082		164	0.192356	0.0510535	0.309631	0.094022
165	0.0207985	0.0223185	0.0740976	0.155998		165	0.0778717	0.0606324	0.21663	0.16582		165	0.164406	0.115236	0.216427	0.199585		165	0.157128	0.152618	0.103578	0.14255
166	0.0630665	0	0	0.0779992		166	0.136431	0.0606324	0.261067	0.275191		166	0.201266	0.22986	0.431703	0.39917		166	0.105125	0.0678904	0.137736	0.14255
167	0.0415971	0.0223185	0.224683	0		167	0.117119	0.0199958	0.304115	0.220505		167	0.292537	0.15324	0.504229	0.150088		167	0.122459	0.0678904	0.309631	0.14255
168	0.0630665	0.0223185	0.148195	0.155998		168	0.0193122	0.121265	0.173582	0.220505		168	0.292537	0.115236	0.323489	0.349673		168	0.157128	0.102107	0.0683173	0.189561
169	0.083865	0.0446371	0.0740976	0.155998		169	0.0971839	0.0606324	0.21663	0.109371		169	0.0912716	0.07662	0.216427	0.199585		169	0.174463	0.102107	0.103578	0.426132
170	0.083865	0	0	0.236514		170	0.0778717	0.0806282	0.173582	0		170	0.182543	0.0576182	0.431703	0.150088		170	0.105125	0.0510535	0.241314	0.14255
171	0	0	0.148195	0.392512		171	0.175056	0.0199958	0.261067	0.33164		171	0.2744	0.0190018	0.323489	0.199585		171	0.122459	0.0336736	0.171895	0.189561
172	0.0630665	0	0.0740976	0.0779992		172	0.0971839	0.121265	0.173582	0.16582		172	0.256263	0.134238	0.46739	0.199585		172	0.174463	0.0168368	0.137736	0.236572
173	0.0207985	0	0.148195	0		173	0.117119	0.0606324	0.21663	0.0546853		173	0.256263	0.172242	0.216427	0.199585		173	0.122459	0.0678904	0.137736	0.285099
174	0.083865	0.0223185	0.0740976	0.155998		174	0.136431	0.0399916	0.173582	0.275191		174	0.292537	0.134238	0.323489	0.300176		174	0.122459	0.0510535	0.137736	0.189561
175	0.083865	0.0223185	0.0740976	0		175	0.0585595	0.0399916	0.130533	0.33164		175	0.347534	0.172242	0.287802	0.249082		175	0.174463	0.0510535	0.241314	0.047011
176	0.0630665	0	0.0740976	0.0779992		176	0.117119	0.0606324	0.173582	0.60683		176	0.23754	0.191243	0.287802	0.249082		176	0.105125	0.0510535	0.137736	0.047011
177	0.0207985	0.0223185	0.29878	0.0779992		177	0.0778717	0.0399916	0.261067	0.220505		177	0.256263	0.210858	0.252114	0.199585		177	0.105125	0.102107	0.241314	0.094022
178	0.0415971	0.0223185	0	0.0779992		178	0.117119	0.100624	0.0860965	0.16582		178	0.128131	0.134238	0.216427	0.39917		178	0.0872314	0.0336736	0.0683173	0.14255
179	0.0415971	0.0223185	0	0.0779992		179	0.136431	0.0606324	0.21663	0.275191		179	0.256263	0.15324	0.252114	0.249082		179	0.174463	0.0336736	0.103578	0.189561
180	0.0207985	0	0.224683	0		180	0.117119	0.0399916	0.0860965	0.220505		180	0.201266	0.15324	0.252114	0.300176		180	0.139794	0.0510535	0.241314	0.14255
181	0.0630665	0	0.224683	0.155998		181	0.155743	0.0806282	0.130533	0		181	0.164406	0.115236	0.252114	0.498164		181	0.122459	0.118944	0.103578	0.14255
182	0.0415971	0.0676756	0.0740976	0.0779992		182	0.0585595	0.0606324	0.21663	0.109371		182	0.146269	0.0956217	0.143901	0.199585		182	0.122459	0	0.171895	0.236572
183	0.0415971	0.0223185	0.0740976	0		183	0.175056	0.0606324	0.130533	0.109371		183	0.23754	0.0956217	0.323489	0.249082		183	0.0872314	0.135781	0.103578	0.14255
184	0.0415971	0	0.148195	0.0779992		184	0.136431	0	0.0860965	0.275191		184	0.310675	0.191243	0.216427	0.598755		184	0.139794	0.0510535	0.103578	0.236572
185	0.0415971	0.0446371	0.148195	0		185	0.136431	0.0199958	0.261067	0.16582		185	0.383809	0.07662	0.252114	0.300176		185	0.174463	0.118944	0.137736	0.236572
186	0	0.112313	0	0.155998		186	0.0971839	0.0606324	0.261067	0.0546853		186	0.219403	0.115236	0.252114	0.150088		186	0.105125	0.0510535	0.171895	0.285099
187	0.0415971	0.0446371	0.224683	0.155998		187	0.0778717	0.0606324	0.173582	0.16582		187	0.292537	0.172242	0.359177	0.249082		187	0.105125	0.0678904	0.241314	0.047011
188	0.0415971	0	0	0		188	0.175056	0.0606324	0.0430482	0.0546853		188	0.164406	0.248862	0.252114	0.39917		188	0.0872314	0.0168368	0.241314	0.14255
189	0.083865	0.112313	0.0740976	0.0779992		189	0.136431	0.0806282	0.173582	0		189	0.328812	0.0576182	0.252114	0.249082		189	0.139794	0.118944	0.0683173	0.094022
190	0.126133	0.0223185	0.0740976	0.473027		190	0.0778717	0.0199958	0.173582	0.220505		190	0.256263	0.0956217	0.179588	0.300176		190	0.157128	0.0678904	0	0.14255
191	0.0630665	0.0223185	0	0		191	0.155743	0.0606324	0.130533	0.0546853		191	0.2744	0.0380035	0.431703	0.300176		191	0.192356	0.0168368	0	0.33211
192	0.0207985	0.0223185	0.0740976	0.0779992		192	0.0585595	0.100624	0.173582	0.16582		192	0.182543	0.0380035	0.287802	0.249082		192	0.069897	0.0168368	0.207156	0.047011
193	0.0207985	0.0223185	0	0.155998		193	0.0778717	0.0606324	0.130533	0.109371		193	0.182543	0.0190018	0.287802	0.199585		193	0.069897	0.0336736	0.137736	0.236572
194	0.0415971	0	0	0.155998		194	0.0386244	0.100624	0.261067	0.220505		194	0.0362746	0.07662	0.108214	0.300176		194	0.0173344	0.0336736	0.0341586	0.33211
195	0	0.0223185	0	0.155998		195	0.0386244	0.0399916	0.173582	0.0546853		195	0.146269	0	0.252114	0.300176		195	0	0.0336736	0.0341586	0.094022
196	0.0207985	0	0.0740976	0		196	0.0386244	0	0.0860965	0.0546853		196	0.054997	0.0190018	0.216427	0.448667		196	0.0346689	0.0336736	0.103578	0.189561
197	0.0415971	0.0223185	0.148195	0		197	0	0.0399916	0.173582	0.220505		197	0	0.115236	0.252114	0.249082		197	0	0.0168368	0.241314	0.285099
198	0	0.0223185	0.0740976	0		198	0	0.0399916	0.0860965	0.0546853		198	0.0181373	0.0190018	0.108214	0.349673		198	0.0173344	0.0168368	0.171895	0.285099
199	0.0415971	0.0223185	0.0740976	0.155998		199	0	0.0199958	0.261067	0		199	0	0	0.396015	0.300176		199	0	0	0.171895	0.14255
200	0	0.0446371	0.224683	0.0779992		200	0.0386244	0.0199958	0	0		200	0.0362746	0	0.179588	0.39917		200	0.0173344	0	0.171895	0.189561
201	0.0207985	0	0	0		201	0.0386244	0	0.0860965	0.109371		201	0	0	0.216427	0.300176		201	0	0	0.0683173	0.189561
202	0.0415971	0	0	0		202	0	0.0199958	0	0.109371		202	0.0362746	0	0.252114	0.300176		202	0.0173344	0.0168368	0.103578	0.094022
203	0.0207985	0	0	0.0779992		203	0	0.0399916	0.261067	0.16582		203	0.0912716	0	0.216427	0.498164		203	0	0.0336736	0.103578	0.047011
204	0.0207985	0.0223185	0.148195	0.0779992		204	0	0.0199958	0.173582	0.16582		204	0.054997	0	0.179588	0.199585		204	0.0173344	0.0168368	0.0683173	0.189561
205	0.0207985	0.0446371	0.224683	0		205	0.0386244	0	0.130533	0.109371		205	0	0.0190018	0.323489	0.150088		205	0.0525625	0.0336736	0.171895	0.094022
206	0.0207985	0	0.148195	0.0779992		206	0	0.0199958	0.0860965	0.220505		206	0.0181373	0	0.0713749	0.300176		206	0	0	0	0.047011

## Sheet: Supplement 1B(bottom)
	0	1	2	3
0	14.3671	31.5406	5.5006	-55.1623
1	2.74025	-23.4557	19.2337	14.4373
2	1.17453	37.5016	10.4001	21.1136
3	100	100	100	100
4	100	100	100	100
5	100	100	100	100
6	100	100	100	100
7	100	100	100	100
8	100	100	100	100
9	100	100	100	98.5467
10	100	100	100	100
11	100	100	100	100
12	100	100	100	100
13	100	100	100	99.6015
14	100	100	100	98.0163
15	100	100	100	98.8166
16	100	100	100	100
17	100	100	99.6866	98.3601
18	100	100	100	100
19	100	100	100	100
20	100	100	100	100
21	100	100	100	100
22	100	100	100	98.3941
23	100	100	100	95.9096
24	100	100	100	97.9454
25	100	100	100	96.7808
26	100	100	100	99.4843
27	100	100	100	95.7781
28	100	100	98.7332	97.2546
29	100	100	100	96.6321
30	100	100	100	97.8087
31	100	100	100	99.1005
32	100	100	100	96.1012
33	100	100	100	95.0789
34	100	100	100	96.466
35	100	100	96.6707	100
36	100	100	100	94.2464
37	100	100	100	98.9774
38	100	100	100	97.9557
39	100	100	100	93.3818
40	100	100	100	98.6794
41	100	100	100	97.588
42	100	100	99.953	98.8239
43	100	100	99.4461	99.3038
44	100	100	99.0348	94.1852
45	100	100	99.4794	93.3396
46	100	100	99.0842	98.6032
47	100	100	99.0105	98.8388
48	100	100	100	96.9178
49	100	100	98.8006	97.5629
50	100	100	96.4061	96.1091
51	100	100	100	94.1147
52	100	100	100	95.4179
53	100	100	100	97.4952
54	100	100	96.5901	94.9968
55	100	100	100	97.8747
56	100	100	98.695	100
57	100	100	96.0331	97.8639
58	100	100	99.2005	96.1073
59	100	100	96.9491	98.4183
60	100	100	97.1602	98.5584
61	100	100	98.7744	94.546
62	100	100	100	98.5225
63	100	100	99.1351	95.0766
64	100	100	97.5942	100
65	100	100	96.3603	100
66	100	100	98.8961	96.17
67	100	100	99.121	98.3923
68	100	100	97.149	100
69	100	100	96.8315	97.1981
70	100	100	100	97.1247
71	100	100	100	97.8121
72	100	100	100	96.7956
73	100	100	99.4335	97.4717
74	100	100	100	93.9317
75	100	100	99.9948	97.0885
76	100	100	100	94.0595
77	100	100	100	95.7776
78	100	100	100	97.4312
79	100	100	100	97.8529
80	100	100	94.6254	98.1993
81	100	100	94.8874	95.8179
82	100	100	98.7105	98.5935
83	100	100	100	93.8103
84	100	100	97.0696	99.1945
85	100	100	100	97.8966
86	100	100	97.5847	100
87	100	100	98.9118	96.7623
88	100	100	98.7316	98.5431
89	100	100	95.4869	97.213
90	100	100	95.9584	97.0328
91	100	100	99.4046	96.2805
92	100	100	99.2156	98.8461
93	100	100	99.0961	93.8051
94	100	100	99.645	97.0079
95	100	100	97.4364	97.388
96	100	100	97.4348	95.1484
97	100	100	97.095	98.7322
98	100	100	99.9433	95.9671
99	100	100	100	100
100	100	100	99.9262	95.1351
101	100	100	97.4442	96.6687
102	100	100	98.5028	95.4429
103	100	100	100	97.8265
104	100	100	99.9385	96.637
105	100	100	96.1079	96.1
106	100	99.7105	95.456	95.3966
107	100	100	96.0503	93.605
108	100	100	93.2487	94.4491
109	100	100	97.7604	97.5674
110	100	100	96.104	94.9849
111	100	100	97.8034	98.2671
112	100	100	98.9866	95.5631
113	100	100	96.314	93.7251
114	100	100	96.0438	94.3693
115	99.648	100	95.4286	97.143
116	100	99.6932	94.9029	93.1672
117	100	100	97.5403	98.3447
118	100	100	97.0367	92.4447
119	99.6786	97.939	96.6523	94.3382
120	100	99.4161	97.3315	95.4735
121	98.7029	100	95.623	93.0971
122	98.2338	100	96.7753	95.8165
123	99.2431	99.719	93.7657	99.2574
124	99.2104	100	96.0558	96.323
125	100	95.0294	92.8096	99.5082
126	96.839	100	95.4118	94.8199
127	98.6758	98.2634	95.4335	92.3637
128	98.9029	98.249	94.4943	96.8869
129	98.5105	98.8932	94.7835	95.7017
130	98.8747	97.5826	97.4517	90.9415
131	100	96.3445	92.5133	97.371
132	100	95.5044	93.8042	91.3007
133	96.737	97.9572	94.1874	91.6974
134	97.1502	98.8277	94.6232	92.8219
135	97.1614	99.1921	93.5846	92.9571
136	98.2887	96.1937	92.5678	93.9538
137	94.9829	96.9309	92.3475	95.0507
138	96.9502	96.0043	93.2708	91.3727
139	95.5276	95.3483	91.0583	91.6897
140	94.2881	92.7987	93.5432	89.5845
141	96.2548	93.2629	92.4859	87.5274
142	95.1346	95.8735	92.6016	90.187
143	96.4071	93.0798	89.9381	90.257
144	94.5751	95.1098	90.9206	91.7275
145	95.3435	92.9749	89.3368	90.5568
146	91.267	93.2089	90.0651	90.6681
147	93.5412	93.3114	93.4094	90.5885
148	94.9873	93.7333	91.3621	89.6158
149	90.4333	89.8224	88.7965	90.1842
150	91.5398	91.5692	93.2527	90.5103
151	93.0499	93.208	91.2883	90.2543
152	91.2968	90.1611	88.7492	92.8817
153	90.1422	89.7328	89.0291	94.3704
154	93.3074	90.7195	84.4383	88.5468
155	89.532	92.8662	90.6018	91.0096
156	90.2753	89.7306	89.4066	87.7174
157	91.5393	90.0643	88.5992	88.325
158	88.3036	91.0098	86.5894	89.2883
159	90.57	89.9546	87.4317	88.7023
160	91.7725	90.8508	86.3447	90.5352
161	88.7839	91.9897	82.3891	87.622
162	90.5955	87.7634	88.5836	87.8308
163	89.7798	88.4643	84.2008	84.0661
164	88.8551	89.4782	86.0499	86.8074
165	86.0607	90.2109	87.9815	88.0216
166	85.704	89.507	82.4321	87.605
167	85.5265	85.4878	89.238	83.0843
168	87.7777	87.5762	87.7066	87.1137
169	86.8389	85.7248	85.8106	88.0116
170	88.1212	86.1569	85.7719	88.2323
171	88.0744	87.1241	89.3235	85.5589
172	85.482	86.7591	82.9875	86.873
173	87.8707	86.5397	81.8023	82.5017
174	85.5828	87.8247	82.4076	86.3727
175	83.6855	84.9177	83.1651	85.719
176	81.3729	85.7844	79.549	85.9276
177	84.0003	87.0636	82.9992	88.2802
178	81.9897	85.9551	85.3213	87.7937
179	82.6121	81.6923	82.2308	89.9721
180	81.3269	82.6786	80.7945	81.9839
181	84.849	82.9306	83.736	88.1553
182	80.4965	81.2022	81.2555	88.0395
183	83.2789	85.1634	83.61	83.7352
184	81.2588	80.714	81.9361	86.9741
185	84.1611	84.3922	82.9087	83.0542
186	79.9851	81.7619	77.9213	80.5383
187	79.9796	80.9311	76.2448	82.2114
188	78.4947	81.4296	82.935	82.4512
189	81.9318	86.5207	81.5366	82.3061
190	80.4025	80.1193	79.987	79.2244
191	80.6454	82.9874	76.5735	79.8008
192	79.9521	79.1437	79.1426	84.8566
193	80.4474	79.9044	75.1445	80.9267
194	77.1373	82.298	83.7272	77.0567
195	78.7022	81.5953	79.6644	81.3888
196	77.4129	77.0479	76.7475	85.9906
197	77.571	78.0581	79.4914	81.6371
198	76.1406	77.5993	75.4679	80.1729
199	77.3431	79.4529	73.0584	76.4108
200	78.1147	80.3935	78.4389	78.1715
201	75.244	76.7059	75.5345	80.2456
202	75.0481	74.4209	74.784	77.8396
203	79.5976	77.174	75.6284	76.5022
204	79.3232	76.4975	78.1578	78.1484
205	76.4439	78.246	75.3972	76.4189
206	77.6637	73.5189	78.997	80.4765
207	74.6453	74.4824	76.9942	77.2188
208	77.5991	76.2863	75.6387	79.62
209	78.1393	75.8164	70.6604	81.3428
210	76.8511	70.6082	71.8971	78.8463
211	78.0745	70.9243	69.2456	82.4003
212	76.5643	73.8154	69.0475	80.7879
213	73.471	69.6094	64.1889	76.9738
214	75.5574	75.6656	65.3251	75.5304
215	74.2394	70.9081	68.1881	77.3942
216	71.8037	74.2794	77.544	77.8552
217	74.3326	68.7185	73.0138	77.0068
218	73.3588	70.1031	73.9948	78.0969
219	74.7276	69.3839	76.2353	75.2515
220	72.5869	65.3218	76.0666	73.6456
221	74.5751	66.8046	78.3956	76.5304
222	72.9137	69.8036	71.4628	67.1157
223	73.1846	68.0852	69.9741	81.839
224	73.1897	68.5196	69.5949	67.8389
225	71.1117	63.3983	72.7408	74.4098
226	72.2866	66.1037	66.7279	73.1502
227	72.8595	66.7137	72.1573	73.019
228	73.3009	60.9231	71.6119	76.217
229	72.1154	65.6412	68.0856	76.683
230	71.0716	65.2394	70.8271	75.3261
231	70.9279	61.439	69.6689	73.7771
232	68.6713	58.6792	67.3983	72.5117
233	69.4378	58.8503	73.6331	72.2901
234	70.1709	61.3243	70.9224	64.7918
235	70.0007	63.2618	67.9666	68.359
236	67.3787	58.8669	65.9767	71.0705
237	70.605	60.2786	69.5194	71.3586
238	67.7299	60.6721	67.9968	71.5865
239	68.1542	56.562	66.7324	71.3105
240	71.3225	62.5161	70.2938	66.4911
241	69.9868	61.4244	69.4186	73.4804
242	66.9037	57.1808	65.933	70.4776
243	69.3729	60.8843	70.4149	72.0979
244	66.9412	59.6424	68.0878	69.9737
245	68.2312	58.2058	64.138	69.4552
246	66.628	58.6608	66.3154	64.4429
247	68.428	58.5601	70.48	66.7725
248	68.1774	57.4781	64.8258	72.3005
249	65.2788	56.2636	64.1027	66.7415
250	69.4554	54.4885	64.0523	70.401
251	67.3636	59.0015	68.45	70.6839
252	63.7751	55.3648	56.4159	65.927
253	68.2016	55.1029	64.5633	67.9553
254	64.8757	55.6518	65.7813	66.7972
255	69.1237	59.1488	70.8733	63.1239
256	68.5858	54.8975	61.1389	64.7493
257	67.8982	54.5621	60.667	69.1414
258	66.3314	57.6594	64.7174	68.9946
259	66.9866	60.0785	64.5154	64.727
260	68.7692	57.3281	67.5726	65.3516
261	65.233	62.2323	63.669	59.817
262	64.6338	56.6415	64.6502	65.0037
263	64.8325	54.4836	65.4191	62.6871
264	68.648	55.2125	61.773	67.2173
265	67.8599	58.5997	59.6053	68.6
266	69.8434	59.4884	56.7072	67.8035
267	70.5586	56.4949	63.6515	67.9371
268	63.7576	58.3359	64.5856	62.6081
269	69.2066	53.8529	61.3461	60.852
270	65.3058	54.1281	61.7421	67.2027
271	63.8587	57.8452	61.6767	61.3882
272	64.474	58.7395	69.0274	66.5458
273	65.3986	56.5381	62.9254	65.8463
274	63.2455	50.188	61.5688	65.1239
275	61.9671	54.9531	70.8768	64.5159
276	66.3347	51.0493	65.1479	62.6973
277	64.1161	57.7364	63.5589	65.0117
278	63.3412	54.4898	62.4874	66.9275
279	64.0603	56.5613	67.7802	68.3642
280	61.2274	58.0963	66.9818	67.0717
281	65.0365	53.5817	62.5601	63.6278
282	62.4408	58.5948	64.5767	67.1181
283	63.9733	56.1279	66.8301	56.7987
284	64.1201	51.5999	59.2864	63.8668
285	65.1399	58.4911	61.9516	60.7722
286	62.5124	58.2468	65.0708	63.7427
287	65.2667	58.1384	67.1931	60.6984
288	63.5774	56.8959	65.7292	73.3334
289	64.9703	58.3076	67.6779	61.4378
290	64.1344	52.6642	59.3177	58.6236
291	65.7799	55.2646	62.2525	61.985
292	65.7681	59.8885	60.2432	60.4706
293	68.9514	59.4592	57.0669	68.8691
294	66.1948	52.5058	59.212	61.3008
295	64.5211	56.0497	64.0556	60.2051
296	61.8857	56.6116	62.5808	56.5699
297	63.4431	54.1116	64.4479	54.9263
298	64.1595	57.2994	60.1728	51.0403
299	61.8541	54.4601	59.803	63.4068

## Sheet: Supplement 1C GradientMCF7
	X_Cell 0	Y_Cell 0	X_Cell 1	Y_Cell 1	X_Cell 2	Y_Cell 2	X_Cell 3	Y_Cell 3	X_Cell 4	Y_Cell 4	X_Cell 5	Y_Cell 5	X_Cell 6	Y_Cell 6	X_Cell 7	Y_Cell 7	X_Cell 8	Y_Cell 8	X_Cell 9	Y_Cell 9	X_Cell 10	Y_Cell 10	X_Cell 11	Y_Cell 11	X_Cell 12	Y_Cell 12	X_Cell 13	Y_Cell 13	X_Cell 14	Y_Cell 14	X_Cell 15	Y_Cell 15	X_Cell 16	Y_Cell 16	X_Cell 17	Y_Cell 17	X_Cell 18	Y_Cell 18	X_Cell 19	Y_Cell 19	X_Cell 20	Y_Cell 20	X_Cell 21	Y_Cell 21	X_Cell 22	Y_Cell 22	X_Cell 23	Y_Cell 23	X_Cell 24
0	0	0	0	0	0	0	0	0	0	0	0	0	0	0	0	0	0	0	0	0	0	0	0	0	0	0	0	0	0	0	0	0	0	0	0	0	0	0	0	0	0	0	0	0	0	0	0	0	0
1	-1.82	-0.4004	1.612	0	-1.656	-1.733	-1.128	1.653	-1.54	-1.328	-2.54	-1.933	-0.321	-7.007	-1.856	0.233	-0.549	2.008	-1.48	-0.157	0	0	13.503	-1.224	0.282	1.288	-0.783	0.235	-2.949	-1.486	-1.729	0.335	-2.275	2.275	-1.417	1.103	-0.418	0.067	0.043	-2.15	-1.89507	0.825825	-0.921375	-0.44135	-0.96915	-1.16252	-0.152425	1.58795	0.7644
2	-0.921375	-0.648375	0	0	-3.166	-2.311	-2.843	3.398	-2.676	-1.921	-2.973	-2.043	-2.611	-4.253	-2.981	-0.593	-0.14	-0.53	-1.742	0.782	-2.274	0	2.795	5.073	2.49	1.148	-1.341	0.064	0.689	-3.419	-2.118	1.486	-2.275	0	-1.326	0.809	0.349	-0.145	0.4	-1.13	0.54145	1.41732	-0.69615	0.038675	-2.02248	-1.50377	-2.02248	1.67212	-0.8827
3	-0.54145	-0.5824	1.612	0	-4.823	-2.787	-5.633	4.681	-4.198	-2.436	-2.203	-2.288	-3.445	-3.106	-4.482	-0.769	-0.053	0.489	-0.565	0.121	0	0	9.142	2.028	3.415	0.396	-2.226	-0.146	-0.541	-2.166	-1.897	1.459	-2.275	2.275	-1.884	1.027	-0.545	0.896	-0.83	-7.934	-1.25125	0.571025	-0.948675	0.275275	-1.20347	-3.24642	-2.6845	0.056875	-1.22168
4	-2.49112	-1.24215	1.612	0	-6.478	-2.517	-6.72	7.768	-5.468	-2.321	-3.21	-1.978	-4.145	-5.663	-5.18	0.16	0.256	-1.186	-0.836	0.315	0	0	-4.019	3.677	2.111	-2.882	-2.377	-0.706	-0.515	-4.354	-3.169	1.531	-2.275	2.275	-1.597	0.045	-2.635	-1.26	-1.058	-8.236	-2.59122	0.2912	-1.03285	-0.70525	-3.13495	-2.5298	-1.98152	0.5096	-4.1314
5	0.825825	0.848575	1.612	0	-8.139	-3.285	-8.341	9.779	-7.218	-2.83	-4.398	-1.562	-3.615	-4.905	-7.006	-0.727	0.099	2.007	-4.024	-0.044	0	0	9.184	0.545	2.407	-0.443	-2.862	-1.217	-0.438	-3.617	-4.282	1.536	-2.275	2.275	-0.915	-2.953	-3.372	-0.138	-1.042	-2.979	-2.15215	0.056875	-1.365	0.33215	-2.36145	-1.39002	-3.4489	-0.1365	-3.95395
6	-0.784875	-0.2457	3.224	1.612	-9.569	-3.326	-9.131	10.983	-8.747	-3.549	-6.357	-2.783	-5.22	-6.421	-7.896	-0.329	-0.803	-1.932	-3.567	-0.753	0	0	4.616	6.453	2.813	-0.177	-3.343	-0.356	-2.028	-5.243	-5.838	2.068	-4.55	2.275	-0.319	-2.362	-3.586	-0.508	-0.191	-10.381	-1.31267	-0.5642	-0.957775	0.0546	-3.76057	1.0101	-3.20775	-0.3913	-5.15515
7	1.02375	1.27855	1.612	1.612	-9.071	-3.142	-9.837	11.397	-8.605	-3.235	-7.848	-4.13	-6.817	-7.722	-7.374	-0.114	-0.623	2.948	-2.537	0.215	0	-2.275	10.509	0.183	3.173	0.186	-3.483	0.221	-2.199	-3.947	-5.921	2.14	-4.55	4.55	-1.51	-1.924	-5.23	-0.134	-0.989	-11.971	-1.8018	0.716625	-0.88725	-0.68705	-3.72417	-1.53563	-4.1769	-1.10792	-7.70543
8	0.3367	3.74693	1.612	1.612	-8.354	-4.076	-9.335	11.82	-8.082	-3.442	-7.428	-3.012	-5.398	-4.766	-7.932	0.092	-1.171	3.458	-3.97	0.113	0	0	14.539	-0.469	2.856	1.565	-4.096	1.181	-3.05	-5.996	-5.162	2.79	-4.55	4.55	-2.199	-1.727	-7.432	0.31	-0.956	-10.582	-1.91782	1.12157	-0.830375	0.2366	-4.84575	2.56393	-4.51815	-0.3458	-8.30375
9	-0.593775	3.77878	1.612	1.612	-9.135	-5.652	-9.387	10.804	-8.328	-4.385	-9.091	-1.939	-7.665	-3.919	-7.313	-0.44	-1.703	5.441	-3.153	2.717	0	0	1.954	4.91	3.97	2.103	-4.144	1.34	-2.992	-3.391	-5.89	2.565	-4.55	4.55	-5.154	-0.394	-8.596	1.011	-2.834	-12.603	-1.04877	3.54217	-1.46965	0.65975	-5.03685	1.56293	-3.8584	-0.912275	-9.20465
10	0.55055	5.78078	1.612	1.612	-8.77	-5.854	-7.266	12.269	-8.007	-4.272	-9.737	-1.93	-7.453	-4.486	-8.088	0.723	-1.071	7.721	-4.837	-0.786	0	2.275	14.652	0.592	3.684	3.245	-4.983	1.751	-4.453	-5.445	-5.712	2.874	-6.825	4.55	-5.953	-0.833	-11.305	0.797	-3.391	-14.993	-1.94967	4.61142	-0.511875	0.20475	-7.37327	-0.00455	-4.5955	-0.69615	-8.95667
11	0.461825	6.58385	0	3.224	-9.616	-7.224	-7.567	12.661	-9.063	-5.06	-10.257	-1.893	-6.331	-4.376	-8.598	-0.284	-1.293	7.689	-5.176	0.943	0	2.275	12.215	4.826	3.24	3.813	-4.89	2.337	-5.088	-0.841	-6.907	2.64	-6.825	4.55	-6.814	-1.829	-12.42	0.547	-6.265	-13.041	-2.16125	5.21657	-0.51415	0.498225	-9.83937	5.9878	-3.18727	-1.28993	-10.9132
12	2.36145	9.62097	0	3.224	-9.539	-7.669	-7.635	13.699	-9.647	-5.344	-10.202	-2.221	-8.874	-1.273	-9.775	-0.524	-1.337	7.283	-6.398	-0.315	0	4.55	9.045	4.163	2.699	4.474	-5.945	2.733	-4.954	1.159	-7.726	3.602	-6.825	4.55	-6.738	-1.051	-14.273	0.979	-8.444	-13.802	-4.6774	6.41323	-0.96915	0.484575	-9.47992	2.67768	-5.71935	-0.325325	-12.7832
13	0.698425	7.56665	1.612	1.612	-11.046	-8.916	-8.888	13.43	-10.296	-5.811	-12.27	-4.024	-7.944	-0.885	-10.792	-0.21	-1.087	11.068	-6.584	-0.593	-2.274	2.275	10.809	5.657	2.912	4.561	-6.702	1.651	-3.591	0.625	-7.1	2.01	-4.55	4.55	-8.082	-1.728	-15.868	1.063	-10.937	-15.704	-4.62052	9.5095	-0.2093	0.14105	-12.2486	3.43298	-7.55983	1.09883	-9.94175
14	0.99645	7.05022	1.612	1.612	-11.104	-9.99	-8.642	13.833	-10.547	-6.23	-11.778	-4.683	-7.95	0.674	-10.293	-0.227	-2.302	13.022	-7.531	-1.18	-2.274	2.275	10.598	2.999	1.997	4.874	-7.972	1.307	-4.3	2.032	-6.736	1.74	-6.825	6.825	-8.838	-3.009	-17.362	1.874	-12.101	-14.275	-3.7674	12.9402	-0.548275	0.27755	-14.1778	7.75548	-8.6632	-0.15015	-8.90662
15	1.6653	8.5358	1.612	1.612	-12.521	-11.015	-9.99	13.701	-11.994	-6.933	-10.674	-5.141	-9.457	-0.756	-11.646	-0.213	-2.631	8.919	-6.47	-0.097	-2.274	4.55	10.575	6.707	2.194	3.52	-8.81	0.714	-3.889	4.851	-6.888	2.763	-9.1	6.825	-9.383	-3.086	-17.816	1.975	-14.23	-16.235	-3.5854	11.3227	-0.1638	0.539175	-16.6439	11.2658	-7.7714	0.74165	-10.2739
16	2.11575	9.11137	0	4.836	-12.061	-11.726	-10.272	13.841	-11.896	-6.574	-11.313	-4.584	-8.116	0.53	-11.223	-0.622	-2.828	12.653	-5.435	0.78	-2.274	4.55	7.092	4.772	1.279	5.458	-8.661	1.211	-3.283	2.128	-8.909	5.043	-6.825	6.825	-9.85	-2.648	-18.623	2.129	-16.026	-15.222	-5.52597	14.4917	-0.006825	-0.0728	-15.156	11.8277	-7.45063	1.66303	-8.31512
17	1.37183	8.43798	3.224	3.224	-12.142	-11.506	-10.823	13.869	-12.87	-6.855	-11.522	-5.107	-9.524	-2.95	-11.737	-2.064	-4.742	11.939	-6.386	0.092	-2.274	6.825	8.52	9.257	4.312	4.409	-8.723	1.301	-3.688	3.765	-7.433	3.767	-6.825	6.825	-10.464	-3.627	-19.226	2.307	-18.474	-14.075	-3.7947	11.9437	0.229775	-0.81445	-17.4947	11.1475	-8.41295	1.55382	-7.7714
18	4.1041	8.06943	3.224	3.224	-11.664	-10.489	-11.214	14.703	-13.417	-6.492	-10.696	-5.674	-8.229	-3.17	-12.316	-2.252	-4.675	14.191	-6.53	-1.138	-2.274	4.55	8.246	12.522	3.83	4.45	-8.909	0.54	-4.718	6.78	-9.345	4.796	-6.825	6.825	-11.094	-4.549	-19.249	2.736	-18.139	-13.877	-6.1061	15.0127	0.15015	-0.052325	-18.3274	17.1535	-7.50522	2.83237	-8.60405
19	2.08163	8.21957	1.612	1.612	-11.369	-10.809	-10.639	15.216	-13.617	-6.44	-12.326	-4.762	-7.436	-1.116	-11.632	-2.233	-3.732	13.463	-6.012	-2.427	-2.274	4.55	8.459	12.002	3.915	4.546	-9.479	0.575	-2.386	9.22	-8.871	4.99	-9.1	9.1	-12.537	-4.985	-20.403	1.845	-16.574	-13.052	-7.28227	17.9952	0.15925	-0.39585	-19.3785	17.1057	-9.57093	3.95167	-7.50977
20	1.20348	9.52997	1.612	3.224	-10.9	-10.877	-10.711	15.613	-13.249	-7.077	-13.546	-4.395	-10.009	2.831	-12.844	-2.136	-6.856	12.809	-6.29	-0.927	-4.549	6.825	8.287	9.611	4.148	5.702	-10.224	0.961	-9.524	9.042	-8.946	5.563	-9.1	9.1	-12.271	-5.072	-20.363	3.615	-17.501	-9.985	-5.69432	16.198	-0.065975	0.075075	-14.899	21.2462	-10.6333	4.69787	-7.0525
21	2.10665	8.50395	1.612	1.612	-10.429	-9.73	-10.24	16.086	-13.18	-7.471	-14.059	-4.444	-7.802	1.353	-13.332	-2.191	-7.338	13.511	-6.559	-0.477	-2.274	6.825	13.873	10.91	4.218	6.627	-10.972	1.471	-9.926	9.989	-10.648	6.249	-9.1	9.1	-14.155	-5.504	-20.641	4.104	-21.354	-11.151	-8.76785	17.7336	-0.23205	-1.26718	-18.7278	23.8466	-12.9357	3.6946	-7.08435
22	2.57303	5.64882	1.612	0	-10.769	-8.86	-11.367	15.765	-14.511	-8.388	-15.138	-5.129	-8.992	2.058	-14.052	-3.069	-6.262	13.279	-6.771	-1.48	-4.549	6.825	9.532	14.617	5.568	6.811	-11.42	2.18	-5.687	11.012	-10.435	6.735	-6.825	11.375	-12.832	-5.282	-20.561	3.879	-20.255	-10.551	-6.23122	20.8367	0.45045	-0.9464	-18.2387	21.7285	-10.1897	6.9615	-6.54745
23	2.41605	9.919	1.612	1.612	-10.14	-7.808	-10.44	15.609	-14.48	-7.965	-15.906	-4.983	-8.814	5.73	-15.512	-2.064	-6.088	16.041	-6.885	-0.693	-4.549	6.825	5.549	13.661	6.442	5.706	-11.954	1.887	-5.306	12.072	-10.928	8.317	-6.825	11.375	-12.194	-6.232	-20.93	4.026	-21.926	-10.364	-7.6713	23.0344	0.316225	-0.5733	-18.4275	25.6666	-11.7072	6.1698	-5.8604
24	4.24515	7.54162	3.224	1.612	-9.782	-7.556	-9.527	14.794	-14.203	-8.157	-17.031	-5.349	-10.556	7.73	-13.789	-2.271	-6.893	15.026	-6.731	-0.275	-4.549	4.55	7.635	18.416	7.127	7.655	-12.725	2.907	-5.507	12.612	-10.727	8.714	-9.1	11.375	-11.94	-6.724	-21.531	5.105	-20.715	-9.035	-8.75875	22.1676	0.061425	-0.2366	-13.3451	25.9032	-14.1073	7.1981	-6.8068
25	3.68095	8.16043	1.612	1.612	-9.986	-6.516	-9.131	14.902	-14.304	-7.801	-17.317	-5.408	-11.086	10.226	-14.284	-2.627	-6.223	18.857	-7.802	-0.512	-4.549	2.275	7.252	18.46	5.322	6.481	-13.557	2.65	-6.978	12.384	-11.995	10.099	-9.1	11.375	-12.49	-7.741	-21.866	5.5	-21.885	-8.73	-9.98043	24.8999	0.1638	-0.443625	-17.9384	28.4125	-11.6867	6.63845	-6.8614
26	0.839475	8.11037	1.612	1.612	-9.235	-5.848	-8.862	14.411	-13.717	-8.089	-15.774	-5.968	-8.885	9.767	-13.898	-3.185	-7.101	17.551	-8.165	-1.136	-4.549	4.55	8.893	18.823	6.303	7.905	-13.888	3.09	-8.438	13.111	-14.302	12.22	-11.375	11.375	-13.54	-8.17	-22.216	4.891	-21.355	-8.352	-9.55727	22.6931	-0.634725	-0.743925	-18.6504	29.2861	-14.0072	8.94075	-7.46882
27	3.75375	9.5277	1.612	1.612	-8.769	-5.603	-8.762	14.05	-13.367	-8.353	-17.169	-5.155	-8.314	9.416	-13.81	-2.655	-7.874	19.326	-7.494	-1.449	-4.549	4.55	6.872	17.314	8.097	6.856	-14.435	3.228	-1.996	13.472	-13.376	11.565	-9.1	11.375	-14.772	-10.401	-21.937	5.844	-22.629	-7.257	-7.53935	25.6916	0.15015	-0.4004	-9.20465	21.7922	-14.4963	8.7815	-7.86468
28	2.5935	7.28228	1.612	1.612	-9.722	-5.034	-9.827	14.311	-13.388	-8.653	-15.385	-5.148	-7.186	6.809	-13.94	-3.593	-11.593	17.784	-7.135	-0.803	-4.549	4.55	10.805	18.256	7.178	6.73	-14.821	3.674	-1.589	14.938	-14.318	12.722	-11.375	13.65	-15.941	-13.577	-23.367	5.438	-20.611	-7.188	-10.5219	25.4413	0.520975	0.65975	-11.3477	30.7603	-14.2483	9.64373	-7.1253
29	4.8321	7.66447	3.224	0	-9.704	-5.145	-11.247	14.355	-13.239	-8.163	-16.258	-5.928	-8.485	9.838	-14.62	-3.538	-11.048	20.35	-8.088	-0.598	-4.549	4.55	8.029	16.746	7.042	8.163	-15.621	3.298	0.275	14.688	-14.12	12.999	-13.65	13.65	-16.281	-15.908	-22.206	6.236	-20.151	-6.861	-10.7426	26.9815	-0.520975	0.311675	-11.5729	30.2166	-16.4869	7.8351	-7.45972
30	2.76868	8.69732	3.224	1.612	-9.831	-5.33	-11.163	14.029	-12.665	-8.705	-15.988	-5.141	-9.032	9.436	-15.326	-4.027	-10.44	21.401	-9.298	-0.436	-4.549	6.825	2.831	18.563	7.31	9.74	-16.13	3.838	3.248	14.244	-14.24	13.537	-11.375	13.65	-14.852	-17.018	-22.538	6.296	-20.667	-5.164	-12.4169	24.2196	-0.288925	-0.530075	-14.2779	36.2999	-13.7865	9.18873	-7.55982
31	3.64683	5.96278	1.612	1.612	-10.523	-5.073	-10.137	13.503	-12.589	-8.194	-15.724	-5.119	-7.502	9.553	-15.745	-3.133	-10.278	22.927	-7.87	-1.087	-6.824	6.825	9.462	20.308	7.724	9.32	-16.739	3.544	5.332	14.036	-14.392	13.6	-13.65	13.65	-14.935	-17.974	-21.82	7.909	-18.22	-4.57	-12.4534	23.2209	0.389025	0.120575	-14.4326	33.9453	-14.8762	10.076	-7.58257
32	5.63063	4.97315	3.224	0	-12.383	-5.328	-8.894	12.766	-13.969	-8.199	-15.064	-4.517	-7.232	11.592	-15.429	-3.241	-10.297	23.502	-8.707	-0.487	-9.099	9.1	6.058	21.007	8.729	11.196	-17.566	4.346	-0.309	16.826	-14.743	14.518	-13.65	13.65	-14.209	-14.64	-22.67	9.113	-19.755	-5.034	-11.7299	25.5619	-0.389025	0.5005	-15.288	36.2954	-15.7862	10.7858	-7.30275
33	3.38748	3.28737	1.612	1.612	-12.883	-4.968	-5.451	12.213	-14.059	-7.999	-14.165	-4.94	-7.779	12.343	-15.376	-3.554	-10.861	24.031	-9.634	-0.227	-9.099	9.1	1.292	18.714	8.853	9.234	-17.257	4.069	4.313	16.362	-15.164	14.092	-13.65	13.65	-12.841	-13.214	-22.46	9.953	-17.013	-4.4	-10.4536	27.1749	-0.6188	0.470925	-12.4556	36.8436	-18.4275	13.22	-8.03758
34	3.65593	3.53308	1.612	0	-12.794	-3.577	-5.295	12.507	-14.395	-7.723	-12.754	-5.263	-6.819	9.278	-16.202	-3.526	-12.245	23.07	-9.303	-0.233	-11.374	9.1	5.479	18.581	9.064	10.347	-17.592	5.059	2.978	17.975	-15.317	16.119	-13.65	15.925	-11.276	-13.429	-20.957	11.232	-17.833	-3.087	-10.879	25.7075	0	0.0273	-13.427	35.5037	-17.1421	10.8381	-8.13085
35	6.18118	4.37937	1.612	1.612	-12.649	-3.84	-5.495	12.592	-14.244	-7.527	-11.606	-5.472	-3.791	8.454	-15.827	-2.651	-10.802	26.727	-9.589	-0.847	-13.649	9.1	5.803	15.701	10.043	11.48	-17.894	5.149	4.798	20.737	-15.097	15.857	-13.65	13.65	-9.954	-15.681	-20.307	11.37	-17.944	-3.405	-11.9369	27.6367	0.138775	-0.370825	-14.0709	36.2294	-16.9738	13.4225	-8.45618
36	3.67185	3.55355	0	1.612	-11.82	-3.45	-4.83	12.298	-13.008	-8.183	-12.442	-5.046	-5.686	9.43	-14.35	-2.711	-13.899	26.337	-10.085	0.965	-15.924	9.1	3.263	18.938	9.348	10.807	-18.357	4.697	5.774	20.17	-15.394	16.608	-15.925	13.65	-12.48	-14.301	-22.167	10.533	-17.639	-3.045	-11.5069	27.2408	-0.20475	0.67795	-14.9945	38.1791	-18.5276	14.0732	-9.21148
37	4.76613	5.47137	0	3.224	-10.167	-3.126	-3.627	13.013	-11.732	-8.013	-12.915	-5.226	-6.271	9.202	-15.668	-2.938	-12.426	28.625	-10.862	0.722	-18.199	6.825	4.099	20.548	10.288	11.59	-18.825	5.011	4.58	20.441	-14.424	15.79	-13.65	13.65	-12.161	-12.33	-22.144	10.227	-16.822	-2.588	-11.7117	27.8255	-0.689325	0.065975	-14.0822	39.3621	-18.1136	13.7524	-9.45945
38	2.1021	5.16197	0	1.612	-10.128	-3.578	-3.252	12.062	-12.392	-7.212	-12.584	-4.097	-5.365	11.96	-16.671	-3.089	-17.273	26.14	-9.329	-0.39	-18.199	6.825	6.196	20.448	10.989	13.38	-19.154	6.491	6.685	21.033	-15.323	16.468	-18.2	13.65	-12.643	-10.226	-20.091	12.386	-16.645	-2.291	-12.2623	27.2818	-0.015925	0.980525	-15.263	37.2759	-17.5858	16.8418	-10.7971
39	7.09345	3.36928	0	1.612	-10.108	-2.699	-1.674	11.305	-12.356	-6.789	-12.161	-4.292	-6.385	13.545	-16.634	-4.049	-14.087	29.12	-10.187	0.313	-18.199	6.825	7.605	18.053	10.764	13.623	-19.949	6.956	6.886	20.658	-15.897	18.137	-15.925	13.65	-13.14	-8.884	-20.586	11.713	-15.364	-0.829	-11.8801	26.0851	0.602875	0.1274	-16.7758	38.3156	-17.0648	16.7144	-11.2749
40	7.2345	4.24743	0	3.224	-10.134	-1.843	-0.798	11.609	-12.342	-7.187	-10.878	-3.098	-5.216	11.958	-16.754	-3.632	-14.654	28.533	-9.226	0.762	-20.474	9.1	6.573	21.522	9.464	14.612	-20.861	7.63	8.592	21.258	-15.343	18.822	-15.925	13.65	-13.618	-6.286	-21.059	10.994	-16.455	-0.473	-9.5095	29.5977	0.74165	0.1456	-17.265	40.7452	-17.3787	17.7928	-12.3623
41	4.28383	3.56948	0	3.224	-10.134	-2.22	-0.306	10.999	-12.648	-7.549	-10.488	-3.316	-4.033	10.704	-17.326	-4.732	-17.682	29.556	-10.285	1.532	-20.474	9.1	8.799	21.77	10.052	15.504	-21.367	8.907	8.635	22.718	-14.968	19.646	-15.925	15.925	-11.681	-5.006	-19.527	12.84	-16.175	0.293	-11.1134	27.366	1.52198	-0.4914	-12.5694	44.4239	-20.2384	18.2842	-13.1768
42	2.18855	3.95395	-1.612	4.836	-8.922	-0.621	1.231	11.671	-11.13	-7.721	-9.575	-1.969	-4.882	10.309	-15.669	-4.325	-13.952	31.278	-10.425	0.869	-20.474	9.1	9.511	19.567	9.121	15.129	-22.279	8.752	12.958	22.84	-14.51	19.153	-15.925	13.65	-11.323	-6.769	-19.886	12.482	-14.811	0.778	-11.1043	25.8645	0.2366	0.0728	-15.4882	40.4108	-17.6153	20.0223	-14.8853
43	4.2224	5.15515	0	3.224	-8.138	0.231	1.399	9.365	-10.713	-7.47	-10.726	-1.56	-3.997	12.657	-15.892	-2.761	-15.037	31.788	-11.045	2.156	-22.749	9.1	9.841	20.32	9.017	15.495	-23.004	10.373	14.713	24.147	-15.312	20.571	-18.2	13.65	-8.199	-3.281	-20.814	12.417	-14.176	0.609	-11.7981	25.687	0.85085	-0.21385	-12.9607	41.4869	-18.4867	21.7922	-13.857
44	1.74038	5.0232	-1.612	4.836	-7.458	1.168	1.676	8.523	-11.109	-7.547	-10.286	-1.565	-4.1	11.868	-17.929	-3.358	-14.506	31.968	-10.323	1.749	-22.749	9.1	11.128	21.952	9.418	16.168	-23.526	11.004	15.66	23.125	-16.593	20.985	-18.2	13.65	-8.732	-6.957	-21.132	12.7	-13.16	0.489	-13.1631	24.8498	0.8827	-0.5915	-15.404	40.7066	-14.7147	21.4601	-15.3153
45	2.58895	5.2325	-1.612	3.224	-7.1	3.022	1.454	10.773	-11.696	-7.145	-11.033	-2.356	-3.753	12.948	-17.652	-3.102	-16.704	30.878	-11.316	2.524	-22.749	9.1	6.184	21.308	8.75	17.174	-23.887	12.711	17.892	24.11	-16.612	22.15	-18.2	13.65	-9.772	-3.507	-20.948	14.003	-13.216	0.176	-11.8027	25.8963	1.30358	0.284375	-14.4417	43.1431	-18.2956	23.0116	-15.4541
46	3.7674	5.69432	-1.612	4.836	-7.075	3.731	2.169	14.828	-11.896	-6.807	-11.783	-2.675	-3.659	12.242	-16.541	-3.491	-15.648	33.527	-10.81	-0.244	-25.024	11.375	11.607	22.098	8.469	17.139	-24.133	12.889	17.669	25.228	-16.16	21.733	-20.475	13.65	-9.881	-5.914	-20.934	13.316	-12.457	0.958	-11.6002	26.597	2.29775	1.14887	-14.6282	41.8031	-18.0498	23.0958	-17.4948
47	0.38675	4.59778	-1.612	4.836	-7.062	4.996	3.622	14.37	-10.518	-7.516	-12.641	-2.712	-4.749	12.457	-17.474	-2.729	-16.091	33.102	-10.765	0.907	-25.024	9.1	10.404	26.362	8.735	16.948	-24.877	13.733	19.202	26.306	-15.783	21.604	-18.2	11.375	-9.233	-1.972	-19.472	15.413	-11.796	2.047	-11.5866	26.2603	2.08845	0.9555	-16.3868	44.4057	-18.8143	24.1969	-18.4411
48	0.62335	5.19837	0	3.224	-8.23	4.791	3.57	13.053	-10.72	-6.995	-12.52	-3.327	-4.968	14.585	-19.082	-3	-20.031	32.852	-10.337	1.455	-25.024	11.375	8.842	28.387	9.334	17.477	-25.457	15.387	19.912	29.078	-17.785	23.168	-18.2	11.375	-9.302	-0.288	-19.483	14.504	-12.632	1.368	-12.5876	27.8005	2.23178	1.52652	-12.5011	44.4421	-21.3554	25.3503	-17.6995
49	3.5581	4.4772	-1.612	4.836	-9.177	4.409	4.851	14.36	-9.826	-7.509	-13.154	-3.244	-4.236	15.107	-19.481	-2.214	-19.398	33.54	-12.075	2.057	-27.299	11.375	12.107	29.567	8.967	17.047	-26.288	16.981	20.947	30.898	-18.056	23.493	-20.475	13.65	-6.75	0.743	-22.349	13.749	-10.99	3.962	-11.0633	27.8278	2.63445	1.44918	-13.8206	44.7697	-20.7139	26.8041	-19.3193
50	1.70625	4.19283	-1.612	4.836	-8.659	4.296	5.659	14.438	-9.544	-5.934	-12.674	-3.415	-2.4	16.299	-18.559	-2.186	-16.356	35.705	-11.369	1.49	-29.574	9.1	10.925	30.578	10.209	17.015	-27.053	17.017	20.789	30.41	-17.366	23.233	-20.475	11.375	-5.617	4.656	-20.027	15.046	-9.809	2.677	-13.8502	27.2499	2.7755	0.67795	-15.0173	44.2328	-16.2298	29.3816	-18.7665
51	0.511875	4.88215	-1.612	4.836	-9.122	4.749	5.569	15.149	-8.451	-6.127	-13.452	-2.437	-3.3	16.396	-20.315	-3.053	-15.947	35.629	-12.158	2.998	-29.574	11.375	8.069	26.48	9.538	18.432	-27.997	18.04	20.883	31.759	-15.133	22.566	-20.475	11.375	-4.607	5.139	-22.633	12.093	-11.278	2.915	-14.2256	26.7608	2.40695	-0.0091	-15.5246	46.0574	-16.198	28.8925	-19.2943
52	4.15643	4.73883	-1.612	4.836	-11.452	4.895	4.597	15.863	-8.648	-5.998	-14.479	-2.154	-3.242	17.324	-20.59	-2.242	-14.312	38.265	-12.505	3.381	-31.849	11.375	12.584	32.221	9.135	18.634	-28.746	19.177	20.808	31.789	-15.32	23.266	-20.475	11.375	-3.725	5.007	-21.736	14.003	-9.318	1.727	-14.5259	27.6208	2.9848	0.616525	-14.3871	44.747	-14.56	28.8879	-17.8087
53	2.7391	6.6066	-1.612	6.448	-11.206	3.154	4.3	16.818	-9.228	-5.068	-14.114	-2.169	-1.26	18.38	-22.232	-2.144	-19.174	36.63	-12.731	1.65	-31.849	13.65	12.251	31.668	11.255	18.62	-29.742	19.908	20.059	31.43	-14.973	23.045	-20.475	11.375	-2.944	4.141	-22.691	12.85	-9.834	3.043	-14.1369	29.4772	2.99618	0.279825	-17.7382	46.269	-12.5603	32.057	-17.3037
54	1.7654	5.22795	-3.224	8.06	-15.022	6.584	3.162	18.036	-9.179	-4.515	-14.881	-1.49	-2.552	17.856	-22.519	-2.248	-13.874	40.213	-13.826	2.315	-31.849	13.65	14.148	30.123	12.527	18.291	-29.733	20.989	20.49	32.326	-14.668	22.653	-20.475	11.375	-2.215	5.28	-22.728	12.698	-9.593	2.881	-13.8775	28.2236	2.88925	1.70853	-14.4144	46.0483	-23.2983	8.49712	-17.6017
55	1.7927	6.86367	-1.612	4.836	-15.454	7.346	2.791	18.505	-8.864	-4.443	-13.855	-1.255	0.538	18.551	-20.589	-2.534	-14.201	39.86	-13.031	1.784	-34.124	13.65	16.034	32.921	13.097	18.009	-30.111	21.436	20.953	31.937	-15.69	23.846	-20.475	11.375	-0.211	5.681	-23.187	13.945	-9.255	3.268	-13.8593	26.1852	3.64228	1.06697	-16.1684	47.7409	-15.0787	32.2163	-16.7941
56	2.29093	5.642	-1.612	6.448	-16.703	8.454	2.896	18.117	-8.781	-5.041	-13.496	-1.21	0.45	19.69	-22.884	-2.086	-18.599	39.464	-12.482	2.734	-34.124	13.65	14.299	33.268	11.682	18.144	-30.728	22.785	22.773	32.249	-14.388	23.336	-20.475	11.375	-0.02	5.212	-22.28	16.175	-10.189	2.706	-14.2369	29.7001	3.10993	0.9009	-19.0986	48.1981	-16.1024	33.8224	-17.538
57	2.1203	6.70443	-3.224	6.448	-18.712	10.741	2.704	18.471	-9.186	-3.298	-13.162	0.394	-0.249	19.537	-21.871	-2.006	-18.117	39.718	-13.129	0.976	-34.124	13.65	15.166	36.229	11.499	17.047	-31.022	21.989	25.651	30.817	-13.009	22.073	-20.475	11.375	1.898	4.423	-22.538	13.82	-10.379	3.743	-16.3914	25.7211	3.0485	1.3286	-14.8421	49.2447	-14.9581	34.5527	-17.5402
58	2.75048	6.24715	-3.224	6.448	-17.506	11	4.027	18.005	-10.525	-2.066	-13.364	-0.112	2.039	18.539	-23.592	-0.529	-17.645	40.218	-12.755	0.776	-36.399	13.65	14.193	34.884	11.766	17.052	-31.86	22.375	25.111	33.1	-13.236	22.967	-20.475	11.375	3.206	7.481	-22.734	15.325	-9.967	4.118	-14.4144	26.0488	3.36018	2.10893	-19.3011	47.4474	-18.3024	33.2105	-17.538
59	1.46283	7.61443	-3.224	6.448	-19.297	12.312	2.623	18.249	-15.119	-0.701	-13.626	1.96	1.387	20.645	-24.996	-1.505	-18.66	40.897	-13.491	1.883	-36.399	13.65	14.783	36.039	11.448	17.514	-31.749	22.092	26.213	31.816	-12.631	22.925	-20.475	13.65	4.292	9.705	-22.331	16.565	-8.447	2.388	-14.0299	22.5111	3.00983	1.98835	-19.0554	50.2297	-14.3052	34.7825	-18.5049
60	1.03513	6.6976	-3.224	6.448	-21.736	13.97	1.63	17.547	-15.529	-1.283	-14.514	2.045	1.78	16.914	-26.684	-1.7	-15.975	42.08	-14.113	1.73	-36.399	15.925	13.189	40.066	10.724	19.317	-31.535	22.213	26.783	32.254	-13.506	24.877	-20.475	13.65	4.063	9.292	-22.476	16.465	-8.475	1.828	-11.8414	23.2619	3.731	1.84502	-19.0349	49.4335	-15.9023	36.1452	-22.1699
61	4.09045	8.9726	-4.836	6.448	-22.075	15.558	1.676	18.06	-16.145	-0.607	-15.103	1.901	1.817	20.962	-27.15	-0.556	-12.405	42.042	-14.114	-1.218	-36.399	15.925	15.268	42.891	8.798	18.184	-31.22	21.466	27.785	32.403	-12.109	23.119	-20.475	11.375	5.254	9.562	-22.641	16.554	-6.278	1.861	-11.9028	24.0331	3.58995	2.639	-17.0852	49.8339	-12.9311	36.5001	-22.0106
62	-0.0637	7.1981	-3.224	6.448	-24.279	16.897	0.462	18.227	-17.201	0.151	-15.463	1.195	1.647	22.507	-28.336	-0.78	-11.865	40.978	-14.296	0.127	-36.399	15.925	14.691	42.733	7.141	19.946	-31.242	22.015	28.935	34.64	-12.948	23.898	-18.2	11.375	5.363	9.235	-21.913	16.998	-6.579	3.186	-11.4751	22.6635	3.73783	2.44107	-15.1219	50.2047	-16.3482	38.0835	-22.1153
63	3.59222	8.54945	-4.836	8.06	-25.986	17.907	-0.863	17.388	-17.866	0.447	-15.214	1.005	0.477	22.851	-27.413	-1.283	-14.71	42.983	-14.772	-0.115	-38.674	13.65	14.475	40.318	6.661	20.434	-30.691	22.366	28.668	36.832	-15.095	24.315	-20.475	11.375	5.574	10.225	-22.426	17.847	-7.334	6.179	-11.2248	23.6122	2.70953	2.9757	-17.4834	51.3354	-14.9649	39.5509	-24.3925
64	2.8574	8.34925	-4.836	8.06	-26.505	19.321	-0.829	16.45	-15.436	0.358	-14.973	1.469	2.011	23.479	-26.736	-2.318	-13.009	42.667	-13.868	-0.734	-38.674	15.925	11.353	40.826	5.294	21.082	-30.846	22.312	29.785	39.527	-13.711	25.89	-18.2	11.375	5.829	10.752	-21.387	17.67	-8.106	7.083	-8.34698	22.7727	3.34198	3.19638	-18.6231	52.6435	-14.6715	40.3835	-22.2358
65	6.21758	12.0802	-4.836	9.672	-27.607	20.697	-1.222	17.634	-15.061	0.306	-15.395	1.814	0.007	23.103	-27.203	-0.734	-11.064	42.142	-13.802	-0.617	-38.674	18.2	14.955	46.222	3.85	21.444	-30.846	22.584	27.529	39.569	-11.506	26.984	-18.2	9.1	7.989	10.799	-20.437	18.523	-7.159	6.98	-10.4536	21.5602	4.3498	2.69132	-15.6543	52.0793	-13.3679	40.379	-24.9135
66	2.5935	7.2618	-4.836	9.672	-27.079	20.554	-0.782	17.813	-15.126	-0.125	-15.22	3.761	3.683	23.943	-28.746	-1.768	-6.798	41.427	-15.58	-0.766	-38.674	15.925	16.403	43.603	1.924	21.488	-31.239	22.291	28.618	40.054	-10.563	25.963	-18.2	9.1	7.767	9.508	-21.587	17.483	-7.445	8.989	-9.50495	23.2641	3.77195	2.09073	-16.2207	51.8381	-15.7748	42.3468	-23.2755
67	5.22113	7.41422	-4.836	11.284	-26.833	20.361	-0.701	18.335	-16.626	-0.432	-15.263	3.047	0.939	22.792	-28.319	-2.652	-6.583	42.5	-15.44	-1.288	-38.674	18.2	13.715	43.515	0.939	20.964	-31.491	22.165	30.25	40.709	-10.207	26.242	-15.925	9.1	6.87	12.896	-20.737	18.895	-8.419	8.16	-11.0042	24.8316	4.01538	3.3579	-15.4063	52.4751	-15.1424	44.0895	-24.388
68	7.90335	11.441	-4.836	9.672	-28.235	21.902	-1.47	18.394	-17.502	0.122	-14.712	2.593	2.858	25.201	-28.15	-1.618	-6.27	42.38	-15.147	-1.379	-40.949	15.925	15.862	40.32	0.807	20.875	-31.93	22.453	29.138	44.457	-10.274	25.946	-15.925	9.1	5.747	14.144	-20.303	20.695	-6.08	5.465	-11.648	25.5187	4.32023	2.98708	-14.4963	52.5298	-15.5155	45.6752	-24.3721
69	7.70997	9.69605	-4.836	9.672	-28.826	23.001	-1.323	18.932	-17.432	1.458	-14.146	2.226	0.819	23.102	-28.033	-3.234	-7.465	41.606	-15.44	-1.83	-40.949	18.2	14.927	43.447	0.945	20.751	-33.326	22.394	27.693	45.802	-10.014	26.068	-15.925	11.375	5.876	14.54	-19.815	20.347	-7.05	8.789	-11.5183	26.2922	4.76613	3.61498	-15.9455	53.7173	-15.8681	44.6673	-24.322
70	9.84165	11.5365	-4.836	11.284	-29.489	23.229	-1.33	18.38	-16.109	2.095	-12.876	1.7	2.123	24.156	-29.617	-3.013	-2.315	41.304	-17.444	-1.111	-43.224	15.925	17.164	44.996	-1.916	21.832	-33.778	23.414	21.289	49.285	-7.845	27.412	-15.925	11.375	5.318	17.987	-20.006	22.039	-6.246	7.059	-11.9051	26.7745	4.09045	3.64227	-15.3471	52.4319	-16.9033	48.5166	-25.6597
71	8.10127	10.4172	-4.836	11.284	-30.694	23.549	-1.991	17.489	-15.181	2.194	-11.09	2.301	3.346	25.431	-28.763	-3.354	-1.87	40.54	-17.877	-0.558	-43.224	18.2	17.55	46.25	-1.645	22.527	-34.018	23.489	22.066	50.349	-8.968	27.617	-15.925	11.375	3.857	15.569	-21.059	22.193	-7.137	9.223	-11.7868	26.9087	4.9413	2.73683	-13.0107	54.211	-16.7213	47.5452	-22.8
72	6.24943	7.7441	-4.836	11.284	-31.342	23.764	-1.763	16.313	-13.785	3.097	-9.344	2.266	4.43	24.875	-27.799	-3.305	-0.281	40.471	-17.907	-1.118	-43.224	20.475	18.955	44.486	-2.201	22.022	-34.611	23.786	22.26	53.106	-7.83	28.18	-15.925	11.375	4.08	15.289	-21.021	21.586	-6.613	9.251	-11.7458	28.8356	4.77978	3.3397	-16.537	52.1476	-18.978	49.0376	-23.2596
73	10.0646	11.5069	-4.836	11.284	-31.819	24.119	-1.601	15.358	-12.628	4.59	-9.524	2.528	1.66	22.275	-30.163	-3.378	-0.295	41.561	-17.171	-2.411	-43.224	20.475	17.959	46.532	-1.886	21.115	-34.396	23.831	19.926	53.62	-9.201	28.608	-13.65	11.375	1.385	13.314	-19.63	22.306	-8.109	11.032	-12.7468	29.1132	5.88998	3.5399	-14.1778	54.0654	-15.9318	49.7156	-23.3734
74	13.0358	11.4865	-4.836	12.896	-33.824	24.692	-3.78	14.954	-14.503	5.147	-8.946	1.532	3.862	24.743	-31.612	-1.892	-0.125	41.239	-18.18	-2.466	-47.774	18.2	19.888	50.283	-3.37	21.932	-33.9	24.288	20.308	55.366	-8.251	30.274	-13.65	11.375	2.817	12.569	-19.085	22.047	-5.836	9.294	-12.8401	27.4547	4.94813	3.66502	-15.1174	54.5226	-14.7124	48.9307	-22.5726
75	11.7754	11.4569	-6.448	12.896	-33.716	25.136	-3.692	14.485	-13.541	5.246	-7.739	-0.524	3.311	24.765	-33.023	-0.996	2.139	40.239	-17.915	-4.035	-45.499	20.475	20.631	46.03	-2.361	24.228	-33.527	25.264	18.872	57.951	-6.39	28.951	-13.65	13.65	1.423	11.929	-18.748	23.2	-6.51	10.021	-11.7549	27.5298	4.94358	3.25553	-14.8694	55.2507	-15.42	50.8349	-22.618
76	15.8454	15.8044	-6.448	14.508	-33.921	24.901	-5.009	13.323	-14.314	5.426	-7.217	0.002	3.466	26.936	-31.436	-1.172	2.538	40.851	-18.689	-3.582	-47.774	20.475	24.651	46.556	-2.764	23.996	-33.573	25.704	19.168	58.897	-7.075	29.994	-13.65	11.375	2.007	12.331	-19.548	23.019	-6.519	9.753	-12.2372	27.5298	6.20848	2.61397	-18.1727	54.261	-16.6667	50.6005	-20.111
77	15.5451	14.2233	-6.448	14.508	-34.279	25.231	-5.958	13.477	-14.626	5.316	-6.668	-2.523	2.752	26.543	-33.757	-1.83	0.777	40.518	-18.429	-3.739	-47.774	20.475	21.303	51.467	-2.678	25.792	-33.086	26.202	17.461	59.203	-6.873	30.4	-13.65	11.375	5.098	11.67	-19.762	22.755	-6.746	10.184	-13.5931	25.5733	6.30175	2.17945	-15.6884	55.1119	-14.1733	51.4719	-21.1257
78	14.4645	13.7251	-8.06	14.508	-35.49	25.665	-6.975	13.737	-15.811	5.956	-5.494	-2.503	6.328	24.925	-34.91	-2.059	1.652	42.393	-18.885	-3.37	-50.049	18.2	23.726	51.842	-4.903	26.539	-31.919	26.764	18.517	58.51	-6.951	30.183	-13.65	11.375	1.098	12.71	-19.928	23.344	-6.456	9.312	-12.9084	27.871	5.86723	3.67412	-14.0254	55.5009	-13.6295	50.4163	-19.0599
79	17.8519	14.5532	-8.06	16.12	-35.633	25.98	-6.873	13.352	-16.301	5.724	-3.633	-1.74	3.923	25.252	-35.982	-2.645	0.837	41.528	-18.236	-2.078	-52.324	18.2	26.42	52.052	-6.032	25.43	-31.375	27.707	17.62	59.321	-7.106	31.056	-13.65	11.375	1.496	14.802	-20.22	23.375	-7.227	10.26	-11.4091	26.3763	6.52698	3.39202	-16.2185	55.303	-13.1631	52.4797	-19.5968
80	14.7602	13.4634	-8.06	16.12	-35.623	25.107	-5.973	12.85	-16.084	5.62	-10.115	-1.949	1.468	28.506	-36.956	-3.507	1.344	42.752	-19.269	-2.969	-50.049	22.75	23.485	50.901	-6.452	27.649	-31.422	28.223	18.631	61.48	-5.315	32.41	-13.65	13.65	2.09	16.997	-18.988	24.743	-9.061	10.256	-14.7738	25.414	6.79087	4.21102	-12.533	53.8675	-10.9063	51.9587	-20.5523
81	14.1073	14.2347	-8.06	16.12	-36.245	25.898	-5.862	13.002	-16.996	6.795	-10.959	-2.851	1.531	26.701	-37.815	-3.467	0.449	42.979	-19.565	-2.432	-50.049	25.025	29.671	51.064	-7.253	27.503	-31.226	27.82	18.398	61.502	-5.367	34.049	-11.375	13.65	0.356	17.041	-20.967	25.352	-8.546	9.949	-12.3692	25.5619	6.73173	3.91982	-12.6717	54.8685	-8.94302	50.7348	-20.2589
82	11.4251	11.8982	-8.06	16.12	-35.913	25.853	-5.178	12.792	-17.577	8.196	-12.917	-3.149	1.531	26.316	-39.425	-3.421	0.566	41.89	-20.888	-1.955	-54.598	15.925	27.762	48.246	-6.185	26.221	-31.384	27.516	17.755	64.9	-6.515	33.317	-11.375	13.65	1.976	17.089	-21.04	25.081	-9.913	11.668	-14.1619	26.4264	6.7249	3.276	-13.6022	54.2292	-11.102	52.4251	-20.2976
83	13.2337	11.2976	-8.06	17.732	-35.795	26.182	-6.097	12.464	-19.989	7.888	-15.403	-3.263	0.847	29.814	-39.438	-2.888	3.403	41.262	-20.732	-1.4	-54.598	20.475	26.045	52.601	-8.381	28.326	-31.392	29.051	18.042	68.365	-8.116	34.004	-13.65	11.375	2.139	17.835	-20.781	26.167	-9.146	11.346	-15.0059	25.3253	7.64628	3.65137	-14.039	56.1334	-12.0052	52.3841	-18.8188
84	13.8184	10.5787	-9.672	17.732	-35.367	26.344	-5.554	12.117	-20.299	7.584	-15.925	-3.932	1.489	28.37	-38.315	-2.615	1.824	39.627	-19.233	-0.069	-50.049	29.575	27.763	60.713	-9.556	28.92	-32.737	29.246	17.287	70.572	-7.996	33.877	-13.65	13.65	-1.419	16.101	-20.08	26.662	-8.056	10.935	-15.1924	25.5096	7.007	4.55455	-12.8037	56.1106	-9.65738	53.2123	-19.2511
85	12.3988	10.8199	-9.672	17.732	-34.623	26.784	-5.49	11.667	-17.58	9.97	-17.444	-4.755	3.045	28.39	-38.556	-3.029	2.244	39.412	-20.138	-1.375	-52.324	25.025	24.442	58.903	-10.096	28.235	-33.324	29.076	17.599	71.75	-6.149	36.31	-13.65	11.375	-1.061	15.117	-20.569	25.382	-8.503	11.559	-15.8021	26.39	7.75775	4.58185	-15.1583	55.1801	-9.88715	52.3	-17.7086
86	13.7911	11.855	-8.06	17.732	-33.518	27.639	-5.581	11.858	-14.352	11.873	-17.254	-4.966	6.087	27.264	-38.613	-2.321	6.247	41.062	-20.004	0.264	-50.049	29.575	25.108	63.591	-11.607	28.717	-34.868	29.289	16.855	71.51	-5.973	36.267	-11.375	11.375	-5.706	13.503	-20.948	26.086	-8.519	12.02	-16.1434	25.8394	6.26308	3.84475	-13.8024	55.0823	-8.27873	53.3215	-20.0701
87	12.1917	11.8254	-8.06	20.956	-32.909	28.59	-5.584	11.782	-15.087	11.126	-18.39	-5.373	3.097	29.16	-38.182	-1.924	4.675	39.624	-19.505	-0.446	-56.873	22.75	24.275	70.316	-12.729	29.579	-35.403	29.686	17.409	72.107	-5.673	37.852	-11.375	11.375	-4.465	16.303	-20.152	26.675	-7.968	11.251	-16.4141	24.3994	6.70443	3.822	-15.1492	55.7193	-10.9905	53.6718	-20.3703
88	14.4713	11.8892	-6.448	19.344	-32.27	29.962	-6.324	11.556	-15.948	11.668	-19.654	-5.158	5.054	30.794	-39.479	-2.327	5.539	40.81	-18.633	1.107	-59.148	22.75	25.102	65.798	-11.106	28.587	-35.71	29.217	16.285	73.977	-4.153	38.614	-11.375	9.1	-2.979	16.977	-20.666	28.235	-8.64	12.664	-15.9614	25.7462	7.25725	3.97215	-14.6829	55.2006	-8.7724	53.7924	-20.2361
89	16.2048	11.2385	-4.836	20.956	-32.541	30.007	-6.656	11.385	-13.237	13.022	-21.55	-4.758	5.112	31.974	-41.651	-1.554	8.43	39.315	-16.984	2.06	-54.598	29.575	23.266	68.019	-11.013	29.318	-35.98	29.414	16.17	75.659	-5.134	38.938	-11.375	11.375	-1.352	19.603	-20.353	28.497	-8.728	14.261	-16.1889	24.4744	7.8897	3.7219	-16.6553	56.0583	-8.9089	54.7297	-19.5377
90	14.5509	11.5138	-4.836	20.956	-32.097	28.562	-7.252	11.53	-15.519	14.123	-21.343	-3.646	4.719	32.87	-40.151	-1.945	10.076	39.405	-16.287	1.178	-59.148	20.475	25.284	65.999	-11.491	29.55	-37.124	28.314	15.456	76.471	-5.41	38.827	-11.375	11.375	-3.788	19.841	-20.472	28.574	-7.002	13.159	-15.7407	26.87	7.65765	3.97443	-15.6952	55.3075	-8.41522	53.624	-21.5442
91	16.3709	9.43898	-4.836	20.956	-27.851	28.052	-6.928	12.212	-12.631	16.762	-22.182	-4.493	6.073	32.246	-40.08	-0.893	10.475	39.65	-16.452	2.743	-59.148	22.75	28.461	66.442	-11.279	29.866	-37.357	28.294	15.438	78.419	-3.918	39.797	-11.375	13.65	-1.467	19.807	-19.63	28.567	-6.73	13.577	-16.0274	27.0043	8.53808	3.8129	-15.627	55.8444	-9.0363	53.7742	-22.2268
92	15.0173	13.5795	-4.836	20.956	-26.484	25.686	-6.903	12.156	-10.425	16.228	-22.164	-3.907	6.176	35.797	-40.803	-2.244	8.495	37.346	-16.525	2.169	-59.148	25.025	24.19	68.433	-11.35	31.399	-38.228	28.595	13.915	80.717	-7.4	38.208	-11.375	11.375	-0.96	19.236	-20.341	29.248	-8.458	14.9	-17.3537	26.1784	8.3174	5.18473	-14.8034	53.7901	-7.28	53.9744	-21.7945
93	15.1196	10.5082	-4.836	20.956	-27.557	23.647	-7.084	11.53	-11.261	16.439	-22.316	-3.996	7.425	36.782	-42.652	-0.23	9.924	36.994	-17.644	2.906	-56.873	31.85	26.146	68.642	-13.289	32.305	-38.605	28.779	15.597	78.566	-3.723	39.935	-11.375	13.65	-1.899	19.917	-19.71	29.184	-7.075	14.372	-17.7678	29.1655	8.87933	5.09828	-14.9467	56.6885	-7.70087	54.6273	-21.5101
94	14.1573	11.7162	-3.224	22.568	-29.752	22.97	-8.078	11.28	-9.958	16.535	-21.984	-3.749	7.842	40.34	-41.838	-0.08	8.955	36.265	-16.888	3.281	-59.148	31.85	26.658	69.921	-13.673	32.516	-38.679	28.175	16.482	76.553	-4.184	40.628	-11.375	13.65	-4.195	19.401	-19.395	30.251	-7.025	15.263	-17.745	26.8678	7.82828	5.92865	-13.8092	56.6202	-6.4883	53.9812	-23.8898
95	15.4927	15.3289	-3.224	22.568	-27.761	22.656	-9.032	11.916	-3.137	11.557	-23.798	-4.028	10.074	39.814	-41.649	3.102	9.105	36.164	-17.55	4.479	-61.423	31.85	24.223	67.372	-14.871	31.975	-38.405	27.804	16.754	76.735	-5.986	39.675	-9.1	13.65	-6.244	19.765	-18.853	31.102	-8.82	14.602	-19.0031	27.0429	8.81563	5.64427	-13.7774	56.0674	-2.85285	53.1986	-24.7133
96	9.82573	12.1098	-3.224	22.568	-26.356	22.305	-8.189	11.877	-3.21	12.381	-25.784	-4.218	8.49	40.045	-41.25	5.031	10.847	37.021	-17.074	4.359	-61.423	31.85	21.727	71.407	-14.511	32.972	-38.825	28.279	16.766	77.16	-3.08	42.038	-6.825	15.925	-6.942	21.682	-19.19	30.447	-8.568	15.122	-18.134	26.8632	8.88615	4.5682	-13.3565	56.2426	-4.9413	55.3621	-24.4176
97	13.5499	12.144	-3.224	24.18	-27.147	21.838	-9.383	12.368	-3.678	11.161	-25.805	-4.792	11.441	41.717	-42.63	5.314	9.812	37.128	-17.439	4.826	-63.698	31.85	23.194	68.922	-16.304	32.584	-39.158	28.715	15.979	75.802	-2.919	42.579	-6.825	15.925	-9.955	22.676	-18.596	31.958	-8.949	16.882	-21.0711	28.2714	9.40712	5.14605	-14.3894	55.121	-5.50095	55.6852	-25.6711
98	11.4091	9.6005	-3.224	24.18	-26.433	18.947	-9.162	12.371	-4.307	12.576	-26.073	-4.16	13.739	43.389	-43.366	6.097	12.75	38.355	-16.446	4.318	-65.973	29.575	20.375	69.588	-15.84	31.315	-39.173	28.166	14.043	74.934	-3.168	43.116	-6.825	18.2	-13.417	22.017	-20.456	32.308	-8.448	16.93	-19.565	26.8928	9.63462	6.49968	-14.2051	55.6852	-3.48985	56.3017	-24.9454
99	17.9361	12.6831	-1.612	24.18	-26.341	15.957	-8.851	11.973	-3.268	12.159	-24.845	-4.806	16.278	42.783	-42.841	5.668	9.103	34.637	-17.596	4.471	-65.973	31.85	19.528	71.679	-18.021	31.82	-39.338	28.764	14.214	74.453	-2.587	42.912	-9.1	18.2	-13.959	23.669	-20.041	32.555	-8.741	15.584	-20.9277	26.0851	10.9746	6.71807	-14.883	54.3907	-4.2679	57.3027	-25.4459
100	13.9139	12.4079	-1.612	25.792	-24.719	13.144	-8.713	12.277	-3.671	13.018	-26.857	-5.038	15.353	43.508	-45.073	5.247	10.11	35.538	-16.885	4.241	-68.248	31.85	17.337	74.092	-18.96	31.583	-39.929	28.697	13.936	73.677	-1.957	41.949	-6.825	18.2	-13.939	21.527	-19.146	33.031	-7.14	16.135	-20.1838	26.8996	12.1872	7.4711	-15.0901	55.2484	-4.3498	57.082	-25.2593
101	14.8239	15.2948	-1.612	24.18	-24.2	11.257	-8.286	12.402	-4.966	14.052	-27.96	-4.882	18.203	44.621	-45.258	4.008	14.059	38.586	-14.775	7.017	-68.248	34.125	15.548	74.689	-20.89	30.739	-40.275	29.056	13.822	73.36	-3.211	42.817	-4.55	18.2	-12.705	22.98	-21.165	32.63	-8.302	15.084	-22.1562	26.9337	11.8209	8.58812	-14.6055	55.2029	-1.7745	58.579	-23.5053
102	15.1242	12.4147	-1.612	24.18	-23.395	10.127	-9.175	12.321	-5.973	14.442	-26.997	-4.829	21.382	46.523	-45.447	2.441	12.006	36.101	-13.37	5.599	-68.248	31.85	14.667	74.446	-20.2	32.55	-40.095	29.389	15.345	72.015	-3.283	42.43	-6.825	18.2	-10.454	24.626	-20.996	34.113	-9.662	15.849	-19.7334	26.0169	11.6958	7.60533	-15.2652	55.3485	-3.67413	59.7392	-25.2639
103	16.6712	14.5236	-1.612	25.792	-22.372	10.053	-9.215	12.631	-6.284	15.797	-27.887	-4.623	20.723	45.908	-45.604	3.192	10.147	35.308	-13.513	6.326	-68.248	34.125	16.287	75.329	-20.226	33.438	-39.951	29.123	14.844	71.497	-1.155	43.242	-4.55	20.475	-9.272	28.093	-20.911	32.933	-9.916	16.687	-21.0756	26.2353	12.3988	6.9706	-14.9695	55.9559	-2.73	59.3752	-23.8488
104	15.966	14.4895	-1.612	24.18	-20.355	8.338	-8.702	12.442	-4.229	14.9	-26.725	-3.974	20.562	48.026	-47.031	3.592	11.486	36.034	-13.837	6.821	-68.248	34.125	14.62	74.59	-21.913	35.473	-39.817	29.032	15.691	69.849	-2.969	43.113	-4.55	20.475	-5.456	34.361	-20.389	33.464	-9.879	17.888	-18.7574	25.4686	12.6513	6.81135	-17.1649	56.1857	-1.15115	60.6379	-24.5177
105	18.7164	8.8907	-1.612	24.18	-19.686	6.177	-7.905	13.171	-5.66	17.479	-27.487	-4.482	20.86	48.748	-46.526	3.041	10.42	36.1	-14.124	6.061	-68.248	31.85	14.356	71.384	-20.463	35.519	-39.74	28.334	14.951	69.218	-1.399	43.557	-4.55	20.475	-5.189	34.528	-20.94	34.869	-10.036	18.343	-21.7422	26.3126	13.4362	6.3791	-16.6075	56.1152	-2.11802	61.2271	-25.1751
106	14.6123	11.7049	-1.612	25.792	-20.475	5.261	-7.898	13.09	-4.642	17.272	-29.49	-4.845	23.072	49.756	-49.083	2.42	11.489	36.101	-13.722	5.905	-70.523	27.3	14.361	72.007	-21.82	35.375	-39.436	28.907	15.27	69.652	-0.496	43.947	-2.275	22.75	-4.912	39.222	-21.519	33.781	-8.717	16.863	-19.9859	26.1898	13.923	5.03002	-16.5916	56.4427	-3.31012	62.4715	-22.386
107	12.9197	12.9902	0	24.18	-18.83	6.135	-7.946	14.845	-2.728	16.103	-29.664	-4.717	19.231	54.132	-49.851	3.619	11.434	37.727	-13.732	7.926	-70.523	29.575	13.51	71.97	-22.291	35.33	-39.028	29.844	16.077	67.978	-0.107	45.279	-4.55	22.75	-3.179	41.366	-22.453	34.194	-9.697	18.982	-20.1974	26.1193	12.1258	6.08562	-15.9614	55.2188	-0.9919	63.6135	-23.6236
108	18.8143	8.18545	1.612	25.792	-19.299	6.593	-7.675	15.817	-2.878	16.112	-30.868	-5.504	22.5	54.507	-48.832	5.951	9.09	36.778	-14.344	9.958	-72.798	29.575	14.289	71.369	-24.205	35.273	-39.209	30.264	16.122	66.864	1.521	44.268	-2.275	22.75	-3.41	45.45	-23.159	35.105	-7.842	19.185	-20.3521	27.5138	11.0656	5.71025	-16.1912	56.1083	-2.57758	63.2177	-22.9912
109	15.6793	12.8356	1.612	24.18	-17.575	5.115	-7.1	16.494	-0.325	14.737	-33.247	-5.639	23.207	53.791	-48.893	6.563	10.185	35.454	-13.438	10.275	-72.798	29.575	12.095	69.672	-24.109	38.717	-39.419	30.962	17.453	67.487	0.72	44.792	-4.55	22.75	-2.709	47.82	-23.565	35.014	-7.208	20.7	-18.9325	25.819	10.9723	4.78205	-16.3277	54.782	-3.17135	63.5066	-23.4166
110	15.8203	10.192	3.224	25.792	-17.581	5.299	-7.771	16.969	-1.419	14.277	-32.924	-6.041	24.667	56.22	-50.627	4.88	11.576	36.909	-14.24	10.714	-70.523	29.575	9.941	70.665	-24.965	37.521	-39.263	31.257	15.722	66.606	0.353	45.183	-4.55	22.75	0.236	53.537	-23.841	35.903	-7.243	20.901	-18.1181	25.8849	10.5424	5.5783	-16.976	56.3995	-1.64482	65.0605	-23.6509
111	15.015	12.0325	3.224	25.792	-16.011	5.18	-7.05	18.345	0.506	14.07	-35.253	-5.511	24.007	58.91	-47.512	5.878	9.769	35.737	-14.296	10.17	-68.248	27.3	10.508	69.304	-24.748	37.305	-39.15	31.44	16.789	63.594	1.659	44.043	-2.275	25.025	1.635	53.527	-24.466	35.077	-5.95	20.799	-18.2819	27.2977	10.5287	5.36218	-17.0534	57.4938	-1.4469	63.5817	-23.7214
112	17.8929	9.5095	3.224	25.792	-14.19	5.736	-5.702	19.168	3.146	12.781	-36.145	-5.835	21.739	58.673	-49.933	6.133	8.299	33.868	-12.455	9.614	-70.523	29.575	8.583	69.14	-25.46	39.288	-39.185	32.197	15.963	64.219	-1.175	45.002	-4.55	25.025	0.517	52.371	-23.798	34.468	-6.012	22.004	-20.93	25.8053	9.9736	5.20975	-17.3173	57.2868	-2.36827	63.4452	-23.3392
113	18.9803	7.93065	3.224	29.016	-13.687	4.275	-5.625	19.447	2.864	11.859	-35.914	-5.467	26.442	58.821	-49.872	6.886	8.165	33.92	-14.785	10.248	-65.973	27.3	9.679	70.909	-25.937	38.829	-38.975	32.606	15.395	65.752	0.458	44.492	-4.55	22.75	2.93	53.878	-25.038	36.077	-4.776	22.251	-18.4958	25.0591	9.31385	5.84675	-15.1174	57.6804	-0.948675	65.2857	-24.5791
114	15.7612	10.8586	4.836	29.016	-13.939	4.374	-5.864	20.255	3.257	11.261	-34.925	-5.284	23.853	60.783	-51.418	7.414	9.339	36.891	-14.894	11.73	-65.973	27.3	9.36	74.37	-26.353	39.516	-39.647	32.535	15.538	66.816	0.898	44.523	-2.275	25.025	2.506	53.981	-22.783	34.683	-4.283	22.623	-19.1328	25.4231	10.3513	6.6066	-15.8476	56.8432	-1.22167	65.9181	-24.2652
115	15.8226	9.23422	3.224	25.792	-13.945	6.04	-4.434	21.704	3.317	12.225	-33.845	-4.487	21.249	67.697	-49.046	11.499	8.197	34.42	-15.966	11.066	-65.973	27.3	5.485	74.619	-28.139	37.489	-39.817	32.303	16.276	66.444	-0.267	43.975	-4.55	22.75	0.3	53.675	-23.298	34.299	-4.591	23.147	-18.7164	24.0581	10.2603	6.1334	-15.7157	56.4086	-2.87788	66.1274	-22.4452
116	16.7622	10.9063	4.836	27.404	-15.514	6.63	-3.375	22.284	4.2	11.844	-37.129	-4.449	22.831	68.871	-49.721	12.675	10.537	38.379	-16.154	12.728	-65.973	27.3	3.946	74.463	-29.612	37.423	-40.866	33.349	17.475	68.876	-0.353	46.123	-2.275	25.025	2.988	58.149	-23.366	36.326	-4.927	24.086	-16.4755	22.5634	10.1101	5.3872	-15.2948	56.4814	-3.25552	67.9178	-23.1572
117	18.7619	8.63362	3.224	27.404	-18.702	8.547	-3.442	23.276	3.536	12.705	-33.263	-3.154	23.088	69.432	-50.299	11.477	10.347	37.738	-16.691	9.752	-65.973	27.3	6.364	78.769	-29.822	34.535	-41.069	32.469	17.25	68.811	0.804	44.982	-4.55	22.75	0.138	58.104	-21.143	35.669	-4.318	23.76	-16.2435	24.4767	8.85658	6.21757	-15.2379	57.8146	-3.21912	68.2568	-22.9161
118	14.2665	8.48803	3.224	29.016	-18.909	8.529	-1.133	24.033	5.654	12.774	-32.245	-1.964	22.578	71.892	-47.47	13.121	12.289	39.269	-16.914	12.038	-68.248	27.3	8.103	80.688	-30.466	35.915	-40.784	33.526	16.177	68.903	0.581	45.442	-4.55	22.75	0.579	57.61	-18.732	36.375	-3.871	23.081	-18.1704	23.569	9.52088	4.6865	-14.2461	57.3118	-1.88142	69.8607	-24.454
119	14.1437	9.76657	3.224	30.628	-17.08	7.161	-0.447	24.976	7.615	13.559	-30.621	-3.079	22.314	71.317	-46.464	13.307	13.219	38.325	-16.952	12.075	-68.248	27.3	10.222	85.397	-30.773	36.063	-40.161	33.201	16.399	70.177	-0.126	44.903	-4.55	22.75	0.907	60.211	-21.299	36.409	-4.497	24.881	-16.9465	24.1355	9.73245	5.55327	-14.2779	56.1379	-1.75402	70.9026	-23.4916
120	12.6467	10.2739	4.836	30.628	-17.498	8.953	1.022	26.299	7.748	14.22	-30.954	-2.904	23.783	69.265	-46.26	14.57	11.12	36.906	-16.874	10.916	-68.248	29.575	8.379	89.137	-32.207	34.175	-39.653	34.044	16.016	69.454	-0.043	43.226	-4.55	22.75	2.29	60.041	-17.486	37.385	-3.832	24.848	-17.3901	22.3132	10.7653	4.78887	-14.7693	56.097	-2.11348	70.7957	-24.6428
121	12.6672	11.4364	3.224	33.852	-18.051	9.188	2.091	27.652	9.842	13.387	-31.185	-2.857	22.618	70.265	-46.985	12.816	10.948	36.664	-16.188	9.503	-65.973	29.575	9.656	90.41	-32.29	35.064	-39.996	34.625	15.84	68.855	2.802	43.502	-4.55	22.75	3.692	60.161	-15.931	37.997	-3.466	25.59	-17.1535	23.1094	11.4433	6.0606	-15.7362	57.2026	-2.67085	72.1107	-24.6655
122	10.8677	11.2385	3.224	33.852	-16.771	8.659	2.211	29.193	9.558	15.457	-30.624	-2.591	24.413	68.153	-48.33	12.638	10.041	38.096	-17.216	10.709	-68.248	29.575	7.341	90.658	-31.207	34.274	-39.247	35.678	15.847	70.116	0.602	43.605	-4.55	22.75	6.168	61.319	-17.091	38.268	-4.824	25.528	-15.1128	22.8228	12.1167	6.14933	-16.612	56.0992	-2.23633	72.7386	-24.0081
123	15.6429	9.32978	3.224	35.464	-17.761	9.748	1.401	31.305	9.076	16.824	-30.444	-1.888	26.159	66.325	-50.386	13.463	11.623	39.265	-17.447	12.447	-63.698	29.575	9.745	97.014	-31.525	33.969	-39.228	36.454	15.507	70.277	2.701	43.697	-6.825	22.75	5.883	61.822	-18.554	38.637	-2.937	25.68	-16.9624	22.1107	11.6412	6.2062	-16.885	55.5123	-1.1921	72.6089	-23.9216
124	15.8499	11.6935	1.612	35.464	-18.285	10.655	2.029	32.325	10.157	17.05	-28.337	-3.649	25.243	68.295	-50.832	13.964	12.942	38.335	-18.068	11.402	-63.698	29.575	8.884	94.122	-33.268	34.34	-39.094	36.383	15.595	70.763	2.316	44.325	-4.55	22.75	2.704	60.358	-17.143	38.198	-5.248	26.349	-16.81	23.3142	11.9483	6.1334	-17.133	54.5818	-1.8746	73.7646	-23.2096
125	16.9579	10.5037	3.224	37.076	-17.831	11.205	2.022	32.334	7.788	17.906	-27.061	-4.222	22.402	69.537	-51.774	13.137	12.312	39.487	-19.362	11.29	-61.423	31.85	10.664	100.901	-35.453	33.66	-39.368	37.032	16.193	70.967	4.021	44.814	-4.55	25.025	2.344	61.36	-18.676	37.813	-3.217	28.103	-16.4073	22.5862	12.3328	7.96705	-15.8681	55.0823	-0.880425	75.8212	-21.2439
126	12.1531	13.4111	1.612	37.076	-18.934	12.033	1.182	32.699	4.812	18.147	-28.409	-3.87	24.132	66.973	-53.167	11.503	12.4	39.165	-19.14	12.62	-59.148	31.85	9.25	100.665	-35.317	33.161	-39.184	37.229	15.718	72.541	1.995	45.561	-4.55	22.75	1.272	59.021	-17.941	38.6	-3.466	26.447	-15.8977	22.4906	10.6925	7.60305	-18.3388	56.7499	2.2386	75.2433	-21.0324
127	8.63363	15.1947	1.612	35.464	-18.73	12.82	1.864	33.554	5.713	19.593	-28.489	-2.764	23.87	66.411	-53.778	11.489	11.991	39.363	-20.02	13.513	-54.598	29.575	7.554	103.863	-35.234	33.905	-39.456	37.525	15.113	73.425	2.615	45.798	-4.55	25.025	2.745	61.79	-18.926	38.011	-3.325	26.546	-16.3413	22.3314	10.4059	6.82045	-18.3183	55.4076	4.33842	75.8075	-21.3167
128	9.41623	15.9569	1.612	37.076	-20.768	14.124	1.443	34.727	5.737	21.055	-30.116	-0.211	21.838	64.883	-55.967	13.731	13.007	40.188	-20.12	12.893	-52.324	29.575	5.599	105.26	-35.646	32.568	-40.116	37.236	14.975	72.992	2.759	45.485	-4.55	22.75	1.87	61.972	-19.147	37.39	-2.455	26.235	-16.8737	22.2017	11.3227	6.4064	-17.4219	54.8252	3.89025	75.9099	-20.6479
129	1.1557	14.9945	1.612	37.076	-20.33	15.13	2.213	35.285	8.489	19.861	-28.253	0.24	25.965	65.603	-55.882	12.343	13.388	39.998	-21.111	12.217	-52.324	29.575	6.329	108.052	-37.557	32.053	-40.598	37.895	15.255	73.82	4.743	46.595	-4.55	25.025	0.621	61.987	-16.892	37.999	-2.704	27.437	-16.992	22.2358	12.1917	7.27773	-18.1272	55.0027	5.34398	76.4059	-20.2816
130	3.9767	15.5382	0	37.076	-19.468	15.753	1.797	37.077	9.069	20.005	-27.205	1.784	22.787	65.599	-57.568	13.281	13.241	41.411	-20.308	12.761	-47.774	27.3	4.551	107.852	-35.676	32.897	-41.1	38.496	14.595	74.047	4.371	45.781	-6.825	25.025	0.344	61.569	-18.122	38.106	-1.457	27.213	-18.1773	20.02	11.0588	8.6723	-15.7658	53.9312	3.91755	76.8813	-19.3011
131	12.1644	12.0325	0	38.688	-17.731	16.517	1.597	37.515	7.278	22.08	-28.153	2.236	24.208	61.378	-56.977	15.171	14.991	41.47	-20.831	14.038	-47.774	29.575	4.706	107.714	-36.491	33.756	-41.626	39.557	15.791	75.262	3.563	46.396	-6.825	25.025	2.236	62.901	-17.894	38.22	-0.379	29.819	-18.1591	20.8845	11.0952	7.98753	-16.471	53.9539	4.67512	77.1612	-18.5435
132	8.9726	13.6318	-1.612	40.3	-19.245	17.283	0.655	39.329	8.35	22.306	-33.343	9.371	21.193	63.792	-57.663	14.63	12.883	40.282	-22.087	13.059	-45.499	29.575	4.337	106.918	-37.66	31.847	-41.991	40.089	15.573	76.021	4.234	47.82	-9.1	25.025	4.845	65.519	-17.027	37.894	-1.351	30.145	-19.8175	21.5078	12.1622	8.71552	-15.0287	54.3315	5.0505	78.0575	-18.4139
133	6.13568	9.75975	0	38.688	-19.439	18.393	-0.551	40.828	8.532	22.705	-36.452	12.892	23.037	62.084	-60.032	15.772	14.621	42.83	-22.08	10.381	-40.949	27.3	4.877	108.634	-36.77	32.219	-42.714	39.732	15.023	76.809	3.258	46.763	-6.825	27.3	4.117	65.057	-16.505	38.04	-1.003	30.4	-18.0453	20.8458	11.8414	8.20137	-15.8613	54.9617	4.09955	78.1303	-17.7109
134	13.3406	11.5616	-1.612	40.3	-18.148	19.094	-1.563	41.94	7.27	23.869	-37.332	15.343	21.543	61.376	-58.091	16.784	15.696	41.879	-22.724	11.759	-38.674	27.3	10.118	108.863	-35.9	32.492	-42.665	40.304	15.508	79.296	3.733	47.931	-6.825	25.025	3.534	64.097	-17.823	38.866	0.062	31.694	-18.3934	20.2884	10.3171	8.06943	-17.588	52.9779	6.13795	78.3305	-17.6085
135	13.3542	9.12275	-1.612	41.912	-18.078	20.594	-1.374	43.322	8.054	24.316	-34.998	16.915	22.365	62.076	-59.303	18.084	14.788	41.919	-24.775	11.947	-38.674	27.3	12.199	107.95	-36.973	31.952	-43.557	40.851	15.366	80.781	4.633	48.072	-6.825	27.3	2.053	64.81	-18.216	39.404	-1.484	33.224	-19.3648	19.5786	12.2668	7.38693	-16.8646	55.0095	6.188	79.9162	-16.2367
136	9.75975	11.2339	-1.612	43.524	-16.743	20.443	-1.912	44.061	9.283	24.352	-34.351	18.236	20.251	60.716	-60	15.701	16.626	42.763	-25.322	12.162	-36.399	22.75	11.057	110.557	-38.682	31.521	-44.846	41.039	15.038	80.992	4.323	47.951	-6.825	27.3	0.565	62.39	-18.649	39.756	-1.153	32.184	-19.0031	18.1841	12.5512	8.13312	-18.8256	54.8343	7.63945	80.444	-14.8262
137	13.9549	9.1	-1.612	43.524	-17.565	21.802	-2.332	45.305	10.195	25.539	-31.299	20.322	16.095	64.146	-59.629	16.72	15.509	43.798	-24.604	12.54	-36.399	25.025	11.082	111.061	-37.673	31.745	-44.768	40.559	15.81	79.962	4.019	47.833	-9.1	27.3	0.677	64.059	-19.576	39.747	-0.851	33.018	-18.0976	18.771	13.8388	7.71453	-18.4912	54.7866	7.95795	83.0785	-16.8896
138	15.8022	7.22085	0	43.524	-18.676	22.697	-1.939	45.796	11.365	24.315	-29.322	21.816	17.92	63.363	-58.639	19.079	15.158	43.395	-26.659	12.573	-38.674	27.3	10.498	110.058	-38.154	31.657	-45.244	40.617	16.201	81.071	3.322	47.476	-9.1	27.3	0.54	63.355	-18.099	40.461	-0.775	33.145	-17.6927	20.1019	13.9844	8.73373	-17.9611	54.757	5.22567	82.5598	-16.8509
139	14.6419	6.6976	-1.612	45.136	-18.794	24.036	-2.208	47.114	11.538	24.375	-25.999	25.428	17.724	60.839	-55.41	21.776	15.872	43.804	-25.257	11.223	-34.124	22.75	11.08	109.361	-36.827	29.933	-44.851	40.191	16.5	82.204	4.63	47.299	-9.1	29.575	1.233	62.493	-15.619	38.538	0.738	36.065	-15.9045	19.7538	13.4612	8.43343	-19.2738	54.0881	7.1344	82.5711	-16.769
140	14.3371	7.42787	-1.612	43.524	-18.307	23.928	-2.58	47.276	11.258	23.843	-25.16	27.818	18.103	59.317	-52.488	23.94	16.661	43.938	-27.585	13.02	-36.399	25.025	9.292	111.712	-36.519	29	-44.993	40.608	15.568	85.634	5.585	48.228	-9.1	29.575	0.699	62.934	-18.448	40.524	-0.198	37.496	-16.2662	17.8246	13.5567	6.42915	-17.9338	52.7322	6.96377	84.3297	-16.8782
141	14.2347	8.8361	-1.612	46.748	-18.018	23.765	-2.717	47.467	11.186	23.242	-22.9	30.032	14.134	63.777	-52.283	25.673	17.654	42.599	-27.808	12.011	-36.399	25.025	13.193	112.717	-36.145	28.526	-44.444	40.979	14.817	86.445	4.674	49.315	-6.825	29.575	1.035	64.355	-20.089	41.813	-1.04	36.883	-16.6871	17.0352	14.5555	5.55555	-18.0385	54.4726	9.05678	84.4753	-16.1707
142	14.9832	7.43698	-3.224	48.36	-18.246	23.946	-3.429	48.146	11.63	22.632	-19.792	32.34	14.899	62.714	-52.238	25.757	16.508	45.166	-28.358	13.068	-34.124	20.475	12.145	111.55	-35.664	28.273	-44.886	40.913	13.878	88.591	4.46	49.284	-9.1	27.3	0.037	65.221	-18.923	40.633	-1.396	39.101	-16.5779	18.9303	13.7615	6.78177	-19.1055	55.212	7.5985	83.4356	-15.7294
143	16.1343	7.0707	-1.612	48.36	-18.117	24.774	-3.76	49.848	10.869	24.514	-18.137	35.527	16.959	65.565	-51.364	28.134	19.313	44.699	-28.967	14.475	-31.849	20.475	11.854	116.255	-35.869	29.053	-44.709	41.14	13.242	90.858	4.947	49.831	-9.1	29.575	-1.005	65.772	-18.927	41.457	-2.9	39.229	-16.9169	17.5266	15.3244	7.33005	-18.0339	55.667	7.05023	84.4435	-18.0044
144	18.059	4.8321	-1.612	51.584	-17.187	25.59	-3.855	50.654	11.703	24.608	-16.778	37.906	14.369	65.033	-51.978	27.945	18.137	44.882	-30.215	13.123	-29.574	18.2	14.111	118.949	-35.791	26.979	-45.271	41.02	13.547	89.432	4.877	50.067	-9.1	29.575	-3.508	66.236	-19.577	41.124	-4.37	40.688	-18.1659	18.316	12.5489	6.81362	-17.6312	55.5373	8.63135	85.6788	-18.7983
145	15.9682	7.19583	0	53.196	-17.219	25.591	-4.615	51.463	10.991	25.723	-15.045	39.431	15.154	64.173	-52.636	28.961	19.529	45.211	-29.975	13.412	-29.574	22.75	16.156	118.951	-35.132	27.008	-44.751	41.96	13.5	89.837	4.643	50.47	-9.1	29.575	-4.464	66.553	-20.412	41.83	-4.622	41.4	-17.5562	17.2604	11.6935	5.22113	-16.6052	55.5146	9.07498	85.5605	-17.8041
146	15.5269	3.9039	0	53.196	-17.797	27.496	-5.416	52.848	11.187	26.656	-13.831	42.086	15.919	65.838	-53.49	27.527	19.552	45.893	-29.18	14.24	-34.124	25.025	14.829	120.826	-35.459	26.306	-44.388	42.533	14.095	91.465	5.195	49.206	-9.1	31.85	-4.787	67.09	-18.975	42.444	-5.019	41.625	-19.5081	18.3001	10.9655	4.82073	-16.9032	55.2347	8.90207	85.6947	-18.7847
147	15.9364	3.42387	1.612	53.196	-17.436	28.588	-5.957	52.721	11.479	26.462	-14.282	43.22	15.13	62.081	-53.097	28.417	18.697	44.765	-31.478	16.013	-29.574	25.025	15.457	121.137	-35.174	26.381	-44.32	42.91	14.853	90.817	4.445	51.353	-9.1	29.575	-6.287	68.484	-20.26	41.499	-5.907	42.501	-20.0928	17.5835	9.09773	3.9767	-16.2162	56.6611	10.7266	84.928	-19.5127
148	16.8327	5.9332	1.612	54.808	-18.891	29.941	-7.457	53.386	11.14	26.419	-14.368	45.833	13.526	65.059	-52.147	28.19	20.006	45.468	-30.62	15.754	-36.399	34.125	12.994	123.835	-35.155	25.576	-45.694	42.335	15.023	91.566	5.022	50.887	-9.1	29.575	-7.481	69.451	-19.255	42.211	-6.113	41.663	-20.3681	16.8031	11.871	5.67385	-16.0137	56.2903	12.1667	84.7187	-21.2872
149	15.4222	4.49768	0	56.42	-18.637	33.062	-7.456	53.918	11.689	27.822	-14.763	49.009	12.882	64.981	-50.691	27.653	18.511	46.194	-31.703	17.013	-36.279	34.164	14.123	124.982	-37.158	25.123	-45.954	42.988	14.623	93.117	4.518	51.333	-9.1	31.85	-6.797	70.294	-20.351	43.488	-6.565	42.88	-21.1438	17.7746	11.234	6.46783	-17.0079	55.6806	11.7299	84.241	-22.1016
150	18.2819	3.1941	0	56.42	-18.246	33.34	-6.789	54.964	12.562	28.792	-16.822	52.082	14.483	59.816	-51.643	28.464	17.989	48.297	-31.735	16.57	-36.159	34.204	10.471	125.48	-33.698	25.743	-46.29	43.352	13.917	95.284	4.518	50.936	-9.1	31.85	-8.228	72.059	-18.892	42.376	-6.645	44.353	-20.9118	18.1522	11.3636	4.89125	-16.3413	55.1415	10.2648	85.9973	-21.3418
151	19.1601	5.51005	-1.612	58.032	-18.089	35.008	-6.524	56.034	13.256	30.183	-17.74	54.337	14.045	64.57	-53.145	28.621	20.279	46.95	-31.218	18.58	-36.04	34.244	11.867	128.836	-34.461	24.856	-45.863	44.15	13.83	93.512	5.051	52.661	-9.1	34.125	-8.429	75.089	-20.307	44.358	-7.075	43.711	-21.0324	14.9809	11.5957	5.15287	-15.9637	56.1061	11.6867	85.631	-23.2232
152	18.3502	4.1041	-1.612	58.032	-19.449	35.296	-8.238	56.453	12.707	28.971	-16.64	56.2	9.802	64.254	-54.722	28.225	19.816	47.603	-32.34	18.972	-35.92	34.284	10.844	128.546	-31.551	23.655	-46.478	43.148	13.426	93.259	4.217	52.778	-9.1	34.125	-9.657	74.466	-18.485	43.99	-8.523	46.997	-22.163	14.8034	12.533	4.84575	-15.495	55.0322	11.2089	85.8016	-22.7614
153	20.6661	4.99818	-1.612	58.032	-20.12	36.797	-9.821	57.272	12.904	30.157	-16.991	58.631	9.811	58.317	-56.29	31.231	21.824	46.861	-31.414	19.144	-35.8	34.324	9.445	129.989	-32.987	22.727	-46.601	43.169	13.493	92.831	4.548	54.164	-9.1	34.125	-10.52	74.357	-18.819	44.453	-8.272	46.537	-20.4272	15.3585	13.195	4.85712	-13.195	55.0391	12.0848	85.151	-22.9616
154	17.2946	5.3235	-1.612	59.644	-20.63	38.244	-11.225	58.626	12.722	30.253	-18.538	60.445	9.099	60.734	-56.741	28.929	21.088	46.931	-30.752	19.496	-35.68	34.364	10.191	131.208	-32.205	21.717	-46.872	42.958	13.751	93.259	4.993	54.684	-9.1	34.125	-12.269	75.172	-19.367	44.334	-8.024	48.76	-20.2179	15.3358	15.3972	3.93348	-11.6639	56.9455	10.1875	87.4715	-23.867
155	19.2875	6.07653	-1.612	59.644	-20.208	40.181	-12.388	59.223	12.897	32.674	-17.896	62.606	6.395	59.42	-59.417	27.022	19.743	47.25	-31.126	19.619	-35.561	34.404	7.747	130.921	-29.914	21.848	-47.647	42.808	14.212	90.792	4.487	55.251	-9.1	34.125	-12.722	75.34	-18.442	44.926	-8.17	46.866	-19.3671	13.4816	16.1548	5.5965	-11.2954	57.5256	12.6285	87.2485	-24.1332
156	19.9882	4.93448	-3.224	61.256	-20.032	40.58	-11.8	60.026	13.758	33.473	-19.876	65.192	5.966	58.132	-60.057	30.214	20.462	47.863	-31.825	21.552	-35.441	34.444	8.333	130.433	-28.872	20.071	-48.163	42.925	15.302	92.172	5.348	56.151	-6.825	34.125	-14.879	72.901	-17.955	44.678	-8.914	50.37	-20.1588	14.9649	17.4561	7.1162	-10.6675	57.3619	12.376	87.9583	-24.0536
157	22.0698	7.46655	-3.224	62.868	-20.616	41.854	-10.842	60.799	14.352	34.762	-22.274	67.231	6.441	62.905	-60.691	29.189	20.642	47.85	-33.837	20.952	-35.321	34.484	5.41	128.247	-29.77	19.678	-48.281	43.282	15.049	90.793	4.787	56.653	-6.825	34.125	-16	72.229	-18.552	45.834	-8.963	49.189	-20.4523	12.9652	17.4379	8.85885	-10.4445	58.7382	12.2645	88.2563	-23.7009
158	19.0076	6.53607	-3.224	62.868	-20.995	42.12	-11.479	61.28	13.596	34.611	-23.642	68.421	8.746	61.377	-61.277	30.075	20.647	48.155	-34.546	20.54	-35.201	34.524	6.6	129.767	-30.242	18.375	-48.528	43.375	16.106	91.53	4.127	57.796	-6.825	34.125	-18.338	70.662	-17.166	45.683	-9.176	48.252	-20.2657	13.245	17.7154	8.06715	-11.4023	58.8156	10.151	89.6304	-23.3802
159	20.7594	8.26053	-3.224	62.868	-20.791	42.641	-10.622	62.314	14.579	33.866	-23.956	70.406	8.262	67.404	-62.291	29.198	21.393	49.911	-36.149	21.464	-35.082	34.564	5.926	130.438	-29.387	18.669	-49.211	43.168	14.187	93.03	4.066	58.093	-4.55	36.4	-19.22	69.518	-19.34	45.463	-9.145	51.507	-19.4876	13.1495	19.4285	8.32877	-11.6184	59.4935	12.8833	86.9892	-25.0364
160	18.8416	7.7441	-1.612	62.868	-23.184	43.953	-10.735	62.624	14.306	35.408	-25.406	72.702	8.275	63.347	-62.806	30.997	22.378	49.795	-33.807	21.326	-34.962	34.604	5.55	128.25	-28.502	18.73	-49.52	43.383	15.289	93.265	3.535	58.571	-4.55	36.4	-20.795	68.531	-17.674	46.013	-8.885	49.8	-21.0005	14.1414	19.0349	8.5085	-11.0633	59.1546	8.94075	89.7283	-24.9795
161	16.5142	7.71225	-3.224	64.48	-25.273	46.015	-10.364	63.106	14.873	36.854	-26.073	74.946	11.447	60.785	-61.1	31.167	23.029	47.504	-32.905	20.72	-34.842	34.643	5.475	131.369	-32.181	15.508	-50.088	43.241	15.874	93.685	4.039	58.175	-4.55	36.4	-20.351	67.749	-19.131	45.999	-10.1	50.189	-21.2849	14.9126	19.9381	8.7542	-10.6425	60.5241	11.8505	90.4449	-23.5554
162	20.136	7.60987	-3.224	66.092	-25.148	47.89	-8.942	64.406	16.439	39.45	-25.353	76.558	5.225	71.191	-61.045	36.56	22.241	50.125	-35.085	21.779	-34.723	34.683	7.719	132.565	-26.077	17.212	-50.896	43.325	15.775	95.077	3.003	58.328	-4.55	34.125	-20.888	67.348	-17.971	45.04	-10.344	52.113	-22.6203	15.3403	20.1178	10.0191	-11.8527	59.7483	10.697	90.3971	-24.5313
163	20.8299	9.5186	-3.224	64.48	-26.003	49.137	-10.399	64.493	18.16	38.169	-25.194	76.274	5.055	71.781	-61.784	36.082	22.969	49.276	-36.369	21.519	-34.603	34.723	9.159	133.89	-23.746	17.505	-51.398	43.38	16.034	93.332	2.92	58.998	-2.275	38.675	-21.326	67.113	-16.999	47.287	-10.627	50.151	-20.9801	15.9478	21.0756	10.5878	-11.6594	60.631	13.4703	89.7328	-25.0182
164	20.996	8.71553	-4.836	64.48	-26.828	49.612	-11.045	66.018	17.054	39.782	-25.313	77.476	7.004	74.136	-59.609	35.918	21.657	49.565	-36.405	22.063	-34.483	34.763	8.586	131.221	-26.048	15.377	-52.318	43.892	17.171	94.686	2.591	59.432	-4.55	38.675	-20.813	67.941	-16.278	46.545	-10.091	52.063	-22.5634	14.4986	22.1972	11.7003	-11.7572	59.1068	11.6139	92.4287	-22.0516
165	16.7076	6.83865	-4.836	64.48	-27.417	50.84	-10.513	66.513	18.799	40.202	-26.859	79.388	5.789	74.949	-61.36	35.984	20.529	50.272	-37.095	22.501	-34.363	34.803	6.777	132.01	-25.223	15.294	-52.94	44.972	15.624	93.952	2.203	59.07	-4.55	38.675	-20.422	68.206	-14.843	46.723	-11.005	54.541	-20.3249	14.7101	22.088	9.74155	-12.1235	60.8039	15.5246	90.9045	-23.321
166	19.2533	10.779	-4.836	64.48	-27.601	52.198	-11.844	66.441	19.189	39.132	-28.616	81.064	5.92	75.189	-60.323	39.99	22.833	51.984	-39.231	23.123	-34.244	34.843	7.28	132.289	-24.091	15.837	-53.789	45.487	17.098	96.067	2.163	59.925	-2.275	38.675	-20.353	68.844	-16.056	47.648	-10.947	55.403	-21.1598	14.4121	22.7705	9.48902	-12.3191	62.1712	14.5919	91.8395	-23.1754
167	17.6131	8.44025	-3.224	66.092	-28.428	54.06	-12.015	66.286	18.06	38.072	-30.845	80.942	4.906	75.416	-61.518	37.365	24.582	51.142	-40.486	22.361	-34.124	34.883	5.25	132.123	-24.736	13.688	-53.906	45.355	17.094	95.59	1.049	59.662	-2.275	38.675	-19.501	68.511	-15.479	48.538	-11.68	55.407	-18.4821	14.9103	25.1069	9.6187	-13.7865	63.7364	15.0309	93.7209	-24.8749
168	19.1646	9.66192	-4.836	67.704	-28.618	56.15	-11.865	66.895	18.821	35.942	-31.513	81.07	7.792	76.094	-59.49	37.588	23.347	50.454	-41.429	23.193	-34.004	34.923	2.418	133.484	-22.312	14.637	-54.499	45.119	17.064	94.208	0.66	60.121	-2.275	38.675	-19.662	68.025	-15.827	48.646	-12.242	55.897	-19.7993	14.626	24.9954	11.5411	-11.7413	61.4023	13.8525	93.8483	-25.1751
169	21.8855	9.24333	-4.836	67.704	-29.289	56.644	-11.777	66.57	19.479	35.239	-31.447	82.536	4.575	76.609	-61.642	37.256	22.263	50.775	-43.001	22.727	-33.884	34.963	-1.035	135.082	-21.2	14.778	-54.819	45.128	17.463	95.837	0.472	60.238	-2.275	38.675	-20.29	68.671	-14.206	48.46	-13.23	57.085	-21.0983	14.8102	26.8882	10.0919	-11.6594	62.194	15.172	94.2828	-24.1241
170	18.9189	9.11365	-4.836	66.092	-29.009	57.558	-10.473	66.339	19.035	35.997	-31.991	83.5	8.816	75.773	-60.214	37.634	25.406	50.731	-40.896	22.228	-33.765	35.003	2.1	134.084	-21.374	14.532	-54.589	45.481	16.398	97.469	-0.062	60.043	-2.275	40.949	-20.848	68.545	-13.892	49.105	-11.825	56.717	-20.5614	16.2162	26.4719	10.7221	-13.4088	62.1121	16.7121	94.0758	-23.4962
171	18.9849	10.2671	-4.836	67.704	-29.564	58.994	-10.265	67.153	16.448	36.205	-29.73	85.645	8.857	74.929	-61.76	38.297	25.284	49.959	-42.265	23.064	-33.645	35.043	0.166	134.587	-22.641	14.729	-55.282	46.138	16.056	97.124	-0.255	60.72	-2.275	40.949	-20.572	70.172	-14.164	49.172	-13.453	57.653	-20.8367	16.5688	27.4638	10.8836	-13.2314	61.8732	16.0911	95.4408	-23.9125
172	20.7389	9.61187	-3.224	66.092	-30.356	59.236	-11.032	68.092	15.157	38.183	-30.56	88.08	11.06	77.88	-62.128	37.678	24.455	51.472	-42.411	21.877	-33.525	35.082	-0.622	135.319	-23.169	13.163	-55.607	46.445	14.502	97.292	-0.762	60.44	0	38.675	-22.168	69.709	-12.939	48.206	-14.658	56.927	-21.8354	17.0215	26.5311	10.2239	-11.2248	62.7081	18.2705	95.8002	-25.5619
173	18.3706	10.5014	-3.224	66.092	-30.601	59.998	-10.435	68.154	14.505	38.848	-31.334	89.625	9.872	76.825	-61.006	37.43	23.349	51.331	-42.151	22.742	-33.405	35.122	0.333	134.407	-22.389	14.161	-56.69	47.605	13.919	96.068	-0.654	60.624	0	38.675	-21.54	70.222	-14.079	48.945	-14.032	56.756	-21.5966	18.6459	27.0247	11.4114	-13.3156	63.1358	16.6507	96.9651	-23.7578
174	19.0236	11.1953	-4.836	67.704	-31.477	61.94	-10.364	69.579	13.798	37.179	-31.958	88.66	11.772	76.779	-62.122	36.299	24.086	51.368	-44.588	23.508	-33.286	35.162	-1.681	133.891	-23.52	14.665	-57.182	47.814	14.508	97.606	-1.393	59.896	0	38.675	-25.22	70.806	-12.941	48.399	-14.525	59.277	-22.0675	19.1805	27.3682	10.0055	-15.3335	63.27	17.2286	97.4565	-22.9252
175	19.3853	10.7426	-4.836	66.092	-31.952	62.863	-10.247	69.828	14.25	36.252	-31.879	88.193	11.982	76.375	-62.696	34.927	26.138	53.049	-44.543	22.187	-33.166	35.202	2.088	132.877	-24.431	15.471	-57.709	48.711	14.055	96.986	-1.357	60.311	0	38.675	-26.661	72.144	-12.824	48.977	-14.514	58.527	-20.0041	18.9598	28.3761	11.416	-17.6404	62.8127	17.0489	98.0002	-24.347
176	20.9027	11.4	-4.836	66.092	-32.223	63.038	-9.767	69.667	15.05	37.23	-33.019	90.337	12.756	76.212	-65.055	36.877	25.431	54.022	-44.166	23.758	-33.046	35.242	0.336	136.71	-24.233	15.747	-58.319	49.334	14.044	97.687	-0.719	60.476	0	38.675	-27.914	72.846	-12.497	49.226	-15.208	61.538	-21.8332	20.1042	26.7927	11.9756	-17.5539	61.8345	17.6131	98.1503	-23.9102
177	18.4207	10.6197	-4.836	64.48	-33.688	63.775	-9.555	69.968	15.591	39.526	-33.915	93.652	7.339	75.776	-64.639	36.775	24.461	53.033	-42.135	23.772	-32.927	35.282	0.03	137.315	-23.468	16.821	-58.819	50.019	13.845	99.468	-1.459	59.633	0	38.675	-28.145	73.703	-13.514	47.554	-15.277	60.609	-20.1906	20.6866	28.5012	10.9564	-17.1626	63.3496	15.6019	100.519	-22.4292
178	16.9556	11.5934	-4.836	66.092	-34.438	65.504	-8.819	70.57	16.987	41.699	-35.072	93.038	12.302	75.263	-66.484	36.545	25.421	53.19	-44.169	24.685	-32.807	35.322	-0.628	136.603	-22.529	16.273	-58.916	49.757	13.024	98.826	-1.981	59.293	0	38.675	-28.676	73.262	-12.229	48.542	-15.021	58.382	-21.0233	20.8981	29.0063	11.8846	-16.8759	62.3441	18.9735	99.0581	-25.2752
179	17.9043	11.6298	-3.224	64.48	-34.331	65.392	-6.944	70.059	18.276	40.432	-39.499	95.685	10.877	75.958	-66.757	33.208	26.008	54.026	-44.441	24.844	-32.687	35.362	0.56	134.954	-23.019	18.106	-59.97	49.164	12.111	100.579	-2.394	58.91	0	36.4	-29.751	73.63	-12.075	48.038	-14.68	58.747	-20.1838	22.0402	28.0075	10.7585	-17.6631	62.8127	20.1451	99.7201	-23.3529
180	18.3934	11.6935	-4.836	66.092	-34.542	66.176	-6.187	70.456	17.038	40.122	-41.458	96.745	11.596	73.061	-68.983	33.251	25.017	52.829	-44.317	24.167	-32.567	35.402	3.439	137.138	-22.325	17.059	-60.458	49.227	12.832	99.399	-2.702	58.817	0	36.4	-29.796	74.182	-11.661	49.222	-14.807	56.69	-21.4055	23.5804	29.0586	11.1976	-16.3481	62.1985	20.0632	99.2082	-25.8031
181	19.9813	11.9688	-3.224	64.48	-34.704	66.603	-6.626	70.275	17.895	38.289	-41.815	102.2	12.199	74.163	-70.566	33.845	25.731	53.958	-46.021	24.214	-32.448	35.442	4.484	134.698	-22.613	18.499	-60.947	49.574	9.001	100.875	-2.031	58.741	0	38.675	-29.35	75.23	-11.585	49.232	-15.373	57.744	-20.6866	21.3804	29.55	11.1725	-14.3621	61.9892	19.5582	98.2368	-23.1481
182	19.0258	11.0224	-1.612	66.092	-36.25	66.842	-7.112	71.168	16.742	37.496	-41.583	104.831	11.394	72.778	-71.065	35.539	25.606	54.4	-46.097	25.397	-32.328	35.482	5.779	134.148	-21.864	18.044	-61.563	50.481	5.898	102.087	-2.026	59.173	0	38.675	-29.086	76.954	-10.117	50.289	-14.881	56.757	-19.1919	21.5829	29.6251	10.5787	-13.4566	61.7685	21.2735	99.4721	-22.7637
183	18.3775	11.5138	-1.612	64.48	-36.512	67.228	-6.472	72.238	16.072	38.895	-43.154	106.522	10.526	72.12	-70.907	33.09	25.155	54.478	-46.092	25.834	-32.208	35.521	2.876	133.614	-22.889	18.088	-61.668	50.447	6.273	103.021	-1.797	58.426	2.275	38.675	-28.531	76.569	-10.496	50.39	-14.754	58.313	-20.5182	23.1072	28.7264	9.95768	-13.8616	63.5294	20.0564	98.2095	-26.0055
184	16.5825	9.35708	0	64.48	-36.686	67.726	-5.925	72.225	14.993	40.215	-44.872	108.637	12.032	75.986	-71.816	32.411	24.222	55.868	-46.489	26.602	-32.088	35.561	2.762	132.849	-20.552	17.643	-61.331	50.898	7.052	103.118	-1.636	58.55	2.275	38.675	-29.186	77.039	-13.129	51.687	-13.602	58.867	-20.8026	23.6259	29.7707	13.7546	-13.1404	62.5125	21.1689	98.3937	-25.6461
185	19.1055	9.06133	0	64.48	-36.889	68.185	-4.16	72.583	17.044	41.801	-44.45	107.237	11.199	72.181	-71.117	35.606	27.81	55.348	-46.582	26.179	-31.969	35.601	5.744	131.199	-20.647	17.808	-62.384	51.196	5.727	104.526	-1.955	58.125	4.55	38.675	-29.152	77.696	-12.786	50.763	-14.916	56.57	-21.4055	24.5268	29.004	12.2554	-15.04	62.0074	19.8175	100.792	-24.024
186	16.2685	12.012	1.612	64.48	-36.14	69.17	-2.93	73.135	17.524	41.271	-44.514	109.395	12.067	70.425	-72.42	37.035	27.313	54.238	-44.741	26.004	-31.849	35.641	4.973	130.702	-21.815	17.491	-62.349	50.684	5.494	102.535	-1.296	58.694	4.55	38.675	-28.253	78.511	-12.005	49.166	-13.09	57.243	-20.7184	23.2095	29.8867	13.1313	-14.6191	57.2413	20.7048	100.76	-21.7171
187	14.7329	9.37982	1.612	62.868	-36.412	69.891	-1.855	74.688	17.696	39.3	-45.483	112.15	11.317	69.202	-71.52	38.694	26.463	55.592	-45.107	25.903	-31.729	35.681	5.16	131.91	-23.554	18.946	-62.614	49.995	6.235	103.29	-1.925	58.169	4.55	38.675	-25.778	80.23	-12.827	48.433	-13.467	55.329	-21.2348	21.8423	30.253	15.0582	-15.9682	55.8786	22.0971	100.607	-25.6961
188	16.2094	10.7243	1.612	62.868	-35.45	70.496	0.286	75.228	17.984	39.032	-48.582	112.327	8.047	73.531	-74.592	37.118	26.93	56.032	-44.674	27.999	-31.609	35.721	4.201	133.675	-21.969	19.569	-62.81	50.388	7.069	104.124	-1.848	59.328	2.275	40.949	-24.928	80.914	-13.05	47.694	-10.967	56.49	-22.0152	24.3584	29.2656	13.5522	-15.0082	55.7079	22.386	101.806	-27.3
189	11.4433	8.54945	4.836	61.256	-36.41	71.335	0.953	75.511	16.912	38.561	-49.929	112.698	10.563	72.441	-74.697	38.459	27.157	55.298	-45.079	28.685	-31.49	35.761	6.228	133.359	-24.17	21.089	-63.169	50.499	7.078	104.059	-1.942	59.937	4.55	38.675	-23.801	83.444	-13.723	47.681	-12.311	53.86	-22.0243	22.8137	29.2793	12.8446	-13.8434	56.8773	23.3506	102.022	-26.7608
190	12.7173	9.02948	4.836	62.868	-36.087	71.855	1.618	75.945	17.628	37.798	-49.267	114.044	10.962	70.257	-73.394	37.604	27.777	53.071	-46.619	28.577	-31.37	35.801	5.731	132.806	-26.413	21.144	-63.444	50.11	8.31	103.528	-2.08	60.281	4.55	40.949	-22.7	84.261	-12.124	45.998	-10.582	55.945	-23.346	21.9446	27.6322	14.8285	-12.8856	56.9478	23.9103	101.456	-28.6718
191	13.6136	10.4422	6.448	61.256	-37.177	72.397	0.747	76.772	15.422	37.986	-52.307	114.173	14.078	69.326	-75.275	35.858	27.293	57.023	-45.981	31.162	-31.25	35.841	5.366	135.171	-26.387	23.513	-63.839	50.39	7.945	104.894	-2.091	61.164	4.55	43.224	-21.225	85.605	-13.14	45.884	-9.684	57.185	-23.776	22.2245	28.7674	14.7261	-12.6308	56.8318	24.1241	100.978	-28.2851
192	12.194	11.0702	4.836	61.256	-38.148	74.69	1.686	77.361	15.114	41.979	-51.396	115.885	9.986	71.252	-76.043	39.713	27.204	56.064	-46.006	31.805	-31.131	35.881	8.452	136.428	-27.059	23.537	-64.292	50.117	7.889	106.129	-1.407	61.598	4.55	43.224	-20.694	85.845	-13.262	45.272	-9.423	53.119	-23.1959	23.0002	26.8791	16.223	-12.326	57.9329	25.1024	102.02	-29.4408
193	10.4172	9.64828	6.448	61.256	-39.62	75.256	1.93	77.826	12.526	44.209	-52.249	115.158	11.099	69.986	-78.06	37.768	29.714	57.565	-45.86	33.038	-31.011	35.921	8.855	138.896	-25.931	24.61	-64.866	50.712	6.248	106.064	-1.959	63.02	4.55	43.224	-19.129	86.757	-13.762	45.316	-9.554	56.584	-22.4633	23.6259	27.6208	14.1323	-11.6321	57.8305	25.7735	101.649	-28.9517
194	9.95995	10.2921	6.448	61.256	-39.751	76.055	2.265	77.793	12.206	45.686	-51.193	115.645	14.4	71.68	-76.139	40.015	28.301	58.001	-46.919	33.315	-30.891	35.961	12.042	138.809	-27.906	24.315	-65.378	50.457	7.144	107.071	-1.543	63.107	4.55	45.499	-16.444	87.038	-13.356	44.652	-10.197	54.982	-23.7305	23.3119	28.4398	12.9425	-10.6516	57.6098	26.5629	101.774	-28.6332
195	10.101	9.8007	6.448	62.868	-39.931	76.958	1.831	78.29	12.489	46.474	-52.144	117.603	13.193	73.428	-76.799	39.193	28.304	54.729	-47.416	33.521	-30.771	36	8.427	137.927	-27.749	24.592	-66.167	50.598	7.729	107.797	-0.666	62.739	6.825	43.224	-13.924	86.081	-12.116	44.396	-9.404	56.249	-23.8056	23.023	28.8334	13.311	-11.3727	57.2413	25.3754	100.98	-28.9061
196	11.6548	10.3581	8.06	61.256	-39.892	77.901	1.675	79.44	12.65	48.941	-53.29	119.047	13.345	72.624	-76.333	41.391	28.887	55.713	-45.856	33.192	-30.652	36.04	11.019	141.112	-28.075	25.478	-66.814	51.158	7.846	107.82	-1.624	62.366	4.55	45.499	-13.36	86.015	-12.617	44.057	-5.866	56.386	-25.0227	24.2014	28.6013	13.2428	-12.31	56.991	26.4014	101.31	-31.2335
197	12.8856	11.4478	8.06	62.868	-40.685	78.211	1.784	80.17	12.982	51.249	-53.436	119.21	4.798	71.681	-78.03	39.722	29.98	57.081	-45.477	32.06	-30.532	36.08	11.922	139.957	-29.706	26.283	-67.478	50.832	9.072	107.794	-1.695	62.06	4.55	45.499	-11.347	84.829	-12.081	43.049	-6.581	57.802	-24.5541	25.0523	28.549	14.6556	-12.2258	55.2757	25.5801	102.188	-29.484
198	8.29693	9.16143	8.06	62.868	-40.157	78.647	2.859	80.199	13.513	50.877	-52.439	120.811	6.382	73.961	-76.584	40.676	26.857	55.521	-45.198	34.011	-30.412	36.12	8.575	141.967	-29.944	26.618	-68.095	51.315	9.448	108.96	-2.236	62.261	6.825	45.499	-10.9	85.429	-11.701	44.17	-3.918	57.86	-24.272	23.8488	28.4216	15.4564	-13.3201	53.9084	27.0998	103.56	-26.6676
199	10.6129	10.6925	8.06	62.868	-41.187	79.289	2.588	80.849	13.657	47.351	-51.883	122.427	1.518	71.217	-80.348	40.077	26.167	58.849	-45.145	34.15	-30.292	36.16	11.201	143.854	-29.519	26.969	-68.152	52.264	11.466	109.995	-1.828	62.202	4.55	47.774	-8.817	86.972	-13.264	45.044	-8.436	51.098	-24.1309	24.5791	29.0882	14.0481	-14.0436	54.8594	25.7598	103.401	-31.486
200	9.63463	10.4013	8.06	64.48	-41.473	79.616	2.218	81.281	13.675	47.468	-51.922	123.698	-0.004	69.921	-78.406	41.486	26.683	57.793	-44.092	34.368	-30.173	36.2	12.757	142.001	-29.86	25.883	-68.043	51.22	11.778	110.124	-1.766	61.984	6.825	45.499	-7.584	85.657	-14.362	44.399	-6.513	51.228	-23.9262	25.1205	29.459	15.2038	-12.3623	55.3735	27.3819	102.905	-29.5431
201	10.7448	10.7175	8.06	64.48	-41.743	80.319	2.268	81.656	13.192	46.166	-53.718	126.769	-0.914	69.223	-79.512	42.155	28.635	56.619	-43.286	36.737	-30.053	36.24	11.549	140.764	-31.734	27.253	-68.281	52.875	11.356	111.585	-2.151	62.929	4.55	50.049	-5.887	87.95	-15.318	45.33	-7.388	47.665	-23.8284	25.621	28.9903	15.561	-13.691	56.8136	27.8414	103.26	-32.0593
202	10.0987	11.9256	8.06	66.092	-40.984	80.92	3.548	82.23	15.101	44.661	-57.057	128.077	-3.29	72.66	-80.069	40.786	27.511	57.797	-44.198	37.619	-29.933	36.28	8.027	144.564	-35.183	28.751	-68.653	52.716	11.669	113.703	-1.889	62.064	2.275	52.324	-4.317	89.4	-16.65	46.415	-9.908	45.694	-25.3526	24.9226	27.7254	17.5016	-13.6773	56.5656	27.9757	104.761	-32.3551
203	9.61188	11.7617	9.672	66.092	-41.274	81.558	4.074	83.645	15.337	45.457	-58.502	128.431	-6.513	69.911	-78.997	42.667	27.903	55.465	-43.276	36.368	-29.813	36.32	10.839	145.048	-33.501	26.758	-68.501	52.615	10.739	112.389	-2.054	60.918	4.55	50.049	-3.353	90.52	-16.402	46.118	-10.808	46.461	-23.0503	24.8407	29.3771	14.1232	-15.9364	57.4892	26.4969	104.793	-30.2393
204	10.4013	12.9197	8.06	67.704	-41.218	81.969	4.408	84.479	15.302	47.09	-59.197	129.979	-7.978	69.362	-80.931	41.008	27.412	59.537	-44.178	38.157	-29.694	36.36	9.835	145.058	-35.427	27.846	-68.452	52.792	9.714	112.857	-2.012	61.341	2.275	50.049	-2.44	91.807	-16.483	47.247	-10.667	45.985	-23.3324	25.7052	30.1574	14.8853	-16.1912	59.0795	27.1885	105.437	-29.2337
205	10.1465	12.6672	9.672	67.704	-41.63	81.684	4.572	85.011	15.926	47.042	-60.998	132.063	-8.269	70.613	-82.149	41.51	28.185	59.971	-44.403	39.139	-29.574	36.4	10.426	144.637	-34.601	27.523	-68.966	52.947	11.641	112.489	-1.965	60.951	4.55	52.324	-1.126	92.827	-17.029	48.026	-9.975	46.726	-23.4939	24.9567	28.7924	15.4837	-15.4586	59.9986	26.3218	104.523	-29.0563
206	12.3965	12.1212	9.672	67.704	-41.883	82.208	4.854	86.275	16.01	46.857	-61.417	135.37	-6.172	71.194	-83.936	39.166	28.159	57.162	-44.555	39.334	-29.574	34.125	10.432	143.313	-35.976	27.566	-69.378	52.79	9.926	113.692	-1.173	59.284	4.55	52.324	-0.891	92.295	-16.336	49.074	-10.424	44.202	-23.9603	26.0465	29.7365	15.6793	-15.8795	60.8949	25.8213	106.763	-28.1599
207	9.72563	10.7266	8.06	69.316	-41.291	82.762	5.676	86.843	17.98	44.855	-62.532	138.286	-8.93	72.983	-82.87	42.539	28.835	58.108	-44.709	38.376	-27.299	36.4	11.396	144.398	-35.192	28.68	-69.628	52.967	11.013	113.304	-0.775	58.74	2.275	54.599	-0.641	92.391	-15.865	48.895	-10.651	44.786	-24.6655	25.8326	27.8187	14.7556	-16.405	60.8927	26.5424	105.021	-26.8245
208	9.4094	11.9142	9.672	70.928	-41.055	83.955	5.977	87.19	19.308	47.17	-63.27	142.147	-11.338	71.157	-82.08	46.093	29.335	58.752	-46.654	38.891	-27.299	34.125	10.138	143.397	-37.335	27.586	-69.881	52.843	10.9	114.154	0.393	58.463	2.275	54.599	1.189	92.733	-16.149	48.828	-10.272	42.849	-25.5119	25.2639	29.0154	14.9445	-15.5041	61.4751	26.9542	105.194	-27.9802
209	9.42988	10.0669	9.672	69.316	-39.338	84.433	8.038	87.125	22.309	47.381	-63.76	144.524	-10.241	72.551	-80.043	46.053	28.662	60.542	-45.622	40.284	-27.299	31.85	12.879	143.028	-38.558	27.761	-70.325	52.906	11.35	113.748	0.126	58.671	2.275	54.599	1.74	93.956	-16.395	49.98	-9.463	44.292	-25.7257	25.8485	28.9926	14.742	-16.057	61.3704	25.3708	105.617	-28.3465
210	10.9177	11.052	9.672	70.928	-39.698	84.784	9.153	86.869	23.693	47.61	-64.677	147.578	-10.25	71.601	-82.552	44.959	27.967	59.605	-46.467	40.513	-27.299	29.575	11.8	141.873	-40.171	28.683	-70.167	52.86	10.927	114.409	0.389	57.449	2.275	52.324	1.997	91.873	-16.229	50.04	-8.657	43.905	-26.6198	25.5346	29.823	14.7943	-16.1775	62.3191	26.349	106.502	-27.6799
211	10.8427	12.1371	9.672	69.316	-40.073	85.639	9.373	87.339	23.425	47.85	-66.906	150.446	-12.328	75.554	-81.783	46.964	27.116	56.026	-47.726	42.875	-27.299	29.575	12.204	141.618	-39.903	30	-70.208	53.578	11.222	114.808	0.139	58.386	0	56.874	3.334	92.196	-16.565	50.232	-9.025	43.256	-26.117	27.4115	28.2965	14.1687	-14.833	62.2099	25.1933	106.427	-28.9767
212	10.87	11.9779	9.672	70.928	-40.917	87.28	9.547	87.605	22.335	48.504	-66.881	150.498	-12.2	75.161	-84.074	45.469	26.928	58.444	-46.788	42.067	-31.849	31.85	12.439	144.047	-41.033	29.049	-69.83	53.607	10.366	115.58	-0.17	57.923	0	54.599	5.308	91.829	-16.01	49.467	-7.128	43.526	-28.4671	26.9633	30.485	15.1242	-15.3722	63.2905	24.8407	106.224	-30.4531
213	12.5307	13.5044	9.672	70.928	-40.054	87.97	10.577	87.762	22.672	48.182	-67.197	153.761	-13.463	75.228	-85.355	46.154	27.961	57.364	-46.627	42.567	-31.849	31.85	11.197	142.382	-41.504	28.583	-69.801	53.764	10.927	115.524	1.145	57.33	2.275	52.324	5.482	91.568	-15.42	49.778	-7.515	44.176	-27.4092	27.8505	30.2757	15.3881	-14.9126	67.5402	25.9646	107.444	-29.1473
214	13.2428	13.1722	9.672	70.928	-40.213	89.128	11.398	87.902	22.537	46.296	-67.195	156.082	-10.536	80.257	-85.25	46.345	31.034	58.764	-48.437	43.855	-34.124	31.85	13.553	143.578	-42.276	28.297	-69.527	54.236	10.758	114.817	1.219	57.399	2.275	56.874	6.045	92.388	-14.626	48.854	-4.856	40.883	-29.0517	28.2851	27.8688	18.3183	-15.9455	67.0124	26.3809	107.569	-32.3073
215	10.7198	11.5092	9.672	72.54	-38.837	89.392	12.59	88.597	25.124	46.595	-66.897	159.442	-9.165	79.773	-84.882	46.808	28.076	60.019	-47.846	43.807	-29.574	31.85	12.436	142.96	-41.861	28.588	-69.618	55.197	12.726	115.122	2.09	57.326	2.275	54.599	6.078	93.211	-15.603	48.923	-5.731	41.594	-27.5821	28.276	31.0924	17.1489	-17.5198	69.7265	26.4833	107.091	-31.2562
216	11.4979	12.2941	9.672	72.54	-38.406	90.101	11.525	87.998	25.435	47.43	-68.358	159.448	-9.632	79.891	-83.856	46.086	28.091	58.938	-48.633	44.457	-27.299	29.575	13.174	144.188	-43.396	30.335	-69.232	55.375	12.941	116.389	2.323	56.375	2.275	54.599	7.053	92.996	-15.586	48.951	-4.361	41.484	-28.2259	28.781	30.237	16.5893	-16.8441	70.3089	26.0328	107.523	-30.0891
217	13.7001	13.7933	9.672	74.152	-38.826	90.36	10.161	88.431	25.931	50.136	-71.855	160.487	-10.063	81.699	-87.467	50.286	30.333	59.059	-49.285	44.454	-34.124	31.85	13.419	143.072	-43.047	28.437	-69.661	54.776	14.367	115.823	2.506	55.974	4.55	54.599	6.994	93.095	-13.415	48.814	-4.309	41.956	-27.7118	26.9223	30.4236	15.3858	-15.9864	71.5283	26.3263	107.255	-31.1038
218	11.7436	13.6614	9.672	72.54	-39.644	89.919	9.577	89.895	26.646	52.791	-77.271	162.524	-8.728	83.156	-87.639	51.253	29.221	58.776	-49.723	46.456	-31.849	31.85	15.641	143.623	-43.84	28.384	-69.74	56.699	14.703	118.099	2.309	57.757	2.275	56.874	7.44	94.946	-13.903	48.063	-5.053	42.206	-26.6311	26.6289	30.2825	16.2571	-16.0251	73.2209	26.8382	107.157	-32.3232
219	12.5239	14.4485	9.672	74.152	-39.753	91.745	8.705	90.425	27.761	54.56	-79.358	165.367	-6.839	85.25	-84.774	45.721	28.416	59.938	-49.1	46.915	-29.574	29.575	17.01	142.536	-44.755	29.336	-69.009	56.735	15.44	118.303	2.605	56.556	2.275	56.874	7.241	94.819	-14.307	48.937	-2.794	42.453	-26.3877	28.0507	30.758	15.5883	-16.4664	73.2209	27.2727	108.326	-30.394
220	11.1157	13.2178	9.672	75.764	-38.911	92.168	8.507	90.95	28.362	55.022	-81.084	166.665	-10.736	86.55	-85.019	47.687	24.57	58.415	-50.128	47.225	-31.849	29.575	13.135	140.041	-43.917	28.89	-68.72	55.813	17.339	117.606	3.479	56.713	2.275	56.874	7.778	95.19	-12.572	48.778	-2.362	41.599	-25.4891	28.2532	32.3414	15.6952	-14.8694	72.8432	27.2818	108.122	-33.4061
221	11.1384	13.3338	11.284	74.152	-37.479	93.723	9.044	90.962	31.048	56.043	-83.539	167.223	-10.655	85.403	-84.631	48.759	25.84	60.366	-49.614	47.841	-29.574	29.575	15.652	140.356	-43.444	27.819	-68.657	55.076	17.555	117.419	2.508	56.5	4.55	54.599	7.286	95.177	-11.91	48.508	-1.989	42.1	-24.7179	28.0235	30.8809	15.6952	-14.9354	72.6317	28.1122	107.221	-33.3197
222	9.23195	12.8651	11.284	77.376	-37.67	94.382	8.141	91.122	32.231	58.483	-84.026	168.165	-10.562	87.435	-85.553	49.744	26.826	57.563	-49.62	49.338	-29.574	27.3	15.076	139.03	-44.372	26.322	-68.593	55.281	17.331	117.501	2.963	56.97	4.55	56.874	6.596	96.722	-7.809	49.187	-1.789	41.978	-23.5736	27.0179	31.2517	17.6199	-13.5977	72.4883	26.9474	109.293	-32.4756
223	11.3887	14.1732	11.284	75.764	-38.562	95.33	6.377	92.364	33.498	59.301	-84.672	169.451	-13.336	89.655	-86.745	52.276	29.547	60.343	-48.487	49.326	-31.849	29.575	12.326	140.343	-45.263	29.127	-68.225	56.212	16.666	119.466	2.441	57.816	4.55	56.874	5.865	98.502	-8.68	49.36	-1.746	44.14	-27.2431	27.8915	31.3177	17.8064	-13.2814	72.0834	26.4378	109.826	-32.7327
224	10.581	13.6022	9.672	75.764	-38.282	96.106	4.617	93.058	36.776	60.766	-84.353	170.373	-13.385	87.854	-88.057	52.538	26.28	59.85	-48.778	50.798	-29.574	27.3	13.028	137.535	-45.238	28.129	-68.685	55.345	17.085	117.988	2.665	57.632	4.55	54.599	6.176	98.427	-9.637	49.126	0.706	42.814	-26.0374	29.0313	30.7011	17.9407	-11.9119	71.5055	27.2681	108.408	-32.148
225	12.5489	15.5678	11.284	77.376	-36.68	96.642	5.033	93.091	37.09	60.541	-86.92	171.39	-12.868	91.963	-86.077	54.385	27.915	60.889	-48.646	49.528	-34.124	29.575	10.293	143.4	-46.447	29.068	-69.21	55.622	17.756	117.459	1.991	57.411	4.55	56.874	6.476	97.342	-9.061	49.436	-2.42	43.048	-25.9737	28.8038	31.5383	19.1419	-12.2668	70.3498	26.1056	107.539	-34.0112
226	16.3049	14.9467	11.284	77.376	-39.054	97.716	2.048	93.412	35.556	60.926	-88.312	173.054	-14.602	90.861	-87.542	54.445	29.556	62.302	-49.259	51.576	-34.124	31.85	11.915	138.626	-46.851	27.82	-69.629	56.039	17.582	118.306	1.917	57.664	4.55	56.874	7.052	96.784	-10.46	50.407	1.105	43.216	-26.7199	29.6273	31.3609	18.4707	-12.2986	70.2952	26.1124	109.837	-34.7006
227	12.9675	14.99	11.284	77.376	-39.775	98.187	0.497	94.706	34.859	59.314	-89.824	175.141	-12.645	92.857	-87.426	53.472	27.839	61.079	-48.656	50.395	-29.574	29.575	10.011	140.913	-48.332	26.79	-69.568	55.301	17.646	117.778	1.02	57.417	4.55	54.599	8.389	95.181	-10.405	50.383	-0.988	43.098	-25.0933	29.5045	30.369	17.9748	-13.1836	70.6547	27.5366	109.584	-35.1396
228	11.9938	15.222	11.284	77.376	-40.243	99.262	0.646	94.868	37.207	59.555	-90.206	176.189	-11.777	93.476	-85.877	50.899	27.727	63.933	-50.189	52.897	-29.574	29.575	12.084	139.458	-48.783	28.844	-69.67	56.221	19.267	117.772	0.718	57.97	6.825	56.874	9.577	96.124	-11.316	50.586	1.15	43.4	-25.7484	28.1122	28.8311	18.498	-12.0507	69.9267	26.3968	110.84	-34.0681
229	13.0949	14.0413	11.284	77.376	-40.855	99.831	0.657	95.5	36.484	58.65	-91.137	177.409	-12.629	92.45	-87.374	52.074	29.613	62.306	-48.412	54.195	-27.299	31.85	13.929	140.008	-48.691	29.88	-69.712	57.029	19.004	118.148	0.466	57.701	6.825	56.874	9.462	97.273	-12.622	51.307	2.283	41.017	-25.7712	29.4203	29.2565	19.6264	-12.5148	70.8981	24.9704	109.978	-33.3856
230	14.4736	16.1047	12.896	77.376	-41.089	99.746	-0.149	96.34	38.154	58.264	-91.828	178.945	-10.812	94.776	-88.752	55.998	27.782	61.058	-47.138	52.836	-31.849	34.125	14.153	137.926	-48.605	26.601	-69.691	55.511	18.635	117.227	0.641	57.138	6.825	54.599	7.984	97.216	-12.733	50.693	3.44	39.96	-24.5677	30.0823	27.5867	17.4856	-13.7501	72.1016	26.051	111.118	-32.3141
231	13.5954	16.2503	12.896	80.6	-41.807	100.918	-1.318	96.415	37.428	59.01	-92.074	180.535	-14.416	96.256	-87.11	52.371	26.807	62.071	-45.274	51.596	-29.574	34.125	15.722	137.9	-48.561	25.038	-70.197	55.482	19.259	116.685	0.685	56.846	6.825	54.599	6.488	98.966	-12.177	50.549	0.471	40.255	-25.7394	28.8652	27.0202	17.6813	-14.2551	71.2849	26.2558	110.979	-32.8555
232	14.1983	17.6404	12.896	78.988	-42.258	101.756	-1.358	95.957	38.54	59.519	-91.792	182.568	-14.902	95.687	-91.763	56.295	30.617	62.48	-43.881	53.97	-31.849	36.4	15.614	138.601	-46.5	28.344	-70.159	55.579	17.687	117.12	-0.508	56.905	6.825	54.599	7.431	99.623	-11.469	49.567	1.486	40.66	-25.8804	29.716	26.8564	18.1409	-14.8694	73.9284	25.0591	110.499	-31.8432
233	13.4521	14.2916	12.896	78.988	-42.146	103.377	-1.738	97.201	38.759	57.391	-92.459	183.865	-12.686	95.719	-94.753	60.666	27.382	63.06	-43.937	54.283	-31.849	36.4	17.733	132.976	-46.312	26.499	-70.273	56.897	17.163	117.481	0.08	56.786	6.825	56.874	6.811	100.715	-12.32	49.779	3.911	42.481	-26.2944	30.4827	26.8154	18.4207	-15.2835	74.19	26.2421	111.552	-32.6462
234	14.1824	18.3957	12.896	78.988	-42.488	104.19	-1.931	97.197	37.295	58.771	-91.085	187.188	-10.243	95.693	-95.603	62.438	27.546	61.91	-44.034	55.242	-29.574	38.674	17.408	133.72	-45.443	25.41	-69.489	56.122	18.617	119.069	-0.852	56.624	6.825	56.874	7.665	100.025	-13.124	47.914	4.744	40.044	-27.4319	30.0368	27.2613	16.4619	-15.1242	75.0727	27.1817	110.701	-31.6771
235	14.7375	19.4763	14.508	80.6	-43.016	105.358	-1.705	97.337	37.714	59.177	-88.518	193.697	-13.186	91.838	-95.563	61.969	29.62	62.721	-41.445	54.644	-31.849	40.949	17.734	136.598	-45.605	26.354	-69.282	56.029	16.04	119.189	-0.45	56.601	6.825	56.874	8.026	98.596	-13.249	49.104	7.88	40.018	-27.0771	29.9208	28.3056	16.2185	-15.2812	75.4413	27.1612	112.226	-32.2254
236	18.084	21.0801	14.508	82.212	-41.866	106.813	-0.923	97.029	35.935	59.116	-87.448	199.177	-9.979	92.462	-95.599	62.102	28.398	63.948	-41.156	53.857	-29.574	40.949	18.459	134.768	-45.476	25.36	-69.019	55.954	16.552	120.321	-0.143	56.221	6.825	59.149	7.372	97.491	-15.16	49.117	8.56	41.829	-26.6129	30.3121	27.3956	14.6919	-15.6747	75.3662	26.3468	111.418	-31.1425
237	18.4389	19.8243	12.896	80.6	-42.157	107.234	-1.475	97.55	36.861	58.983	-87.991	204.002	-9.955	93.891	-97.064	62.564	26.345	64.645	-39.487	53.164	-29.574	43.224	19.899	137.785	-45.694	24.439	-69.122	56.192	16.835	120.381	-1.33	57.12	6.825	59.149	7.626	96.961	-17.186	49.383	9.861	43.199	-25.7416	31.6521	26.5652	14.0163	-13.6455	77.6844	26.7904	111.869	-29.4658
238	16.8805	20.0291	12.896	80.6	-40.823	109.047	0.23	97.995	39.355	59.415	-88.315	205.768	-6.558	95.53	-97.532	61.706	29.726	62.906	-37.076	53.995	-29.574	45.499	19.356	129.809	-45.866	24.186	-69.272	56.943	16.251	122.128	-1.635	57.16	9.099	56.874	6.507	97.891	-16.97	50.585	9.517	42.279	-26.8313	30.6852	26.8314	15.5474	-13.8161	77.1794	26.4332	111.352	-27.9074
239	18.6095	20.1656	12.896	80.6	-41.98	110.143	-0.188	98.877	36.549	58.318	-86.645	207.977	-12.875	93.343	-98.411	62.407	27.789	63.372	-36.403	49.22	-29.574	43.224	18.897	135.615	-47.366	19.686	-70.14	56.255	15.457	121.771	-1.724	56.716	6.825	59.149	7.274	96.021	-16.616	49.173	10.17	41.641	-25.8804	31.8955	27.027	15.7066	-14.2461	77.7572	27.4092	111.22	-28.9175
240	19.4444	19.9927	12.896	80.6	-42.649	111.485	0.029	98.534	36.861	57.518	-86.663	209.199	-6.066	94.319	-100.812	65.236	27.333	63.153	-34.607	51.314	-29.574	44.741	20.641	135.667	-43.256	27.099	-69.657	56.532	17.158	121.581	-1.852	55.295	6.825	59.149	7.947	95.984	-17.085	48.095	10.203	41.039	-25.5482	29.8343	27.2363	17.8451	-14.4531	78.8242	26.2785	111.393	-27.8619
241	20.4318	21.9219	12.896	80.6	-43.687	112.184	-1.413	98.607	35.798	57.824	-86.725	210.781	-7.176	93.615	-99.992	63.067	27.293	64.281	-33.915	50.02	-29.574	46.258	20.49	132.195	-45.297	23.807	-69.546	57.627	17.749	122.33	-2.866	55.581	9.099	59.149	8.904	95.756	-18.614	48.875	9.738	43.506	-25.0614	29.782	27.159	18.6982	-12.7718	78.7218	26.299	112.537	-27.0566
242	20.2521	21.724	12.896	82.212	-44.336	112.579	-1.808	99.192	31.705	59.512	-88.825	211.894	-5.268	93.728	-101.545	65.459	28.948	65.368	-32.215	49.345	-29.574	47.774	21.091	133.965	-44.579	23.471	-70.146	57.54	18.199	120.883	-2.12	54.905	6.825	59.149	10.223	94.855	-20.046	47.277	9.685	40.69	-25.2593	29.6614	25.7212	20.3999	-14.2847	80.1323	26.7927	112.044	-28.3715
243	18.3957	24.3493	11.284	82.212	-44.774	114.03	-1.918	99.214	33.62	57.984	-90.048	212.96	-11.811	96.731	-102.173	64.437	29.706	68.305	-32.424	48.823	-31.849	45.499	21.087	133.72	-43.955	23.624	-69.859	57.332	17.199	121.256	-2.41	54.029	6.825	56.874	8.298	95.139	-19.155	47.895	9.186	42.27	-25	29.5181	25.3481	20.1497	-14.2096	81.4291	25.5846	112.888	-28.8538
244	16.4869	20.814	12.896	82.212	-44.19	115.822	-1.465	99.566	36.696	58.248	-92.196	215.456	-10.934	95.344	-102.994	67.066	27.932	67.042	-32.017	49.564	-29.574	45.499	22.324	132.758	-44.328	31.529	-68.598	58.17	19.432	120.182	-2.422	53.748	9.099	59.149	8.691	94.262	-18.162	47.251	10.25	45.993	-23.2232	28.2236	23.726	22.1812	-13.5499	82.4005	27.4866	112.244	-25.6666
245	18.5367	22.8274	12.896	83.824	-44.985	116.419	-1.582	99.77	36.099	56.646	-94.674	215.684	-10.132	95.932	-102.353	66.952	28.844	66.429	-29.815	49.571	-29.574	45.499	20.921	134.433	-49.844	17.77	-68.195	58.195	17.915	122.113	-2.084	53.253	6.825	59.149	6.412	96.046	-18.452	45.945	9.414	45.204	-24.909	29.2087	24.3493	20.0359	-14.8102	82.4164	28.2191	114.405	-27.35
246	19.5536	24.0217	12.896	82.212	-45.109	116.895	-1.132	99.853	36.298	57.11	-98.5	215.176	-12.6	97.12	-101.68	67.151	28.841	64.934	-28.955	49.866	-29.574	45.499	21.162	131.995	-51.917	15.606	-67.953	58.209	18.327	123.055	-3.467	53.015	6.825	59.149	1.875	98.36	-18.361	46.813	10.815	50.219	-24.4995	27.3478	23.6555	21.5784	-15.0491	82.0138	28.0963	113.695	-25.207
247	19.0167	22.0129	12.896	83.824	-44.835	117.355	-0.423	100.958	36.825	58.081	-102.555	214.872	-9.133	98.097	-101.03	68.386	25.669	65.31	-28.007	50.332	-29.574	45.499	19.994	129.751	-55.671	10.537	-68.108	58.515	18.483	123.976	-3.265	53.722	9.099	59.149	0.109	98.733	-17.181	47.395	10.436	51.824	-26.0396	27.3637	22.4588	20.8322	-16.2571	82.7349	25.7166	114.742	-27.5434
248	17.3673	22.8774	11.284	83.824	-45.606	118.463	1.075	101.534	36.771	56.837	-105.067	215.8	-13.174	99.946	-101.794	71.272	26.733	67.232	-27.182	49.684	-29.574	43.224	19.832	130.718	-55.973	9.762	-67.807	57.605	17.566	124	-3.744	53.947	9.099	59.149	-1.025	98.423	-14.519	47.827	11.605	55.551	-25.5892	28.2441	21.6717	20.8254	-17.0511	82.3323	26.5129	112.092	-27.3364
249	17.4402	23.4462	11.284	85.436	-45.861	118.698	1.158	101.587	37.275	57.575	-107.117	214.689	-12.003	97.393	-102.873	68.658	27.951	68.128	-25.65	51.733	-29.574	43.224	20.759	129.2	-57.572	10.449	-67.542	57.919	17.684	126.042	-3.829	54.248	6.825	61.424	-2.467	97.732	-14.864	47.003	8.427	49.135	-27.0088	27.9939	20.0132	20.1747	-21.9355	81.536	26.5606	114.84	-25.1956
250	19.9631	22.4338	11.284	87.048	-46.25	118.035	0.82	101.919	37.8	60.16	-109.511	214.867	-11.935	97.618	-102.616	64.442	28.164	67.028	-24.842	52.183	-27.299	43.224	20.737	126.795	-57.096	9.493	-67.108	57.854	16.686	125.605	-4.21	53.887	9.099	61.424	-2.773	96.395	-15.418	47.617	8.59	49.908	-26.6289	29.2178	19.7925	19.4103	-23.1913	80.7921	25.2275	116.041	-26.6198
251	15.5519	21.8741	11.284	83.824	-47.425	116.198	-0.223	101.146	38.794	59.827	-112.166	214.988	-14.097	101.186	-103.454	68.262	30.674	66.385	-22.747	50.658	-27.299	40.949	19.085	131.659	-57.543	8.78	-67.06	56.959	16.362	124.683	-4.789	53.625	9.099	59.149	-2.828	93.968	-15.679	47.565	11.508	55.788	-25.4049	29.5886	20.3613	21.4146	-23.5349	80.692	26.5447	115.729	-24.7952
252	17.9566	23.6918	9.672	83.824	-47.643	115.249	0.27	101.325	39.877	61.999	-113.585	217.055	-12.132	101.164	-102.263	68.581	30.605	64.776	-21.997	50.432	-27.299	40.949	19.459	130.516	-58.25	8.241	-66.808	56.999	16.047	125.433	-4.981	53.316	9.099	59.149	-4.365	94.009	-15.293	48.059	11.818	54.705	-26.2603	30.2256	19.0349	23.7578	-22.9912	80.7261	27.5502	116.48	-26.0419
253	17.3605	24.4562	9.672	87.048	-50.02	114.656	-2.024	101.484	37.683	62.45	-116.763	218.501	-12.63	100.882	-105.763	67.295	32.143	65.45	-19.469	51.747	-27.299	40.949	18.666	128.656	-58.691	11.843	-66.793	57.365	14.253	126.231	-5.391	53.255	9.099	59.149	-4.892	91.829	-13.5	50.258	11.152	55.488	-29.0517	30.4668	18.6709	23.7374	-23.7146	79.5067	30.3804	115.957	-27.3523
254	18.4502	25.6484	11.284	87.048	-51.678	113.838	-2.31	101.348	38.508	63.644	-117.637	219.439	-18.035	98.736	-106.728	71.691	32.77	65.339	-17.481	50.955	-29.574	40.949	16.625	127.121	-59.25	11.245	-66.826	57.114	14.163	125.769	-5.681	52.877	9.099	59.149	-5.868	91.345	-11.462	51.014	11.626	57.034	-28.2009	31.0264	18.3524	22.5657	-24.1105	80.924	29.302	115.233	-24.752
255	18.4321	28.4807	11.284	87.048	-51.804	113.994	-1.711	101.807	39.822	64.971	-118.053	222.173	-20.066	98.583	-103.158	73.4	33.766	63.836	-17.418	51.083	-29.574	40.949	17.687	126.258	-57.078	13.027	-67.118	57.134	14.376	124.269	-6.378	52.071	6.825	59.149	-7.397	89.687	-14.657	50.287	14.316	62.392	-28.6468	31.6999	17.2764	24.8475	-25.2002	81.0219	29.6296	116.523	-23.3711
256	16.5643	24.1332	11.284	88.66	-51.358	113.909	-0.762	102.227	40.569	64.854	-119.008	224.453	-23.748	97.969	-105.324	75.185	33.68	61.073	-17.622	49.986	-29.574	38.674	12.788	125.09	-57.082	15.037	-67.088	57.15	13.975	123.907	-6.711	51.823	9.099	61.424	-7.541	89.538	-15.872	50.872	11.184	56.669	-29.7957	31.5679	17.0875	25.3253	-25.9691	81.1925	30.3235	116.423	-21.4669
257	18.6345	25.8713	12.896	88.66	-51.894	113.173	-0.845	102.129	40.961	64.118	-121.608	229.583	-21.184	99.594	-104.619	76.867	34.613	59.847	-15.489	50.867	-29.574	38.674	14.703	123.808	-58.22	12.855	-66.901	57.716	14.297	125.562	-7.09	52.024	9.099	61.424	-7.659	89.851	-17.037	50.854	8.064	52.739	-29.1109	30.9332	16.1684	24.5268	-27.4683	83.5107	31.8864	115.006	-23.4234
258	18.2842	27.6526	11.284	90.272	-52.668	113.728	-0.083	102.398	41.008	65.98	-124.983	232.136	-22.6	98.746	-104.562	78.037	35.622	60.041	-12.82	54.358	-29.574	38.674	16.059	124.643	-57.954	12.448	-67.04	57.255	13.456	123.65	-7.807	50.401	6.825	61.424	-8.909	88.534	-16.828	49.814	10.141	55.21	-29.6455	33.6108	17.5585	24.1992	-26.5652	83.2354	31.7772	116.471	-21.4396
259	18.7528	25.5983	9.672	93.496	-54.626	115.58	-0.874	102.226	40.577	66.029	-127.45	233.157	-27.258	100.078	-106	76.495	35.221	61.106	-11.828	53.082	-29.574	38.674	12.999	121.872	-61.171	9.308	-67.126	57.864	13.715	124.389	-7.822	51.096	9.099	61.424	-8.402	89.092	-16.818	50.326	7.283	51.618	-29.4726	31.5292	18.2137	21.0324	-26.3945	84.0704	31.9547	117.449	-21.6239
260	18.473	26.0123	9.672	91.884	-55.128	117.043	-1.241	103.518	39.726	66.161	-129.165	234.945	-27.883	100.108	-103.977	78.207	34.907	66.204	-9.026	58.881	-29.574	38.674	14.085	123.609	-56.218	11.607	-67.322	57.242	13.679	126.588	-7.825	50.346	9.099	61.424	-8.746	88.517	-16.739	49.52	8.339	51.963	-29.9617	32.7964	17.8519	22.6749	-26.9178	83.3378	31.9092	117.031	-19.7925
261	14.8876	23.1367	9.672	93.496	-55.473	116.372	-1.803	104.031	37.113	64.336	-130.325	237.733	-20.823	105.021	-103.683	80.447	34.443	66.078	-9.352	54.572	-29.574	38.674	14.657	122.084	-57.502	10.029	-67.182	57.205	13.402	126.382	-6.779	50.475	9.099	61.424	-9.619	89.413	-16.336	48.499	8.263	49.892	-29.3748	33.5722	18.473	21.6466	-26.3627	84.1363	32.4074	118.036	-20.4636
262	16.835	26.6721	9.672	90.272	-56.354	116.186	-1.422	104.874	37	63.269	-132.987	239.596	-20.282	103.791	-102.844	79.118	32.247	65.162	-8.846	54.258	-29.574	40.949	11.479	122.189	-59.045	6.964	-68.417	57.325	13.324	127.444	-6.949	50.052	9.099	61.424	-9.344	90.278	-18.044	48.082	8.03	50.584	-31.3358	32.9784	19.7447	23.9489	-25.7439	84.4708	32.9102	117.158	-23.2369
263	16.6439	25.6666	11.284	93.496	-57.249	115.269	-1.704	105.709	33.988	63.887	-134.755	242.573	-28.237	103.921	-102.566	80.324	30.68	62.458	-7.775	59.135	-29.574	40.949	10.409	121.577	-61.105	6.994	-68.073	57.797	12.725	128.077	-6.623	49.937	6.825	61.424	-9.949	91.064	-18.927	47.025	10.486	53.111	-30.9445	34.7188	18.6118	22.5634	-24.4267	84.8962	33.9999	117.752	-21.9742
264	18.3297	31.6885	9.672	93.496	-58.562	115.454	-3.219	106.812	32.615	63.812	-135.817	243.376	-26.748	101.922	-103.006	82.486	30.016	61.622	-10.988	78.545	-31.849	40.949	8.407	120.79	-62.703	6.159	-68.302	57.729	12.403	128.967	-6.708	49.3	9.099	63.699	-9.961	91.48	-19.852	44.746	7.824	51.37	-30.1665	33.8315	18.068	24.8225	-22.998	85.4126	34.1023	119.171	-22.4292
265	16.5734	25.6302	9.672	93.496	-59.917	116.738	-2.85	107.27	32.236	65.826	-136.908	243.416	-30.407	103.468	-104.524	81.383	29.855	60.382	-10.235	74.875	-31.849	40.949	11.103	120.228	-63.382	4.364	-68.478	58.179	13.045	130.472	-7.418	50.099	9.099	61.424	-10.526	93.538	-21.91	43.822	10.351	50.972	-31.1015	34.9599	21.2485	24.9476	-22.6818	83.4038	34.8803	117.238	-23.1322
266	17.356	30.2257	9.672	93.496	-59.982	116.227	-3.04	107.174	28.786	64.834	-136.583	246.089	-32.986	102.442	-103.647	77.658	32.068	60.682	-8.196	71.695	-31.849	43.224	9.914	121.425	-62.608	3.622	-68.031	58.642	14.16	129.9	-7.213	49.11	9.099	63.699	-11.078	93.443	-24.067	43.549	9.426	48.853	-31.3814	32.6553	19.474	24.3243	-21.4328	83.8042	35.6493	117.026	-22.32
267	17.1285	28.0917	9.672	93.496	-60.269	115.359	-7.536	108.468	27.325	65.464	-134.656	248.52	-36.064	102.185	-104.245	79.94	32.121	60.694	-10.29	76.943	-29.574	43.224	9.814	121.552	-61.423	5.323	-68.014	58.219	14.988	130.32	-6.273	48.517	9.099	63.699	-12.403	93.718	-25.515	42.585	8.76	47.75	-31.8818	34.7028	21.1211	25.0637	-18.7255	84.3206	36.5251	117.713	-22.8888
268	17.1854	27.1407	8.06	96.72	-60.139	115.017	-10.198	110.616	27.964	63.625	-134.612	249.391	-30.607	103.321	-103.734	82.039	31.441	59.998	-8.632	75.111	-27.299	43.224	8.475	121.81	-63.381	3.666	-68.111	58.347	15.52	131.939	-6.173	48.046	9.099	61.424	-11.853	93.959	-25.404	43.308	9.398	47.297	-32.5257	31.5793	19.8221	26.6857	-18.8302	84.903	36.7572	116.928	-23.437
269	16.3049	27.0111	9.672	96.72	-59.548	115.134	-13.447	110.941	28.463	63.449	-134.073	250.315	-27.45	104.863	-103.132	83.882	30.56	58.376	-9.97	77.078	-27.299	43.224	7.202	124.458	-64.889	3.556	-67.939	59.242	15.9	132.759	-6.728	48.551	9.099	61.424	-12.682	95.192	-27.343	44.225	6.711	48.029	-31.5201	33.5085	20.2407	25.9168	-18.771	86.4273	36.4114	116.275	-23.999
270	15.2607	27.3182	8.06	95.108	-59.153	115.086	-16.498	110.722	29.362	63.926	-134.627	252.036	-19.318	107.06	-102.923	83.161	29.604	57.74	-9.615	75.022	-27.299	40.949	6.098	125.507	-64.887	3.607	-68.089	58.763	16.515	131.47	-6.112	47.628	9.099	61.424	-12.84	94.125	-27.674	43.186	6.223	49.08	-31.9251	33.1467	20.0974	25.4436	-19.8039	87.7581	37.3236	116.86	-23.0162
271	15.7999	26.0647	6.448	96.72	-59.293	114.74	-21.062	110.169	28.44	65.93	-135.06	252.585	-27.232	104.32	-102.541	81.1	30.198	58.417	-8.392	75.826	-27.299	40.949	2.558	126.954	-65.778	2.69	-68.026	59.141	15.833	132.025	-7.575	47.12	9.099	61.424	-13.454	94.78	-28.816	42.426	11.027	47.203	-31.9774	33.0103	19.1191	24.8862	-18.655	88.6408	37.0643	116.594	-22.1016
272	18.059	28.6923	8.06	98.332	-58.264	114.618	-26.02	110.471	30.079	65.66	-136.64	254.418	-34.054	102.041	-101.382	82.342	29.3	57.927	-8.583	79.171	-27.299	40.949	0.567	128.326	-66.761	1.972	-67.685	59.093	15.437	131.909	-7.394	46.799	6.825	63.699	-13.737	94.531	-29.135	41.379	8.227	46.552	-33.7382	32.826	18.8074	29.7251	-19.8198	87.4487	37.8128	114.924	-23.2937
273	16.7281	29.823	8.06	96.72	-58.591	114.358	-28.863	111.556	31.343	64.647	-138.562	256.942	3.707	113.333	-101.723	83.72	29.632	60.049	-6.686	76.356	-25.024	40.949	-1.753	129.352	-67.486	2.749	-67.149	58.607	14.328	130.968	-7.44	46.242	6.825	61.424	-13.339	94.238	-29.427	41.315	8.559	45.021	-33.2195	32.2549	20.0655	27.3933	-20.45	87.5147	37.2986	116.136	-22.0857
274	17.8224	27.234	6.448	99.944	-59.928	114.396	-32.613	112.432	29.999	64.5	-140.596	256.734	1.55	103.521	-101.412	84.374	29.726	59.067	-9.021	78.623	-25.024	40.949	-2.027	131.549	-66.186	2.561	-66.162	58.398	14.391	131.527	-7.125	46.011	6.825	61.424	-13.555	93.529	-30.631	40.931	6.421	46.763	-33.7291	34.2638	19.6469	25.2024	-18.8165	88.2586	38.2587	115.784	-22.2017
275	15.6179	28.0166	6.448	96.72	-60.789	114.197	-34.302	112.118	29.349	62.794	-142.507	256.315	-5.915	104.774	-103.519	83.759	28.011	58.2	-7.487	76.565	-25.024	40.949	-2.314	131.241	-65.817	1.639	-66.329	58.229	14.88	132.178	-7.322	45.847	6.825	61.424	-14.148	94.284	-31.125	40.059	6.643	47.73	-31.8386	33.4698	19.2124	25.4049	-19.5013	90.1765	38.3406	114.947	-23.0617
276	16.8646	26.5629	6.448	98.332	-60.853	115.289	-35.015	111.039	31.836	63.807	-146.781	255.755	-4.704	108.41	-101.897	83.959	28.109	56.692	-6.939	77.659	-27.299	43.224	-0.512	135.269	-67.191	1.701	-65.911	58.753	15.292	133.103	-7.083	47.172	6.825	61.424	-14.242	95.426	-30.97	39.525	6.652	45.613	-31.6271	33.786	19.2806	25.8508	-20.3089	89.6668	38.4384	116.371	-21.1348
277	16.2549	24.4312	4.836	99.944	-59.313	114.329	-36.907	109.291	32.885	65.334	-151.682	254.352	-6.517	105.831	-98.85	84.903	28.064	55.946	-7.512	78.844	-29.574	40.949	-0.77	135.824	-66.597	0.022	-66.185	57.847	16.281	131.948	-7.359	46.426	6.825	63.699	-15.539	98.615	-32.292	39.73	5.875	44.45	-30.5305	31.8227	19.515	27.5684	-18.2182	91.8054	38.3702	113.72	-19.5172
278	18.3797	28.69	6.448	99.944	-59.465	115.469	-40.119	110.115	33.784	69.161	-156.05	256.506	-7.565	105.329	-100.04	87.153	29.041	54.832	-5.434	78.29	-29.574	38.674	-4.653	136.773	-66.077	-0.128	-66.721	58.186	17.468	130.753	-7.049	46.179	4.55	63.699	-15.861	98.965	-33.003	39.552	5.781	42.33	-31.6453	31.2153	19.6537	27.2136	-19.888	91.3162	37.5443	116.255	-19.4194
279	19.6105	30.9559	6.448	98.332	-59.063	114.91	-43.432	112.306	33.339	70.981	-157.304	256.778	-8.039	103.892	-99.679	89.21	30.665	54.046	-4.672	80.25	-29.574	38.674	-5.233	138.171	-66.526	-1.099	-66.716	58.382	18.554	131.201	-7.561	45.935	6.825	61.424	-17.363	101.156	-34.659	39.367	6.654	40.918	-31.7363	30.0687	18.9257	29.5227	-18.8347	93.5139	38.1859	115.989	-18.7119
280	14.9763	27.7482	6.448	98.332	-59.246	115.073	-42.773	113.054	33.621	70.655	-161.307	260.013	-9.71	103.393	-97.301	89.371	30.905	53.209	-2.49	82.952	-29.574	38.674	-5.871	143.22	-66.13	-1.425	-66.568	57.833	18.658	131.077	-7.769	45.235	4.55	63.699	-18.443	101.138	-34.929	39.092	6.601	37.711	-30.328	29.1041	17.8064	29.757	-18.9621	92.8723	39.0299	115.622	-19.5081
281	16.4528	30.4349	8.06	98.332	-59.537	114.53	-43.921	112.391	34.201	70.523	-164.948	263.277	-11.129	103.323	-99.23	94.92	30.988	53.154	-1.908	83.279	-29.574	38.674	-6.389	143.169	-66.339	-0.063	-67.02	58.335	17.836	131.044	-7.789	45.44	4.55	63.699	-18.504	102.53	-36.174	38.826	8.205	36.988	-31.2562	29.4476	19.2715	31.7954	-18.4753	93.1635	38.8342	116.485	-19.838
282	19.4444	26.9974	8.06	96.72	-60.201	115.576	-45.409	112.239	35.272	70.232	-168.734	264.14	-10.636	103.184	-98.538	96.054	31.975	52.857	-1.676	85.751	-29.574	38.674	-5.964	142.72	-65.225	-0.138	-67.088	58.208	19.092	129.982	-6.939	45.029	2.275	63.699	-18.978	103.438	-36.298	38.404	10.476	40.119	-31.7203	28.665	18.9303	29.9185	-19.6924	91.5619	38.8775	115.62	-19.2601
283	19.3694	29.7889	8.06	98.332	-60.535	117.141	-49.009	111.334	35.701	71.017	-172.982	265.202	-11.98	104.488	-99.787	96.966	32.296	52.245	-2.599	86.555	-29.574	36.4	-2.35	141.9	-64.306	-1.301	-67.141	57.652	19.389	130.743	-7.302	45.564	4.55	61.424	-20.187	104.683	-35.695	39.115	10.217	38.105	-30.9764	26.713	18.0999	28.4352	-19.8903	91.8986	39.3734	115.145	-18.3433
284	19.292	27.7072	8.06	99.944	-61.283	118.135	-54.74	110.534	34.327	72.651	-177.319	263.374	-13.449	102.733	-98.793	99.548	32.797	55.593	0.35	86.733	-31.849	36.4	-1.735	143.742	-63.583	-2.091	-67.33	57.181	20.35	131.808	-7.933	45.576	4.55	63.699	-20.989	104.793	-35.388	38.866	11.151	37.207	-32.305	29.691	17.4788	30.8809	-17.8383	93.912	38.998	113.8	-17.8587
285	23.7692	33.0808	8.06	96.72	-60.634	117.46	-54.223	109.831	34.247	72.513	-179.658	263.22	-13.974	105.331	-96.002	99.627	32.812	57.838	0.522	88.401	-31.849	36.4	0.503	142.986	-63.077	-2.61	-67.126	57.08	21.491	132.339	-7.213	45.5	2.275	63.699	-20.797	105.525	-36.642	38.902	11.169	38.328	-32.5302	28.897	19.0577	31.8568	-19.7788	93.8756	39.5759	115.047	-16.719
286	18.9075	28.8925	8.06	96.72	-59.445	117.184	-54.332	110.908	34.069	69.516	-181.601	260.985	-13.002	104.922	-96.74	99.787	32.457	58.11	3.5	89.192	-31.849	36.4	1.675	143.33	-61.846	-1.894	-67.129	57.852	20.45	133.386	-8.052	45.583	2.275	63.699	-21.67	105.46	-36.664	38.42	11.971	37.835	-33.3515	27.1453	18.7528	28.7514	-19.995	92.9929	39.2711	115.832	-14.6669
287	20.0336	27.796	8.06	96.72	-60.72	120.976	-54.319	110.985	30.797	67.935	-183.764	265.895	-12.712	105.926	-95.035	101.237	34.166	60.013	3.819	89.991	-31.849	34.125	1.593	145.033	-61.849	-2.079	-67.509	58.375	21.596	134.479	-8.232	46.136	2.275	63.699	-22.333	106.654	-36.484	38.216	12.326	37.854	-31.7271	29.1564	18.3957	32.3414	-19.8562	93.7209	39.1709	114.116	-15.9705
288	25.2502	33.1581	8.06	98.332	-61.189	125.56	-58.674	109.25	27.987	67.745	-190.827	273.828	-16.089	106.612	-94.568	99.171	34.462	59.487	5.788	91.087	-31.849	34.125	1.041	144.039	-61.112	-1.504	-67.813	58.765	21.311	133.965	-8.389	45.353	2.275	63.699	-23.89	105.977	-37.618	38.55	13.558	37.439	-33.3515	30.0072	19.3739	32.7918	-19.0417	94.3738	39.9513	116.116	-17.9907
289	21.2417	28.0781	8.06	96.72	-60.587	126.367	-60.152	109.564	28.217	64.858	-196.184	278.097	-11.848	107.365	-95.336	99.668	34.581	58.262	6.593	92.747	-34.124	34.125	4.439	146.009	-60.666	-1.969	-68.613	59.325	22.604	134.67	-8.934	46.145	2.275	65.974	-25.624	103.446	-38.364	39.124	13.172	35.506	-32.7873	29.6273	19.747	32.5598	-19.5559	95.4021	40.4336	114.801	-11.8391
290	25.5733	34.2592	9.672	96.72	-60.8	128.79	-60.812	110.026	30.067	64.869	-198.652	281.885	-12.883	108.63	-94.65	102.298	34.775	57.043	7.938	94.713	-34.124	36.4	4.288	146.749	-60.539	-2.733	-68.651	59.746	21.783	135.189	-9.111	45.827	2.275	63.699	-27.546	102.523	-38.913	40.076	12.261	35.958	-32.3778	27.7459	19.9654	33.8406	-19.3739	94.6787	40.3335	116.134	-16.041
291	26.3309	34.0795	9.672	96.72	-61.883	129.495	-62.599	109.629	30.692	66.089	-199.319	283.621	-10.801	107.794	-95.17	100.732	36.277	56.922	7.506	95.076	-34.124	36.4	3.93	147.369	-60.212	-1.353	-68.573	60.202	22.745	134.853	-9.284	45.451	2.275	63.699	-30.392	101.812	-38.777	40.369	14.442	36.549	-32.0366	27.8847	18.6254	36.4182	-19.5604	95.1928	40.4267	115.816	-13.8275
292	37.2418	43.9553	8.06	96.72	-61.843	131.052	-61.007	110.318	33.434	67.358	-200.524	283.919	-11.574	107.877	-94.624	101.346	36.629	56.336	9.831	94.265	-36.399	36.4	6.83	148.153	-59.434	-0.472	-68.963	61.692	21.571	135.648	-9.894	45.413	2.275	63.699	-32.187	102.408	-39.91	41.797	13.264	35.101	-33.2218	27.1225	18.8234	34.7006	-20.4295	94.9289	40.5337	115.713	-16.2162
293	30.6056	37.2918	9.672	95.108	-62.766	132.218	-59.155	112.077	35.262	69.287	-202.569	283.308	-13.728	109.095	-94.078	100.328	36.478	55.654	10.037	93.406	-36.399	34.125	9.655	149.816	-59.337	0.181	-69.311	62.18	22.611	135.567	-10.071	46.039	2.275	65.974	-32.568	102.922	-39.854	41.948	12.782	33.899	-34.1682	27.6481	18.2887	37.0188	-21.2394	94.3351	40.8522	115.06	-17.3947
294	30.2416	40.0491	9.672	95.108	-63.202	132.752	-59.639	111.739	34.56	69.46	-204.981	282.623	-12.598	112.098	-94.764	101.305	35.451	54.715	12.944	93.114	-38.674	36.4	9.132	149.627	-59.058	1.028	-68.735	62.569	22.798	136.346	-8.761	46.723	0	65.974	-33.527	102.147	-39.772	41.735	12.075	33.029	-34.8166	26.8336	18.564	35.2193	-20.7844	95.2725	41.2412	116.014	-13.4407
295	30.4805	39.0162	9.672	95.108	-63.984	132.771	-61.77	110.07	35.483	70.156	-208.565	281.65	-15.11	111.177	-95.366	102.925	38.675	56.373	13.702	93.458	-38.674	34.125	10.061	149.853	-59.134	0.886	-68.246	62.103	23.986	137.076	-9.603	45.506	2.275	65.974	-35.258	101.046	-40.418	41.649	11.797	33.624	-33.8201	26.5083	19.3148	34.8576	-21.7467	95.782	41.4073	115.233	-17.3446
296	31.2812	40.2402	9.672	95.108	-65.437	132.961	-67.024	108.074	34.784	71.5	-213.11	277.088	-13.627	113.517	-97.295	103.609	35.699	59.231	15.986	95.819	-40.949	36.4	11.352	149.366	-59.229	0.773	-68.769	63.05	23.563	135.996	-9.217	45.347	2.275	65.974	-34.501	101.627	-39.678	42.825	11.673	33.186	-33.852	26.5219	18.6982	36.334	-21.2326	95.368	41.3618	116.25	-15.3199
297	32.3732	41.1297	9.672	95.108	-66.061	132.836	-69.673	107.179	35.342	73.076	-217.687	275.487	-14.162	114.129	-97.081	102.823	32.741	59.103	16.923	97.188	-40.949	34.125	11.804	150.373	-58.748	1.264	-68.705	62.839	24.294	136.379	-9.342	44.439	2.275	63.699	-35.79	100.587	-40.475	41.728	10.169	32.385	-33.0466	23.7919	18.3888	36.6457	-20.5478	97.3404	42.2149	116.121	-17.2832
298	29.277	39.0049	9.672	96.72	-66.834	132.69	-70.752	106.698	36.162	73.741	-222.662	274.665	-16.009	113.976	-97.255	104.616	31.774	57.24	17.529	98.041	-40.949	34.125	11.653	149.438	-58.207	3.199	-68.086	63.528	25.457	136.339	-9.142	44.986	0	65.974	-36.371	100.211	-40.043	41.279	10.108	35.24	-33.4948	23.1845	17.0216	37.037	-22.4793	96.2621	43.3456	115.841	-15.8454
299	31.461	41.9351	11.284	95.108	-68.863	132.619	-70.019	106.677	37.044	74.292	-225.131	275.828	-15.251	114.155	-96.973	107.584	31.886	57.398	20.308	96.355	-40.949	36.4	9.834	150.916	-57.82	4.156	-67.878	63.964	26.037	137.778	-9.105	45.02	0	65.974	-37.687	100.49	-40.844	41.595	10.284	33.427	-34.4412	23.5053	15.5451	38.6841	-22.1562	95.7115	42.0579	112.481	-16.5802
300	28.5512	36.0178	9.672	96.72	-70.03	134.514	-70.492	106.115	37.283	74.378	-227.565	276.684	-14.081	115.283	-95.682	103.307	31.748	57.436	22.262	95.963	-40.949	36.4	8.76	151.032	-57.998	5.304	-67.488	62.809	26.694	137.451	-7.914	44.737	0	65.974	-37.934	99.921	-40.166	40.978	7.386	30.211	-35.5309	21.3736	15.7885	37.087	-21.8855	97.734	44.8243	114.307	-17.9475
301	32.7077	44.7083	9.672	96.72	-70.769	134.929	-70.333	104.415	37.282	73.684	-229.584	275.693	-15.241	114.594	-94.548	103.238	31.46	56.815	23.296	99.8	-40.949	36.4	8.412	151.58	-56.94	5.338	-67.561	62.8	26.174	136.298	-8.078	44.976	2.275	68.249	-37.751	98.929	-39.484	41.906	7.562	31.289	-34.8257	20.4181	14.1255	37.7741	-22.1972	97.4997	45.0951	114.783	-17.017
302	30.5169	37.2122	9.672	96.72	-70.67	134.014	-71.198	103.34	37.266	72.435	-230.164	276.022	-16.751	114.887	-94.197	104.506	31.091	57.413	23.971	103.659	-40.949	36.4	9.551	151.698	-57.353	5.612	-67.62	63.21	26.539	136.103	-7.946	45.231	2.275	65.974	-38.301	99.196	-40.556	42.325	7.897	29.248	-35.3967	21.658	14.9991	37.7468	-22.2791	97.7704	44.7493	109.377	-16.678
303	32.5302	42.7017	9.672	95.108	-71.313	134.777	-72.618	103.271	36.916	73.042	-231.876	276.002	-15.429	116.676	-97.477	106.509	32.774	58.67	24.21	105.98	-40.949	38.674	10.872	153.343	-58.888	4.79	-67.42	63.646	27.33	135.639	-7.259	45.155	2.275	65.974	-37.655	98.443	-38.66	43.515	9.04	31.01	-36.4569	20.3567	13.8115	37.6285	-23.5212	96.6852	44.6696	108.722	-19.1464
304	35.9996	44.1532	9.672	96.72	-72.122	135.184	-73.089	103.627	35.787	73.973	-235.768	275.715	-14.821	115.808	-95.911	105.46	35.163	58.954	23.316	107.483	-40.949	38.674	11.652	156.784	-58.579	4.14	-67.005	63.324	27.547	135.17	-7.206	44.855	2.275	65.974	-37.036	98.367	-37.194	43.285	7.26	30.038	-35.9928	19.9859	11.9574	37.9652	-23.0571	97.5156	44.2943	110.196	-18.8211
305	36.2999	46.3281	11.284	96.72	-72.13	133.232	-72.4	102.797	36.446	74.427	-235.553	276.958	-16.286	116.389	-96.776	106.995	36.185	58.759	23.315	108.618	-40.949	38.674	12.143	157.719	-58.867	7.105	-67.178	64.25	26.342	135.694	-7.941	46.52	0	68.249	-36.473	98.916	-34.937	44.122	7.427	29.39	-37.3032	19.2579	11.648	36.011	-24.2288	97.5611	42.8769	107.978	-15.4473
306	36.2453	46.0051	11.284	96.72	-73.178	133.867	-72.737	103.21	35.724	74.694	-234.538	278.817	-15.403	116.275	-97.083	103.079	35.18	57.917	24.341	108.68	-40.949	40.949	13.646	157.034	-58.36	6.731	-66.657	64.123	25.166	133.883	-7.88	45.747	0	65.974	-37.189	100.154	-34.645	43.197	6.972	30.675	-36.7822	18.5685	12.4215	38.7569	-24.6746	97.866	44.6082	105.965	-20.1201
307	35.0305	44.8243	9.672	95.108	-73.47	136.074	-74.223	102.813	35.321	75.796	-234.744	285.397	-14.072	115.037	-96.704	104.873	33.274	57.977	22.805	109.299	-40.949	43.224	14.036	158.953	-59.229	6.469	-67.249	64.872	24.195	134.748	-8.86	47.107	2.275	65.974	-36.367	99.817	-34.343	43.382	5.778	31.86	-38.0061	19.4262	12.4534	41.0092	-24.6473	99.3629	44.3853	106.151	-19.6969
308	35.0259	47.1698	11.284	96.72	-74.491	136.993	-75.133	101.533	34.785	75.409	-233.683	290.516	-13.579	114.99	-96.609	104.024	31.974	57.211	21.968	111.214	-40.949	43.224	12.429	160.975	-58.124	7.478	-67.552	64.519	23.589	133.052	-9.177	47.318	2.275	65.974	-36.367	100.453	-33.592	44.151	4.699	31.035	-36.8459	19.9836	11.0838	39.0868	-26.0965	96.0277	44.4945	105.838	-20.723
309	36.8641	49.2947	11.284	95.108	-74.452	137.732	-79.038	101.584	33.838	75.375	-232.582	296.768	-14.001	116.912	-96.041	108.892	31.454	57.485	23.263	111.596	-45.499	43.224	12.695	158.992	-58.126	7.83	-67.196	66.012	22.998	133.507	-10.174	47.989	0	68.249	-35.902	100.786	-34.028	43.212	4.915	31.109	-37.3851	19.7584	12.0416	38.7478	-24.7566	98.3869	44.1031	105.348	-21.2599
310	36.7822	48.3165	9.672	98.332	-74.079	137.992	-80.178	103.434	32.834	76.111	-232.198	301.388	-13.809	116.213	-94.647	108.447	30.77	57.487	23.434	111.989	-45.499	40.949	12.402	159.128	-58.808	9.213	-66.951	65.604	22.582	133.129	-9.616	49.148	0	65.974	-36.326	102.201	-34.013	44.878	3.983	32.167	-35.556	19.9335	13.1177	40.8613	-25.0045	97.5816	43.0498	103.699	-19.9518
311	36.425	48.2982	9.672	96.72	-74.177	138.319	-80.524	103.583	32.154	78.182	-232.848	304.974	-11.876	115.606	-98.432	106.626	31.525	57.43	24.474	112.972	-43.224	38.674	12.147	158.156	-60.138	9.897	-66.429	66.275	21.414	135.917	-10.451	48.917	0	65.974	-35.879	101.456	-32.475	45.561	3.479	31.057	-34.7893	19.7584	14.1278	41.1206	-25.5255	97.0652	43.4366	102.527	-18.0157
312	35.0964	47.2791	9.672	96.72	-73.331	139.498	-81.8	103.677	32.326	79.055	-231.83	308.208	-11.836	118.129	-97.22	108.507	30.729	57.682	22.686	114.176	-45.499	38.674	13.31	160.356	-59.316	9.264	-66.699	65.758	21.175	135.466	-9.804	49.344	0	65.974	-36.07	101.869	-33.315	47.458	3.833	33.819	-34.944	19.1873	13.418	41.0456	-25.0227	97.9319	43.928	102.059	-13.741
313	36.1247	48.4461	8.06	95.108	-73.775	139.978	-82.912	103.557	31.432	78.454	-230.1	311.458	-14.559	116.765	-96.121	108.623	30.481	57.536	24.485	115.19	-45.499	38.674	11.487	159.982	-59.564	8.883	-66.182	65.051	19.327	134.182	-10.169	49.1	-2.275	65.974	-36.254	102.307	-33.202	48.111	3.301	32.373	-34.1022	19.5036	12.6058	39.8921	-26.0396	98.1412	42.7495	102.441	-16.8623
314	36.6025	47.1698	9.672	95.108	-71.881	141.765	-81.509	103.596	32.727	81.049	-230.398	314.585	-12.068	117.771	-96.437	109.391	30.1	58.638	25.906	117.757	-43.224	36.4	10.124	160.699	-59.468	8.138	-66.031	65.875	19.902	134.564	-10.598	49.476	0	65.974	-37.627	102.23	-35.776	49.963	2.571	33.998	-34.6482	19.6651	12.9948	38.3679	-27.118	96.7307	43.2227	103.72	-16.1934
315	36.3568	48.255	9.672	95.108	-71.869	142.888	-82.768	103.9	31.525	82.292	-230.868	317.067	-12.58	116.569	-95.763	109.593	32.639	60.258	28.295	119.531	-43.224	36.4	5.713	162.65	-59.44	8.819	-65.923	64.725	20.9	135.322	-10.71	48.685	-2.275	65.974	-37.657	102.693	-34.58	52.95	3.242	34.442	-34.241	18.7642	13.8366	39.1391	-28.3442	96.3758	43.6231	101.827	-12.4761
316	35.4991	49.6018	9.672	95.108	-70.882	144.076	-81.409	103.566	31.453	83.687	-232.042	318.658	-12.291	117.683	-97.017	112.009	33.415	58.239	27.877	117.7	-43.224	36.4	4.952	162.246	-57.767	9.085	-66.192	64.646	20.019	133.956	-11.603	49.114	-2.275	65.974	-39.64	102.14	-34.293	54.192	3.04	37.608	-35.151	17.745	13.9389	38.9662	-29.0131	98.1662	44.8357	106.563	-13.9048
317	39.9376	48.2664	8.06	95.108	-71.934	143.123	-82.582	103.265	30.248	84.254	-232.298	320.131	-11.586	118.299	-99.683	107.897	35.752	57.612	28.189	116.987	-43.224	36.4	4.083	163.195	-58.23	9.404	-65.577	63.9	20.171	132.438	-12.652	49.348	0	65.974	-40.178	102.44	-35.351	53.84	3.428	35.885	-34.7643	19.0759	15.9523	39.2847	-30.5123	98.1981	45.3908	103.731	-14.2961
318	35.2853	44.3693	9.672	95.108	-71.841	143.32	-82.929	102.28	29.014	83.777	-233.596	322.767	-12.039	117.418	-97.227	108.408	35.155	56.927	28.697	119.577	-43.224	34.125	1.798	163.835	-59.896	10.755	-65.754	63.675	19.916	131.904	-13.681	49.059	0	65.974	-38.93	102.133	-34.928	54.915	3.039	37.234	-34.8849	19.2192	15.3449	37.9879	-31.0174	97.1448	43.6732	101.117	-14.4235
319	36.9301	47.3223	9.672	95.108	-72.21	143.643	-83.701	101.85	28.178	83.335	-232.968	325.032	-11.404	117.461	-97.685	111.313	36.949	57.904	29.413	119.375	-43.224	34.125	-0.465	163.81	-59.592	11.116	-65.578	62.881	19.507	130.632	-13.922	48.777	0	65.974	-38.144	102.495	-33.693	55.936	2.413	38.775	-34.8894	22.7614	14.9877	39.8353	-32.032	99.2992	46.5033	105.417	-14.4781
320	37.6126	44.5331	8.06	95.108	-70.614	146.003	-82.885	102.004	28.254	83.167	-230.712	326.761	-11.759	118.325	-97.545	106.956	38.913	58.668	29.146	117.991	-40.949	31.85	-0.304	164.33	-58.129	11.164	-65.57	62.004	19.926	130.167	-14.288	48.05	0	65.974	-38.498	101.718	-33.361	53.753	2.282	39.399	-35.9678	21.4692	15.3039	40.8363	-32.9784	96.0937	45.0723	105.355	-11.5297
321	37.8242	50.1114	9.672	95.108	-69.171	147.827	-82.907	102.227	27.237	85.27	-228.459	331.031	-13.155	119.593	-96.941	106.808	40.49	57.08	29.579	118.527	-40.949	31.85	-1.261	164.725	-59.096	12.648	-65.473	61.478	20.243	130.034	-14.393	48.917	0	65.974	-39.049	101.37	-33.984	52.972	2.112	36.828	-36.0133	22.9866	15.1197	38.2041	-32.4984	96.9946	44.4717	104.19	-15.8681
322	37.6467	48.2937	9.672	93.496	-69.361	148.206	-81.948	102.387	26.448	83.541	-227.858	333.171	-12.646	115.975	-96.606	107.989	40.198	56.645	29.393	117.684	-40.949	31.85	-1.485	162.297	-59.271	12.966	-65.211	61.144	20.561	129.835	-14.704	48.177	-2.275	65.974	-37.607	102.616	-34.027	54.876	0.526	38.69	-35.3672	23.9557	15.3062	37.7604	-33.1604	99.6541	42.3787	103.29	-17.3105
323	37.3782	48.5098	9.672	93.496	-68.171	148.352	-80.512	102.291	27.205	83.557	-227.461	334.462	-12.338	116.551	-96.123	107.334	39.815	56.174	30.262	114.406	-38.674	27.3	-3.842	163.726	-58.925	14.133	-65.336	61.341	20.436	129.718	-14.82	48.583	0	65.974	-37.487	102.925	-33.965	54.616	-1.899	40.716	-35.4581	25.5892	16.0206	39.6191	-33.8952	98.7282	42.6745	103.654	-16.6371
324	37.012	48.6213	9.672	93.496	-68.271	149.014	-78.968	102.795	28.066	84.181	-227.626	335.207	-12.838	119.026	-96.782	109.71	38.523	59.042	29.993	113.145	-38.674	29.575	-2.434	163.852	-57.674	14.115	-64.899	60.282	20.811	129.34	-15.38	48.394	0	65.974	-36.508	103.909	-32.965	55.365	-3.117	42.083	-36.2999	26.9792	16.0797	38.9093	-33.918	99.2446	42.3195	103.169	-14.2802
325	38.2996	49.8771	8.06	95.108	-69.227	149.125	-80.705	102.671	27.006	83.154	-227.477	335.468	-11.864	118.601	-97.61	109.505	37.475	60.348	30.482	112.316	-40.949	29.575	-5.671	163.086	-59.934	15.332	-64.924	60.242	20.592	131.852	-15.317	48.222	0	65.974	-37.625	103.769	-32.6	56.952	-2.809	40.293	-36.83	25.6028	15.7112	39.3348	-35.2397	99.1445	42.8838	105.332	-17.1717
326	37.5148	47.5043	8.06	95.108	-68.684	149.692	-80.914	102.959	26.221	82.556	-227.363	336.173	-13.508	118.535	-97.742	106.149	33.381	58.522	30.739	110.754	-40.949	27.3	-5.54	164.655	-58.038	13.459	-64.522	59.798	20.827	130.487	-15.785	47.25	0	65.974	-38.662	102.347	-32.411	57.795	-5.009	43.189	-38.3269	25.3389	15.4518	39.2074	-34.332	97.5611	42.5834	105.71	-16.3504
327	38.0562	46.6625	8.06	95.108	-67.112	152.593	-80.479	103.233	25.772	82.135	-227.142	336.032	-13.65	117.367	-98.092	108.156	31.686	57.826	29.242	111.057	-40.949	27.3	-7.084	165.466	-60.575	15.178	-64.562	59.342	21.423	129.424	-15.364	47.627	0	65.974	-39.155	102.752	-32.129	58.794	-4.474	43.327	-39.792	24.9158	14.5191	40.6497	-34.5686	98.4211	41.7485	105.128	-14.7784
328	38.4907	50.4026	9.672	91.884	-67.085	152.624	-78.858	103.392	25.455	80.376	-226.501	337.12	-7.964	119.942	-96.79	108.781	33.797	57.767	29.551	107.674	-38.674	25.025	-6.237	166.182	-56.519	16.455	-64.506	59.339	21.994	130.305	-14.867	47.747	0	68.249	-38.522	103.403	-31.292	57.395	-4.358	42.19	-39.1141	25.3071	14.1642	39.2005	-34.6096	97.8751	41.9601	105.014	-13.1358
329	36.921	45.1656	9.672	95.108	-64.756	154.778	-77.642	103.776	25.558	80.329	-224.54	340.388	-9.875	118.559	-98.738	110.147	34.927	58.573	32.113	105.029	-38.674	25.025	-8.034	166.978	-59.153	16.397	-64.855	60.433	22.629	130.114	-14.374	47.657	0	68.249	-38.836	103.751	-32.027	59.143	-5.196	43.732	-39.8876	24.8839	15.2061	39.3074	-35.9541	98.553	41.7804	104.837	-14.0094
330	36.7799	46.7922	9.672	95.108	-64.58	154.779	-77.39	103.702	25.977	79.081	-224.008	340.274	-9.579	116.845	-98.281	109.476	36.511	59.46	32.008	103.993	-38.674	25.025	-5.834	167.077	-60.416	18.237	-64.519	59.364	22.984	129.797	-15.271	47.652	-2.275	68.249	-41.769	102.965	-31.16	58.362	-6.608	46.708	-40.9864	24.4426	14.4394	40.1833	-36.1611	99.8702	43.1863	105.924	-13.2996
331	36.6776	46.617	11.284	93.496	-64.211	155.137	-75.741	104.433	26.661	77.944	-223.899	340.762	-11.86	117.899	-98.122	108.998	37.711	59.417	33.03	104.139	-36.399	22.75	-7.923	167.423	-59.223	17.936	-64.867	59.427	23.092	130.318	-15.431	46.393	-2.275	68.249	-40.577	102.503	-32.261	60.325	-5.312	44.311	-40.6611	25.753	13.7365	39.8444	-36.6366	99.918	41.5461	104.154	-12.4807
332	37.4601	47.8069	9.672	91.884	-64.233	155.733	-74.497	104.195	26.499	77.133	-222.98	343.544	-9.514	117.497	-98.535	106.704	37.648	59.573	32.366	103.55	-36.399	20.475	-9.274	169.248	-59.471	18.772	-64.587	60.165	23.525	130.906	-15.788	46.537	0	65.974	-41.981	102.907	-30.792	59.229	-7.087	46.363	-40.0445	26.4059	14.3735	39.2301	-36.4796	100.084	41.7394	102.73	-11.4251
333	37.7673	49.4426	9.672	90.272	-62.355	157.235	-73.357	105.136	27.026	78.872	-223.866	345.854	-10.29	118.849	-100.396	109.665	38.335	58.629	33.691	102.657	-36.399	18.2	-9.429	169.879	-60.236	16.168	-64.663	58.868	24.232	129.36	-15.878	44.653	0	65.974	-41.844	100.946	-30.652	60.392	-7.241	47.847	-40.0969	27.0907	15.2175	40.5701	-36.6047	99.0012	41.6575	101.513	-12.583
334	37.2463	46.7308	9.672	93.496	-61.622	156.893	-73.18	104.464	26.782	79.34	-223.878	348.759	-8.439	119.493	-98.474	107.383	38.727	59.209	33.728	101.788	-36.399	18.2	-10.403	169.408	-59.779	18.394	-64.357	58.073	24.047	129.46	-15.526	45.036	0	65.974	-41.463	102.074	-30.769	60.687	-7.886	45.889	-39.8989	25.8645	14.155	40.1924	-37.8924	98.6281	43.1568	102.268	-18.4684
335	38.5089	46.3099	9.672	91.884	-60.634	156.979	-72.333	105.086	28.071	79.79	-223.739	351.43	-9.818	118.666	-97.326	107.662	39.277	58.57	33.369	100.288	-36.399	15.925	-12.166	169.87	-60.377	17.958	-64.018	58.132	23.864	129.521	-15.754	45.506	0	65.974	-42.078	102.35	-31.518	61.521	-8.96	47.792	-39.2688	24.9749	12.6536	39.4144	-37.9811	99.6905	43.1226	101.624	-13.9162
336	37.7081	48.569	9.672	93.496	-61.077	156.291	-72.341	104.39	28.044	79.935	-222.373	355.95	-8.821	119.367	-97.932	109.779	39.563	58.245	31.342	99.849	-38.674	15.925	-12.262	169.985	-61.481	19.876	-64.354	58.218	23.245	130.154	-15.629	46.295	-2.275	65.974	-41.819	102.423	-31.005	62.805	-8.796	46.802	-39.8261	26.2808	14.2893	39.8739	-38.2746	100.553	43.4889	101.181	-16.7622
337	37.7559	47.3587	9.672	91.884	-59.32	156.139	-70.189	104.556	28.734	79.632	-222.595	359.359	-10.438	117.624	-97.799	108.289	39.322	58.397	32.706	99.161	-38.674	15.925	-13.145	172.142	-59.762	18.807	-63.972	58.15	23.102	131.054	-15.049	46.005	-2.275	65.974	-41.493	101.374	-29.954	64.143	-9.821	48.976	-37.5534	25.3412	15.3017	39.6828	-38.6636	97.9001	42.8519	102.239	-18.2592
338	38.3838	45.4136	9.672	90.272	-58.65	155.677	-68.497	104.697	27.547	78.585	-223.879	363.35	-11.292	117.367	-99.022	107.441	39.78	57.639	31.633	99.019	-38.674	18.2	-13.335	171.208	-60.426	18.932	-64.034	58.29	22.576	132.204	-14.76	46.855	-2.275	65.974	-41.683	102.546	-29.217	63.831	-10.162	42.545	-38.2041	24.5745	14.8262	39.3211	-38.7455	100.487	43.3297	102.794	-17.224
339	37.2827	44.929	11.284	90.272	-60.07	155.759	-67.554	104.893	28.8	79.417	-223.87	365.728	-9.705	117.972	-95.958	107.012	40.109	57.069	31.703	97.778	-38.674	15.925	-13.265	171.418	-59.852	18.419	-63.822	57.735	21.36	133.651	-14.304	45.737	-2.275	65.974	-42.878	101.662	-28.808	63.443	-9.917	47.109	-38.8365	24.7702	13.8366	38.1017	-39.0526	101.365	42.2854	100.393	-20.0951
340	38.3292	48.908	11.284	90.272	-59.741	157.114	-66.929	104.742	29.505	80.084	-224.164	367.576	-10.991	118.518	-96.424	108.942	40.423	57.264	30.813	98.144	-40.949	18.2	-13.945	172.415	-60.769	19.413	-64.135	58.1	21.897	134.011	-15.139	46.031	-2.275	65.974	-44.188	102.017	-28.628	63.594	-11.681	44.724	-37.6854	28.0803	12.7104	37.6467	-39.2642	99.6723	41.7508	100.391	-15.6952
341	37.9743	47.2631	11.284	90.272	-58.932	157.489	-64.94	105.803	29.192	79.45	-224.28	369.519	-10.541	118.281	-96.436	108.427	40.446	58.916	30.949	97.168	-40.949	15.925	-14.682	170.453	-60.548	19.9	-64.717	58.353	22.57	134.269	-14.781	45.615	-2.275	65.974	-43.978	102.062	-29.017	63.829	-11.139	44.525	-39.2893	25.3913	13.5112	38.0289	-39.8944	99.0854	41.6939	97.9865	-21.2712
342	37.4693	47.725	11.284	90.272	-59.068	158.668	-62.759	105.971	28.657	78.648	-224.719	372.103	-7.631	118.513	-96.555	109.074	40.718	58.945	31.845	96.096	-40.949	15.925	-15.112	170.435	-61.906	22.169	-64.561	59.131	23.244	133.898	-14.944	46.625	-2.275	68.249	-44.711	102.852	-29.388	65.113	-10.082	44.919	-39.4735	25.2684	14.833	36.375	-40.0969	99.5153	42.3082	100.309	-19.5445
343	39.5532	50.9418	11.284	90.272	-58.988	158.752	-61.419	106.462	28.885	77.68	-226.109	373.82	-10.511	117.785	-97.981	106.497	41.614	59.068	31.285	95.579	-40.949	13.65	-15.446	169.205	-61.808	21.393	-64.191	58.914	24.223	132.501	-14.553	45.81	-2.275	68.249	-43.009	102.39	-28.398	65.462	-11.289	44.699	-39.0572	25.8417	15.2016	36.7071	-40.7953	100.4	42.0124	98.9898	-19.7015
344	38.9253	48.205	11.284	90.272	-59.485	158.699	-60.446	106.976	27.333	77.086	-227.081	375.765	-7.99	118.477	-98.763	109.105	42.613	60.19	30.768	95.622	-40.949	13.65	-19.082	171.615	-61.206	23.587	-64.107	58.49	23.932	132.482	-15.615	46.325	-2.275	68.249	-43.715	101.803	-29.394	65.203	-11.583	44.549	-40.1833	26.2649	15.404	33.7951	-40.9432	101.918	43.9348	100.687	-21.8218
345	40.106	47.8933	11.284	90.272	-58.386	158.329	-58.886	108.032	26.372	76.311	-228.251	376.777	-7.756	116.453	-99.383	107.653	42.753	59.741	32.258	95.296	-40.949	18.2	-17.126	171.51	-62.046	23.271	-63.998	58.583	23.642	133.041	-14.957	46.393	-2.275	68.249	-43.85	101.388	-28.98	63.428	-13.792	42.826	-39.3825	26.1693	13.2974	35.4695	-40.5223	100.903	42.6745	98.0616	-17.9497
346	38.8502	52.8869	11.284	90.272	-57.613	158.373	-58.236	108.125	25.156	75.402	-229.218	376.704	-6.297	116.809	-95.029	108.496	43.384	61.947	32.452	95.152	-40.949	20.475	-17.235	169.615	-60.863	23.849	-63.396	58.186	24.659	132.166	-14.94	46.613	-2.275	68.249	-43.367	100.522	-30.133	63.905	-12.457	44.259	-38.3906	25.5346	16.1116	32.8442	-40.3949	103.051	41.3208	98.2254	-19.3056
347	39.9422	50.207	11.284	87.048	-56.681	157.964	-57.488	108.663	25.612	74.528	-230.516	376.341	-8.353	116.323	-96.811	105.161	43.836	62.191	31.691	95.509	-40.949	18.2	-17.364	169.21	-63.408	23.297	-63.682	57.836	24.16	132.477	-15.678	46.331	-2.275	68.249	-43.212	100.885	-30.102	62.625	-15.027	44.809	-38.0357	24.9772	13.9571	34.3957	-41.339	103.453	40.7908	97.3518	-18.7119
348	39.5486	52.896	9.672	90.272	-55.961	157.31	-57.738	108.561	24.025	74.243	-231.395	375.523	-6.59	117.624	-97.527	109.642	43.806	63.804	31.725	94.086	-43.224	18.2	-16.932	168.449	-64.529	25.571	-63.955	57.868	24.338	132.432	-15.237	46.46	-2.275	68.249	-43.383	100.817	-30.435	62.368	-14.492	45.129	-37.2713	25.8713	14.7124	34.6573	-41.1343	103.979	41.0137	98.7418	-19.7766
349	36.6798	47.8978	11.284	87.048	-54.318	157.483	-57.397	109.362	22.766	73.261	-236.354	372.859	-10.08	118.406	-97.221	107.622	43.987	64.951	31.312	93.259	-43.224	18.2	-21.543	164.624	-61.984	24.681	-63.65	58.051	24.654	133.682	-16.2	47.02	0	68.249	-43.272	101.947	-30.98	63.204	-12.774	45.995	-36.4136	28.8515	14.8649	35.0032	-40.3767	103.838	41.8372	101.181	-19.5764
350	38.8775	50.1365	11.284	88.66	-53.935	158.165	-56.612	109.341	21.353	72.7	-239.939	370.624	-13.126	118.083	-96.765	110.633	44.469	65.11	30.794	94.217	-43.224	15.925	-21.986	165.244	-63.239	26.097	-63.936	57.436	25.481	132.815	-16.966	46.522	0	68.249	-43.89	101.145	-31.724	62.643	-13.643	47.941	-35.7448	25.8576	14.1437	33.7951	-40.6133	104.525	40.5564	98.9716	-19.7265
351	40.0696	53.4397	11.284	87.048	-52.702	158.02	-57.176	109.243	20.96	73.3	-242.47	370.654	-12.471	114.961	-96.964	108.488	44.986	66.054	30.778	92.633	-40.949	13.65	-21.069	164.604	-63.015	23.724	-63.53	57.177	25.292	132.24	-17.131	47.088	-2.275	70.524	-44.536	101.604	-31.843	62.596	-15.461	49.557	-35.4741	27.5684	12.8788	35.2398	-40.7293	104.473	40.6452	99.9817	-19.7083
352	39.6396	49.686	12.896	87.048	-52.866	158.181	-57.409	108.938	20.098	75.435	-244.538	369.995	-14.132	115.959	-96.957	107.195	46.45	67.149	30.032	92.691	-40.949	11.375	-20.27	165.499	-63.622	24.579	-63.224	57.501	25.827	131.814	-16.766	47.663	-2.275	68.249	-43.516	101.114	-31.077	62.098	-15.699	51.887	-33.6654	29.1678	13.9503	35.7926	-41.3436	103.421	40.2789	99.3629	-20.6388
353	40.0036	50.9031	11.284	87.048	-52.554	158.39	-56.961	108.845	20.165	76.838	-246.673	368.052	-13.222	117.446	-98.827	110.793	45.886	68.773	30.539	91.93	-43.224	13.65	-22.284	165.916	-63.825	26.061	-63.168	56.297	26.149	131.311	-16.194	48.19	-2.275	70.524	-44.417	100.826	-31.622	61.915	-13.936	50.467	-33.4266	29.3998	12.1144	38.0062	-41.6006	101.834	39.4189	98.6576	-21.6853
354	38.3042	46.7103	12.896	87.048	-52.141	159.7	-57.327	108.187	20.314	77.09	-248.505	365.962	-12.356	117.568	-97.89	110.814	46.055	68.832	31.577	91.495	-40.949	11.375	-23.025	166.719	-64.415	28.629	-62.713	56.123	27.282	130.504	-16.526	49.285	-2.275	70.524	-44.838	100.825	-30.99	61.373	-14.994	51.792	-32.6485	28.5217	14.1755	36.0269	-41.2207	102.471	39.9718	100.689	-21.1871
355	37.8264	47.9593	12.896	83.824	-51.282	159.562	-56.589	108.087	20.851	76.327	-250.98	364.491	-9.721	116.538	-98.32	108.71	46.644	69.507	32.112	91.266	-40.949	11.375	-21.738	168.075	-64.933	25.86	-63.021	54.386	27.621	129.726	-16.399	49.409	-2.275	70.524	-46.358	101.07	-30.532	60.899	-13.6	50.565	-31.8909	28.4261	13.1814	36.1088	-43.3774	101.251	41.1001	100.76	-22.8114
356	38.5226	49.9294	12.896	88.66	-50.865	160.496	-56.902	107.641	20.703	77.037	-253.87	363.044	-10.324	117.127	-98.158	109.67	47.901	70.044	31.694	89.579	-43.224	15.925	-23.429	167.257	-63.546	26.412	-62.932	54.394	29.183	129.703	-16.935	49.634	-2.275	70.524	-45.168	101.164	-30.893	61.181	-13.707	50.651	-31.1539	30.642	13.3429	38.6068	-42.7996	99.8975	40.8863	102.268	-23.6099
357	37.0097	48.8943	12.896	87.048	-49.867	160.684	-56.648	107.579	19.97	79.236	-255.498	361.259	-9.956	117.291	-98.172	107.74	47.446	71.011	31.436	89.648	-43.224	13.65	-21.668	166.865	-63.707	27.244	-63.276	53.797	30.563	130.187	-16.496	50.247	-2.275	70.524	-44.46	101.203	-30.45	61.855	-12.396	52.444	-32.6644	31.4291	14.378	39.2392	-44.4853	99.3993	40.3904	101.581	-22.1721
358	38.6477	47.3314	11.284	85.436	-49.924	164.007	-56.047	107.808	19.802	80.894	-256.996	359.786	-15.649	117.761	-95.897	109.726	48.112	71.058	31.372	89.41	-43.224	13.65	-22.731	167.641	-65.297	28.725	-63.631	53.692	29.689	130.232	-17.618	51.078	-2.275	70.524	-46.235	102.185	-30.224	61.09	-12.835	52.686	-32.8715	31.8568	14.1391	38.9093	-45.8048	98.164	39.7124	101.818	-22.2677
359	38.2974	46.9856	11.284	85.436	-49.901	166.346	-55.459	108.518	19.8	83.635	-257.37	357.084	-14.556	114.547	-97.182	109.155	47.983	71.087	31.376	89.268	-43.224	15.925	-23.711	166.508	-62.579	26.99	-62.868	53.601	29.707	131.022	-17.506	51.257	-2.275	68.249	-48.182	102.821	-30.975	61.847	-12.99	53.293	-32.5416	31.3973	12.856	40.7794	-46.253	99.2924	39.7579	103.94	-23.2801
360	38.4794	47.1721	11.284	87.048	-50.051	167.452	-54.798	108.881	18.759	85.204	-259.2	355.799	-10.663	117.739	-98.781	109.869	48.726	71.709	30.872	87.836	-43.224	13.65	-23.452	167.055	-64.459	30.511	-62.518	52.175	29.455	129.383	-17.757	50.445	-2.275	68.249	-46.482	102.08	-30.796	60.092	-12.195	52.961	-30.8058	32.7236	12.5853	41.0023	-47.1107	98.4825	38.9435	102.213	-22.8956
361	36.8641	46.0028	11.284	87.048	-50.461	169.043	-54.329	109.51	19.556	86.465	-261.407	355.472	-9.346	118.341	-96.9	108.364	47.7	71.347	31.124	88.288	-43.224	13.65	-24.767	167.263	-64.365	28.1	-63.181	53.12	29.819	129.824	-18.126	50.748	-2.275	70.524	-48.142	103.367	-31.664	61.573	-17.026	53.828	-32.1821	34.8098	11.532	41.6575	-46.0505	96.9173	40.4495	103.089	-27.8483
362	38.1063	48.346	11.284	85.436	-50.035	171.489	-52.897	110.042	21.217	87.072	-262.62	356.419	-8.146	119.425	-98.329	108.953	47.616	72.142	31.033	86.02	-45.499	13.65	-23.671	167.665	-62.331	29.107	-63.109	53.013	29.282	130.576	-19.252	50.226	-2.275	68.249	-48.356	104.098	-32.041	60.728	-12.245	53.392	-31.3176	33.4266	13.5363	39.5509	-47.5907	97.1106	39.0049	103.217	-23.2232
363	37.9993	39.1277	12.896	83.824	-49.056	172.542	-51.657	109.406	21.198	87.74	-263.344	356.815	-11.455	119.049	-97.087	107.652	47.986	72.715	30.177	85.944	-47.774	15.925	-24.662	169.266	-63.986	30.84	-63.274	53.079	29.096	130.899	-18.989	50.946	-2.275	68.249	-48.325	104.251	-32.496	60.358	-13.552	53.251	-30.4099	33.1467	13.7365	40.652	-48.5781	96.2211	39.0595	103.399	-24.5109
364	38.1973	46.2075	11.284	85.436	-48.209	174.702	-50.423	108.721	22.258	88.151	-262.714	356.431	-10.202	118.686	-96.122	108.754	48.444	73.615	27.892	84.555	-50.049	18.2	-23.309	168.672	-62.515	31.439	-63.198	52.795	28.641	132.701	-20.528	50.798	-2.275	70.524	-51.751	105.62	-31.617	61.112	-15.582	56.208	-30.667	35.8085	14.692	40.9318	-48.6031	95.6478	38.9048	103.638	-25.7211
365	37.7127	44.5354	11.284	85.436	-47.848	175.848	-50.886	108.62	21.123	88.758	-261.2	357.777	-9.717	118.562	-97.49	108.588	48.497	74.007	27.359	85.952	-50.049	18.2	-23.082	170.315	-62.182	31.024	-63.097	53.058	30.152	132.03	-21.006	50.67	-2.275	70.524	-51.303	105.976	-31.589	60.527	-11.53	53.049	-30.3462	34.7984	13.5249	42.0124	-48.0048	94.6468	39.7465	106.117	-24.4199
366	38.1518	42.7632	12.896	83.824	-47.131	177.102	-50.009	108.199	20.828	88.371	-258.931	358.79	-9.708	119.821	-96.819	107.595	49.557	74.451	26.542	84.275	-52.324	20.475	-26.328	170.752	-61.005	31.194	-63.151	52.25	30.525	131.61	-20.86	49.916	0	68.249	-52.6	105.954	-31.078	60.67	-13.976	54.364	-29.4135	37.5853	11.9096	42.5015	-48.9239	95.0518	39.5145	104.893	-22.2882
367	39.0572	52.689	11.284	82.212	-46.422	179.308	-49.831	109.062	20.793	88.708	-257.928	360.21	-11.213	118.773	-95.722	109.706	50.613	74.61	28.581	85.329	-52.324	18.2	-25.033	168.666	-61.893	34.427	-63.636	53.116	30.386	133.334	-21.092	50.552	-2.275	70.524	-53.643	106.046	-31.12	60.441	-11.067	53.011	-29.4271	34.5186	10.1738	44.2146	-49.6746	95.8435	39.2165	105.328	-24.7042
368	37.1599	45.5364	12.896	83.824	-44.851	180.121	-49.059	108.761	19.712	87.756	-255.732	362.159	-10.463	117.878	-96.131	110.453	52.551	74.276	28.09	83.733	-52.324	20.475	-24.141	170.143	-60.557	32.173	-63.612	54.147	29.914	134.342	-22.299	49.76	0	68.249	-54.928	105.902	-31.499	59.931	-12.545	53.653	-29.6182	36.648	10.8063	44.2692	-49.1514	96.1506	39.0799	104.702	-25.0796
369	38.1404	49.5518	12.896	83.824	-44.697	181.494	-50.229	108.508	18.639	87.826	-251.328	362.603	-11.25	118.32	-97.097	110.708	53.453	73.843	28.786	83.762	-52.324	20.475	-23.05	169.591	-60.77	33.084	-63.733	54.979	29.656	134.28	-22.383	50.449	0	70.524	-55.294	106.312	-30.93	60.555	-10.074	51.509	-28.5148	36.6184	10.6311	43.0976	-49.645	95.9959	39.7397	105.674	-24.909
370	37.0666	46.8491	9.672	83.824	-44.554	181.282	-51.627	108.877	17.224	87.946	-248.106	363.454	-11.646	118.447	-97.731	109.16	54.43	74.574	28.001	83.736	-54.598	22.75	-22.936	167.858	-61.767	31.9	-63.937	54.371	29.19	135.077	-22.19	49.238	-2.275	68.249	-56.248	105.15	-31.068	60.672	-10.388	53.181	-30.7079	37.2577	10.2989	45.9937	-50.3503	95.5705	40.0059	103.642	-22.9752
371	38.5226	48.5599	11.284	83.824	-45.213	183.015	-53.091	109.021	16.234	87.545	-245.017	363.955	-14.463	118.458	-97.101	109.01	54.657	75.152	26.842	82.541	-56.873	25.025	-24.472	168.38	-58.244	32.188	-64.068	54.694	28.203	135.923	-21.597	48.72	-2.275	68.249	-56.787	105.892	-30.687	60.147	-8.456	52.041	-29.6978	35.9541	9.57548	47.0152	-51.4218	98.9193	40.9773	102.527	-24.6041
372	37.9106	51.0123	11.284	82.212	-45.772	183.792	-54.609	108.498	15.429	89.087	-243.046	363.471	-11.878	119.255	-97.905	109.249	54.955	76.421	25.831	83.285	-56.873	25.025	-24.389	167.342	-59.813	33.72	-63.952	53.85	28.622	136.41	-21.209	48.33	-2.275	68.249	-58.025	105.494	-29.627	59.984	-7.223	54.643	-27.8801	36.4819	10.0009	46.9446	-52.2112	99.0194	41.7986	102.55	-21.319
373	37.8856	50.6347	11.284	82.212	-45.049	185.336	-53.392	108.554	15.885	89.899	-240.841	362.72	-13.063	118.234	-98.252	110.238	55.126	76.941	29.151	84.282	-59.148	25.025	-24.917	168.239	-59.404	33.453	-63.673	53.6	28.405	136.512	-22.154	48.223	-2.275	68.249	-58.234	106.157	-29.88	60.499	-8.985	53.733	-27.6139	37.6353	10.3057	45.7138	-53.665	99.5722	42.4288	101.172	-22.7887
374	37.062	49.2788	9.672	82.212	-44.428	185.814	-52.04	109.257	16.095	90.869	-239.548	362.065	-8.54	119.042	-97.908	110.446	55.667	76.98	24.754	81.926	-59.148	27.3	-24.931	168.537	-60.08	35.338	-63.266	54.368	27.763	137.036	-21.291	48.717	-2.275	68.249	-58.428	106.921	-28.954	61.728	-9.472	52.781	-28.0144	38.3019	10.0555	43.978	-54.6842	98.8306	41.5984	100.093	-22.1289
375	37.4147	52.0634	11.284	83.824	-44.991	186.076	-51.306	108.519	15.86	92.212	-236.944	360.293	-13.941	117.344	-97.109	111.469	55.527	76.733	25.497	82.061	-61.423	27.3	-26.697	167.719	-57.968	33.874	-63.285	53.98	27.578	137.957	-22.111	48.231	-2.275	68.249	-58.096	106.571	-29.147	60.778	-9.379	51.923	-28.1645	38.9798	7.99663	46.5169	-54.7183	99.9362	41.7758	97.3177	-20.0086
376	37.6149	45.9072	9.672	82.212	-47.648	187.048	-53.55	108.729	14.405	93.593	-235.269	358.213	-10.58	119.518	-98.25	111.299	56.167	78.005	25.336	81.925	-61.423	29.575	-26.296	171.652	-56.631	33.255	-62.991	55.322	27.347	138.203	-22.04	48.374	0	68.249	-58.163	107.87	-28.573	61.33	-9.761	52.996	-28.6104	40.1469	9.68013	45.3635	-54.9822	100.018	44.2852	97.0788	-21.426
377	36.5615	44.4831	9.672	82.212	-50.782	186.016	-54.905	107.76	13.587	93.894	-232.268	357.32	-12.132	117.641	-98.608	108.176	56.781	78.781	26.946	83.261	-63.698	29.575	-27.129	168.678	-56.373	29.937	-62.98	54.5	27.521	138.294	-21.868	47.929	-2.275	68.249	-58.345	108.222	-30.363	62.424	-6.837	55.345	-27.4729	39.0049	8.9544	48.3983	-55.6033	99.3265	42.2354	94.6923	-22.0971
378	37.2804	49.049	9.672	82.212	-51.24	187.32	-54.425	109.114	15.72	98.19	-230.843	355.273	-11.674	119.033	-95.98	110.508	57.789	78.913	24.985	82.5	-63.698	31.85	-26.776	169.484	-56.097	31.097	-63.161	54.54	27.198	141.245	-22.33	48.829	-2.275	68.249	-56.986	109.447	-29.578	62.361	-10.471	56.814	-27.4547	42.3696	8.00573	44.3215	-55.237	100.45	42.3355	96.4145	-22.2631
379	38.0312	48.0025	11.284	83.824	-52.883	186.586	-55.414	108.09	15.182	96.634	-229.168	353.833	-16.356	117.554	-98.37	112.339	58.08	79.474	22.026	80.183	-63.698	31.85	-31.086	167.256	-57.956	30.045	-63.459	55.39	27.397	142.554	-21.483	49.522	-2.275	68.249	-57.421	109.504	-30.528	62.55	-8.101	56.37	-27.2773	42.7108	8.33333	46.7922	-56.0787	100.418	43.1704	94.6332	-20.839
380	37.2304	49.0991	9.672	82.212	-52.912	186.512	-54.959	108.729	17.58	99.154	-228.442	351.595	-13.036	118.816	-99.216	108.41	57.263	79.965	31.943	86.303	-63.698	31.85	-30.22	167.768	-56.271	29.687	-63.596	55.773	28.282	142.282	-22.935	49.619	-2.275	68.249	-57.557	109.886	-29.271	61.616	-4.778	57.189	-27.6845	41.2321	7.21403	46.6716	-56.6157	99.6951	44.6446	95.7798	-22.9388
381	37.5216	46.087	9.672	82.212	-54.764	185.737	-55.417	108.598	19.363	101.473	-228.117	349.824	-12.718	120.404	-97.788	108.371	57.962	81.226	25.606	82.038	-63.698	29.575	-30.02	166.529	-54.518	28.886	-64.383	54.748	28.421	140.77	-22.807	49.011	-2.275	68.249	-57.665	108.612	-29.456	61.011	-4.099	57.405	-30.9696	39.9558	9.83938	45.6342	-56.4769	100.994	44.0577	92.8928	-19.2783
382	36.9733	50.3048	11.284	82.212	-55.925	186.158	-55.322	108.969	19.444	101.849	-228.364	346.994	-9.341	120.875	-96.711	109.562	57.832	81.393	24.679	81.476	-63.698	31.85	-31.437	167.333	-53.814	30.683	-64.06	55	28.315	141.449	-22.849	48.967	-2.275	68.249	-57.301	109.046	-30.099	58.775	-7.385	56.994	-31.6634	42.406	8.75875	46.708	-56.7294	100.785	43.9234	94.4193	-19.722
383	37.5443	50.2252	9.672	83.824	-56.916	187.8	-55.858	109.941	19.53	103.435	-229.432	344.402	-11.618	120.599	-98.499	110.044	58.687	82.278	26.198	81.453	-63.698	29.575	-30.517	165.281	-55.063	26.539	-63.834	53.891	28.173	141.507	-22.459	48.732	-2.275	68.249	-57.122	107.691	-29.849	61.031	-4.544	57.769	-30.8831	42.5675	8.99308	45.6138	-56.9865	100.698	44.003	95.1541	-19.1032
384	38.791	50.7985	9.672	80.6	-57.811	187.232	-55.385	110.056	19.985	102.745	-229.788	343.584	-9.856	120.922	-97.45	111.389	58.47	82.834	26.838	80.959	-63.698	29.575	-32.619	167.153	-54.375	30.733	-63.962	53.763	26.303	142.089	-23.659	49.299	-2.275	70.524	-57.08	107.84	-30.041	60.008	-5.036	58.083	-33.2559	40.1469	9.9372	45.8139	-57.107	101.718	43.821	95.0836	-13.8388
385	38.7979	48.3824	9.672	80.6	-58.72	186.316	-54.396	109.773	20.467	103.365	-230.399	341.984	-10.932	120.609	-97.844	111.735	58.404	83.883	26.015	80.943	-63.698	27.3	-32.802	165.591	-55.789	27.394	-64.809	54.087	25.845	143.202	-24.588	49.152	-2.275	68.249	-57.172	108.175	-30.4	59.493	-6.356	57.956	-33.8725	40.7612	8.98625	44.5854	-57.0957	103.119	44.7242	93.8255	-19.8835
386	37.7241	47.7841	9.672	82.212	-60.005	185.277	-55.574	109.919	19.017	104.168	-232.908	339.569	-15.354	118.781	-96.547	111.52	59.832	83.803	28.072	82.214	-61.423	22.75	-33.01	164.275	-56.678	29.622	-64.573	54.16	25.816	144.099	-24.824	49.779	0	68.249	-56.524	107.464	-30.161	58.9	-2.282	59.529	-34.9713	41.3618	8.01028	46.2212	-56.6657	102.81	42.7655	93.1726	-16.9556
387	38.9253	49.1787	11.284	82.212	-59.91	186.075	-55.856	109.697	18.576	104.744	-234.512	338.574	-13.169	119.176	-98.843	108.706	61.467	83.514	28.39	81.634	-61.423	25.025	-34.802	166.648	-56.982	26.174	-64.933	54.234	24.248	145.478	-25.073	50.281	-2.275	70.524	-56.808	108.233	-30.284	58.305	-3.862	59.682	-36.3863	41.9738	7.5166	46.9674	-57.355	104.036	44.3193	92.5925	-15.6725
388	37.9629	49.0194	9.672	82.212	-60.433	185.988	-55.573	109.772	18.39	106.168	-236.293	337.171	-12.687	119.902	-97.205	108.612	61.687	82.864	27.584	81.766	-61.423	25.025	-35.345	164.605	-57.592	24.805	-65.205	53.626	23.354	145.816	-25.344	50.09	-2.275	68.249	-56.904	107.691	-30.231	57.12	-4.383	59.089	-34.2979	41.612	9.50495	45.8413	-57.4392	102.482	43.8438	91.4686	-16.7349
389	36.0906	47.6999	9.672	82.212	-60.296	187.204	-55.895	109.599	18.813	106.932	-235.239	336.826	-10.537	119.932	-100.348	110.163	62.401	83.959	24.361	79.433	-61.423	27.3	-35.277	163.546	-56.529	25.666	-65.233	54.07	22.52	147.849	-25.148	50.705	0	70.524	-56.448	107.657	-30.647	57.089	-1.358	60.002	-35.2784	41.3026	11.1179	44.9768	-57.744	103.531	44.2783	90.9636	-15.7635
390	38.6727	52.4478	9.672	80.6	-58.956	189.073	-55.854	109.62	17.927	108.473	-234.494	336.147	-9.452	119.026	-100.334	109.743	63.327	84.474	25.532	79.296	-61.423	27.3	-37.027	165.598	-57.776	28.143	-65.541	54.463	21.889	148.018	-26.146	50.803	0	70.524	-57.166	108.202	-29.969	56.512	-4.425	60.65	-34.2956	41.5733	9.92355	45.7707	-59.0317	103.319	45.227	92.0601	-15.7385
391	37.2918	49.3334	9.672	80.6	-60.224	191.797	-56.236	109.492	18.465	108.662	-232.598	336.06	-13.503	119.472	-99.376	109.448	63.804	84.861	29.429	82.404	-61.423	27.3	-36.49	161.489	-57.807	26.501	-65.375	54.823	21.072	149.138	-26.558	51.4	-2.275	70.524	-56.969	108.693	-30.405	56.541	-0.997	60.074	-33.3424	38.0698	10.5674	46.3986	-57.7167	103.774	45.3225	92.8996	-18.9962
392	37.1052	46.2052	9.672	80.6	-60.675	194.828	-56.449	110.052	20.403	109.598	-231.292	336.82	-12.368	120.696	-99.993	109.545	64.97	84.569	24.976	79.563	-61.423	27.3	-38.763	161.82	-58.455	24.645	-64.38	54.858	20.997	149.341	-27.219	50.628	-2.275	72.799	-57.424	108.545	-30.653	57.16	-1.416	61.459	-31.8022	38.5908	8.95895	45.5933	-58.7792	102.739	44.6127	90.7156	-17.5084
393	37.9675	50.0773	9.672	82.212	-59.396	196.592	-55.538	109.569	21.077	109.464	-230.936	337.247	-9.53	121.026	-97.11	110.197	64.909	85.683	28.657	81.026	-61.423	25.025	-38.868	160.518	-57.382	23.056	-63.937	53.753	20.45	149.505	-28.26	50.378	-2.275	70.524	-57.422	108.622	-31.104	54.571	-0.904	58.454	-30.8558	38.6545	10.0487	48.7487	-59.3456	104.259	43.9598	90.1036	-19.4786
394	38.245	51.7312	8.06	82.212	-58.889	199.175	-56.562	109.67	21.247	109.465	-229.405	337.455	-10.094	119.665	-96.907	109.9	64.213	86.195	28.436	79.894	-61.423	27.3	-33.621	161.386	-56.853	23.153	-63.792	54.32	19.982	153.18	-28.251	50.887	-2.275	70.524	-58.138	108.402	-31.026	54.808	-1.701	60.756	-30.2006	37.8605	9.45263	46.5033	-60.4604	105.003	43.3751	91.5301	-21.4714
395	38.5476	49.7065	6.448	82.212	-58.652	201.005	-56.239	110.027	22.806	109.805	-224.57	334.772	-6.559	118.956	-98.338	110.161	63.856	86.986	29.155	80.141	-61.423	27.3	-32.617	159.934	-58.516	23.34	-64.123	53.881	20.642	154.732	-29.435	50.328	-2.275	72.799	-58.272	109.086	-31.583	53.57	2.314	60.194	-28.0849	37.6444	10.1238	48.0002	-59.3889	104.607	42.6562	87.3509	-20.3703
396	38.1176	51.6016	8.06	82.212	-58.727	202.868	-55.935	109.57	24.251	109.516	-222.902	334.189	-8.834	122.59	-96.196	109.208	64.416	87.316	28.015	80.285	-61.423	27.3	-34.511	160.689	-57.986	22.31	-65.055	55.199	20.945	157.178	-29.753	50.785	-2.275	72.799	-58.455	108.922	-31.318	53.833	1.181	60.013	-28.8015	37.2486	9.91673	47.2586	-60.3785	105.485	44.2715	90.0013	-21.0005
397	38.3383	51.713	8.06	82.212	-59.415	203.56	-56.367	109.98	24.728	109.188	-221.723	333.793	-5.925	119.585	-98.066	108.789	65.587	87.486	28.734	81.912	-61.423	29.575	-33.562	162.222	-58.668	21.881	-65.054	55.194	20.667	158.363	-30.278	50.562	-2.275	72.799	-58.309	109.498	-31.041	52.796	2.572	61.561	-30.1711	38.5703	9.65738	46.8036	-60.1737	104.268	44.6423	90.5609	-22.1494
398	37.9948	53.2691	8.06	82.212	-59.873	205.222	-56.371	110.31	24.461	110.054	-220.633	333.023	-6.63	120.617	-97.306	109.704	65.46	87.599	29.494	81.884	-61.423	27.3	-31.848	162.714	-57.808	22.312	-63.949	55.52	21.285	157.381	-29.49	50.324	-2.275	72.799	-58.37	109.542	-31.561	52.964	3.809	61.858	-30.1802	39.8239	8.89298	48.1253	-59.3002	105.169	45.1223	91.5505	-22.9047
399	37.5603	49.9795	8.06	82.212	-59.582	207.078	-56.648	109.881	23.661	110.174	-219.484	332.23	-6.301	119.568	-95.637	111.512	66.864	88.593	29.815	81.503	-61.423	31.85	-36.565	158.784	-58.629	21.785	-63.497	55.29	21.715	156.984	-29.935	51.078	0	72.799	-58.548	109.273	-32.789	52.341	4.31	61.263	-31.9592	39.2756	10.283	47.5452	-59.7142	107.635	43.2091	89.1436	-21.6625
400	38.7796	51.5174	8.06	80.6	-57.977	209.056	-55.58	110.259	23.738	110.037	-218.503	331.578	-6.955	119.135	-97.296	110.363	67.264	89.357	28.215	80.623	-63.698	31.85	-33.627	160.975	-58.557	21.276	-62.884	55.418	21.212	156.629	-30.294	52.28	-2.275	72.799	-58.328	108.766	-32.891	52.558	5.696	61.608	-29.6637	40.9682	10.4059	46.6625	-60.672	105.537	44.0895	87.6444	-21.7899
401	37.9629	51.2216	8.06	80.6	-56.262	209.9	-54.907	110.444	24.027	112.777	-216.565	330.378	-7.434	120.415	-97.282	112.111	67.411	89.756	27.855	81.635	-63.698	29.575	-32.849	162.096	-58.643	21.301	-62.922	55.511	21.747	158.054	-30.66	53.285	-2.275	72.799	-58.019	109.281	-31.168	53.661	7.656	61.409	-27.8847	41.976	10.0555	47.6977	-59.8894	106.911	44.9699	89.1277	-24.2242
402	39.8421	52.0952	8.06	80.6	-57.404	210.788	-55.082	110.076	24.129	114.503	-216.134	322.648	-9.358	121.198	-97.403	110.212	67.882	87.872	26.547	80.817	-63.698	31.85	-30.913	160.506	-57.484	21.445	-62.763	56.099	22.808	157.83	-30.988	52.7	-2.275	72.799	-58.675	108.439	-32.128	53.713	8.46	62.581	-29.2588	44.6582	9.08862	48.7259	-59.8006	108.351	42.5448	88.022	-20.02
403	38.1108	52.2272	8.06	82.212	-58.015	211.562	-55.466	111.296	24.793	116.104	-213.346	319.092	-6.315	119.39	-97.524	111.688	68.395	88.681	25.208	79.33	-63.698	31.85	-31.889	160.69	-57.617	20.468	-62.782	56.033	23.293	159.92	-30.992	53.004	-2.275	72.799	-58.641	108.504	-31.242	54.614	8.266	61.495	-29.8116	42.4219	10.1147	48.0116	-58.3401	106.92	43.2546	87.8946	-18.6004
404	38.7615	50.0386	9.672	78.988	-58.434	213.571	-55.914	110.931	26.018	116.168	-211.778	316.621	-10.207	119.095	-96.814	109.11	68.585	88.218	22.456	77.274	-63.698	29.575	-33.943	156.483	-57.18	18.867	-62.999	56.211	24.281	157.551	-31.279	52.853	-2.275	72.799	-59.082	107.122	-32.083	54.479	7.396	64.042	-27.3887	43.796	10.2148	48.0048	-59.2342	109.161	41.5369	86.0951	-22.3041
405	38.2132	50.4094	9.672	82.212	-56.2	213.447	-55.078	111.274	26.734	118.945	-209.669	315.742	-7.553	117.835	-97.124	110.368	68.988	87.941	25.543	79.502	-63.698	31.85	-31.113	158.112	-58.02	23.349	-62.871	56.68	25.032	160.128	-32.939	53.267	-2.275	72.799	-58.936	108.102	-31.689	54.56	10.557	63.297	-28.5467	45.3771	10.1966	47.4497	-59.7574	110.444	42.886	87.674	-20.6957
406	38.3611	49.4699	9.672	80.6	-56.846	213.955	-54.515	110.06	26.835	120.511	-208.415	314.085	-8.352	120.983	-96.658	111.182	68.935	88.313	22.798	76.529	-63.698	31.85	-33.591	158.875	-57.506	20.976	-63.46	57.012	24.184	158.682	-33.844	53.421	-2.275	72.799	-58.068	107.553	-30.619	54.552	10.467	62.903	-26.3854	45.2475	9.89625	47.4701	-58.7996	111.962	42.4652	86.1429	-24.9613
407	39.7147	50.4367	8.06	80.6	-57.338	214.736	-53.266	110.123	26.674	121.606	-207.475	312.842	-6.985	119.922	-97.264	109.957	68.339	88.212	20.953	74.427	-63.698	31.85	-29.267	155.441	-58.652	18.456	-63.411	57.127	25.156	157.891	-34.584	52.809	-2.275	72.799	-58.737	108.404	-31.674	53.54	13.497	63.021	-27.5161	44.9494	9.282	49.0035	-59.1022	113.839	42.2695	87.4419	-24.7634
408	38.7069	49.6837	9.672	80.6	-58.083	216.362	-54.52	110.467	26.442	120.56	-206.615	311.322	-8.061	119.923	-98.909	111.202	69.711	86.955	23.236	74.33	-63.698	29.575	-30.513	154.896	-57.86	17.71	-63.272	56.39	25.064	158.154	-34.983	53.196	-2.275	72.799	-58.742	108.442	-28.956	54.755	13.964	66.105	-28.1304	45.1087	8.87478	49.0194	-58.1718	113.402	44.2419	89.2096	-24.2265
409	39.2529	50.5823	9.672	82.212	-58.038	217.369	-52.933	109.933	27.718	120.384	-206.169	309.008	-10.13	120.926	-98.038	112.176	70.981	86.667	22.773	75.995	-63.698	34.125	-31.731	154.645	-57.936	17.656	-63.214	56.102	24.904	157.695	-35.034	52.935	-2.275	72.799	-58.513	108	-31.12	54.003	14.127	67.776	-27.4888	47.4315	9.3093	47.7636	-58.5858	114.549	42.5084	89.0799	-22.6499
410	38.0039	50.1023	9.672	82.212	-57.559	217.87	-53.507	110.578	28.048	119.945	-204.9	307.973	-6.119	121.614	-99.681	111.183	71.509	87.079	23.1	75.529	-63.698	29.575	-34.101	152.009	-58.972	17.244	-62.977	55.781	24.863	157.348	-34.481	53.305	-2.275	72.799	-58.617	109.018	-29.558	54.913	13.527	67.519	-26.2853	46.41	10.0146	47.6863	-57.5643	115.499	39.9149	87.2918	-25.9054
411	38.7387	50.4004	9.672	83.824	-57.348	218.744	-53.846	110.931	29.241	120.664	-204.946	305.341	-10.195	120.549	-98.976	109.999	72.603	87.676	23.94	76.119	-63.698	34.125	-32.904	152.494	-57.026	19.792	-63.072	56.133	25.281	157.817	-34.071	54.219	-4.55	75.074	-58.298	109.362	-30.101	55.092	15.408	67.722	-27.5184	46.4509	7.59168	48.6395	-58.9225	116.651	40.7771	88.6499	-25.3526
412	39.6305	50.0932	9.672	80.6	-56.928	219.597	-53.471	109.755	29.752	120.358	-206.313	301.607	-10.16	120.187	-98.985	109.669	72.27	87.413	26.463	78.431	-63.698	27.3	-33.02	153.515	-57.829	16.359	-62.638	55.649	24.778	158.108	-34.236	53.84	-4.55	72.799	-58.217	108.928	-29.484	54.23	16.537	70.634	-29.8617	46.9332	8.09218	47.6089	-59.0408	115.329	42.0056	88.1767	-20.4614
413	38.6318	46.2189	9.672	82.212	-55.883	221.088	-52.538	110.468	29.853	122.733	-206.908	299.654	-9.328	123.052	-98.763	110.913	73.503	86.873	28.364	80.021	-63.698	34.125	-35.821	153.532	-57.628	17.715	-61.929	55.605	25.513	157.478	-34.681	54.352	-4.55	72.799	-58.038	108.386	-30.145	55.019	14.723	68.273	-33.2127	50.7166	10.0464	49.1559	-60.0805	116.621	41.6211	89.5849	-24.5472
414	38.3474	50.3093	8.06	80.6	-55.726	221.649	-53.547	110.096	28.887	121.618	-207.804	296.919	-6.066	122.625	-96.876	108.802	73.444	87.529	24.746	74.352	-63.698	31.85	-35.342	150.001	-57.981	17.299	-61.846	56.214	25.857	157.701	-34.126	55.619	-2.275	72.799	-58.073	108.533	-31.2	54.379	10.912	62.934	-30.5692	48.9034	8.82245	51.1761	-58.4425	117.506	42.4583	90.7429	-21.8036
415	38.6181	50.8918	8.06	80.6	-55.496	222.558	-53.374	110.061	30.108	123.064	-208.94	295.654	-9.05	121.996	-100.613	111.907	73.316	86.818	26.231	75.179	-63.698	29.575	-34.627	150.443	-58.293	17.41	-61.407	56.254	25.876	158.354	-34.544	56.21	-4.55	72.799	-58.078	110.109	-32.532	53.995	15.71	69.141	-31.1584	45.6137	9.26835	51.365	-56.4246	119.367	41.7167	90.5518	-23.0093
416	37.7923	49.3038	8.06	82.212	-57.104	223.318	-55.182	110.204	30.03	123.093	-209.993	293.12	-5.93	121.19	-96.989	109.093	73.219	88.344	27.63	77.438	-63.698	25.025	-32.902	148.948	-55.06	16.038	-60.923	55.489	26.43	158.963	-34.107	56.208	-2.275	75.074	-58.271	109.29	-33.122	53.334	13.002	66.648	-33.6427	46.2758	11.5911	49.3538	-54.8593	120.152	40.6565	90.1878	-21.0688
417	37.5307	50.4481	8.06	82.212	-56.244	223.165	-55.249	110.333	31.616	122.114	-210.131	289.567	-6.844	122.344	-99.769	110.116	72.625	87.743	29.786	79.332	-63.698	27.3	-35.357	147.836	-56.757	16.496	-60.152	54.916	26.315	158.258	-34.272	55.548	-2.275	75.074	-57.44	109.167	-32.874	53.135	12.741	64.6	-33.9043	46.0756	11.6503	51.6766	-55.0391	122.158	41.7349	90.4472	-21.6466
418	38.9981	52.7504	8.06	80.6	-55.021	224.054	-56.574	110.263	31.71	122.448	-208.913	287.709	-8.587	123.025	-96.713	112.19	73.266	88.041	29.723	79.545	-65.973	29.575	-37.603	147.67	-57.67	18.301	-59.308	55.425	25.965	158.082	-34.82	56.168	-2.275	75.074	-57.527	109.009	-34.28	53.055	16.344	70.983	-33.7041	46.3759	11.4797	52.1635	-53.8788	122.395	43.1454	91.8895	-21.3008
419	39.1391	50.8303	8.06	82.212	-54.799	224.133	-57.054	110.09	32.587	122.745	-210.113	285.348	-9.698	122.196	-98.692	112.053	73.594	86.917	25.069	71.923	-63.698	27.3	-38.661	150.122	-55.61	16.106	-59.59	54.7	25.693	157.899	-34.849	56.408	-2.275	72.799	-57.137	109.701	-34.127	52.075	18.973	76.024	-33.4197	46.2621	11.1771	52.2613	-54.7319	122.229	39.5918	91.2662	-21.6421
420	38.5203	49.9317	8.06	80.6	-52.686	223.626	-56.329	109.016	32.242	122.097	-211.751	282.899	-11.331	123.681	-94.117	110.044	73.726	86.71	24.75	71.452	-63.698	27.3	-40.636	146.656	-56.088	17.198	-59.833	55.209	26.885	159.063	-35.396	56.596	-2.275	77.349	-57.388	109.389	-34.706	51.924	12.94	67.814	-35.2602	46.2325	12.2554	52.7936	-52.1475	121.294	39.1323	90.3835	-23.6282
421	39.8262	52.8869	8.06	78.988	-51.318	224.103	-56.803	108.76	33.4	121.826	-213.995	279.884	-8.296	122.473	-95.949	110.011	73.445	86.2	26.117	71.157	-63.698	27.3	-35.027	146.375	-57.035	16.725	-59.831	54.908	26.157	159.855	-36.404	56.024	-2.275	75.074	-57.279	109.238	-35.039	51.862	11.765	66.932	-35.0714	46.6489	10.5264	51.4264	-52.6753	121.869	40.3403	90.5564	-24.0445
422	39.6351	51.2148	8.06	78.988	-50.861	224.363	-56.25	109.111	33.225	122.42	-214.586	277.393	-10.314	123.479	-97.06	113.526	74.274	85.375	25.629	69.044	-63.698	27.3	-36.315	144.763	-56.704	14.379	-60.097	54.946	27.47	159.053	-36.158	55.491	-2.275	75.074	-56.752	109.048	-35.374	52.126	13.111	68.82	-33.7769	46.8832	11.0224	51.3536	-53.0939	121.269	41.3368	91.1183	-21.9788
423	39.4872	53.8629	8.06	80.6	-50.574	224.706	-58.188	107.823	34.157	121.905	-215.052	274.714	-8.491	122.993	-94.642	111.946	75.326	84.209	24.62	68.509	-61.423	27.3	-35.703	145.556	-55.323	17.119	-59.413	55.5	26.836	159.68	-37.269	56.088	-2.275	75.074	-57.289	110.772	-35.236	52.632	12.195	69.194	-34.3502	46.3827	12.7127	50.844	-52.6207	122.934	40.8635	90.8794	-16.9374
424	39.7511	53.9585	8.06	78.988	-49.301	225.019	-59.323	108.063	35.627	122.308	-215.148	273.57	-12.665	123.928	-94.685	113.303	76.279	81.775	25.153	67.499	-61.423	29.575	-37.977	144.571	-58.133	15.62	-59.127	54.661	27.569	160.026	-36.263	56	0	75.074	-57.399	108.944	-35.278	51.724	13.018	68.672	-33.7519	46.1506	11.9506	51.9064	-54.4408	123.391	38.9844	89.3097	-17.9247
425	39.0777	52.3113	8.06	80.6	-49.765	225.134	-60.242	107.257	35.033	120.935	-215.205	272.121	-11.248	123.017	-95.512	113.006	77.355	81.819	24.434	66.026	-59.148	27.3	-37.315	142.223	-55.397	14.758	-58.909	53.894	27.301	160.223	-37.436	55.756	-2.275	75.074	-57.806	109.841	-35.782	51.182	12.501	67.902	-33.8429	47.4474	10.4764	52.2863	-54.7183	124.563	39.2119	89.6873	-21.7217
426	37.7195	48.0685	6.448	78.988	-48.686	225.188	-61.359	108.714	35.194	120.291	-214.731	271.788	-11.477	121.481	-95.824	113.324	78.866	83.151	25.083	64.979	-59.148	27.3	-36.494	140.562	-56.184	14.605	-59.504	53.611	27.684	158.261	-38.664	55.992	-2.275	75.074	-58.164	108.946	-39.322	49.794	11.959	67.636	-32.5734	45.2634	8.21503	52.3819	-55.4327	125.327	38.0926	89.5144	-22.1153
427	38.9958	50.6028	9.672	82.212	-49.218	225.571	-63.602	107.776	36.549	119.307	-214.728	270.832	-10.428	123.11	-93.177	114.605	79.118	82.446	26.971	64.753	-61.423	29.575	-34.948	140.33	-55.216	16.71	-59.787	54.223	28.793	157.696	-39.84	55.872	-2.275	75.074	-58.121	109.107	-40.971	49.869	12.852	67.865	-31.8727	47.0265	9.5186	52.234	-55.3189	126.228	36.8004	92.1762	-21.0551
428	41.1843	52.0998	9.672	78.988	-48.004	226.998	-66.424	106.292	36.674	119.3	-215.324	269.827	-9.642	122.877	-92.232	112.961	79.894	81.409	26.193	63.859	-61.423	29.575	-35.887	139.242	-56.806	15.352	-60.386	54.533	29.297	156.778	-39.155	56.98	-2.275	75.074	-58.886	109.306	-42.081	49.708	13.973	67.662	-32.3801	44.0417	9.48448	53.69	-54.2519	126.374	37.674	89.5463	-23.7988
429	39.6988	51.8996	8.06	77.376	-46.563	226.081	-67.148	107.026	37.027	117.971	-215.615	269.964	-10.243	120.609	-94.398	114.077	79.442	81.341	27.581	61.235	-61.423	29.575	-36.982	138.251	-55.683	14.491	-59.786	53.995	29.021	156.419	-39.838	55.943	-2.275	75.074	-59.518	107.927	-43.353	50.199	11.229	64.928	-32.7918	45.7821	9.15915	52.5593	-55.1346	126.749	38.4566	88.775	-18.0157
430	38.1563	49.5882	9.672	78.988	-45.063	226.469	-66.479	106.903	37.56	116.766	-215.382	268.578	-8.635	116.135	-94.607	114.094	80.68	79.153	28.462	62.02	-61.423	29.575	-33.944	135.74	-55.926	16.534	-60.193	54.593	29.394	155.961	-39.601	56.961	-2.275	75.074	-58.689	107.441	-44.934	50.711	14.715	67.338	-30.551	45.6183	10.1897	50.389	-54.1768	128.972	36.9505	92.4401	-24.5654
431	38.0084	48.6805	8.06	78.988	-42.877	227.642	-65.571	105.85	36.678	115.985	-214.726	269.553	-9.034	118.584	-97.615	113.919	81.014	80.077	28.527	63.195	-63.698	31.85	-35.283	135.621	-54.449	16.543	-60.19	54.714	28.899	155.887	-40.316	57.283	-2.275	75.074	-59.488	108.048	-45.341	50.713	12.202	64.367	-32.1139	44.3648	10.6698	49.4858	-53.7787	130.148	36.243	92.6448	-22.0971
432	39.9058	53.3169	9.672	78.988	-43.801	227.049	-65.354	104.259	35.998	116.04	-212.571	267.277	-11.382	118.963	-96.981	114.159	81.284	80.363	28.358	63.951	-63.698	31.85	-36.481	134.728	-52.13	21.297	-60.119	54.842	30.554	155.258	-40.336	56.361	-4.55	75.074	-59.267	107.149	-47.489	51.086	12.203	62.966	-32.082	47.3541	12.69	51.7562	-54.4453	132.021	34.9394	92.8655	-20.3681
433	39.1436	52.6094	9.672	77.376	-44.314	227.951	-72.972	100.49	35.92	115.75	-210.625	265.257	-8.19	117.727	-96.855	112.616	81.311	79.452	29.788	62.151	-59.148	29.575	-34.314	130.969	-55.311	17.298	-59.592	55.295	30.825	155.764	-40.255	57.033	-2.275	75.074	-59.219	107.41	-48.958	51.461	14.189	62.527	-30.9787	47.3518	10.0146	54.3679	-53.5967	130.801	34.4503	89.9763	-21.3486
434	39.9809	51.7198	8.06	77.376	-43.616	228.49	-74.641	101.435	35.98	114.919	-210.927	263.919	-13.355	116.499	-95.734	113.545	82.372	78.16	30.355	62.801	-63.698	34.125	-34.883	134.324	-55.006	18.26	-59.927	56.172	30.89	157.394	-39.619	56.45	-4.55	77.349	-59.689	107.759	-49.413	51.659	11.212	59.491	-30.3872	45.1656	10.3331	54.2656	-54.2951	132.596	34.6733	91.6052	-26.0624
435	40.3266	53.5467	9.672	77.376	-45.979	230.434	-76.055	102.975	36.581	116.051	-210.065	263.658	-11.906	117.4	-96.436	113.323	82.993	78.4	31.2	61.972	-65.973	36.4	-35.327	135.095	-56.385	19.157	-59.909	56.023	31.706	157.882	-40.09	56.308	-4.55	77.349	-59.77	108.135	-50.58	52.088	14.786	59.714	-31.5156	45.7366	10.1738	55.3143	-55.5555	133.408	33.5585	91.8759	-26.3104
436	39.262	53.5239	8.06	77.376	-47.021	231.7	-76.871	102.537	36.835	114.105	-210.782	262.714	-9.162	118.131	-98.983	113.866	84.642	76.677	32.021	60.299	-63.698	34.125	-31.534	133.296	-55.309	19.091	-60.415	56.32	32.295	158.74	-40.24	56.971	-2.275	77.349	-59.457	109.469	-50.822	52.281	12.407	56.184	-32.6963	47.3063	10.6834	59.6596	-55.1528	134.566	34.4549	90.8112	-24.2242
437	39.2051	52.1316	9.672	75.764	-47.16	233.397	-75.298	102.552	37.741	113.88	-211.136	261.307	-7.534	118.14	-98.355	112.556	86.351	75.916	29.512	61.402	-63.698	34.125	-36.192	131.971	-55.602	17.784	-60.041	55.315	31.34	159.006	-40.087	56.755	-2.275	77.349	-58.7	108.812	-53.663	52.1	14.438	56.063	-32.4187	47.6521	10.738	58.5744	-54.8844	135.272	33.943	90.8043	-23.3529
438	37.7081	52.507	9.672	78.988	-47.299	235.402	-74.791	102.345	38.324	113.706	-211.332	261.604	-11.888	118.946	-97.406	111.076	87.451	74.356	30.469	61.062	-65.973	36.4	-34.433	130.57	-55.654	15.863	-60.177	55.29	31.053	159.19	-39.89	55.771	-2.275	77.349	-59.091	110.763	-54.054	51.65	13.471	56.615	-31.3973	48.0503	11.5638	61.0041	-55.1005	135.39	32.7714	89.0253	-21.6512
439	39.0663	52.0657	9.672	75.764	-47.943	236.228	-73.545	102.496	39.099	114.64	-211.245	260.162	-8.35	118.623	-97.112	111.388	88.506	73.194	31.667	61.873	-65.973	36.4	-35.42	125.325	-58.026	16.461	-60.249	56.195	30.995	159.743	-40.282	56.239	-2.275	77.349	-58.943	110.933	-54.919	50.996	15.197	56.282	-32.6758	46.9878	10.5128	61.8663	-55.3507	135.986	31.2244	87.5306	-24.231
440	37.8606	53.897	9.672	77.376	-47.971	234.786	-73.136	101.969	39.47	114.62	-210.988	259.92	-11.32	118.512	-96.722	110.943	88.321	73.1	31.302	64.122	-63.698	36.4	-35.54	129.812	-59.386	14.301	-60.334	56.248	31.202	160.271	-39.994	56.514	0	79.624	-58.908	112	-56.64	52.369	12.08	54.283	-33.1627	48.2664	11.1612	65.0422	-54.12	136.181	33.3242	89.3575	-21.1734
441	40.1811	55.0482	9.672	77.376	-48.966	233.994	-74.202	102.273	39.083	113.688	-209.964	260.722	-12.04	120.763	-96.849	112.333	88.881	73.917	33.428	63.368	-65.973	36.4	-33.617	129.139	-58.224	15.456	-60.014	55.295	30.804	159.583	-41.402	55.271	0	77.349	-59.975	111.379	-57.447	51.61	15.28	53.88	-32.007	52.2454	9.19555	66.8486	-57.4233	138.955	28.847	85.2852	-21.8446
442	38.4043	54.0131	9.672	77.376	-48.749	234.859	-74.562	103.462	39.695	113.874	-211.01	260.714	-10.857	120.803	-97.369	111.579	88.749	72.967	33.632	61.248	-68.248	36.4	-36.462	128.35	-61.391	12.035	-59.202	56.095	31.55	160.284	-41.859	56.051	-2.275	79.624	-60.442	112.279	-58.715	52.623	12.622	52.491	-33.7974	51.1352	13.6568	64.9513	-55.7875	137.537	30.4645	85.2647	-21.7581
443	38.6227	52.1817	6.448	78.988	-48.06	235.616	-75.22	104.288	39.394	113.701	-210.619	261.225	-13.056	120.141	-95.468	111.411	89.331	74.217	33.861	61.76	-68.248	38.674	-34.877	128.875	-57.582	16.18	-59.081	56.517	32.219	159.582	-41.842	55.731	0	79.624	-60.466	111.798	-58.88	53.039	14.453	53.39	-32.9625	50.8713	11.4546	66.6347	-55.3917	137.783	30.5441	85.6515	-24.7679
444	39.262	51.4582	8.06	77.376	-45.808	235.954	-77.244	104.203	39.83	113.595	-209.99	261.545	-13.377	120.256	-97.41	112.019	89.632	73.659	33.288	61.165	-65.973	36.4	-35.348	127.101	-58.155	15.341	-59.234	56.278	32.298	160.191	-41.566	55.569	0	81.899	-60.998	114.354	-60.572	52.981	12.326	52.072	-32.9852	53.012	12.8902	65.0445	-55.419	137.435	30.9855	86.2862	-21.7081
445	39.2278	53.0712	8.06	78.988	-44.774	237.898	-80.967	103.869	40.163	114.234	-210.521	260.411	-12.465	119.777	-95.822	111.869	90.448	73.741	33.597	61.601	-68.248	36.4	-35.987	128.89	-58.854	12.668	-59.247	56.322	31.235	159.758	-41.805	56.348	-2.275	81.899	-59.576	113.084	-60.371	52.794	17.876	52.621	-32.5006	52.9074	10.6265	69.7742	-55.0846	139.089	30.2211	84.6391	-27.8869
446	39.3188	51.6152	9.672	78.988	-45.068	238.849	-82.562	103.611	39.158	113.654	-211.363	258.953	-12.277	119.033	-97.194	112.765	92.057	72.584	34.204	62.995	-68.248	36.4	-35.265	126.354	-56.848	16.68	-59.053	55.684	31.513	159.533	-42.09	56.541	-4.55	84.174	-60.535	113.381	-62.007	53.463	17.814	52.913	-33.3106	52.9529	11.4615	67.679	-55.4918	138.168	30.2234	83.7132	-18.8711
447	39.3097	52.9802	8.06	77.376	-45.745	239.878	-83.512	103.779	39.14	113.991	-211.45	259.212	-11.144	117.678	-97.9	110.683	92.609	72.097	35.425	65.221	-70.523	38.674	-38.614	126.998	-56.627	15.866	-59.44	55.523	31.152	159.599	-42.555	58.055	0	81.899	-60.647	112.747	-62.111	54.087	16.701	53.988	-32.437	55.9491	12.062	68.8711	-54.3202	139.2	30.4736	83.5516	-22.1926
448	40.2266	54.4044	8.06	77.376	-45.883	239.837	-82.606	104.125	39.089	113.56	-212.844	258.256	-12.091	116.96	-96.59	112.332	93.547	72.294	35.956	60.795	-77.348	36.4	-34.843	123.811	-59.271	13.447	-59.727	56.408	31.35	161.351	-43.213	59.425	-2.275	79.624	-61.533	113.432	-63.262	54.26	16.822	53.289	-30.9218	56.925	11.5775	69.1941	-53.8629	138.704	31.3131	81.3768	-24.7838
449	38.898	52.6913	8.06	78.988	-44.155	240.519	-82.348	104.813	39.508	113.345	-213.585	257.685	-8.391	117.506	-97.225	113.71	95.218	70.6	35.824	62.533	-75.073	36.4	-35.43	122.987	-58.364	12.26	-59.953	55.841	31.213	160.613	-44.309	60.127	-2.275	81.899	-61.114	112.909	-65.292	53.925	16.723	52.521	-30.2052	56.4632	9.5368	69.8243	-54.6432	141.732	30.9992	81.8681	-22.8569
450	39.1164	56.3222	8.06	77.376	-42.648	240.433	-81.295	104.868	40.378	112.949	-215.653	258.001	-8.913	117.615	-97.954	107.54	95.569	69.316	34.769	62.581	-77.348	36.4	-40.925	121.574	-58.649	12.911	-60.328	55.687	30.586	159.075	-44.541	59.464	-4.55	81.899	-60.171	112.46	-64.966	53.069	20.426	53.752	-29.029	57.3823	14.2847	68.9507	-56.4405	141.375	28.8356	79.8343	-21.7877
451	38.3019	54.2337	8.06	77.376	-42.731	239.885	-83.179	104.488	40.285	112.851	-216.421	257.032	-7.112	117.378	-98.442	113.475	96.576	69.058	35.474	62.563	-75.073	36.4	-34.723	122.311	-56.467	13.712	-59.799	56.161	31.871	161.069	-43.006	60.503	-2.275	81.899	-60.151	113.205	-65.401	53.182	20.971	53.643	-28.1963	56.7044	12.5921	68.9803	-53.913	141.685	28.5421	80.494	-21.4805
452	39.5099	53.5285	9.672	77.376	-43.819	241.809	-85.061	104.171	39.417	112.725	-217.693	255.913	-6.27	116.296	-96.377	112.205	97.351	70.26	36.02	61.692	-77.348	34.125	-32.925	124.185	-56.603	13.192	-60.069	55.135	31.618	160.394	-43.592	58.724	-4.55	81.899	-60.621	113.284	-65.319	52.9	19.905	53.295	-27.8233	60.3239	11.3272	69.3511	-57.2208	143.978	31.1834	82.0729	-22.4133
453	39.8102	57.0616	9.672	78.988	-42.942	244.29	-84.989	104.919	39.938	112.984	-216.631	257.078	-8.987	116.293	-97.055	113.805	97.61	70.131	35.763	63.711	-77.348	36.4	-37.792	119.407	-57.668	13.194	-59.321	55.63	31.935	160.813	-43.743	60.327	-4.55	84.174	-59.725	114.047	-66.596	52.838	18.31	53.05	-27.259	60.3421	11.1976	70.1928	-57.7099	143.616	30.7626	79.8275	-20.3794
454	40.4814	55.2211	9.672	78.988	-42.279	245.349	-86.147	105.064	39.952	113.145	-216.886	254.856	-7.77	116.663	-98.407	113.708	97.102	70.137	37.61	64.202	-75.073	36.4	-34.424	120.094	-57.627	11.376	-59.389	55.203	31.052	160.898	-44.011	59.597	-2.275	81.899	-60.548	114.235	-66.515	52.553	20.403	53.645	-26.3877	60.7152	11.1157	72.1289	-57.8419	143.603	29.1496	79.5818	-21.5602
455	37.6581	55.5373	9.672	77.376	-41.636	245.657	-85.499	104.987	40.725	113.224	-218.552	254.791	-6.108	116.154	-97.433	112.61	98.888	71.094	37.151	65.6	-75.073	36.4	-37.963	121.804	-57.7	13.328	-58.715	55.206	31.111	159.71	-44.171	59.606	-4.55	79.624	-61.101	114.699	-67.677	52.541	19.74	53.455	-26.0124	60.1646	8.33787	71.2394	-59.9235	146.33	30.3166	79.2792	-23.7965
456	38.1927	54.8639	8.06	80.6	-42.235	246.422	-86.061	104.803	40.31	113.504	-220.826	253.715	-9.616	116.494	-98.509	109.231	98.873	71.503	37.354	63.73	-77.348	36.4	-35.179	114.78	-57.339	13.472	-58.865	54.59	30.697	159.326	-44.655	59.452	-4.55	77.349	-61.487	113.806	-67.176	53.025	18.056	53.089	-24.1787	61.1747	9.70288	70.4454	-60.8085	145.841	31.3222	80.1824	-25.455
457	38.0653	56.081	8.06	77.376	-43.042	246.671	-86.346	104.831	40.874	113.737	-223.594	253.768	-8.964	116.902	-96.969	112.28	99.357	71.103	36.812	63.856	-75.073	36.4	-36.775	114.837	-58.021	15.435	-58.476	54.555	31.056	160.001	-44.335	59.889	-4.55	81.899	-61.828	113.557	-67.431	52.927	18.599	52.675	-24.3152	59.8234	10.8131	69.7879	-59.9121	146.464	31.1197	79.6295	-27.259
458	37.6035	53.7287	8.06	80.6	-42.749	246.895	-86.485	105.126	41.616	114.222	-224.195	252.837	-9.805	118.58	-97.612	110.291	99.821	70.2	37.082	65.337	-77.348	36.4	-36.664	112.225	-56.605	17.414	-59.104	55.083	30.549	161.317	-44.529	61.658	-4.55	79.624	-60.846	113.959	-67.303	53.516	17.677	52.778	-22.2063	61.4864	9.8371	69.433	-61.9733	147.356	31.0902	80.1551	-30.8126
459	39.2597	54.1609	8.06	82.212	-42.374	248.414	-86.056	105.721	42.422	114.419	-224.857	251.954	-7.902	118.35	-97.913	114.086	100.726	70.897	36.62	65.88	-79.623	34.125	-35.55	113.861	-59.202	14.22	-58.728	54.931	29.771	161.897	-45.646	60.847	-4.55	81.899	-61.225	113.779	-67.73	53.685	17.777	54.96	-23.8739	60.995	9.44125	69.7651	-62.9242	148.087	31.0196	79.8502	-21.9583
460	38.4976	56.5497	8.06	78.988	-43.161	249.596	-87.32	106.285	41.075	113.64	-225.268	252.758	-7.463	118.301	-99.285	113.527	101.753	70.547	36.094	63.798	-79.623	34.125	-33.506	113.231	-56.271	19.438	-58.293	55.518	30.374	161.231	-45.553	60.559	-4.55	81.899	-61.072	115.707	-68.195	53.245	15.893	54.34	-22.5976	61.2407	9.42533	70.3111	-62.6194	148.464	31.8227	80.3644	-24.9022
461	36.6412	54.5591	8.06	80.6	-42.961	250.393	-88.022	106.379	41.911	113.706	-226.766	252.979	-8.258	118.325	-98.978	111.948	103.035	70.364	37.937	63.198	-79.623	34.125	-36.486	109.122	-58.342	18.67	-58.644	54.778	29.088	161.128	-45.431	59.924	-4.55	84.174	-62.05	114.109	-69.329	53.732	13.364	54.129	-22.0334	61.1611	12.5671	69.0986	-63.6044	149.595	33.5608	81.7021	-26.0192
462	38.493	54.2155	8.06	78.988	-43.839	251.36	-88.387	106.288	41.911	113.919	-228.431	252.082	-6.497	118.246	-97.536	111.736	103.073	70.625	37.651	61.616	-79.623	36.4	-37.082	110.521	-57.968	18.737	-58.797	55.915	30.416	161.931	-45.619	59.616	-4.55	84.174	-62.277	115.012	-69.704	54.484	10.666	52.065	-21.8104	62.1189	11.6935	69.1077	-63.8047	150.764	32.8897	79.4157	-28.2259
463	36.6298	52.7845	8.06	78.988	-44.159	252.73	-89.388	105.697	41.598	114.302	-229.857	252.785	-9.084	119.576	-98.008	112.401	103.927	70.146	39.583	58.882	-77.348	34.125	-36.844	111.696	-58.881	15.763	-59.042	55.134	29.972	160.942	-45.061	58.129	-4.55	84.174	-63.395	115.207	-70.21	54.237	12.969	54.138	-24.2128	60.242	12.4352	69.8243	-62.4624	148.828	32.1458	80.2142	-24.4995
464	37.5489	55.924	9.672	77.376	-44.095	253.396	-91.153	105.084	41.1	114.603	-231.852	253.979	-5.29	118.11	-98.092	113.577	104.188	69.738	40.16	60.039	-79.623	34.125	-38.661	110.504	-57.514	16.441	-58.813	55.117	29.639	160.868	-45.513	58.349	-4.55	86.449	-63.278	116.317	-71.877	53.857	10.313	51.994	-22.9525	60.3148	11.6981	68.2818	-63.2973	149.984	34.5709	81.1151	-27.2113
465	39.1505	53.7014	8.06	78.988	-43.732	254.327	-91.541	104.593	40.123	115.222	-231.759	253.616	-6.142	121.017	-99.394	113.159	104.778	68.965	40.57	61.087	-79.623	34.125	-33.482	112.538	-59.93	16.255	-59.315	55.176	30.568	160.247	-45.787	57.525	-4.55	86.449	-63.2	114.574	-73.425	53.742	9.002	52.078	-23.3028	60.7789	10.4104	71.4032	-64.8375	151.181	32.3164	81.4518	-31.6316
466	37.972	54.3839	11.284	78.988	-43.658	255.165	-91.29	104.308	40.096	116.433	-232.478	254.21	-5.28	119.588	-99.146	112.46	105.873	69.645	39.44	59.896	-79.623	34.125	-36.594	112.247	-57.654	19.253	-59.317	54.864	30.998	161.369	-45.723	56.402	-4.55	86.449	-62.45	114.344	-75.015	53.685	10.016	54.783	-22.725	59.4321	10.3968	69.0554	-64.6623	151.599	35.0964	83.6813	-28.0166
467	38.5817	53.5899	9.672	77.376	-41.487	257.188	-91.142	103.792	40.731	117.552	-232.403	255.076	-5.175	118.169	-99.102	113.603	105.81	70.449	39.095	63.103	-77.348	34.125	-29.882	110.491	-58.607	19.621	-59.157	55.859	30.031	163.501	-44.853	56.601	-2.275	84.174	-62.687	114.625	-77.079	53.951	6.73	50.603	-24.0695	59.5618	11.4774	71.1779	-67.249	153.97	34.5527	82.0297	-31.9251
468	38.4748	52.9802	11.284	77.376	-42.499	257.34	-91.516	103.671	40.502	118.155	-232.82	254.004	-4.433	118.674	-100.72	111.513	106.353	68.702	39.259	58.742	-77.348	34.125	-33.722	114.286	-57.469	17.844	-59.69	55.796	30.991	162.895	-44.213	55.225	0	84.174	-62.397	115.009	-77.474	54.004	4.941	50.551	-23.3961	59.2729	10.8336	70.8481	-67.2445	154.943	34.803	81.5724	-27.8483
469	40.2197	54.3338	8.06	77.376	-43.35	258.75	-92.878	103.054	39.62	119.851	-233.722	252.905	-5.825	119.776	-98.61	112.635	106.174	67.504	40.184	59.117	-75.073	36.4	-27.827	116.324	-59.682	17.929	-59.188	56.138	31.056	162.603	-44.23	54.614	0	84.174	-61.583	115.421	-79.105	54.202	3.655	50.314	-25.5755	56.4609	9.5732	70.1064	-67.9224	155.385	36.0815	83.5903	-29.7274
470	37.7855	53.8083	9.672	78.988	-43.557	259.174	-93.605	102.711	39.923	121.031	-234.555	251.838	-5.114	119.205	-99.241	111.663	106.398	66.068	41.079	57.996	-72.798	36.4	-27.748	115.006	-60.675	15.084	-59.355	55.119	28.136	162.08	-44.728	53.013	0	84.174	-62.102	113.884	-77.631	53.463	3.305	50.574	-23.2255	55.4531	9.3366	72.1334	-67.9178	154.939	33.852	82.8328	-29.5522
471	40.2561	54.6614	8.06	78.988	-43.557	259.909	-94.408	103.033	39.286	121.832	-234.839	252.019	-5.179	113.117	-100.211	112.12	105.919	66.709	40.998	56.754	-72.798	34.125	-28.926	113.224	-59.828	16.103	-59.389	55.468	27.23	163.906	-45.006	52.848	0	84.174	-62.43	114.463	-77.846	53.385	0.411	47.415	-24.7156	54.7274	10.6743	69.549	-68.862	156.097	37.3737	84.2728	-30.2916
472	40.1924	55.6055	8.06	77.376	-43.562	259.992	-94.365	102.555	40.375	123.845	-235.679	251.612	-2.929	113.987	-99.594	112.706	105.294	65.234	40.391	57.349	-72.798	36.4	-27.075	113.407	-60.2	16.497	-59.259	55.155	25.497	165.923	-44.588	51.786	0	84.174	-63.14	113.894	-78.606	53.919	1.504	51.435	-23.7828	54.9617	10.2193	72.7568	-69.0463	156.709	36.0679	83.8633	-31.1038
473	40.0332	55.1028	9.672	78.988	-43.481	259.86	-93.85	102.771	41.488	122.311	-236.964	251.295	-4.519	115.836	-100.398	112.586	105.49	66.028	40.849	58.215	-72.798	36.4	-28.116	112.346	-59.543	15.263	-58.865	54.408	25.411	165.494	-44.717	51.701	2.275	84.174	-63.046	115.057	-79.372	54.077	0.863	49.221	-23.9717	56.5201	9.10228	73.3983	-70.9072	156.035	35.995	83.9225	-29.2838
474	40.3471	54.4931	9.672	78.988	-43.523	260.497	-93.126	103.16	42.257	120.378	-237.501	250.946	-4.167	114.113	-99.98	113.747	104.907	65.928	40.349	59.538	-70.523	36.4	-27.668	111.585	-58.947	14.985	-59.008	54.374	24.592	166.163	-43.679	51.605	0	84.174	-63.724	114.141	-80.447	54.199	0.192	48.574	-23.7191	55.9741	9.5095	71.8854	-71.551	156.932	35.5446	83.993	-27.3364
475	39.7079	54.0972	9.672	78.988	-44.006	261.355	-94.063	103.357	42.249	119.402	-237.755	251.805	-2.733	120.188	-100.988	111.975	105.758	66.142	40.672	58.705	-70.523	34.125	-27.718	115.867	-58.428	14.881	-58.82	54.69	25.432	167.828	-42.906	51.052	2.275	84.174	-63.978	113.888	-81.735	53.887	-0.121	49.282	-21.7103	56.5201	7.21858	73.7032	-72.668	156.875	37.4943	85.9631	-29.3111
476	40.1651	53.1008	9.672	78.988	-44.41	261.676	-93.925	102.997	42.734	118.421	-238.326	250.62	-5.247	116.858	-99.988	110.256	105.831	67.546	40.64	57.083	-70.523	34.125	-24.16	109.956	-58.957	13.909	-58.432	53.94	25.308	166.617	-42.693	49.752	0	81.899	-63.463	113.143	-81.242	53.879	1.471	49.816	-23.0981	54.8707	9.35253	71.1119	-73.8419	157.064	37.997	85.7516	-32.1617
477	40.1811	55.1938	9.672	78.988	-44.644	261.817	-94.567	102.846	43.254	120.53	-240.155	249.995	-4.914	116.922	-101.314	114.783	107.186	67.139	40.519	56.631	-70.523	34.125	-24.01	110.503	-58.014	14.641	-58.559	54.404	25.074	166.666	-42.961	49.93	2.275	81.899	-63.533	113.498	-82.594	54.324	0.208	48.962	-21.3645	53.2782	9.06588	72.9228	-73.346	156.279	38.2541	87.2235	-31.2153
478	41.1821	54.6478	11.284	77.376	-45.766	261.444	-94.904	102.998	44.481	120.79	-240.816	249.451	-3.791	119.166	-100.677	112.481	108.073	65.964	40.241	60.009	-70.523	31.85	-24.412	114.2	-57.898	14.757	-58.921	54.109	25.695	166.948	-44.013	49.745	2.275	81.899	-63.988	114.023	-83.354	54.062	1.58	47.857	-20.3499	54.989	8.2537	74.6632	-77.0793	156.736	37.8378	85.5605	-31.1493
479	39.2165	52.714	11.284	78.988	-46.537	261.514	-97.234	102.824	43.655	122.174	-241.046	249.245	-2.955	119	-101.033	112.235	107.466	66.27	41.087	60.46	-70.523	31.85	-26.878	111.544	-58.609	15.435	-58.921	53.368	26.547	167.24	-44.629	48.99	2.275	81.899	-65.798	113.336	-83.665	54.771	1.436	48.096	-20.1042	54.4203	7.56893	76.3399	-74.6723	155.79	39.7397	86.4341	-33.2173
480	39.6214	54.5204	11.284	78.988	-47.467	261.174	-97.874	102.683	42.862	122.773	-241.594	248.535	-4.527	117.12	-101.209	113.663	107.857	66.15	41.098	60.929	-70.523	31.85	-23.606	108.632	-59.519	12.463	-58.455	53.212	26.369	166.729	-45.676	48.758	0	84.174	-65.068	113.012	-84.441	54.343	1.584	46.628	-21.6557	55.3871	5.72845	76.5173	-77.118	155.1	38.2974	85.995	-30.6624
481	41.2935	55.4554	9.672	80.6	-46.977	260.931	-97.829	103.347	42.408	123.637	-242.142	249.485	-5.09	119.129	-100.795	113.448	109.023	65.778	40.907	64.053	-68.248	31.85	-22.556	110.35	-59.501	13.528	-58.353	53.348	25.587	167.014	-45.957	47.745	2.275	81.899	-65.611	112.151	-84.862	54.608	3.762	46.85	-22.0993	56.1879	7.3073	75.3457	-77.507	154.302	39.7079	85.8267	-28.1941
482	41.5187	55.601	11.284	80.6	-47.184	260.594	-98.021	103.411	42.525	123.341	-240.761	249.579	-6.442	121.034	-100.779	111.417	109.304	64.474	38.726	70.53	-70.523	31.85	-23.558	107.722	-60.239	11.661	-58.329	52.951	24.953	167.544	-45.635	48.406	2.275	79.624	-65.81	112.671	-84.802	54.99	2.606	45.383	-21.021	56.2403	5.55555	75.9509	-79.054	153.781	39.7784	87.7991	-32.2003
483	39.5463	55.1688	11.284	78.988	-47.405	260.875	-98.506	104.419	42.353	123.499	-242.159	249.143	-5.569	117.243	-99.934	109.257	110.081	63.562	39.603	68.265	-70.523	31.85	-23.47	108.726	-58.277	13.832	-58.092	52.784	24.878	166.422	-46.493	47.706	2.275	79.624	-65.824	113.623	-85.096	55.068	2.724	47.558	-22.204	58.538	5.91273	76.0851	-78.3373	152.539	41.4619	86.6934	-30.1779
484	38.2518	53.1599	11.284	78.988	-47.102	260.206	-98.935	104.206	42.286	122.864	-243.531	250.429	-8.615	120.013	-99.82	109.204	110.91	61.404	39.796	68.613	-68.248	31.85	-24.714	106.583	-58.815	13.994	-58.068	52.188	25.267	165.171	-45.482	47.957	4.55	81.899	-65.271	112.82	-86.141	56.437	3.233	46.599	-21.8059	60.7061	6.34725	74.8612	-79.1131	152.505	40.2402	89.1868	-30.2507
485	40.495	57.1867	9.672	78.988	-46.756	259.943	-99.526	104.462	40.807	121.81	-244.373	250.305	-7.763	119.921	-99.332	113.984	111.999	61.411	38.666	70.579	-70.523	31.85	-19.706	110.781	-58.587	13.801	-58.174	52.608	25.123	164.977	-45.901	48.904	4.55	79.624	-64.876	112.565	-85.584	55.575	5.668	46.564	-20.4477	60.3421	5.51005	76.2512	-79.8821	153.619	41.6439	87.3532	-30.0141
486	40.8112	55.4691	9.672	80.6	-46.938	259.758	-99.966	104.746	40.195	123.805	-245.948	250.518	-5.616	119.733	-99.891	112.253	112.46	60.639	38.877	69.891	-68.248	31.85	-22.121	104.655	-58.959	13.727	-58.084	52.784	24.12	163.124	-45.889	49.841	2.275	79.624	-64.971	111.945	-86.196	55.458	5.165	45.677	-20.8777	61.748	7.44153	77.1248	-79.9117	153.335	39.8011	87.7149	-32.239
487	40.2152	55.2438	9.672	80.6	-45.764	259.894	-99.711	104.803	40.762	125.373	-246.395	250.402	-8.4	118.291	-99.996	110.269	113.428	60.781	38.7	71.964	-70.523	31.85	-22.36	108.721	-60.603	13.316	-57.833	52.2	23.881	162.928	-45.375	51.286	6.825	77.349	-64.852	113.546	-85.843	55.786	5.295	45.55	-20.7321	61.7344	7.21858	75.1319	-80.6146	153.221	42.861	88.5225	-25.5756
488	38.1881	55.0322	11.284	78.988	-45.635	259.305	-100.361	105.496	38.666	124.675	-247.797	251.26	-9.997	117.37	-100.044	111.833	112.44	60.347	39.364	69.421	-70.523	31.85	-18.166	111.828	-59.082	15.092	-57.915	51.919	25.032	162.29	-46.519	51.356	4.55	79.624	-66.699	113.555	-85.838	56.088	5.426	47.798	-18.8233	62.9288	7.0161	76.6311	-82.6803	152.941	39.0481	84.9189	-28.3055
489	40.3107	56.6134	11.284	80.6	-43.65	258.075	-99.635	104.829	39.051	122.394	-247.498	252.76	-8.442	118.654	-100.855	115.202	114.118	60.122	38.608	71.006	-70.523	29.575	-18.478	115.493	-58.09	15.309	-56.858	51.553	25.512	161.793	-45.939	51.396	2.275	79.624	-66.061	112.996	-85.962	55.836	5.959	47.575	-20.5341	62.2463	7.44835	77.7072	-81.5223	152.464	38.6159	85.7243	-26.6493
490	40.9272	56.329	11.284	80.6	-43.606	257.406	-100.815	104.691	38.694	121.524	-248.095	254.696	-9.403	118.477	-100.34	111.224	116.133	60.441	38.822	68.755	-70.523	29.575	-14.47	114.892	-59.483	13.848	-57.293	52.042	26.029	162.426	-45.818	51.995	2.275	81.899	-66.716	112.944	-85.798	55.903	6.087	47.669	-18.407	62.9674	5.0505	76.9974	-81.8977	150.646	37.881	84.9667	-34.8939
491	38.2905	52.8437	11.284	78.988	-42.373	256.29	-101.018	104.356	38.553	122.993	-247.698	256.327	-10.187	116.313	-100.89	113.19	118.101	61.259	38.532	69.994	-70.523	31.85	-11.764	117.885	-59.46	14.217	-57.455	52.063	26.149	162.442	-46.154	52.609	0	84.174	-67.012	113.518	-87.909	55.599	5.255	49.668	-17.5334	64.1732	7.76685	78.7036	-81.7225	149.256	41.1411	86.3567	-29.1427
492	41.107	56.6657	9.672	80.6	-41.667	255.967	-101.174	104.406	37.831	122.044	-247.91	255.84	-7.137	120.187	-100.332	111.344	118.44	61.682	38.109	70.069	-70.523	31.85	-13.365	118.504	-61.332	14.061	-57.187	51.781	26.652	162.503	-46.373	51.52	0	81.899	-68.188	113.784	-88.303	56.382	4.784	50.219	-18.3661	64.3051	6.15843	75.2343	-83.3651	148.589	39.8398	86.359	-27.3046
493	38.6659	54.6364	9.672	78.988	-40.995	255.349	-100.902	103.88	38.007	121.147	-246.339	256.587	-10.616	118.171	-100.967	113.056	119.418	61.745	37.211	73.166	-70.523	31.85	-14.28	115.607	-60.245	14.308	-57.234	51.831	28.417	161.26	-45.478	52.248	2.275	84.174	-67.475	113.208	-86.637	55.651	5.067	50.338	-17.2149	64.0503	7.21858	77.6003	-84.6869	147.222	39.105	85.4467	-32.5416
494	38.5681	56.0992	9.672	78.988	-41.245	254.561	-101.194	103.217	36.665	120.213	-248.187	261.049	-8.109	120.193	-101.601	110.574	119.839	61.314	37.517	69.391	-72.798	31.85	-11.101	118.239	-62.792	13.208	-57.294	50.833	28.704	159.711	-45.01	51.079	2.275	81.899	-68.173	113.309	-85.639	55.017	3.463	49.834	-16.7576	62.5124	7.38693	76.1556	-83.8201	145.525	42.2081	85.333	-30.0846
495	39.7534	55.3758	9.672	80.6	-40.472	254.38	-102.316	103.158	36.169	119.891	-249.744	266.793	-5.978	119.436	-100.132	111.124	120.7	62.018	37.555	70.471	-70.523	29.575	-10.693	119.24	-61.666	13.573	-56.944	50.57	29.136	160.213	-44.854	51.005	4.55	81.899	-67.99	112.615	-85.403	54.889	1.447	49.765	-14.626	61.6388	7.18218	76.6812	-85.788	144.947	40.3994	84.4025	-26.8564
496	41.3072	59.1341	9.672	80.6	-40.806	254.831	-102.716	103.376	34.933	118.765	-250.601	269.601	-8.104	120.886	-100.234	109.972	121.335	62.326	37.246	70.276	-70.523	29.575	-11.73	117.785	-62.23	13.625	-56.857	50.861	27.995	160.848	-43.969	51.889	4.55	79.624	-67.265	112.072	-85.216	55.336	-0.243	49.104	-16.6303	60.7766	8.4266	75.0795	-84.2956	145.8	41.5461	82.5393	-29.4521
497	40.4472	56.2949	9.672	80.6	-40.449	254.069	-103.145	103.163	35.546	118.54	-250.292	272.439	-4.59	121.614	-100.31	110.964	122.306	61.102	37.719	72.329	-70.523	29.575	-7.806	118.702	-59.58	17.586	-55.799	51.539	27.924	162.421	-44.986	51.631	4.55	79.624	-66.537	113.342	-85.101	55.073	4.103	53.283	-14.4326	59.2751	7.80553	74.5472	-87.6262	144.014	41.835	83.133	-28.2328
498	38.5408	55.5919	9.672	80.6	-39.522	253.838	-103.691	103.223	36.127	120.171	-249.683	275.745	-4.969	119.409	-100.87	114.552	123.138	61.694	37.226	75.533	-70.523	29.575	-10.393	118.803	-60.216	11.162	-55.245	50.519	27.288	158.951	-44.274	50.954	6.825	79.624	-66.772	112.674	-83.137	54.385	0.462	50.984	-13.5181	57.9647	7.22085	75.5277	-87.9083	142.654	34.6005	78.3692	-19.9972
499	41.1343	59.2933	9.672	80.6	-39.188	253.971	-103.469	102.572	36.589	121.597	-248.912	277.365	-2.435	119.666	-101.275	111.755	124.821	61.985	37.552	77.316	-72.798	29.575	-7.552	119.753	-59.825	12.001	-55.335	50.537	25.8	157.818	-43.724	51.288	4.55	79.624	-65.584	113.192	-81.051	54.531	-0.491	53.231	-14.5532	58.9293	7.49613	75.2343	-88.7387	143.871	40.0218	79.8935	-22.6067
500	39.5236	58.3515	8.06	78.988	-40.283	253.338	-103.763	102.441	35.894	121.723	-246.586	278.383	-6.456	115.682	-101.354	112.524	126.023	62.542	37.404	77.622	-70.523	29.575	-6.003	119.789	-60.133	10.257	-55.309	51.013	24.103	157.015	-43.922	52.072	9.099	81.899	-65.782	114.369	-81.295	55.398	-0.421	53.582	-14.6464	59.9349	8.08535	75.1728	-87.8923	142.547	43.6959	81.627	-26.2785
501	41.6575	59.6732	9.672	78.988	-39.827	253.505	-103.617	102.444	34.776	122.474	-244.564	279.106	-6.716	118.449	-101.742	110.665	128.24	62.268	37.913	74.089	-70.523	31.85	-4.152	118.894	-58.806	11.977	-54.968	50.216	22.901	156.956	-44.749	52.136	9.099	79.624	-66.294	112.991	-80.441	55.887	-2.134	53.154	-13.3338	60.1828	8.3265	74.7224	-87.8514	141.523	44.2169	83.265	-30.2871
502	39.0436	55.9809	9.672	80.6	-40.069	253.6	-104.098	102.758	32.639	123.378	-244.411	278.263	-3.198	119.517	-99.62	113.737	129.137	61.759	38.567	70.546	-70.523	31.85	-2.754	120.53	-59.935	12.302	-55.012	50.494	21.833	156.709	-44.967	53.053	6.825	79.624	-65.925	113.552	-80.386	55.75	-2.821	52.903	-12.7878	60.6515	5.45773	74.7952	-88.4292	142.592	38.6909	82.2094	-28.7856
503	39.0936	57.8805	9.672	80.6	-38.938	252.942	-103.052	102.933	32.272	124.123	-244.502	278.794	-8.194	115.895	-100.722	113.082	130.884	62.7	38.518	68.369	-72.798	29.575	-1.433	120.148	-62.501	13.033	-54.931	49.924	22.193	157.911	-44.851	52.234	6.825	79.624	-64.868	111.45	-80.91	55.079	-5.464	51.927	-13.4657	59.7051	7.46655	73.6531	-89.2983	143.05	38.9548	80.585	-27.093
504	41.0751	56.1516	9.672	80.6	-39.823	253.493	-103.673	103.09	30.908	125.188	-243.437	277.186	-7.39	114.396	-99.831	112.081	130.885	62.542	38.081	70.447	-72.798	29.575	-1.477	121	-62.396	10.6	-54.468	49.472	21.591	154.999	-45.208	52.384	9.099	77.349	-64.204	111.852	-80.373	55.253	-5.472	51.643	-12.2691	60.5764	8.6905	74.2537	-88.3837	142.149	41.4027	81.0355	-28.8629
505	38.9071	58.0171	11.284	80.6	-39.791	252.946	-103.944	102.261	30.434	125.05	-242.284	277.111	-6.25	117.356	-101.663	111.293	131.898	61.837	38.322	77.134	-72.798	29.575	-2.951	122.764	-60.859	12.151	-55.073	50.242	22.702	153.633	-44.493	52.566	6.825	79.624	-64.036	111.675	-80.868	55.476	-6.47	50.689	-12.9561	60.3921	9.40485	75.5732	-89.6304	140.552	35.6788	80.0254	-24.5154
506	36.6389	54.8229	9.672	82.212	-39.999	252.367	-104.685	102.359	29.446	125.623	-240.125	276.411	-7.867	116.665	-99.466	112.304	132.883	61.51	38.993	70.222	-72.798	27.3	-2.564	123.444	-64.581	11.325	-54.687	50.86	22.306	154.639	-43.479	52.639	9.099	77.349	-63.805	111.906	-79.863	55.449	-7.32	49.693	-13.0039	60.4831	8.1172	76.5378	-90.0217	140.575	36.7162	80.2984	-28.5808
507	38.5817	58.1809	9.672	82.212	-39.374	252.915	-105.398	102.709	28.454	127.632	-237.899	276.029	-3.782	117.348	-100.299	110.718	133.293	61.707	38.856	69.645	-72.798	27.3	-6.076	124.996	-62.001	13.091	-54.321	50.367	22.97	154.385	-42.447	52.029	6.825	79.624	-63.656	112.299	-80.079	54.438	-11.475	48.622	-10.4468	58.3788	8.56765	73.6895	-89.8625	139.476	40.6065	82.239	-23.337
508	38.6022	54.8776	8.06	80.6	-38.168	252.283	-104.658	102.681	29.817	128.451	-238.185	275.248	-7.702	119.144	-99.43	112.697	133.713	59.307	38.156	71.088	-72.798	27.3	-3.71	123.473	-59.048	13.485	-53.932	51.065	22.287	154.718	-41.952	52.459	11.374	77.349	-63.133	112.627	-79.999	55.195	-10.979	47.489	-8.49485	56.0901	8.47665	74.3243	-90.7247	138.061	38.9207	82.5211	-20.955
509	39.9081	58.6336	8.06	82.212	-38.37	252.69	-104.654	103.997	28.412	130.766	-236.468	275.358	-5.546	118.948	-101.288	115.187	133.697	59.013	39.072	70.854	-72.798	27.3	-3.153	123.483	-63.013	12.596	-54.269	51.367	23.912	155.242	-42.696	52.555	9.099	81.899	-63.96	112.274	-78.356	54.566	-10.06	48.916	-10.7698	53.9311	8.02848	71.8832	-91.6051	137.86	34.0135	81.6361	-23.7578
510	39.9649	58.1809	8.06	78.988	-38.127	251.805	-104.758	103.352	28.326	131.646	-236.98	275.447	-6.702	118.948	-97.928	112.379	135.271	57.973	38.708	71.601	-75.073	29.575	-4.769	121.172	-60.183	15.367	-54.51	52.075	23.164	156.161	-42.027	53.887	6.825	81.899	-63.748	112.659	-76.711	55.059	-10.16	48.23	-8.41067	53.7901	9.71653	74.8065	-91.9987	137.851	33.5722	83.1012	-26.2444
511	38.4498	56.602	8.06	80.6	-37.41	252.367	-104.259	103.898	28.943	131.833	-235.671	275.324	-8.863	120.596	-97.587	111.558	135.983	57.425	38.721	72.706	-75.073	27.3	-0.153	122.514	-60.763	13.674	-54.376	51.135	23.028	157.15	-39.984	54.411	11.374	79.624	-63.599	112.117	-76.542	54.15	-12.782	46.623	-12.3919	53.4443	9.40485	73.7168	-93.7095	136.991	25.5801	78.8128	-21.4055
512	42.7996	60.7152	9.672	80.6	-35.925	251.535	-104.447	103.598	29.524	131.869	-235.88	275.359	-8.993	120.714	-97.439	112.243	136.532	55.902	38.398	74.529	-75.073	27.3	-3.217	123.84	-60.816	14.384	-55.002	51.244	22.27	156.472	-39.59	54.673	11.374	81.899	-63.224	112.456	-75.439	54.419	-11.64	47.127	-8.6632	54.0517	10.1192	74.8907	-94.0348	136.668	21.6489	80.0459	-24.3152
513	40.9204	59.2296	9.672	80.6	-35.57	251.588	-105.353	103.807	29.331	132.241	-235.581	274.06	-8.7	120.807	-98.599	113.434	137.712	55.744	38.337	76.532	-75.073	27.3	-4.069	125.312	-61.97	14.243	-56.172	51.532	23.626	156.659	-38.332	54.907	6.825	79.624	-63.009	112.931	-73.528	53.964	-13.267	46.073	-9.55045	55.0254	8.8998	73.9239	-93.5912	136.266	28.8334	82.9169	-18.4389
514	37.4374	56.2698	11.284	82.212	-35.629	252.414	-106.171	103.876	29.445	133.416	-235.995	273.415	-5.893	118.739	-99.784	111.967	138.617	55.58	38.933	78.834	-75.073	27.3	-4.586	126.473	-61.617	13.022	-56.621	51.762	23.554	155.677	-38.161	55.065	11.374	79.624	-63.392	112.424	-71.751	54.77	-14.877	48.388	-8.72007	56.4814	9.99408	74.3606	-94.5422	136.58	27.6504	82.2822	-24.843
515	41.6189	60.0077	9.672	80.6	-36.188	252.341	-106.986	103.743	28.248	134.003	-236.273	272.694	-9.018	122.334	-99.048	112.462	138.85	55.224	38.632	80.067	-75.073	27.3	-5.281	125.529	-60.195	14.13	-57.096	52.485	21.836	155.817	-38.535	54.879	13.649	81.899	-62.295	113.128	-71.417	54.545	-14.823	48.042	-10.8699	56.3586	9.3821	73.7532	-95.368	137.681	19.9882	78.8356	-21.6307
516	41.7508	58.1831	8.06	82.212	-35.687	252.619	-106.576	104.331	28.439	133.144	-234.062	271.615	-8.143	118.013	-98.116	110.767	139.709	54.405	38.378	79.793	-77.348	27.3	-3.605	125.417	-61.874	12.806	-57.811	51.824	21.398	155.929	-38.366	56.109	13.649	84.174	-62.25	113.193	-69.833	54.237	-14.362	47.12	-9.17963	60.7334	10.506	75.0591	-96.9491	137.135	29.4931	82.7054	-23.3347
517	37.0575	54.7638	9.672	82.212	-34.906	251.99	-106.202	104.272	28.138	132.385	-235.16	272.705	-7.19	119.454	-97.31	113.313	139.721	53.617	38.18	80.791	-77.348	25.025	-5.082	126.516	-61.878	17.994	-58.635	50.994	20.081	156.405	-38.18	55.108	11.374	79.624	-62.882	111.579	-68.769	54.699	-13.864	48.188	-6.97288	60.6287	8.1536	73.8419	-97.7226	136.557	20.3703	81.2016	-17.6608
518	40.0992	58.5403	8.06	83.824	-34.61	252.436	-105.668	104.024	28.726	132.683	-236.01	272.041	-5.546	122.353	-98.03	112.724	140.993	52.76	38.504	77.862	-77.348	27.3	-6.192	123.725	-60.608	12.807	-58.493	51.181	20.062	157.231	-39.405	55.073	11.374	84.174	-62.296	112.626	-69.029	54.075	-14.088	47.785	-6.79087	61.8709	9.02038	75.0386	-95.8981	138.882	17.3537	78.1645	-16.6826
519	42.0579	61.4273	8.06	80.6	-35.495	252.967	-106.084	103.889	27.62	132.972	-235.716	269.502	-8.393	122.595	-96.723	111.587	142.369	51.693	38.187	79.59	-77.348	27.3	-7.705	121.905	-61.346	19.873	-57.937	51.327	20.403	157.206	-39.728	55.793	11.374	84.174	-62.564	112.343	-68.268	54.548	-14.412	46.569	-6.28127	61.1679	10.0123	75.8257	-96.6898	138.495	15.7658	78.533	-17.3401
520	39.105	57.6303	6.448	78.988	-34.402	253.367	-105.509	104.403	28.379	133.588	-236.528	268.221	-6.473	120.64	-96.911	111.903	142.445	50.946	37.617	78.885	-77.348	27.3	-7.039	123.583	-59.594	15.074	-57.43	51.325	22.383	157.349	-40.483	56.711	11.374	86.449	-61.955	112.084	-67.429	54.561	-13.856	47.165	-7.23222	63.1039	11.4751	76.9974	-98.4119	137.142	16.6371	76.1579	-17.0261
521	39.4781	57.6303	8.06	82.212	-34.706	253.067	-106.852	103.64	27.059	133.434	-237.084	268.144	-4.722	118.806	-96.447	111.429	143.773	50.5	37.202	79.063	-77.348	27.3	-4.369	121.242	-60.28	15.271	-56.638	50.998	23.392	157.102	-40.318	56.976	13.649	86.449	-63.001	112.213	-67.686	54.907	-12.206	47.444	-5.09145	61.9915	11.1748	74.7588	-97.7181	138.284	16.4869	78.4738	-17.77
522	38.989	58.9976	8.06	80.6	-33.821	253.801	-106.656	103.863	27.249	134.21	-235.511	265.974	-1.559	120.914	-98.436	110.82	144.237	50.162	36.301	76.466	-77.348	27.3	-3.678	124.212	-63.007	16.437	-56.185	50.784	23.168	158.9	-40.874	57.337	13.649	86.449	-61.571	113.386	-63.711	53.908	-13.187	45.877	-5.46	63.3724	10.5788	75.2115	-98.2254	137.676	20.2862	77.83	-14.8558
523	38.4839	58.7337	6.448	80.6	-33.229	252.617	-107.109	103.876	25.655	133.908	-235.444	263.74	-4.784	117.743	-99.499	112.951	145.391	50.128	37.002	78.937	-77.348	27.3	-6.15	123.227	-59.068	16.091	-55.704	51.14	24.482	159.684	-41.023	58.35	13.649	90.999	-61.345	113.851	-63.658	54.99	-13.383	47.798	-5.39857	63.1335	11.7777	76.3854	-99.1149	137.49	16.1684	78.9607	-21.3577
524	39.5645	59.8598	6.448	80.6	-33.59	252.712	-106.982	103.51	25.463	134.582	-234.926	262.373	0.298	120.043	-100.117	112.42	146.042	50.039	36.704	79.144	-77.348	27.3	-5.941	118.987	-62.015	15.224	-55.432	51.053	24.373	158.693	-41.553	58.736	9.099	88.724	-61.706	113.65	-63.071	55.387	-15.994	46.343	-5.59422	61.2976	8.99535	76.7198	-100.282	143.653	17.7769	78.4898	-19.2101
525	39.5372	59.6528	8.06	80.6	-33.315	252.536	-107.575	102.728	25.256	134.728	-234.744	260.59	-4.026	118.956	-99.134	112.525	148.287	49.633	36.809	77.159	-75.073	27.3	-3.267	121.954	-59.304	19.382	-56.305	50.629	22.297	160.755	-41.094	57.699	9.099	88.724	-62.419	113.413	-60.553	55.877	-14.982	46.965	-4.4408	61.3613	10.3717	77.1293	-98.7373	138.306	12.3419	77.4888	-16.5574
526	41.9897	62.335	6.448	80.6	-31.994	252.245	-106.898	102.499	25.966	134.967	-234.136	258.392	-5.02	117.827	-99.652	111.838	149.145	48.604	37.513	77.474	-77.348	27.3	-4.783	119.956	-60.209	15.947	-55.701	50.542	22.028	162.288	-41.802	58.051	6.825	88.724	-61.153	114.636	-60.542	55.864	-15.015	45.1	-1.91327	58.6677	9.36163	76.6038	-101.758	145.338	15.1492	78.9493	-20.5364
527	39.7351	61.9551	8.06	80.6	-31.533	251.812	-106.759	102.005	26.466	135.244	-234.124	256.861	-1.74	116.276	-99.088	112.768	150.684	47.926	37.179	77.36	-77.348	27.3	-6.439	116.175	-60.221	18.804	-55.981	50.887	22.286	162.012	-42.153	58.532	6.825	88.724	-62.099	114.391	-63.181	55.058	-14.698	45.819	-2.39102	59.8143	10.7221	76.5401	-101.076	136.819	16.2458	77.6639	-23.6691
528	42.2854	60.9632	9.672	80.6	-31.226	251.322	-106.275	101.901	26.206	135.747	-233.685	256.401	-4.061	118.555	-99.051	114.171	151.01	47.746	36.846	77.756	-77.348	27.3	-6.712	122.438	-59.57	17.398	-55.451	50.303	22.583	160.794	-42.215	59.159	9.099	90.999	-62.1	113.648	-63.335	54.841	-17.855	42.363	-1.4378	60.0372	9.68923	74.5472	-101.9	142.213	16.5734	78.2714	-26.3354
529	40.6861	61.5842	9.672	80.6	-31.02	250.553	-105.131	101.396	25.291	135.92	-233.93	255.443	-6.054	118.866	-99.75	111.585	152.74	45.716	37.761	77.945	-75.073	25.025	-8.749	114.303	-59.602	19.229	-55.537	50.278	21.049	162.051	-41.865	59.918	11.374	93.273	-61.489	115.051	-63.34	55.877	-16.344	41.735	-3.16907	61.8914	10.4218	76.8631	-102.382	143.093	18.6027	78.8083	-21.2235
530	41.0729	62.4715	8.06	80.6	-31.442	249.832	-105.711	101.676	24.666	137.077	-234.289	253.145	-3.997	120.114	-100.302	112.764	153.242	45.645	37.011	77.08	-77.348	27.3	-7.069	116.125	-57.931	18.723	-55.126	49.751	22.392	159.97	-41.429	60.546	4.55	90.999	-61.526	116.184	-61.086	55.487	-17.201	41.38	-4.25652	61.6002	9.6187	75.5482	-105.665	147.725	22.1767	77.2817	-17.811
531	39.9376	60.6015	8.06	80.6	-30.988	248.565	-104.83	101.435	23.632	137.028	-234.967	251.954	-4.935	119.999	-99.168	110.49	154.666	44.863	37.106	75.641	-77.348	25.025	-8.201	119.589	-60.02	17.235	-55.138	47.922	22.325	160.472	-41.31	61.137	4.55	88.724	-62.372	115.816	-58.996	55.22	-16.584	41.634	-3.51942	60.5992	10.92	75.1637	-105.403	146.947	18.5071	79.4021	-14.7375
532	39.9991	58.3697	8.06	80.6	-30.128	248.174	-103.697	102.003	23.375	137.671	-235.692	250.533	-4.693	119.39	-100.662	111.979	155.141	43.891	36.792	76.416	-77.348	25.025	-8.944	114.682	-58.661	15.196	-54.77	47.607	21.683	160.307	-41.518	61.625	0	93.273	-61.816	115.581	-59.451	54.423	-18.021	40.605	-4.004	63.2655	9.78478	77.2044	-105.041	146.08	20.1724	81.4473	-18.2842
533	41.1275	60.6879	8.06	80.6	-29.992	247.845	-103.412	101.438	22.69	137.253	-235.803	249.855	-4.91	119.663	-98.615	112.581	156.515	44.278	36.482	76.948	-77.348	27.3	-13.171	116.12	-59.684	17.124	-54.578	46.698	21.528	159.885	-41.461	62.374	6.825	90.999	-60.988	115.908	-58.48	56.242	-18.677	42.671	-4.87305	62.4874	9.62553	78.1508	-107.423	148.962	25.6529	81.9933	-20.6297
534	41.769	62.7491	8.06	78.988	-29.433	248.055	-103.974	101.607	22.543	138.492	-236.666	249.289	-0.81	119.02	-98.153	114.667	157.24	43.218	36.664	75.41	-79.623	27.3	-8.644	115.969	-59.304	16.32	-54.299	46.883	22.025	158.814	-42.551	62.599	0	93.273	-61.263	115.804	-58.457	55.717	-18.668	41.771	-3.28282	63.2245	9.88943	76.4036	-106.877	148.048	21.8354	80.5577	-19.8107
535	42.0033	61.6843	9.672	80.6	-29.027	247.894	-103.243	101.294	22.548	138.193	-238.246	248.5	-2.923	119.837	-98.344	110.041	158.38	43.261	37.671	77.907	-79.623	27.3	-13.991	116.493	-59.739	12.899	-54.529	47.708	22.495	158.883	-42.028	62.141	2.275	93.273	-59.975	115.963	-57.294	55.517	-19.866	41.054	-5.09827	62.5011	10.3854	76.4832	-109.111	152.257	20.2157	80.6101	-20.3271
536	40.9728	61.1588	8.06	80.6	-29.01	247.131	-103.818	101.8	22.486	138.155	-239.954	248.344	-3.477	121.111	-98.394	112.231	158.588	42.152	36.218	76.106	-79.623	27.3	-11.569	117.959	-61.333	15.316	-54.245	49.303	23.041	159.037	-42.263	62.829	2.275	93.273	-60.676	116.529	-57.438	55.533	-19.801	41.646	-3.98807	63.0334	9.06133	77.1202	-109.453	150.555	23.1208	80.2233	-18.6618
537	37.2008	57.6167	9.672	78.988	-29.14	246.553	-103.157	101.382	21.605	137.911	-241.377	248.8	-1.248	122.328	-99.479	110.05	160.685	41.28	36.603	76.376	-81.898	25.025	-17.327	117.341	-59.424	14.619	-53.796	48.584	22.024	160.845	-43.78	62.648	4.55	90.999	-59.869	117.586	-56.429	56.31	-21.045	41.937	-4.38847	64.4689	8.70188	78.5876	-108.579	148.073	20.2498	80.03	-18.4912
538	41.3709	62.3851	8.06	78.988	-30.018	246.541	-103.401	100.933	20.664	138.443	-243.601	248.924	-1.949	119.383	-98.737	112.597	162.185	40.378	36.988	78.482	-79.623	25.025	-13.058	118.991	-58.981	15.687	-53.386	48.438	23.546	160.033	-43.982	63.734	2.275	90.999	-60.675	117.132	-55.97	55.806	-21.178	41.746	-4.50677	63.1062	9.47083	76.8791	-109.416	152.687	23.3597	82.2868	-23.5986
539	39.3734	60.1464	8.06	78.988	-29.31	246.461	-103.504	101.471	20.018	138.118	-244.645	248.341	-3.809	119.154	-101.295	111.458	162.845	39.503	36.647	75.697	-79.623	20.475	-16.845	117.741	-60.168	14.1	-52.977	49.279	24.704	159.695	-43.696	63.949	-2.275	95.548	-61.042	116.966	-54.997	56.166	-20.667	41.345	-4.10182	64.0845	8.554	76.9177	-109.227	149.326	22.9684	82.6485	-22.8228
540	44.0804	63.1722	6.448	78.988	-30.067	246.957	-104.149	102.307	19.371	138.876	-246.189	249.761	-1.881	120.134	-99.591	111.08	164.435	39.211	36.244	73.829	-81.898	20.475	-18.694	117.749	-60.627	12.424	-53.121	48.999	24.153	159.523	-44.018	63.263	0	93.273	-61.436	116.38	-54.388	55.254	-20.705	41.973	-3.57402	64.387	8.37655	76.6812	-109.623	150.878	25.3526	82.4096	-22.0971
541	39.5031	58.4948	9.672	78.988	-30.261	246.386	-103.971	101.79	19.46	137.399	-246.559	249.953	0.652	116.781	-101.045	112.695	164.99	38.793	36.356	75.033	-81.898	22.75	-14.5	120.279	-60.415	17.019	-52.333	49.811	25.47	159.834	-44.071	63.482	0	90.999	-59.703	118.448	-54.307	55.427	-22.453	43.291	-2.72317	62.3213	7.01155	76.6288	-110.701	150.946	26.0692	82.3777	-19.5604
542	41.4141	60.0395	8.06	78.988	-30.96	245.954	-105.197	100.684	18.952	136.239	-246.568	250.082	-2.858	117.533	-100.677	112.563	165.901	38.142	35.855	76.271	-81.898	22.75	-18.146	115.324	-62.091	15.088	-52.329	47.557	25.049	159.611	-44.236	64.266	0	93.273	-56.138	122.256	-53.884	54.55	-21.764	42.834	-2.49795	61.3135	8.7269	77.5411	-110.526	149.176	22.9343	82.7372	-20.3362
543	39.8011	61.4091	8.06	77.376	-30.48	246.161	-105.873	100.081	18.528	135.835	-245.495	250.427	-0.698	119.713	-99.11	112.742	166.685	38.415	35.314	77.371	-81.898	22.75	-17.188	124.444	-59.855	16.21	-52.392	48.457	24.8	158.43	-43.215	64.585	-2.275	93.273	-57.524	120.191	-54.272	54.826	-20.764	41.288	-3.26007	61.2589	7.80325	75.4595	-114.166	150.175	23.7192	83.9521	-21.3281
544	41.3026	59.5254	9.672	75.764	-30.129	245.038	-105.747	99.967	19.965	134.319	-244.678	251.834	-2.591	117.562	-100.65	111.402	166.551	38.334	36.257	76.549	-84.173	20.475	-21.566	123.095	-63.348	18.718	-53.326	48.948	24.894	159.024	-43.675	65.499	-4.55	93.273	-59.056	118.745	-54.282	54.932	-23.179	41.817	-4.5773	62.294	7.11165	75.6688	-114.116	151.167	22.9752	82.4096	-24.7747
545	41.1479	60.4718	8.06	75.764	-28.655	244.549	-104.678	100.094	21.735	132.716	-244.29	252.743	-3.118	116.507	-101.389	113.556	167.331	37.743	36.143	77.11	-84.173	20.475	-17.358	120.57	-62.705	16.347	-53.038	48.799	25.418	158.438	-43.97	64.293	-11.375	95.548	-57.524	120.676	-56.092	54.056	-23.257	42.284	-4.68195	61.8663	7.12985	76.8768	-114.671	148.262	22.6613	81.7589	-17.6859
546	41.0592	57.8897	6.448	77.376	-27.964	244.505	-104.063	99.587	22.527	132.441	-244.297	253.879	-4.214	121.743	-98.352	109.125	167.548	36.566	36.289	74.58	-84.173	20.475	-16.978	123.202	-62.766	16.108	-53.885	49.147	26.32	159.459	-44.12	64.659	-9.1	95.548	-58.36	119.611	-56.342	54.292	-22.024	40.974	-6.42005	62.7923	9.19555	76.4832	-116.391	146.351	19.2874	79.3861	-28.8015
547	41.446	63.3497	9.672	77.376	-27.651	245.102	-104.463	99.664	22.641	132.133	-243.135	254.686	-3.372	119.576	-97.845	111.593	168.12	35.504	35.048	75.35	-84.173	22.75	-18.731	124.772	-62.629	19.13	-53.923	48.491	27.163	160.218	-44.284	64.362	-2.275	93.273	-57.313	121.294	-56.832	54.921	-22.612	42.211	-8.17635	64.8739	8.47665	78.9152	-117.122	145.504	22.1335	81.1743	-19.7675
548	40.5337	61.3477	9.672	77.376	-27.374	244.711	-103.493	99.932	21.953	132.72	-241.424	257.227	-6.484	120.946	-99.273	112.853	170.372	34.804	35.561	76.892	-86.448	22.75	-20.018	127.889	-63.915	15.217	-55.041	48.638	27.538	159.7	-43.996	64.261	-11.375	97.823	-56.171	122.693	-57.625	54.527	-22.301	42.708	-7.27545	63.0061	9.99863	77.4478	-118.432	147.34	25.0933	84.3365	-29.3975
549	41.1639	60.5059	9.672	75.764	-27.771	244.551	-103.422	100.496	21.625	132.115	-239.083	256.531	-7.321	117.903	-98.325	111.617	171.419	33.962	36.817	77.445	-86.448	25.025	-21.241	126.803	-62.183	17.967	-55.18	47.375	27.67	161.006	-44.16	63.95	-2.275	93.273	-54.549	124.973	-57.485	54.183	-24.184	42.964	-7.0889	63.5407	9.02948	77.987	-118.061	146.672	27.1681	86.7389	-27.8346
550	41.4846	62.4078	9.672	75.764	-27.313	244.083	-103.175	100.137	21.477	130.783	-237.772	257.482	-2.71	119.38	-98.628	112.104	170.737	32.515	36.248	78.531	-86.448	22.75	-18.346	126.335	-63.043	15.57	-54.945	47.227	27.866	161.829	-44.534	64.018	-2.275	93.273	-54.767	124.305	-58.92	53.859	-24.459	42.969	-7.93975	63.0016	9.7097	78.5398	-122.688	156.5	22.2449	84.084	-28.9039
551	41.0296	62.0984	8.06	75.764	-28.229	244.2	-103.832	100.014	20.951	130.402	-235.479	257.2	-3.328	117.982	-100.272	112.141	171.533	31.976	37.823	79.135	-86.448	22.75	-17.181	129.842	-63.281	17.585	-54.542	47.69	28.134	161.563	-45.327	63.969	2.275	95.548	-53.715	126.552	-60.587	54.972	-23.784	44.102	-6.81363	62.8901	8.96123	79.3543	-122.142	155.79	21.6944	83.2309	-33.8406
552	41.1092	61.3135	9.672	77.376	-28.484	244.336	-104.372	99.848	20.178	129.747	-232.823	257.157	-4.408	117.968	-97.77	111.566	171.127	31.469	37.702	78.929	-88.723	22.75	-19.06	129.121	-62.435	18.189	-54.201	49.541	26.63	160.295	-45.51	63.58	4.55	95.548	-53.748	127.557	-61.689	54.615	-24.275	45.626	-7.189	62.6262	9.5277	79.5317	-120.955	151.743	22.3496	83.7905	-26.2944
553	41.81	61.88	9.672	78.988	-28.991	244.066	-104.354	99.146	19.91	128.813	-231.035	256.045	-3.484	120.888	-100.891	111.946	172.157	31.415	37.458	79.989	-86.448	22.75	-22.61	124.289	-61.797	17.94	-53.929	48.65	25.55	160.009	-45.306	63.553	2.275	90.999	-54.084	127.738	-61.084	54.288	-23.61	43.751	-5.38948	62.6171	9.49813	78.922	-120.946	153.244	24.2515	86.1429	-23.1208
554	40.2379	60.5992	9.672	77.376	-28.29	244.541	-103.433	99.038	21.134	129.606	-230.183	254.761	-3.88	124.65	-99.455	114.606	172.511	29.702	37.596	80.403	-88.723	22.75	-15.615	130.673	-63.26	15.239	-54.111	47.786	26.965	159.197	-45.112	62.67	6.825	93.273	-54.243	126.862	-61.934	55.465	-23.94	43	-3.93575	62.4328	10.0828	78.0029	-122.686	158.62	24.7907	86.2088	-24.7998
555	38.4361	59.398	9.672	77.376	-28.159	244.302	-103.447	98.892	21.754	128.614	-228.893	254.747	-4.078	122.005	-101.001	113.359	172.77	28.742	36.676	79.614	-88.723	25.025	-17.873	128.533	-62.899	17.043	-53.753	50.655	26.219	159.065	-44.977	64.615	4.55	90.999	-52.774	127.942	-61.8	55.102	-23.907	43.174	-4.64328	62.2986	9.41168	79.2701	-121.826	158.167	31.1584	90.0126	-27.3978
556	40.834	61.9027	11.284	77.376	-28.384	244.343	-104.499	98.926	21.579	129.283	-228.249	254.339	-5.058	119.282	-100.541	111.943	172.559	26.677	36.686	79.957	-88.723	27.3	-21.552	127.66	-63.088	18.048	-52.373	50.846	28.151	160.33	-44.832	64.104	4.55	90.999	-52.919	128.65	-62.43	54.557	-24.221	45.122	-4.06088	63.2632	9.47083	79.0904	-123.125	161.796	19.7789	82.3482	-22.7477
557	41.7645	60.3603	9.672	78.988	-28.15	244.147	-103.782	98.39	22.452	129.955	-229.03	255.36	-0.024	122.017	-100.702	112.489	173.334	26.59	36.139	81.181	-86.448	25.025	-24.749	125.786	-62.987	18.394	-53.083	51.764	27.912	161.613	-45.642	62.859	11.374	93.273	-53.845	128.342	-64.019	54.969	-22.499	43.795	-3.52398	61.8413	9.97815	79.5977	-120.634	159.384	18.3501	82.1434	-27.5775
558	40.5132	59.9553	9.672	77.376	-28.278	243.474	-103.803	97.706	22.619	129.681	-229.539	253.917	-1.574	121.563	-100.392	111.013	173.214	25.319	36.967	80.639	-88.723	25.025	-24.709	123.833	-63.044	17.116	-53.358	52.597	28.067	162.081	-45.87	63.31	4.55	93.273	-51.806	129.753	-66.157	54.873	-23.599	45.587	-2.67995	62.6876	9.7006	80.5213	-123.159	166.762	19.2579	84.0089	-29.6887
559	41.6484	63.1449	9.672	77.376	-28.268	243.712	-104.443	97.686	24.132	131.229	-230.215	254.496	-3.174	122.387	-99.082	112.181	174.614	25.209	36.674	81.229	-88.723	20.475	-22.436	128.627	-62.676	16.395	-53.754	51.985	28.731	162.703	-45.461	62.374	6.825	93.273	-53.688	130.961	-66.37	55.279	-23.627	44.776	-1.35135	61.8959	6.64983	82.0206	-121.323	163.236	13.8366	79.8798	-25.3208
560	41.8054	61.1975	9.672	77.376	-28.639	243.994	-103.824	97.955	24.125	131.226	-229.812	254.512	-1.702	121.632	-99.712	111.993	174.353	23.595	37.114	81.733	-90.998	20.475	-25.02	128.778	-62.694	17.796	-53.834	51.621	28.463	164.096	-45.543	62.332	6.825	90.999	-54.664	129.794	-68.358	55.323	-21.645	43.626	0.156975	62.3395	8.98398	79.0904	-122.964	169.296	12.0188	82.057	-28.1417
561	39.8011	57.9306	9.672	77.376	-28.795	244.226	-103.344	97.67	25.118	131.724	-231.341	253.869	-1.305	121.863	-100.48	111.855	175.652	21.874	36.403	82.212	-90.998	22.75	-20.873	130.524	-64.632	18.353	-53.459	51.144	29.472	165.191	-45.296	62.176	6.825	93.273	-55.21	130.095	-66.45	54.776	-19.477	43.262	-0.85995	63.5498	10.5469	80.7034	-122.286	167.975	14.7102	82.6803	-27.6231
562	41.1024	59.5641	9.672	77.376	-27.968	243.861	-103.053	97.379	26.594	132.993	-231.513	253.363	-0.376	118.593	-100.16	112.51	175.796	20.349	36.35	82.753	-88.723	22.75	-27.926	129.81	-64.265	16.475	-54.545	52.386	29.743	163.826	-45.319	60.6	6.825	95.548	-56.039	128.189	-65.502	53.703	-20.794	43.852	-2.38192	62.2394	9.73928	80.419	-120.598	162.171	12.9448	80.6283	-24.4494
563	41.8441	62.3623	9.672	77.376	-28.53	243.743	-103.385	97.067	27.342	133.401	-232.927	253.167	-0.913	121.062	-98.938	111.931	176.863	18.872	36.145	82.526	-88.723	22.75	-27.615	131.256	-64.99	17.882	-54.803	53.353	29.246	165.733	-44.828	59.839	9.099	93.273	-56.3	128.727	-65.77	55.713	-22.232	43.747	-0.5915	63.5521	9.01583	81.9501	-118.507	157.735	13.4088	78.26	-31.5747
564	42.2877	59.9053	11.284	78.988	-28.791	243.477	-103.754	97.351	27.755	133.896	-235.125	252.638	-3.05	121.52	-98.229	112.215	176.846	17.281	36.713	82.671	-90.998	25.025	-27.473	132.378	-63.502	19.851	-54.096	51.762	29.157	164.914	-44.449	58.716	6.825	90.999	-57.067	127.694	-63.243	54.249	-21.982	42.283	1.22395	64.5008	9.11365	80.7648	-119.139	159.134	12.2736	78.5739	-29.4089
565	40.7316	59.2956	9.672	78.988	-27.765	243.35	-102.145	97.036	29.375	134.568	-233.789	250.579	-0.486	122.58	-98.204	113.758	177.223	15.104	37.534	82.523	-88.723	22.75	-26.473	128.236	-62.897	21.242	-54.272	51.275	29.905	166.862	-43.851	58.744	11.374	97.823	-56.202	127.671	-59.416	54.84	-21.817	43.166	-0.01365	64.4371	9.84165	80.9263	-120.464	159.673	10.9405	78.4579	-29.5887
566	41.7622	62.1803	9.672	75.764	-26.733	243.106	-101.726	96.791	30.132	134.599	-234.336	251.099	0.411	122.651	-98.549	111.889	176.623	13.917	37.381	82.525	-88.723	25.025	-30.859	127.539	-63.174	17.754	-54.107	51.601	29.087	166.825	-43.397	58.27	9.099	90.999	-56.578	127.845	-58.046	54.603	-23.579	42.843	1.9656	63.3428	10.1351	83.0057	-122.208	162.178	10.7107	77.5183	-28.0189
567	40.3767	60.308	9.672	75.764	-27.974	243.327	-102.272	97.588	29.124	134.818	-233.975	250.018	-0.237	122.153	-99.563	113.727	176.588	12.264	37.81	83.657	-88.723	25.025	-28.496	129.271	-63.998	19.474	-54.316	51.905	26.77	167.507	-43.73	57.871	9.099	93.273	-55.993	128.383	-57.104	54.421	-21.955	42.622	2.37738	63.4543	10.2466	81.329	-111.616	132.537	11.3409	76.9997	-30.394
568	39.494	60.6629	9.672	77.376	-27.733	243.526	-101.7	97.304	30.2	134.828	-236.387	251.694	-0.23	123.285	-97.94	111.41	177.32	10.863	37.761	82.069	-88.723	25.025	-30.309	128.006	-65.381	19.011	-53.939	51.271	25.774	167.907	-43.646	57.38	9.099	90.999	-57.052	126.777	-54.668	55.759	-25.154	44.03	1.79725	64.6327	9.96677	83.2286	-109.628	128.931	8.14905	75.8348	-32.1935
569	38.3565	59.3024	9.672	77.376	-28.058	243.051	-101.652	97.075	30.761	135.066	-235.466	252.631	0.701	119.162	-97.699	113.5	177.376	9.013	38.383	83.316	-88.723	25.025	-28.977	127.913	-64.959	18.977	-54.141	52.434	23.933	168.396	-42.664	58.149	6.825	93.273	-56.569	127.777	-53.731	55.683	-24.165	40.048	1.3741	64.0981	9.31158	80.8398	-111.395	130.628	8.12175	78.301	-30.8172
570	39.1027	61.0451	8.06	77.376	-27.669	243.929	-101.42	97.531	32.325	135.862	-236.161	252.755	3.354	121.696	-99.427	111.257	177.337	8.323	38.28	81.335	-88.723	25.025	-31.034	125.78	-64.027	20.037	-53.922	53.021	24.802	166.957	-43.104	57.155	2.275	93.273	-56.304	128.14	-57.06	55.186	-24.635	40.685	1.16707	63.5862	10.7881	82.3982	-112.028	134.48	6.1243	77.9552	-25.3594
571	39.7351	59.3343	9.672	78.988	-27.359	243.209	-101.061	97.18	32.368	135.927	-236.44	253.225	1.268	121.257	-98.518	113.962	178.399	6.513	38.724	82.006	-88.723	27.3	-30.625	128.996	-65.005	20.016	-53.962	53	23.488	166.575	-44.021	57.348	4.55	93.273	-56.894	127.584	-56.597	55.325	-24.09	40.354	1.88143	64.064	9.30703	81.2789	-116.737	142.401	9.34115	76.4082	-28.2805
572	38.8843	59.6368	9.672	77.376	-27.236	243.671	-100.875	97.557	32.275	137.832	-236.167	255.251	-2.508	120.26	-99.986	113.811	178.944	5.084	39.278	82.144	-88.723	29.575	-36.58	127.554	-65.924	17.468	-54.275	52.302	23.373	165.578	-43.219	57.289	0	88.724	-56.887	129.175	-56.212	55.181	-26.283	40.596	1.51743	64.387	9.79843	80.7602	-114.223	136.088	6.5247	75.4185	-29.9731
573	38.2587	56.85	9.672	77.376	-27.817	243.26	-101.756	97.079	32.169	136.726	-233.916	257.379	1.555	118.848	-99.173	110.788	177.717	4.061	38.959	81.899	-88.723	27.3	-32.343	128.854	-61.323	19.285	-54.954	53.422	25.415	163.942	-43.733	57.293	-13.65	90.999	-57.236	128.643	-49.994	53.394	-25.31	41.685	0.220675	65.115	7.75093	83.3492	-113.313	132.425	7.4347	76.8723	-28.6036
574	38.0676	56.9251	9.672	78.988	-27.208	243.561	-100.725	97.083	32.623	137.709	-234.613	258.701	-5.536	122.279	-97.973	111.627	177.154	2.451	39.514	82.228	-86.448	31.85	-31.183	131.967	-63.587	21.238	-55.155	53.838	26.306	164.6	-42.59	57.549			-58.577	128.411	-47.461	52.756	-25.666	38.953	-1.39913	64.2551	10.0123	81.3995	-113.889	135.572	9.32523	75.464	-29.7684
575	37.9493	53.9971	9.672	77.376	-26.914	243.551	-101.019	96.369	32.633	137.286	-235.343	259.169	0.353	121.461	-96.66	112.589	176.981	1.341	39.253	82.675	-86.448	22.75	-32.355	128.715	-63.668	21.222	-54.842	52.787	25.527	164.384	-43.083	57.217			-57.604	129.469	-47.193	53.242	-27.793	41.538	-1.17618	65.4881	9.29793	82.9374	-115.133	137.351	5.6511	75.9304	-33.9293
576	39.1914	57.6599	11.284	75.764	-26.76	243.732	-100.338	95.812	33.291	137.369	-234.377	260.471	3.845	120.574	-97.706	112.661	178.074	-1.354	39.081	83.429	-86.448	25.025	-34.583	129.858	-62.321	22.773	-55.31	54.841	25.071	161.506	-42.705	57.934			-57.926	130.223	-46.498	53.722	-28.319	42.156	-0.379925	63.5498	8.8088	81.1765	-115.331	138.518	7.87833	74.3698	-33.4061
577	39.0845	58.3606	11.284	75.764	-27.837	243.011	-101.206	95.311	32.489	136.6	-235.393	262.058	0.656	119.957	-98.387	112.977	178.666	-3.574	38.822	84.297	-88.723	29.575	-35.11	125.8	-63.431	22.516	-55.137	56.62	25.388	162.157	-43.121	57.359			-57.806	131.743	-45.988	53.699	-28.621	41.791	0.26845	62.1826	6.01965	79.9207	-114.182	133.688	7.0707	75.8531	-35.9222
578	39.444	60.0532	9.672	77.376	-28.537	242.702	-100.57	95.434	31.775	137.091	-235.159	263.256	-1.5	129.647	-97.74	113.077	179.278	-3.947	39.355	83.595	-86.448	27.3	-35.548	128.421	-60.694	23.534	-55.613	56.682	23.651	161.301	-43.242	56.386			-57.567	131.209	-45.98	53.865	-29.835	41.793	0.7189	63.7682	9.04085	80.6465	-114.312	136.245	7.8715	76.556	-34.8507
579	39.6692	61.1497	12.896	77.376	-28.922	243.294	-100.968	96.038	30.979	136.557	-236.15	263.673	4.571	123.884	-99.5	115.242	180.882	-6.091	40.676	83.564	-86.448	29.575	-37.947	126.592	-60.845	24.529	-55.824	56.468	22.603	160.792	-43.597	55.827			-57.162	132.053	-46.294	53.664	-30.538	42.301	0.546	62.8309	9.67785	80.9149	-115.902	137.344	6.07425	74.6587	-38.8388
580	38.8115	60.3171	9.672	77.376	-27.933	242.929	-99.793	96.999	31.726	136.332	-237.366	264.164	2.53	122.559	-98.739	113.15	182.39	-6.429	41.206	84.634	-86.448	29.575	-39.119	127.556	-62.595	23.988	-56.124	56.218	21.243	159.898	-42.931	55.371			-57.481	132.845	-47.446	54.491	-30.981	42.458	0.011375	63.5612	9.45263	82.8145	-114.587	136.361	9.50267	75.1341	-31.2357
581	40.0218	61.127	11.284	75.764	-28.545	243.008	-99.918	96.607	31.015	136.5	-237.362	266.091	5.799	122.051	-97.597	113.521	182.739	-5.986	40.963	84.849	-88.723	25.025	-32.342	125.574	-62.098	23.028	-56.146	56.843	21.888	160.211	-43.021	56.209			-59.115	131.802	-48.584	54.781	-31.01	45.331	0.912275	64.1777	6.2153	81.2789	-113.884	139.178	5.9969	74.4243	-32.5188
582	40.2994	61.1065	11.284	77.376	-28.507	242.34	-100.462	96.561	30.671	136.339	-238.221	266.582	2.187	124.689	-98.947	111.649	182.573	-6.599	40.647	84.338	-86.448	25.025	-36.934	126.29	-61.954	23.978	-56.493	56.232	21.308	158.529	-44.681	54.444			-58.228	130.647	-49.563	53.454	-30.678	42.074	-0.025025	64.3597	7.37328	81.8773	-113.814	137.89	11.3318	76.5879	-35.4968
583	38.8183	60.9837	9.672	77.376	-29.041	242.547	-100.394	96.383	30.265	136.323	-236.393	268.134	2.457	123.77	-100.485	112.586	184.297	-7.971	41.838	85.666	-86.448	25.025	-36.164	129.268	-62.02	24.626	-56.422	56.881	20.308	156.488	-43.321	55.187			-59.217	130.576	-48.854	52.781	-32.76	45.584	2.61625	65.8544	7.40968	82.1161	-113.554	139.96	4.55683	73.4324	-31.304
584	40.8567	61.8504	9.672	75.764	-29.916	241.942	-102.353	95.619	29.904	136.977	-233.089	271.317	4.316	123.574	-98.65	113.723	185.299	-7.755	41.188	86.537	-86.448	31.85	-35.63	128.123	-60.625	25.566	-56.336	55.112	19.85	155.997	-43.884	54.652			-59.242	129.569	-50.896	54.649	-30.686	42.495	0.384475	66.2412	7.8442	82.3937	-112.865	134.359	9.19327	74.7087	-33.8406
585	40.6361	60.6515	11.284	77.376	-29.896	241.688	-102.319	94.9	30.128	137.097	-232.955	272.353	0.384	125.252	-99.818	112.554	187.858	-9.177	39.368	88.277	-86.448	29.575	-37.847	128.96	-63.182	21.643	-55.382	53.599	21.726	156.866	-44.805	56.114			-59.512	129.639	-52.517	54.159	-31.703	44.366	1.16935	64.2164	7.59395	84.5299	-112.585	133.747	6.14932	73.0866	-30.5805
586	41.9578	61.7776	11.284	77.376	-29.881	241.414	-102.148	95.213	30.299	137.665	-232.561	274.571	4.661	121.72	-99.085	112.633	189.186	-11.324	38.495	88.257	-86.448	29.575	-37.513	127.693	-61.99	23.293	-55.666	51.03	22.522	157.931	-43.195	55.947			-59.714	128.423	-52.32	53.864	-31.782	43.882	-0.338975	66.3549	7.08435	82.3482	-113.711	135.838	10.2352	75.3844	-37.8492
587	40.2652	63.493	9.672	75.764	-30.508	240.574	-102.405	95.126	30.464	137.213	-230.702	274.185	3.084	121.319	-99.246	112.423	189.942	-12.677	40.009	89.212	-86.448	25.025	-31.368	128.113	-62.302	19.277	-54.259	48.036	23.041	156.566	-42.906	55.337			-58.75	128.192	-53.461	53.784	-32.596	45.099	0.2184	64.5463	10.374	84.109	-113.247	135.215	10.0487	74.488	-39.4508
588	40.3858	61.4068	9.672	78.988	-30.152	240.863	-102.45	95.621	30.573	137.771	-230.515	273.886	3.933	121.685	-99.139	110.632	191.864	-13.306	41.106	89.567	-86.448	25.025	-32.576	128.375	-65.6	20.916	-53.708	46.583	23.224	156.897	-42.676	55.544			-58.757	128.514	-52.405	53.671	-32.663	45.168	1.35818	65.0627	7.8897	86.1724	-112.317	133.897	6.64073	73.6076	-29.5909
589	40.1378	60.5104	11.284	77.376	-29.551	241.018	-101.812	96.043	31.596	138.82	-231.647	272.723	4.12	118.712	-99.473	112.37	193.95	-12.211	41.088	91.411	-86.448	27.3	-30.855	129.181	-62.743	22.51	-53.689	46.266	23.677	156.693	-42.872	55.831			-58.65	128.72	-55.366	53.342	-30.473	42.56	1.12385	66.5278	9.3457	84.3911	-112.767	133.449	10.7994	73.2277	-33.9225
590	42.4492	63.4588	9.672	75.764	-30.406	240.283	-102.499	95.64	31.601	139.494	-231.09	272.468	2.79	120.607	-99.314	112.267	196.425	-12.504	40.29	89.968	-86.448	27.3	-30.462	129.278	-63.273	23.073	-53.497	44.189	24.212	157.275	-41.999	55.491			-58.609	129.63	-57.843	53.879	-32.15	44.864	0.53235	65.5769	7.5075	82.6257	-113.35	133.24	8.46528	74.1172	-36.8482
591	40.5018	62.608	9.672	77.376	-29.804	239.936	-101.755	96.06	32.152	139.698	-229.697	273.499	4.706	121.949	-97.7	112.908	197.815	-12.997	40.462	91.784	-86.448	27.3	-29.689	129.732	-63.086	22.544	-53.606	43.234	23.361	155.609	-41.986	56.551			-58.869	129.904	-59.063	54.012	-31.416	46.245	1.6835	65.3858	10.5082	84.382	-113.206	133.065	8.46528	75.6688	-29.6774
592	42.0193	62.3942	9.672	77.376	-28.853	238.797	-101.449	96.178	31.871	137.947	-229.734	272.888	6.347	118.907	-98.933	113.086	198.35	-14.387	41.224	92.833	-86.448	27.3	-33.467	131.104	-63.622	23.365	-53.458	41.379	22.064	154.271	-42.401	54.248			-57.486	129.215	-59.743	53.677	-32.312	43.501	2.12713	64.2756	10.9792	83.265	-112.374	127.031	11.2317	75.0659	-30.3485
593	41.7758	62.3873	9.672	75.764	-28.752	238.849	-100.83	96.04	31.67	136.707	-229.76	272.478	5.887	122.338	-99.895	111.886	199.383	-15.954	41.662	92.901	-86.448	29.575	-32.477	131.544	-60.242	29.271	-52.478	40.927	23.508	155.316	-41.727	55.678			-57.133	130.901	-60.539	54.007	-28.731	43.226	1.94285	67.795	8.75193	82.4778	-113.108	131.713	14.9741	78.2941	-36.2316
594	43.0498	62.8696	8.06	77.376	-28.652	238.239	-101.139	96.215	32.797	137.332	-229.962	271.772	6.522	120.459	-99.948	114.125	201.478	-17.001	41.448	93.993	-86.448	29.575	-31.354	129.829	-61.49	24.665	-52.846	40.087	23.187	154.969	-42.974	53.519			-55.843	130.962	-63.036	53.113	-29.971	42.028	0.015925	65.1833	9.2274	82.4278	-112.38	123.915	13.0949	75.7143	-25.2138
595	41.339	61.2953	9.672	75.764	-28.123	238.304	-100.515	96.129	33.745	137.868	-230.404	272.381	5.28	119.813	-99.173	111.892	203.772	-17.903	41.42	94.236	-86.448	27.3	-29.625	128.298	-60.907	26.391	-53.309	40.816	22.284	153.768	-42.813	54.06			-54.772	131.442	-63.673	53.702	-29.502	43.892	-1.14888	67.0806	9.56865	81.1356	-111.839	123.63	5.38038	76.8085	-34.2615
596	42.8542	61.9414	9.672	78.988	-27.198	238.003	-100.632	96.16	34.071	136.094	-231.157	272.081	3.288	120.645	-100.904	113.038	204.813	-18.162	41.876	95.37	-88.723	25.025	-31.873	130.864	-59.42	26.912	-53.841	39.056	23.057	154.917	-43.479	53.653			-55.383	130.82	-66.55	53.786	-29.078	44.297	-1.20575	65.9227	9.99863	81.6998	-110.865	123.134	12.4579	77.1771	-32.6713
597	42.8724	61.6616	9.672	75.764	-27.467	238.243	-101.202	96.013	34.142	136.023	-231.382	271.703	4.179	121.302	-100.635	112.808	207.445	-19.546	41.535	93.504	-86.448	25.025	-29.784	130.65	-59.325	28.16	-54.405	37.816	23.276	153.454	-41.919	53.52			-54.826	129.858	-69.622	54.099	-33.074	45.79	-1.73355	65.5723	5.66475	79.4225	-109.735	121.726	13.3929	79.3179	-31.7499
598	42.6972	60.0532	9.672	75.764	-27.091	237.688	-101.619	95.622	34.521	135.131	-232.562	271.737	5.857	119.672	-100.247	111.363	209.633	-20.221	41.596	93.763	-88.723	25.025	-30.84	130.176	-60.104	26.548	-55.526	36.946	22.308	154.232	-42.69	52.368			-53.877	128.858	-70.847	54.289	-31.269	45.774	-3.47393	66.6507	9.00445	80.3507	-109.946	120.991	10.465	75.5368	-33.5881
599	42.9702	62.6171	8.06	75.764	-26.099	237.855	-100.035	95.954	35.46	134.805	-233.114	271.442	9.582	116.957	-99.615	113.688	211.74	-20.993	43.087	94.178	-88.723	22.75	-34.8	130.711	-60.651	29.766	-54.8	35.785	23.314	154.106	-42.87	49.831			-54.166	128.123	-72.209	55.028	-31.635	47.286	-3.11902	66.6484	7.0252	81.0992	-109.919	123.093	9.07953	76.7448	-35.7266
600	43.6163	62.0029	9.672	74.152	-26.411	237.602	-100.5	95.569	34.801	134.93	-236.646	270.715	3.259	120.058	-99.467	112.423	213.264	-21.596	43.895	93.356	-88.723	22.75	-27.805	128.329	-60.194	26.525	-54.036	35.905	23.066	154.712	-44.138	48.188			-53.495	128.462	-75.197	54.763	-30.052	44.53	-2.15897	67.3764	7.57575	80.4394	-109.944	126.19	9.92355	76.5014	-34.2888
601	43.6345	63.0448	9.672	74.152	-26.028	238.181	-100.455	95.607	37.699	132.916	-237.573	269.592	2.579	121.481	-100.181	113.492	215.169	-21.185	44.385	93.927	-88.723	29.575	-27.896	128.756	-58.466	28.589	-53.241	33.832	23.864	155.278	-44.439	47.198			-53.233	127.53	-76.05	53.657	-29.3	46.282	-3.4853	65.2151	7.59395	82.5438	-108.54	118.923	12.8765	79.5226	-36.8596
602	41.7645	61.4751	9.672	74.152	-25.969	238.193	-100.513	95.356	38.535	132.494	-239.151	269.75	8.772	119.094	-99.66	112.467	216.031	-21.329	44.284	95.699	-88.723	27.3	-23.234	127.185	-59.933	24.054	-52.715	34.596	22.918	155.36	-43.76	48.358			-52.273	127.656	-78.35	53.793	-27.665	41.161	-3.03485	65.6656	7.35963	80.8148	-108.229	120.391	10.7243	77.234	-36.0201
603	44.1919	64.4712	11.284	74.152	-25.536	238.309	-100.519	95.713	39.854	132.381	-239.975	268.217	4.177	123.109	-100.023	113.082	216.651	-21.905	43.889	95.935	-88.723	27.3	-30.634	128.229	-61.011	24.299	-52.618	33.97	24.091	155.655	-43.137	49.01			-52.279	127.029	-79.736	54.567	-27.909	40.977	-1.98607	66.4345	7.77595	81.3199	-106.741	117.856	7.2618	77.83	-34.3479
604	45.2065	63.3178	11.284	75.764	-25.438	238.178	-100.107	95.7	38.953	131.649	-240.779	268.054	2.915	121.726	-99.242	113.741	216.647	-22.513	44.011	96.023	-88.723	27.3	-22.479	128.729	-60.603	25.297	-52.58	34.487	22.763	155.369	-41.753	49.447			-52.095	127.233	-80.9	54.65	-27.377	40.372	-2.53663	68.1112	6.11975	81.2744	-106.245	118.227	9.35025	77.8641	-32.437
605	45.2202	61.9755	9.672	75.764	-25.994	238.056	-101.192	95.343	37.978	130.967	-241.603	268.069	6.693	122.969	-99.469	111.117	217.898	-23.094	43.486	96.164	-88.723	29.575	-29.749	128.784	-61.467	25.42	-51.29	35.017	21.791	155.667	-40.752	50.435			-51.526	126.878	-79.69	54.168	-30.084	42.739	-1.48785	66.9987	8.84293	81.6338	-107.098	116.064	14.899	83.0625	-32.7555
606	44.0486	61.1907	9.672	75.764	-27.74	237.436	-101.467	95.588	38.663	131.242	-242.03	266.726	-0.462	123.811	-100.22	112.322	217.058	-22.78	44.761	95.845	-88.723	29.575	-27.231	125.916	-59.901	24.35	-50.741	35.98	20.986	155.23	-40.45	51.606			-51.108	127.505	-79.763	54.197	-27.089	39.988	-1.59477	65.6497	7.87833	81.04	-107.728	120.42	4.26335	75.2888	-32.9534
607	44.6742	64.3893	11.284	75.764	-26.882	237.019	-101.115	95.452	38.907	129.18	-241.642	266.42	4.779	119.786	-99.666	113.707	217.482	-23.135	46.226	94.58	-90.998	27.3	-28.504	128.545	-60.601	24.089	-51.075	37.43	22.244	155.82	-40.184	51.44			-49.742	127.269	-79.733	53.701	-28.733	41.875	-0.980525	67.1489	10.7289	81.1015	-104.461	115.288	11.5866	79.691	-32.1048
608	42.1626	60.2738	9.672	77.376	-25.962	237.587	-99.852	95.7	38.718	129.776	-243.793	266.183	8.792	118.856	-99.569	113.677	218.064	-23.305	37.937	91.976	-88.723	27.3	-27.893	125.189	-62.549	24.628	-51.154	37.845	20.153	154.493	-39.603	52.603			-49.784	126.663	-78.494	53.023	-29.513	40.543	-0.8736	66.0068	10.4559	81.0469	-105.085	117.36	17.8565	85.6446	-33.074
609	42.72	61.8845	9.672	75.764	-26.096	237.889	-99.615	96.645	38.529	129.09	-244.338	265.399	6.365	119.607	-98.923	110.696	217.76	-23.962	39.123	93.671	-90.998	29.575	-25.23	125.28	-60.266	28.525	-53.588	39.022	20.262	156.169	-38.834	52.472			-48.925	126.925	-80.881	53.806	-31.264	42.158	-2.02702	67.9156	7.36873	81.2016	-105.385	115.208	10.8859	73.6167	-34.0954
610	45.5046	63.1017	11.284	74.152	-26.664	237.91	-99.666	96.701	37.589	127.431	-245.348	265.316	5.402	116.54	-99.173	112.4	216.682	-23.741	39.121	94.727	-90.998	29.575	-28.007	124.668	-63.203	23.275	-55.338	42.013	21.003	157.912	-38.249	52.723			-47.44	127.4	-83.701	52.817	-32.335	42.005	-2.60032	68.0907	11.6821	81.3449	-104.787	112.333	10.4445	75.5709	-31.7681
611	44.5104	62.5261	11.284	77.376	-28.199	238.014	-100.483	96.19	37.292	126.796	-246.802	264.323	6.503	116.039	-101.86	114.239	217.07	-23.378	39.27	94.582	-90.998	31.85	-26.226	127.008	-64.265	24.45	-55.263	43.629	21.58	156.92	-38.3	52.144			-45.942	127.739	-86.143	52.609	-32.031	45.965	-1.25807	67.8723	9.35935	81.8113	-104.359	112.187	11.9142	71.1916	-32.8578
612	44.995	64.7237	11.284	77.376	-28.191	238.091	-100.235	96.357	35.613	126.091	-247.954	264.624	6.557	116.702	-100.647	114.185	218.496	-23.48	40.858	94.58	-90.998	29.575	-32.532	124.068	-65.223	23.833	-55.327	47.289	22.949	157.369	-38.445	51.994			-44.62	126.572	-83.345	51.808	-30.994	39.214	-1.44007	69.1099	10.1329	81.627	-105.813	108.604	11.152	66.1797	-33.2059
613	45.7685	64.6032	9.672	77.376	-28.758	237.628	-100.661	96.293	34.984	125.949	-249.322	264.471	5.644	119.44	-100.982	112.864	218.279	-23.727	39.255	95.465	-90.998	27.3	-30.543	122.402	-63.774	26.269	-56.154	50.079	23.687	158.63	-38.27	52.874			-42.617	126.531	-84.987	52.599	-32.266	42.628	-1.18982	67.1443	9.68695	80.56	-105.305	105.883	13.6022	73.8783	-34.1387
614	43.5094	61.9665	11.284	75.764	-28.41	237.647	-100.464	96.155	35.719	125.948	-249.737	263.874	4.424	117.331	-99.042	113.221	216.503	-23.514	39.666	95.363	-90.998	25.025	-27.809	122.942	-62.101	25.383	-57.213	53.45	23.717	157.369	-38.371	53.862			-43.482	125.077	-81.145	51.642	-35.503	44.642	-1.23077	67.9724	9.91445	81.0969	-105.555	109.701	13.4225	74.1787	-38.4566
615	46.7877	64.6055	11.284	77.376	-27.583	238.147	-99.439	96.548	36.822	126.515	-251.408	263.671	6.471	115.059	-99.778	113.369	217.72	-25.174	39.826	95.494	-90.998	27.3	-35.765	120.778	-63.07	26.261	-57.572	55.841	23.168	156.746	-38.672	53.097			-41.023	123.601	-77.521	51.187	-31.436	42.524	-1.547	66.4163	11.0315	82.3937	-106.484	105.794	12.5603	66.314	-36.7731
616	46.1507	62.5739	11.284	77.376	-29.014	237.889	-100.487	96.314	36.101	125.342	-252.04	263.252	2.67	118.453	-98.865	112.892	217.024	-23.89	40.243	95.455	-90.998	31.85	-33.293	120.153	-64.402	25.768	-58.034	58.309	22.772	158.303	-38.856	54.238			-39.451	123.897	-76.332	49.059	-31.543	42.336	1.04422	64.8557	11.3159	81.3995	-106.447	107.478	13.054	67.5766	-38.1358
617	46.2826	63.5589	11.284	78.988	-29.034	238.929	-100.509	96.395	37.157	122.986	-252.374	261.972	2.671	115.552	-100.272	114.632	215.727	-24.874	40.189	96.222	-90.998	29.575	-23.249	121.424	-62.605	30.08	-58.413	59.128	23.616	157.284	-37.359	55.16			-36.438	122.752	-74.614	50.668	-28.926	40.215	2.78233	63.9821	10.4627	82.4528	-106.479	104.42	14.4121	79.4908	-39.2642
618	47.9297	65.379	9.672	75.764	-29.466	238.979	-100.948	95.826	38.933	120.855	-252.133	261.656	5.111	117.309	-101.072	112.442	216.006	-24.502	41.118	94.692	-93.273	27.3	-32.43	121.776	-62.8	24.481	-58.174	59.477	24.136	157.205	-37.481	55.522			-35.252	121.417	-71.874	52.102	-30.461	41.019	2.7209	64.4849	10.2443	81.3062	-107.198	102.025	12.9629	75.4071	-36.7071
619	44.6765	62.5534	9.672	77.376	-30.195	239.708	-101.397	95.834	41.376	119.626	-252.969	262.149	3.064	118.517	-100.299	113.877	215.438	-25.467	40.538	96.087	-90.998	27.3	-27.132	119.864	-63.875	27.295	-58.746	59.608	25.286	157.222	-36.05	56.776			-35.489	120.733	-72.374	52.757	-33.374	42.307	5.7694	62.7149	11.2726	81.486	-107.512	103.315	13.0631	71.5101	-37.3555
620	46.162	65.7589	11.284	77.376	-29.918	241.113	-101.762	96.135	44.516	118.002	-252.57	259.851	-1.155	121.822	-100.961	111.205	215.428	-25.363	41.73	95.461	-93.273	22.75	-29.354	120.646	-64.359	23.702	-59.617	60.106	25.568	155.634	-35.271	56.551			-35.665	120.822	-71.507	53.398	-31.967	40.477	5.2689	64.1231	12.9539	79.9776	-107.778	105.681	12.9243	64.3461	-41.496
621	46.4191	63.2177	11.284	75.764	-29.892	241.849	-100.895	95.676	44.355	117.128	-253.616	259.977	-1.579	121.069	-101.083	113.38	214.885	-26.168	41.727	96.961	-93.273	22.75	-35.78	121.764	-63.064	24.313	-59.709	61.164	24.532	157.142	-35.466	58.358			-33.387	121.298	-71.357	53.66	-33.755	39.967	6.6521	61.4819	11.4819	82.7781	-106.613	100.275	12.6809	73.7509	-41.4027
622	44.7606	61.2157	9.672	77.376	-31.495	242.611	-101.703	95.315	43.848	113.843	-253.292	260.558	-0.584	124.495	-100.645	113.171	213.658	-26.197	42.254	94.914	-93.273	22.75	-34.637	123.336	-62.88	26.184	-59.87	60.504	25.177	155.282	-34.818	58.108			-34.811	120.306	-71.547	52.741	-33.468	41.013	7.735	62.5625	10.7994	81.1151	-107.346	105.321	12.0871	67.4879	-42.1785
623	44.8403	63.1426	11.284	77.376	-32.935	243.372	-101.803	95.572	44.216	113.648	-253.32	259.967	-2.056	120.832	-99.732	111.323	213.526	-26.067	41.228	96.124	-93.273	27.3	-25.575	119.211	-64.325	23.322	-60.211	61.36	24.761	155.358	-33.75	59.131			-34.463	121.001	-73.757	54.166	-31.514	41.994	9.6005	62.4465	11.2863	79.7569	-106.952	100.312	13.8479	55.6397	-40.3676
624	45.8617	64.8307	9.672	77.376	-32.327	243.538	-102.03	96.068	44.959	112.792	-251.852	259.918	-1.243	122.326	-98.805	111.332	213.123	-26.386	40.087	96.969	-93.273	27.3	-29.632	121.064	-64.582	29.73	-60.546	61.428	25.899	155.036	-34.009	59.78			-34.911	121.127	-73.591	54.329	-31.654	43.554	8.84065	61.5456	11.673	78.4556	-106.486	101.379	11.6116	72.7363	-38.1472
625	43.7892	62.9697	11.284	77.376	-31.717	244.535	-102.365	95.832	46.368	114.12	-251.495	259.512	2.835	123.49	-100.608	111.914	213.049	-26.663	41.36	97.27	-93.273	27.3	-32.646	122.918	-61.118	25.875	-61.151	61.733	25.26	156.104	-34.853	61.188			-38.125	121.414	-74.755	55.111	-28.508	46.345	10.2307	63.0016	12.0302	80.9786	-106.174	100.029	9.737	70.5546	-43.6095
626	43.3206	60.7652	11.284	77.376	-31.663	243.901	-102.767	95.055	46.762	113.494	-249.88	258.417	2.108	123.464	-98.741	110.047	212.923	-26.37	40.923	96.045	-93.273	27.3	-31.897	121.011	-65.841	20.298	-61.782	61.835	25.111	155.765	-35.095	61.622			-40.176	122.178	-76.823	54.956	-29.633	41.795	11.3955	61.3272	10.8609	80.5009	-105.985	102.025	8.66775	80.444	-40.7271
627	44.8016	62.2872	11.284	77.376	-30.26	243.98	-101.159	95.242	45.138	111.625	-249.408	259.384	2.682	120.227	-99.864	113.207	212.01	-26.396	41.083	96.9	-95.548	27.3	-39.484	122.03	-65.292	24.586	-62.148	62.453	26.549	156.49	-35.885	61.333			-40.131	122.689	-75.329	54.264	-26.216	46.083	10.5242	61.9414	11.557	81.4313	-106.652	101.506	14.9718	91.5596	-44.7629
628	44.6446	61.5797	11.284	78.988	-29.811	244.713	-101.027	94.798	44.014	109.468	-249.188	258.276	4.689	121.207	-99.013	111.547	208.879	-26.389	42.146	95.113	-93.273	29.575	-36.522	123.45	-63.827	26.361	-62.204	63.539	25.546	155.28	-35.886	61.999			-40.731	122.258	-75.601	54.173	-26.107	44.337	10.7539	60.5741	12.4943	81.0992	-105.913	104.129	9.68923	81.9455	-38.9867
629	44.8311	62.7081	11.284	77.376	-29.949	244.82	-101.487	94.393	43.399	109.265	-248.605	259.206	2.387	120.521	-97.014	112.522	208.286	-26.259	41.706	95.535	-93.273	29.575	-33.352	120.932	-63.37	28.296	-62.193	63.547	26.221	155.581	-36.233	63.866			-41.003	123.304	-77.316	54.414	-27.83	43.396	10.5173	61.607	13.0949	80.8853	-105.71	101.495	25.1479	106.848	-41.2548
630	43.7642	64.2142	9.672	78.988	-29.158	243.927	-100.539	93.943	44.955	108.068	-247.613	259.763	7.843	121.92	-97.873	112.565	208.177	-26.155	41.225	95.73	-93.273	29.575	-33.062	122.984	-67.494	22.661	-62.563	62.403	25.9	155.573	-36.381	62.085			-42.26	122.767	-77.917	54.663	-23.407	46.112	9.9554	61.8572	14.7056	83.0716	-104.686	101.831	8.7997	85.1942	-39.9263
631	45.7184	62.294	11.284	78.988	-29.786	244.341	-100.628	94.432	46.529	108.665	-248.222	259.203	5.092	124.175	-99.66	113.031	208.243	-25.717	41.671	94.906	-93.273	29.575	-34.425	124.437	-66.232	25.546	-63.257	62.039	26.452	155.246	-37.483	63.63			-43.594	124.447	-75.728	54.585	-24.075	45.206	8.68823	60.242	14.3939	82.7531	-104.837	102.732	9.51405	86.243	-37.0211
632	44.4057	61.0837	11.284	77.376	-29.848	245.185	-100.521	94.713	46.931	110.135	-248.905	258.168	2.479	122.559	-98.11	113.493	211.185	-25.756	40.483	95.178	-93.273	27.3	-35.812	121.119	-63.838	25.199	-63.016	61.059	26.534	155.911	-37.027	63.328			-44.464	124.702	-75.204	54.381	-26.639	45.522	8.66548	62.947	13.4066	82.2071	-104.375	100.735	8.26507	74.074	-37.062
633	45.0655	62.9015	11.284	75.764	-29.995	244.915	-100.189	94.481	46.615	110.091	-247.636	256.813	3.062	123.495	-98.014	111.781	211.038	-26.824	41.518	94.819	-90.998	31.85	-36.134	122.503	-64.649	24.744	-62.904	59.435	27.825	155.849	-36.491	64.277			-44.191	124.641	-74.999	54.327	-22.05	46.383	8.0808	61.334	10.4923	80.6374	-104.743	100.714	5.9787	76.0897	-34.8871
634	42.6176	59.9872	12.896	77.376	-30.348	244.844	-100.835	94.411	46.563	110.473	-248.591	256.953	5.928	122.654	-99.654	113.176	210.514	-26.37	41.833	95.254	-90.998	27.3	-36.145	121.267	-65.518	23.018	-62.978	59.637	29.117	156.308	-37.936	64.566			-43.921	126.066	-72.688	52.415	-22.18	45.227	8.27418	62.1007	14.2643	79.9685	-104.529	102.607	5.5692	81.1811	-37.1348
635	44.6719	62.5875	11.284	77.376	-30.474	245.496	-99.708	94.391	49.19	110.818	-248.425	257.206	5.31	123.29	-98.714	112.785	211.04	-26.896	43.023	94.553	-90.998	31.85	-34.303	120.809	-65.457	23.549	-63.629	59.053	28.652	155.715	-37.821	65.002			-45.919	126.423	-72.311	53.622	-23.636	47.351	6.65893	60.8107	15.3153	79.8002	-104.179	102.011	6.5884	74.4585	-36.4227
636	45.1246	62.3487	11.284	77.376	-32.443	246.792	-100.253	93.98	49.291	112.245	-249.82	256.325	10.057	122.775	-98.98	113.297	212.435	-27.102	42.264	94.472	-88.723	34.125	-36.893	121.929	-66.708	20.469	-63.768	57.324	28.97	156.063	-37.774	65.848			-46.73	126.581	-71.296	53.274	-21.836	45.837	5.99462	61.5387	13.6477	80.3871	-104.09	101.026	6.2972	85.5241	-34.787
637	46.2917	65.6019	11.284	77.376	-32.265	246.922	-99.727	94.335	51.171	111.191	-249.331	254.755	7.086	120.389	-99.841	114.038	213.279	-27.215	43.827	93.253	-90.998	27.3	-36.108	121.811	-63.072	25.553	-63.417	56.295	29.528	156.86	-36.288	66.727			-46.374	126.703	-73.145	53.09	-21.019	49.824	5.80125	59.8552	9.86895	80.5418	-104.154	97.7886	9.53225	90.8954	-34.3138
638	43.1841	60.9563	11.284	78.988	-31.462	246.627	-99.581	94.071	53.411	109.463	-250.049	255.888	4.753	123.109	-98.817	113.376	213.154	-27.079	43.648	93.492	-86.448	38.674	-37.555	121.556	-63.217	26.291	-63.832	55.151	29.429	155.197	-35.166	67.103			-46.91	126.835	-71.104	52.872	-20.702	47.694	4.48175	60.7334	12.4693	79.236	-102.484	102.159	3.1122	81.1697	-37.2235
639	44.0713	63.2996	11.284	77.376	-31.689	246.187	-100.466	94.329	53.028	108.034	-249.694	256.572	5.716	124.457	-99.883	114.685	213.704	-27.261	43.263	94.429	-86.448	38.674	-35.592	121.099	-66.612	20.01	-64.812	55.501	29.276	156.726	-36.648	67.302			-46.715	125.98	-72.729	53.122	-19.868	48.618	4.46355	59.1068	15.1151	79.2974	-102.698	98.4142	2.16125	83.0648	-36.3431
640	44.9995	63.5521	11.284	78.988	-30.971	246.596	-100.579	94.655	53.873	108.758	-251.325	256.422	11.302	122.605	-96.7	110.59	213.777	-27.681	42.288	95.522	-86.448	36.4	-38.807	120.714	-64.77	24.6	-64.192	55.32	28.109	156.658	-35.611	67.074			-46.838	126.675	-74.529	53.392	-19.444	50.458	2.82555	58.9771	11.5115	80.1096	-101.938	99.0421	4.26562	80.0322	-33.1968
641	45.8299	66.6552	11.284	80.6	-30.301	246.331	-100.164	94.102	54.021	108.459	-251.454	259.203	10.338	122.254	-96.832	110.954	213.443	-27.537	44.094	95.009	-84.173	36.4	-35.649	121.412	-64.644	23.146	-63.184	56.37	28.57	156.587	-35.899	67.848			-44.886	124.79	-75.022	53.659	-20.201	51.442	4.17007	61.0428	8.918	79.1381	-102.744	101.065	3.73783	83.654	-36.5865
642	46.203	64.2938	9.672	78.988	-30.582	245.469	-100.984	94.35	53.3	107.793	-253.038	258.915	10.525	123.306	-98.441	110.34	212.452	-26.927	44.77	94.858	-84.173	34.125	-35.922	120.217	-63.784	25.74	-62.572	55.158	28.052	157.025	-33.991	68.679			-43.271	123.211	-76.606	53.644	-20.735	50.214	3.45573	60.4536	10.01	80.8694	-103.23	99.0603	6.2972	86.4773	-34.5754
643	47.3109	67.4265	11.284	77.376	-31.242	245.595	-100.256	94.015	53.638	107.309	-253.967	260.649	10.037	124.192	-99.801	110.932	213.524	-26.996	43.565	95.979	-86.448	27.3	-37.163	121.295	-66.99	21.398	-61.798	54.283	28.356	157.723	-34.769	69.378			-40.218	123.752	-78.464	53.695	-18.264	52.49	4.43852	60.2602	10.192	78.053	-103.913	99.4403	5.4054	83.9975	-35.5491
644	44.7038	63.5703	11.284	78.988	-31.834	246.425	-100.354	94.671	54.569	107.587	-254.181	260.155	8.338	125.062	-98.567	112.228	213.782	-27.114	44.919	95.594	-84.173	38.674	-40.551	120.238	-63.842	25.129	-60.967	54.492	27.241	158.189	-33.449	69.486			-39.373	123.47	-76.315	54.212	-18.532	55.959	3.24415	61.1565	11.2453	76.4377	-102.37	102.243	4.55683	84.6823	-36.0974
645	46.4259	64.8352	9.672	78.988	-32.282	246.571	-99.919	94.441	54.194	107.084	-255.636	261.903	7.768	123.863	-98.874	113.002	214.014	-27.378	44.378	96.472	-84.173	38.674	-39.857	121.178	-62.888	25.486	-60.525	54.541	27.779	158.895	-34.285	68.409			-39.159	123.799	-73.735	54.223	-19.367	53.5	2.1476	62.5375	10.3649	78.963	-104.027	98.6827	6.78632	83.2036	-37.9789
646	44.4876	61.9915	9.672	80.6	-32.904	246.984	-100.599	93.812	53.685	106.95	-255.779	261.48	11.452	121.239	-98.258	109.066	214.346	-27.668	44.009	95.83	-86.448	34.125	-39.129	121.351	-59.888	27.4	-60.828	54.592	27.983	157.793	-32.32	68.442			-37.952	123.629	-72.566	54.145	-20.257	52.758	3.094	62.2918	11.5456	78.7036	-104.418	99.2037	5.20975	82.0774	-36.9915
647	43.9393	60.0441	9.672	78.988	-34.126	246.81	-100.526	93.775	52.711	107.331	-256.773	261.655	5.826	122.262	-100.763	112.805	212.859	-27.091	45.355	94.677	-84.173	36.4	-36.843	122.634	-61.042	27.665	-60.518	55.017	28.682	158.987	-32.673	69.003			-38.589	124.955	-75.411	54.932	-20.884	53.898	2.55483	61.5478	11.7549	80.1642	-105.671	99.5381	2.7846	82.446	-37.3373
648	42.7541	63.5407	11.284	80.6	-34.508	246.972	-100.967	93.625	52.541	107.844	-256.898	261.822	3.705	123.166	-100.956	109.596	212.074	-27.768	45.666	96.48	-84.173	36.4	-38.118	120.189	-62.686	29.873	-60.496	55.519	30.219	159.181	-32.181	69.707			-39.63	125.421	-72.663	55.533	-20.643	50.994	3.62635	62.3168	12.2827	78.5239	-104.741	104.589	4.83437	83.8724	-36.9187
649	45.1087	64.0299	11.284	78.988	-34.908	248.026	-100.436	94.054	52.16	109.92	-257.376	263.232	3.539	124.614	-99.041	111.375	211.786	-27.695	46.187	95.221	-84.173	36.4	-37.958	120.325	-64.149	26.004	-60.716	55.548	28.893	158.916	-33.778	69.398			-39.822	126.715	-76.08	55.351	-21.01	51.024	0.621075	61.905	12.4693	80.4736	-105.835	102.232	9.73245	85.0554	-36.2021
650	45.2407	60.9905	11.284	78.988	-34.644	247.969	-100.043	93.028	53.196	109.278	-258.467	262.769	3.17	122.208	-100.062	112.732	210.319	-27.714	46.054	96.626	-84.173	29.575	-39.72	122.933	-60.907	29.477	-60.563	54.175	29.531	159.668	-33.439	68.622			-40.47	129.389	-77.055	53.979	-21.485	53.151	1.49468	62.8127	11.0406	80.3416	-102.941	110.055	8.1718	84.8393	-36.6798
651	46.7604	63.5589	11.284	77.376	-35.847	248.096	-101.181	94.115	52.327	108.965	-257.599	263.198	6.763	120.921	-99.956	112.058	209.533	-27.598	45.646	96.163	-84.173	36.4	-38.507	122.197	-58.237	29.871	-60.924	53.486	29.834	158.517	-31.078	68.337			-40.595	128.98	-75.452	54.629	-21.154	52.233	3.17135	62.4851	11.9324	80.5327	-105.214	108.103	9.20238	85.5787	-38.3133
652	44.0395	62.0302	11.284	77.376	-35.522	247.367	-100.35	93.788	52.913	108.629	-255.375	263.836	7.14	123.209	-100.128	111.379	209.914	-28.175	45.363	97.067	-84.173	36.4	-39.605	122.251	-58.889	29.826	-60.471	53.515	28.908	158.77	-30.814	69.448			-39.537	130.463	-78.835	55.268	-20.75	49.387	2.1749	61.6366	11.8914	82.0319	-104.827	107.821	8.24915	84.2091	-34.4367
653	46.5511	64.7647	11.284	78.988	-35.288	247.478	-99.37	93.879	54.498	108.486	-254.817	264.322	6.015	121.515	-99.338	112.22	210.185	-27.592	45.813	96.199	-84.173	38.674	-43.789	120.382	-56.247	34.976	-60.124	52.624	29.22	159.391	-30.237	69.753			-39.292	131.037	-78.443	54.483	-20.931	48.556	2.3751	61.0451	11.0315	78.0575	-108.943	100.032	11.3909	86.6661	-36.6343
654	45.1997	61.4341	9.672	77.376	-35.145	247.419	-99.031	93.632	53.874	109.396	-255.451	263.841	7.009	122.587	-98.527	111.656	212.667	-27.057	45.223	97.598	-84.173	36.4	-43.099	124.052	-56.731	34.281	-60.106	52.098	26.004	161.158	-30.379	69.163			-39.317	131.262	-79.304	55.045	-20.965	51.807	0.466375	61.4364	10.3126	80.4554	-105.458	108.192	9.7188	84.4753	-35.2102
655	45.773	63.7523	9.672	77.376	-35.078	247.454	-99.099	93.925	53.344	109.261	-254.7	264.54	2.373	120.603	-99.921	113.554	212.856	-27.198	46.376	96.831	-84.173	34.125	-42.393	125.027	-60.571	29.968	-58.755	52.144	25.383	161.597	-30.963	68.865			-38.599	131.781	-80.495	55.46	-22.24	50.104	1.69943	62.1098	12.8492	82.1252	-106.295	106.142	6.83638	82.1593	-32.9761
656	44.4967	60.9086	9.672	77.376	-35.65	247.328	-99.779	93.815	52.11	108.045	-255.156	265.218	4.023	122.25	-100.449	112.103	213.348	-26.864	46.898	96.69	-86.448	34.125	-40.35	123.018	-58.281	31.909	-58.982	52.934	25.663	160.144	-30.511	69.182			-38.308	131.296	-81.866	54.278	-22.307	47.995	0.70525	59.0226	11.1202	78.8151	-107.744	103.11	10.7744	83.7655	-37.6808
657	45.0132	59.0317	11.284	77.376	-36.821	247.468	-100.358	93.858	50.785	109.049	-254.054	266.529	6.176	122.642	-99.854	113.209	212.822	-28.061	47.809	94.852	-84.173	38.674	-40.577	122.552	-57.471	34.343	-58.707	53.857	25.058	159.158	-30.415	68.074			-37.764	133.023	-81.96	54.901	-21.833	49.911	1.34453	58.5494	11.8437	78.0825	-108.604	101.144	9.16598	82.967	-33.8839
658	46.41	62.3896	9.672	75.764	-36.777	246.926	-100.042	93.432	50.924	109.291	-253.253	266.455	3.595	121.809	-100.16	110.938	212.053	-26.651	47.215	95.819	-84.173	36.4	-41.571	119.958	-61.809	29.311	-58.933	54.58	23.432	159.538	-30.411	68.029			-37.613	134.117	-82.234	55.549	-24.647	51.552	0.80535	62.2667	11.5616	80.6715	-108.288	102.939	7.39147	82.678	-35.4149
659	45.0245	61.7094	11.284	80.6	-37.182	247.538	-100.44	93.557	52.142	109.601	-252.289	266.964	1.05	120.54	-99.943	112.134	212.68	-27.272	47.049	95.539	-84.173	38.674	-42.537	122.489	-58.956	31.214	-59.484	54.603	24.285	159.4	-31.245	66.967			-36.554	133.721	-80.328	54.226	-24.582	50.37	1.80635	61.7253	9.92583	77.9324	-106.606	103.342	9.99863	82.0934	-34.3843
660	46.5374	64.0162	11.284	77.376	-37.946	247.822	-100.73	94.07	50.913	110.001	-250.525	267.074	5.084	124.202	-101.472	113.508	212.489	-26.398	47.291	96.316	-86.448	38.674	-39.223	120.506	-62.782	30.021	-60.431	56.531	25.013	158.602	-31.7	67.476			-38.719	131.812	-80.084	52.861	-25.75	48.08	3.29193	62.9993	10.4741	80.9013	-105.226	108.399	10.8518	79.3656	-32.4347
661	43.7574	57.8328	12.896	74.152	-38.495	247.715	-101.476	93.707	49.951	107.353	-249.029	266.248	4.706	125.152	-100.268	112.836	213.019	-27.99	47.375	96.461	-86.448	36.4	-45.945	116.43	-57.196	33.613	-61.452	56.651	25.859	157.344	-31.909	67.087			-39.58	130.675	-80.354	51.276	-26.085	49.233	2.7391	60.0236	9.9736	77.7868	-105.938	104.677	12.3601	80.1505	-32.4938
662	44.1418	62.4965	11.284	78.988	-38.018	247.764	-101.484	94.082	49.646	107.115	-248.646	266.814	4.126	122.116	-101.504	111.062	213.763	-26.747	47.153	96.767	-84.173	36.4	-39.52	118.79	-63.72	29.335	-62.845	57.844	25.877	155.66	-32.289	67.656			-40.543	128.852	-86.609	49.368	-29.169	48.172	2.92337	62.517	8.45162	78.4943	-105.148	104.477	13.5954	82.6075	-31.4746
663	45.4568	63.3633	11.284	80.6	-38.341	247.344	-101.766	93.513	49.163	104.494	-247.019	264.845	1.3	123.772	-100.45	112.563	213.585	-27.876	48.13	95.698	-86.448	36.4	-39.167	121.358	-63.016	29.192	-62.663	58.75	26.24	155.451	-31.842	67.432			-40.774	129.02	-86.18	49.614	-30.814	46.36	3.07807	61.2726	8.44253	79.4225	-103.892	106.377	13.2064	80.7557	-31.7749
664	44.7288	60.6902	11.284	77.376	-37.236	247.745	-100.658	93.22	50.169	103.97	-245.916	263.364	7.258	121.525	-98.556	111.599	213.942	-26.795	48.547	95.011	-86.448	34.125	-37.453	117.999	-62.587	26.44	-63.331	59.706	27.171	155.055	-33.069	68.146			-41.437	128.847	-85.783	47.848	-29.595	43.958	2.84375	60.1806	7.91928	78.0143	-104.275	104.188	11.4137	79.3293	-29.0586
665	48.1117	66.0342	12.896	77.376	-37.451	248.827	-101.307	94.204	49.359	104.122	-244.941	261.746	7.393	123.175	-99.58	113.156	214.047	-27.59	49.61	94.835	-86.448	34.125	-38.396	118.361	-64.054	29.86	-62.817	59.844	29.123	154.247	-32.086	68.776			-42.791	128.403	-87.333	49.846	-32.767	45.424	3.76512	60.9518	7.95113	79.1677	-103.801	104.55	11.7777	77.4615	-26.6903
666	47.6863	63.7569	11.284	77.376	-37.711	248.641	-100.852	94.157	49.783	104.16	-243.806	261.215	6.863	123.145	-99.952	113.092	213.533	-27.102	48.775	93.396	-84.173	34.125	-41.002	119.606	-64.059	27.346	-62.468	58.297	29.548	154.218	-33.014	67.458			-43.43	127.245	-88.651	48.719	-32.792	48.252	1.35135	61.3135	7.91018	78.7855	-104.165	101.128	10.9359	78.8674	-30.642
667	43.978	61.0883	11.284	77.376	-37.562	248.17	-100.423	93.675	49.808	107.325	-244.187	258.31	7.649	122.536	-99.025	111.521	214.079	-27.363	48.319	94.391	-86.448	36.4	-36.916	116.535	-61.852	30.113	-62.978	58.224	29.471	154.752	-31.926	66.758			-43.69	127.301	-88.658	46.476	-35.336	48.2	2.8756	61.1611	6.84548	78.4056	-103.472	104.582	12.5671	81.0651	-30.8467
668	43.4753	58.2718	11.284	78.988	-38.231	248.191	-100.185	94.052	50.153	107.549	-243.034	259.997	5.746	123.269	-98.213	111.878	214.177	-27.077	47.352	96.761	-86.448	36.4	-41.11	119.546	-63.134	27.083	-62.741	56.268	30.208	154.954	-32.493	66.72			-45.295	127.901	-88.575	46.008	-33.464	45.27	3.92665	61.8049	6.48603	80.419	-103.569	100.692	13.1586	83.6745	-30.5851
669	45.2202	61.7071	11.284	77.376	-38.352	248.268	-100.946	93.736	50.049	107.494	-241.242	259.021	9.025	123.215	-99.425	111.771	214.136	-27.327	49.033	95.143	-84.173	36.4	-42.747	119.791	-64.132	27.337	-61.764	53.79	31.37	155.03	-30.057	65.695			-44.698	127.59	-92.26	46.132	-35.275	43.528	4.60233	61.5228	8.12403	79.3429	-103.365	99.4858	13.1791	81.3768	-29.7024
670	46.0642	63.6158	9.672	75.764	-38.373	248.259	-101.035	93.737	49.65	107.584	-239.197	256.773	10.183	122.499	-100.386	113.391	214.281	-27.279	46.378	96.043	-84.173	36.4	-40.932	118.389	-59.706	33.203	-61.177	54.105	32.616	155.454	-30.851	66.571			-44.266	128.019	-92.595	46.47	-34.216	40.046	4.16098	61.4591	3.66048	79.5158	-102.027	103.781	10.688	79.6068	-28.6104
671	45.4204	64.0003	12.896	78.988	-38.929	248.719	-101.643	93.724	48.791	107.878	-238.697	257.42	12.168	120.814	-101.5	112.097	214.116	-27.579	47.942	96.868	-86.448	34.125	-41.056	120.973	-64.401	29.304	-62.07	54.179	33.774	156.405	-30.418	67.805			-44.944	128.715	-93.992	46.578	-36.319	43.064	2.98935	62.3122	7.58713	79.4043	-104.757	95.6638	12.5717	79.4271	-25.9532
672	47.7978	65.3084	12.896	74.152	-38.12	248.628	-101.325	94.436	49.643	107.538	-238.111	256.677	10.239	121.695	-100.287	114.467	213.919	-26.523	47.587	96.327	-86.448	34.125	-42.64	116.625	-61.761	32.677	-62.713	54.708	34.191	156.743	-30.378	68.429			-45.648	129.314	-90.557	42.913	-37.689	41.614	3.3761	60.9268	8.02848	77.4251	-103.801	97.5725	12.9493	81.015	-24.5996
673	47.2859	64.5895	12.896	75.764	-38.612	248.588	-100.918	94.193	49.495	107.929	-237.47	258.417	10.721	119.8	-101.695	112.307	213.477	-26.696	48.744	96.149	-86.448	31.85	-41.36	117.487	-63.436	28.72	-62.865	54.57	35.672	156.625	-30.515	66.78			-46.521	128.006	-87.515	42.527	-40.157	44.164	3.21458	61.4	6.43598	78.3146	-105.003	96.0141	14.7784	82.9329	-28.2805
674	46.7103	61.2476	14.508	75.764	-40.307	248.865	-101.856	93.873	48.593	106.91	-236.728	257.824	16.499	121.443	-101.151	112.182	213.304	-26.977	48.118	96.556	-88.723	34.125	-36.871	116.8	-64.649	28.459	-60.942	54.76	35.384	157.873	-30.519	67.644			-46.59	128.205	-87.966	43.429	-42.776	42.906	5.9332	63.0675	5.17562	79.8252	-106.106	92.7631	12.0666	80.1096	-28.913
675	44.0463	61.0792	11.284	72.54	-40.441	248.53	-101.48	93.317	48.351	107.524	-236.798	258.889	15.463	119.206	-100.34	111.045	212.52	-27.563	49.951	95.126	-86.448	34.125	-36.884	116.272	-62.237	31.11	-60.64	53.247	36.403	159.105	-29.635	66.972			-46.298	128.132	-87.562	41.726	-40.571	43.545	5.8968	61.6639	4.99135	80.9422	-105.747	93.8005	13.7524	85.3443	-26.3377
676	45.4613	61.5342	12.896	72.54	-40.485	248.486	-101.501	93.155	48.527	110.023	-236.895	258.278	13.731	120.249	-101.286	111.617	212.92	-27.226	48.661	96.673	-88.723	31.85	-39.692	118.158	-65.638	28.894	-60.833	52.915	36.663	159.482	-29.697	65.74			-46.663	129.028	-89.29	44.005	-41.065	42.543	5.89225	63.9093	5.3599	80.2392	-109.002	86.5979	11.9893	81.6043	-29.3498
677	46.1802	61.2589	12.896	72.54	-41.408	248.676	-101.623	92.602	49.16	109.108	-236.194	258.766	8.385	117.016	-101.133	111.356	212.389	-27.378	49.887	94.038	-86.448	31.85	-47.361	113.499	-65.373	28.484	-61.366	53.678	36.015	158.536	-28.36	66.927			-47.276	130.38	-89.25	44.109	-43.913	45.542	6.9797	63.5749	3.0212	79.2815	-110.524	81.693	13.5795	85.7038	-28.2214
678	46.6284	62.9766	14.508	70.928	-41.77	248.509	-100.861	92.804	49.565	110.949	-235.509	256.341	10.944	120.632	-101.547	112.188	211.281	-27.168	48.522	93.924	-86.448	34.125	-38.882	118.856	-65.905	26.941	-61.682	53.639	37.437	159.262	-29.161	66.414			-46.741	130.269	-91.975	46.841	-40.398	41.188	6.14023	64.3688	3.33515	79.9958	-108.292	87.6921	11.0997	86.1747	-29.8639
679	45.3749	62.3236	12.896	70.928	-42.31	248.484	-101.997	93.117	49.686	110.535	-234.936	256.928	9.097	120.728	-102.143	111.362	211.459	-26.989	49.379	93.867	-90.998	36.4	-35.465	115.013	-67.024	28.388	-62.817	54.243	36.41	160.104	-28.452	65.736			-46.429	130.922	-89.528	46.172	-41.348	41.911	6.64983	62.84	4.00173	80.1915	-107.578	89.8033	10.9814	86.8618	-28.8811
680	47.543	65.0127	14.508	69.316	-42.44	248.809	-101.199	93.758	50.319	112.873	-234.152	256.692	9.902	121.212	-100.622	110.915	211.24	-26.396	50.15	94.162	-90.998	36.4	-36.334	119.197	-63.687	30.264	-62.887	53.917	35.51	160.422	-28.225	65.186			-46.721	130.63	-88.054	45.081	-43.249	44.015	8.79515	62.021	3.20548	78.4989	-110.042	84.6505	10.5719	87.4692	-31.8705
681	47.9638	64.9126	14.508	69.316	-43.127	248.652	-101.641	93.499	49.431	114.049	-234.832	257.494	6.176	120.23	-99.866	111.422	212.124	-27.307	48.644	93.144	-88.723	34.125	-32.294	120.218	-65.249	27.107	-62.218	54.628	33.619	159.013	-27.839	65.905			-47.285	130.923	-91.468	46.959	-44.751	46.171	7.87378	61.582	5.53735	80.2097	-108.517	89.1163	12.8811	87.5192	-27.9484
682	47.0334	65.2925	12.896	69.316	-44.332	249.244	-101.398	93.267	50.309	113.889	-234.587	258.044	1.552	119.424	-100.166	110.428	212.394	-27.136	50.621	92.742	-88.723	36.4	-35.298	120.769	-62.403	27.488	-61.349	54.207	33.607	159.542	-25.646	64.992			-47.825	131.387	-91.299	46.861	-43.793	44.36	8.55173	60.4445	6.06288	78.4784	-109.032	86.764	9.83938	86.6183	-34.3275
683	47.7363	64.5895	14.508	67.704	-45.68	249.589	-101.408	93.809	49.661	114.69	-234.136	257.763	2.461	118.712	-100.801	112.428	211.594	-27.328	50.555	92.037	-88.723	36.4	-32.543	118.818	-64.107	28.625	-60.612	54.275	33.567	159.793	-26.286	64.22			-47.301	131.494	-91.708	45.116	-42.886	41.11	9.5004	59.7074	3.3579	79.807	-109.876	85.0964	8.38792	85.8926	-32.0206
684	46.0278	64.3393	14.508	67.704	-46.811	249.134	-101.424	93.613	49.817	113.543	-234.034	259.518	1.584	120.252	-99.741	110.809	212.059	-27.218	50.504	91.802	-88.723	36.4	-33.734	119.688	-60.179	29.694	-60.584	53.696	34.78	157.448	-26.698	65.07			-47.043	131.302	-90.539	45.634	-45.012	45.29	9.8553	59.5003	4.82528	80.3075	-110.858	82.3368	9.57093	87.0483	-31.7431
685	49.0513	65.0627	16.12	67.704	-46.413	249.809	-100.641	94.791	51.764	112.86	-233.118	259.818	1.755	120.012	-99.608	112.126	212.295	-27.511	50.84	92.712	-88.723	34.125	-34.518	120.125	-62.063	29.987	-59.812	53.855	35.473	157.207	-26.861	64.486			-46.771	131.078	-93.271	47.456	-43.477	43.301	10.1556	58.083	5.30303	79.7888	-112.494	81.7544	9.373	86.7412	-34.3229
686	45.3612	64.1095	14.508	69.316	-47.4	248.671	-100.915	94.043	51.032	111.79	-232.126	257.444	0.398	120.628	-99.415	113.127	211.718	-26.734	50.743	91.915	-88.723	34.125	-37.002	122.692	-62.215	27.457	-59.637	53.448	36.416	157.151	-26.824	64.633			-46.786	131.401	-94.025	46.677	-41.061	40.355	9.72335	57.6439	5.97188	79.2132	-113.866	78.9061	9.89852	86.227	-32.2345
687	46.3736	63.3701	16.12	66.092	-47.717	248.9	-101.689	93.579	49.872	110.077	-228.995	258.638	4.119	121.333	-99.877	113.008	211.243	-27.397	51.071	91.569	-88.723	36.4	-32.007	120.344	-59.295	32.027	-59.375	54.52	35.408	157.985	-25.781	65.565			-47.025	130.748	-95.977	47.644	-40.935	41.03	12.144	57.2208	5.94003	81.9796	-113.179	82.3163	9.1728	85.044	-31.7431
688	46.2894	66.2708	14.508	69.316	-47.584	249.092	-101.274	94.427	49.493	110.181	-226.853	259.683	4.663	119.299	-100.235	111.883	211.134	-27.312	51.736	90.973	-88.723	36.4	-35.694	123.313	-62.153	28.089	-60.147	55.068	35.464	157.349	-25.75	64.013			-47.542	132.336	-90.829	49.417	-37.348	39.819	11.9688	58.0284	6.14023	79.6386	-112.901	81.2607	7.50522	84.9621	-33.6086
689	46.1165	65.5382	16.12	67.704	-47.633	249.335	-100.898	94.439	49.645	114.41	-225.209	259.127	6.15	122.741	-100.34	110.737	210.534	-27.327	52.922	89.894	-88.723	34.125	-35.823	120.773	-59.07	29.986	-60.073	55.798	35.736	157.716	-24.799	64.457			-47.883	131.99	-93.482	49.367	-43.643	42.443	11.2157	57.9442	5.38265	80.6533	-113.356	80.9513	6.50423	86.4818	-30.4259
690	45.5796	67.7063	16.12	67.704	-46.985	249.587	-100.292	94.224	49.139	113.104	-224.311	259.041	5.657	121.653	-100.537	111.511	210.804	-27.103	50.623	90.792	-86.448	38.674	-36.642	120.593	-60.085	29.417	-60.702	54.071	36.808	156.274	-25.437	64.042			-48.043	130.747	-91.404	49.877	-44.426	45.387	11.1976	56.6065	6.9433	81.4746	-113.102	81.8568	10.0328	87.4078	-30.5032
691	46.4077	63.0471	16.12	67.704	-47.404	248.991	-100.949	93.615	47.918	109.385	-222.117	259.107	9.325	122.762	-100.849	111.138	211.178	-26.993	51.379	90.162	-86.448	34.125	-36.535	123.016	-61.672	29.388	-62.263	54.443	38.071	157.159	-25.809	64.842			-46.584	130.638	-94.665	50.502	-40.839	41.729	10.7152	59.5436	5.63973	80.2552	-114.323	78.8743	6.86823	85.4763	-25.7871
692	46.3236	63.0857	16.12	67.704	-47.101	249.592	-100.185	94.161	48.308	111.613	-222.374	258.628	7.445	121.133	-100.706	112.825	210.846	-26.713	51.568	90.004	-88.723	34.125	-38.02	123.171	-61.721	30.263	-61.265	54.986	36.948	156.684	-26.029	65.077			-45.426	131.229	-96.681	50.799	-42.327	42.867	12.3601	59.4867	7.21403	82.7941	-116.983	78.3192	9.64373	89.4735	-28.731
693	47.4429	65.1173	17.732	66.092	-47.954	249.591	-101.125	93.989	47.983	110.858	-221.672	259.897	7.476	120.586	-102.188	111.832	211.126	-27.362	50.945	89.565	-88.723	31.85	-33.02	122.001	-61.735	32.094	-61.464	54.177	38.176	153.954	-26.41	65.338			-45.261	129.899	-94.904	51.011	-42.065	43.277	10.6311	59.2251	5.04823	79.9458	-115.311	77.5434	8.16042	84.7324	-29.6342
694	48.4188	67.2968	16.12	67.704	-47.864	250.354	-101.535	93.673	49.035	113.229	-222.132	259.35	7.925	123.217	-99.907	111.386	211.004	-27.245	52.801	89.95	-88.723	31.85	-35.845	123.504	-60.488	30.169	-61.826	54.124	37.337	154.149	-26.628	65.738			-45.241	129.782	-100.803	52.297	-43.111	42.665	10.8768	59.4981	7.62353	80.3735	-118.295	75.6096	3.37838	84.6482	-31.1925
695	44.4285	62.3236	16.12	67.704	-47.52	250.589	-100.983	93.469	47.988	121.312	-222.815	258.335	3.569	122.923	-98.755	111.792	210.187	-27.492	53.092	89.359	-86.448	34.125	-31.69	123	-64.319	34.448	-62.136	53.922	37.478	153.951	-26.245	65.533			-44.269	129.283	-96.308	51.377	-41.369	42.45	11.6844	60.8267	6.00145	79.7774	-117.938	73.4802	4.7411	85.0122	-27.987
696	46.5943	65.3653	16.12	69.316	-47.253	249.437	-100.276	93.428	48.655	115.852	-223.249	257.055	11.005	121.872	-98.941	112.226	209.685	-27.354	53.268	89.421	-88.723	34.125	-32.009	119.557	-59.904	32.474	-62.215	54.681	37.459	152.476	-26.638	65.822			-43.14	129.729	-99.674	51.26	-41.851	40.412	11.6184	63.2768	5.4236	81.85	-119.872	71.6261	1.2376	86.8163	-26.3672
697	44.5718	62.2849	17.732	67.704	-46.807	250.494	-99.9	93.718	46.366	114.183	-224.774	253.54	10.879	122.046	-99.946	112.518	208.809	-27.65	52.677	87.822	-90.998	34.125	-34.891	121.307	-55.684	34.415	-63.442	52.637	37.862	149.877	-25.925	64.069			-42.369	129.2	-95.531	51.846	-43.698	41.361	10.3012	62.1598	4.83438	80.3553	-121.046	70.1314	-2.70725	84.7665	-22.3087
698	45.3612	63.0789	17.732	67.704	-47.228	250.037	-100.511	93.17	45.551	112.827	-225	252.575	6.737	123.537	-98.791	111.871	208.89	-27.275	53.702	87.165	-88.723	34.125	-37.167	122.186	-59.715	33.27	-63.721	52.661	36.183	151.68	-27.2	64.268			-41.247	130.587	-93.979	51.16	-41.624	40.362	11.623	65.5996	3.45345	79.1564	-118.653	70.7184	1.98835	89.5167	-25.4391
699	47.022	63.3042	19.344	67.704	-46.914	250.136	-100.855	93.712	44.28	114.426	-226.022	251.673	7.939	120.686	-98.771	113.01	209.477	-27.268	55.655	86.789	-88.723	34.125	-35.138	122.652	-59.214	34.052	-62.463	52.3	37.872	150.854	-26.329	63.222			-41.278	129.384	-88.569	52.928	-40.75	41.495	10.5264	64.7237	7.9261	80.3416	-119.84	69.7447	6.3973	91.4641	-24.0627
700	47.9434	65.925	17.732	67.704	-47.191	249.433	-100.432	93.42	42.523	115.003	-227.584	250.803	8.09	120.528	-101.708	113.266	209.839	-26.519	54.766	86.437	-88.723	29.575	-32.738	120.555	-59.768	32.621	-62.685	52.191	37.357	151.045	-27.029	63.372			-40.5	130.085	-90.619	53.417	-40.47	42.094	11.805	64.1868	4.89808	80.9559	-119.46	69.1941	9.7279	95.864	-21.9173
701	46.8582	60.6219	17.732	67.704	-47.12	249.754	-100.121	93.751	40.447	117.149	-228.964	250.308	3.28	121.794	-99.847	114.443	209.82	-26.958	54.678	87.04	-86.448	34.125	-33.668	121.481	-58.463	32.855	-62.735	51.92	38.018	150.278	-27.647	62.258			-40.776	129.12	-89.944	53.615	-39.894	40.994	12.6422	62.6853	2.86878	77.4501	-120.191	69.8925	18.3615	104.234	-25.728
702	46.7194	66.8099	19.344	67.704	-46.341	248.191	-98.898	92.961	40.378	117.399	-229.68	249.384	4.852	122.135	-97.216	110.561	210.512	-26.464	54.731	87.839	-86.448	31.85	-30.133	118.573	-55.692	36.275	-62.269	52.217	37.223	150.817	-27.253	63.695			-41.004	129.367	-87.191	54.065	-42.981	38.507	13.2155	62.1871	3.77423	78.1872	-120.409	69.5376	5.2416	93.5981	-25.5756
703	48.1572	65.8067	19.344	66.092	-48.017	246.934	-99.172	93.053	38.541	117.353	-230.633	249.261	3.777	122.284	-99.421	109.732	210.254	-26.511	54.416	87.655	-86.448	34.125	-33.476	118.973	-55.6	35.798	-62.073	51.682	40.631	150.927	-27.837	63.6			-39.446	129.202	-87.905	53.38	-41.671	39.698	15.2106	61.0974	0.87815	79.1768	-120.841	67.1421	8.57675	96.6352	-26.4401
704	49.2833	66.819	19.344	67.704	-48.204	247.261	-99.384	94.236	36.418	118.926	-231.723	250.267	5.813	120.495	-99.794	112.319	209.893	-27.014	54.383	88.171	-86.448	34.125	-32.535	121.156	-55.988	36.514	-61.908	51.076	39.684	151.293	-29.52	63.931			-40.102	128.066	-86.652	54.507	-41.918	39.278	14.7602	60.0827	2.68223	77.0315	-122.284	69.3306	18.3046	106.017	-26.5993
705	48.5007	65.8908	20.956	67.704	-48.096	247.001	-99.013	94.193	36.068	117.365	-231.022	249.968	2.422	124.051	-101.539	113.829	210.527	-27.041	52.936	87.726	-88.723	34.125	-36.049	120.153	-58.239	37.749	-61.343	51.955	40.123	150.055	-29.371	63.687			-42.104	128.397	-83.362	53.21	-43.61	38.91	15.1424	60.7243	0.884975	78.0621	-121.005	68.6618	18.1545	106.529	-24.2242
706	48.7624	64.2869	19.344	66.092	-47.209	247.429	-98.995	93.747	35.607	116.983	-232.087	249.175	3.765	128.781	-99.597	112.587	210.241	-25.989	52.106	86.845	-88.723	31.85	-33.67	117.461	-57.372	38.493	-61.44	52.191	40.48	150.989	-29.391	65.174			-42.847	129.077	-83.203	54.188	-41.572	39.492	15.0104	58.9544	2.70953	77.896	-122.445	67.8792	20.0359	107.942	-27.7755
707	48.8283	65.7452	19.344	66.092	-48.138	247.349	-98.282	94.661	35.738	118.116	-233.04	248.674	2.762	125.349	-99.517	110.488	208.516	-25.977	51.722	86.23	-88.723	34.125	-31.28	115.787	-58.48	37.142	-62.455	51.789	41.335	149.872	-29.127	65.526			-44.259	129.294	-83.996	53.825	-44.818	40.238	15.7566	58.6472	3.3033	75.8803	-124.044	66.6712	15.9864	103.012	-26.4378
708	47.4565	66.3208	19.344	67.704	-49.194	247.357	-98.795	93.978	34.102	117.554	-234.13	247.821	1.651	123.467	-100.463	112.003	208.433	-26.39	51.335	86.126	-86.448	34.125	-31.952	117.421	-56.909	38.715	-62.562	51.663	42.773	150.065	-28.842	65.762			-44.322	129.032	-81.695	53.089	-43.749	40.234	14.7397	57.8851	1.45828	76.5833	-125.48	68.9575	24.9113	111.209	-28.2077
709	48.9398	67.1785	20.956	66.092	-49.744	247.019	-99.677	93.521	33.121	116.251	-235.79	247.16	0.666	123.966	-100.479	110.813	208.123	-26.518	49.219	85.908	-86.448	34.125	-33.169	115.918	-58.699	36.735	-62.596	51.766	43.696	150.448	-29.154	67.275			-45.32	129.311	-75.997	53.969	-45.625	39.117	15.0924	60.4445	1.02148	77.9256	-127.589	67.5175	19.4717	101.417	-26.8632
710	46.4373	60.3171	20.956	67.704	-49.707	248.04	-99.705	94.25	33.429	116.309	-234.971	247.196	4.372	124.317	-99.603	110.73	207.216	-25.566	49.851	88.174	-86.448	34.125	-33.92	116.125	-56.115	41.063	-62.237	50.959	44.588	150.599	-27.416	66.377			-46.084	130.303	-76.788	53.522	-43.906	37.652	14.4121	60.2352	-2.45472	76.2876	-128.945	67.2217	23.2892	101.51	-23.5667
711	51.5879	62.8924	22.568	67.704	-47.286	247.834	-98.857	94.191	35.165	114.584	-236.569	246.034	5.612	122.492	-97.36	111.524	207.691	-25.904	50.133	85.923	-86.448	31.85	-33.452	118.338	-54.336	38.422	-61.69	51.293	43.176	150.532	-27.164	67.12			-44.256	129.204	-74.74	53.877	-45.258	39.418	14.8899	62.36	0.5551	76.7267	-129.052	66.5392	24.8453	101.488	-27.4752
712	47.0766	64.0162	19.344	67.704	-49.651	247.751	-98.11	94.531	34.399	115.129	-235.443	246.72	4.285	124.843	-99.535	111.884	208.118	-24.473	50.16	85.734	-86.448	31.85	-33.09	118.377	-54.619	38.543	-61.814	50.488	42.792	148.974	-27.035	67.193			-43.058	129.697	-75.844	53.919	-47.569	42.471	13.7956	61.1474	-1.34225	76.5128	-129.461	67.3355	26.6812	101.747	-26.82
713	44.3511	62.9902	20.956	67.704	-47.335	247.942	-98.903	95.081	33.838	115.176	-238.386	246.354	5.37	123.201	-99.566	112.13	208.422	-23.98	50.206	84.488	-88.723	31.85	-30.853	117.638	-55.353	37.73	-61.048	51.499	43.866	148.967	-26.883	68.494			-41.252	129.751	-75.398	54.054	-43.117	39.484	12.8378	62.5739	-1.35135	78.0666	-129.771	66.7326	27.5571	101.579	-31.9569
714	46.4851	64.1027	19.344	66.092	-47.729	247.807	-98.845	95.58	33.237	117.917	-237.83	245.941	4.303	122.375	-99.193	113.755	208.632	-24.837	48.296	86.355	-84.173	31.85	-33.87	116.567	-59.177	38.804	-60.809	51.684	44.442	151.164	-26.446	67.951			-40.722	130.667	-76.456	52.211	-45.33	38.323	14.5418	62.9447	1.18983	78.0484	-131.581	66.132	30.4805	102.339	-27.0861
715	45.8299	63.9093	19.344	67.704	-46.795	248.202	-99.147	94.965	33.257	119.31	-238.387	245.073	4.192	122.39	-97.2	111.889	208.173	-24.252	48.872	85.069	-84.173	31.85	-34.401	116.993	-54.919	38.517	-61.564	51.663	44.223	149.8	-27.702	67.744			-40.448	130.18	-74.48	54.039	-46.061	39.605	13.7296	63.0948	-0.3913	77.2067	-131.49	64.7397	31.1174	105.185	-25.6552
716	48.892	59.8052	19.344	67.704	-43.723	248.724	-97.896	95.053	34.558	117.348	-238.004	245.752	5.811	121.444	-98.753	111.557	208.441	-24.684	47.672	87.454	-81.898	34.125	-34.166	118.053	-56.35	38.095	-61.408	51.656	45.086	148.201	-27.279	67.448			-39.873	130.912	-74.779	53.331	-44.196	38.878	14.5896	62.8082	1.38775	77.466	-132.81	65.1333	31.7067	104.529	-28.8379
717	47.2813	65.4654	17.732	66.092	-43.557	249.01	-98.208	95.281	34.931	117.238	-236.07	245.713	13.172	117.954	-96.658	110.733	208.066	-24.016	48.228	85.797	-84.173	27.3	-32.947	118.677	-57.385	31.552	-61.437	51.237	44.51	147.988	-27.323	67.196			-40.648	130.975	-75.876	53.435	-46.722	39.321	13.1814	63.9844	1.54473	77.5206	-132.228	66.3754	32.3596	103.399	-29.4408
718	45.7002	65.6997	19.344	67.704	-46.503	249.246	-98.398	94.732	35.079	115.88	-236.817	244.829	8.223	118.565	-97.51	111.672	209.312	-23.159	48.221	84.696	-86.448	34.125	-26.767	119.322	-56.469	37.426	-60.571	51.214	44.438	147.235	-26.506	68.013			-40.837	132.469	-73.67	52.567	-45.611	38.165	13.2541	64.5668	0.712075	76.5401	-134.762	60.9882	32.2914	105.032	-28.9881
719	47.7341	65.0627	19.344	67.704	-46.662	249.682	-97.781	95.35	35.231	116.601	-235.603	246.125	10.521	117.581	-97.614	113.488	209.013	-24.513	48.64	84.076	-84.173	29.575	-30.675	119.117	-56.793	35.127	-60.634	51.889	41.831	147.103	-26.472	67.642			-41.233	133.511	-75.282	53.416	-43.406	36.916	14.0459	65.0673	-0.561925	74.9158	-133.313	63.4452	33.5062	105.847	-25.6574
720	45.0154	63.7341	17.732	66.092	-45.088	249.569	-98.145	95.132	35.465	116.596	-234.554	245.281	10.713	118.227	-99.207	112.051	209.258	-23.747	49.082	84.954	-86.448	29.575	-34.323	119.726	-55.161	36.904	-60.973	53.464	44.079	148.107	-26.153	67.961			-42.297	136.205	-77.82	48.443	-43.461	35.981	14.0914	63.6727	-2.32732	76.2785	-134.159	62.7354	32.4688	106.864	-26.4969
721	44.3511	61.2316	19.344	67.704	-44.759	248.702	-98.904	94.41	34.83	116.251	-234.656	246.121	12.919	117.565	-99.597	112.604	209.355	-24.027	48.685	84.65	-86.448	31.85	-31.87	118.518	-55.394	38.162	-60.654	53.39	42.533	147.569	-25.608	67.986			-42.503	137.498	-80.753	48.304	-41.256	38.316	15.0059	65.1924	-1.23987	76.7289	-136.063	58.8997	34.5504	108.062	-29.1086
722	46.112	62.6194	19.344	69.316	-46.617	249.206	-99.033	94.695	35.737	113.601	-233.292	245.548	14.662	115.234	-99.316	114.599	209.706	-23.545	49.048	84.077	-88.723	31.85	-30.882	119.59	-58.116	35.71	-60.828	53.413	43.33	148.242	-25.464	65.412			-41.057	138.254	-77.885	46.361	-44.2	39.973	13.0471	65.545	-2.71635	75.6301	-137.66	58.8383	32.2732	101.069	-24.8589
723	47.9911	65.5246	19.344	67.704	-46.877	249.503	-99.746	94.327	35.497	112.617	-230.763	244.776	11.326	116.528	-99.475	113.159	209.076	-24.475	48.574	84.372	-84.173	29.575	-33.099	118.99	-57.817	35.18	-59.931	54.398	40.048	148.737	-25.033	65.185			-40.757	141.348	-79.77	45.913	-43.543	37.647	14.3484	65.09	0.962325	73.9079	-136.962	59.4321	33.0808	105.969	-27.1316
724	45.045	62.7331	19.344	67.704	-47.497	249.861	-100.12	94.261	34.545	113.205	-228.005	244.176	13.072	117.907	-100.387	112.123	208.687	-24.476	48.999	83.478	-84.173	27.3	-34.309	118.747	-58.572	33.585	-59.692	53.89	39.64	149.7	-24.209	64.482			-40.622	139.395	-77.966	45.216	-44.477	41.173	13.0312	64.6327	0.2366	74.8816	-136.532	60.1123	32.8806	107.46	-29.0017
725	46.8172	63.2382	19.344	66.092	-46.395	249.532	-100.576	93.294	35.451	114.131	-225.643	244.017	12.015	115.338	-99.246	112.491	208.332	-23.684	49.585	82.696	-86.448	31.85	-33.037	117.911	-56.285	34.165	-60.571	54.452	40.087	149.768	-24.781	64.372			-40.637	146.555	-76.756	44.455	-46.25	43.134	13.3133	64.8693	0.156975	74.7588	-136	61.0746	32.9625	107.719	-27.4365
726	45.839	65.5018	19.344	67.704	-43.889	250.049	-99.536	93.407	36.013	114.526	-225.083	244.981	13.269	115.726	-98.238	111.193	207.537	-24.009	48.77	82.539	-81.898	31.85	-31.671	120.178	-56.396	36.163	-60.487	53.896	39.891	150.373	-22.839	64.948			-41.081	139.97	-75.877	44.114	-45.295	41.913	13.7274	63.6113	0.038675	75.9031	-138.272	57.1048	32.1458	110.993	-27.0725
727	46.9219	65.0195	17.732	67.704	-42.448	250.033	-99.284	92.641	36.673	114.683	-224.186	245.735	13.59	114.986	-97.936	111.573	207.913	-24.148	47.902	82.47	-86.448	27.3	-33.538	117.754	-58.239	32.575	-60.394	53.664	40.776	149.628	-23.347	64.892			-39.554	137.529	-78.038	44.121	-44.562	40.11	14.5145	65.1332	0.9828	73.776	-136.525	57.7805	31.6839	109.528	-28.7583
728	46.542	65.404	19.344	67.704	-40.828	249.74	-98.362	92.786	37.251	114.289	-223.832	246.089	12.116	114.525	-98.24	112.312	207.294	-24.186	48.853	81.731	-84.173	29.575	-30.115	120.004	-58.438	35.578	-59.831	52.886	40.962	147.887	-22.719	64.954			-38.412	140.518	-85.337	48.61	-42.996	42.067	15.2652	65.1514	1.2467	72.3973	-137.483	58.5949	31.8841	107.851	-27.1453
729	45.1087	64.105	19.344	67.704	-37.889	249.737	-97.673	93.177	36.706	114.716	-223.134	246.216	14.881	117.3	-99.367	113.671	207.875	-23.392	46.967	82.541	-86.448	29.575	-31.301	119.343	-58.531	34.824	-60.978	52.101	40.63	148.433	-23.681	64.814			-38.208	139.679	-91.883	46.593	-47.728	41.876	15.5747	64.221	1.4469	75.2593	-137.371	59.1591	29.2884	111.784	-27.639
730	47.3746	63.9571	17.732	67.704	-36.465	249.726	-98.889	92.274	36.392	114.499	-222.906	246.86	14.029	117.02	-99.652	112.739	208.475	-23.332	47.222	81.704	-84.173	22.75	-32.391	119.197	-57.036	37.062	-61.149	51.857	43.571	147.97	-22.61	66.203			-38.532	140.299	-93.557	46.305	-43.315	42.64	15.3017	64.6532	-0.216125	73.9921	-136.966	59.853	29.9822	108.499	-27.3705
731	47.2154	63.1858	19.344	67.704	-35.384	249.763	-98.683	92.797	37.407	113.931	-221.504	246.398	12.728	117.209	-99.221	113.586	206.989	-22.895	45.958	82.361	-84.173	29.575	-32.178	121.564	-56.404	34.583	-60.894	51.76	43.79	147.599	-23.288	66.531			-38.56	139.142	-97.104	47.822	-45.939	43.114	14.8535	65.6383	1.65848	76.0942	-139.005	60.8927	32.5621	120.486	-27.7027
732	47.1653	61.1042	19.344	66.092	-35.036	249.949	-98.79	92.122	37.313	114.472	-220.057	247.994	14.422	117.298	-99.493	113.334	207.115	-23.088	47.116	80.583	-81.898	18.2	-34.063	119.351	-58.326	37.119	-60.858	52.837	42.618	147.328	-22.322	66.361			-38.67	140.116	-97.446	48.071	-43.809	44.574	16.8282	63.8843	0.493675	72.7704	-138.518	56.4337	27.4843	112.531	-25.8212
733	45.7571	60.879	19.344	66.092	-34.463	250.193	-99.63	91.596	37.046	114.12	-221.439	248.996	15.639	119.444	-100.147	111.73	208.101	-23.732	45.178	80.482	-86.448	27.3	-29.188	117.855	-57.22	36.73	-61.337	52.548	42.217	149.274	-23.644	66.813			-38.496	142.765	-98.804	45.944	-43.859	43.111	15.7589	64.0276	-0.5187	74.6268	-140.538	55.1324	28.0007	113.923	-26.5788
734	46.0392	64.6737	19.344	67.704	-34.597	249.748	-99.846	90.909	35.463	113.588	-219.612	249.323	12.19	121.206	-101.362	113.396	209.394	-24.506	47.62	80.01	-86.448	27.3	-30.061	117.123	-56.494	38.436	-60.893	52.475	41.912	148.734	-23.853	67.079			-39.645	139.158	-101.923	46.544	-42.095	43.655	17.3378	63.5248	1.30358	72.4565	-142.026	55.1028	27.3068	111.916	-26.6243
735	46.3304	64.3893	19.344	67.704	-34.29	249.739	-100.956	91.05	35.594	114.598	-219.775	249.148	12.89	121.072	-99.59	112.022	208.743	-24.379	47.254	79.318	-84.173	20.475	-29.462	118.999	-59.294	38.934	-60.681	52.762	40.922	150.324	-25.139	68.085			-40.123	143.866	-101.629	46.387	-45.519	43.787	18.2273	64.0867	-0.011375	74.4949	-141.541	55.7648	27.1817	117.376	-28.069
736	47.6977	66.5392	19.344	69.316	-33.244	248.957	-100.039	90.063	36.795	114.085	-220.233	250.713	14.85	121.67	-99.697	113.81	207.491	-23.698	46.643	79.92	-84.173	25.025	-34.683	121.559	-55.997	36.069	-60.751	52.252	43.709	150.083	-26.054	67.687			-40.005	140.231	-103.514	45.582	-41.487	44.05	17.9133	64.2574	1.9929	72.7067	-140.322	59.0272	26.4309	119.058	-25.1069
737	45.7411	65.1242	19.344	66.092	-32.14	249.732	-99.476	90.829	37.842	114.387	-219.952	250.178	12.173	121.186	-99.825	111.711	207.116	-23.656	47.148	78.766	-86.448	27.3	-32.356	118.46	-59.022	36.61	-61.233	51.126	44.27	150.949	-25.467	67.081			-40.796	138.342	-100.741	45.509	-39.877	43.256	19.0804	65.9295	-0.42315	75.4822	-143.464	53.6491	25.0591	109.812	-26.6676
738	48.23	66.2503	19.344	67.704	-32.389	250.05	-99.756	90.311	38.842	113.959	-219.624	249.272	9.888	121.589	-98.551	111.161	206.806	-24.138	45.557	79.432	-84.173	15.925	-30.902	116.445	-55.318	38.835	-61.745	51.807	44.401	151.716	-24.934	68.528			-38.54	140.467	-102.519	45.405	-44.338	43.409	16.9806	65.9955	1.34453	75.8098	-139.451	57.1457	29.1154	127.152	-29.8821
739	46.1825	63.7614	19.344	67.704	-32.379	250.204	-100.513	89.748	39.141	115.303	-221.01	251.732	11.396	121.444	-98.811	111.651	207.194	-23.791	46.543	77.943	-84.173	22.75	-31.495	117.993	-55.317	40.211	-62.535	51.223	44.251	150.55	-24.967	67.459			-36.624	140.3	-101.284	43.898	-37.101	41.658	18.3365	66.4163	-0.343525	74.413	-142.16	52.1089	24.5086	103.451	-27.5502
740	46.0506	67.2672	16.12	67.704	-31.874	250.148	-100.832	89.175	40.123	115.637	-219.578	252.153	12.674	121.215	-100.005	111.996	208.615	-23.647	44.773	79.045	-88.723	27.3	-29.768	117.447	-56.624	40.559	-61.975	52.729	45.139	152.348	-25.808	68.233			-36.081	143.311	-102.676	43.763	-42.861	42.768	18.7574	67.208	1.36045	72.8682	-141.125	54.8548	28.8334	127.382	-24.3652
741	46.1256	64.0981	19.344	67.704	-32.303	250.025	-100.49	88.855	40.366	118.13	-219.543	250.609	13.369	121.662	-101.24	112.255	209.715	-25.129	44.692	78.185	-86.448	25.025	-28.34	116.904	-57.419	38.92	-61.572	52.43	44.482	152.425	-26.604	67.882			-36.262	140.664	-101.847	44.155	-43.215	42.549	20.2703	64.2756	1.52198	72.4041	-142.367	53.235	24.7975	113.252	-23.6031
742	45.2475	62.0711	17.732	69.316	-32.811	248.991	-101.08	88.694	39.987	118.441	-218.527	253.437	12.189	120.488	-100.122	112.996	209.859	-24.763	46.157	76.7	-86.448	20.475	-32.443	118.659	-52.425	41.067	-62.39	53.329	43.488	151.51	-26.29	68.489			-35.229	149.053	-98.473	41.841	-41.065	43.946	20.3044	62.9856	1.03285	73.0889	-141.755	53.0189	25.0637	117.151	-26.1579
743	46.7217	62.3236	17.732	69.316	-33.383	249.584	-101.278	89.231	40.452	118.63	-218.528	253.07	11.105	121.228	-100.259	113.265	209.89	-25.623	45.662	79.698	-86.448	20.475	-32.731	116.744	-53.441	42.122	-63.148	53.366	43.955	150.05	-26.427	68.308			-35.229	149.053	-94.835	39.862	-38.86	42.802	20.5114	62.9242	3.36928	72.0083	-142.001	53.5717	25.6757	121.496	-27.1135
744	43.771	62.426	17.732	69.316	-35.576	248.969	-102.472	88.093	38.772	119.36	-218.451	254.935	11.786	119.605	-101.447	114.216	210.208	-24.97	45.794	78.387	-84.173	18.2	-29.546	117.904	-54.004	42.801	-62.946	54.639	45.219	151.007	-25.344	69.758			-35.229	149.053	-94.609	39.588	-42.689	41.97	20.0155	62.5443	2.79143	74.215	-142.137	54.368	25.9532	113.529	-23.8852
745	46.8559	64.2528	17.732	66.092	-38.271	249.842	-102.567	88.67	38.393	119.745	-216.719	256.521	16.02	119.473	-100.352	112.709	210.657	-25.343	45.481	77.387	-86.448	22.75	-31.215	117.426	-55.425	42.211	-62.001	54.321	45.01	150.508	-26.405	69.068			-32.954	149.053	-93.636	39.635	-38.681	43.479	21.1939	62.4806	4.05178	73.7555	-144.874	53.1895	28.4511	124.488	-27.8915
746	50.0113	71.2029	17.732	69.316	-37.834	248.823	-103.163	87.999	39.11	118.702	-217.611	257.208	15.887	117.764	-98.451	111.302	210.915	-26.32	45.978	76.95	-86.448	20.475	-27.434	112.839	-55.796	37.718	-61.173	54.654	44.155	150.697	-27.491	69.763			-32.954	149.053	-93.262	40.187	-37.016	41.223	22.1676	62.6307	-0.65065	75.6028	-143.348	53.2555	32.5962	130.628	-25.8508
747	46.0346	63.9412	17.732	69.316	-34.82	249.084	-102.264	88.713	39.664	119.502	-215.99	258.931	15.6	117.825	-100.012	112.809	210.47	-26.559	43.618	78.126	-86.448	18.2	-28.658	112.438	-54.747	38.956	-61.016	54.91	44.29	151.345	-27.038	69.98			-32.954	149.053	-95.223	39.147	-39.384	42.347	23.5599	62.4351	3.36245	75.4549	-143.377	53.715	29.4362	121.096	-25.7029
748	45.6615	64.4235	17.732	69.316	-33.51	249.169	-100.883	88.822	40.834	118.623	-216.131	260.03	18.536	116.938	-98.401	111.889	210.797	-25.681	45.345	75.506	-88.723	25.025	-26.763	112.225	-55.824	40.894	-60.819	55.632	44.201	152.135	-27.368	71.034			-32.954	149.053	-95.557	37.736	-40.192	41.055	23.8739	61.7071	3.1941	74.8566	-143.284	54.5204	28.8834	127.311	-30.2825
749	46.3804	67.8997	19.344	67.704	-34.143	249.282	-100.479	89.27	41.656	118.037	-215.807	260.904	16.322	115.242	-98.755	112.375	210.397	-26.926	45.279	76.756	-86.448	13.65	-27.961	109.807	-57.432	40.745	-60.674	55.744	43.12	150.799	-25.738	70.146			-32.954	149.053	-95.101	39.432	-42.046	42.195	23.5667	60.0577	-0.730275	73.4143	-148.555	50.8872	29.8867	123.257	-28.9858
750	44.8471	67.5539	17.732	67.704	-32.865	249.69	-100.42	89.68	42.739	117.549	-214.431	262.358	15.642	115.391	-97.618	112.802	210.481	-26.839	45.015	76.584			-27.475	111.653	-58.839	39.709	-60.87	56.426	41.37	150.072	-26.014	70.194			-32.954	149.053	-95.923	37.72	-43.074	43.687	24.8384	60.0918	2.7482	72.9615	-148.51	49.438	29.1951	121.749	-29.3657
751	46.4714	67.8041	19.344	69.316	-32.615	249.534	-100.465	89.663	42.265	117.211	-213.881	263.899	16.306	115.618	-98.469	114.842	209.585	-26.427	46.649	76.115			-23.639	111.765	-52.387	39.951	-60.905	55.859	41.212	150.918	-25.457	71.109			-35.229	149.053	-95.555	35.73	-37.133	42.629	26.9952	58.902	1.64482	75.3389	-149.429	49.9772	32.0934	124.413	-28.5967
752	48.71	69.1805	19.344	69.316	-32.757	249.022	-100.004	89.236	42.124	116.561	-214.149	264.982	15.564	116.147	-97.606	112.18	209.776	-26.261	47.338	76.321			-23.825	109.672	-56.755	42.745	-60.863	55.484	40.786	150.429	-24.531	70.559			-35.229	149.053	-92.76	40.567	-32.506	40.614	26.8177	57.6075	2.63218	74.1263	-150.145	51.6903	31.2153	121.221	-32.5803
753	46.2417	66.5051	17.732	67.704	-32.498	248.796	-99.287	89.364	42.28	115.722	-213.162	265.914	16.801	118.605	-97.344	112.014	210.309	-26.208	47.651	76.263			-22.655	110.083	-55.289	43.331	-62.121	53.973	41.979	150.194	-23.864	70.757			-35.229	149.053	-92.447	40.501	-41.034	41.43	26.6744	57.3664	0.125125	74.0262	-150.917	47.8751	30.7466	123.378	-30.3349
754	47.6703	68.1749	17.732	66.092	-33.582	248.879	-99.41	88.902	42.208	114.459	-212.956	269.81	15.116	117.676	-98.387	110.185	211.712	-26.612	48.391	76.178			-21.674	106.385	-55.585	41.714	-62.423	52.694	41.046	149.915	-24.598	69.481			-37.504	149.053	-91.933	40.384	-36.092	41.559	26.8882	58.2081	0.898625	73.8055	-152.557	50.4186	29.7069	119.881	-27.4706
755	47.5725	70.0018	17.732	67.704	-34.966	248.841	-99.225	88.462	42.047	113.399	-212.879	272.304	13.493	118.705	-98.35	112.549	211.822	-26.203	48.92	75.942			-20.971	111.285	-54.16	40.388	-62.906	52.788	41.931	149.803	-23.795	69.701			-37.504	149.053	-91.175	41.72	-39.167	42.293	25.5824	56.8886	2.62535	75.803	-151.194	48.8966	31.5975	117.592	-29.6979
756	46.5988	65.3858	16.12	66.092	-36.054	249.333	-99.846	88.335	43.186	112.383	-213.252	274.408	12.948	118.854	-98.481	112.594	212.281	-26.46	49.361	73.673			-22.179	110.555	-54.1	43.545	-62.894	52.321	41.463	150.496	-23.51	69.685			-37.504	149.053	-90.488	41.373	-39.211	42.628	25.505	57.5916	3.11448	75.6233	-149.891	50.2639	29.732	120.646	-28.0985
757	47.2154	65.4427	19.344	67.704	-37.416	249.638	-100.341	87.968	43.875	112.227	-212.076	276.267	13.252	120.517	-97.317	111.755	213.044	-26.341	50.835	73.691			-21.392	110.054	-52.944	39.793	-62.487	53.176	43.173	151.309	-24.131	70.119			-37.504	149.053	-93.075	41.047	-39.645	41.373	25.7507	57.7008	0.994175	73.2436	-151.19	50.0022	31.8159	122.133	-33.5062
758	45.359	64.8034	17.732	67.704	-37.423	250.13	-101.304	87.859	42.837	112.71	-212.192	275.989	11.869	120.897	-97.448	110.688	212.237	-26.285	51.31	72.869			-18.387	110.316	-52.901	43.163	-61.533	53.1	42.175	150.828	-23.833	69.76			-37.504	149.053	-91.215	42.193	-39.179	41.443	25.7598	56.8363	0.04095	74.777	-151.413	49.6724	32.8806	120.432	-29.4499
759	48.3915	70.8981	19.344	66.092	-36.513	249.584	-102.007	86.863	41.33	111.545	-213.536	277.412	11.709	118.846	-97.469	113.501	212.531	-26.299	51.902	73.348			-16.874	111.161	-54.38	45.808	-61.135	53.958	43.984	152.33	-24.377	71.09			-37.504	149.053	-92.088	41.303	-38.597	41.09	24.7884	56.4336	2.4752	71.683	-149.979	51.7562	31.0833	118.541	-32.1389
760	46.0369	65.8021	19.344	67.704	-38.134	249.29	-101.479	85.972	40.149	112.161	-212.091	278.055	14.267	118.749	-97.785	111.385	213.106	-26.083	50.76	74.237			-19.166	112.075	-51.453	40.928	-60.04	52.618	43.928	151.52	-25.643	69.126			-37.504	149.053	-93.42	44.36	-40.609	41.813	25.1433	56.9182	-1.23532	74.686	-152.036	52.3955	32.0252	119.478	-33.0831
761	44.631	63.3269	19.344	64.48	-37.725	249.794	-100.309	85.474	41.329	112.09	-211.834	278.195	14.194	116.334	-98.883	113.236	212.102	-26.196	50.352	74.621			-17.621	110.745	-53.919	42.672	-60.782	52.44	44.803	152.581	-26.138	69.506			-37.504	149.053	-93.267	45.711	-37.094	39.414	22.7705	56.8113	-1.05105	72.8523	-151.49	52.8869	29.2519	122.7	-32.6394
762	44.6128	69.565	17.732	67.704	-39.246	250.322	-100.578	85.756	41.154	110.393	-211.231	278.887	18.553	118.812	-98.666	111.522	212	-26.591	50.639	72.587			-18.344	112.705	-51.321	41.47	-60.636	51.381	44.098	151.842	-26.503	69.236			-37.504	149.053	-93.823	48.017	-37.852	40.605	24.4585	56.5406	1.092	74.4198	-152.9	51.4446	31.1834	120.823	-34.2206
763	47.2062	70.4408	19.344	66.092	-38.627	251.155	-100.41	85.63	41.135	110.185	-211.777	278.707	19.297	116.899	-97.689	111.984	210.7	-26.515	50.736	73.406			-20.543	111.162	-54.244	42.945	-61.428	51.298	42.198	150.799	-26.928	69.324			-37.504	149.053	-95.703	48.621	-37.269	40.491	23.8101	56.6043	-0.65065	75.6733	-152.254	53.1986	29.2133	119.847	-35.4013
764	46.4236	66.5574	17.732	64.48	-38.104	250.97	-100.133	85.389	40.83	109.965	-210.973	279.669	16.666	117.448	-97.283	111.991	209.786	-26.508	52.358	74.571			-17.539	113.15	-49.317	45.698	-62.229	51.629	43.878	152.689	-26.856	69.506			-37.504	149.053	-94.738	49.892	-34.729	41.173	23.0662	56.8795	0.34125	72.4087	-153.06	52.2477	29.7911	118.985	-34.0181
765	47.0311	71.6147	16.12	64.48	-38.706	251.431	-100.42	84.605	39.97	110.019	-212.066	279.105	17.81	118.102	-98.822	113.998	211.144	-26.279	51.452	74.873			-18.541	112.971	-47.419	44.722	-62.226	52.426	45.133	151.958	-26.881	69.58			-37.504	149.053	-94.504	49.273	-32.855	40.779	21.9583	57.7964	0.061425	72.3359	-154.839	50.6074	31.9842	120.523	-34.489
766	46.178	66.0797	17.732	62.868	-37.589	250.656	-101.082	85.236	39.516	109.895	-211.76	278.708	16.784	116.955	-99.453	111.142	211.14	-26.589	52.427	74.025			-18.219	112.77	-52.643	46.732	-62.135	53.285	46.508	152.308	-25.79	69.72			-37.504	149.053	-92.73	49.179	-37.718	39.852	21.5807	57.7008	-2.3023	73.4029	-153.255	52.9188	34.4958	119.599	-38.3246
767	47.2813	68.473	19.344	64.48	-35.898	251.069	-99.356	85.989	38.804	109.059	-212.233	277.906	15.306	118.938	-97.611	112.808	211.403	-26.533	51.605	75.587			-15.376	112.72	-49.127	44.684	-63.058	53.847	45.319	153.016	-25.477	69.057			-37.504	149.053	-91.854	46.588	-42.243	38.871	23.2255	58.2673	-1.20802	72.9024	-154.775	51.8336	38.5749	122.602	-31.6976
768	46.6307	67.3309	16.12	62.868	-35.942	251.23	-99.31	86.139	38.453	108.483	-212.616	277.867	18.207	117.75	-98.516	110.933	211.759	-26.735	50.984	74.841			-18.206	113.283	-48.856	44.502	-63.082	54.402	46.278	153.4	-24.229	68.357			-37.504	149.053	-89.609	46.983	-35.566	38.572	22.1813	59.539	-0.728	74.777	-154.991	50.6188	39.7943	121.196	-37.3077
769	46.5556	70.368	16.12	61.256	-37.205	251.749	-99.547	85.812	37.334	108.779	-211.7	279.157	13.975	118.256	-99.241	111.071	212.12	-26.319	53.355	74.147			-15.524	113.227	-45.552	45.377	-63.667	54.818	46.285	152.609	-24.894	67.485			-37.504	149.053	-90.763	47.576	-35.116	38.149	21.3486	58.6631	0.316225	72.9774	-154.475	52.0315	39.8102	123.676	-34.7757
770	44.681	67.3855	17.732	62.868	-38.156	252.002	-100.273	85.624	35.781	107.83	-210.82	278.838	12.175	118.063	-98.931	113.342	211.83	-26.339	53.212	74.162			-15.758	114.601	-48.902	43.871	-65.128	54.719	46.665	152.522	-23.783	66.669			-37.504	149.053	-90.841	48.384	-33.593	38.866	21.7763	60.0827	-0.825825	74.2788	-154.12	53.5353	31.9683	124.231	-38.7478
771	46.0278	67.9565	17.732	61.256	-39.335	253.301	-100.651	85.853	36.86	108.421	-211.702	279.053	9.206	120.086	-98.933	112.066	212.796	-26.757	52.644	72.711			-15.868	115.596	-46.392	46.189	-64.944	55.173	47.313	153.352	-22.965	67.308			-37.504	149.053	-94.698	47.683	-35.23	39.253	22.7727	58.6085	-0.147875	73.7714	-154.916	52.8164	37.335	119.538	-33.2355
772	46.203	66.5802	16.12	58.032	-38.759	253.358	-100.599	86.265	36.557	107.213	-210.523	278.876	4.817	119.028	-98.29	112.433	212.991	-27.857	52.038	74.796			-14.553	118.774	-48.443	44.885	-65.898	55.487	46.661	154.031	-22.957	68.323			-39.779	149.053	-95.648	44.693	-32.666	39.504	23.8443	59.1432	-0.812175	75.2502	-156.438	51.2512	37.4397	120.136	-35.1738
773	48.4188	70.9027	17.732	59.644	-39.337	253.239	-100.309	85.242	35.4	106.979	-210.664	280.073	3.927	117.483	-97.407	112.943	213.176	-27.263	51.738	73.571			-14.547	114.842	-47.529	45.781	-65.977	55.577	47.888	153.505	-22.356	66.405			-37.504	149.053	-96.25	46.537	-33.247	39.274	24.1127	57.5302	0.416325	74.4789	-155.123	52.1021	37.0438	120.457	-36.7026
774	46.2485	68.9052	19.344	59.644	-39.149	253.001	-99.378	84.882	35.069	105.875	-209.362	280.385	3.546	119.476	-98.011	113.381	212.797	-27.258	52.866	72.608			-18.295	114.738	-48.448	41.981	-66.358	55	46.79	153.231	-23.082	65.769			-37.504	149.053	-98.719	44.772	-35.936	41.04	26.1238	59.4776	-0.534625	74.943	-157.33	50.1637	41.0774	122.229	-37.4738
775	45.4886	65.9454	17.732	59.644	-38.221	253.017	-97.77	86.311	36.013	106.527	-208.745	280.732	0.865	118.591	-99.087	111.58	213.215	-27.353	55.653	73.018			-13.398	115.611	-49.398	45.199	-66.64	54.766	46.81	152.858	-23.412	65.652			-37.504	149.053	-97.686	45.859	-32.723	40.284	24.5382	59.1591	0.507325	75.4458	-158.49	51.1875	41.5392	123.489	-40.0172
776	45.0222	66.5915	17.732	58.032	-38.343	252.735	-98.998	86.589	35.728	105.333	-207.526	280.868	-0.769	118.455	-100.48	112.979	213.774	-27.104	55.511	72.038			-14.469	112.122	-48.908	45.554	-66.01	54.349	47.141	152.998	-22.731	65.602			-37.504	149.053	-100.466	39.338	-37.104	40.819	25.8849	59.7119	-1.63117	71.7603	-156.436	54.1746	37.8537	122.29	-36.8869
777	47.5179	69.8971	16.12	58.032	-38.508	251.63	-99.032	86.24	34.569	106.873	-206.492	280.702	4.244	120.07	-99.61	111.345	214.53	-26.61	55.281	72.271			-16.221	111.562	-46.493	42.167	-65.497	55.261	47.352	153.079	-22.017	65.506			-37.504	149.053	-100.933	37.221	-37.835	40.423	27.5935	61.5888	-0.047775	74.6428	-155.944	55.9764	37.7331	120.85	-37.8401
778	47.816	67.8382	17.732	56.42	-39.054	251.52	-98.075	87.199	33.83	106.796	-207.016	281.362	2.764	120.176	-98.989	113.249	215.227	-27.092	56.523	72.851			-14.289	113.733	-49.485	43.567	-65.549	55.49	48.644	152.985	-22.077	64.991			-37.504	149.053	-101.515	34.804	-38.583	40.939	25.2775	63.5589	3.276	73.6895	-156.472	55.5214	40.4359	127.02	-36.5615
779	48.2573	72.4019	17.732	58.032	-38.673	251.847	-97.9	87.474	31.925	108.27	-206.618	282.267	2.977	121.596	-99.366	112.159	215.409	-27.627	55.289	73.412			-14.317	115.217	-49.473	44.139	-65.632	55.754	47.487	152.637	-21.86	65.75			-37.504	149.053	-100.59	35.618	-35.432	39.722	26.638	64.5668	-2.12485	75.2866	-158.488	52.7027	39.2983	129.93	-37.2668
780	48.23	71.1392	17.732	56.42	-39.698	251.692	-98.556	87.064	30.544	107.319	-206.895	282.626	6.181	122.422	-98.407	113.215	215.461	-27.412	55.16	73.676			-11.571	117.959	-43.282	47.154	-65.741	56.683	48.677	153.268	-22.912	66.924			-37.504	149.053	-99.531	34.817	-43.45	43.087	29.0427	63.4133	-0.307125	75.323	-157.799	52.7686	38.2951	125.05	-39.0572
781	48.4234	71.0573	17.732	56.42	-41.162	252.199	-99.632	87.465	32.101	107.461	-208.287	283.397	8.409	122.393	-100.578	113.716	214.908	-27.65	55.331	74.252			-13.725	115.558	-49.947	47.455	-65.777	56.765	48.702	152.808	-23.112	65.661			-38.522	145.581	-100.353	32.726	-33.85	38.795	26.3695	66.3413	-0.4459	75.4913	-157.673	53.4284	42.9861	123.162	-38.1153
782	48.6645	67.6471	17.732	58.032	-40.717	252.438	-98.701	86.702	30.894	107.897	-207.895	283.281	9.626	121.688	-100.126	113.061	214.964	-27.439	56.248	75.125			-13.81	111.69	-47.032	44.456	-65.582	57.767	49.115	152.743	-22.873	66.205			-39.779	149.053	-102.048	33.709	-38.616	42.244	29.3179	64.2278	-0.94185	75.6142	-158.285	53.2236	43.6345	120.468	-36.0747
783	45.4386	65.4495	17.732	58.032	-40.667	252.771	-99.434	85.583	29.241	109.102	-207.153	282.093	10.987	121.366	-100.271	111.676	214.337	-26.833	57.118	72.946			-10.929	116.414	-47.544	46.45	-64.29	56.387	48.646	153.607	-22.273	66.524			-42.076	143.311	-100.977	34.475	-39.502	41.546	28.3374	65.0172	-0.193375	75.9145	-158.479	53.2782	38.5112	128.592	-37.3555
784	47.4679	68.5912	17.732	58.032	-41.195	252.743	-99.652	84.816	29.935	108.057	-208.816	282.253	8.061	121.353	-98.131	113.422	214.398	-26.427	56.384	73.357			-10.445	115.577	-47.722	47.019	-64.293	54.998	48.112	152.859	-21.795	66.21			-41.794	136.366	-104.946	32.777	-39.227	39.362	27.6663	66.0705	1.97015	77.9984	-158.718	52.6526	41.9647	116.985	-41.4687
785	47.6476	67.6494	16.12	54.808	-42.214	253.052	-99.798	85.852	31.456	108.016	-208.367	281.104	8.024	121.688	-100.069	112.756	214.559	-26.605	55.283	72.534			-12.007	116.133	-46.077	44.512	-64.032	55.458	47.391	153.228	-21.364	67.52			-42.864	137.782	-103.967	33.738	-40.977	39.678	29.2747	67.7267	-1.20347	76.0464	-159.737	49.8043	35.4741	124.01	-36.0883
786	46.5943	70.8276	14.508	56.42	-43.795	252.962	-99.657	85.535	29.864	109.341	-208.975	281.021	8.991	122.269	-99.636	112.651	213.476	-26.247	54.914	73.073			-10.264	116.085	-50.016	47.914	-63.288	53.75	48.078	152.606	-20.157	66.644			-43.248	136.173	-104.467	33.095	-41.775	40.541	28.7401	66.4027	-0.35945	75.6733	-159.773	50.2275	41.819	127.848	-34.8894
787	48.3915	69.0462	14.508	53.196	-44.847	253.741	-99.609	84.554	30.26	108.6	-209.362	281.807	6.458	121.548	-99.066	113.172	212.802	-26.061	53.926	72.93			-9.206	115.813	-46.34	43.139	-63.163	54.136	47.2	152.056	-19.558	66.551			-43.81	135.936	-101.372	34.998	-36.909	40.168	27.2318	68.3728	-0.511875	76.3012	-158.479	51.3968	37.1963	123.842	-36.9005
788	45.632	65.0377	12.896	56.42	-45.679	253.229	-100.148	85.367	29.706	106.537	-210.342	281.944	6.88	123.461	-100.002	112.482	212.975	-25.919	55.461	72.054			-9.182	115.331	-47.41	44.173	-62.542	54.304	46.722	153.077	-19.159	66.728			-45.421	136.995	-103.136	38.883	-33.494	39.512	26.7131	66.0887	-3.42842	73.6804	-159.093	49.2924	36.5638	125.655	-36.6002
789	47.527	66.2639	9.672	56.42	-45.398	253.11	-100.698	86.664	31.503	105.83	-209.357	283.02	9.209	122.681	-98.906	113.853	212.708	-25.371	55.038	71.912			-10.785	116.001	-42.988	45.817	-62.668	54.535	48.055	153.714	-19.098	66.187			-46.366	136.408			-39.767	40.227	30.1961	67.3559	-2.66857	76.4309	-158.099	51.986	32.0798	124.015	-42.6107
790	46.9014	66.6347	12.896	56.42	-45.627	253.201	-99.529	86.944	30.451	104.987	-208.138	283.683	12.523	121.815	-100.246	114.071	212.207	-25.869	55.805	71.458			-11.608	113.727	-42.703	45.23	-62.364	55.5	46.463	154.477	-19.082	67.284			-48.445	141.282			-40.248	39.204	26.7949	68.4001	-1.26263	74.8339	-162.235	45.1951	34.3434	122.04	-39.7215
791	48.7169	71.501	11.284	56.42	-45.823	252.917	-98.84	86.859	28.429	104.84	-207.533	284.323	8.303	121.822	-100.104	113.748	211.916	-26.081	53.656	73.627			-8.601	115.912	-41.545	44.109	-62.835	55.452	47.824	152.226	-18.081	66.204			-48.716	140.267			-34.946	36.8	28.1372	68.1817	-2.61625	75.1114	-162.417	46.2439	34.009	124.411	-44.5718
792	46.7535	67.4378	11.284	56.42	-45.731	252.576	-99.455	86.715	31.088	103.492	-204.666	285.287	9.864	122.038	-97.704	111.959	211.041	-25.767	53.223	73.23			-6.231	117.806	-49.649	46.903	-62.564	56.27	47.597	152.887	-17.453	66.108			-50.019	141.33			-36.649	39.22	27.259	68.5366	-0.812175	76.1715	-162.74	45.7047	31.6999	127.088	-39.7329
793	45.6638	64.3097	9.672	58.032	-46.792	253.193	-99.655	86.461	30.333	103.796	-204.038	285.452	9.586	122.663	-99.929	113.155	211.687	-25.661	51.712	75.141			-3.313	116.72	-46.772	45.827	-62.404	56.099	45.956	153.362	-18.29	65.283			-50.894	145.09			-40.042	39.163	26.5083	67.9338	0.138775	76.8131	-163.641	43.8006	33.4652	117.279	-41.4323
794	48.8625	68.7232	12.896	54.808	-46.892	252.731	-99.099	87.237	28.698	104.753	-203.143	288.221	13.384	121.096	-98.554	113.629	212.105	-25.007	52.652	74.655			-5.968	118.358	-46.526	47.547	-62.482	56.632	47.001	153.317	-18.48	66.224			-50.637	146.736			-36.678	37.662	26.779	66.4778	-0.16835	72.5611	-166.63	42.1444	32.7486	121.478	-43.2364
795	47.5475	66.9146	9.672	56.42	-47.214	253.016	-100.875	85.782	27.633	106.022	-201.922	287.713	11.016	123.4	-98.769	113.558	212.411	-25.944	52.814	74.622			-5.83	116.684	-46.529	48.267	-62.634	56.353	46.368	152.964	-19.813	66.672			-51.153	149.053			-40.175	41.15	27.1339	67.5993	-0.60515	75.2502	-167.804	42.6904	31.6817	122.898	-46.294
796	47.3519	69.8084	9.672	54.808	-47.577	252.548	-100.721	85.68	27.897	106.071	-200.726	287.633	5.769	125.074	-100.529	113.934	211.831	-26.405	51.909	73.926			-3.869	115.013	-44.564	47.697	-62.853	55.537	45.233	153.555	-20.197	66.673			-51.153	149.053			-40.765	39.842	28.8174	67.0078	0.266175	75.4049	-167.374	43.1022	31.3586	124.336	-42.4993
797	44.7424	67.0124	9.672	54.808	-48.057	252.703	-101.781	86.514	27.327	105.834	-200.995	288.854	7.162	126.211	-100.115	111.739	211.516	-26.437	53.849	74.58			-2.809	115.214	-46.483	48.795	-62.805	55.197	46.536	153.81	-20.395	66.965			-51.153	149.053			-42.999	41.155	28.0462	66.3731	2.26818	74.5313	-169.16	41.9715	31.2403	120.095	-43.7027
798	45.2202	65.4176	8.06	53.196	-47.828	252.14	-100.587	85.767	27.97	105.518	-201.15	290.407	8.375	124.315	-99.762	112.148	211.518	-26.903	53.033	75.318			-0.312	115.411	-44.855	46.521	-63.545	55.24	47.585	151.697	-21.336	67.163			-53.428	149.053			-43.848	41.931	29.0063	66.7576	1.20575	73.5052	-168.8	40.4586	29.1496	117.247	-44.731
799	50.6301	68.7823	8.06	51.584	-48.527	252.84	-100.549	85.148	26.869	106.236	-199.265	292.012	11.749	121.971	-100.858	112.44	211.778	-26.953	53.321	75.632			-1.742	115.279	-44.475	47.129	-63.64	55.497	45.4	152.003	-21.506	67.616			-51.153	149.053			-37.354	38.933	28.1008	66.5392	3.31695	74.3243	-168.116	42.7609	31.9979	117.947	-44.8767
800	46.6648	67.563	8.06	51.584	-48.583	252.428	-99.263	87.012	27.056	104.926	-198.77	291.428	12.117	122.886	-101.107	113.353	211.575	-26.574	56.242	74.098			-0.66	110.573	-43.906	47.368	-62.93	56.671	47.308	152.325	-21.569	67.094			-51.153	149.053			-45.773	42.861	29.8981	66.3003	1.07153	75.2206	-170.147	39.1391	30.9787	121.253	-41.8509
801	50.9941	69.4512	8.06	51.584	-48.738	252.958	-99.877	86.25	27.475	105.648	-198.732	293.573	12.114	121.882	-99.778	112.34	211.719	-26.507	55.522	74.873			1.871	112.267	-35.547	46.188	-62.139	56.031	47.881	150.98	-21.533	65.927			-51.153	149.053			-47.638	41.034	31.1789	68.2727	1.16025	76.0419	-169.385	40.2857	32.7281	109.575	-43.0407
802	45.0996	64.8011	9.672	53.196	-48.147	252.884	-100.1	85.823	28.572	104.583	-198.39	293.511	12.403	122.565	-101.061	111.467	212.317	-27.39	56.889	73.505			0.544	108.934	-42.4	49.392	-62.076	54.133	47.782	150.891	-20.997	66.092			-51.153	149.053			-44.721	42.113	29.5159	67.9156	-1.93375	77.1225	-168.4	40.4973	33.3811	111.939	-42.9133
803	45.1133	68.4297	8.06	51.584	-48.28	253.537	-100.69	86.676	28.254	105.303	-198.808	294.956	13.423	122.877	-100.006	111.934	211.851	-27.475	57.435	73.324			3.53	108.581	-48.734	45.151	-61.465	54.758	47.247	150.431	-21.157	65.619			-51.153	149.053			-49.603	41.706	32.0206	68.25	-1.03285	77.1566	-167.904	41.5301	32.6872	112.524	-45.7616
804	47.386	67.0306	9.672	53.196	-48.388	252.995	-100.433	84.038	28.436	106.053	-194.909	293.288	15.313	121.539	-100.602	112.036	212.848	-27.303	57.557	72.824			3.593	105.113	-39.769	44.244	-60.548	55.679	47.668	149.756	-21.236	65.888			-51.153	149.053			-46.526	41.396	33.099	69.3056	-0.5824	77.7595	-168.78	41.9237	32.6827	110.881	-44.9676
805	47.9252	64.8261	9.672	51.584	-48.666	253.148	-100.47	84.853	27.869	107.827	-190.008	291.578	15.636	119.75	-99.987	111.944	213.751	-28.28	56.802	73.224			5.985	106.217	-35.78	46.076	-60.379	56.476	45.158	150.306	-20.31	65.563			-51.153	149.053			-46.076	42.205	33.8088	67.9178	2.37055	73.7623	-167.929	43.4275	33.1058	105.116	-45.4226
806	46.9082	67.3878	9.672	51.584	-48.685	252.557	-99.998	85.18	27.905	108.726	-187.467	289.997	14.518	119.716	-101.58	110.988	213.812	-27.931	56.258	73.468			6.748	105.349	-46.973	45.868	-60.362	56.709	45.949	152.007	-19.884	64.757			-51.153	149.053			-47.173	41.99	35.2602	68.1044	3.08262	75.8917	-167.051	44.9654	32.0684	112.517	-43.928
807	49.5563	72.3109	9.672	51.584	-48.164	251.36	-100.736	85.314	29.369	108.416	-183.97	290.554	16.424	119.863	-100.812	113.338	214.412	-28.208	56.553	73.651			6.097	105.558	-43.278	44.26	-59.976	56.464	46.736	151.282	-20.241	64.768			-51.153	149.053			-45.671	41.707	35.6106	67.3969	2.7755	77.7345	-166.532	45.814	32.0206	104.334	-46.9583
808	46.9879	68.6663	9.672	51.584	-47.478	250.403	-100.691	85.068	30.31	107.333	-182.838	290.876	15.248	120.311	-100.805	112.294	214.704	-28.028	58.65	72.283			8.738	105.952	-45.568	42.896	-60.684	55.937	46.271	151.206	-20.227	64.913			-51.153	149.053			-50.667	41.949	36.9915	68.4843	4.08818	77.4364	-168.482	45.6593	32.1458	108.916	-45.2975
809	45.6297	68.2386	9.672	51.584	-47.475	249.581	-99.401	84.958	30.464	106.411	-180.826	292.073			-100.356	112.275	214.681	-27.158	57.856	74.127			9.981	106.471	-40.089	41.214	-60.658	56.337	46.583	150.687	-19.514	64.83			-51.153	149.053			-49.565	39.825	37.7559	67.315	1.547	77.6412	-168.618	45.1406	32.8806	108.834	-44.0258
810	50.7371	73.867	9.672	51.584	-46.843	248.914	-98.791	84.837	29.895	106.296	-179.309	292.05			-98.921	113.44	214.94	-27.098	57.514	74.126			12.525	104.238	-40.809	42.327	-60.464	56.6	48.24	151.472	-19.147	65.646			-51.153	149.053			-47.865	43.228	38.9025	67.1853	2.27955	78.2054	-168.193	46.2098	33.1559	111.498	-44.7993
811	44.3238	64.4007	9.672	51.584	-43.848	247.644	-99.084	83.009	30.496	104.59	-176.938	292.016			-98.015	111.868	215.164	-27.095	58.957	72.022			10.374	103.464	-47.832	46.535	-60.836	55.702	48.463	151.888	-19.866	65.396			-51.954	147.481			-40.105	39.195	38.9753	65.6588	5.82628	80.055	-169.233	44.3034	32.9966	106.67	-44.6446
812	45.9982	67.6767	8.06	49.972	-41.974	247.675	-99.061	83.819	30.641	104.673	-174.276	290.868			-98.992	111.439	215.149	-26.743	57.021	72.11			12.966	103.027	-41.555	45.769	-61.069	55.768	47.327	151.203	-19.845	65.894			-53.428	149.053			-51.061	42.104	39.3439	66.662	3.44663	78.2919	-168.136	46.1074	33.463	103.651	-44.2851
813	45.8458	65.7179	8.06	53.196	-41.236	247.128	-98.187	84.586	31.226	103.371	-172.383	291.575			-97.332	112.186	215.09	-26.999	58.794	72.207			15.098	101.134	-43.513	44.756	-62.198	55.596	48.746	150.806	-20.388	66.141			-53.428	149.053			-48.735	41.583	41.6348	65.1469	2.63445	78.3624	-168.043	45.0177	35.0873	103.842	-42.9497
814	49.7361	73.9193	8.06	51.584	-40.935	246.375	-98.412	83.995	31.739	102.089	-169.375	291.858			-98.22	110.983	215.636	-27.787	59.249	73.143			15.736	99.805	-38.8	43.113	-63.4	55.776	47.276	151.697	-19.663	66.831			-53.428	149.053			-45.83	40.441	40.7703	65.7179	2.08845	78.5603	-168.464	44.1987	36.0997	101.934	-42.795
815	47.2722	68.6595	8.06	51.584	-41.018	246.681	-97.524	84.323	31.209	102.834	-168.624	292.793			-98.992	111.045	215.384	-28.017	59.363	73.337			18.357	97.987	-40.923	42.451	-63.505	56.51	47.801	150.981	-20.575	67.055			-54.355	143.573			-45.177	40.897	40.5087	66.298	3.06215	80.312	-168.575	44.5877	36.7731	107.43	-44.0053
816	49.1491	73.5826	8.06	53.196	-41.358	246.706	-97.894	85.139	30.158	102.581	-166.209	293.399			-100.224	112.601	215.964	-27.937	58.306	76.033			18.127	101.191	-40.235	43.597	-63.2	57.672	48.542	150.764	-20.859	67.77			-55.417	144.347			-47.189	39.448	41.0183	62.674	2.27273	77.1634	-167.467	43.316	37.153	101.476	-43.589
817	47.3041	70.6979	6.448	51.584	-40.685	246.33	-97.772	84.386	31.144	100.686	-165.589	293.942			-97.449	112.376	215.333	-27.511	57.982	76.026			18.452	97.86	-40.96	43.517	-63.243	57.828	48.755	151.46	-21.014	67.675			-56.418	140.577			-48.902	39.385	42.0488	60.8062	0.302575	77.5616	-168.123	43.9757	37.7286	100.78	-45.3931
818	50.2912	72.7932	8.06	53.196	-38.821	245.973	-97.447	83.817	32.041	99.221	-164.207	294.424			-99.374	112.314	214.623	-27.874	60.884	74.595			16.517	95.622	-40.504	41.225	-63.817	58.28	49.4	151.616	-21.542	68.96			-57.781	141.109			-49.89	42.54	41.7986	61.855	0.62335	77.8778	-168.457	42.5493	35.5742	98.2345	-46.071
819	46.9947	69.2624	8.06	51.584	-39.073	245.984	-97.799	83.851	31.879	97.876	-162.54	294.977			-99.139	111.701	214.638	-27.746	59.593	77.374			21.12	96.079	-39.292	45.078	-64.138	56.952	47.451	151.424	-21.113	67.615			-56.928	137.027			-43.015	40.225	43.2159	62.8924	1.66303	76.0282	-166.38	45.5159	36.2521	100.971	-43.5094
820	46.2894	68.3728	9.672	51.584	-38.379	245.566	-98.211	84.689	30.956	96.759	-158.814	297.142			-98.168	111.833	214.83	-28.318	59.433	75.915			21.774	97.306	-40.015	44.106	-64.551	57.75	46.872	152.53	-20.913	68.622			-57.327	138.33			-52.99	43.332	41.8736	61.2726	-0.53235	77.9915	-167.577	43.5708	37.2076	99.5153	-45.9277
821	46.4464	69.7629	8.06	49.972	-38.318	244.462	-97.958	85.647	30.293	95.579	-156.043	297.346			-100.092	110.558	214.536	-27.606	60.785	75.499			21.888	92.002	-40.818	42.039	-64.55	57.381	46.668	152.168	-20.744	67.987			-56.981	137.899			-44.05	41.958	41.5438	58.4334	-0.27755	77.4751	-166.544	42.7745	36.1156	91.5346	-47.7363
822	45.7798	70.0973	9.672	49.972	-37.828	242.523	-98.413	84.37	29.826	95.022	-153.258	296.22			-100.61	112.108	214.448	-27.527	61.549	75.791			24.429	94.99	-43.559	42.761	-64.768	56.391	46.539	151.975	-20.438	66.824			-56.483	136.967			-43.347	39.9	42.5289	60.6947	-0.05915	76.4605	-167.071	43.2136	38.1836	98.2504	-45.5956
823	46.0141	71.5965	9.672	49.972	-37.959	241.847	-98.483	84.786	29.224	95.478	-151.946	297.294			-99.558	112.282	213.72	-28.067	60.505	76.606			28.372	90.497	-38.339	44.823	-65.588	55.851	47.739	150.67	-21.514	66.678			-56.889	138.001			-41.806	40.169	44.7856	61.2248	1.3377	77.1908	-165.754	45.3976	37.649	97.4951	-42.9338
824	49.5768	68.9666	8.06	49.972	-36.08	241.397	-97.385	83.4	30.235	96.037	-148.567	297.091			-99.33	112.499	213.701	-27.964	60.32	74.239			26.455	89.369	-38.255	46.556	-65.846	55.551	46.904	150.736	-21.527	66.626			-57.072	137.568			-43.815	41.953	45.2338	59.9826	-0.830375	77.9597	-164.385	46.7262	38.5817	98.8692	-46.0915
825	46.435	68.821	8.06	48.36	-37.745	241.433	-98.903	83.749	28.363	97.621	-146.129	297.728			-100.703	113.928	214.077	-28.387	60.669	74.429			27.697	89.473	-42.283	45.61	-66.436	55.452	47.833	151.404	-21.672	66.906			-56.85	138.516			-45.518	41.824	44.5695	61.1202	0.220675	77.7163	-163.259	46.542	38.4475	92.4742	-47.2859
826	50.0432	70.7935	8.06	49.972	-37.139	241.278	-97.49	84.597	29.387	97.677	-144.642	297.437			-101.06	112.864	215.435	-27.724	61.064	75.573			25.066	89.825	-38.22	44.674	-66.626	55.195	47.794	150.258	-19.83	66.311			-56.924	138.02			-45.707	38.846	43.7983	61.425	-0.111475	76.9951	-159.844	50.5824	37.699	97.2722	-48.6509
827	46.1507	67.0966	8.06	51.584	-37.119	241.399	-99.062	82.958	28.287	97.241	-143.326	298.047			-99.687	113.075	214.963	-28.178	59.863	76.065			24.612	91.548	-36.594	43.523	-66.044	54.712	47.74	149.827	-20.39	66.076			-57.104	139.284			-42.425	38.299	41.8577	60.0987	2.0566	77.5843	-159.887	50.3867	39.8535	95.3316	-45.6092
828	45.8344	65.4859	9.672	51.584	-35.8	242.546	-99.041	83.248	28.344	97.302	-143.136	297.58			-98.715	112.214	216.027	-28.141	60.178	76.841			25.973	87.554	-42.486	44.608	-65.893	53.92	47.482	149.221	-19.581	65.302			-57.149	136.542			-42.938	37.418	42.8087	64.7169	-0.4095	77.7163	-157.218	52.6685	38.5044	94.847	-45.6752
829	46.7672	70.4727	9.672	49.972	-36.127	244.111	-98.794	83.416	27.473	97.764	-142.454	296.558			-100.228	115.081	216.244	-28.182	61.227	77.662			26.467	88.625	-40.341	43.136	-66.179	54.651	47.238	149.888	-18.477	65.676			-56.803	136.139			-41.308	37.361	45.2293	65.5314	-0.35945	79.0653	-156.554	54.1882	39.6396	90.5837	-47.5589
830	47.7136	70.1018	9.672	51.584	-35.749	245.561	-100.295	83.761	26.631	97.912	-142.748	296.487			-101.275	112.625	216.631	-28.086	59.871	77.055			26.91	85.283	-40.279	41.917	-65.96	55.343	46.134	150.384	-17.926	65.042			-57.069	136.944			-42.182	38.231	44.3739	63.9616	-1.82	77.0474	-156.809	54.1814	38.7228	91.8759	-51.3718
831	46.6694	69.7674	9.672	51.584	-34.417	245.347	-99.435	82.51	25.87	98.496	-141.807	296.677			-100.061	111.906	216.526	-28.136	60.264	76.168			27.505	88.521	-35.733	46.038	-65.716	54.045	45.316	150.01	-17.716	64.338			-57.331	138.029			-42.131	37.93	47.1971	63.3678	-0.65975	79.9344	-155.321	55.9809	39.2096	97.9638	-48.4507
832	50.3003	72.5998	11.284	53.196	-34.133	246.247	-100.611	83.632	25.664	98.951	-142.041	297.26			-99.064	113.299	216.287	-27.817	60.234	76.065			28.266	85.556	-41.945	44.077	-65.708	53.568	46.353	149.56	-17.06	64.423			-57.251	137.064			-43.528	39.32	47.6044	63.518	4.06087	79.4475	-154.008	57.7213	34.5391	78.2259	-52.7709
833	45.6183	66.4095	9.672	51.584	-32.848	246.156	-100.642	82.884	25.86	99.639	-143.414	297.358			-100.452	112.113	215.561	-28.271	60.131	75.136			29.415	83.774	-37.272	44.942	-65.582	53.231	46.168	149.959	-17.843	63.188			-58.861	137.934			-43.507	36.684	49.8066	64.5486	0.652925	78.8629	-155.198	57.2322	36.8368	91.5733	-49.5381
834	46.6216	69.0394	9.672	53.196	-31.062	246.316	-100.139	83.676	26.991	100.773	-143.134	298.783			-98.199	112.708	216.195	-27.972	61.47	75.879			29.955	82.939	-41.884	45.822	-66.012	53.715	45.425	150.738	-16.925	63.243			-58.139	138.767			-46.061	40.019	45.8185	63.6568	1.24443	78.5057	-152.896	58.5676	36.5388	86.318	-50.4868
835	44.7993	64.8625	11.284	56.42	-30.258	246.073	-100.324	84.6	26.396	100.831	-141.765	299.136			-97.677	111.528	216.252	-27.941	61.125	74.623			31.622	82.059	-36.812	46.007	-66.923	53.799	46.55	150.238	-17.594	63.445			-58.216	141.553			-44.711	40.993	48.8079	64.6145	2.50478	77.4069	-154.033	60.2989	38.2359	94.1099	-49.3971
836	44.3739	65.2038	11.284	54.808	-29.603	246.585	-100.671	85.768	25.403	101.46	-141.084	300.479			-98.58	112.598	216.012	-27.396	59.903	74.846			31.448	81.583	-37.92	45.03	-67.061	54.626	46.824	150.563	-18.564	63.041			-59.192	143.575			-45.871	41.151	48.3915	66.43	1.33998	80.5122	-154.004	59.7961	38.3315	84.175	-46.3008
837	48.3915	70.8207	11.284	54.808	-27.489	248.408	-100.203	85.111	26.049	100.967	-140.104	300.554			-97.274	113.538	215.994	-28.562	60.122	75.024			29.976	83.749	-39.474	45.397	-65.999	55.264	47.447	150.344	-19.094	62.83			-59.93	144.706			-47.291	42.157	50.298	66.6916	1.03513	78.6877	-152.325	61.698	38.6159	97.188	-48.2459
838	44.2556	68.2773	12.896	53.196	-25.939	249.521	-99.295	84.801	26.775	101.605	-139.801	302.671			-99.058	112.86	216.304	-27.419	60.706	74.025			29.537	86.844	-41.703	44.115	-65.597	56.364	48.091	150.119	-17.762	62.806			-59.37	143.78			-47.408	43.081	47.1266	64.8056	0.3185	78.9243	-153.724	62.2372			-47.9661
839	44.3693	63.5066	11.284	54.808	-25.186	249.763	-100.023	84.907	26.208	102.012	-139.116	303.322			-98.936	112.378	215.814	-28.61	59.867	72.655			27.964	87.729	-40.434	46.003	-64.192	57.745	46.801	150.768	-19.727	62.405			-59.89	140.099			-50.403	44.916	48.8966	63.9593	0.757575	79.6295	-151.306	61.1406			-47.8091
840	43.5503	65.8021	12.896	54.808	-24.236	250.027	-99.029	85.079	25.922	101.985	-138.196	303.877			-99.045	112.326	216.066	-27.984	59.492	73.384			27.355	87.633	-40.591	44.156	-63.112	59.728	46.784	150.215	-19.093	62.183			-58.912	138.326			-50.951	44.579	47.9434	62.8901	-1.39912	77.4023	-151.711	62.5147			-47.6021
841	45.7321	68.887	14.508	56.42	-24.834	249.624	-99.355	84.747	25.739	102.146	-137.735	303.502			-98.426	111.129	215.685	-28.027	60.908	71.732			27.194	88.391	-40.107	42.224	-62.789	60.496	47.759	150.224	-19.824	61.343			-59.216	139.154			-47.871	44.782	50.96	63.8683	-0.40495	77.5229	-151.915	64.4894			-45.5887
842	39.4849	53.6195	12.896	54.808	-24.472	249.025	-100.677	84.196	25.081	101.449	-136.949	303.958			-100.218	112.532	215.958	-27.525	59.643	76.036			27.233	88.763	-41.072	43.129	-62.451	60.973	48.08	148.184	-20.104	61.041			-59.523	139.773			-43.148	46.961	52.9916	64.5713	0.648375	77.9756	-151.294	65.9545			-43.5458
843	45.3817	68.0271	14.508	56.42	-23.916	249.719	-99.812	84.1	25.04	102.031	-134.82	305.446			-99.218	112.864	216.119	-27.94	59.231	75.115			27.932	87.073	-39.346	45.711	-62.998	60.609	47.801	147.936	-19.324	61.016			-60.975	140.44			-35.985	51.251	55.1187	66.7326	1.18983	77.9301	-151.485	66.1775			-44.7356
844	42.6085	67.5038	16.12	56.42	-25.086	249.524	-101.305	83.419	23.687	101.673	-135.598	305.147			-99.846	113.427	216.249	-27.797	58.829	73.815			27.935	89.102	-46.777	46.553	-62.226	61.476	47.608	149.149	-19.57	60.299			-60.253	149.053			-30.635	55.178	54.5318	66.1479	-1.63117	79.2951	-150.848	66.0069			-44.5058
845	43.7301	66.5301	16.12	56.42	-25.943	249.654	-101.801	83.341	23.239	101.45	-132.511	306.374			-99.577	112.122	215.967	-26.983	60.247	76.486			27.785	90.615	-41.68	48.31	-61.482	61.818	47.632	148.336	-18.15	60.63			-60.253	149.053			-27.38	58.037	53.5421	65.5018	1.38775	76.2261	-151.927	66.8441			-41.5938
846	46.4464	70.3589	17.732	56.42	-25.255	249.361	-101.414	82.55	23.46	101.622	-132.568	304.286			-99.57	111.66	216.094	-27.724	59.694	74.655			27.522	90.335	-42.916	44.67	-61.029	62.755	45.883	147.999	-17.927	60.708			-62.528	149.053			-22.526	61.888	52.5593	66.0796	-0.0728	78.1235	-152.111	66.3208			-42.6517
847	44.8311	68.8483	16.12	56.42	-24.365	249.736	-100.935	83.703	23.26	101.916	-133.3	306.258			-98.024	111.923	215.619	-28.031	60.692	77.165			27.165	90.168	-37.009	47.581	-60.801	64.424	45.913	147.325	-17.684	60.647			-62.528	149.053			-21.236	65.464	56.9205	67.7518	-0.880425	76.2398	-152.691	67.0943			-42.8428
848	45.798	68.2591	16.12	56.42	-24.659	248.605	-100.772	82.376	22.787	100.756	-131.663	307.42			-98.903	110.794	216.057	-27.092	59.994	77.857			27.604	87.204	-40.802	42.844	-60.287	64.936	44.873	146.818	-17.321	60.813			-64.803	149.053			-20.679	68.785	58.0512	67.0647	1.64482	77.4683	-152.282	68.4684			-41.9601
849	47.1903	68.7892	16.12	56.42	-23.175	248.781	-99.794	82.514	23.71	100.903	-129.879	308.606			-97.856	111.983	216.054	-26.841	58.656	76.479			26.371	88.268	-41.484	45.722	-59.421	63.845	45.225	147.421	-17.593	60.514			-64.803	149.053			-17.888	71.667	57.1889	66.0614	4.03585	78.1576	-150.889	68.4525			-42.3741
850	46.0824	71.3212	17.732	56.42	-21.993	248.48	-99.16	82.557	23.821	101.617	-126.743	309.689			-97.691	110.773	216.149	-27.879	61.529	75.549			26.901	88.215	-39.948	43.121	-59.378	65.623	45.548	146.623	-16.778	60.586			-64.803	149.053			-17.295	72.484	58.7564	66.7189	-1.0283	77.2522	-149.945	70.9754			-42.6471
851	47.3268	71.7831	17.732	58.032	-20.955	247.785	-99.349	82.419	24.257	101.553	-125.081	310.873			-98.842	114.188	216.462	-27.57	60.872	76.951			30.428	87.34	-37.138	43.171	-59.256	67.024	46.494	147.772	-16.773	60.747			-67.078	149.053			-17.355	73.992	58.1194	67.0351	-0.020475	77.1589	-147.943	70.02			-42.6881
852	45.9436	72.1926	17.732	56.42	-20.298	247.331	-99.924	82.643	23.936	101.919	-126.087	312.134			-99.315	111.893	216.505	-28.256	62.48	77.032			30.07	88.122	-35.259	43.193	-59.722	66.885	43.732	148.387	-16.324	60.091			-67.078	149.053			-17.411	74.171	59.5936	65.6633	1.4287	79.4316	-147.245	71.6693			-41.8668
853	48.7828	70.1087	19.344	58.032	-19.566	247.201	-99.978	82.33	23.487	101.455	-124.766	309.866			-100.451	111.785	216.578	-27.287	62.421	76.868			29.865	87.461	-36.846	42.778	-60.056	67.142	44.562	147.658	-16.502	59.978			-67.078	149.053			-15.295	75.833	61.7913	68.4479	-1.19437	79.7934	-148.635	71.8036			-39.6373
854	47.618	70.8025	19.344	54.808	-19.806	248.632	-99.974	81.326	22.324	101.51	-124.704	311.369			-98.541	113.699	216.364	-27.313	61.031	78.274			28.007	92.226	-36.649	46.948	-60.086	68.271	44.247	148.187	-16.18	59.842			-64.803	149.053			-16.907	73.797	62.4487	67.6972	0.793975	77.1179	-146.701	72.1448			-45.0359
855	47.3223	68.6732	19.344	56.42	-18.628	249.853	-100.66	82.382	22.456	101.54	-124.315	309.974			-99.872	111.972	216.38	-27.149	60.75	77.571			28.606	89.593	-36.079	44.156	-59.605	68.522	44.139	147.46	-16.691	58.079			-67.078	149.053			-14.059	76.832	60.7994	66.5756	1.1375	79.0449	-145.268	71.749			-43.5799
856	46.9105	67.6221	20.956	56.42	-18.177	250.787	-102.104	81.685	21.776	101.214	-122.936	309.97			-101.191	112.468	216.718	-27.93	60.47	78.945			30.54	88.371	-37.969	42.309	-60.561	70.089	44.328	148.046	-16.224	59.457			-64.803	149.053			-14.45	77.023	62.5966	69.5968	-1.31267	80.0572	-145.746	71.9423			-44.6878
857	45.4909	67.6494	19.344	56.42	-17.994	250.953	-101.104	81.873	22.428	101.103	-121.245	311.178			-100.918	112.513	216.396	-28.366	61.721	77.933			30.769	86.538	-33.617	40.929	-60.962	71.065	44.527	147.121	-15.924	59			-64.803	149.053			-14.868	77.175	61.9505	67.0511	-0.637	78.3487	-146.114	72.0652			-44.813
858	47.2995	68.8438	20.956	58.032	-17.384	250.898	-100.633	82.528	23.824	100.227	-119.057	310.25			-99.897	112.626	216.164	-27.712	60.358	76.467			34.92	82.374	-31.23	42.353	-61.608	71.797	44.471	145.909	-16.463	58.074			-64.803	149.053			-15.062	77.336	62.0939	68.3683	0.443625	81.1174	-145.486	73.8852			-44.9586
859	48.4802	71.8309	19.344	54.808	-18.1	251.15	-101.163	83.395	23.978	99.616	-118.323	310.286			-99.996	112.777	216.125	-28.084	60.129	76.487			31.546	86.647	-38.341	46.397	-61.816	72.779	45.281	145.161	-15.95	57.705			-64.803	149.053			-14.905	76.83	64.1937	69.408	-1.48785	81.4268	-144.374	73.3528			-45.3589
860	45.8868	62.8082	20.956	58.032	-17.676	250.966	-100.104	83.425	23.981	99.204	-116.457	310.02			-99.221	113.149	216.079	-27.619	59.77	77.057			31.601	87.656	-31.878	37.36	-62.054	74.275	45.211	146.381	-15.887	58.166			-64.803	149.053			-15.912	77.352	63.1358	71.4941	2.28183	79.2109	-143.791	74.6655			-45.7957
861	47.0652	68.9666	20.956	56.42	-18.116	249.995	-99.861	82.889	23.548	98.565	-115.17	311.997			-99.257	112.471	216.213	-27.487	58.938	75.719			29.822	88.402	-33.527	42.129	-62.492	74.329	44.645	144.474	-16.135	58.415			-62.528	149.053			-15.81	78.116	66.2389	71.1279	1.33998	78.5057	-142.952	76.9633			-45.1337
862	46.9606	69.3488	20.956	54.808	-18.033	249.972	-100.059	83.748	23.911	98.748	-116.07	313.607			-99.801	113.298	216.093	-27.426	59.656	75.853			29.444	87.382	-35.751	44.445	-62.596	74.504	44.595	143.566	-16.8	57.02			-62.528	149.053			-15.052	78.337	62.5033	68.73	0.0364	78.1372	-143.76	77.5639			-45.566
863	46.8059	67.8769	20.956	54.808	-18.664	249.16	-101.652	82.888	23.562	98.595	-114.058	313.155			-99.934	112.761	215.875	-27.393	59.174	75.445			30.416	88.38	-30.088	38.474	-63.031	75.321	43.861	144.295	-16.865	57.026			-62.528	149.053			-16.618	78.214	76.076	72.2472	-1.547	80.5782	-143.553	78.6013			-46.8855
864	47.8615	68.6413	19.344	56.42	-19.205	248.628	-101.765	82.418	23.253	98.488	-112.958	312.872			-99.289	111.753	216.028	-27.432	57.701	76.18			29.376	90.86	-32.67	40.141	-63.549	76.14	42.978	145.119	-16.88	56.56			-62.528	149.053			-16.122	78.199	67.3355	72.0652	-1.15797	78.2054	-143.448	80.0777			-45.0495
865	43.3115	64.3529	20.956	56.42	-19.852	248.672	-101.091	81.695	22.48	97.956	-111.596	313.748			-99.243	112.929	215.325	-27.494	58.635	74.252			29.477	90.273	-31.34	40.35	-63.54	77.088	43.517	143.826	-16.499	56.267			-64.803	149.053			-16.276	78.006	64.1482	72.2654	0.357175	80.0572	-143.553	80.0322			-46.7604
866	44.7538	63.7341	20.956	54.808	-19.907	248.552	-102.017	82.411	22.212	97.926	-110.967	312.677			-100.157	112.116	215.153	-26.965	59.431	76.776			28.455	93.642	-31.15	40.709	-64.208	78.234	42.798	145.126	-15.936	56.021			-64.803	149.053			-17.186	78.706	65.4791	69.8789	-0.73255	81.3768	-143.116	80.9604			-45.5182
867	46.4464	65.4677	20.956	56.42	-20.726	248.736	-101.705	82.751	22.269	98.469	-110.601	314.555			-101.007	114.28	215.573	-27.15	58.894	74.299			27.316	95.105	-32.612	39.561	-63.931	79.305	41.506	144.316	-14.882	56.71			-64.803	149.053			-17.419	79.103	65.8521	72.188	0.0637	79.0767	-143.027	80.03			-45.682
868	46.4828	64.7215	20.956	56.42	-21.585	248.534	-101.604	82.633	21.777	98.427	-108.466	314.701			-100.135	112.749	214.768	-26.879	58.484	75.572			28.486	97.256	-33.886	40.108	-63.212	79.381	40.707	144.092	-15.016	56.781			-64.803	149.053			-18.097	76.893	61.723	73.71	-0.2002	78.5284	-142.929	78.6035			-45.1929
869	49.0285	69.185	20.956	56.42	-21.337	247.942	-101.637	82.464	22.981	97.09	-107.045	315.856			-99.323	112.437	215.135	-26.605	55.72	76.314			28.881	97.755	-30.728	41.918	-62.594	79.543	40.392	143.026	-13.229	57.302			-64.803	149.053			-19.547	76.53	88.4725	71.0414	1.43325	78.0712	-143.555	79.3247			-45.0928
870	45.1087	65.0741	22.568	56.42	-21.929	248.955	-102.021	82.655	24.187	96.531	-105.854	317.836			-100.059	112.599	214.973	-26.507	56.615	76.577			28.513	94.907	-33.386	38.718	-62.408	78.019	38.556	142.682	-12.867	57.206			-64.803	149.053			-20.234	76.266	63.559	76.4263	-1.00782	80.5395	-141.905	79.9412			-45.8913
871	45.1997	65.4108	22.568	54.808	-21.381	248.933	-101.203	82.611	24.051	96.56	-105.145	316.731			-98.2	112.67	215.189	-26.875	57.021	75.923			28.135	99.033	-31.695	39.133	-62.309	76.807	38.435	143.381	-13.136	56.893			-64.803	149.053			-21.877	74.139	62.7104	72.1038	-0.8372	80.9673	-141.466	78.8606			-44.4307
872	44.8949	64.9672	20.956	54.808	-21.098	248.73	-101.156	81.635	23.843	94.813	-103.771	317.477			-98.281	113.143	215.132	-26.428	57.47	76.284			33.204	90.687	-29.14	40.367	-61.465	76.202	39.147	143.378	-13.33	57.63			-64.803	149.053			-21.392	72.57	63.3997	74.6791	-1.62663	80.6578	-141.507	77.6867			-45.0109
873	46.2121	63.3406	20.956	58.032	-20.618	248.829	-99.577	82.573	24.033	94.532	-103.266	317.157			-98.641	113.654	215.219	-26.117	57.083	77.512			28.845	95.102	-30.537	35.88	-61.656	75.901	37.16	144.204	-13.169	57.948			-62.528	149.053			-22.405	73.367	61.8209	74.8065	2.03385	80.8808	-142.147	77.598			-46.5306
874	49.0445	67.0192	20.956	56.42	-20.702	248.733	-100.647	82.987	24.013	93.375	-102.004	319.148			-98.477	113.696	214.896	-26.8	56.407	78.524			33.715	93.08	-28.675	41.309	-60.924	75.105	37.417	143.838	-12.021	57.76			-62.528	149.053			-25.225	69.953	59.3639	73.6508	0.602875	80.7375	-140.827	76.8404			-45.9186
875	47.5134	65.5905	19.344	58.032	-20.585	248.497	-100.152	82.905	24.2	92.626	-99.995	318.977			-97.571	111.759	214.721	-27.053	57.952	77.95			29.965	96.229	-34.425	35.901	-60.771	75.498	36.141	144.445	-12.764	58.403			-62.528	149.053			-25.426	71.591	61.0997	72.9934	1.72673	80.0982	-138.352	78.4921			-46.9332
876	45.889	64.3484	22.568	56.42	-20.104	248.937	-101.848	83.512	24.058	91.941	-97.453	313.765			-98.319	112.578	215.458	-27.372	55.525	78.003			29.553	93.133	-33.158	32.66	-60.497	76.042	37.157	145	-13.025	59.532			-62.528	149.053			-26.256	70.579	57.6963	72.4383	-0.04095	84.6072	-139.994	77.5206			-44.1305
877	48.9307	68.4934	19.344	56.42	-19.694	248.04	-101.152	82.339	23.611	90.803	-98.178	313.924			-97.76	112.255	215.073	-26.617	56.758	77.456					-28.321	39.487	-60.479	75.662	38.461	144.197	-12.134	58.897			-62.528	149.053			-25.655	68.934	60.7266	77.8482	-0.84175	82.6462	-138.081	75.348			-45.2293
878	46.6011	63.2791	20.956	54.808	-19.931	248.87	-100.796	82.605	23.528	90.545	-97.147	312.53			-100.127	112.441	214.953	-26.464	56.163	79.036					-34.129	38.802	-60.056	75.925	40.408	146.129	-12.451	60.032			-62.528	149.053			-25.082	69.899	82.5575	69.2624	-0.3367	85.3512	-137.531	75.207			-45.0268
879	50.5209	69.2192	22.568	56.42	-19.339	248.797	-101.212	82.173	24.229	90.314	-97.277	314.264			-98.997	114.092	214.571	-26.856	55.987	77.807					-32.97	41.146	-60.662	76.017	40.893	144.321	-11.88	60.809			-62.528	149.053			-25.051	70.486			1.39003	82.6462	-136.905	75.1069			-45.3635
880	46.0551	63.8251	20.956	54.808	-20.02	248.944	-102.138	82.062	23.8	90.96	-96.895	313.814			-98.232	113.608	213.714	-26.537	58.79	76.201					-26.954	41.61	-60.312	75.705	41.881	145.591	-11.01	60.622			-62.528	149.053			-24.653	68.834			0.82355	81.0696	-135.638	76.8973			-44.9267
881	47.2495	67.4924	20.956	56.42	-19.369	248.82	-101.876	82.46	24.273	92.043	-97.391	315.705			-97.44	113.626	214.58	-26.533	55.383	78.043					-30.085	39.516	-60.157	76.915	42.385	145.653	-11.603	61.207			-62.528	149.053			-24.228	70.24			0.37765	82.1889	-135.219	74.9999			-46.3736
882	48.2641	64.4417	22.568	54.808	-19.416	248.408	-102.578	82.744	23.63	91.63	-94.656	316.83			-98.567	112.61	213.639	-26.904	54.872	80.239					-29.139	42.595	-59.697	76.858	41.149	145.758	-11.086	60.837			-62.528	149.053			-25.296	68.118			1.47648	81.354	-136.118	75.4345			-44.6719
883	46.1461	62.2326	20.956	54.808	-19.448	248.387	-102.251	82.493	22.488	90.626	-93.141	320.906			-98.422	113.126	214.105	-27.593	57.045	78.273					-29.48	42.327	-59.182	76.976	42.032	146.441	-12.332	61.407			-60.253	149.053			-25.463	68.829			-0.097825	82.4346	-134.951	74.0285			-43.7778
884	46.8445	68.4798	20.956	56.42	-19.55	248.112	-102.449	82.028	21.871	89.756	-91.574	324.887			-97.684	113.259	214.075	-27.075	55.059	79.067					-29.356	40.812	-59.45	77.445	42.706	146.02	-12.575	61.991			-57.978	149.053			-25.549	68.983			1.55383	82.8055	-136.088	73.71			-43.9575
885	45.9755	63.2063	20.956	56.42	-20.296	248.797	-102.65	82.259	21.792	90.19	-89.585	326.24			-98.323	111.996	214.023	-27.189	54.735	79.702					-29.907	35.384	-58.636	78.015	41.758	145.478	-12.994	61.284			-57.978	149.053			-25.696	69.329			0.75985	82.835	-135.701	73.412			-46.5397
886	45.0564	65.5905	20.956	58.032	-21.165	248.923	-103.305	82.082	21.27	89.329	-88.456	328.474			-98.933	112.802	214.283	-27.26	53.621	78.345					-27.708	47.377	-58.265	77.274	41.983	144.62	-13.086	61.26			-57.978	149.053			-26.366	67.797			3.64455	85.4649	-135.752	73.3437			-46.3053
887	45.0314	65.2516	19.344	56.42	-20.686	249.175	-102.422	82.501	22.29	89.752	-87.367	328.513			-97.386	113.318	214.234	-26.959	55.485	77.908					-29.337	41.186	-57.778	76.558	43.177	144.034	-13.91	60.978			-57.978	149.053			-26.454	68.758			1.78588	81.7476	-136.006	72.4337			-43.2659
888	44.3625	63.6932	20.956	54.808	-20.526	248.993	-101.534	83.039	22.31	90.434	-87.191	329.478			-98.418	111.937	214.02	-26.975	52.518	78.721					-30.898	40.645	-57.267	74.871	41.366	143.958	-13.433	61.071			-57.978	149.053			-27.933	69.459			1.37183	84.6368	-135.274	72.3769			-46.3349
889	44.6628	65.6383	20.956	54.808	-21.943	248.896	-102.794	82.721	21.388	88.771	-86.237	330.953			-98.565	113.031	214.739	-27.258	56.732	77.27					-28.157	41.833	-56.57	75.168	41.702	143.704	-13.483	61.227			-57.978	149.053			-27.906	70.289			3.9312	84.7096	-133.126	70.9368			-47.7727
890	49.2788	67.3901	20.956	56.42	-20.569	248.917	-101.488	82.982	22.963	87.097	-83.422	331.169			-98.853	114.36	215.041	-26.965	55.159	77.825					-26.274	42.384	-56.326	74.743	42.323	142.512	-12.679	61.532			-57.978	149.053			-27.475	69.472			2.0202	82.1685	-134.534	72.1289			-45.161
891	46.0915	64.2961	20.956	56.42	-20.733	248.627	-101.567	82.903	23.919	83.983	-82.65	333.042			-99.108	113.391	215.189	-27.269	56.849	76.283					-28.782	41.256	-56.108	74.795	41.826	142.68	-12.452	62.056			-55.703	149.053			-27.013	69.962			2.66403	82.1616	-134.362	73.1458			-46.9537
892	44.0053	64.9877	19.344	56.42	-20.249	248.57	-102.159	80.755	23.404	84.453	-80.2	332.815			-98.433	113.224	214.895	-26.682	52.981	74.408					-25.127	42.178	-55.609	76.208	42.09	143.013	-11.363	62.391			-57.978	149.053			-27.196	68.164			2.00428	83.2309	-133.781	71.4623			-46.021
893	48.0116	67.4333	19.344	58.032	-20.328	248.759	-101.243	81.835	23.192	83.188	-78.049	334.291			-98.848	113.738	214.23	-27.01	55.346	76.903					-28.85	30.923	-55.531	76.359	42.2	142.616	-12.828	61.099			-55.703	149.053			-26.519	69.696			2.34325	80.9673	-132.821	71.2007			-44.6901
894	45.7434	63.9616	19.344	58.032	-19.804	248.674	-102.326	81.861	23.386	81.517	-76.672	334.859			-99.154	114.334	214.138	-26.78	56.414	76.069					-27.744	35.439	-54.281	76.406	42.286	142.013	-12.109	60.633			-57.978	149.053			-26.082	69.668			0.5005	82.9329	-133.763	70.7252			-42.8496
895	48.8397	68.0998	19.344	56.42	-19.686	248.919	-102.702	81.428	22.778	80.081	-75.316	334.112			-100.107	113.849	214.225	-26.361							-29.51	36.767	-53.803	78.448	41.994	142.547	-13.633	61.518			-55.703	149.053			-24.65	70.655			0.74165	81.5041	-132.815	70.4067			-45.0268
896	46.6466	64.8876	19.344	54.808	-19.357	248.915	-102.898	80.688	22.602	79.589	-75.568	335.172			-100.243	113.722	214.035	-26.538							-28.084	39.999	-52.657	79.102	40.349	142.981	-12.992	62.246			-55.703	149.053			-24.588	70.688			-0.361725	83.9566	-133.458	71.5988			-43.8961
897	49.115	65.6702	19.344	54.808	-18.148	248.921	-102.244	80.649	22.492	78.81	-74.582	334.347			-98.698	112.083	213.275	-26.162							-25.711	36.531	-52.335	79.593	40.582	143.876	-13.699	61.714			-53.428	149.053			-23.491	70.434			1.6744	83.5699	-131.766	70.3225			-42.6244
898			20.956	58.032	-18.193	249.015	-102.429	81.647	22.802	78.499	-72.817	333.813			-98.876	113.967	213.396	-26.099									-52.143	79.46	40.304	143.58	-13.679	61.066			-52.168	137.19			-23.406	70.807			-0.13195	84.5026					-43.6277
899
[truncated: 3 more columns]

## Sheet: Supplement 1C NoEGFMCF7
	X_Cell 0	Y_Cell 0	X_Cell 1	Y_Cell 1	X_Cell 2	Y_Cell 2	X_Cell 3	Y_Cell 3	X_Cell 4	Y_Cell 4	X_Cell 5	Y_Cell 5	X_Cell 6	Y_Cell 6	X_Cell 7	Y_Cell 7	X_Cell 8	Y_Cell 8	X_Cell 9	Y_Cell 9	X_Cell 10	Y_Cell 10	X_Cell 11	Y_Cell 11	X_Cell 12	Y_Cell 12	X_Cell 13	Y_Cell 13	X_Cell 14	Y_Cell 14	X_Cell 15	Y_Cell 15	X_Cell 16	Y_Cell 16	X_Cell 17	Y_Cell 17	X_Cell 18	Y_Cell 18	X_Cell 19	Y_Cell 19	X_Cell 20	Y_Cell 20	X_Cell 21	Y_Cell 21	X_Cell 22	Y_Cell 22	X_Cell 23	Y_Cell 23	X_Cell 24
0	0	0	0	0	0	0	0	0	0	0	0	0	0	0	0	0	0	0	0	0	0	0	0	0	0	0	0	0	0	0	0	0	0	0	0	0	0	0	0	0	0	0	0	0	0	0	0	0	0
1	-1.01234	1.45564	-0.55614	1.96019	0.06448	0.37076	-1.38954	1.12679	5.16485	-1.39277	-0.58032	1.29282	-0.91078	0.404612	-2.47926	1.17676	-1.05747	1.37987	-1.1413	1.48465	-1.62973	2.71622	-1.08165	1.13968	-2.18748	-0.307892	0.114452	4.2847	-0.82212	1.37342	-0.899496	0.132184	-1.15258	0.786656	-0.485212	0.54002	-2.25196	0.643188	0.087048	0.61256	0.24986	0.341744	0.117676	2.73718	0.806	1.64424	-1.09616	1.11873	-0.980096
2	-0.095108	1.36536	0.220844	3.06764	0.738296	0.00806	-1.50722	1.53462	2.52278	2.75974	-0.164424	0.768924	0.1209	-0.12896	-2.32612	1.90377	-1.11873	1.81511	-0.589992	1.31056	-1.34602	1.80383	-1.07843	2.50666	-4.11382	-1.75063	0.415896	3.94134	0.058032	0.783432	-0.083824	0.662532	-0.328848	0.98332	-0.030628	2.02628	-2.12623	2.02145	0.206336	1.32668	0.609336	0.03224	2.62917	8.0326	1.48465	2.16169	-0.256308	1.06714	-0.696384
3	-0.099944	1.60072	1.26058	2.50988	0.730236	0.609336	-0.47554	1.68132	0.296608	4.17024	0.472316	0.222456	0.984932	-1.3573	-0.889824	1.40083	-0.462644	2.55824	-0.639964	1.3573	-0.946244	2.16814	-0.18538	2.03918	-4.04128	-1.34602	0.259532	3.24818	0.922064	1.46531	1.35247	0.536796	0.098332	0.896272	0.35464	2.01822	-2.0827	2.04885	0.728624	1.11712	1.18321	0.286936	3.10149	11.0132	1.23802	2.11656	0.62062	0.498108	-1.0478
4	-0.739908	2.02467	1.50883	2.70655	0.401388	0.012896	-0.754416	1.53624	1.31862	4.17024	0.351416	0.502944	0.728624	-1.67326	-1.99082	-0.017732	-2.06981	3.22078	-1.317	1.21222	-1.00589	2.24229	0.688324	2.17459	-5.89347	-1.00266	0.520676	2.1085	0.90272	1.0607	2.5792	0.12896	-0.224068	-0.4433	0.736684	2.30677	-2.2568	1.80222	1.08004	1.69582	-1.45402	0.304668	4.28631	14.1985	1.70711	2.28904	-0.025792	-0.114452	-0.99138
5	-0.776984	1.36053	2.04079	3.19337	-1.82801	-1.18804	-0.94302	1.69421	1.14613	2.63401	0.190216	-0.117676	-0.514228	-1.209	-1.79577	-0.178932	-1.74902	3.73984	-1.2622	1.0075	-0.957528	2.52117	0.8463	1.57331	-6.51732	-1.69744	-0.235352	1.60716	1.05586	0.294996	2.45991	-1.13001	0.066092	-0.462644	0.119288	1.8409	-2.33901	1.74418	1.0881	0.116064	-2.9951	0.543244	5.06652	16.6729	1.59588	1.20578	1.13807	-1.57654	-1.66681
6	-0.551304	1.66842	2.00533	3.75596	-1.16225	-1.24608	-0.897884	1.31378	-5.18258	0.783432	-0.403	0.883376	-0.609336	-2.29549	-1.60555	0.111228	-2.30194	3.82689	-1.22834	0.888212	-1.5314	3.00477	0.718952	1.87798	-5.89831	-0.989768	0.132184	0.69316	1.23318	0.0403	2.74201	-2.14718	0.880152	-1.01556	-0.125736	1.31862	-2.49538	1.03007	1.77481	-0.602888	-1.99566	0.480376	4.10093	18.2317	2.27776	1.28315	0.680264	-2.44379	-1.8812
7	0.291772	1.41211	2.33418	4.2589	0.963976	-0.678652	-0.317564	1.65714	-3.74629	0.527124	0.391716	1.34763	-0.559364	-2.51633	-2.17298	1.13324	-1.14291	3.88331	-1.04619	1.22673	-1.0075	3.8156	1.40405	2.72106	-7.15728	-1.59749	0.315952	0.857584	2.26002	0.554528	3.67375	-2.45185	1.56525	0.436852	0.738296	1.78448	-1.9215	1.72806	2.34546	-0.0806	-2.17942	1.38471	4.66835	18.7605	1.30411	2.25841	0.141856	-2.40349	-1.54591
8	-0.29822	1.95858	1.61039	4.77958	1.40728	-1.46047	-1.46853	2.17136	-0.75764	2.68076	-1.63779	2.09076	-1.63457	-2.30838	-2.55502	2.69204	-1.72645	4.9972	-1.96825	1.52495	-0.78182	3.08053	1.18966	1.78771	-6.52376	-1.40728	-0.893048	0.490048	1.5717	0.520676	3.12406	-2.97414	1.47659	0.446524	-0.320788	1.63779	-2.20683	1.87153	1.68776	0.312728	-2.08915	0.702832	4.1106	17.9802	0.683488	4.41043	-0.13702	-2.42284	-2.02467
9	0.66898	1.88282	1.70872	4.24278	3.52061	-2.72428	-0.578708	2.02951	0.657696	1.77965	-2.21972	0.744744	-1.25575	-3.70599	-2.9016	2.73395	-1.35408	6.32065	-1.21384	1.4782	-0.54808	2.79682	0.259532	1.55397	-9.66394	-1.76514	-1.17515	-0.004836	1.63457	0.053196	3.03217	-1.53785	1.41211	0.670592	-0.868868	1.83284	-1.97792	1.60555	1.56686	0.847912	-1.101	0.058032	5.66779	18.7121	-0.203112	5.36474	0.006448	-1.59749	-2.18587
10	-0.211172	0.746356	1.57654	3.30782	2.76942	-3.07086	-1.71517	2.12462	-1.907	0.164424	-1.59588	1.78126	-1.3702	-2.68237	-3.29009	3.29976	-2.13429	6.11593	-1.95213	1.68293	-1.20255	3.17242	0.696384	1.81834	-10.7327	-2.10205	-1.77642	0.831792	1.68293	0.069316	0.864032	-0.843076	1.28154	0.053196	-0.804388	2.35352	-2.35836	0.917228	1.39116	0.83018	0.304668	1.44113	9.161	20.5272	-0.891436	5.79192	0.905944	-1.5314	-2.06175
11	0.25792	0.752804	1.8006	2.66464	3.83978	-4.34918	-1.1558	2.53084	1.03652	0.686712	-2.85163	1.98921	-1.39438	-3.39004	-3.34168	3.8559	-1.64263	7.8182	-2.27776	2.13268	-1.23157	3.17242	0.899496	3.01928	-7.50225	0.393328	-2.58404	1.612	1.75386	-0.140244	0.50778	0.286936	1.63457	0.343356	-1.33957	2.92256	-1.99404	1.45241	1.56848	0.944632	1.59749	2.52923	10.0186	21.6733	-1.17354	7.47001	1.70872	-2.14235	-1.93279
12	0.157976	0.826956	0.980096	2.821	5.08908	-4.60548	-1.53946	2.2439	-0.638352	0.1612	-1.05102	2.54212	-2.15524	-3.8156	-4.27664	4.04934	-1.38471	7.86172	-1.53624	2.65496	-2.33579	3.98648	0.488436	3.26752	-8.41142	-0.3627	-3.16113	2.35191	1.3299	-0.417508	-0.151528	0.598052	2.25841	-0.444912	-0.380432	2.89354	-1.79577	1.81028	1.40244	1.20739	2.31322	2.61628	9.04816	21.8587	-1.8006	8.0326	1.20739	-1.14452	-1.5443
13	0.6045	1.31217	0.407836	2.4857	2.54857	-6.61726	-1.26058	3.01283	0.904332	0.980096	-1.5314	2.19071	-2.12623	-3.35296	-4.72155	4.01066	-0.968812	8.23087	-2.23423	2.26808	-1.03652	4.56196	0.415896	3.12244	-8.81119	-0.2418	-4.08803	1.74902	0.857584	-0.796328	0.412672	0.71734	1.81672	-0.706056	-0.664144	2.70332	-1.86831	1.09132	2.33095	0.963976	1.68132	1.38954	8.5033	22.2956	-3.90588	7.61509	0.8463	-0.188604	-0.849524
14	0.315952	0.606112	-0.81406	2.16492	2.39221	-7.42326	-1.94246	2.40994	0.098332	0.806	-1.86025	1.94891	-1.36375	-4.63289	-6.29647	4.43139	-2.27937	8.55811	-2.62111	1.43468	-1.11389	5.02299	0.264368	3.48031	-11.1389	-2.37448	-4.70382	1.96664	0.43524	-0.820508	0.216008	0.001612	0.87854	-1.24769	0.087048	2.70816	-2.66786	0.825344	2.91127	-1.18321	-1.09777	0.804388	7.96973	20.3305	-4.02033	7.37974	2.46958	0.320788	-0.425568
15	0.707668	0.348192	-0.409448	2.46475	3.64312	-6.9316	-0.393328	2.97736	1.78448	1.4508	-1.43468	1.74257	-1.89249	-4.02355	-6.82521	4.68608	-1.62167	8.06322	-2.11817	2.48087	-1.56364	6.1385	0.4433	3.9768	-11.3195	-0.222456	-4.30565	1.21061	1.08326	-0.022568	0.117676	0.236964	1.90055	-0.498108	1.03652	2.2439	-2.50827	0.696384	3.3852	-2.18748	-3.01928	0.57226	7.48613	20.2612	-4.33467	6.98641	3.01444	0.764088	0.341744
16	1.0752	1.05264	-1.34924	1.66036	3.94779	-5.81448	-0.691548	2.16008	0.776984	0.615784	-2.53729	2.16814	-2.0424	-4.92788	-6.19653	5.77741	-2.91611	8.33888	-1.8409	1.75224	-1.47014	4.95045	1.17837	3.21272	-12.7106	1.317	-4.34112	-0.061256	0.486824	-0.230516	0.46748	0.656084	2.4712	-0.175708	1.4637	1.54591	-3.53512	0.294996	2.10366	-1.20739	-2.78876	0.768924	6.88485	18.6138	-5.33088	7.86011	3.15307	0.901108	1.17354
17	0.464256	0.382044	-2.12139	1.45564	2.50988	-6.64305	-0.336908	1.60555	-3.88814	-3.83817	-2.10044	0.609336	-0.841464	-6.80586	-6.11915	5.91282	-3.88331	8.89663	-2.09721	1.3428	-1.57331	5.22449	1.15097	3.34168	-14.8578	-2.91127	-4.61999	-0.415896	0.833404	0.125736	0.912392	0.7657	2.05208	-0.623844	1.74902	0.093496	-3.48192	0.7657	2.98542	-1.13646	-2.49215	1.16709	6.24489	18.9346	-6.37062	9.20613	3.22078	1.0075	0.95914
18	0.747968	-0.211172	-1.88604	2.04079	2.68076	-6.81715	-0.767312	2.22456	-3.35457	-7.39747	-2.52117	1.69099	0.944632	-7.02832	-6.75267	5.8838	-4.0977	8.21475	-1.88604	1.52656	-0.95914	5.4002	-0.12896	2.94512	-17.5805	-3.30621	-3.36908	1.36053	0.857584	-0.31434	1.63618	0.718952	1.47982	-0.536796	3.09182	0.649636	-3.6673	1.10583	2.53245	-0.796328	-3.25463	-0.496496	7.52965	21.0447	-5.19225	9.0143	4.84406	0.14508	0.519064
19	1.40405	-0.90272	-1.85541	2.46475	4.10093	-5.40504	-1.04296	1.77965	-2.52923	-12.0481	-2.26002	1.61039	0.245024	-6.93482	-8.36306	5.95795	-5.07296	8.69029	-2.70494	1.50238	-0.8463	4.58936	-0.799552	2.49215	-17.9706	-3.71244	-2.80004	2.46958	-0.452972	-1.21384	1.05908	1.30572	1.1155	-1.09294	2.64046	-0.625456	-3.53834	0.992992	2.15686	-0.291772	-3.14018	-0.116064	6.96868	21.6895	-3.57864	10.5393	4.41366	-0.544856	0.224068
20	0.839852	-1.44435	-1.73451	2.41961	3.13534	-5.83544	-0.615784	1.58298	-0.098332	-12.1126	-2.19232	1.70388	0.817284	-7.64733	-7.85689	6.2594	-5.14389	7.10408	-2.87581	1.35247	-1.36375	3.4787	-1.73612	2.98059	-18.5896	-3.00316	-2.92094	1.93762	-1.0752	-1.22673	0.393328	1.60394	0.570648	-1.67003	3.332	0.344968	-3.53834	0.884988	2.54696	-1.65875	-3.07892	-0.697996	7.37812	23.2805	-1.92795	10.0782	2.53245	-0.888212	0.320788
21	1.13162	-0.87854	-1.78771	3.64151	2.48893	-4.78119	-0.791492	1.27993	-3.14179	-11.903	-2.96124	1.72162	1.17192	-6.9993	-7.21209	5.44211	-4.94239	7.2411	-2.39382	1.74096	-0.855972	3.89298	-3.31588	1.28154	-20.2387	-2.56792	-2.42445	2.21972	-0.83018	-1.81834	0.001612	2.15041	-1.06714	-1.91828	2.34868	-0.196664	-3.93489	1.36698	2.41155	-0.433628	-3.67375	-0.043524	7.77145	24.4718	-1.13646	11.3662	2.80972	-1.65714	0.569036
22	1.05425	-0.601276	-1.13001	4.38625	3.08053	-4.5265	-0.704444	1.39438	-8.76122	-9.94443	-2.64046	2.30838	2.11978	-8.33404	-6.40448	5.03428	-6.20136	7.66828	-2.85163	1.60394	0.643188	2.91288	-2.92417	-0.261144	-20.2499	-2.71622	-1.71678	2.46475	-0.972036	-1.5846	0.12896	2.57436	-1.76836	-1.44758	2.05046	-0.183768	-3.63184	1.20255	2.63562	0.353028	-4.28308	-0.420732	7.89396	25.9016	-0.643188	11.9901	2.66786	-1.49755	0.623844
23	0.947856	-0.399776	-0.212784	4.3395	3.99454	-3.74145	-0.037076	1.89732	-10.7488	-9.16744	-2.44057	1.52656	2.01984	-9.80096	-5.58397	5.23578	-6.04661	8.83215	-2.51956	1.27993	-0.33046	3.6399	-3.29976	-1.03813	-20.7674	-0.82212	0.34658	2.31644	-0.888212	-1.57976	1.23318	1.43468	2.07142	-1.7732	2.30194	-0.320788	-3.59154	0.478764	3.50932	0.925288	-3.21916	1.23318	9.34638	27.3411	0.74152	12.6284	2.59371	-1.209	1.54752
24	1.83284	-0.486824	0.166036	3.47064	4.01066	-4.13478	-0.180544	2.70977	-10.1733	-7.0928	-2.38092	2.90805	1.69099	-9.39312	-4.66352	5.43566	-5.86446	9.04977	-2.55986	0.6045	-0.559364	3.13695	-2.97575	-1.08004	-21.4009	-1.06231	0.980096	2.56308	-0.98332	-1.33151	0.454584	1.25252	2.72589	-0.746356	2.70332	-0.623844	-3.32394	0.167648	3.04023	1.81834	-2.20199	1.71839	9.23192	26.9607	1.93762	11.8192	2.84196	-1.57331	1.7732
25	0.889824	-2.821	-0.167648	2.81616	5.54689	-6.55117	-1.14613	1.24608	-10.8874	-15.6477	-2.52278	3.08698	2.78715	-12.917	-5.4679	5.78547	-6.13688	6.88646	-3.03701	-0.598052	-0.003224	1.71839	-4.58453	-1.55397	-23.4353	-9.00141	3.59315	0.91078	-4.88758	-12.3608	-0.143468	-0.383656	3.9494	-5.52916	-2.2294	-2.50505	-4.27502	-4.49587	2.40027	2.10366	-3.46096	-0.211172	9.99118	28.5856	0.025792	10.4441	3.03862	-2.19071	0.731848
26	1.99727	-0.490048	0.992992	4.89887	4.14768	-6.86712	0.99944	2.92256	-7.28785	-8.55972	-1.17676	1.56848	4.57002	-12.6752	-2.96769	5.4679	-5.23255	8.80636	-1.33957	0.05642	0.888212	4.72477	-1.72162	-1.79899	-19.9711	-1.52173	1.05586	2.4986	-0.947856	-0.859196	1.31862	0.196664	4.42655	-2.14074	3.49804	-0.831792	-2.2294	-0.130572	3.29493	2.34224	-2.51956	0.917228	10.9245	27.7699	3.51416	10.9729	7.03477	-1.62167	1.45725
27	22.6373	-7.96489	22.2537	-2.0021	24.7523	-13.7794	21.6314	-3.42872	13.8213	-16.2296	20.3789	-5.65812	23.1806	-19.4778	17.7094	-0.0806	15.3043	2.44379	19.884	-7.17501	21.9925	-2.35997	19.5665	-9.77839	-3.17564	-9.28996	22.4922	-5.7903	20.1935	-7.78274	21.2365	-6.76073	25.3664	-9.35927	23.0645	-9.64782	18.7524	-7.49419	24.338	-3.67536	17.2065	-6.4754	31.7048	21.5138	25.1343	4.36368	28.5018	-9.15294	22.1747
28	18.9797	-8.30341	17.3725	-3.2514	19.2731	-15.1415	16.8857	-4.44751	8.93209	-17.4709	16.6584	-7.38296	18.3558	-18.5864	13.8293	-0.793104	10.1846	2.79843	15.04	-9.09974	17.3032	-2.74362	16.9308	-10.499	-6.57857	-10.96	18.9539	-7.34588	15.8105	-8.62259	16.3844	-7.96328	21.0833	-10.4458	19.5262	-10.2813	14.1098	-8.93854	19.6116	-4.50232	13.1056	-8.34049	26.835	20.3692	20.8012	3.29009	25.1553	-9.95894	17.8593
29	14.9819	-9.22386	13.0878	-4.47652	14.1711	-17.5901	12.5833	-6.17074	3.60604	-19.5391	12.2915	-8.84988	12.0158	-17.8416	9.63815	-2.73234	5.58074	2.19232	11.3356	-8.83215	12.1642	-4.27664	12.8493	-12.2754	-14.026	-13.6424	13.86	-8.44849	11.8015	-10.0121	12.3366	-10.3523	17.4821	-12.1948	13.1942	-12.6735	9.74776	-10.8617	15.2431	-6.10626	8.56294	-11.2566	22.1279	18.9894	16.5069	0.586768	22.2214	-11.9884	12.8831
30	12.3511	-8.40819	9.65104	-4.18314	10.6166	-17.2468	9.80418	-6.26423	-1.10261	-20.387	9.56077	-8.10675	8.72414	-17.0904	7.12826	-3.4529	2.39543	2.77748	9.0949	-7.93104	8.8789	-3.17564	10.0057	-12.0836	-18.2898	-13.0314	11.1035	-7.96973	9.22548	-9.33187	9.77194	-10.2426	14.2807	-12.1835	10.7682	-12.7203	7.18146	-10.3007	13.1459	-6.41576	6.75912	-9.18195	18.5041	19.1119	13.2893	-0.488436	20.0565	-11.795	9.27545
31	10.8343	-8.54199	7.61025	-3.79465	9.24321	-16.9615	7.89074	-6.32065	-2.69526	-20.9979	7.41359	-7.72954	7.33138	-16.033	5.11326	-3.41422	-0.220844	4.2315	7.32654	-7.8053	7.92782	-3.41583	9.20291	-12.3399	-20.4418	-11.5548	9.97022	-8.74026	7.47001	-9.42698	8.7854	-9.88156	13.0185	-11.7595	8.68062	-13.7359	5.64845	-10.4522	12.306	-6.53344	5.43566	-8.73059	16.3586	18.9458	11.8643	-1.29121	17.7626	-11.9659	7.89719
32	10.7117	-8.53554	6.20942	-3.31588	8.95466	-16.61	7.30397	-5.51949	-5.36151	-22.7437	6.62371	-7.60058	6.35934	-16.5214	3.90104	-3.95262	-2.46636	5.03911	6.64628	-7.86011	8.16317	-3.72211	8.87245	-11.4855	-22.3584	-11.9868	8.49363	-7.67796	7.19597	-8.38562	7.46195	-8.67095	11.371	-11.4645	8.73059	-13.3893	4.55874	-10.7391	12.0368	-6.35128	6.04178	-8.38724	15.6267	18.8201	11.9578	-0.103168	17.1065	-11.7934	6.81231
33	8.76606	-8.69513	4.49103	-2.75491	8.72414	-17.0888	7.02993	-5.44372	-5.9773	-24.1171	7.03154	-7.52804	6.05145	-18.3816	3.25302	-3.49965	-3.6544	6.10626	5.96118	-8.0874	7.254	-3.85429	8.41303	-11.1099	-23.0129	-10.9777	6.89936	-7.146	5.69358	-8.74349	6.55923	-9.67361	10.6795	-11.4484	7.6038	-13.2248	4.01388	-10.0976	12.2996	-7.80853	6.26584	-8.67578	14.3774	16.4763	12.0626	0.04836	16.286	-11.7934	5.56462
34	8.37273	-8.6113	1.87153	-3.34651	8.52587	-17.2645	6.61242	-6.15784	-7.27012	-25.6437	4.20087	-7.58124	5.6823	-19.3633	1.41534	-4.15412	-4.5942	6.78974	5.04072	-8.2615	7.74405	-4.2444	7.26206	-11.1663	-21.9699	-10.5344	5.79514	-5.98374	4.3653	-8.46622	5.83866	-10.7117	9.04977	-10.5747	6.1256	-13.025	3.12889	-10.312	12.2109	-8.82409	5.3873	-9.28351	11.8595	14.0083	11.5564	-0.562588	16.2038	-11.8176	4.16057
35	8.75155	-8.96756	0.37882	-2.21811	8.80474	-17.7691	6.25617	-5.78224	-7.11859	-24.1268	2.97736	-7.75211	5.46629	-20.3757	0.718952	-4.42172	-4.9972	6.21265	4.77474	-7.86656	8.22281	-3.52867	7.39424	-11.2324	-23.7045	-10.5247	4.83922	-5.77257	3.14824	-8.39691	5.1455	-10.2717	9.13037	-11.8418	6.40125	-12.8944	2.5518	-10.0202	13.2232	-9.60107	4.83116	-9.12714	10.6424	12.7767	11.047	0.280488	16.4666	-12.435	3.82689
36	7.87623	-9.95571	-0.562588	-1.54913	8.71608	-17.7384	6.97512	-5.72099	-11.1712	-23.2386	3.16919	-7.85044	5.8306	-20.6836	-0.26598	-3.53512	-6.57212	6.39319	4.22666	-7.66828	5.91765	-3.82366	7.49258	-11.2566	-22.6276	-10.6037	4.01227	-5.52594	2.17459	-8.74188	3.78175	-10.0508	8.05678	-11.0583	5.53077	-12.8073	1.20578	-9.90574	12.8154	-10.6166	3.78014	-8.40819	10.2684	11.4662	11.8804	0.159588	17.1275	-13.0894	3.03056
37	8.29696	-10.0137	-1.02523	-1.42662	8.5436	-16.6906	6.29325	-5.47274	-14.9465	-22.9226	3.91071	-9.35444	6.27713	-19.9098	-0.536796	-3.52706	-7.44422	5.6146	4.26535	-6.57696	5.15679	-3.59798	7.56189	-11.6951	-22.5567	-11.7853	3.11116	-3.66408	1.17837	-9.10135	3.29654	-10.457	7.59091	-10.3007	5.10198	-12.7348	0.361088	-9.36411	13.7923	-12.0819	4.0703	-7.81659	10.9342	12.003	12.622	-2.16653	16.7471	-13.0443	3.22239
38	7.91008	-10.1169	-0.914004	-0.730236	9.49952	-16.1168	6.2465	-5.56785	-17.7046	-22.4535	4.59742	-7.24916	7.80692	-22.3085	-0.87048	-2.81133	-4.7828	4.34112	4.34112	-6.3803	5.42277	-3.52544	7.56512	-12.169	-22.1473	-13.5166	1.97792	-2.69365	1.10422	-9.39796	2.90482	-11.2953	7.28946	-9.89929	4.10576	-14.0131	-0.541632	-9.85577	13.7133	-11.7869	3.31911	-7.72632	12.3608	13.0427	13.3103	-2.24552	17.8432	-12.8863	4.17669
39	8.27278	-10.5634	-0.420732	-1.14936	10.3281	-15.1351	5.71776	-5.56946	-18.9152	-21.7862	3.90104	-7.65216	7.59574	-22.2633	-2.28743	-3.4787	-4.91015	5.15356	4.38786	-5.84511	5.45823	-4.24762	7.49902	-13.0379	-21.5653	-14.6821	1.24124	-2.54535	0.367536	-9.45922	2.55824	-11.5774	6.42221	-9.4431	3.88008	-14.5999	-0.97526	-10.2491	14.213	-12.8412	3.04346	-7.78435	12.6816	15.9121	14.1082	-2.27292	18.3897	-12.8412	4.20893
40	8.05678	-11.1018	0.061256	-0.859196	11.5758	-15.4123	5.3599	-5.44695	-19.294	-20.7996	3.05635	-6.69786	6.07079	-22.0119	-2.24229	-2.75974	-5.05362	4.92788	4.37497	-5.8435	6.46896	-4.38464	8.84182	-12.7106	-23.1225	-15.7928	-0.377208	0.369148	-0.855972	-10.3281	2.25519	-11.2324	6.23522	-9.73487	4.20248	-14.0437	-0.859196	-10.1282	15.7863	-14.0599	3.25302	-7.81014	10.9568	18.7637	16.2232	-2.17942	18.2301	-12.622	5.1987
41	7.98262	-10.9697	0.149916	-2.50182	11.7837	-15.3027	5.3325	-5.7903	-20.8899	-19.1973	2.67592	-7.53126	5.87413	-23.1483	-3.71727	-2.71461	-4.97302	3.43356	4.11544	-6.21748	5.90153	-4.0574	10.4973	-11.658	-21.6298	-15.6332	-0.391716	0.683488	-1.13162	-10.5731	2.1359	-10.7762	4.77152	-10.37	2.81939	-14.4032	-0.222456	-10.3426	15.7912	-15.4897	2.1633	-8.0874	10.0524	21.1656	17.0856	-1.77159	19.639	-12.7058	4.71188
42	8.05678	-10.4135	-0.0403	-4.68125	11.8563	-15.5413	5.78708	-5.46307	-20.3402	-16.9679	4.07675	-7.11859	6.3803	-25.6115	-4.11221	-2.90644	-6.42543	4.95206	4.47814	-5.62749	6.55117	-4.40076	11.2373	-11.0051	-24.72	-18.1946	0.098332	2.37448	-2.18748	-11.5322	2.64529	-9.85416	5.44695	-11.0519	2.72589	-14.9352	0.415896	-9.67522	17.9528	-16.7068	2.66302	-7.56189	9.42375	23.5852	18.2414	-1.4105	19.0829	-13.7778	4.43461
43	7.23949	-10.0847	-1.04458	-4.42172	12.5575	-15.5123	5.04395	-4.95368	-18.6879	-15.0786	4.05418	-6.5963	5.31476	-26.7721	-4.03322	-2.24229	-5.75806	5.21482	4.37497	-5.74356	5.55979	-4.83922	12.3431	-9.94926	-24.0204	-18.5058	-0.614172	3.9897	-2.99026	-11.6677	2.08915	-8.96111	6.448	-10.4441	2.44863	-15.2673	0.710892	-10.1798	17.8916	-16.9873	2.45346	-7.42971	9.53014	24.2219	19.6374	-2.0553	18.3639	-13.9825	4.85696
44	6.50603	-9.80902	-2.49215	-3.90426	12.2028	-16.5343	4.89081	-4.88275	-18.164	-18.8056	4.54906	-7.56995	5.10682	-27.9892	-3.8962	-2.07464	-6.43188	5.75	4.60871	-5.30509	5.73872	-4.65707	13.2877	-9.41247	-23.5868	-19.1764	-2.5518	4.21377	-3.24173	-11.5226	1.69905	-8.91114	6.50764	-10.528	1.49755	-16.0152	1.26058	-9.81063	18.1028	-17.3725	1.65391	-7.44422	10.0557	25.7646	22.3971	-1.51689	18.2801	-12.7509	4.6345
45	7.25561	-9.83965	-3.3852	-2.49054	12.3528	-16.1555	5.30026	-4.85857	-16.5875	-14.6402	3.16919	-5.47274	4.23795	-28.3986	-3.51577	-1.94246	-7.87946	6.6221	5.06168	-5.50659	5.63233	-3.87525	15.0303	-7.765	-23.1644	-20.5208	-3.32072	5.49531	-2.71461	-13.8261	2.4712	-8.78379	5.60654	-10.7585	1.14291	-16.3215	1.75869	-10.499	18.6637	-17.7868	0.978484	-7.549	11.1292	26.7592	24.7893	-2.25841	18.8072	-11.0761	4.54745
46	7.33782	-9.65749	-3.16597	-1.93601	12.3254	-16.7471	5.50982	-5.23255	-16.7874	-14.0953	2.60177	-8.13576	2.45991	-29.2078	-3.80593	-2.87097	-8.7177	5.15034	4.41043	-6.2336	6.8381	-3.55607	15.7122	-6.85422	-23.669	-20.8432	-5.09876	5.4534	-3.00638	-14.6998	1.73612	-9.69296	5.5485	-11.0454	1.21061	-16.8567	1.49594	-11.1035	18.2704	-18.6122	0.480376	-8.82248	11.7853	27.1187	26.1934	-2.91772	19.7164	-11.147	3.56252
47	7.68763	-10.7472	-1.51044	-2.45669	10.9261	-16.681	5.29058	-5.37924	-16.0007	-15.6025	3.82366	-8.31147	4.13962	-28.7516	-4.19926	-2.70977	-10.3926	7.56995	5.03105	-6.21104	6.84778	-3.13856	17.1436	-7.64088	-23.4304	-21.043	-6.22554	5.54044	-3.53673	-15.8701	1.20094	-9.92992	6.47218	-10.4941	2.2971	-16.4553	1.76514	-10.5215	18.5299	-18.6476	-0.248248	-8.66934	12.7735	28.3986	26.4916	-2.73718	20.316	-9.75582	4.25084
48	7.96973	-9.68651	-0.143468	-1.51367	12.3528	-16.9228	4.41204	-5.52594	-16.4714	-15.1496	3.95262	-7.20403	5.10843	-30.3636	-3.71244	-1.78771	-10.91	7.14116	5.0907	-5.94989	6.85745	-4.17669	18.3397	-7.82787	-23.9769	-20.7287	-6.26907	6.47057	-3.735	-16.2941	0.689936	-9.7397	6.24972	-9.80257	1.24124	-16.9969	2.5389	-10.8439	18.7782	-19.1264	-1.75386	-8.52426	13.1249	29.1643	28.4486	-2.34546	20.8303	-9.14488	3.53834
49	8.17445	-10.1089	1.54591	-0.361088	12.1577	-16.9131	4.73767	-4.5007	-16.2264	-15.5558	3.59637	-6.18363	4.05579	-29.8204	-4.1509	-0.963976	-11.7418	8.0326	4.6474	-5.59203	6.83649	-4.17992	19.0135	-7.36523	-24.5217	-20.8561	-6.75428	5.29542	-3.18048	-14.9803	0.760864	-9.56238	6.16106	-9.09329	1.84896	-17.5079	3.93489	-9.59946	18.6105	-17.9013	-1.07037	-7.41198	13.0572	29.9655	29.6221	-1.53946	20.5885	-9.62848	3.99776
50	10.0234	-11.1341	1.79254	-0.373984	13.8761	-15.9765	4.46685	-4.28792	-16.5794	-15.3333	5.11649	-7.35394	5.0907	-32.2319	-3.58831	-1.13162	-9.41892	4.51199	5.25028	-6.15139	6.78491	-4.14123	20.0613	-6.94933	-24.6942	-20.9915	-5.88541	6.38674	-3.32878	-15.9669	0.812448	-9.51564	6.4077	-9.58656	2.25841	-17.0856	4.22666	-9.46405	19.1909	-18.2124	-0.520676	-7.78757	13.8245	31.1729	29.6979	-1.51689	21.1204	-11.4516	4.32822
51	10.8423	-10.823	1.83446	-0.030628	15.7041	-16.2119	4.69414	-4.59904	-18.8362	-13.7681	6.0321	-6.92354	7.60542	-32.9396	-3.70276	-2.32289	-9.19001	6.53182	5.86929	-5.91926	6.33355	-4.34273	20.9415	-6.67529	-23.8979	-20.3579	-6.50764	7.1863	-3.38198	-16.0604	1.22673	-9.49146	5.98052	-10.1443	2.41639	-16.7729	4.47008	-9.50596	18.9765	-18.048	1.36536	-6.62532	13.407	31.7628	28.7258	-0.963976	20.5997	-10.4941	4.49748
52	10.1459	-10.4361	0.810836	1.40728	15.8363	-16.365	4.42978	-4.20732	-19.1135	-15.3543	2.41961	-7.48129	7.3475	-31.9998	-3.82366	-1.78932	-8.07451	4.82633	5.47758	-5.98536	6.75106	-4.36046	21.841	-6.37546	-24.9312	-21.5347	-6.77201	7.57801	-4.45073	-15.5671	0.804388	-9.0143	5.1052	-10.104	2.56469	-16.797	4.08803	-9.47211	17.9142	-18.2156	0.864032	-6.17235	9.98473	32.556	26.2998	0.59644	19.9517	-9.50758	3.77208
53	11.6032	-10.6134	0.449748	1.4379	13.7407	-17.4128	4.53939	-3.84301	-19.4907	-16.1635	5.02299	-7.14277	8.03098	-33.7553	-3.69954	-1.15419	-7.49741	3.39648	5.13583	-5.77902	6.25617	-3.96713	23.3224	-5.36312	-24.4605	-21.6218	-6.99124	6.84778	-4.64256	-15.8089	-0.18538	-8.85794	4.80698	-10.0814	3.79465	-16.8647	3.69148	-9.38345	16.797	-17.8996	0.006448	-6.01437	8.55972	33.8198	27.0381	-0.196664	19.0764	-7.66506	3.53512
54	11.8272	-10.1072	0.77376	2.29226	16.5053	-17.2839	4.59098	-4.22666	-19.0732	-16.0652	3.3578	-7.5893	7.8585	-32.2771	-3.63506	-0.58838	-6.43833	0.559364	4.53456	-5.71293	6.56729	-4.60387	23.9785	-5.51465	-25.842	-22.8662	-6.17718	8.01648	-5.09553	-17.0437	-0.004836	-8.88051	5.3067	-10.0976	2.3503	-16.2006	2.93868	-8.72414	16.5166	-18.459	-1.43146	-7.95844	7.57962	33.0476	28.0827	-0.504556	16.5423	-7.78112	2.6872
55	12.2254	-10.5264	1.49755	1.70227	16.4102	-17.8545	4.27664	-3.64634	-18.8137	-18.8088	3.50932	-6.78007	8.3824	-32.3029	-4.16218	-1.12679	-6.23522	-2.65174	3.8817	-5.58719	5.96762	-5.18419	24.6813	-6.57374	-25.3277	-24.1961	-5.12616	6.5012	-5.04072	-17.1904	-1.00911	-8.77573	6.06112	-10.075	3.72533	-16.2828	2.83873	-9.43826	15.6138	-19.1054	-0.691548	-7.51514	5.68552	32.269	30.4749	-0.291772	12.5381	-7.94232	2.23907
56	12.0175	-9.27545	2.42445	1.77642	15.3527	-17.9867	4.53456	-3.99937	-16.9873	-17.7433	3.71405	-8.3824	8.09869	-33.312	-3.9623	-0.889824	-6.12238	-3.17403	4.13962	-5.31799	7.02026	-3.6544	24.2703	-4.94239	-25.7098	-24.8748	-7.02832	6.1933	-4.9843	-17.0614	-2.05691	-7.66828	6.35612	-10.2701	4.1106	-15.8379	3.20627	-8.54682	15.4639	-18.8797	-2.48732	-8.19057	4.325	32.9203	32.4044	-0.493272	11.1679	-7.85366	1.32668
57	12.6832	-9.64782	3.67697	2.45669	17.4838	-18.3945	4.91338	-4.19926	-17.6014	-16.4698	2.90482	-7.57479	8.9192	-32.8703	-3.80593	-1.15419	-6.09175	-5.12294	4.59098	-5.30509	6.97351	-3.56091	24.8925	-4.33467	-25.5357	-24.604	-8.11158	7.63604	-4.89081	-17.0953	-3.13534	-7.73599	7.11698	-10.802	3.99454	-16.3634	3.2369	-8.73865	14.7965	-18.8507	-4.29114	-8.56294	2.59371	32.8252	34.716	0.119288	10.507	-7.81175	1.24608
58	11.9868	-9.59785	4.17508	2.44057	17.8303	-18.3865	4.75862	-3.87364	-17.3177	-15.746	4.86985	-6.959	8.31308	-34.6757	-4.70865	-1.19772	-3.83495	-7.05734	4.42494	-5.3067	6.78652	-3.3175	26.3755	-3.86558	-26.216	-24.5959	-7.08474	9.14165	-5.16646	-17.4934	-3.20466	-6.42221	6.88002	-11.1486	3.95746	-15.8137	2.78554	-8.34371	14.0373	-18.4558	-5.77418	-8.88534	-0.256308	33.4651	36.7987	0.767312	10.3555	-7.1202	1.40566
59	11.5403	-10.025	3.71082	2.71461	17.7659	-18.8926	4.46202	-3.38198	-17.5144	-14.9674	3.25946	-6.80103	7.87946	-36.7375	-4.28308	-1.2219	-3.01766	-6.84133	4.06869	-5.31315	6.51087	-3.14985	27.0929	-4.85212	-27.0606	-24.4476	-7.82465	8.37434	-4.72316	-17.2951	-4.03161	-6.76234	7.15889	-11.1857	2.20199	-16.8373	4.81021	-9.82675	13.2716	-18.1963	-5.239	-9.564	-0.472316	32.8896	38.7541	-0.122512	11.3195	-6.49797	1.83929
60	10.0234	-10.1379	2.46475	3.81722	17.3403	-18.7314	4.48781	-3.21433	-18.3607	-15.3672	3.64634	-7.37329	7.8456	-37.4871	-5.32444	-0.90272	-2.78231	-7.49096	4.84567	-5.95473	5.91926	-2.57598	27.0993	-5.34539	-28.1294	-24.23	-8.84343	9.90574	-5.06813	-17.2468	-5.19548	-5.90798	7.46517	-10.3813	1.72806	-16.9937	5.28897	-10.0927	12.5559	-17.8481	-8.26311	-10.0121	-0.119288	34.2179	40.0518	-1.13324	12.0094	-5.38408	1.36053
61	10.1959	-9.46889	2.21972	4.77797	18.3865	-18.2978	4.55551	-2.55502	-15.9685	-14.6644	4.30565	-4.96174	7.75211	-37.1759	-5.23255	-0.65286	-1.66036	-7.42487	5.70164	-5.89508	6.33194	-1.95858	28.5485	-5.2922	-27.4717	-23.6738	-8.44204	11.6806	-5.42277	-17.2984	-4.64901	-4.9295	8.84827	-11.3678	1.33957	-16.2506	5.78869	-10.341	12.2641	-17.8465	-8.72737	-9.564	0.119288	35.8896	39.365	-1.28799	11.8998	-5.15679	2.03596
62	9.19646	-8.6919	0.817284	3.69793	18.0786	-19.0168	5.08747	-2.77264	-15.8685	-15.0738	3.20466	-6.75428	8.05355	-37.4967	-5.0649	-0.303056	0.280488	-8.13899	5.9644	-6.03049	7.89558	-2.19554	30.0412	-5.30509	-26.727	-24.2155	-8.90308	12.3802	-5.52432	-17.0985	-4.48942	-4.66029	10.2701	-12.0771	1.87153	-16.3054	3.09826	-8.22765	11.7837	-18.4461	-9.22709	-9.85093	1.15903	36.0024	39.4859	-1.38148	11.3243	-5.67908	1.76998
63	9.82836	-7.86172	0.567424	3.75918	18.6186	-19.2231	4.84728	-3.48192	-16.249	-15.7654	3.89298	-6.13688	6.71398	-36.5747	-5.40504	-0.852748	1.58782	-8.05839	5.89992	-6.05467	7.20564	-0.767312	31.7838	-4.50554	-27.5507	-25.4809	-9.93959	11.9401	-5.59848	-16.581	-3.55285	-4.12994	11.9901	-13.4183	2.38576	-17.0727	2.93223	-7.55222	11.047	-20.7126	-9.74615	-10.7553	0.809224	35.04	39.947	-1.20578	11.5677	-5.22288	1.34118
64	9.11264	-8.58712	1.85219	3.22722	18.7798	-20.1516	5.27124	-3.735	-17.1855	-13.7697	3.43195	-5.80965	5.39375	-37.6595	-5.34056	-0.522288	2.55502	-8.25183	5.46952	-6.5963	8.18574	-0.143468	32.8252	-2.97575	-27.728	-26.5996	-12.3237	10.9632	-5.70487	-17.3919	-2.82584	-3.19015	12.3286	-14.8707	2.20038	-17.1017	2.85646	-7.0251	10.0428	-21.4992	-9.564	-9.88801	1.61684	34.8192	39.2151	-0.893048	11.9481	-5.07135	0.525512
65	9.4979	-8.75316	2.8887	2.43251	20.3563	-19.9179	5.60331	-3.19498	-17.3612	-16.6632	3.99292	-7.25078	3.72211	-35.1223	-5.09876	-0.496496	3.0225	-8.40336	3.65602	-5.28736	8.08096	-0.224068	34.1019	-3.10149	-27.2154	-27.5007	-12.4269	12.493	-5.84189	-17.3741	-1.52656	-2.52117	14.4016	-16.062	1.9747	-17.566	1.57492	-7.50225	9.87834	-21.338	-8.40819	-9.25127	2.31806	34.2663	39.6778	-2.1762	10.7504	-4.8489	0.631904
66	9.9541	-8.31147	4.83922	1.18321	23.2499	-19.4842	4.52327	-3.38198	-14.8884	-19.1344	2.14235	-8.07128	3.90749	-34.4549	-5.25351	-0.377208	2.73879	-9.31414	4.10738	-5.18097	8.81603	0.091884	34.9578	-2.89354	-25.6663	-28.6307	-13.5118	12.5269	-5.47113	-17.7288	-1.00266	-2.73395	16.0265	-16.5391	3.00316	-17.9319	1.47982	-6.49636	8.79024	-21.4847	-8.45978	-8.4356	1.96342	34.3501	40.5079	-2.45346	11.0761	-4.94239	0.907556
67	10.931	-8.91597	5.76451	0.38688	20.9447	-19.1054	4.5813	-3.87041	-13.6504	-19.2698	3.38036	-6.0047	4.4604	-36.5086	-5.10682	0.351416	3.22722	-10.1072	3.91716	-6.1659	8.67095	-0.020956	34.5758	-1.53462	-25.9951	-31.4566	-13.7923	13.9132	-5.79192	-17.7916	-0.909168	-3.2772	16.8019	-17.0614	3.48837	-18.7556	2.07787	-7.39586	8.56939	-21.2558	-8.35983	-8.53876	0.728624	34.3646	41.048	-2.44057	12.5929	-4.82794	1.56848
68	11.018	-8.09546	5.6146	0.699608	24.1623	-19.5842	4.75701	-3.54801	-13.3844	-19.1135	3.92038	-6.04016	4.78119	-36.3587	-5.70809	2.63723	2.08915	-11.4549	3.77369	-5.60492	9.38023	1.24285	34.8434	0.77376	-26.195	-33.5183	-14.8739	10.9455	-5.68391	-17.6595	-0.294996	-2.74685	16.6552	-17.5128	3.29815	-18.1414	0.02418	-6.21748	8.49685	-19.8856	-7.98101	-6.3271	-0.610948	36.112	41.999	-1.35569	12.6993	-4.07352	1.45564
69	10.3571	-7.27334	5.75806	0.883376	23.9382	-19.5068	4.41688	-3.23851	-13.0814	-23.1483	4.80376	-6.18686	5.41632	-38.2657	-5.4131	3.88653	0.933348	-11.8337	3.68826	-5.96601	8.37112	0.546468	33.2733	3.03056	-26.224	-34.1196	-14.4758	9.13037	-6.18686	-17.4838	-0.011284	-3.36908	16.141	-18.2752	2.9693	-17.8078	-0.731848	-6.6221	7.8585	-18.9829	-10.3345	-7.32332	-1.23963	36.8181	42.8099	-2.17781	12.6316	-4.62644	1.28638
70	10.4635	-7.53288	5.74839	0.433628	25.8033	-20.4837	5.54528	-3.89782	-13.0491	-24.6443	4.43461	-6.9042	5.33411	-37.3936	-4.95045	4.39754	0.340132	-11.2469	4.35079	-5.36635	9.40118	1.3831	32.772	5.52916	-25.5357	-33.7843	-13.7987	7.3475	-6.10787	-17.6095	1.03652	-2.85002	17.0743	-18.3526	3.45452	-17.761	1.16709	-6.30292	8.26634	-18.7411	-9.31736	-8.9063	-1.19127	38.2898	42.8856	-0.422344	12.6284	-5.24061	0.806
[truncated: 349 more rows]
[truncated: 803 more columns]

## Sheet: Supplement 1C Uni_20ngEGFMCF7
	X_Cell 0	Y_Cell 0	X_Cell 1	Y_Cell 1	X_Cell 2	Y_Cell 2	X_Cell 3	Y_Cell 3	X_Cell 4	Y_Cell 4	X_Cell 5	Y_Cell 5	X_Cell 6	Y_Cell 6	X_Cell 7	Y_Cell 7	X_Cell 8	Y_Cell 8	X_Cell 9	Y_Cell 9	X_Cell 10	Y_Cell 10	X_Cell 11	Y_Cell 11	X_Cell 12	Y_Cell 12	X_Cell 13	Y_Cell 13	X_Cell 14	Y_Cell 14	X_Cell 15	Y_Cell 15	X_Cell 16	Y_Cell 16	X_Cell 17	Y_Cell 17	X_Cell 18	Y_Cell 18	X_Cell 19	Y_Cell 19	X_Cell 20	Y_Cell 20	X_Cell 21	Y_Cell 21	X_Cell 22	Y_Cell 22	X_Cell 23	Y_Cell 23	X_Cell 24
[truncated: 420 more rows]
[truncated: 863 more columns]

[truncated: 3 more sheets: Supplement 1D GradientMCF10A, Supplement 1D NoEGFMCF10A, Supplement 1D Uni_20ngEGFMCF10A]
