# Supplementary material for: Cells use molecular working memory to navigate in changing chemoattractant fields
Source: eLife. 2022 Jun 6;11:e76825. doi: 10.7554/eLife.76825 (PMC9282860; doi:10.7554/eLife.76825)
Supplement: Figure 3—figure supplement 2—source data 1. [file elife-76825-fig3-figsupp2-data1.xlsx]

## Sheet: Supplement 2B NoEGF
	Cell 0	Cell 1	Cell 2	Cell 3	Cell 4	Cell 5	Cell 6	Cell 7	Cell 8	Cell 9	Cell 10	Cell 11	Cell 12	Cell 13	Cell 14	Cell 15	Cell 16	Cell 17	Cell 18	Cell 19	Cell 20	Cell 21	Cell 22	Cell 23	Cell 24	Cell 25	Cell 26	Cell 27	Cell 28	Cell 29	Cell 30	Cell 31	Cell 32	Cell 33	Cell 34	Cell 35	Cell 36	Cell 37	Cell 38	Cell 39	Cell 40	Cell 41	Cell 42	Cell 43	Cell 44	Cell 45	Cell 46	Cell 47	Cell 48
0	0.258217	-0.265397	-0.0267284	-0.89577	0.93867	-0.820529	0.853715	-0.116093	0.133486	-0.372128	0.985212	0.492057	0.485643	-0.140438	-0.787718	0.908251	0.722902	0.953945	-0.459151	0.755348	-0.0316742	-0.444634	0.757626	0.0933407	0.0272401	0.127452	0.316228		-0.0952371	0.81103	-0.0652453	0.487174	-0.00799974	0.539054	-0.169078	0.887405	0.503515	0.888218	-0.0209014	0.999905	0.837786	0.773493	0.8761	0.459854	-0.360112	-0.0592007	-0.236567	-0.204977	-0.40302
1	-0.548567	-0.912945	0.812132	0.0373571	0.257307	-0.560074	-0.807496	-0.848379	-0.69143	-0.895139	0.0475651	-0.181547	0.570116	-0.493381	-0.685128	-0.999874	-0.583045	0.161489	0.173785	0.139066	-0.364185	-0.953653	-0.45318	-0.380615	-0.296399	0.150977	-0.623487		-0.777941	-0.265362	-0.330816	-0.905882	0.0242843	0.90569	-0.444538	-0.558868	0.848651	-0.897748	-0.108059	-0.147738	-0.314512	-0.464299	-0.114221	-0.166267	-0.997357	-0.841466	-0.296099	-0.918606	-0.828532
2	0.283727	-0.703018	-0.38746	-0.101273	0.199809	-0.301217	0.882008	0.329173	0.0186883	-0.109973	0.507985	-0.216443	-0.125716	-0.272766	-0.544146	-0.53132	0.00243308	-0.0638693	0.709339	-0.397918	-0.224134	0.0948091	0.724597	0.695383	-0.178046	-0.432211	0.425658		-0.17366	-0.154316	-0.17914	-0.331254	-0.112812	-0.100429	-0.440604	0.0634441	0.125879	-0.958184	-0.0213474	-0.200944	0.638755	0.0952441	-0.381664	0.0353477	-0.01033	-0.613941	0.242536	0.958872	0.593317
3	-0.590813	0.116986	-0.487821	0.797178	0.727421	-0.422512	0.325513	0.278434	0.956904	-0.262136	0.0819156	0.439776	0.468191	-0.421851	-0.12522	0.0995037	0.265391	0.221353	0.263015	0.257902	0.642952	-0.212255	-0.391947	0.687127	0.405734	0.364056	0.0411237		0.335825	-0.296399	0.340321	0.593409	-0.128269	-0.334311	-0.664364	-0.525261	0.0508894	0.862321	-0.563939	0.0596673	0.35472	0.616691	-0.987122	0.163718	0.281704	-0.106876	0.125555	0.561669	-0.478124
4	-0.157649	-0.526882	-0.189657	-0.836788	-0.147534	-0.207231	0.396403	-0.00309596	0.0820101	0.139728	0.419989	-0.533909	0.0800989	-0.00966138	-0.369587	-0.587623	-0.18399	-0.111128	-0.447214	-0.0619923	0.345304	0.0858245	-0.053216	-0.618347	-0.183303	-0.161851	0.0880675		0.0530039	0.6	-0.226028	-0.473893	-0.379223	-0.721845	0.121891	-0.186239	0.0688783	0.106814	-0.53944	-0.206959	-0.294318	0.447214	0.1389	0.324122	0.396322	-0.376028	-0.099131	0.312153	-0.167869
5	-0.22381	-0.266597	0.00304181	-0.0963022	0.192358	-0.153694	0.483026	-0.205977	-0.235164	-0.0231454	-0.0926407	0.0310113	-0.0204823	-0.446103	-0.139276	0.205876	0.0589719	0.0617595	0.0490764	-0.0103657	-0.0770064	0.0856014	0.375504	0.351608	0.0104306	-0.0714937	0.256474		-0.027858	-0.0951083	-0.217829	-0.122878	-0.162166	0.0662088	-0.0289036	-0.587305	-0.0621103	0.284714	0.128175	-0.0121744	-0.0330588	-0.0885859	-0.146141	-0.327277	0.167566	0.0204039	-0.0347308	-0.152003	-0.0297603
6	-0.00468014	-0.784635	-0.483563	0.608139	-0.504231	-0.942769	0.38606	-0.700228	0.150676	-0.388385	-0.00557871	-0.604241	0.288724	0.485643	-0.599761	0.380845	0.100165	0.107073	0.10725	-0.140252	-0.559095	-0.444764	0.00674748	0	0.137734	-0.0562488	-0.149309		0.319515	0.158955	-0.29804	-0.868243	-0.403167	0.799224	0.0955208	-0.464549	0.0440558	-0.724829	0.226649	-0.341321	-0.497231	0.113378	0.229161	0.45305	0.083374	-0.0213674	-0.226513	0.32033	-0.194092
7	0.0451347	-0.521665	0.0372957	-0.416048	-0.271188	-0.370561	0.850825	0.188459	0.0951772	-0.0703738	-0.0145616	-0.0114338	0.136806	-0.637765	-0.244809	0.474273	-0.197094	0.129634	0.574512	-0.389217	-0.0159184	0.133475	0.974613	0.0277266	-0.161246	0.111219	0.0954983		0.118312	0.111645	0.159616	-0.566953	0.00862037	-0.980101	-0.275149	0.56707	-0.20432	-0.220641	-0.0123278	-0.274721	0.536672	-0.309586	-0.177799	-0.456395	0.0771816	0.212623	0.101004	0.224026	0.0939226
8	-0.14671	-0.539877	0.88198	-0.786012	0.607319	-0.0193512	0.970934	-0.27146	0.269296	-0.290112	0.700499	0.916696	0.772726	0.390016	-0.631271	-0.0905357	-0.284088	0.996738	-0.03322	0.997521	0.834087	0.355995	0.302935	0.924678	0.93399	0.991061	0.887018		-0.0213855	0.444412	-0.36303	-0.28435	0.782349	0.849131	-0.0749862	-0.874708	0.938317	0.178885	-0.325687	0.551488	-0.031431	0.323733	0.817526	0.850521	0.983777	0.122527	0.368846	0.999948	-0.336787
9	0.0206567	-0.99648	-0.626135	-0.185101	-0.616805	-0.993388	0.494554	0.348777	-0.325401	-0.312153	0.985622	-0.99308	-0.878008	-0.998205	-0.814392	-0.178304	-0.920444	0.991228	-0.336336	-0.374789	0.637725	0.0239452	-0.802631	0.927242	-0.13109	0.506831	0.870978		-0.429506	-0.566731	-0.471877	-0.911108	0.147619	-0.962931	0.116748	-0.023884	-0.970496	-0.8	0.939793	0.2517	0.560213	0.585376	0.166014	-0.484061	0.0958138	0.588916	-0.256435	-0.895886	0.522738
10	-0.309652	0.42364	0.080277	-0.922947	0.999647	-0.909654	-0.153787	0.299071	-0.664364	0.460317	-0.298899	-0.587937	0.559473	0.516624	-0.0438377	0.742023	0.397324	-0.243523	-0.171773	-0.177936	0.074923	0.0975393	0.543723	-0.752824	-0.292419	-0.0188272	0.305811		0.468173	0.758317	-0.421588	-0.44439	-0.9319	0.99584	0.388741	-0.445845	0.229161	-0.514496	0.00947825	0.236352	0.724676	0.151324	-0.351788	0.604195	0.537291	-0.529999	0.553042	0.331364	-0.843661
11	-0.571494	-0.946598	-0.194184	-0.468876	0.521746	-0.439089	0.49172	0.413657	0.0327693	-0.0806191	0.113408	-0.778607	-0.0431071	-0.808261	-0.951125	-0.336089	0.290112	-0.0855066	0.328012	0.853396	-0.841295	-0.296586	-0.166339	0.79304	0.602048	-0.270111	0.908772		-0.673604	0.715066	-0.255341	-0.363019	0.177964	0.3676	0.0628271	-0.810326	0.769758	0.696671	-0.395964	-0.744468	-0.541262	-0.929927	-0.108448	-0.0505346	-0.81805	-0.215964	-0.335381	0.589841	0.141421
12	-0.993566	-0.767733	-0.571898	-0.16328	-0.215842	-0.653077	0.422278	0.0947052	-0.0323571	0.193531	-0.562578	-0.182373	0.542678	-0.931401	-0.289865	0.960888	-0.0740535	-0.296881	-0.992665	-0.0898925	-0.57762	0.250885	0.181134	-0.237647	-0.0262255	0.46683	0.300222		-0.0116497	0.21295	0.227174	-0.603108	-0.874865	-0.634943	0.249492	0.756024	-0.661622	0.687162	0.311177	0.272451	-0.405221	0.385733	0.272443	-0.0950452	0.670456	-0.408734	0.167595	-0.0103087	0.192141
13	-0.503467	-0.361775	0.304776	-0.648797	-0.340366	-0.737883	0.895694	-0.736038	-0.0781231	-0.334068	-0.485235	-0.974826	-0.567393	-0.214525	-0.856497	0.996493	-0.171341	0.374789	-0.139516	0.629509	0.0669323	0.334765	0.333466	0.643067	-0.222825	-0.31959	-0.384091		-0.29009	0.429386	-0.772726	-0.645942	-0.256791	-0.236098	0.0333148	-0.719619	0.903278	0.192188	-0.600262	0.961356	0.682055	-0.314868	0.998228	-0.313631	-0.62302	-0.8726	-0.696602	0.914148	-0.863528
14	-0.616364	-0.64297	-0.998316	-0.32092	0.896785	-0.393241	0.910462	-0.227653	-0.457143	-0.76919	-0.497016	-0.677154	0.643361	0.522285	-0.818251	0.401058	-0.96568	-0.542715	0.0776303	-0.812324	0.0845179	-0.818258	0.115021	-0.973243	-0.479605	-0.746513	-0.935573		0.896479	-0.462244	-0.810076	-0.992656	-0.989116	0.937827	0.104467	-0.981021	-0.233373	0.752577	-0.958773	0.991131	-0.984927	-0.844509	-0.999983	-0.537557	-0.0930018	-0.40199	0.0527897	-0.833964	0.951585
15	0.218636	0.157667	0.304263	0.163185	-0.12562	-0.159122	0.825183	-0.178237	-0.210737	-0.0273294	0.394313	-0.285724	-0.0567267	-0.0616403	0.0719778	-0.439624	0.590319	-0.0883007	0.184289	0.1444	0.459499	-0.250094	0.73382	-0.0690655	0.206585	0.162621	0.252023		0.16944	0.108204	0.122005	0.00491395	0.197939	0.286475	0.0156231	0.517472	0.150923	-0.00756408	0.0231956	0.616882	0.34895	0.0370858	-0.0439575	0.0565843	0.463743	-0.187409	-0.0353477	0.488784	0.534144
16	-0.104796	-0.219893	0.314425	0.75805	-0.0894945	-0.102569	0.702854	0.188556	0.241278	0.299995	0.032823	0.0463636	0.415115	-0.445041	0.355313	0.298844	0.00177462	0.130706	-0.327292	0.3151	-0.187858	0.322372	0.151425	0.499838	0.563744	0.0284669	0.314133		0.171296	0.353181	-0.235103	0.157716	-0.0998633	-0.420887	-0.95448	0.175324	0.469015	0.602273	-0.281059	0.409206	0.839159	0.0771686	0.252881	0.471432	-0.0108871	-0.245261	-0.332566	-0.103798	0.384809
17	-0.867572	-0.12336	-0.242536	-0.71154	-0.593199	-0.782957	-0.0518171	0.218491	-0.89884	-0.708701	-0.45905	-0.345496	0.629411	-0.899235	-0.83343	-0.867204	-0.233121	-0.268618	-0.792555	-0.279556	-0.590957	-0.155349	-0.414128	0.971545	-0.159915	0.207326	-0.451359		-0.734803	-0.772477	-0.783498	-0.275344	-0.281053	-0.692607	-0.287737	-0.433731	-0.419629	0.249878	-0.919622	-0.061763	-0.682698	-0.159232	-0.733607	-0.362446	-0.821339	-0.727951	-0.513652	-0.0933407	-0.995953
18	-0.0613669	-0.337375	-0.155854	0.334258	0.293441	0.0770687	0.44653	-0.00468598	0.287687	0.22297	0.0699602	-0.0940342	0.173221	0.556249	0.264125	-0.136293	0.117951	-0.236174	0.421036	0.401477	0.190947	0.37582	0.245773	0.228581	0.315955	0.24005	0.136394		0.167284	0.156825	-0.25391	-0.0701097	-0.204242	0.363767	0.277469	0.227822	0.24029	0.159454	0.158668	0.34311	-0.0700192	0.39353	0.228985	-0.139801	0.15039	-0.388734	0.451304	0.0324906	0.243613
19	-0.51404	0.0114018	-0.355424	-0.726231	-0.242317	-0.657406	-0.102899	-0.270875	-0.0756836	-0.456909	-0.432388	-0.464695	0.507156	-0.665973	-0.92787	0.522643	-0.112125	-0.269314	0.170659	-0.104796	-0.344548	-0.430041	0.0950955	-0.735029	-0.801746	0.176889	0.441029	-1	-0.412508	-0.655155	-0.76596	-0.724909	0.0283574	0.188348	-0.793041	-0.322264	-0.301892	-0.477259	-0.572225	-0.569354	-0.534121	-0.58494	0.225555	-0.849189	-0.239649	-0.635028	-0.172001	-0.710299	0.0516071
20	-0.961524	-0.995799	-0.948683	0.990124	-0.0562488	0.267644	-0.438593	0.889288	0.345794	-0.857493	-0.998371	-0.221244	0.13598	0.919696	0.270952	0.694421	0.866622	0.6	-0.156699	0.995427	0.833317	0.805651	0.371391	0.992001	0.296082	0.0376499	0.876947	1	0.756108	0.472818	-0.997658	0.174894	-0.513665	-0.84523	0.929372	-0.42914	0.0610371	-0.985736	-0.252497	0.271729	0.990499	-0.260275	0.721988	0.969963	0.852171	-0.505835	0.337003	0.767683	0.892122
21	-0.738373	-0.563209	-0.903986	-0.015859	-0.556927	-0.67194	-0.692532	-0.999659	-0.0133971	-0.667411	-0.850396	0.880994	-0.229793	-0.908759	-0.851792	0.542777	-0.969122	-0.909719	0.840297	0.52037	0.729951	-0.575954	-0.202755	-0.58007	-0.898113	-0.166858	-0.972082		-0.451614	0.61693	-0.952194	-0.057175	1	0.90849	0.24359	-0.635842	0.11018	-0.664684	-0.555796	0.475517	-0.999339	0.371391	-0.272322	-0.431587	-0.946612	-0.992478	-0.754455	-0.864348	0.970143
22	-0.70228	-0.798442	-0.889104	-0.601285	0.302244	-0.919227	-0.994199	-0.383484	-0.681481	-0.810679	-0.702145	-0.980275	0.884193	-0.447782	-0.999883	0.343364	-0.613941	-0.463676	-0.0797452	-0.787056	-0.526503	-0.875372	-0.764404	-0.969341	-0.294276	-0.441597	-0.878055		-0.750714	-0.24599	-0.93185	-0.999285	-0.748416	-0.692785	-0.33327	-0.353057	-0.289005	-0.757834	-0.534083	0.0132439	-0.75405	-0.67828	-0.433899	-0.193712	-0.999993	-0.720918	-0.997011	-0.768899	-0.610587
23	-0.397494	-0.967997	0.368133	0.105015	0.383157	-0.281224	-0.994052	0.0419735	0.343993	0.0544009	-0.167694	0.613727	0.175033	0.471669	0.0774692	-0.380028	0.765185	0.171341	0.0438408	0.304919	-0.196116	-0.736293	0.4741	0.858437	0.339571	-0.128789	0.445376		0.0863515	-0.130357	-0.387275	0.0693308	-0.00347824	0.0859368	0.0206797	0.27358	0.317303	-0.0557385	-0.339962	0.373776	0.767835	0.650601	-0.0387011	0.240274	-0.875355	-0.528187	0.931487	0.259516	0.973863
24	-0.614544	-0.860685	-0.865827	-0.999819	-0.532235	-0.888998	-0.503745	-0.0819322	-0.358794	-0.161395	0.227884	-0.400949	0.705527	-0.150319	-0.159148	-0.81058	-0.328169	-0.262786	0.0725553	-0.205872	0.955675	0.767939	0.0518963	-0.868919	-0.777941	-0.231432	-0.162052		-0.193673	-0.488752	-0.618418	-0.656572	-0.66422	0.0158396	-0.863139	0.934925	0.380207	0.986789	-0.921317	-0.413453	-0.776114	-0.564007	0.0619923	-0.24394	-0.673962	-0.914568	0.357268	0.425122	-0.326161
25	0.292942	0.133918	0.578975	-0.937256	0.327487	-0.520258	-0.524683	0.477057	0.962309	0.123002	0.176433	0.436861	-0.0398456	0.0241309	0.173785	-0.68847	0.481641	0.519055	0.603709	0.558627	0.572315	0.0264458	0.0723786	-0.349711	0.71309	-0.167744	0.297635	-1	0.637782	0.53825	-0.937879	0.146245	-0.470588	0.771758	0.271236	-0.0233482	-0.032556	0.894427	-0.928115	0.486659	-0.0688783	-0.247833	-0.0835167	0.616509	0.839712	-0.889523	0.294677	0.204763	0.181598
26	-0.371114	-0.996841	-0.630816	-0.668965	0.165323	-0.30782	-0.98122	-0.993533	-0.995064	-0.313153	-0.964721	-0.317361	0.999873	-0.707107	-0.999997	0.200348	-0.168868	-0.606043	-0.844856	-0.241699	-0.929333	0.870441	-0.647102	0.0747259	-0.678973	0.133918	-0.0374491	1	-0.487645	-0.294763	-0.675013	-0.849441	-0.837469	-0.175791	-0.717523	0.347742	-0.614498	-0.808666	-0.377214	-0.147189	-0.932256	-0.0512838	0.897171	-0.678742	0.119508	-0.869531	0.596561	0.0342478	-0.766209
27	-0.8	-0.861116	0.770645	-0.638212	-0.445911	-0.071247	0.20143	-0.169907	-0.0310272	0.954058	0.760834	0.7098	0.99423	0.986245	0.429934	-0.960564	0.897554	0.942176	0.0387119	0.683109	0.729537	0.961341	0.484279	-0.996049	0.413683	0.227988	0.959161		0.673604	0.451882	-0.937963	-0.915126	0.597118	-0.0211035	0.0903214	-0.290007	0.787505	0.239019	0.277654	-0.0720051	0.926467	0.0437537	0.230025	0.982487	0.999021	-0.958184	0.850265	0.999777	0.966277
28	0.911587	0.0954526	-0.392841	-0.103805	0.182618	-0.508858	-0.584739	-0.997925	0.278243	-0.998516	0.578017	0.113715	-0.425797	-0.298872	-0.837166	-0.587346	0.940062	-0.236215	-0.420923	0.389911	-0.164399	0.741384	-0.0791163	0.970973	-0.619045	0.99753	0.856129		0.352455	-0.485328	-0.513751	0.494343	0.449884	0.0379954	0.239019	-0.419637	-0.346536	-0.623653	-0.81228	-0.750176	0.974472	0.548357	0.52783	0.547152	0.977323	-0.979929	0.936155	0.999946	0.989461
29	-0.999873	-0.982508	-0.838753	-0.897615	-0.883373	-0.552585	-0.250962	-0.402153	-0.240228	-0.632376	-0.531223	-0.545155	-0.167873	-0.701816	-0.709524	-0.228695	-0.982365	-0.17795	-0.108023	-0.51366	-0.601999	-0.529677	-0.385322	-0.509664	-0.299308	-0.551786	-0.299708		-0.843137	-0.333149	-0.832654	-0.254146	-0.221082	-0.371896	-0.263533	-0.954391	-0.212757	-0.663799	-0.919145	0.357647	-0.86868	-0.327292	-0.230805	-0.584213	-0.933588	-0.705681	-0.888338	-0.575322	-0.9719
30	-0.651458	-0.376798	-0.466285	-0.242481	-0.997925	-0.702297	-0.784726	-0.69238	-0.860257	0.310893	-0.800865	-0.827076	0.999923	-0.976073	0.760322	0.653309	-0.398093	0.14834	-0.587536	0.707107	0.392989	0.992543	-0.478852	0.952424	-0.420999	0.326488	0.487625		-0.201224	-0.0103621	-0.983935	-0.506053	-0.99064	0.523843	0.131889	0.788968	-0.84693	0.290007	-0.203	0.745837	0.903064	0.71123	0.472757	0.296183	0.540758	-0.949411	0.126192	-0.541246	0.760462
31	-0.271016	-0.111775	-0.182797	-0.354672	-0.862046	-0.933949	-0.827393	-0.999281	0.466557	0.860292	-0.459423	-0.984731	0.80703	-0.814212	-0.866138	-0.730651	0.885832	0.7179	0.977957	0.919145	0.513539	-0.989425	0.611761	0.998845	-0.0162141	0.931655	0.997487		1	0.503018	-0.994379	-0.591364	0.191211	-0.987105	0.713767	0.867224	-0.358979	0.692997	0.364056	0.306912	0.981734	-0.171686	-0.16298	-0.83073	-0.0735331	-0.827919	-0.433402	0.999323	0.535335
32	0.339758	-0.510841	-0.708842	0.581456	-0.0484866	-0.0529211	-0.433473	0.306902	0.0545544	0.128915	-0.525994	-0.464365	0.945822	-0.91082	-0.343478	0.973859	-0.0572309	-0.383606	0.633714	0.217748	0.363176	0.709031	-0.134257	-0.780607	-0.331028	-0.334365	0.475343		-0.347097	0.236871	-0.711254	-0.999675	-0.0958864	-0.232525	-0.246679	0.705527	0.888303	0.0127748	-0.746339	0.995893	-0.287348	-0.433336	0.317923	0.670707	-0.00603611	-0.502492	0.678914	0.987241	0.72789
33	0.194513	-0.829004	0.533664	0.092705	-0.0047003	-0.291296	0.150076	-0.152593	-0.173827	0.0651432	0.09651	0.12224	0.113411	0.167843	-0.21533	0.387308	0.122614	0.405174	-0.278757	0.0344623	0.205194	0.432232	0.170475	0.0125688	-0.469298	0.0618758	-0.0402642		-0.0264225	-0.225032	-0.0914032	-0.41231	-0.0673626	-0.0870607	0.211172	0.425546	-0.324685	0.214527	0.402547	-0.138222	-0.465954	0.0914189	0.175324	-0.274862	0.282996	-0.283234	0.226186	0.182027	0.23044
34	0.810784	-0.782091	0.96143	-0.644342	-0.208108	0.163318	0.271729	0.734803	0.949926	-0.988799	0.307292	-0.652884	-0.725152	-0.965325	-0.0507819	-0.999989	0.382933	0.435668	0.267522	0.780607	0.543391	-0.367428	-0.254493	0.196116	0.989556	0.662453	0.928477		0.94112	0.691523	-0.0145333	-1	0.921555	-0.83697	0.328415	0.99791	0.858035	-0.871797	-0.777245	0.982407	0.805056	0.967956	0.838082	-0.786573	-0.226236	-0.572315	0.351464	-0.568327	0.567078
35	-0.239847	-0.724105	-0.522518	0.479824	-0.46854	-0.361661	-0.763842	-0.316902	0.0149528	-0.00245097	-0.591761	-0.861719	0.957043	-0.580882	-0.7234	-0.596946	-0.548026	0.284088	0.567503	-0.181214	-0.797867	-0.812538	-0.840941	0.353357	-0.0405855	0	0.0436175		-0.600531	-0.591364	-0.290482	0.016101	-0.35169	-0.703649	-0.538553	0.158327	-0.634859	-0.636434	-0.458582	-0.122193	0.375035	-0.560059	-0.434263	0.14267	-0.781579	-0.995243	-0.0283797	0.83045	-0.860181
36	0.515102	0.389578	0.933795	-0.0369832	0.596178	0.375068	-0.50258	0.991976	0.27553	0.795946	0.952454	-0.786879	-0.850406	0.21243	0.977089	0.930041	0.345977	0.999041	0.223415	0.816851	0.809554	0.43705	0.355651	0.923077	0.507519	0.714669	0.971991		0.761939	0.694415	-0.855138	-0.984271	0.816271	0.686542	0.622548	0.459111	0.951709	0.958673	-0.00366298	0.814567	0.995213	0.997258	-0.259171	0.300737	0.845839	-0.865202	0.632171	-0.688749	0.999995
37	-0.294723	0.0102334	-0.0282301	-0.790759	-0.0539963	0.119976	-0.666538	-0.218485	-0.962064	-0.0388278	0.129249	-0.501798	0.724969	0.0403621	0.0378348	-0.433267	0.36123	0.231861	-0.265481	0.250461	0.141171	0.381549	0.0726025	0.128799	-0.146954	-0.202432	0.0995037		0.199197	0.343064	-0.359732	-0.300733	0.134906	0.293595	0.00951641	0.11849	-0.0538898	0.0356915	-0.111568	0.356103	-0.690962	0.0911883	0.887663	-0.0976361	0.47941	-0.160202	0.487391	0.230726	0.252422
38	-0.767835	0.11219	-0.842522	-0.940165	-0.918947	-0.292278	-0.0553757	-0.275825	-0.432991	-0.534642	-0.817193	-0.79872	0.742011	-0.139255	-0.84284	0.940961	-0.547088	-0.210305	-0.214001	-0.936554	-0.191979	0.937939	0.140373	0.333532	-0.282242	-0.686061	0.014183		0.221059	-0.5614	-0.499324	-0.923524	-0.756687	-0.909765	-0.571064	0.859561	-0.735698	-0.792934	-0.951411	-0.967356	0.941075	-0.643424	-0.754371	0.83205	-0.978315	-0.999081	0.677681	0.653127	-0.676625
39	0.0580736	0.889751	-0.376282	0.126944	0.0283757	0.0668713	-0.0702233	-0.824692	-0.282868	0.0855954	-0.00449771	-0.260382	0.148913	-0.457009	-0.364399	0.284559	0.107385	0.18196	0.298116	0.177491	0.417446	-0.29055	0.247764	-0.428954	0.21664	0.765486	0.768691		-0.0392103	0.141421	-0.388411	-0.132096	-0.623242	0.927225	0.117872	-0.0325031	-0.328521	0.385414	-0.0589689	0.160853	0.66645	0.272471	-0.160841	-0.106132	-0.0534947	-0.243144	0.232466	0.126036	0.184002
40	-0.774994	0.786721	0.0916758	-0.980747	-0.923697	-0.19151	0.224654	0.28	0.230182	-0.782037	0.00735274	-0.851963	0.99935	-0.685832	-0.619471	-0.367393	-0.910853	0.109431	-0.966838	-0.330136	-0.53639	-0.505118	-0.546789	-0.918002	-0.343431	0.567733	0.310943		0.0937877	0.474326	-0.2376	0.651497	0.888155	0.0186535	-0.191691	-0.610228	0.968664	-0.845489	-0.264326	0.911922	-0.99307	0.578954	0.612609	-0.406909	-0.546596	-0.805471	0.38964	0.953365	-0.465746
41	-0.30646	0.1705	-0.466329	1	0.783317	0.994692	-0.460066	0.732232	0.684334	-0.411961	-0.329492	-0.978106	0.237564	-0.105233	0.00537627	-0.613571	0.991201	0.406757	0.308807	0.540476	0.655473	0.857042	0.669512	0.450677	-0.215978	0.375349	0.701983		0.314156	-0.163682	-0.527857	-0.535496	-0.246488	-0.943904	-0.901637	-0.333447	-0.0107232	0.127971	0.776756	0.749147	-0.366913	0.335381	-0.262128	-0.415662	0.334545	-0.998236	-0.00947825	-0.44221	0.98349
42	-0.0949959	0.856018	0.412437	-0.570645	0.808736	0.995295	0.25976	0.264561	0.246244	-0.919145	-0.0173585	-0.512917	0.745863	-0.563744	0.938876	0.628454	-0.33154	-0.871467	-0.112234	0.397835	-0.0654332	0.478303	0.160071	0.999984	0.693039	-0.0582478	0.826419		0.348187	0.453876	-0.261508	0.211109	0.703101	-0.573685	0.556311	-0.803978	0.0518781	-0.676449	0.0285598	0.99611	0.920207	0.996325	0.548519	-1	-0.820398	-0.162447	0.99842	0.611286	0.803237
43	-0.637373	0.160777	-0.886383	-0.998673	-0.649563	-0.635707	-0.201792	-0.467593	0.215423	-0.805056	-0.825599	-0.986518	-0.686366	0.436406	-0.728022	0.713159	0.331906	-0.613425	-0.999392	0.390994	0.64372	-0.568365	0.0554033	-0.675373	-0.538691	-0.0950226	0.463909		-0.425561	-0.132955	-0.162302	-0.895519	0.928477	-0.143675	-0.856581	-0.99565	0.967075	-0.301621	-0.987288	0.930624	-0.99885	-0.57727	-0.79248	0.820905	0.491094	-0.953473	-0.823648	-0.389716	-0.802714
44	0.802713	0.999999	-0.317291	0.342119	0.0962627	0.999746	0.557626	0.335622	0.892878	0.50526	0.687803	0.0921068	-0.556388	0.427006	0.105655	0.438247	0.398163	-0.163956	0.754112	0.580403	0.695505	0.10386	0.680379	0.613831	0.273015	0.547976	0.548876		0.558713	0.390068	0.706239	0.997974	0.519068	0.432697	0.208684	-0.352265	0.362313	0.117537	0.56104	0.868395	0.384728	0.434453	0.439133	0.147266	0.514787	-0.0504716	0.42249	0.666456	0.731894
45	-0.30782	0.691092	-0.968817	-0.523814	-0.999713	-0.461152	0.663393	-0.687359	-0.977341	-0.828283	-0.996303	-0.991349	0.916592	-0.782424	-0.714868	-0.776253	-0.976049	-0.988753	-0.0774526	-0.579909	-0.512278	-0.649262	-0.971936	0.936688	-0.567546	-0.991454	-0.923235		-0.482861	-0.619644	-0.497026	-0.435169	-0.783498	-0.979213	-0.166928	-0.168837	-0.835649	-0.488603	-0.170644	-0.80297	-0.865179	-0.959366	-0.892413	0	0.830508	-0.914105	0.89055	-0.930102	-0.99763
46	0.244716	0.535692	-0.247566	-0.247619	-0.0587883	-0.925325	0.5547	0.999921	-0.57174	0.0368075	0.365164	-0.867014	0.0956052	-0.409319	-0.134092	0.63611	-0.0801336	-0.377001	-0.465746	0.53817	0.984237	0.427856	-0.06805	-0.548061	0.997366	0.119687	0.15603		0.0288169	0.126036	-0.116841	-0.6	0.142408	-0.628464	-0.906792	-0.108625	-0.0202271	-0.0690741	0.931401	0.051096	0.277161	0.105503	0.338543	-0.498355	0.716075	-0.763859	0.135244	0.899235	-0.193104
47	-0.98629	-0.865651	-0.99935	-0.918324	-0.507853	-0.846289	0.546933	-0.986676	-0.999565	-0.824513	-0.847796	-0.998947	0.398475	-0.819759	-0.997872	0.726148	-0.782743	-0.760431	-0.378298	-0.686624	-0.958129	-0.933795	-0.085263	-0.997579	-0.998153	-0.632998	-0.652039	-1	-0.995893	-0.999541	-0.56921	-0.72294	-0.949456	-0.878544	0.409815	-0.889312	-0.347146	-0.996775	-0.867786	0.337865	0.99222	-0.432941	-0.170917	-0.0654332	0.967075	-0.624935	-0.901385	0.642612	-0.542635
48	0.840039	0.950697	0.999728	0.995324	0.302447	0.983973	0.621774	0.780532	0.572895	0.136085	0.994646	0.83205	-0.777511	0.929097	-0.83473	0.69183	0.951838	0.812403	0.454849	0.973688	-0.703471	0.634547	0.31366	0.961405	0.68029	0.631571	0.835436	1	0.816111	0.521856	0.418527	0.499059	0.344468	0.851171	0.989051	0.641677	-0.0201979	-0.346062	0.823672	0.979351	-0.993566	0.267226	-0.263117	0.493874	-0.0193201	-0.0882618	0.997963	-0.436274	0.734065
49	0.512537	0.304776	-0.564684	0.682942	-0.829722	-0.947426	0.99683	-0.868243	-0.340366	0.953342	-0.997575	-0.791457	0.737889	-0.942428	-0.0495259	-0.202092	-0.260769	0.245157	-0.300688	0.457253	0.0894361	0.945796	-0.894427	0.0842069	0.0354169	-0.99383	0.0754149		-0.933472	-0.481759	-0.233243	-0.632008	-0.899953	0.70403	0.374322	0.0923457	-0.222537	-0.943091	-0.911304	-0.94346	0.95156	0.970143	0.0543856	0.580837	-0.578017	-0.626712	-0.733724	-0.931243	0.353706
50	-0.330743	0.953772	-0.46447	-0.0529729	-0.936329	0.618031	0.609481	-0.360904	0.277118	0.033651	-0.171929	0.727536	-0.461985	-0.502774	-0.415106	0.961925	0.859155	-0.42827	0.631059	0.999062	0.475819	-0.820451	0.472666	0.953661	0.143702	0.340171	0.0861833		0.576463	0.552813	-0.0715955	0.396091	0.486094	-0.866279	0.929842	0.589997	-0.0838162	0.456527	0.228736	0.983757	-0.916313	-0.234904	0.828178	0.428487	0.628761	-0.698146	0.420345	0.992978	0.699958
51	0.136295	0.0818569	0.00769208	0.435293	0.30471	0.192883	0.480696	0.100115	0.900844	0.00432428	0.252012	-0.164127	0.361892	0.255165	0.124322	0.261773	0.060132	0.0674587	-0.164149	0.152169	0.269288	0.303204	0.134939	-0.248327	0.00132802	0.0797177	0.0778159		0.0122222	0.223528	-0.0140375	0.0738717	0.263859	0.345339	0.11784	0.210925	0.0224662	0.211802	-0.0806256	0.282397	0.184428	0.0226328	-0.0777583	-0.240813	0.14391	-0.0602886	0.17775	0.177119	0.291498
52	0.112592	-0.109057	-0.234724	-0.0521136	-0.250457	-0.116412	0.414632	-0.181736	-0.24898	0.0912657	-0.108824	-0.255077	0.218038	-0.0255465	-0.0836403	-0.198622	-0.0284515	-0.0957918	0.0280411	0.185382	0.0902662	-0.0854422	-0.0144494	-0.0685668	-0.137259	-0.186071	0.13105		0.135491	-0.00895677	-0.181453	-0.328455	-0.0635698	-0.309334	-0.335079	-0.118911	0.0377386	-0.242834	0.0420554	-0.0314986	-0.0170969	0.0466441	0.012843	-0.0725662	-0.191559	-0.0363575	0.0931068	0.0876491	-0.131818
53	0.354397	0.174019	-0.134404	-0.489165	-0.738861	0.131636	0.699582	-0.188789	-0.262844	-0.77897	-0.049483	-0.487794	-0.0965056	-0.0846013	0.00657016	-0.249271	-0.0804046	0.281586	-0.542989	0.165556	0.160247	0.0139602	-0.0630215	-0.290421	-0.123569	-0.168489	0.068562		-0.293965	0.153845	0.575545	-0.105183	0.249576	-0.261195	0.032823	-0.186284	-0.0706989	-0.416077	0.94651	-0.134941	0.220069	-0.530099	-0.651312	-0.102011	-0.37391	-0.132675	-0.155275	0.287034	0.473023
54	-0.962164	0.919778	-0.319578	0.702976	0.338121	-0.0312348	0.999939	0.419058	0.407422	0.458643	-0.406138	-0.634605	0.898113	-0.546565	-0.527516	-0.406478	0.319531	0.59239	-0.460597	0.837952	0.875514	-0.809942	0.296873	-0.616308	0.344255	0.406919	0.00292396		0.700297	-0.656057	-0.383319	0.690764	-0.339644	-0.912818	-0.998943	-0.194336	0.570488	-0.123707	0.401661	0.00706197	-0.922654	0.0835062	0.273744	-0.0702076	0.721546	-0.786318	-0.331693	0.0525588	0.10072
55	-0.859136	0.165612	-0.52836	-0.911977	-0.0814066	-0.946773	0.95069	-0.390931	0.223234	-0.763175	-0.0565133	-0.912369	-0.0233854	-0.839408	-0.990955	-0.73562	-0.996973	-0.731269	-0.649781	0.00334446	0.988012	-0.749927	-0.45498	-0.951926	0.478243	-0.837435	-0.864938		-0.983373	-0.243242	-0.457746	-0.641262	0.128243	-0.805467	-0.554186	0.297097	0.776817	-0.979375	-0.156517	0.35676	0.0419798	-0.021734	-0.459805	-0.786318	-0.930196	-0.543062	-0.917754	-0.605367	-0.86753
56	-0.593542	0.362802	-0.946582	0.422885	-0.116486	0.971873	0.966705	0.994949	0.428086	0.268181	0.109233	-0.847026	-0.622927	0.918633	0.470953	-0.828391	0.0706563	-0.936482	-0.112622	0.993631	0.241806	0.851342	0.776349	-0.0341265	0.701689	0.343538	0.501718		0.673849	-0.312374	0.128904	-0.373611	-0.185408	0.601229	0.698034	0.572025	0.38964	-0.413095	-0.104861	0.317515	0.83205	0.789352	0.752856	0.589408	0.401589	-0.720543	0.168361	-0.904621	0.470742
57	-0.250258	0.328717	-0.477999	0.160594	0.199687	0.0841164	0.221087	-0.536993	-0.568327	-0.1512	-0.0316001	-0.315908	0.100775	-0.324501	-0.241561	-0.980639	0.081533	-0.163395	0.244612	0.209775	0.455173	0.171946	0.0269855	-0.0931603	0.0631852	-0.127911	-0.183868		0.0148232	-0.595414	-0.151551	-0.0176184	-0.0247073	-0.20601	-0.224065	0.547786	0.0654332	-0.0609366	0.456916	0.248209	0.240746	-0.122427	-0.0145052	-0.0642185	0.0287356	-0.189956	0.169907	0.358979	0.267757
58	0.349428	-0.00779703	0.0275757	-0.328061	-0.339265	0.406641	0.258405	0.414811	0.188389	0.189984	0.124592	0.561941	0.166887	0.492122	-0.676835	0.815831	0.588739	-0.293941	-0.340649	0.894427	0.897205	0.479306	0.408557	0.300475	0.655759	0.448637	0.178379	-1	-0.0446838	0.0358937	0.069109	0.546268	0.107221	0.43286	0.791147	0.627474	-0.247488	-0.177635	0.360028	0.374618	-0.21314	-0.250962	0.262202	-0.0999339	-0.0166644	-0.386727	0.352528	0.92125	-0.149276
59	-0.351895	-0.853282	-0.511621	0.151901	-0.258701	-0.305944	0.569759	0.0330944	-0.0864674	-0.925947	0.14101	0.31448	0.707107	-0.887217	-0.812345	0.223715	-0.7656	0.345705	-0.411522	0.999396	0.385408	0.434749	0.187233	0.086134	-0.679134	-0.406582	0.802568	1	-0.959737	-0.782852	-0.59655	-0.158798	-0.819088	0.440859	-0.0953088	0.160169	0.0986616	0.636881	0.0329917	0.220078	-0.635775	0.272189	-0.727847	-0.16201	0.892513	-0.189718	0.528302	-0.574426	0.454672
60	0.0683427	-0.654903	-0.0403194	-0.430959	0.0625422	0.0836103	0.993466	0.189779	0.152392	0.162749	0.04748	0.0787025	0.0264152	0.209915	-0.122754	0.651679	0.308025	0.0729004	0.607641	0.237108	0.439361	0.0721519	-0.105601	0.160427	-0.174521	-0.0422328	0.220366		0.153082	-0.0342217	0.0467022	-0.0552763	-0.132427	0.362079	0.431242	-0.293331	0.133798	0.1612	-0.0381781	0.136017	0.0890822	0.00613015	0.154377	0.106186	-0.0642707	-0.135601	0.35355	0.473171	0.178756
61	0.313839	0.272072	-0.172998	-0.962304	-0.193177	0.0243447	0.140894	-0.167179	0.487712	-0.302353	-0.0225507	-0.176568	0.305052	0.185957	-0.988058	-0.994661	-0.189859	0.155513	0.123042	0.163602	0.149751	-0.275939	-0.111208	-0.392672	-0.131097	-0.0760257	0.155738	-1	-0.170006	-0.567953	-0.334745	-0.222529	0.0339804	-0.591298	-0.215547	-0.282899	-0.262138	-0.13278	0.185668	0.122096	-0.0916722	-0.218794	-0.090693	0.0440517	-0.13299	-0.0894666	0.013083	-0.274071	-0.172255
62	0.295514	-0.280032	0.539728	0.473207	0.582768	0.0175002	0.0942531	0.0716837	-0.218331	0.134684	-0.0127176	0.290583	-0.131316	-0.219857	-0.988438	-0.87939	0.166351	0.23276	0.316811	0.279476	-0.22057	0.0620017	0.112345	0.451842	0.244067	0.641838	0.431294	1	-0.0742625	-0.979861	-0.247453	0.0244825	0.495548	-0.185087	0.451981	-0.474916	-0.0136973	-0.821417	-0.420627	-0.243953	0.423685	0.219967	0.212516	-0.600952	-0.6	-0.1788	-0.21914	0.445663	0.351521
63	0.0705632	0.697865	-0.954084	0.260036	-0.476985	-0.249193	0.0854444	0.888768	0.659801	-0.203172	0.438202	-0.917857	-0.272276	-0.629061	-0.843474	-0.645772	-0.469823	-0.0564574	-0.183025	0.986394	-0.784306	-0.577382	-0.501795	-0.793365	-0.547581	-0.167367	-0.415376		-0.766073	-0.65524	-0.0389473	0.204087	-0.437412	-0.755689	-0.429418	0.689655	0.0661723	-0.653412	0.590469	-0.0853044	-0.279175	0.927644	0.136637	-0.696918	0.525708	-0.946773	-0.410365	0.426352	-0.606627
64	-0.913812	-0.999129	-0.997977	-0.858008	-0.968364	0.313461	-0.077582	-0.910009	-0.616464	-0.749329	0.948215	0.356506	-0.912324	0.993731	-0.961385	0.686468	0.14796	-0.892736	-0.0157543	0.879167	-0.474183	0.833791	0.995212	-0.627009	0.167568	-0.680944	0.88148	-1	-0.766403	-0.703123	-0.0444006	-0.420964	-0.685119	-0.993396	-0.20601	0.894427	0.232162	0.263563	-0.805353	0.369973	-0.865175	-0.416744	-0.910266	-0.795432	0.171341	-0.163131	0.319531	-0.13537	-0.997366
65	0.0234311	-0.431959	-0.727589	0.81518	0.0816127	-0.291694	0.181427	0.162098	0.12583	-0.49998	-0.75974	-0.669965	0.875948	0.329076	-0.903329	-0.278344	-0.50838	0.256345	-0.126254	-0.362074	-0.754124	0.225448	-0.27933	0.969115	-0.998542	0.217178	-0.794358		-0.999984	-0.658909	-0.431882	-0.111012	-0.998507	-0.998252	0.0229297	-0.950445	-0.612013	-0.0292273	-0.36121	-0.916304	-0.704829	-0.542487	0.112379	-0.34537	0.96592	-0.278177	0.99046	-0.999829	0.291586
66	-0.265666	0.994479	0.274535	0.842379	0.0403162	-0.320343	0.26223	0.0622572	0.494817	-0.153196	0.565399	0.209057	0.901705	-0.136264	-0.995634	0.688793	0.739029	0.19357	-0.0551719	0.668965	0.441368	0.217531	0.448204	0.200565	-0.0995037	-0.413654	0.319881		-0.0282663	-0.0956246	-0.00209424	0.396701	0.241604	-0.854661	0.0255453	0.340754	0.0159342	-0.0183326	0.0417391	0.257663	-0.783638	-0.279194	0.118941	0.125626	-0.109929	-0.489959	0.0181788	-0.160174	0.24116
67	0.864083	-0.972254	-0.790957	-0.6758	-0.0936461	-0.789049	0.169486	-0.594701	0.097935	-0.971072	-0.967201	-1	0.934335	0.779213	-0.559118	-0.14558	-0.636511	0.539832	-0.480758	0.0352722	-0.144844	-0.54002	-0.790648	-0.989995	0.170252	0.529299	0.759257		0.105786	-0.659534	-0.5006	-0.140266	0.504966	0.522459	0.519947	0.155963	-0.0688021	0.854847	0.0914875	-0.55157	0.598559	-0.995755	-0.745241	-0.677145	0.44132	-0.044219	0.969493	0.999133	-0.695275
68	-0.0242545	0.41113	-0.354769	0.311479	0.208201	-0.141421	-0.0207281	0.188138	0.0494749	-0.0918169	-0.0146469	-0.0462918	-0.0227991	-0.313858	-0.253142	-0.609315	0.166816	0.441908	-0.146352	0.26149	0.11078	-0.104251	0.200863	0.107201	-0.110159	0.175791	-0.0628059		-0.0405073	-0.125857	0.166349	-0.7937	0.261249	0.429197	0.161987	-0.155277	0.123581	0.205178	0.996781	-0.140718	0.207896	0.219839	0.270767	0.330794	0.199168	-0.00533123	0.199107	0.0530652	0.153754
69	0.510816	-0.99879	0.135061	0.522642	0.528683	-0.155493	0.799244	0.0962587	-0.0822288	-0.142619	0.0791586	0.302805	0.198501	0.198486	-0.497209	-0.0647225	-0.0673846	0.265831	0.139945	-0.0722342	0.438565	0.200128	-0.131078	-0.178452	0.0938178	0.22826	-0.00857928		0.130034	0.0718141	-0.027719	0.331545	-0.10473	-0.284785	-0.0641165	0.380076	0.220372	-0.205412	-0.237699	-0.259563	0.0982006	-0.31218	-0.0148315	0.202398	-0.209957	-0.299697	0.141866	0.0353386	-0.0907889
70	-0.997199	0.0961905	-0.837712	-0.0894602	-0.0161033	-0.830625	0.65405	-0.228061	-0.621001	0.00788619	0.0187635	0.160312	-0.160251	-0.304838	-0.991886	-0.0614223	0.154041	-0.507423	-0.326167	-0.0303914	0.543834	-0.447214	-0.984428	0.83017	-0.256953	-0.296125	0.146616		-0.114439	-0.18196	-0.576463	-0.196849	0.185499	0.450875	-0.93963	-0.64222	-0.058988	0.168159	-0.107313	-0.143754	-0.386182	-0.283919	-0.387898	-0.651958	0.133709	-0.888861	0.19167	-0.370546	0.885398
71	0.0873837	0.94877	-0.347469	-0.129149	-0.162037	0.054917	0.208131	0.0184909	0.0435367	0.071247	0.067292	0.206984	-0.107894	-0.366591	-0.614819	0.533566	0.013735	0.00908022	0.369796	0.146496	0.186423	0.0584984	0.423349	0.132631	-0.0594528	-0.0270546	-0.0372469		0.111463	-0.263364	-0.330877	0.0495474	-0.406655	0.428871	0.26485	0.032823	-0.145715	-0.119241	0.484691	0.270094	0.232838	0.255185	-0.189765	-0.444102	0.241463	0.0496233	0.489608	0.310849	0.115297
72	-0.01141	-0.851205	-0.250015	0.254902	0.0634993	-0.632979	0.474434	-0.314705	-0.848982	0.0237275	-0.25367	-0.0255189	0.343926	0.680808	-0.801212	-0.192554	-0.168458	0.0378676	0.0722955	0.26963	0.941456	-0.0233066	-0.426671	0.245631	-0.032859	0.0497721	-0.193241		-0.1073	-0.303122	0.0729978	-0.458463	0.00956894	0.275272	-0.559194	0.0648876	-0.163248	-0.660628	-0.253579	0.0938178	-0.306431	0.000957854	0.753481	-0.0785608	-0.130653	-0.754164	-0.0940692	0.0583052	-0.232744
73	-0.158327	0.725046	-0.0532239	0.601757	-0.267026	-0.319757	0.16668	0.169564	0.359524	-0.907064	-0.295444	-0.00236686	0.544891	-0.621687	-0.770077	0.455161	0.0128344	-0.26844	0.111342	0.0400424	0.360504	0.401035	0.14237	0.00677491	-0.62697	0.155457	0.134513		-0.110307	-0.451202	-0.179144	-0.364194	-0.447773	-0.252697	-0.0418724	0.0225353	-0.455876	-0.385528	-0.00776508	-0.170454	-0.172672	-0.156057	-0.524097	-0.155903	0.195178	-0.0982122	-0.0951297	0.25374	-0.771223
74	-0.974391	-0.938458	-0.999731	-0.128744	0.546368	-0.427525	0.406977	-0.874157	-0.181778	-0.210374	-0.84964	-0.123312	-0.376902	-0.700932	-0.977767	-0.529389	-0.28946	0.997334	-0.0370117	0.842696	0.64168	-0.966928	-0.408174	-0.899657	0.290702	-0.500479	0.504263		0.0539753	-0.786147	-0.621882	-0.0733314	0.38176	0.965429	0.901296	-0.105854	0.8	-0.998559	-0.653302	0.590552	-0.976575	-0.978891	0.89868	-0.180367	-0.494009	-0.126772	0.237024	-0.918134	0.93511
75	0.901989	0.940262	-0.794951	0.212337	-0.174563	0.53262	0.783779	0.98576	-0.31741	-0.686279	0.819437	0.957407	-0.788276	0.507304	-0.979047	-0.773512	0.476908	-0.82127	0.96132	0.997671	0.92024	0.369516	0.110702	-0.956881	-0.989439	0.744569	0.436492		0.188583	0.376377	-0.531491	0.0292667	0.931057	0.742007	-0.930723	-0.614866	0.238525	0.170207	0.819588	0.99005	0.998972	0.538273	-0.577669	-0.14997	0.86535	0.0571704	0.455897	0.860808	-0.713564
76	0.000919963	-0.096633	-0.31693	-0.589695	-0.205681	-0.271645	0.0249922	-0.285586	0.0227628	-0.0916227	-0.0965556	-0.0213053	0.47346	0.0288111	-0.693687	-0.509662	-0.13751	-0.1733	0.0819415	-0.00768551	0.921468	-0.352538	-0.125848	-0.129412	0.230805	-0.290043	-0.15944		-0.0209861	-0.0426529	-0.323013	-0.199359	-0.0464159	0.25159	-0.0237861	0.0689994	-0.0571979	0.159815	-0.311065	-0.0958985	-0.508976	-0.287481	0.18991	-0.0210145	-0.169563	0.0651673	-0.154015	-0.342366	0.115021
77	0.0706109	0.10275	-0.151229	0.768403	0.671189	0.17472	0.163845	0.26542	0.170151	0.102869	-0.119767	0.476806	-0.00602399	-0.18794	-0.240654	0.155078	0.416823	0.15706	-0.77804	0.0740058	0.556598	0.138278	0.0738138	-0.0513223	0.0886328	0.206346	0.032913		0.146836	0.131209	0.0717881	0.0942531	-0.14367	-0.531949	-0.128474	0.063717	-0.0245971	0.0323157	-0.28555	0.0451985	-0.220229	0.297569	-0.0782154	0.0839961	-0.0916457	-0.118226	-0.0462368	0.201607	0.137861
78	0.119454	0.539054	-0.558666	-0.585884	-0.0127727	0.00310879	0.323671	-0.503729	0.860616	-0.0805455	0.211564	0.341454	-0.0703895	0.0973318	-0.923742	0.780869	0.282514	-0.0393783	0.593506	0.314303	0.580916	0.375326	0.206381	0.5452	-0.141966	0.0481369	-0.0611371		0.309333	-0.552513	-0.42563	0.131063	0.294949	0.0934356	0.824432	0.918013	0.303256	-0.716103	-0.00317459	0.406548	0.782131	-0.0258341	-0.0215777	-0.235704	0.598914	0.270037	0.196977	0.374673	-0.675412
79	0.0414581	0.990481	-0.110888	0.770488	0.0538785	-0.00211864	0.641014	0.41273	0.0880675	-0.148127	-0.154086	-0.023327	0.832275	-0.238087	-0.857417	0.131972	-0.0560095	0.161285	0.0461331	0.714005	0.796995	-0.218159	-0.0824993	0.665142	0.245098	-0.362446	0.334527		-0.105416	0.132453	0.0547307	-0.49671	0.119617	0.376154	-0.154878	0.459975	0.150497	0.240061	0.109457	-0.26785	-0.467345	-0.144407	0.300708	-0.805056	-0.389993	0.99529	0.591852	0.071247	0.752204
80	-0.133087	-0.694852	-0.269025	-0.099223	-0.299788	-0.277081	0.0385813	-0.123691	-0.214811	-0.377572	-0.180724	-0.647515	-0.693743	-0.0942119	-0.471695	-0.463526	-0.475449	-0.255201	0.806679	-0.305318	0.0404731	-0.393919	0.0454936	-0.771746	-0.413194	0.208922	0.0956554		0.113273	-0.655968	-0.45939	0.0816774	-0.180171	0.202874	-0.00881023	0.851537	-0.188548	-0.0522232	-0.0830455	-0.300737	0.0184868	-0.325301	-0.0681835	-0.137355	-0.257595	-0.262054	0.0132585	-0.150508	-0.488425
81	-0.605522	0.994255	-0.968592	-0.980151	0.121694	-0.911062	0.578657	-0.733095	-0.492748	-0.766337	-0.254493	-0.256317	0.902925	-0.829898	-0.616547	-0.249831	-0.0566101	-0.607193	0.147619	0.212668	0.215957	-0.996685	-0.066226	-0.650465	-0.342345	0.595282	-0.854697		-0.673271	-0.778198	0.270746	0.185475	0.996084	-0.996985	0.459118	0.405593	-0.397705	-0.080277	-0.167054	-0.121054	0.76761	-0.537816	-0.126964	0.193786	0.877632	-0.378212	-0.740381	-0.566809	-0.0670755
82	-0.227884	-0.795165	-0.70017	-0.356325	-0.0254155	0.19151	0.995234	0.241881	-0.22486	-0.166436	0.69381	0.00354608	0.999297	0.27933	-0.994513	0.619455	-0.580525	-0.0817444	-0.447214	0.729025	-0.525	-0.236669	0.240549	0.99959	0.250361	-0.45305	0.0927359		-0.570316	-0.0333733	0.253028	-0.414772	-0.187018	0.885084	-0.479567	-0.719731	-0.0579669	-0.169907	-0.561339	0.424841	-0.220261	0.192061	0.573462	0.288618	0.670584	0.273761	-0.560309	-0.297384	0.793663
83	-0.798795	0.9782	-0.660628	-0.511554	0.483423	0.00368322	-0.106592	-0.52966	-0.0480727	-0.464711	-0.282945	-0.22533	-0.994151	-0.941913	-0.00423725	-0.829722	0.303908	-0.106345	-0.996194	0.505621	-0.743878	0.278186	-0.999789	-0.705018	0.0621461	-0.0277121	-0.601354		-0.128045	-0.65147	-0.623525	-0.924541	0.395028	0.98533	-0.111567	-0.105407	0.495666	-0.760687	0.0581538	0.639315	0.28972	0.241399	-0.991061	0.195233	-0.604927	0.0960248	-0.491094	-0.485643	0.0171403
84	-0.613747	-0.114624	-0.635599	-0.990598	-0.96498	-0.848882	0.328521	-0.595286	-0.763814	-0.552394	-0.424239	-0.18149	0.419234	0.587901	-0.0586456	-0.469275	-0.644913	-0.468173	-0.177593	-0.970781	-0.685109	0.678637	0.0217813	0.59191	-0.32062	-0.9562	-0.855176		-0.0624667	-0.324382	-0.637643	0.458358	-0.161074	0.238997	0.021596	-0.696191	-0.761352	-0.438247	-0.279142	-0.354198	-0.773533	-0.145215	-0.243612	-0.784691	0.249793	-0.971724	-0.157396	-0.242536	0.319578
85	0.728134	-0.999981	0.577555	0.128356	0.834305	0.726044	0.787908	0.982615	0.261344	-0.0735864	0.0228948	0.557582	0.312118	0.91133	-0.0112896	0.992734	0.826227	0.995275	0.960501	0.87939	-0.582827	-0.00952338	0.161614	0.257205	-0.139228	-0.560074	0.487021		0.604195	0.280849	-0.641937	0.938168	-0.342193	-0.912924	0.970835	0.380028	0.0522363	-0.146662	-0.0154422	0.719401	0.446391	0.43511	0.464972	-0.0306202	0.772928	0.999161	0.440673	0.760871	0.167232
86	0.545456	0.950526	-0.997451	0.847447	-0.892472	-0.761539	0.688985	-0.804652	-0.879571	0.155963	-0.862056	-0.25072	0.919145	-0.960109	-0.997715	0.956742	-0.696581	0.560999	-0.933619	0.647709	-0.98957	-0.931116	-0.944497	-0.858362	0.145536	-0.0995037	0.132955		-0.946164	-0.822627	-0.438298	-0.947492	-0.686474	0.622244	-0.196116	-0.889766	0.60866	-0.949092	0.415988	-0.825307	-0.992005	0.987763	-0.604463	0.999985	0.999014	-0.143489	0.104035	0.916381	-0.157991
87	-0.36962	-0.115791	-0.516347	0.418722	0.358479	0.118561	0.222447	0.139061	0.36946	-0.119431	0.278857	0.240066	0.47593	0.138124	-0.0851596	0.0194408	0.295456	-0.0531567	0.169015	0.151357	0.192617	0.264111	0.328496	0.578844	0.356126	0.340136	0.276526		0.113056	0.201505	0.683424	0.0260668	0.145494	0.238443	0.127434	-0.274038	0.0769985	0.411895	0.355714	0.0612411	0.38568	0.0112352	-0.0422387	-0.19043	-0.165606	0.0223358	0.0124644	0.0835859	0.296716
88	-0.830221	-0.952331	-0.968803	0.538614	0.0282906	-0.986706	-0.130688	-0.0747899	-0.905066	-0.703395	-0.345357	0.757344	0.855025	-0.9221	-0.73727	-0.934317	-0.996241	0.959605	-0.131997	-0.996507	0.996836	-0.455671	-0.980233	-0.993979	-0.171929	-0.562578	0.0169467		-0.967823	0.964178	-0.997723	0.258306	0.760481	0.961643	-0.123465	0.907959	0.96728	0.934104	-0.565399	-0.850371	-0.0285598	0.85638	0.429127	-0.0151498	-0.572274	-0.286176	0.735169	0.655687	-0.538035
89	0.202715	0.690137	-0.513095	-0.339085	-0.238192	0.237216	0.924867	0.139071	0.441098	0.305219	0.293909	-0.135423	-0.384272	0.482151	-0.250916	-0.632556	0.282318	0.040531	-0.0617481	0.135276	0.257329	-0.00775171	-0.0696699	0.512236	0.727874	0.0234228	-0.0157747		0.0707897	0.0103206	0.195451	0.0347616	0.245692	0.264377	-0.17788	-0.260756	-0.102695	0.052609	0.276007	0.427907	0.248763	0.107005	0.384296	0.383349	0.0875649	0.0422159	0.0861564	-0.113673	0.0175886
90	-0.0145175	0.080712	-0.741689	0.98946	0.0784095	0.326033	0.0439239	0.0255916	0.174582	0.308177	-0.272081	-0.278991	-0.386953	-0.691987	-0.619823	-0.807349	-0.0371589	-0.00381677	0.188847	0.280269	0.44178	0.0604082	0.0721587	-0.0938251	0.154988	0.0259442	-0.547397		-0.116999	0.390293	-0.783939	-0.89914	-0.38203	0.0580135	-0.349312	-0.587697	0.316228	0.0177678	-0.19877	-0.0383856	-0.321879	-0.303125	-0.369721	-0.30209	-0.34042	-0.0483095	-0.101638	0.0387306	0.49189
91	-0.372103	-0.995037	0.863637	0.957278	0.156819	-0.0772175	0.199008	-0.160956	-0.625074	-0.99763	0.762377	-0.841912	0.855293	0.755277	0.962234	-0.487543	-0.137673	0.124427	-0.0914032	0.111689	0.574373	-0.33441	0.0344623	-0.821899	-0.559767	-0.365841	0.887816		0.226808	-0.988936	-0.291268	0.071247	-0.951479	-0.234284	0.998539	-0.981588	-0.164399	0.253291	-0.968032	-0.466209	0.991283	0.263662	0.555408	-0.972136	0.999944	0.101877	0.710724	0.00696847	-0.860358
92	-0.144186	0.619882	-0.44869	-0.514765	0.0798476	-0.00154321	0.956417	-0.330671	-0.396988	-0.309468	-0.70616	-0.142784	-0.257663	-0.27135	0.243157	-0.485145	-0.29176	0.0246231	0.263309	0.321039	-0.0588178	-0.556186	0.153883	0.597211	0.00324674	0.0814652	-0.964895		-0.122211	-0.291081	-0.24971	0.44909	-0.162232	-0.102974	-0.78444	0.291109	-0.213514	-0.462879	-0.267803	-0.0995037	-0.753869	-0.940266	-0.348419	0.387658	0.219267	-0.744134	0.204733	0.0581294	-0.628171
93	0.195571	0.300951	-0.242536	-0.0189508	-0.0277946	0.094863	0.310135	0.0514224	0.885488	0.353084	0.0188291	0.0515075	0.542957	-0.386212	-0.0719932	0.419551	0.294611	-0.327543	-0.111489	0.101192	0.0097319	-0.641072	-0.144799	-0.608579	0.231969	0.110661	0.21819		0.48995	0.262677	-0.384615	0.0905357	0.180588	0.503974	0.125258	-0.108231	-0.222654	0.0383805	0.28414	-0.637441	0.556314	0.0186883	-0.103442	-0.144164	0.210579	0.124551	0.0909563	0.029358	0.454438
94	-0.28568	0.996834	-0.980481	-0.0264841	0.249878	0.878671	0.57133	0.162931	0.00787377	-0.814475	0.178885	-0.709406	0.999004	-0.489191	-0.290525	-0.567113	-0.553842	-0.593542	-0.0433244	-0.311177	0.119508	0.965739	0.92441	-0.8	0.257023	-0.084963	0.663209		-0.963414	-0.157155	-0.715474	-0.672777	0.740536	-0.610976	-0.972362	-0.752577	-0.236744	-0.179189	-0.164399	-0.927644	0.195044	0.838444	0.865155	0.870326	0.763599	0.935502	0.138772	0.811234	-0.477698
95	0.630343	0.432699	-0.628913	0.989395	0.837086	0.110432	0.834066	0.585384	0.161442	0.978181	-0.615644	-0.238525	-0.686013	-0.834377	-0.774865	-0.834958	0.563337	0.901385	-0.525022	0.203515	0.594164	-0.782125	-0.865664	0.98652	0.395773	0.533399	-0.959933		0.849199	0.222155	0.0720665	-0.98695	0.931954	-0.322823	0.999294	0.376377	0.258394	-0.123088	-0.835618	0.880873	-0.998274	0.576592	-0.55833	-0.181951	-0.974528	0.201653	-0.312988	0.0842069	0.66389
96	0.659534	0.646873	-0.895941	-0.987372	0.143244	0.178304	0.760298	-0.369089	0.0942119	0.993263	-0.536875	0.558376	0.997725	0.91029	-0.836286	0.674211	0.143244	0.0680239	-0.204583	0.53629	0.28447	0.939265	0.697553	0.335412	0.0757653	0.210758	-0.914429		0.51611	-0.253087	-0.868891	0.182908	-0.729156	-0.784883	0.911168	0.911454	0.284088	-0.208108	0.0830455	-0.0202661	0.89254	0.760834	0.25938	0.837961	0.988736	0.996445	0.651422	-0.555572	0.879735
97	-0.894427	0.930484	-0.910233	-0.310488	-0.994926	-0.384966	0.495521	-0.773957	0.610508	-0.0119991	0.985695	-0.99937	0.766396	-0.997404	-0.862673	0.72633	-0.0679057	-0.562607	0.253786	-0.0921982	0.866449	0.679074	-0.989203	-0.807731	0.103606	-0.426829	-0.542487		-0.504346	-0.745537	-0.998977	-0.276547	-0.970143	-0.807739	0.89379	0.933148	-0.98898	-0.841505	-0.934488	-0.999975	0.457253	-0.49773	0.947922	-0.551142	0.664364	-0.0984036	-0.85001	0	-0.988775
98	0.619045	0.984721	0.287887	0.121223	0.760528	0.75622	0.965403	0.917366	0.825217	0.506493	-0.0509541	0.104788	0.968509	0.996283	0.618437	-0.276422	0.553249	0.34	0.625906	0.609636	0.836086	0.298473	0.423137	0.957024	-0.0131815	0.563568	0.481837		0.99558	-0.0235923	0.594843	0.61341	0.275978	-0.903229	0.833853	0.446303	0.625017	-0.283731	0.803928	0.880088	-0.949092	0.956607	0.19989	-0.107408	0.999983	0.967013	0.407903	0.960945	0.0968001
99	-0.617725	0.750366	-0.756054	-0.085263	-0.308454	-0.0398725	0.0702486	-0.348187	-0.995946	-0.391719	-0.500278	-0.42144	-0.862354	-0.457322	-0.408288	-0.0979964	-0.0668604	-0.316807	-0.309738	-0.796356	-0.0473606	-0.382858	-0.101469	0.0375763	-0.297282	-0.291495	-0.212962		-0.337461	-0.315286	-0.675887	-0.437615	-0.00468379	-0.634098	-0.422715	0.852395	0.0523046	-0.400443	-0.162386	-0.422206	-0.675013	-0.438648	0.188126	0.202829	0.0732403	-0.0614442	-0.119091	0.00118343	0.280449
100	0.974819	0.998069	-0.104267	0.690124	0.851658	0.856352	-0.043048	0.416575	0.297067	0.997839	-0.776756	0.589924	0.92177	0.46447	0.929514	-0.370308	0.96241	-0.680451	-0.192311	0.455181	0.967469	-0.393919	-0.165228	0.980744	0.583519	0.00607892	0.945687		0.978147	0.714876	-0.494363	0.165357	0.339839	0.956742	0.20103	0.992951	0.997459	0.935197	-0.83205	0.945715	0.970304	0.8761	0.207698	0.479567	0.964205	0.848141	0.976187	0.9997	-0.754035
101	-0.344632	-0.902036	-0.581718	-0.736818	-0.347538	-0.541826	-0.909065	-0.175599	-0.927299	-0.543808	-0.127252	-0.5547	0.805912	-0.818798	0.840459	-0.737096	-0.996254	-0.510448	-0.45109	-0.0458599	-0.623905	-0.553483	-0.146981	0.371391	-0.356293	-0.0597887	-0.32133		-0.521629	-0.295655	-0.631066	0.141827	-0.0856219	-0.57005	-0.620964	-0.550471	-0.259682	-0.432329	-0.481728	-0.249099	-0.351123	-0.716085	-0.288958	-0.0893019	0.205532	-0.266756	-0.115194	-0.518062	-0.430358
102	-0.608332	0.884271	0.211593	0.691336	0.554214	-0.238565	-0.142187	-0.222155	0.949387	0.294962	0.952525	0.904485	0.970857	0.230607	0.38865	-0.586019	-0.144307	0.432246	0.129508	0.125482	0.573462	0.872102	0.06069	-0.993697	0.265156	0.268965	-0.625988		0.236956	-0.111968	-0.99993	0.423529	0.589118	0.878448	0.621012	-0.30404	0.824401	-0.275495	1	-0.859356	-0.494658	0.58279	0.219095	-0.0372461	-0.247213	0.691811	-0.184987	-0.991117	-0.0746213
103	-0.621736	0.956261	-0.40524	-0.234767	-0.787792	0.47704	0.237453	-0.505856	0.0165462	0.0757694	-0.260958	-0.42779	0.340441	0.238649	0.413326	-0.43535	0.583299	-0.402739	-0.676331	0.0854422	0.840628	-0.103	0.367228	0.882956	-0.225572	-0.0618579	-0.058722		0.203954	-0.0583334	-0.491922	-0.382048	0.411108	0.750519	-0.231719	0.647855	0.372569	0.0857223	0.00752802	-0.0847998	0.428653	0.589128	0.88395	-0.875355	0.176331	-0.0148682	-0.0680679	0.633408	0.548768
104	-0.0252244	0.120909	0.0687607	0.311317	0.147082	-0.0436646	-0.0851534	0.00572073	0.0694521	0.0503887	-0.158517	-0.312787	0.149344	-0.150915	0.496609	0.100668	-0.174305	0.212225	-0.154246	-0.0892068	-0.169688	0.304776	-0.152239	-0.411041	-0.154595	0.043398	-0.334537		-0.0954253	-0.0305534	0.391323	0.191768	0.134459	0.482518	-0.0832221	-0.423119	0.11622	0.197587	-0.00428813	-0.00441497	-0.12139	0.169819	-0.62313	-0.333034	0.124135	0.115678	-0.302269	-0.00880054	-0.00197044
105	0.118213	0.835797	-0.0883422	0.997542	-0.0163912	0.455729	0.940865	0.432662	-0.99629	-0.118334	0.29934	-0.0420104	-0.420033	-0.304713	0.219543	0.911987	0.717615	-0.143429	-0.0710202	0.364399	0.619877	0.0657759	0.0562313	0.746404	0.277469	0.203415	-0.0895267		0.202652	-0.101457	-0.726896	0.262047	-0.413604	-0.165634	0.258222	0.540232	0.15216	-0.204499	0.517116	0.422206	0.652485	0.13934	0.880137	0.207987	0.49396	0.0375674	0.00627603	0.452376	0.025252
106	0.283105	0.457069	-0.76381	0.99945	-0.364829	-0.621395	0.982976	0.729777	0.144972	-0.695795	-0.621297	-0.987073	0.986946	-0.334765	0.712076	0.867253	-0.992543	0.774463	0.864381	0.171464	0.355573	-0.938632	0.194676	-0.971724	-0.425797	-0.77416	0.481416		0.259129	-0.639118	0.999103	0.639071	0.337605	-0.89688	0.785067	0.48383	0.451198	0.0787025	-0.272414	0.392098	-0.997116	-0.0658942	-0.933857	0.748347	0.846949	0.301892	-0.70975	0.797406	-0.647231
107	-0.0602353	0.728108	-0.390412	0.140549	-0.191395	-0.0630323	-0.254995	0.0774042	-0.120841	-0.241651	-0.18372	-0.289971	0.361729	-0.24774	0.215368	0.379435	0.197861	-0.0670844	-0.126109	0.160676	-0.325182	-0.142231	0.0347616	-0.131227	-0.152301	0.999601	-0.0333448		0.039931	-0.118837	-0.662269	-0.113192	0.182634	-0.646816	0.0107356	0.154531	-0.312057	-0.00651452	0.404897	0.0494888	0.0830455	-0.00561789	0.0457149	-0.231449	-0.0711796	0.00591706	-0.192833	-0.597688	-0.200992
108	0.0194949	0.563594	-0.078615	0.598376	-0.0418353	0.0431165	-0.0700454	-0.308755	-0.155963	-0.312751	0.220877	-0.339338	-0.229608	0.322138	0.611052	0.860959	-0.108727	0.432595	-0.566983	-0.174959	-0.998209	-0.252869	-0.158897	-0.661244	0.228244	-0.15946	-0.594627		-0.0357447	-0.293245	-0.145325	-0.999981	-0.151418	-0.731827	-0.448982	-0.393919	-0.478852	-0.590358	-0.591097	0.538637	0.0792552	-0.0868795	0.128945	0.0150359	0.157181	0.10553	-0.128165	-0.012383	0.35221
109	-0.167323	0.637549	0.162145	0.0814471	0.034665	-0.123375	-0.361246	0.265425	0.224957	0.04955	0.237001	-0.234032	0.455438	-0.16762	0.290259	0.197048	-0.0166182	0.142425	0.367476	0.20584	-0.573259	-0.327022	0.0879263	-0.249041	-0.115689	-0.0128012	-0.124158		0.00620555	-0.0698863	-0.292003	0.608375	-0.110008	-0.272867	0.0549124	0.124399	0.0875947	0.226746	-0.231621	-0.296202	0.0319686	0.186979	-0.189352	0.144307	-0.00487799	0.141549	-0.0620047	0.204116	-0.0156419
110	-0.380141	0.741536	-0.333284	-0.311271	-0.171825	0.198452	0.426619	-0.448709	-0.158177	0.0867925	-0.130405	-0.0976177	0.766814	0.219038	-0.270474	0.804531	0.063115	-0.297298	-0.661396	0.110042	-0.975403	0.445033	0.0221552	0.664966	-0.418349	-0.483563	-0.192745		-0.0424584	-0.306799	-0.272936	-0.450576	-0.269196	0.46235	0.0831729	0.128554	-0.219886	-0.340866	0.00722003	0.738914	0.657485	0.0744594	-0.00429181	-0.169673	0.422885	-0.553471	-0.341286	-0.0351277	0.0294903
111	0.242536	-0.793459	-0.406138	0.988993	-0.258736	-0.203669	-0.879707	-0.129211	-0.138329	-0.278545	-0.587979	-0.657369	-0.6	-0.399297	-0.182712	-0.109364	-0.452987	0.287629	0.194944	-0.072409	-0.747267	-0.424387	-0.0434372	0.861408	0.0822888	0.192546	-0.106953		0.463851	-0.12313	0.0316464	-0.38536	-0.191374	0.335308	0.185677	0.038016	-0.102521	-0.184079	0.0374377	-0.113063	-0.637612	-0.0830455	0.788502	-0.736931	0.572799	-0.088029	-0.311753	-0.183087	0.276547
112	0.837611	0.901829	-0.782198	0.830786	-0.42249	-0.183209	0.259973	0.263976	0.0996198	0.50532	0.783708	0.526585	0.604269	-0.58007	0.955459	0.601749	0.491838	-0.220405	-0.140266	0.525047	-0.999677	0.265498	0.26615	-0.999938	-0.147539	-0.110932	0.302629		0.456954	-0.995984	-0.998393	0.725338	-0.0548623	-0.615554	0.0491602	0.175897	-0.0109482	-0.984271	0.973331	-0.811404	-0.692345	-0.939436	0.882353	0.884918	0.842716	0.0364925	0.65589	0.553009	0.310461
113	-0.229351	-0.265076	-0.705301	-0.174909	0.972082	0.942064	0.516493	-0.494954	-0.929578	-0.77019	0.644793	-0.857493	-0.267644	-0.965094	0.731527	-0.605813	0.512458	0.395829	-0.158923	-0.906536	-0.999083	-0.291162	-0.366843	0.977582	-0.241099	-0.861631	-0.98758		-0.364399	0.100533	-0.711725	-0.970552	0.147492	-0.96004	-0.638659	0.526916	0.782957	0	0.427453	0.328012	0.182089	0.221621	0.294861	-0.935811	0.296099	-0.071247	0.253569	0.977802	0.697149
114	0.0620691	0.915154	-0.784559	-0.653954	-0.384465	0.482179	-0.945253	-0.302961	-0.0604362	-0.159232	0.894427	-0.287348	-0.136218	-0.999269	0.846758	-0.145066	-0.707107	0.201049	-0.285082	-0.0035587	-0.608936	-0.848846	-0.985922	-0.9442	-0.911758	0.353984	0.924857		-0.214407	-0.467888	-0.837363	-0.805882	0.970143	-0.995157	0.323591	0.301934	-0.539054	-0.918592	-0.227386	-0.880893	-0.673222	-0.764775	0.72078	-0.384615	-0.0954919	0.781372	0.605405	0.75391	-0.155734
115	0.328812	-0.454997	-0.377014	0.530188	0.409319	-0.269291	0.924747	-0.143751	0.51568	0.202188	0.410365	0.388219	0.929773	-0.194466	0.909398	-0.403679	0.222038	0.449045	0.881718	0.410284	0.73365	0.192588	0.496541	0.104374	-0.0108395	-0.188901	-0.759257		-0.273322	-0.246571	0.263577	0.333551	0.391555	0.630322	0.791782	0.509301	0.670361	0.0947247	0.159721	0.16572	0.335919	0.194703	-0.321415	0.366615	-0.195074	0.252091	0.191681	-0.420627	0.120623
116	0.169144	0.869113	-0.994461	0.960641	-0.109984	0.896806	-0.18287	0.266616	-0.347359	0.514926	0.677141	0.00576359	0.240414	0.0811271	-0.692225	0.0270172	-0.0426657	-0.530318	0.521087	0.196116	-0.447993	-0.38627	-0.708314	0.111245	0.115657	-0.15448	-0.302955		-0.16907	-0.00996628	-0.690904	0.690669	-0.288907	0.430305	-0.0643505	0.059694	-0.183346	-0.202978	-0.923539	0.118898	0.844535	-0.595064	-0.30923	-0.0923395	-0.329557	0.120331	0.363345	0.509321	-0.709655
117	-0.252129	-0.990762	-0.796802	0.54314	-0.0201109	0.367977	-0.16266	-0.614358	-0.430634	-0.43066	-0.511151	0.0893423	-0.253233	-0.364692	0.18135	0.626759	0.0149237	-0.471594	-0.0680831	-0.292667	-0.171939	-0.233185	0.059448	-0.859738	-0.180473	-0.340225	-0.547249		-0.0387306	-0.849338	0.28287	0.100368	-0.736653	-0.97386	-0.40364	0.811455	0.14035	0.763386	0.894427	0.238894	-0.643659	0.771331	-0.888525	-0.500444	-0.720238	-0.733694	-0.871957	0.187032	0.660115
118	0.0588522	0.522252	-0.398418	0.78976	-0.223593	-0.906446	-0.333812	0.346337	-0.219168	-0.0952678	-0.0117332	0.208201	0.357019	-0.202442	-0.351906	-0.36783	-0.161132	-0.314614	-0.396812	0.00782449	0.610124	0.0912672	0.288862	-0.586312	0.117053	-0.163959	0.272279		-0.0713446	0.0202857	-0.613133	-0.902285	0.407042	-0.558403	-0.474637	-0.673935	-0.202092	0.0604641	-0.254161	-0.48851	0.173615	-0.32695	0.188847	0.0479295	0.0866296	-0.434573	-0.0457149	-0.164399	0.190445
119	0.996325	-0.859716	-0.849441	0.875242	-0.858139	-0.283497	-0.256333	-0.939793	0.293385	0.556508	-0.899814	-0.458176	-0.968935	0.19996	0.778754	-0.922862	-0.0703382	-0.447214	-0.991228	0.990758	0.783498	-0.974509	0.995683	0.99619	-0.938054	-0.387415	0.944631		0.971136	-0.905419	-0.951709	0.846583	-0.850158	0.808034	-0.351287	-0.0706386	-0.889911	0.128915	0.543251	0.313887	-0.503654	0.65882	-0.486241	-0.611637	0.925901	-0.368245	0.431758	-0.512065	-0.974786
120	0.482605	0.915054	-0.759032	0.16668	0.436795	0.814232	0.274232	0.303204	-0.389902	-0.383124	0.516665	0.169702	-0.032977	-0.509893	0.762674	0.502509	-0.0729756	0.31765	-0.747534	0.227261	0.336336	0.17795	-0.726363	-0.005865	0.334346	0.476624	0.546484		0.329076	-0.115171	-0.920331	-0.235362	0.224495	-0.402649	0.943758	0.601092	-0.11429	-0.65909	0.401822	-0.0808159	-0.192444	0.0507819	0.701479	0.466183	0.544191	0.182089	0.018447	0.141421	0.359984
121	0.537571	0.196116	0.451265	0.0554033	0.549952	0.961407	0.551592	0.183387	-0.0863276	0.279803	0.840925	0.074505	0.997389	0.593968	0.977309	0.122889	0.450046	-0.280087	0.967529	0.630673	0.715926	-0.148978	-0.0941742	-0.913463	-0.438605	0.949298	0.0832831		0.0281578	-0.23299	-0.924286	0.245747	0.313307	-0.582821	-0.520486	0.769758	-0.55769	0.287196	-0.00791532	-0.0222167	0.817468	0.208691	-0.168539	0.16104	-0.45902	0.553483	-0.0365609	0.168557	-0.140664
122	0.458144	0.920266	0.338142	0.773309	0.529223	0.733329	0.424999	0.547249	0.788544	-0.213286	0.506104	0.455351	-0.234892	0.821631	0.46616	-0.687986	0.272735	-0.0348994	-0.375382	0.897789	0.955837	0.999747	0.584847	0.005338	-0.331185	0.214441	-0.399197		0.426267	0.221621	-0.29966	0.519607	0.82481	-0.545086	0.257977	0.588316	0.192414	0.577641	0.389562	0.465237	0.44593	0.662275	0.00395254	0.464103	0.731489	-0.256901	0.0717702	0.988194	0.900079
123	0.161775	-0.216633	-0.823616	0.97555	-0.237869	-0.627679	-0.155519	0.0954176	-0.964585	-0.226073	-0.729156	0.075762	0.610755	-0.999515	0.681374	0.339739	-0.0299367	-0.275304	0.277899	-0.996685	0.624131	-0.954118	-0.304296	-0.648404	0.0830455	-0.710084	-0.652566		-0.180185	-0.974936	-0.687413	-0.489324	-0.870563	-0.974723	-0.990866	0.264029	0.410853	-0.412508	0.927898	-0.176715	0.755575	-0.579714	-0.0632875	-0.990747	-0.802797	0.0958951	-0.860577	-0.998269	-0.707107
124	-0.0185153	-0.999999	-0.913734	-0.726585	-0.201346	-0.0117837	-0.161407	-0.0944314	-0.0435579	-0.120565	-0.108392	-0.120331	-0.318155	-0.178461	0.917777	0.257178	-0.80618	-0.916157	0.784883	0.203598	0.0105479	0.0192272	-0.585662	0.808236	-0.675158	-0.331428	-0.163159		0.0187937	-0.196116	-0.924717	-0.598739	-0.707107	-0.293647	0.0879855	0.119915	-0.782986	-0.500717	-0.660287	-0.183209	-0.480367	-0.277389	-0.0885398	-0.187491	-0.299148	-0.295852	-0.644472	0.471553	0.393115
125	0.440157	0.957287	0.378499	-0.213655	-0.61497	0.377297	-0.962281	-0.619155	-0.505403	-0.0504771	-0.31306	0.364399	0.97205	-0.103652	0.965576	-0.118004	0.406719	-0.598193	0.6903	-0.0396513	0.416877	0.977124	0.364792	0.731394	0.969264	0.448672	0.141669		0.158773	0.193256	-0.0543988	-0.274181	0.443684	0.371784	0.349398	0.488501	-0.923364	0.321582	0.534276	-0.991474	0.58646	-0.347116	0.207504	0.0539753	0.487523	0.608819	0.118833	0.820398	-0.198641
126	0.293034	0.487536	-0.590979	-0.376313	0.0851815	-0.734985	0.939586	0.0267591	0.201676	-0.691716	-0.525822	-0.573976	-0.477831	0.422734	0.994443	0.791497	-0.313997	0.455229	0.448417	0.914515	0.274146	-0.410365	0.170183	-0.762141	-0.954332	-0.233267	0.742614		-0.12758	-0.468824	0.179517	0.158876	-0.607226	0.766208	-0.141853	0.200723	0.526673	0.536233	-0.00544951	-0.886512	-0.817558	0.164014	0.559335	-0.220521	-0.923742	0.297249	-0.269757	0.633619	-0.0805455
127	0.402967	-0.838402	-0.977333	0.255893	-0.175725	0.989755	-0.951743	-0.626557	-0.215796	-0.956264	0.654931	-0.21243	0.667012	-0.444174	0.968817	-0.891193	-0.11511	-0.777245	0.26021	0.344636	0.0409912	0.0954526	-0.236502	0.977752	-0.272282	-0.444039	-0.343274		0.760231	-0.27933	-0.85674	0.92125	0.496139	-0.997979	0.605634	-0.874157	0.835885	0.182734	0.278159	0.991377	-0.999222	-0.645052	0	-0.170207	0.039968	0.600907	0.400819	-0.763296	0.357298
128	-0.759962	-0.883538	-0.115816	-0.0145088	0.976187	-0.36107	0.168296	-0.15284	0.0647605	-0.396091	0.289177	-0.0881511	-0.953605	-0.0913735	0.883808	0.555733	-0.959189	-0.0301282	0.572302	0.19389	-0.418668	-0.685872	-0.0967046	-0.620369	-0.27146	0.0552725	-0.602188		-0.332953	-0.972511	-0.678701	0.0735951	-0.0565133	0.905175	-0.466759	0.256475	-0.435611	-0.542406	0.996983	-0.311935	0.711291	-0.184965	-0.525182	-0.707107	0.822846	0.280618	-0.355745	0.483077	0.0923867
129	0.356842	0.999305	-0.153015	-0.59876	0.235839	0.43307	0.269846	-0.01331	-0.0942083	0.266939	0.266509	0.196116	0.825964	0.149363	0.687899	-0.196977	0.0828408	0.13338	0.0104942	0.133058	0.518077	0.1178	0.285832	0.495883	0.383194	0.235578	0.162462		0.192657	-0.141684	-0.0826546	-0.0214773	0.351819	-0.0320936	0.286987	-0.308839	-0.19182	0.0431696	0.0392418	0.190133	0.23612	-0.156878	-0.135	-0.0408286	0.152419	0.244242	0.149911	-0.0480053	0.206943
130	-0.664025	-0.913051	-0.838444	-0.849253	-0.00265251	0.95224	-0.207335	-0.261019	-0.11446	0.227816	-0.315089	0.168964	-0.394998	-0.00548438	-0.271052	-0.284278	-0.0120635	0.305046	0.512498	0.127637	-0.340177	0.17999	-0.0737536	0.152688	-0.152057	-0.99605	0.552674		-0.346081	-0.998016	-0.849106	-0.325656	-0.470914	-0.563587	0.231807	-0.415215	0.208941	-0.729073	0.999993	-0.339107	-0.634278	0.126367	0.329125	0.0925545	0.411397	0.344604	0.148548	-0.470588	-0.0812415
131	0.486775	0.734272	0.696395	-0.600177	-0.770322	0.945451	0.855126	0.677476	0.159546	0.427525	0.804869	0.928477	0.873542	0.973583	0.300157	0.847283	0.143895	0.988823	-0.529263	0.770254	0.618872	0.929445	0.364197	-0.0293991	0.45457	0.539509	0.855126		0.998386	0.109942	-0.854199	0.152214	0.342282	0.574094	0.971033	0.300286	0.967661	0.215015	0.904775	0.415891	0.918484	0.920832	0.095958	0.621395	0.665816	0.997981	0.827426	0.0638231	0.695722
132	0.697553	-0.985821	-0.851608	-0.916686	0.392971	-0.377056	0.0693394	-0.3872	0.582908	0.952029	-0.489293	0.299921	-0.873947	-0.962726	0.200824	0.631673	0.272322	-0.314775	-0.94891	-0.313728	-0.20239	-0.769621	-0.996524	-0.356659	-0.65403	-0.529999	-0.925793		-0.408617	-0.971754	-0.0756836	-0.532054	-0.736943	-0.991961	-0.818132	-0.144729	0.455407	-0.942859	0.456506	-0.462566	-0.851136	-0.340649	0.198327	-0.646522	0.925305	0.260382	-0.93582	-0.0440102	-0.322763
133	0.704382	-0.930819	0.277801	-0.98356	0.161233	0.514028	-0.677275	0.407587	-0.196394	-0.129433	-0.414766	0.112353	0.0931053	-0.120143	0.788709	-0.778456	-0.159844	0.45447	-0.923564	0.635011	0.0386266	0.365348	0.686102	0.0103087	-0.104774	0.99938	0.326571		0.509703	-0.980581	-0.495093	0.111167	-0.00945904	0.578931	0.153479	0.00863899	-0.0536417	-0.959611	0.980155	-0.175135	-0.2104	-0.692532	0.229517	-0.0179612	0.141161	0.504568	0.466641	0.590574	0.407303
134	-0.721682	0.94663	-0.909185	-0.990451	-0.340704	-0.244988	0.543895	-0.597639	0.083304	-0.811343	-0.821588	-0.546435	0.0511276	-0.917345	0.280167	-0.787371	-0.897832	-0.968029	-0.458237	-0.331221	-0.830531	-0.567035	-0.913415	0.563867	-0.228869	-0.821736	-0.8772		-0.290259	-0.502774	-0.593294	-0.204826	-0.742461	0.719097	-0.176967	-0.797768	-0.495446	0.355705	-0.777086	-0.902861	0.234259	-0.581531	-0.269528	0.0327693	-0.998673	-0.19951	-0.691628	-0.882097	-0.682202
135	0.37619	-0.856703	-0.735407	-0.84732	-0.660686	-0.101084	-0.528466	0.381625	-0.716639	-0.997397	0.178885	-0.887018	-0.998235	0.689497	-0.638755	-0.99907	-0.892635	0.60232	0.0455109	0.191211	-0.123439	0.494398	-0.447775	0.182712	-0.578597	-0.518727	-0.465432		-0.723208	-0.998955	0.234641	0.263934	-0.291963	-0.751901	-0.948296	-0.445532	-0.783498	0.980068	0.708636	-0.515157	-0.893131	-0.594659	-0.324363	-0.886682	0.643549	0.086134	-0.740987	-0.920853	-0.339471
136	-0.337153	0.550356	-0.328771	-0.994269	0.500188	-0.260561	0.160886	-0.624695	-0.0856913	0.229562	0.240328	0.378058	0.664845	-0.283321	-0.0768472	0.480112	-0.0960595	0.135915	-0.654855	0.0471174	-0.124239	-0.152475	0.0396272	-0.718302	-0.60981	-0.078122	-0.385203		-0.352015	-0.56311	0.289144	-0.421644	0.278243	0.491466	0.325151	0.175341	-0.0788716	-0.382156	-0.00972717	-0.14957	0.93368	-0.278976	-0.436274	0.252673	0.0414317	-0.788316	-0.99943	-0.621783	-0.220943
137	0.360076	-0.510333	-0.369552	-0.917722	-0.00457661	-0.30782	0.543148	0.267819	0.237104	0.00130208	0.0326848	0.00605133	0.266972	0.210115	0.111682	0.921323	-0.0310195	-0.167415	-0.179959	0.332416	-0.1268	0.323195	-0.087711	-0.431368	0.891443	0.176664	0.0300518		0.198967	0.315674	-0.253953	0.326926	-0.0915824	0.213049	0.838656	-0.0809064	-0.0180383	0.120239	-0.0401686	-0.299587	-0.466563	0.782015	0.536354	-0.63164	0.5801	0.36406	0.171968	0.599741	-0.00122699
138	0.121891	0.112489	0.303636	-0.556294	0.476682	0.9948	0.168875	-0.125821	0.0724421	0.365252	0.641194	0.644682	0.604269	0.224109	0.537005	-0.883877	0.285153	0.155196	-0.133815	0.203011	0.387567	0.370521	0.471835	0.571442	0.00320511	-0.0235229	-0.0781602		0.0374444	0.361726	0.320574	-0.315475	-0.186903	-0.564364	-0.0894361	-0.0943725	0.266322	0.213489	0.905384	0.258446	0.0584107	0.400564	-0.325037	0.599653	0.469775	0.0851442	-0.240348	0.469956	0.686369
139	0.563962	0.978181	-0.207264	-0.769003	-0.475684	-0.315744	0.0716715	-0.884508	-0.20735	-0.888108	-0.0136351	-0.359169	-0.553925	-0.885979	-0.612873	0.325578	-0.0356915	-0.723794	-0.603108	0.760374	-0.78104	-0.267357	-0.854462	-0.604617	-0.0953862	0.361344	-0.338199		0.782601	0.140973	-0.831573	-0.82753	0.144617	0.904703	0.229121	0.206648	-0.942535	-0.181261	0.850566	-0.994069	-0.539607	-0.46586	0.654187	-0.998114	0.178139	-0.816024	-0.995809	-0.462903	0.5022
140	0.10175	-0.580688	-0.19212	-0.0157166	-0.050176	0.256808	0.0429052	0.097907	0.154998	0.177912	-0.0544645	0.0962677	-0.240255	0	0.325667	-0.189793	0.270393	-0.0704322	-0.140223	0.0275125	0.139367	0.254804	-0.0378108	0.349479	0.175902	-0.0102599	0.0128077		0.146614	-0.211243	-0.0248036	-0.655169	0.0608515	0.154814	-0.184341	0.413377	0.0107521	-0.0950403	0.15572	0.151488	-0.05177	0.0284064	-0.242904	0.139457	-0.0428056	0.150533	-0.110888	0.0689842	-0.0155239
141	0.0856711	0.631064	0.336336	-0.434167	0.993999	0.880867	-0.959089	0.848897	0.337632	-0.996832	-0.734803	-0.506869	0.679095	-0.952578	0.999026	0.807391	-0.935509	0.989315	0.305046	0.878484	-0.267644	0.631046	-0.0963242	0.999881	0.498964	-0.0611502	-0.390149		0.943858	-0.0205718	-0.997743	-0.83442	-0.919881	-0.865168	-0.935413	-0.587811	0.521002	-0.90849	0.587228	-0.92894	-0.56206	0.377897	-0.071247	0.737154	0.983313	-0.0469281	0.828376	-0.159546	-0.836286
142	-0.159024	0.752456	-0.33548	-0.232202	-0.182479	-0.0137782	0.0113522	-0.100771	-0.179638	0.058539	0.173336	0.0062734	0.416424	-0.0848541	-0.0483461	-0.0924407	-0.171815	-0.106751	0.429708	0.301131	-0.275112	-0.332044	-0.312461	-0.043398	-0.142028	-0.0833235	-0.262421		0.0539038	-0.318258	-0.0901594	-0.395892	-0.215108	0.305067	-0.0324204	-0.0881611	0.00396822	-0.215807	0.258041	0.00692624	-0.234517	-0.00378498	0.082763	0.865261	0.209432	-0.220993	0.0176963	-0.0418537	0.183867
143	-0.259973	0.82312	0.0619157	-0.79144	0.581238	0.834276	0.918027	0.0439575	-0.0300616	0.664364	0.144416	0.868243	-0.119508	-0.0425843	0.477513	-0.104685	0.949591	0.505179	0.0704235	0.755389	0.21541	0.981969	0.460398	-0.864995	0.12209	-0.999909	0.374926		0.489033	-0.236461	-0.774999	-0.501651	0.129438	-0.785513	0.995078	-0.723145	0.264494	-0.282713	0.403043	0.117425	0.9675	0.253215	-0.576411	0.774484	0.0164722	0.255743	0.925	0.413208	0.993263
144	0.347981	0.299732	-0.306806	-0.964158	-0.391398	-0.204538	-0.209037	-0.5753	0.988936	0.129339	0.362446	-0.199552	-0.871034	0.715926	0.893816	-0.852282	-0.155713	-0.687793	0.0827195	-0.269704	-0.40364	0.297796	-0.327299	-0.918688	0.951571	-0.116291	-0.714316		-0.41576	-0.889752	0.103679	0.0486256	-0.284751	0.955779	0.465746	-0.97334	-0.842955	-0.291674	0.663035	0.0918294	-0.591017	0.0739656	0.771141	-0.541701	0.231186	0.294404	-0.992705	-0.987188	0.260101
145	0.0618579	0.662165	0.0255236	-0.687351	0.36408	0.986828	0.996685	0.993409	-0.543452	0.00621106	-0.0161922	0.98313	0.998041	-0.747673	0.589569	0.321122	0.718568	0.119393	-0.0156985	0.722233	-0.344393	0.984589	0.87973	0.833135	-0.555899	0.255764	0.0794397		0.0313747	0.299901	-0.12766	-0.923601	0.250351	0.180029	-0.350624	0.976607	-0.30425	0.202769	0.555371	-0.990516	-0.440904	-0.0804402	-0.89546	-0.669433	0.0690985	0.0235986	0.182479	-0.303648	0.974757
146	0.120659	-0.325659	-0.317424	-0.593038	0.0807075	-0.0186496	-0.409652	-0.214834	-0.718043	-0.0898442	-0.0413846	0.180392	-0.368966	0.104685	0.46951	0.0667158	-0.248422	-0.234219	-0.149417	-0.0600182	-0.225847	0.130569	-0.293936	-0.410209	0.97651	-0.264777	-0.172733		-0.0482125	-0.244417	-0.0948502	0.0364836	-0.203196	-0.485829	0.254815	0.0165039	0.138829	-0.200944	0.0301068	-0.0527355	-0.536419	-0.13162	0.0534533	0.254299	-0.0967253	-0.22924	-0.0968791	0.137568	-0.222537
147	-0.481994	-0.806943	-0.274975	-0.0435633	0.0566101	0.107005	-0.318812	-0.142741	0.958577	0.0613596	0.219465	0.616605	0.214862	0.178139	0.70115	0.650627	0.590284	0.777134	0.785138	0.314729	-0.0916679	0.244053	0.359103	-0.112135	-0.853941	0.270886	-0.22723		-0.106226	-0.0576656	0.821417	-0.243604	0.0449186	0.720805	0.787568	0.958677	0.177226	0.142063	0.153015	-0.0466583	-0.223082	-0.377064	0.125565	0.208715	-0.171532	0.0272772	-0.213526	-0.670744	0.345915
148	0.263652	0.973299	-0.121428	-0.434878	0.0552693	-0.359704	-0.744569	0.169749	0.0534446	-0.143464	-0.488784	0.579117	0.0290115	-0.541964	0.773361	-0.52755	0.23415	0.0548194	0.0806612	0.221621	-0.0124407	-0.184509	-0.282608	0.577375	0.701972	-0.508479	0.127522		0.514088	-0.169907	0.293336	0.115084	0.191211	-0.740342	-0.229452	0.189329	0.124996	-0.788905	0.417532	-0.150537	0.652564	0.137595	0.0235783	-0.212482	0.853216	0.202964	0.0486633	0.902539	0.352064
149	-0.0418708	0.356985	0.448896	-0.305138	-0.994453	-0.962351	-0.073935	-0.0181614	0.0692517	-0.335348	0.38876	-0.52158	-0.0748879	0.523661	0.220017	-0.464398	0.141818	-0.17424	-0.191211	-0.588829	-0.708463	-0.233477	0.0468601	0.145888	0.560112	-0.021734	-0.0802488		-0.17126	-0.136466	0.0592301	-0.702808	-0.14617	0.0151826	-0.127466	0.344381	-0.0560286	-0.314099	0.316602	-0.631184	0.171122	-0.625515	0.724138	-0.353641	0.4741	-0.402898	-0.314872	0.0442604	0.400567
150	0.0660983	0.666025	0.0814406	0.0459791	0.286957	0.115727	0.0928017	-0.0653855	0.0963446	0.218448	0.201635	0.0972382	0.357984	0.168482	0.161307	-0.478357	0.141581	0.127931	0.221585	0.111145	0.0216634	0.0746608	-0.115606	-0.507523	0.120928	0.0628128	-0.150274		0.16564	0.120856	0.175416	-0.109227	0.170344	-0.137412	0.384682	-0.0403021	0.0115013	-0.0120111	0.0966988	0.229696	0.234111	0.0858769	-0.0814844	0.175706	0.143834	0.217223	-0.127522	-0.373118	-0.00568634
151	0.171409	-0.577683	-0.332431	-0.218772	-0.310115	0.120861	0.0697224	0.180885	-0.43313	-0.147659	0.109692	-0.0396433	-0.247186	0.0156756	0.15509	-0.295131	-0.11426	-0.175657	0.118792	0.0819853	-0.231083	0.318651	0.173212	0.606594	0.262198	-0.0456007	0.0426961		-0.0131968	-0.00455369	0.101173	-0.453644	0.031314	0.012269	-0.171156	0.139438	0.154849	0.0957	0.173285	-0.32402	-0.222562	0.0835896	-0.0645118	-0.202631	0.00329488	-0.000875656	-0.130427	0.301934	0.580182
152	0.502727	-0.841121	0.319057	0.492841	0.519791	0.0589335	0.262483	0.504736	0.103552	0.417835	0.274721	-0.193144	0.500235	0.141647	0.286943	0.547586	0.423299	0.561928	0.0795195	0.308564	0.226329	0.425335	0.126402	0.0278373	0.124035	0.0181788	-0.0214237		0.0875619	0.221744	0.108696	0.358096	0.0728397	0.796981	0.284771	0.98387	-0.0448147	0.311728	0.0669635	-0.286797	-0.154475	0.256379	-0.0119276	0.741336	-0.0683601	0.390207	-0.509018	0.45902	0.299086
153	0.614388	0.699761	-0.99679	-0.848689	-0.155963	-0.626391	-0.888768	-0.125438	-1	-0.035905	-0.975349	-0.827076	-0.743895	-0.949388	-0.954529	0.632871	-0.998565	-0.261195	-0.993327	-0.622677	-0.938735	0.095073	-0.916631	-0.974511	-0.700488	-0.526355	-0.986801		-0.996014	-0.870143	0.323144	0.198751	-0.946208	-0.729111	-0.986789	-0.573633	-0.97949	-0.97898	0.306469	-0.999737	-0.242536	-0.915366	-0.130352	-0.0812904	-0.808736	-0.917485	-0.99988	-0.633898	-0.072101
154	-0.0375674	-0.566149	-0.192155	-0.469428	-0.782075	0.404195	0.238815	-0.965249	0.486858	-0.912746	-0.288365	-0.347657	-0.694188	-0.856538	0.0999988	0.827991	-0.753367	-0.206648	-0.661834	0.150993	-0.966662	-0.863372	0.146802	0.789722	-0.938976	-0.543113	-0.947981	-1	0.868243	-0.344686	0.744307	0.947569	-0.425039	-0.993117	-0.770634	-0.98178	0.931457	-0.220632	0.170093	-1	-0.999589	0.763794	-0.489535	-0.895006	-0.799411	-0.401919	-0.999974	0.92239	0.130653
155	0.626358	0.878334	0.730527	-0.756363	0.917163	-0.121407	-0.902666	-0.0823898	0.472631	0.93352	0.774378	0.999688	-0.473231	-0.997073	0.506831	-0.467121	0.988291	0.928691	0.997833	0.00842667	-0.228837	0.897687	0.270861	-0.998714	0.571281	0.00353667	0.334068	1	0.164399	-0.861885	-0.427739	-0.455772	0.962158	0.969513	0.947559	0.795122	-0.230206	-0.181641	0.106065	-0.995243	0.909514	-0.366398	-0.174671	-0.961164	0.68755	0.728395	0.325806	-0.572535	0.547694
156	0.0943638	0.55133	-0.910284	-0.0714632	-0.357468	-0.0415688	0.843062	0.300147	-0.206516	-0.801609	0.647411	0.439328	-0.918571	0.417626	0.972892	-0.899427	-0.0863672	0.0343965	-0.0715295	0.163751	0.676873	-0.520657	-0.28203	0.911982	-0.211206	0.153374	-0.256723		0.411496	-0.237046	0.404293	0.561847	-0.94299	0.188642	-0.941292	0.491667	0.140266	-0.0919169	0.503963	-0.17285	0.22486	-0.172963	0.654682	0.742508	0.996462	0.589088	-0.822048	0.550203	0.32078
157	0.875827	0.366717	0.647171	0.895551	-0.317448	-0.849515	0.651422	-0.686384	-0.181379	0.960973	0.583131	0.494839	0.909714	-0.310833	-0.588531	-0.751132	0	0.3142	-0.129049	0.82922	0.83205	-0.074328	-0.265654	-0.934427	0.887217	-0.129152	-0.707107		0.689655	-0.331819	0.642735	-0.306721	0.895404	0.983151	-0.632158	0.295306	-0.218583	-0.110432	0.311822	-0.879889	-0.244485	-0.773336	-0.726207	-0.779325	0.304081	0.460317	0.196607	-0.498964	0.970143
158	0.493435	-0.58774	-0.784046	0.969731	0.439553	0.640184	0.33501	0.720535	0.848746	-0.299196	0.914735	0.804176	-0.318934	0.527521	0.743904	0.99808	0.8555	0.150274	0.837933	0.433612	0.867772	0.321365	0.225312	0.908561	0.49597	0.0409295	-0.294086		0.775235	-0.00563371	0.629422	0.658835	0.52058	0.0128195	0.968941	-0.373691	0.707107	0.382648	0.499594	-0.794843	-0.971154	0.280326	0.0952176	0.423182	0.848368	0.540934	-0.158506	0.981647	0.902263
159	0.893836	0.915424	-0.426842	-0.0533996	0.165829	0.35817	0.0753862	0.846233	0.438277	0.0105535	0.41935	0.514496	0.264574	-0.745545	0.859293	-0.738029	-0.0441745	-0.815296	-0.237277	0.113234	0.134458	0.41367	0.178982	-0.529057	-0.000958772	0.111149	0.39985		0.293923	0.485976	0.10061	0.406032	-0.258316	-0.920867	-0.362446	0.303566	-0.533419	0.298357	-0.859448	-0.469039	0.957612	0.286822	0.400173	0.0240631	-0.0164451	0.452756	0.506869	-0.950697	-0.820905
160	-0.982029	0.92735	-0.951157	-0.736873	0.0583198	-0.371391	-0.749838	0.177256	-0.7943	-0.543971	-0.999534	0.997459	0.501271	0.0326357	0.756968	0.828359	-0.266002	0.0557346	0.161132	-0.302778	-0.977896	-0.939793	-0.106051	0.940225	-0.848689	-0.630593	0.547419		0.525493	-0.606782	0.0776866	0.988837	-0.69686	0.556175	-0.177398	-0.0503946	0.0217932	-0.847099	0.32642	-0.9979	-0.97923	-0.363542	-0.203567	-0.630364	-0.357481	-0.92549	-0.914716	0.805353	0.723191
161	0.347631	-0.0668359	-0.173071	-0.536875	-0.273744	0.0766965	-0.247901	-0.511571	-0.959018	-0.191027	-0.0480874	-0.189765	-0.608158	-0.0584107	0.47235	0.389898	-0.426298	-0.841178	-0.300535	0	-0.46541	0.627684	-0.992746	-0.701153	-0.477579	-0.797258	-0.535117		-0.231854	0.0371215	-0.144769	-0.129924	-0.166513	0.631477	-0.281407	-0.276259	-0.31028	-0.339044	0.9005	-0.196672	-0.214261	0.192173	0.779833	-0.0140173	0.00203045	-0.0708495	-0.163386	-0.63885	-0.486474
162	0.779271	-0.747881	0.0418481	-0.145609	0.151562	-0.294147	-0.290439	0.764165	0.571935	-0.593649	0.0419478	-0.339265	-0.985142	0.991554	0.99069	0.639532	0.366036	0.773957	-0.684976	0.394892	0.0504973	-0.316228	0.410945	-0.982056	0.976187	0.115781	0.993884		0.452778	0	0.427856	0.704209	0.668823	0.792187	-0.707107	-0.106092	0.323914	0.663867	-0.188591	-0.234579	0.944036	-0.890043	-0.280126	-0.843227	0.476396	0.290788	-0.498284	0.812199	-0.291284
163	-0.2091	-0.200684	-0.987262	-0.39634	-0.483536	-0.646977	0.140231	-0.523337	-0.628794	0.996005	0.375705	0.632267	0.814955	-0.3392	-0.768221	-0.961338	-0.911493	-0.972405	-0.98865	-0.998937	-0.426298	0.445585	-0.416472	0.862311	0.326807	-0.379505	-0.4183		-0.930873	-0.526223	-0.385725	-0.735469	0.848577	-0.987506	0.465448	-0.997124	-0.505719	-0.782349	0.877585	-0.993677	-0.992964	-0.999966	-0.308848	-0.344686	-0.985152	0.773957	-0.81536	-0.989805	-0.773542
164	0.602469	0.739725	-0.369117	0.0178298	0.205724	0.696337	-0.206463	0.177872	-0.040562	-0.369239	0.492191	-0.264971	0.606537	-0.489064	0.84384	0.105206	0.442901	-0.254045	0.166338	-0.0912672	0.0603295	-0.869911	-0.773356	0.280977	0.0753769	0.898316	-0.291414		0.243964	-0.00498747	0.744675	0.561067	-0.105733	0.948683	-0.914831	0.456186	-0.039109	-0.263117	0.894427	-0.0566773	0.796209	0.354227	-0.778933	-0.0040816	0.121086	0.0378701	-0.903221	0.439407	0.0657912
165	0.200396	0.566752	-0.331273	0.11141	-0.246774	0.248483	-0.911922	0.194098	0.628969	0.935861	-0.574653	-0.252818	0.185892	-0.900844	0.606795	-0.496139	-0.993151	0.242536	-0.853343	0.254221	0.218788	0.792957	0.833712	0.854421	0.253056	-0.096935	-0.541822		0.13972	-0.310452	0.154531	-0.815624	-0.996711	0.270782	0.849441	-0.236111	0.206812	0.231703	-0.197667	0.444518	-0.56921	-0.506502	0.999541	0.201505	0.365088	-0.202287	-0.505457	-0.543364	0.771962
166	0.21473	-0.783029	-0.424203	0.481259	-0.839764	0.943939	-0.558055	0.362716	-0.51551	-0.997674	0.99619	0.754164	-0.834204	-0.871248	0.93896	-0.519469	-0.0371644	0.323837	0.120092	0.285759	-0.850798	0.221467	0.180518	0.832343	-0.679351	0.615271	0.798362		0.662574	0.099071	0.966627	0.508266	0.982414	-0.895895	-0.385106	0.0323904	0.97271	-0.0029455	0.82281	-0.0389315	0.791914	0.652586	0.646561	-0.640184	0.0897267	0.748948	0.191602	0.726674	-0.87168
167	0.185306	0.7954	0.149026	0.929961	0.577075	0.620703	-0.925252	0.795829	0.336233	0.43601	0.204064	0.424434	0.964268	0.793003	0.493756	0.994363	0.308807	-0.984637	0.506078	0.0722489	0.924606	0.103912	-0.249576	-0.800473	0.581238	0.00438977	-0.236352		0.977245	0.674769	0.101599	-0.113455	0.449981	0.0797452	0.719844	-0.971814	-0.526235	0.737154	0.344533	-0.833183	0.617557	0.35034	0.714598	0.19996	0.2356	0.113781	-0.228776	0.974288	0.951687
168	0.598735	0.897122	0.477092	-0.141421	-0.998156	0.946582	0.911859	-0.144051	-0.847287	0.21693	0.210456	-0.0850994	-0.592897	-0.413803	-0.0255357	-0.377728	0.045684	0.293937	0.603583	0.993293	-0.0624927	0.562643	0.188773	0.0956296	0.479238	-0.957826	-0.801433		0.24441	-0.182212	0.828205	0.769588	0.483965	-0.173984	0.547704	0.628266	0.657675	0.1085	0.0297591	-0.547157	-0.918227	-0.167595	-0.0951083	0.775436	0.652894	0.428835	0.551987	0.329336	0.924385
169	-0.38075	-0.903296	-0.999999	-0.668296	0.0551645	-0.507354	-0.0208469	0.298033	0.996398	-0.456135	-0.187194	-0.611214	-0.0705475	0.545456	0.239782	-0.0725357	-0.33235	-0.677816	-0.285425	-0.0662812	0.30693	-0.230557	-0.885692	-0.653161	0.00823501	0.0223779	-0.0426961		-0.547868	-0.999295	0.183428	-0.254926	-0.914991	-0.411779	-0.779478	-0.403358	-0.120776	-0.499274	-0.99763	-0.481919	-0.167473	-0.3844	-0.988676	-0.15952	-0.458955	-0.210014	-0.459944	-0.755566	-0.0116001
170	0.136037	-0.300027	-0.502369	0.730486	0.122155	-0.798982	0.831784	-0.555622	-0.366947	0.100595	0.385668	0.0734389	0.738677	0.4741	-0.0406363	-0.470084	0.131153	-0.278024	0.999979	0.655769	-0.486227	-0.753676	0.509074	0.469052	-0.293158	0.0298717	-0.682137		0.306009	-0.441254	0.287624	-0.151381	-0.0139621	-0.352015	-0.823892	-0.740093	-0.184289	0.529999	-0.989359	-0.736426	-0.316627	0.43248	0.871002	-0.131069	0.810768	0.271819	-0.495303	0.176418	-0.0420385
171	0.066631	0.743659	-0.1766	0.157792	-0.252585	0.164093	0.00394086	0.204046	0.95091	0.260763	-0.247433	-0.099044	0.0806354	-0.691468	-0.113091	0.467853	0.0805114	0.336408	0.0778661	0.016333	-0.0631505	0.352761	0.114267	0.624935	-0.341454	-0.100039	0.50262		-0.205566	0.280625	0.0267642	0.0640704	0.384615	-0.670217	0.465556	-0.0550466	0.0851098	0.712262	0.723651	-0.113054	0.802128	0.274011	0.567882	-0.0851021	0.0803842	-0.00828129	-0.417765	-0.212986	0.0376752
172	0.473535	-0.815885	-0.976919	-0.619925	-0.354427	0.738856	0.707107	-0.35533	-0.409488	-0.769854	0.297569	0.258429	-0.66719	-0.97185	-0.339521	0.988019	-0.527095	0.95468	0.574356	-0.192099	0.891864	0.291038	0.790415	-0.999597	-0.51214	0.0497122	-0.99997		0.545149	0.548163	-0.74854	-0.0452995	-0.738428	0.0572828	-0.563337	-0.87529	-0.113343	0.964104	0.0937973	-0.404506	-0.748619	-0.407884	-0.893246	-0.782325	0.667754	-0.330514	-0.311512	0.985612	0.999648
173	0.985999	0.116093	0.125471	-0.190603	0.998153	0.161591	-0.590807	-0.00641012	0.121419	-0.0227214	0.149465	0.301235	-0.486082	-0.872228	0.398173	-0.315754	0.282522	0.552867	0.895466	-0.160865	0.563337	0.0715862	-0.12251	-0.741795	0.812661	-0.853884	0.312618		0.105899	-0.742393	0.703779	0.988974	0.556675	0.596939	0.557124	-0.176554	-0.396251	0.158553	0.0637002	-0.935159	-0.673673	0.619576	0.77763	-0.519794	-0.667248	0.935948	0.120006	-0.321775	0.0553871
174	-0.199287	0.864102	0.53548	0.308748	0.503108	-0.378047	0.454142	-0.479175	0.243805	-0.836461	0.0196812	-0.575008	0.750479	0.988799	-0.815058	-0.293261	0.147969	-0.3947	-0.371155	0.00293254	-0.0808159	0.539597	-0.121871	0.390994	-0.950249	-0.00491395	-0.653524		0.60628	0.970558	0.407159	0.578083	0.668096	0.511538	-0.90581	0.00341295	-0.647434	0.978293	0.295411	-0.384003	-0.0710787	0.474855	-0.562191	0.391817	0.79247	-0.403344	-0.978434	0.536473	0.269578
175	0.967146	-0.648617	-0.413601	0.073663	0.495573	-0.0381281	0.871034	0.942269	-0.279872	0.91939	-0.00610987	-0.80961	-0.844712	0.99614	0.90954	-0.326207	0.0632534	-0.892036	0.971267	0.295611	0.969134	-0.919145	0.655353	0.880738	-0.313146	0.675817	0.403258		0.746047	-0.332309	0.494265	0.580352	0.371929	0.390951	-0.991228	0.287577	-0.220036	-0.404828	0.645995	-0.736776	0.977078	-0.447214	0.764467	0.961744	0.588024	0.924167	0.55307	0.885692	0.875142
176	0.69836	0.582112	0.485456	0.311822	-0.0846946	0.292854	0.281814	0.224681	-0.151601	0.353843	0.615478	-0.0963802	0.561191	0.283212	0.431141	0.712517	0.971709	-0.274211	-0.403398	0.871837	0.0857588	0.203809	0.0738717	0.546442	0.756301	-0.0494563	-0.274468		0.109572	0.206378	0.487139	0.726647	0.608126	0.00582514	-0.0366134	-0.796464	0.242536	0.830328	-0.13056	-0.160587	0.401412	0.0791847	0.52386	0.541162	0.583455	0.10999	-0.177927	-0.564556	0.931578
177	0.242057	0.920691	-0.366036	0.0290154	0.129477	0.31896	0.0767792	-0.735567	-0.0240315	-0.186995	-0.156455	-0.102989	0.308022	-0.737345	-0.144383	0.438999	-0.108258	-0.378703	-0.116202	-0.201177	0.0955674	-0.112988	-0.150024	-0.610338	-0.0239112	0.0130495	-0.0411798	-1	-0.232696	-0.330395	-0.286057	0.299408	-0.265221	-0.3419	-0.00298209	-0.107261	-0.0990074	0.58632	0.0205978	-0.363442	0.49628	0.159203	-0.643235	-0.361719	0.109071	0.106105	-0.0755727	0.353319	-0.535265
178	0.0298375	0.995962	-0.700663	-0.322114	0.118289	0.00508253	-0.337321	0.989758	-0.337055	-0.0785348	0.17861	-0.660773	-0.380326	-0.219435	0.127971	-0.659598	0.172729	-0.569846	-0.132594	-0.25086	-0.588694	0.489796	-0.0800482	0.500588	-0.195513	-0.35496	-0.570366	1	0.00126422	-0.381064	0.149174	-0.34266	-0.0939226	-0.246985	0.444178	-0.0861315	-0.748707	0.138989	0.297461	-0.575046	-0.919435	-0.420377	-0.16264	0.181836	-0.040858	-0.804623	-0.38768	-0.475015	0.724603
179	0.994309	-0.954728	0.0242516	0.422885	-0.222295	-0.859293	-0.726373	0.0512148	0.154011	-0.985887	-0.442902	0.280819	-0.0999751	-0.398726	-0.27528	-0.204923	-0.886002	0.602833	0.0735913	0.0489056	-0.677984	0.481445	-0.0239062	-0.980534	-0.909738	-0.341226	0.0829251	-1	-0.501307	-0.619017	-0.0160622	0.739879	-0.502515	0.81416	-0.8947	-0.860444	-0.094878	-0.0591952	-0.125973	0.59239	-0.0380889	-0.220372	0.334302	-0.658859	-0.797161	-0.170103	-0.761646	0.921186	0.0772334
180	-0.255391	0.999968	-0.299622	-0.372278	0.746451	0.550103	0.0760503	-0.133065	0.992335	0.447214	0.972511	0.0379473	-0.989657	0.952549	0.242536	0.911805	0.828517	-0.686102	-0.393471	0.230425	-0.844408	-0.98779	-0.147639	0.962953	-0.56921	-0.897554	0.963375	1	-0.101215	0.586775	0.442006	-0.904548	-0.989949	-0.395458	0.989531	-0.443203	-0.898327	0.571985	0.991541	-0.900737	0.915137	-0.500528	0.376704	0.869837	0.0281578	-0.135203	-0.793952	-0.888744	0.516493
181	-0.269929	-0.323628	0.0901081	0.999201	0.503577	-0.208662	0.72311	-0.911587	-0.128451	-0.741274	-0.982299	0.548177	-0.429934	-0.740987	-0.456404	-0.328792	0.0475651	-0.713684	0.254845	-0.43212	0.434872	0.986828	0.628468	-0.831655	-0.417772	0.356155	0.860927		-0.198706	-0.428179	0.336645	0.832398	-0.159232	0.833069	0.741776	0.511381	0.336479	-0.715494	0.999819	-0.925848	0.0245827	0.836461	-0.12016	0.0703646	0.96167	0.293647	-0.197713	-0.13252	0.419677
182	-0.536272	0.155182	0.840898	0.993376	0.761276	0.205851	-0.709334	0.433816	-0.198691	0.493568	0.999992	0.897089	0.886269	0.685414	0.318098	0.160293	0.535626	0.272983	0.917378	0.055584	0.992526	0.196116	0.395952	0.248477	0.971601	-0.0386807	-0.162749	-1	0.520056	0.867957	-1	-0.838331	0.557998	0.798753	0.690113	0.907608	0.214407	0.21243	-0.923929	-0.960036	0.774962	0.357533	0.137243	-0.155963	0.984363	0.283652	0.583713	0.587851	0.724921
183	0.222783	0.0294515	-0.280567	-0.248433	0.319095	-0.151998	0.227774	-0.0607774	0.154902	-0.0719697	-0.0782616	0.186925	-0.00352856	0.0285824	0.253698	0.220045	-0.0324084	-0.0830455	0.0589851	0.205124	-0.0149983	-0.0101471	-0.58386	0.273377	-0.134201	0.121054	-0.0154387	1	-0.136308	0.0169093	0.0691865	0.184506	-0.105159	0.269086	-0.73559	-0.165323	0.0521573	-0.117124	0.106011	-0.147502	-0.126156	-0.0877006	0.120755	0.0602284	-0.0755778	0.0474299	-0.175213	0.221912	0.027649
184	0.482316	-0.937143	0.347028	0.976889	-0.35621	0.568514	0.522495	0.922381	0.42026	0.230108	-0.00152207	0.920091	0.756116	-0.935046	0.174644	-0.303841	0.535273	0.653395	0.967023	0.504114	-0.574946	0.781157	0.497953	-0.983483	0	0.129339	0.501764		0.566777	0.11982	0.429404	0.226362	0.023454	0.900744	-0.358183	0.746956	-0.198971	0.567697	0.317229	-0.117599	0.286987	0.202668	0.697007	0.951125	0.463737	0.969169	-0.00790489	-0.221322	0.286036
185	0.932217	0.961935	-0.289668	-0.272784	0.817074	-0.570482	-0.250874	0.0522053	0.01284	-0.0549331	0.0350661	-0.0101658	-0.24769	-0.212253	-0.504263	-0.377779	-0.155806	-0.355061	-0.103808	-0.00672631	0.143103	0.380861	-0.0338788	0.000874126	-0.198832	-0.19666	-0.196116		-0.168115	-0.137389	0.0343272	0.947994	-0.266324	-0.0483452	0.0203318	0.0096926	-0.0181666	-0.159276	0.0169218	-0.210884	0.477947	-0.24372	-0.429934	-0.577397	-0.214191	-0.264749	-0.49855	0.175863	-0.116308
186	0	-0.988234	0.538268	-0.550899	-0.0943485	0.583929	0.967865	-0.780666	0.542127	-0.219799	-0.606043	-0.12425	-0.728455	-0.60624	-0.200061	-0.871498	-0.729537	0.962508	0.120519	-0.100212	0.383717	0.851232	-0.328932	0.998468	-0.929157	0.0173475	0.710514		-0.95713	-0.852967	-0.490609	0.239628	-0.62303	-0.485007	-0.277896	-0.0715649	-0.677509	-0.325698	0.112715	-0.999996	-0.906152	-0.937222	0.624996	-0.00858337	-0.892213	0.431905	-0.741168	-0.628784	0.926069
187		-0.506919	0.430473	0.77319	-0.0933852	0.0983236	0.940663	-0.0255889	-0.0442915	-0.559247	0.592772	-0.627128	0.209634	0.654201	0.159604	0.598013	0.135647	0.175213	0.858273	0.00702559	0.0823357	-0.317497	-0.196116	-0.956942	0.746933	-0.216627	0.669676		0.0583619	0.46662	-0.221231	0.728923	-0.998128	-0.661533	0.947247	0.997934	0.281643	-0.471877	0.388843	-0.836267	0.336563	-0.921755	0.342255	0.236352	0.794874	0.149918	-0.958386	-0.691503	-0.591468
188		-0.764829	-0.941796	-0.999349	0.467527	-0.517858	0.695441	0.481009	-0.133377	0.25723	-0.455363	-0.944703	0.741463	-0.483856	0.285092	0.253898	0.260719	0.912359	-0.772246	-0.5713	0.979734	0.249928	0.031636	0.979293	0.166423	0.156082	-0.676432	-1	-0.0139707	0.465962	1	-0.986768	-0.885994	-0.120198	-0.992917	-0.319885	-0.986606	-0.396988	-0.357936	-0.509561	-0.659301	-0.111026	-0.918998	0.695531	0.136366	-0.533794	-0.725953	0.550875	0.199888
189		0.726117	0.328975	0.567068	0.0857806	0.377121	0.615271	0.937054	0.346474	0.240725	0.412865	0.00722003	0.173168	-0.777779	-0.0914155	-0.447214	0.199246	0.110287	0.0813288	0.165893	0.0447826	0.0736044	0.0954993	-0.928576	0.0412575	-0.810041	0.14573	1	-0.0592895	0.324777	0.297922	0.24941	0.32605	0.0093236	0.9527	-0.567265	0.181547	-0.17236	0.302207	0.229039	0.689056	0.116644	0.161489	-0.291342	0.398597	0.244708	-0.207368	-0.48129	0.656148
190		-0.927181	-0.811295	-0.755633	-0.00326263	-0.793026	-0.933675	-0.949395	-0.468536	0.562254	-0.564285	-0.395158	-0.928618	-0.757561	-0.351447	-0.343582	-0.281643	-0.51622	0.453508	-0.870783	0.280104	0.917643	-0.2843	0.692225	-0.580094	0.203758	-0.342085		-0.535431	-0.796988	-0.996194	-0.686515	-0.56231	0.67774	-0.953385	-0.303411	-0.406402	-0.538687	0.908957	-0.0556756	-0.915315	-0.927972	-0.979937	0.997245	-0.469497	0.0341167	-0.952338	0.39989	0.563025
191	0	0.710095	-0.98387	0.98446	-0.954385	0.988936	-0.530444	-0.552967	0.238222	-0.956352	0.920773	0.650791	-0.910485	-0.982635	0.496139	0.726698	0.2628	0.173221	-0.0343883	0.477575	0.857933	0.956014	0.409355	0.814812	-0.975441	-0.354509	0.946113	-1	0.328961	0.990852	0.0338348	0.396959	0.997819	-0.998029	0.997645	0.951709	-0.993819	-0.783498	0.443932	-0.199364	0.90883	0.199421	0.624096	-0.127491	0.988852	-0.631803	0.777448	0.675013	-0.231792
192	-0.902718	0.845602	0.263117	0.959737	0.556508	-0.291162	0.48587	-0.469849	0.0578738	-0.426863	-0.994505	-0.984201	0.8	0.99933	0.142683	-0.415792	-0.992207	0.492545	-0.871152	-0.0896733	-0.978234	0.976762	-0.0711984	0.985067	0.30398	0.11291	-0.963398		-0.776993	0.319058	0.186857	0.80128	0.989185	0.856852	-0.899107	-0.976644	-0.346972	0.380439	0.119617	-0.999408	0.370377	-0.512506	0.378525	0.999359	-0.11967	0.393049	0.161029	0.903986	-0.118771
193	-0.800285	-0.999728	0.461934	0.519644	0	-0.754923	0.11897	0.378032	0.318502	0.349416	-0.529999	0.827677	0.996058	-0.921694	0.400087	0.992912	0.570396	-0.645564	0.135164	0.373683	0.901276	0.988372	0.289424	-0.914041	0.126873	0.241894	0.475779	1	0.557942	1	0.502072	-0.581838	-0.452045	0.80834	0.846355	0.531683	0.847998	0.724787	0.430473	0.85902	0.725443	0.402739	0.689655	-0.24497	0.431598	0.0657912	0.213842	0.15684	0.995203
194	-0.918887	-0.786374	-0.486091	0.154815	0.236582	0.442276	-0.273235	-0.0278776	-0.769837	-0.886171	0.629628	-0.360312	-0.599513	0.677931	0.00757554	0.99998	0.563001	0.0299865	0.251425	-0.313843	0.37651	0.381902	0.329076	-0.845264	0.0119991	0.165133	0.0391856		0.280374	0.00513472	-0.0594514	0.793807	-0.1939	-0.884385	-0.456461	0.300157	0.203043	-0.0320568	0.00940029	0.568844	-0.88148	-0.264717	-0.339065	0.0291846	0.658368	0.0834641	0.195774	0.371096	-0.139611
195	0.944523	0.545592	-0.360016	0.320404	0.877003	-0.727083	-0.969452	0.331245	0.999979	-0.776114	-0.74092	0.119775	0.798075	0.26938	0.410986	0.305924	0.999692	-0.582707	-0.247325	-0.34768	0.365209	-0.994077	-0.652039	0.998982	0.999839	0.0268617	-0.702885		-0.0913715	-0.720833	0.75052	-0.592418	0.931106	0.748862	0.581343	0.553123	-0.204235	-0.990238	0.0213187	-0.241955	-0.300682	-0.489367	0.441434	-0.959629	-0.534907	0.179485	0.735715	-0.954405	0.55296
196	-0.132036	0.805253	0.00424925	0.174302	-0.0301693	0.642116	-0.42165	0.0695283	-0.248429	-0.185777	-0.127298	-0.129999	-0.959112	0.220063	0.110596	-0.250772	-0.201442	-0.0663705	0.121182	0.111938	-0.0635207	-0.00109349	-0.0768331	-0.667535	-0.110174	-0.27745	-0.0924264	-1	-0.0193668	-0.119145	-0.369475	0.299119	-0.193321	0.0382582	0.46105	-0.451657	-0.0631042	-0.282713	0.0342037	-0.224173	0.197161	-0.0432288	-0.105469	0.0189647	0.0766965	-0.140159	0.0467371	0.124117	0.196538
197	-0.361977	0.335898	-0.206258	-0.16423	0.215018	0.0447869	0.0290937	-0.282806	0.0496097	0.307327	-0.264717	0.344003	0.960576	0.237954	0.359623	-0.261054	-0.119313	0.347744	0.0949884	-0.0409542	-0.345066	0.421257	0.110751	0.625988	0.398192	-0.108632	0.0982282		-0.090177	0.00978427	0.12167	0.093803	-0.0256326	-0.401725	-0.772045	0.0252533	0.0187467	-0.0625476	0.0246693	0.242069	-0.651798	0.244154	0.635388	-0.0442409	0.164751	0.477155	0.0478233	-0.35914	-0.00323623
198	0.383858	-0.22386	-0.483518	-0.42079	-0.194648	0.112964	-0.924189	0.193292	0.432226	-0.839893	0.574094	-0.450443	-0.757325	-0.745298	-0.547925	0.935457	-0.649781	-0.706327	-0.385264	-0.807715	-0.634246	0.82924	-0.580864	-0.036059	-0.860271	-0.277202	-0.567124		-0.978122	-0.218583	0.976707	-0.844936	0.0196041	0.999124	0.941921	-0.686787	-0.815309	-0.369951	0.222172	-0.866555	0.999037	-1	0.0740152	-0.761131	0.0959193	-0.979702	-0.893007	-0.872143	-0.714872
199	-0.0659921	0.50856	0.0395374	-0.735424	0.155044	-0.138239	0.072101	0.362175	0.0969438	0.545323	-0.0559967	0.0214674	0.290772	0.428979	0.0444006	-0.999629	0.344508	0.315099	0.162052	0.25822	0.0293034	0.467639	0.154422	-0.290497	0.444339	0.429276	0.496262		0.222299	0.251103	-0.38251	0.588447	-0.0843544	0.173227	-0.674345	0.28589	0.079351	0.34963	0.227111	0.230979	0.0723375	0.0998994	-0.540916	0.518215	-0.0230155	0.0830455	0.191259	0.128757	0.495304
200	-0.420574	0.79112	0.511865	0.626852	0.445872	-0.759104	-0.418734	0.923875	0.118536	-0.323772	-0.0660804	-0.0318021	-0.403913	0.295184	0.219827	-0.532886	0.393739	0.0741136	-0.0179458	0.0373959	-0.191283	0.243906	-0.16239	-0.154466	0.11885	0.292219	0.230242		-0.00899851	-0.0985062	0.035197	-0.125122	0.182786	0.372001	0.957922	0.0834345	0.211487	0.0291754	-0.128379	-0.391779	-0.102861	-0.0789356	0.254294	-0.063987	-0.0142436	0.21238	-0.229577	0.908818	0.881408
201	0.994909	-0.714451	-0.462809	0.409339	0.906419	0.618821	0.45122	0.220337	-0.249084	-0.628697	0.937177	-0.292551	-0.993159	0.23386	0.560488	0.698189	-0.0938599	0.349493	-0.209529	-0.0166644	-0.610508	0.708026	0.932361	0.995567	-0.845349	0.737154	0.173909		0.68622	-0.472882	0.29794	0.307912	0.997555	0.985	-0.137275	-0.906137	0.929533	0.105469	1	-0.569585	-0.719038	0.307894	0.501844	0.0157709	0.241336	-0.5547	0.106533	-0.980941	0.190022
202	0.159738	0.804102	0.0757133	-0.0938056	0.0546353	-0.941878	-0.282659	0.220672	0.628981	0.0669086	-0.141251	0.31981	0.958075	-0.271066	0.0688021	-0.0415945	-0.0943781	-0.168708	-0.24137	0.980085	0.320522	0.239935	0.173494	-0.239568	0.887326	-0.0437798	-0.36828		0.0621146	0.495949	-0.180811	0.131372	0.491123	-0.166897	0.388057	-0.977219	-0.323796	-0.210374	-0.271584	0.521259	0.537936	-0.155531	-0.369325	-0.090186	0.300526	0.162441	0.489668	0.213205	0.487403
203	-0.307698	-0.368811	-0.101076	-0.950697	0.805125	-0.382525	0.116697	-0.194284	0.422778	0.513547	0.0350907	-0.0404785	-0.0413439	0.643783	0.646703	-0.993133	0.233889	0.636095	0.157396	0.0850565	-0.135071	-0.311383	-0.0391217	-0.999724	-0.999969	-0.0779381	0.0646532		-0.0865663	-0.0654332	-0.53434	-0.233406	0.00725934	0.0958456	-0.72577	0.280429	-0.0414925	-0.348701	0.209529	-0.360693	0.743294	0.584886	0.618066	-0.0734639	0.971297	-0.319172	-0.0350661	-0.51924	0.312976
204	-0.204801	0.596431	0.0499376	0.408631	-0.237356	0.0851596	-0.98178	-0.403344	-0.142885	-0.0559124	0.68869	0.136218	0.559741	0.9534	0.0131136	0.921635	-0.437383	-0.765627	-0.178593	-0.257977	0.596524	0.608788	0.00817969	0.977986	0.988372	0.209361	-0.499926		-0.280695	0.0789268	-0.0594971	0.823797	0.432662	-0.999665	0.925003	-0.245608	-0.982624	0.59261	0.638549	-0.558225	0.513596	0.901046	-0.231987	0.363415	0.519658	0.680638	0.380216	-0.663035	0.699625
205	-0.966593	0.986006	-0.345588	0.956007	0.0768364	-0.0482897	-0.470801	0.0352204	0.0236681	0.290939	0.122448	0.0667115	0.408557	-0.133235	-0.29806	-0.601786	-0.0105535	0.542664	0.0636389	0.97898	0.0143663	0.47328	-0.0823357	-0.949088	-0.322221	-0.0510555	-0.0462961		-0.242536	-0.155903	-0.300333	-0.351644	-0.561158	-0.539796	0.935713	-0.391958	-0.33986	-0.623223	-0.467334	-0.168629	-0.465205	-0.913269	-0.462744	-0.106704	-0.365357	-0.200641	0.171912	-0.476673	0.073485
206	-0.182592	-0.184782	-0.498124	-0.765397	-0.976428	-0.387266	-0.795432	-0.460895	-0.155963	-0.531968	-0.101084	-0.637568	-0.716399	0.998516	-0.21264	-0.969644	-0.190772	-0.457815	0.164927	-0.0931803	-0.541363	0.582712	0.106152	-0.183734	-0.582416	-0.36237	0.204268		-0.404601	0.132791	-0.0208288	-0.976236	-0.7088	0.127971	-0.978056	0.138327	-0.252138	-0.392763	0.508617	-0.678635	-0.29784	-0.512855	0.16588	-0.190377	-0.295497	-0.201653	-0.321218	0.251855	0.341041
207	-0.0512919	0.997909	0.668652	0.789569	0.691311	0.942443	-0.0892779	0.390889	-0.178951	0.357897	0.994132	-0.599284	-0.0999751	0.308161	0.550237	0.986888	0.909629	0.908511	0.344453	-0.336336	-0.0228948	0.488603	0.528488	-0.453962	0.590264	-0.0679743	0.424434		0.476594	0.0782715	-0.747252	0.803298	0.202822	-0.506839	0.976983	-0.903134	-0.024383	0.718496	0.160777	-0.091717	0.976143	-0.230098	0.740446	0.431017	0.175151	0.0694834	0.968603	0.417098	-0.300009
208	-0.0625125	-0.914784	-0.456392	0.678985	-0.496957	-0.475866	-0.202506	0.803756	-0.938527	0.0506595	0.175365	-0.152997	0.440693	-0.378145	0.0539753	0.997067	-0.251524	-0.1432	0.00419723	-0.0680028	0.429934	0.0976473	-0.222142	-0.036059	0.81083	-0.105811	-0.401699		-0.176664	-0.302119	-0.0950391	-0.41741	-0.34322	0.106928	-0.505863	0.257365	-0.112955	-0.127545	0.165199	0.016861	-0.234876	-0.134364	-0.32662	-0.171464	0.256386	-0.0714221	-0.401974	-0.235389	0.292898
209	0.185462	0.728816	0.75313	0.334538	0.300345	0.998856	-0.959569	-0.255933	0.219134	0.350597	0.605201	0.347314	0.819798	0.974229	0.0581764	0.671482	0.845193	0.0151211	0.458289	0.0316048	0.924891	0.818432	-0.471766	-0.977621	0.341321	0.137441	0.998972		0.0778877	0.97855	0.387693	0.517356	0.962476	-0.205163	-0.826882	-0.152384	-0.058722	0.540412	0.496531	0.90918	0.557405	0.19439	0.356463	0.252083	-0.160569	0.97536	0.530431	0.847123	0.96067
210	-0.476283	-0.997581	-0.112249	0.638117	0.846039	0.781638	0.0921593	-0.827362	0.340274	0.117316	-0.117365	0.967348	-0.146431	-0.289077	0.69978	-0.781305	-0.189651	-0.320161	0.982963	0.563218	0.70114	-0.836766	0.416233	0.906789	0.967472	-0.751361	-0.3241		-0.599051	0.769758	0.998274	-0.981772	-0.764628	-0.973331	0.832139	-0.743294	-0.753726	-0.672673	-0.154412	-0.733895	-0.0189539	-0.221832	-0.935039	-0.619315	-0.145036	-0.367779	0.648846	0.343866	0.302309
211	0.48799	0.972457	-0.0866296	-0.257988	-0.492228	0.0668359	-0.593001	0.778651	0.841879	-0.340913	0.757071	0.681301	0.938478	0.0509974	0.939793	0.897789	0.532127	0.453506	-0.389457	0.128278	0.320066	0.558041	0.954288	-0.900137	-0.354427	0.196821	-0.882353		0.999904	0.332416	-0.948683	0.846489	-0.840715	0.862271	-0.877028	0.0228251	0.933696	0.831733	0.447517	0.411201	0.151515	0.942323	0.975369	0.978507	0.389063	0.0245626	0.816899	0.59562	0.569406
212	0.572825	-0.973224	0.324878	0.706567	0.094615	-0.994805	0.991984	0.965972	-0.128554	-0.476856	0.6573	0.905066	-0.652185	0.990022	0.48116	0.984531	0.10591	0.39943	0.220425	0.763386	0.924481	0.995305	-0.774209	0.955456	-0.133918	-0.352922	0.464748		0.0192272	-0.120802	0.0416305	-0.816004	-0.797136	0.414122	-0.770266	0.818413	-0.209369	-0.430232	0.0730643	0.612946	0.351895	-0.40332	-0.766608	-0.784665	0.00653581	0.652418	-0.487068	0.378633	0.703232
213	-0.394164	0.991573	-0.765891	-0.27916	0.250855	-0.568733	-0.905325	-0.904072	-0.95713	-0.152206	-0.983547	-0.164786	0.274721	-0.943257	-0.815296	0.139402	-0.245459	-0.747282	-0.305183	-0.0945422	-0.133869	0.209529	0.20251	-0.776586	-0.955146	-0.762636	-0.837516		-0.228421	0.60745	0.0863811	0.0694834	0.157518	-0.997161	0.953113	-0.0497721	-0.363828	-0.576938	-0.598923	-0.352389	-0.0680239	-0.711713	0.986394	0.10669	-0.990257	-0.145617	0.826778	-0.896527	-0.189074
214	0.691	-0.999496	0.14802	0.973715	0.195154	0.569951	-0.126747	0.106881	0.422115	-0.0694834	-0.368048	0.579417	0.94626	-0.26938	0.766807	-0.582537	0.35963	0.392763	0.773812	0.431634	0.649928	0.318165	0.988653	0.328135	0.499104	0.467086	0.938416		0.0472286	-0.0783905	0.997818	0.890667	-0.346846	0.977488	0.968192	0.0876328	-0.260181	0.83021	0.976839	-0.977866	-0.895363	0.235894	-0.293479	0.534448	-0.583997	0.319864	-0.0286507	-0.482679	0.592205
215	-0.0833107	-0.955345	0.374846	0.142871	0.753273	-0.601265	0.23976	-0.824658	0.305726	0.0470941	0.615728	0.792934	-0.975856	0.862545	0.488153	0.479125	-0.468503	-0.254982	0.233996	0.402059	0.607251	0.570396	-0.155448	0.999786	-0.520942	-0.123427	0.850148	1	0.968277	-0.723869	0.988694	0.734377	-0.567305	0.601023	-0.990687	-0.163399	-0.0752958	-0.623376	0.735251	-0.35984	0.992301	0.447214	0.625574	-0.753367	0.994677	-0.662103	0.893888	0.650125	0.859328
216	0.2865	0.985502	-0.510011	-0.989359	-0.804626	-0.0219727	0.570215	-0.995096	-0.606492	0.288292	0.967075	-0.356588	0.861961	0.891827	0.480833	0.608358	-0.435905	-0.957179	-0.692898	-0.017043	-0.34876	-0.0946814	-0.252518	-0.930695	-0.800875	-0.228081	-0.997745	-1	-0.994602	0.551433	-0.210838	0.327292	-0.0456666	-0.995704	-0.971277	-0.473492	-0.916438	-0.42059	-0.446618	-0.944285	-0.968064	-0.170314	0.943858	0.0661811	-0.385317	0.107894	-0.986185	-0.489006	-0.997713
217	0.198249	0.94416	-0.593852	-0.383157	0.982363	-0.724558	-0.941424	0.0372083	0.459756	-0.138648	-0.260081	0.563418	0.67418	-0.943305	-0.0270172	0.773619	-0.468965	0.976351	-0.119089	-0.367235	0.478475	0.652133	-0.168365	-0.944053	0.806182	-0.07106	-0.886585		0.388972	-0.467719	0.925655	-0.957492	-0.968075	-0.856957	-0.911728	0.261733	0.233926	0.737154	0.999239	0.337226	0.880747	0.989277	-0.637097	-0.561883	0.204082	-0.403229	0.762278	0.373083	0.498421
218	0.19408	0.752577	0.231758	0.728628	-0.603081	-0.439236	-0.202797	-0.768532	-0.131068	0.985679	-0.901167	-0.0144912	-0.999989	0.85494	-0.88129	-0.0592179	-0.932888	-0.480709	0.887529	0.235997	-0.254493	0.903738	0.229612	0.94651	-0.896007	-0.500551	-0.763599		0.487712	-0.996504	0.914115	-0.424471	0.792201	0.986983	0.40302	0.923697	0.105786	-0.753068	0.175088	-0.999712	0.0856219	-0.955779	0.843062	-0.318326	0.42203	0.0382861	0.785237	-0.684514	0.862557
219	0.475965	0.771266	0.258736	0.365088	0.495072	0.998868	0.991846	0.459547	0.238172	0.555855	0.675975	0.973201	0.995878	-0.971211	0.726267	-0.618762	0.676271	0.975668	-0.603108	0.149003	0.526796	-0.144474	0.076167	0.972101	0.640675	0.184987	-0.555572		-0.338317	-0.769562	0.294404	0.751022	-0.304419	0.818732	0.930973	0.8438	-0.383814	0.779603	0.264898	-0.889984	0.894066	-0.227147	0.975178	0.473933	0.127701	0.232797	0.528945	0.759401	-0.989359
220	-0.398285	-0.882031	0.999695	0.466324	0.581238	-0.6	-0.118343	-0.352395	-0.198847	-0.923181	0.0490568	0.440984	-0.0756255	0.312618	0.0780742	0.899328	-0.555572	0.413316	-0.776864	-0.0879889	-0.915509	0.976731	0.0931603	0.965587	-0.575558	-0.716152	-0.999502		0.183705	0.99338	0.453403	-0.289672	-0.804344	-0.294086	-0.898516	-0.533993	-0.74012	-0.46014	0.508872	0.114866	-0.137492	0.983943	-0.801139	-0.555742	0.592157	-0.985999	0.998613	0.230466	0.988116
221	0.523435	0.977251	0.284509	-0.0643353	-0.128554	0.745899	0.069944	0.044629	-0.0191454	0.357137	-0.0233202	0.260717	0.258162	0.138942	-0.104467	0.167277	0.190947	0.0305668	-0.0910114	0.0419909	0.0705495	0.5022	-0.366908	-0.490755	-0.0736059	0.211673	0.243211	1	0.0672486	-0.417388	0.491412	0.332953	0.214777	0.0884451	0.258047	0.878911	0.180618	0.203954	-0.384276	-0.172397	0.0251253	0.0359532	0.453228	0.200857	0.131858	0.0556305	0.326088	0.314278	0.032615
222	-0.614529	0.0719778	-0.203916	0.0667203	-0.319793	-0.804288	-0.078218	0.508149	0.637708	-0.260716	0.101918	-0.282409	-0.526462	0.16137	0.29657	0.315305	-0.579088	0.231467	0.133375	0	-0.388885	-0.346781	0.074136	0.350273	-0.289692	0.0471787	-0.534831	-1	0.0873147	-0.00859259	-0.0416728	-0.147458	0.0874939	0.280087	0.0195275	0.348412	-0.159546	0.110792	-0.0770715	-0.126613	-0.346961	0.163799	-0.67391	-0.261986	0.00331124	-0.243048	0.144235	-0.402283	-0.246747
223	-0.698293	-0.180633	-0.462952	0.737215	0.36514	0.838349	0.434553	-0.840638	0.0524569	-0.133992	-0.805056	0.582063	0.718498	0.561501	0.571311	-0.877378	0.504402	0.774459	-0.499277	0.446517	0.328034	0.157744	-0.132811	0.999821	0.751246	-0.111445	0.996093		-0.346928	0.167595	0.395565	-0.632114	-0.923951	-0.617175	0.839153	-0.539564	-0.343947	-0.807913	-0.798609	-0.408265	0.970609	-0.147127	0.359508	-0.327057	0.995261	-0.291162	0.408481	-0.131209	-0.283242
224	-0.203419	0.768042	-0.0901025	0.122765	0.160993	-0.1021	-0.0443164	-0.152417	-0.447214	-0.222711	0.0169467	-0.114115	-0.378344	-0.248861	-0.0869119	-0.345882	-0.207504	0.299939	-0.236864	-0.158082	-0.337816	-0.223214	-0.107647	-0.722424	-0.440485	-0.0985865	-0.611574		0.0418329	-0.113753	-0.0457038	0.0278484	0.183581	0.14966	-0.64944	-0.204951	0.224204	0.132235	0.0797203	-0.847459	-0.638587	0.0218395	-0.0695428	0.177919	-0.0982485	-0.26817	0.932116	-0.496975	0.936762
225	0.00897831	0.615913	-0.470647	0.22732	-0.0161642	-0.405437	-0.333333	-0.182646	0.411889	0.126826	-0.0682344	0.0147913	-0.148779	-0.0474243	-0.325712	0.438259	0.124603	-0.530395	-0.32485	-0.0607301	-0.08972	0.0814446	-0.0120655	0.255077	-0.499089	-0.999745	-0.436099		0.133678	-0.135182	0.284541	0.603503	-0.383789	-0.301573	-0.748652	-0.734033	-0.961643	-0.394946	0.610968	-0.311346	0.0473402	-0.712652	-0.98103	-0.613759	-0.159616	-0.399082	0.00366298	0.499643	-0.0684779
226	0.504213	0.997937	-0.0231598	-0.0460039	-0.155542	0.954074	0.35865	0.284088	0.10008	-0.507148	-0.239223	0.367167	0.475007	-0.809241	0.775975	-0.722933	-0.959674	0.589527	0.0271282	0.210305	0.163682	0.697717	0.13503	-0.912698	0.843062	0.126422	0.995161		-0.344526	-0.425101	-0.228567	-0.75151	-0.987441	-0.711003	0.373434	0.996923	0.0115377	0.755556	0.311758	0.0567559	-0.548026	-0.0469281	0.436274	-0.987241	0.135506	0.127195	0.683586	-0.152057	0.612735
227	0.36283	0.993811	-0.107687	-0.0041322	0.688749	-0.112942	-0.0953717	-0.180652	-0.348626	-0.0940609	0.271266	-0.0678824	-0.167638	0.224727	-0.0405493	0.19649	0.0544645	-0.166082	0.993373	-0.0472555	-0.0904113	-0.132081	-0.188088	0.629458	-0.0471007	-0.100741	-0.334613		-0.0212718	0.129894	0.124166	0.558013	-0.271878	0.143736	-0.405415	0.257537	-0.239392	0	0.2822	-0.269055	0.459234	-0.0354701	0.172423	0.130423	-0.0797452	-0.143363	0.00898167	-0.062938	0.399998
228	0.6038	-0.408724	0.14796	0.878292	-0.999705	-0.327177	0.137301	-0.482605	0.539821	0.132164	-0.842468	0.0305534	0.649532	0.0280788	-0.181706	0.168671	0.211206	-0.962853	0.00737685	0.744569	0.567372	0.129552	0.492645	0.546574	0.792037	0.0891953	-0.1696		-0.262601	-0.164399	0.807332	-0.129131	0.629979	-0.438202	-0.154423	0.624076	0.0276392	0.124427	0.249466	-0.59814	0.37754	0.718418	-0.343762	-0.159232	0.715694	-0.417976	0.961524	-0.247796	-0.125774
229	-0.942335	0.876169	0.455982	-0.926501	0.0529759	0.0778301	-0.602239	-0.54913	-0.763655	-0.659053	-0.876529	-0.710109	-0.776821	-0.337936	-0.330177	-0.758509	0.587512	-0.845489	-0.705101	-0.53789	-0.911179	0.662198	-0.99301	-0.280344	-0.958056	-0.412137	-0.725182		-0.691223	0.777793	-0.335956	0.539666	-0.878251	-0.995473	-0.99836	0.61284	-0.947054	-0.655769	0.131494	-0.997619	-0.994475	-0.345957	0.204966	-0.834267	-0.935303	-0.280857	0.79702	-0.523103	-0.151562
230	0.656515	0.982565	0.340305	0.00564963	0.385932	0.278152	0.478414	-0.30743	0.994968	0.201057	0.291202	0.265111	0.598394	-0.0131683	0.32546	-0.966705	-0.0487665	-0.0547124	0.493013	0.313831	0.29354	-0.99846	0.1708	0.325789	0.574329	0.380264	-0.0800838		0.26172	0.27241	0.328848	0.355365	0.44845	0.558438	0.629085	0.144823	0.333245	0.388972	0.995717	0.168232	0.706166	0.14389	0.539578	0.376628	0.32075	0.33565	0.513553	0.239263	0.51513
231	0.975982	0.983158	-0.885116	0.126526	0.99238	-0.886458	0.120411	0.418341	0.430979	-0.347832	0.136253	0.348187	-0.0734209	-0.725754	0.264561	-0.914429	0.537098	-0.658505	-0.4557	-0.904326	0.0335945	0.110888	0.00314464	-0.548026	-0.227921	-0.368684	-0.675725		-0.51552	-0.970965	-0.382243	0.280286	-0.0395729	0.00462958	-0.80961	-0.755976	-0.639789	-0.999335	-0.0305668	-0.783179	-0.197283	-0.938994	-0.770394	-0.859943	-0.943939	-0.576895	0.707107	-0.569019	-0.892667
232	-0.0900927	0.0166297	0.0830455	-0.443922	-0.150851	-0.123897	-0.115595	-0.662315	-0.130348	0.433859	-0.683318	0.0134088	0.772034	-0.511039	-0.186291	-0.498569	-0.307462	0.48997	0.656537	-0.515204	0.574498	-0.382079	-0.255627	-0.525042	0.0480924	-0.998744	-0.624044		-0.212329	0.0823856	-0.484335	-0.355108	0.254054	-0.960875	-0.0800218	0.503871	-0.535873	-0.300929	0.177635	-0.875045	-0.422512	0.572182	0.718602	-0.316228	0.0730006	0.624695	0.983687	-0.246221	0.72813
233	0.839497	0.869209	-0.276343	-0.991355	0.762197	0.14737	0.179887	0.459756	-0.613657	0.252508	0.999838	0.846509	0.960471	0.992515	0.0391856	-0.519331	-0.0401974	0.59239	-0.369898	-0.316228	0.385593	0.461109	0.947755	0.999901	0.170662	0.780252	0.917983		0.582068	0.996764	-0.939178	-0.994379	-0.30971	-0.0461554	0.94601	-0.00583648	0.999912	0.746401	0.973392	0.00757554	0.561847	0.932798	0.734803	-0.488459	0.114953	-0.857493	0.846195	0.936914	0.824001
234	-0.977972	0.584658	-0.741425	0.336164	-0.108059	-0.680451	-0.337226	-0.451021	0.1486	-0.907527	-0.931801	0.274721	-0.813561	-0.999997	-0.621692	-0.909285	-0.27881	-0.343686	-0.086153	0.176149	-0.525387	-0.875094	-0.791151	-0.988648	-0.730066	-0.650973	0.725754		-0.978305	-0.96025	-0.989558	-0.746765	-0.962865	0.707107	-0.924064	-0.16392	-0.899061	-0.634057	-0.247171	-0.910302	-0.9582	-0.998141	0.124981	-0.838961	-0.44961	-0.971767	0.287348	-0.998999	0.259488
235	-0.717408	0.527825	-0.47741	-0.107581	-1	-0.819501	-0.539263	-0.0367399	-0.523745	-0.428324	0.017293	0.0919709	0.0797452	0.47016	0.360186	0.174208	-0.090754	-0.497526	-0.441508	0.320546	-0.158678	0.491063	-0.0432208	0.649243	0.0465514	-0.00585927	-0.367879		-0.29055	-0.23428	-0.463865	-0.668125	-0.460419	0.999704	0.121246	-0.299196	-0.527143	0.609405	0.9058	-0.497325	0.0419578	0.112666	0.0186014	-0.154691	-0.160848	-0.321342	0.214929	0.197596	-0.0595149
236	0.166118	-0.127256	0.16722	0.233694	0.225705	0.244877	0.0636848	-0.114778	0.0993743	-0.127339	0.133443	0.332856	0.271114	-0.0275258	0.00681415	0.00338408	0.155809	0.255679	0.7363	0.0603295	0.0160724	-0.498558	0.25645	0.165196	-0.131185	0.636047	0.129711		0.0687689	0.100355	-0.200396	0.493744	0.306751	-0.227956	0.246358	0.00564564	0.189949	0.394493	0.117912	-0.395861	-0.0965616	0.125479	0.366062	0.105039	0.248269	0.18334	0.0645928	-0.181021	0.540975
237	0.5676	0.096766	-0.0848603	0.00359926	0.86844	0.00915526	-0.198914	-0.166667	0.0151498	-0.0672535	-0.143363	-0.00282884	0.0638321	0.248836	0.0545686	-0.886267	-0.113012	-0.104055	-0.187022	0.0518674	-0.00860553	-0.0869338	-0.0223211	0.118561	-0.122491	-0.356122	-0.0802823		-0.244638	-0.142934	-0.377171	0.211797	-0.00397216	0.158517	0.00721766	-0.0807967	-0.110955	-0.10438	0.185964	-0.266674	0.0999026	-0.0884451	-0.558868	-0.113378	0.390057	-0.312778	0.066566	0.240607	-0.212986
238	0.290542	0.963953	-0.201653	0.166475	0.00763337	-0.889486	-0.0397755	-0.128789	-0.2205	0.0821952	0.282552	0.234579	-0.0442779	-0.414645	0.208242	0.0234629	0.115803	0.0592231	0.992007	0.129204	0.0423611	-0.0889757	-0.0457396	-0.193845	0.161312	0.253533	-0.0771503		-0.101816	0.0832442	-0.344473	-0.0254772	-0.229713	0.036121	-0.247696	0.3222	-0.0131184	0.0208288	0.284209	0.0516551	0.435396	0.0901212	0.328776	0.184144	-0.0847998	0.181425	0.005797	-0.100063	0.628925
239	0.941987	0.653033	0.640602	0.190581	0.573462	0.393919	-0.0859552	-0.994389	0.288874	-0.69381	0.136933	0.998146	0.364535	0.743219	-0.420725	0.785642	0.343193	0.519104	-0.316917	-0.0762798	0.980581	-0.618131	0.549178	0.996876	0.622641	-0.785971	0.97271		-0.8	0.823026	0.768702	0.385233	-0.754082	-0.160587	0.637085	-0.564684	0.59191	0.635271	-0.888778	-0.574494	-0.116519	-0.227962	-0.751165	-0.817943	-0.484808	-0.419395	-0.239782	-0.835133	-0.425491
240	0.84183	-0.553337	0.263639	0.197734	0.0463636	0.416422	-0.150176	0.132164	-0.521635	0.16968	0.201457	0.199762	0.643351	0.628626	0.351123	0.940732	0.188373	-0.0436646	0.537582	0.323643	-0.092073	0.34512	0.0905357	-0.567102	-0.401725	0.0797452	0.447699		0.0974363	-0.028492	-0.324458	-0.727167	0.322094	0.705344	0.261851	-0.468945	-0.107703	-0.0273508	0.182646	-0.607648	0.268413	-0.253028	0.316228	0.0749063	0.294765	-0.0243089	0.713809	-0.32188	0.996761
241	-0.998937	0.851151	-0.0612058	0.313843	-0.01293	-0.276263	-0.999936	0.937425	0.131878	-0.989517	0.480623	0.953686	-0.758075	-0.168369	0.485643	0.785193	-0.937502	0.604386	-0.184616	0.392597	0.479369	-0.999977	-0.517986	0.368665	0.287348	-0.0223408	-0.120503		-0.953828	-0.265481	0.146337	0.728152	-0.452339	-0.612293	-0.380167	-0.105958	-0.1439	-0.997833	-0.536337	-0.852601	0.912324	-0.99921	0.525766	-0.814084	0.847475	-0.994371	-0.612088	0.334765	-0.0859552
242	-0.707863	0.99495	-0.222776	-0.104545	-0.242536	-0.39746	-0.176924	-0.884465	0.174941	-0.0683085	-0.343103	0.28675	-0.846267	-0.203772	-0.133337	0.204072	-0.165193	-0.295807	-0.986764	-0.183487	0.0240768	0.0566829	-0.62133	0.92636	-0.673364	-0.0339939	-0.367864		-0.50532	-0.307209	-0.152351	-0.676989	0.0100801	-0.740351	-0.315286	-0.0227214	-0.515541	-0.0658679	-0.548489	-0.617957	-0.251385	-0.300266	0.187181	-0.0762338	0.0184105	-0.393189	0.091526	0.280044	0.29923
243	0.949757	-0.0722743	0.675725	-0.144111	0.164566	-0.379953	-0.0600419	0.296133	-0.665109	-0.337541	-0.835827	0.793051	0.214959	-0.0618966	-0.24388	0.127416	-0.0800989	-0.498124	0.0373339	0.00534752	0.270952	0.00950076	-0.398285	-0.837371	-0.979654	-0.489387	0.376476		-0.781233	-0.156054	-0.28658	-0.711057	0.877393	0.732674	-0.725464	-0.505617	-0.320937	0.738956	-0.405174	-0.518915	0.339382	-0.714751	-0.161435	0.247383	-0.639926	-0.720833	0.0720731	-0.568073	-0.204923
244	0.747978	-0.923742	0.813055	-0.113743	0.242536	0.410899	0.295434	-0.777854	0.506573	0.824729	0.937629	0.992034	-0.51611	-0.647197	0.205321	0.56921	0.879561	-0.359149	0.32631	0.261286	0.991265	-0.324813	0.348329	-0.181992	0.651431	0.271761	0.949926		-0.648947	0.992322	0.30646	0.640684	0.837492	0.998467	0.772034	0.999989	0.821516	-0.139644	-0.134976	-0.804366	0.971842	0.925813	-0.16264	-0.057175	0.735095	0.182269	0.0976841	0.833099	0.713229
245	-0.425797	-0.189057	-0.456115	-0.242536	0.208638	-0.092766	0.0551921	0.201104	-0.99816	0.977176	0.100368	0.999571	0.997317	0.988372	0.529595	-0.99173	-0.533846	0.0573766	-0.234818	0.855646	0.632871	0.11268	0.343193	-0.833953	-0.615602	-0.271635	-0.713938		-0.143126	0.36428	0.979798	-0.95588	-0.691311	-0.992402	-0.999774	-0.825258	-0.806766	-0.0975714	-0.104937	-0.935687	-0.969231	-0.321039	0.327054	-0.330056	0.0583619	0.267192	0.6258	-0.578898	-0.99835
246	0.280931	0.827181	0.339373	-0.648119	0.298388	0.390796	0.0396348	0.936519	0.188799	0.668402	0.758233	0.59455	0.174248	0.0314805	0.108578	-0.615271	-0.344418	0.182944	-0.0505845	0.115233	-0.834465	0.254398	0.0753911	0.688599	0.802166	0.167799	0.318244		0.0304568	-0.0466279	0.113991	0.742763	-0.252422	0.335223	0.560999	0.34797	0.094424	0.586997	-0.108811	-0.616308	0.659995	0.350608	0.360095	0.437969	0.307129	0	0.967487	0.150884	0.997341
247	0.723037	-0.562724	0.28939	-0.170522	0.500845	-0.33663	-0.226826	-0.388136	0.293358	0.0698291	-0.0752843	0.232023	-0.273612	-0.491792	0.336129	0.641546	-0.0199013	0.42184	0.80961	0.173785	0.300673	0.0463741	0.0773927	-0.489006	0.126096	-0.437136	0.217537		-0.268458	0.867724	0.956102	-0.623578	-0.574882	0.486659	-0.991858	0.906471	0.0215777	-0.334765	0.188292	-0.567473	0.0102209	0.0448528	-0.0545904	-0.332683	0.076243	0.0833073	0.462144	0.164399	0.0205181
248	0.797836	0.947938	0.140738	-0.0425405	0.374039	0.225596	-0.00865768	0.313938	0.289286	0.058187	0.137095	0.58925	0.651819	0.380035	0.125845	0.758317	0.0124795	0.154491	0.437944	0.12426	0.275782	0.0381887	0.206729	0.299072	0.31028	0.384806	0.272759		-0.0470941	0.219482	-0.267765	0.202745	0.0658169	-0.0960785	-0.00127307	0.48537	-0.0138395	0.305733	0.28282	-0.578671	0.296451	0.0889168	0.0831001	0.434357	0.132743	0.00710209	0.914013	0.204334	0.369224
249	-0.809099	-0.897614	0.176586	0.0353761	-0.214825	-0.361082	0.108664	-0.247024	-0.0857448	-0.193523	-0.166816	0.346499	-0.0309586	0.375816	-0.133773	-0.125019	-0.0824484	-0.551996	-0.239084	0	-0.291998	-0.152137	-0.663749	-0.299245	-0.112816	-0.664364	-0.236199		-0.184361	0.123421	-0.99958	-0.595055	0.0402217	-0.160231	-0.0100892	-0.183314	-0.214792	0.160752	-0.582302	-0.209803	0.0875454	-0.0619923	-0.289058	0.381968	-0.246635	0.0173174	0.395122	-0.476591	0.245042
250	0.87244	0.98675	0.938816	-0.752345	-0.337461	-0.429443	0.0761854	-0.212914	-0.761755	0.908454	-0.442888	0.762425	-0.857596	-0.0564284	-0.996952	-0.974339	-0.270831	0.0573766	0.557434	0.388701	-0.897668	-0.853346	-0.156385	-0.00909053	-0.452303	-0.0910488	0.932798		-0.294546	-0.764114	0.716664	0.815541	-0.33282	-0.586729	-0.845605	-0.802349	0.5547	-0.0742863	0.0901717	-0.990596	0.282945	-0.931948	0.647197	-0.99909	-0.699118	0.187112	0.639167	-0.730271	0.217195
251	-0.413803	0.974973	-0.893803	-0.067289	-0.966235	0.884918	0.699645	-0.688006	-0.996241	-0.758767	0.99824	0.241411	0.881785	0.580231	0.862829	-0.913462	0.901919	-0.40199	-0.115362	-0.574314	-0.571888	-0.94051	0.992877	0.581238	-0.978859	-0.130621	-0.597378		-0.887466	0.883395	0.905728	-0.979157	-0.794768	0.998999	-0.860292	0.98467	0.338719	-0.427484	-0.390468	-0.995814	0.433589	-0.985845	-0.508054	0.483361	0.515499	-0.983831	0.364179	0.510626	0.919958
252	-0.825521	-0.458903	-0.185844	-0.342874	-0.102029	0.0628128	0.0162065	0.0316941	-0.0521105	-0.322153	-0.199334	0.126891	-0.493101	0.888366	0.0220439	0.231344	-0.707107	-0.10947	0.0730438	-0.0705632	0.0908702	0.325991	-0.114947	-0.113175	-0.217795	-0.998724	0.127381		-0.00484647	-0.161022	-0.175521	0.439425	-0.561245	-0.905207	0.642268	0.0909674	-0.491466	0.102065	-0.349243	-0.634919	-0.0568009	-0.273384	-0.383015	-0.315549	0.102334	0.639435	-0.426523	-0.467972	-0.73994
253	0.885311	0.928293	0.144799	-0.546268	-0.27881	-0.446243	0.115789	-0.100104	0.12898	-0.121419	0.432255	0.841821	0.913873	-0.689943	-0.10934	-0.0134759	0.461133	-0.132743	-0.117747	0.0336133	0.205112	-0.317603	-0.0958205	0.579849	-0.415243	-0.126712	0.152661		-0.140376	0.0577811	0.583717	-0.296877	0.0876806	0.388972	-0.476023	0.352972	-0.0409413	0.0324313	0.00222345	-0.938641	0.189558	0.539607	0.0874299	-0.0444525	0.112155	-0.153043	0.670592	-0.143429	0.998471
254	-0.219787	0.983485	0.0164813	0.160657	0.0670844	0.798815	-0.779012	-0.0125935	0.106749	0.500177	0.0848415	0.63565	0.324619	-0.565254	0.353155	0.347154	0.0948091	-0.027621	0.0581265	0.288305	0.0535424	0.217568	0.141421	0.619865	0.117797	0.102843	0.106533		0.041314	0.209053	-0.662198	0.133598	-0.817537	-0.13768	0.298134	0.0918717	0.139206	0.0736134	0.208881	-0.0891414	0.347923	-0.0777344	0.386252	0.0670844	0.165423	0.12382	0.139772	0.360386	0.347314
255	-0.965294	0.999263	0.922194	-0.121749	0.203641	-0.513665	-0.83921	-0.862781	0.664541	-0.297715	-0.606043	0.413068	0.699625	-0.817645	0.0707897	-0.982006	0.468235	-0.251237	0.125365	0.357837	0.927644	0.686424	0.534883	0.902281	0.673962	0.279066	0.970664		0.42167	0.364998	0.176433	0.339644	-0.998168	0.808988	0.366372	0.106713	0.723869	0.873126	-0.0901294	-0.20414	0.709107	-0.935602	-0.402539	0.642438	0.934998	-0.11148	0.138471	-0.883462	0.690097
256	0.728068	0.966472	-0.338121	-0.854383	-0.512781	-0.389438	-0.686819	0.561974	-0.287348	-0.993751	0.162293	0.268799	-0.888198	-0.466547	-0.0525588	-0.00833304	-0.976575	0.0104889	-0.996347	0.0446921	-0.838198	-0.562114	-0.617822	-0.82103	-0.0725357	-0.839682	-0.816462		-0.509379	-0.529118	0.990142	-0.51006	-0.989567	0.974711	-0.266442	0.37626	0.0266403	-0.425797	-0.13408	-0.524729	0.104972	0.747409	0.211891	-0.430297	-0.65294	0	-0.0785741	0.918592	-0.638336
257	0.696089	-0.729376	0.642908	0.100783	0.317348	0.187171	-0.442956	0.055266	0.0833141	0.316228	0.537316	0.558954	0.953241	0.149984	-0.387567	-0.0750565	0.285749	-0.0644809	-0.114457	0	0.749716	0.0707443	0.964597	0.865946	0.866858	0.0698978	0.36526		0.368718	0.430499	0.219643	-0.387391	0.261286	-0.798118	0.0728953	0.590882	0.224692	0.387304	-0.571793	-0.584143	0.599356	0.261119	0.850052	0.406527	0.2032	-0.181095	0.75741	0.678098	0.626797
258	-0.402367	0.907774	-0.987167	-0.988817	-0.672673	-0.997034	-0.779257	-0.921009	-0.101043	-0.803237	-0.88248	-0.514496	0.954953	-0.776571	0.890724	-0.742593	-0.535894	-0.915644	0.242536	-0.775484	0.039968	-0.329148	-0.947665	0.958716	-0.601443	-0.691103	-0.912632		-0.817036	-0.987718	0.278604	-0.856456	-0.35576	0.999443	-0.610933	-0.989079	-0.607513	-0.931865	0.325205	-0.994847	-0.998264	-0.909669	-0.79055	-0.360217	-0.251634	0.292581	-0.999357	-0.886782	0.0689049
259	0.557884	1	-0.349906	-0.0372268	-0.021462	0.257902	-0.252704	-0.746956	-0.151701	0.0579831	-0.21874	0.273592	-0.281565	-0.360904	-0.0562327	-0.0595954	-0.177347	0.336336	-0.0576547	0.271885	0.198735	-0.602035	0.412077	-0.521087	-0.770067	0.0691115	0.0511378		0.107651	-0.344817	-0.101113	0.285278	-0.465915	-0.5326	-0.540447	0.172419	-0.986798	0.237491	-0.31957	-0.308777	0.13691	0.0479193	-0.125209	-0.205804	-0.996398	-0.0593124	-0.188467	-0.561547	0.29065
260	0.887376	0.98501	-0.402225	0.0528671	-0.448982	0.841178	-0.213077	0.338877	0.499926	0.117784	0.894427	0.868243	0.674738	-0.579361	0.21693	0.178424	0.346416	0.636677	0.262442	-0.0826351	-0.159689	-0.94116	-0.44132	0.809942	-0.235418	-0.0224468	0.899301		0.146549	-0.239714	0.36776	0.140566	-0.931641	0.695795	-0.983175	0.128827	0.0184206	-0.693942	0.885138	-0.643324	0.961041	-0.460317	0.878806	-0.450745	0.758146	0.188934	-0.319626	0.521198	-0.202537
261		-0.82412	0.235408	0.455721	0.139255	0.574282	-0.76508	-0.1328	-0.020352	0.998831	0	0.293758	0.975007	-0.60871	0.99851	0.893672	0.936792	0.355995	-0.184666	0.102317	0.535977	0.363478	0.875355	-0.99768	0.63683	-0.464549	0.818611		0.296805	0.998618	-0.0903387	-0.682382	0.0784095	0.655378	0.0598923	0.811134	0.0934666	-0.194416	-0.305219	-0.747698	-0.998897	-0.666603	0.865518	-0.606611	0.698605	0.858055	0.522708	0.557888	0.931243
262	1	0.931665	0.180894	0.319893	0.433371	-0.529999	-0.647328	0.366265	-0.403418	-0.412607	-0.178885	0.644741	0.783257	-0.877526	-0.0055452	0.727789	0.236205	-0.185607	-0.0719958	0.0557789	-0.412168	0.533993	-0.251398	0.81342	0.435693	0.515149	-0.172835		-0.240514	-0.44922	0.965161	0.539666	-0.960368	-0.815338	-0.937358	-0.875795	-0.654377	-0.0891953	-0.435236	-0.526244	0.897129	-0.589379	0.081836	-0.201395	-0.322674	0.427965	0.287348	0.479812	0.532092
263	0	0.995889	0.404791	0.667092	0.060313	-0.12558	-0.0258782	0.166109	0.0690111	-0.323381	-0.189754	0.391618	-0.730083	-0.328252	0.177708	0.0995037	0.00503772	0.290482	-0.391464	0.190752	0.620566	0.0533996	0.824729	0.550609	-0.193879	0.0367922	0.321666		-0.120887	0.10366	0.0196041	0.807152	0.306074	0.554009	-0.24725	0.0226571	0.544016	-0.139141	0.165236	-0.0348048	-0.072799	-0.0780223	-0.22723	0.11627	0.295976	0.0264225	0.105958	-0.24955	0.942699
264	-0.986556	0.0507119	0.497512	-0.730424	0.00570333	-0.611448	-0.539706	0.149805	-0.615644	-0.26491	-0.114897	0.996413	0.98005	-0.349382	-0.188847	0.00975563	0.605591	0.315368	0.471877	-0.934719	0.944986	-0.350964	-0.0503298	0.950352	0.25169	0.151745	-0.876331		-0.581715	-0.822897	0.250654	-0.142865	-0.767644	0.00366298	-0.672837	0.557007	0.223376	-0.295073	-0.0842069	-0.319251	-0.863297	-0.985165	0.907267	0.718857	-0.730877	-0.4183	-0.922862	-0.658505	-0.358979
265	0.986556	0.837166	-0.400142	-0.111544	0.722283	0.720174	-0.529437	0.618772	0.830489	0.896316	0.303075	0.868243	0.367209	-0.522487	0.990043	-0.94066	0.334177	0.279566	-0.486676	0.294955	0.281516	0.873508	0.36671	-0.438029	-0.120732	-0.0502267	0.651422		0.688855	0.381541	0.435979	0.846561	0.41276	0.996882	-0.955689	0.0429953	0.337201	0.455476	-0.725656	-0.687652	0.980233	0.95365	0.435561	0.630324	0.999574	0.475065	-0.220617	0.66594	0.363355
266	-0.995866	-0.882872	-0.206594	-0.103525	0.0812006	-0.0437292	-0.12427	-0.27137	-0.0431134	-0.315331	-0.203416	-0.0477654	0.31028	-0.17858	0.0721173	-0.271778	-0.485228	-0.0465046	-0.174507	-0.183913	-0.030329	0.317671	-0.433726	0.452979	0.373367	-0.0218412	0.0888044		-0.395709	-0.179981	0.366065	0.725378	-0.00381677	-0.982359	-0.608175	0.0641533	-0.309782	-0.0506481	-0.304499	-0.264574	-0.729977	0.167799	-0.318384	-0.415817	-0.161686	-0.76182	-0.563507	-0.374789	0.970143
267	0.995866	0.750037	-0.534711	-0.303252	-0.684994	-0.176068	-0.984531	0.18134	-0.249705	0.801746	-0.967037	0.650791	-0.0276817	-0.86496	-0.312438	-0.266474	-0.0236776	0.131589	0.128959	0.0796077	-0.85564	0.987518	0.996938	0.654609	-0.98226	0.155166	0.280414		0.262713	0.0170915	0.106647	-0.807391	-0.99199	-0.953108	-0.78015	0.956174	0.0244492	-0.0239166	-0.976737	-0.613432	-0.697015	-0.139173	0.403699	0.104083	0.565762	-0.271957	-0.117818	0.413803	0.471108
268		-0.148947	0.0952176	-0.894427	0.0978234	-0.385806	-0.999767	0.638401	0.436702	0.351123	0.974613	0.0956296	-0.862056	0.238983	-0.638107	0.920769	-0.00849828	0.759257	-0.0764044	0.21829	0.729537	0.903734	0.163907	-0.991772	-0.105655	-0.331663	0.0963242		0.0396799	0.947681	0.125821	0.857771	0.0154422	0.985599	-0.653736	-0.527137	-0.999939	-0.813485	-0.577738	-0.772114	0.918543	0.443462	-0.413121	0.544988	-0.234316	0.180143	-0.999193	-0.702771	0.177214
269	-0.92564	0.887794	-0.742838	-0.474917	-0.290826	-0.998168	-0.320228	-0.999201	-0.490261	-0.825544	-0.920331	0.040048	-0.79022	-0.11522	-0.998366	0.939793	-0.0539753	0.096766	-0.331559	0.664364	0.572182	0.875032	-0.591097	-0.994172	-0.211012	-0.0418044	-0.990779		-0.209529	-0.996073	0.242346	-0.096517	-0.739029	-0.856573	-0.988977	0.421111	0.960104	-0.214979	-0.779578	-0.804433	-0.281364	-0.943312	0.143721	-0.329504	0.200396	-0.218711	0.18459	-0.65237	0.0612346
270	0.341421	-0.209172	-0.863014	-0.609356	0.598348	0.544594	-0.267005	0.116033	0.763386	-0.382228	0.0956052	-0.150798	-0.334164	-0.0529059	0.867106	-0.945373	-0.33372	0.138989	-0.0774631	-0.159486	-0.374719	-0.757538	-0.365898	0.938343	-0.399229	-0.194191	0.570298		-0.336336	-0.913231	0.410346	0.981598	-0.427168	0.6083	-0.591852	-0.520551	0.889757	0.573668	-0.610882	-0.968162	-0.157115	0.712741	-0.967075	-0.722308	-0.97394	-0.29769	-0.488792	-0.166651	0.507536
271	-0.830951	0.905421	0.818994	0.81274	0.576455	-0.695136	0.438202	0.794358	-0.824638	0.459151	-0.071247	0.724899	-0.274721	0.11141	0.940603	-0.442381	0.785269	0.801011	0.0965004	0.335188	0.846233	-0.917877	0.170662	0.436904	0.275949	0.306363	0.339644		0.965429	-0.128243	0.765021	-0.182908	0.863188	0.966667	-0.847998	0.927789	0.44402	0.966459	-0.553131	-0.898217	0.996413	0.866823	0.957769	0.627033	0.512228	0.420861	-0.319041	-0.442424	0.643238
272	0.952123	-0.808893	-0.207293	-0.159867	0.580956	0.632127	-0.0173218	0.604984	0.21183	0.121319	0.396387	0.228191	0.998186	-0.0529759	0.0632645	-0.19408	0.468671	0.657788	0.583096	0.322462	0.295976	-0.874299	0	-0.136823	-0.220505	0.132432	-0.0394949	1	0.214116	0.396499	0.549328	-0.796338	-0.355995	-0.898768	0.373793	-0.950309	-0.00376645	0.579056	-0.216281	-0.57553	-0.475517	0.208108	-0.106192	0.00634505	0.48208	0.509802	-0.323762	-0.572434	0.996905
273	-0.969441	0.74916	-0.0433588	-0.0173887	-0.163691	0.807279	-0.00258397	-0.119359	0.0907631	0.0875563	0.295493	-0.0473776	0.15916	-0.494363	0.0361605	0.174407	0.0915517	0.296032	0.186633	-0.171387	0.179336	-0.888919	0.90883	-0.332897	0.129745	0.0663317	0.469155	-1	0.207147	-0.0507104	0.125303	0.626704	-0.843134	0.88415	0.0594971	-0.428042	0.0866296	-0.964039	-0.986891	-0.583271	-0.149664	-0.00151976	0.443262	-0.380294	0	0.0964932	0.102029	0.529782	-0.227147
274	0.324272	-0.964711	-0.224295	-0.319195	-0.00826418	-0.597405	-0.395272	-0.303372	-0.21829	0.0784095	-0.157763	0.0250757	-0.170349	-0.257336	-0.307003	0.147197	-0.146107	0.0658466	-0.144252	0.510411	0.153707	-0.88435	0.540529	-0.427089	-0.0724761	-0.0255433	0.140431	1	-0.0637903	-0.0989879	-0.0982467	-0.337302	-0.411226	-0.102531	0.00371055	0.0727454	-0.0316371	0.152057	-0.250033	-0.456202	0.171872	0.100221	-0.444745	0.348712	0.14768	0.0958529	-0.474012	0.186142	-0.10681
275	-0.914398	0.937883	0.584673	0.460734	0.939123	0.0296899	-0.646742	0.137986	0.546268	0.95876	0.313016	0.885712	0.733728	0.99999	0.571064	0.995979	0.866186	0.852223	0.146036	-0.858113	0.535778	-0.99983	0.407678	-0.0119991	0.233641	0.0221859	-0.386049		0.855059	0.705937	-0.00187309	-0.948683	0.267644	-0.927441	0.994327	0.483262	0.975536	0.333421	-0.474746	-0.0830455	0.999972	0.565231	0.667998	-0.936903	0.186976	0.287593	0.558376	-0.723356	0.71719
276	0.9891	0.909926	-0.0169878	0.455006	-0.0626969	0.494466	-0.704026	0.271192	0.688105	0.292835	0.155538	-0.0191965	-0.61007	0.69238	0.561803	0.337556	0.156011	0.470588	-0.0565465	0.244628	0.766635	-0.888992	0.0875531	0.500827	0.208571	-0.469849	0.748269	-1	-0.0767855	-0.165133	-0.258353	0.678559	0.0312348	0.0877657	0.245393	0.562031	-0.304019	0.0365456	0.341279	-0.272482	-0.307973	0.092165	-0.572928	0.0237839	0.16411	0.211535	0.0716671	0.524256	-0.180422
277	-0.982769	0.770752	-0.999457	-0.959002	0.131795	-0.911493	-0.990387	-0.999977	0.283107	-0.979772	-0.215936	-0.289324	-0.955299	-0.999052	-0.348046	-0.962213	-0.925352	-0.361321	-0.613283	-0.581238	0.717738	-0.886018	-0.992597	0.985484	-0.564593	-0.251088	-0.919465		-0.967201	0.162207	-0.495396	-0.394262	-0.885576	-0.528006	-0.897582	-0.9193	-0.903738	-0.253847	-0.933982	-0.935555	0.804176	-0.618997	-0.964154	-0.111968	-0.820163	-0.760565	0.0359832	-0.999664	-0.382602
278	0.435497	-0.997872	0.452679	0.993753	0.187353	0.240102	-0.282064	0.0767816	0.255538	0.411046	0.116841	0.204632	0.214382	-0.293654	-0.320904	0.225987	0.312321	-0.0052956	0.0563158	0.102249	0.658729	-0.194238	0.333318	-0.276241	0.265197	0.848945	0.256255		0.0661677	-0.316228	0.481156	0.0366353	0.613715	0.56218	0.194274	0.256582	0.0189587	0.565211	0.0118372	-0.0199627	-0.152959	0.0307547	0.618944	0.0403095	0.126072	0.191553	-0.0167404	-0.264845	0.497828
279	0.999196	0.999976	-0.484697	-0.920967	0.968855	-0.257371	0.22504	0.300341	0.0614394	0.205612	0.377382	-0.130588	0.473637	-0.742774	-0.465237	-0.157744	0.0287839	0.781157	0.0844431	-0.177561	-0.593852	-0.0302188	-0.619916	-0.517652	-0.100528	0.328817	0.490454		0.21803	0.677558	0.0110578	-0.0686059	-0.531109	0.502527	0.0831985	0.952773	0.985212	0.769169	-0.59239	0.0479154	-0.215358	0.571834	-0.656035	-0.369698	0.313728	0.0168588	-0.192928	-0.130334	0.320054
280	-0.991323	-0.975807	-0.362532	-0.999208	0.0958138	-0.640023	-0.66049	-0.995954	-0.913707	-0.846316	0.381032	-0.456278	-0.748188	-0.467888	0.156349	0.223499	-0.827895	-0.0706197	-0.190477	-0.135809	0.458065	-0.677613	0.392439	0.795432	-0.515347	-0.139071	-0.642893		-0.680022	-0.468454	0.192588	-0.365088	-0.638301	0.0732294	-0.716568	-0.679266	0.109602	-0.977582	-0.762584	-0.599741	0.42914	-0.282066	-0.26963	-0.13972	0.0101175	-0.0668249	-0.355313	0.446359	0.563683
281	0.880905	-0.998588	0.0378641	0.0129859	-0.0472753	0.205749	-0.483423	-0.162073	-0.0924746	0.654849	0.67291	0.433926	0.975097	0.600522	-0.0347013	0.018835	0.711826	0.191088	-0.136539	0.417664	0.160975	-0.271034	0.248116	-0.732456	-0.00597599	0.123699	0.260066		0.130865	0.308091	0.190182	0.691033	-0.0287088	-0.406385	-0.0945742	0.150661	0.5184	-0.463128	0.126873	-0.21068	0.483775	0.0373303	-0.130976	0.577236	0.555441	0.73994	0.0418169	-0.32447	-0.272399
282	-0.829972	-0.220277	0.814036	0.56515	0.855537	0.930242	-0.468545	0.29623	0.0371805	0.790377	0.442189	0.421923	-0.647648	0.42565	0.802696	0.707107	0.0215777	0.966729	0.383717	0.313782	0.0200763	0.929961	0.402597	0.903738	0.626391	0.433402	0.979126	1	0.927891	0.759962	0.0943021	0.429146	-0.588986	-0.416345	-0.892934	0.28544	0.577032	0.868539	0.988964	0.721273	0.538542	0.33732	0.504263	0.813733	-0.253713	0.419058	0.674633	0.407332	0.717786
283	0.990561	0.851961	0.582112	-0.417293	0.256333	0.459556	-0.360122	0.306531	0.749518	0.515293	-0.105704	0.524097	0.456165	0.622663	-0.893348	0.849707	0.305726	0.815058	-0.25723	0.920523	-0.669249	-0.781973	0.846392	-0.369907	-0.89578	0.0288342	-0.263117	-1	-0.93686	-0.316228	-0.0350741	0.94036	0.180962	0.985145	-0.702388	0.708353	0.348187	-0.391862	-0.236744	-0.969748	-0.998509	-0.639118	0.775892	0.532921	-0.384302	0.655894	-0.766905	0.92689	0.868712
284	-0.999847	-0.998987	-0.39122	-0.155493	0.613941	-0.615424	-0.724766	-0.774984	0.892994	-0.969769	0.874682	0.226513	-0.99297	-0.985248	0.366062	0.917179	0.990257	-0.961137	0.419138	-0.974732	-0.931382	-0.999046	-0.850683	0.98046	-0.00584785	-0.437807	-0.996281		-0.498471	-0.691341	-0.153406	0.958661	-0.820728	-0.643762	-0.992278	-0.309427	-0.431455	-0.821798	-0.240052	-0.971469	0.950079	0.994781	-0.594265	-0.714359	0.999975	-0.280229	-0.596703	-0.639071	-0.943372
285	0.555921	-0.812871	-0.284719	-0.272894	-0.723208	0.29526	-0.999849	-0.0488546	-0.392704	-0.0969438	0.309586	0.298837	-0.223126	-0.404926	-0.304009	-0.514984	-0.112575	-0.395909	-0.587285	-0.249519	-0.464088	-0.243125	-0.143705	-0.398444	-0.959495	0.164399	-0.274721	1	-0.297006	-0.306773	0.852161	-0.781509	-0.420656	-0.239207	-0.323229	-0.236724	-0.210556	0.51626	0.203692	-0.0538141	-0.519501	-0.253569	-0.734673	-0.222661	0.213077	0.0824434	-0.186988	-0.999924	-0.0189539
286	-0.737465	0.968942	-0.377777	-0.397942	-0.305629	-0.973258	-0.716194	-0.376329	-0.516133	-0.181162	-0.20414	-0.530307	0.237154	0.104798	-0.314036	-0.768738	-0.175732	-0.66244	-0.0173887	-0.0392842	-0.643361	-0.0821509	-0.407218	0.0266895	-0.642257	-0.406698	-0.886977	-1	-0.351123	-0.308139	0.0509207	-0.844131	-0.125252	-0.26085	-0.808834	-0.0792759	-0.541409	-0.0369067	-0.482091	-0.755745	-0.555501	-0.196844	0.900159	0.157309	-0.345516	0.521715	-0.487233	-0.737232	0.103193
287	0.78028	-0.989497	-0.0391005	0.966196	0.13916	-0.460645	-0.418632	0	-0.642716	0.46296	0.115674	-0.195608	-0.273152	0.0151082	0.1054	0.370451	0.26144	0.247203	0.351455	0.781947	0.493756	-0.281724	-0.120867	0.338866	-0.0514289	0.024002	0.484295	1	-0.118376	0.168652	0.0963967	0.760351	-0.635316	-0.0229297	0.0682168	-0.988023	0.405206	-0.0663722	-0.13958	-0.0263067	-0.435979	-0.251948	-0.253502	-0.147107	0.0922184	0.644055	-0.341405	0.0986543	0.826744
288	0.899034	0.706182	-0.920155	-0.966235	0.99485	0.837798	-0.792699	-0.848157	-0.0809658	0.0451666	-0.345705	-0.223144	0.990675	0.979804	0.836639	-0.760867	0.602964	0.643192	0.87129	0.417449	-0.929872	0.936329	0.367843	0.949037	-0.896112	0.441568	0.999856	-1	-0.485254	0.925705	0.740697	0.812586	-0.789352	-0.185408	-0.807626	0.798234	-0.355857	0.318734	-0.0636292	-0.809066	0.819606	0.334319	0.811129	-0.805814	0.706083	0.425665	0.391987	0.380337	0.666331
289	-0.493579	0.0695983	0.361352	0.162961	-0.179509	-0.0649157	-0.74903	0.152389	-0.19734	0.194261	-0.164035	-0.419254	0.424119	0.458574	-0.120455	0.373072	-0.207335	0.0139456	-0.104108	0.368958	-0.0940189	0.473261	-0.192289	0.0542059	-0.0659578	0.0292915	-0.0307341		-0.592551	-0.236744	0.780133	-0.897192	-0.338719	-0.598403	0.256632	0.14404	-0.206361	0.114734	-0.406512	-0.00536665	0.893388	0.497587	-0.256516	0.442575	0.094136	0.193278	-0.341884	0.0776701	0.130384
290	0.964089	-0.663992	-0.169673	-0.400298	0.386368	0.346759	-0.476283	-0.687011	0.219389	0.930052	0.990621	-0.921682	-0.969211	-0.978791	-0.984398	-0.999963	0.0765634	0.804468	0.407991	0	-0.99997	0.184289	0.276429	-0.495589	-0.953583	-0.122775	0.987763		-0.612572	0.955064	0.998892	-0.967129	0.782238	0.999611	-0.517709	0.381411	0.0559467	0.334207	-0.234607	-0.891464	-0.873926	0.146938	0.606075	-0.8856	0.893518	0.290199	-0.986757	0.523874	0.343224
291	-0.45412	-0.542444	0.806851	-0.818657	0.913244	0.564029	-0.99941	0.0788313	-0.0462061	0.617983	0.329921	-0.626975	-0.0536539	0.83005	0.795509	0.592076	0.633724	0.294937	-0.961006	-0.0812961	0.906079	-0.0832831	0.998674	0.0535314	0.0882964	0.727283	-0.127289	1	0.0616472	0.191739	0.870876	-0.301492	0.659092	0.810615	0.509802	0.819232	-0.173997	0.46166	0.952151	0.0780088	0.569633	-0.416041	0.941742	0.571985	0.982872	0.295755	0.369895	-0.130535	0.202379
292	0.066519	-0.108385	-0.0553088	-0.230624	0.537666	0.51261	-0.302402	-0.096723	-0.536033	0.15893	0.592712	-0.730497	0.411952	0.377014	0.581238	-0.31896	0.822453	0.290741	0.365483	0.678855	0.741218	0.245642	0.501499	0.87904	-0.201573	-0.888265	0.492171		0.395251	-0.631137	0.319552	0.72366	-0.583696	-0.462889	0.821564	0.0550014	0.265391	0.983067	0.0136739	-0.407701	0.303739	0.577498	0.406435	-0.344124	0.102521	0.900123	0.997074	-0.236488	0.559103
293	0.537392	0.951103	-0.803987	0.174543	-0.238286	-0.857247	-0.464582	0.205596	-0.990181	-0.207816	0.284088	-0.294086	0.870661	0.979877	-0.591806	-0.590351	-0.786893	0.50041	-0.923077	0.951709	0.974613	-0.493756	-0.0651575	-0.99723	0.127971	0.98559	-0.951005		-0.924678	0.316228	0.111637	0.989877	0.989799	0.963252	0.738242	-0.975976	0.316228	0.929682	-0.0572828	-0.386444	-0.865083	-0.302357	0.375959	0.984059	-0.151044	0.786853	0.536875	0.885084	-0.0284438
294	0.965012	-0.327432	0.387399	0.786435	0.354344	-0.304296	-0.377981	0.707107	-0.0177837	-0.196116	0.087167	-0.817414	0.974366	0.190995	0.0337645	0.998309	0.688844	0.335399	0.992008	0.334457	0.898646	0.125932	0.0636462	0.970091	0.232744	0.084039	0.299178		-0.844131	-0.00223713	0.0522844	0.833209	-0.445547	-0.459056	0.953381	-0.973465	0.302103	0.991882	0.168022	-0.781398	0.325139	0.0549891	0.986924	-0.98854	0.778953	0.570065	-0.448939	0.0990368	0.999098
295	0.945569	0.999833	-0.099203	-0.186307	-0.187001	0.923157	-0.87615	0.0368171	0.0313653	0.00837959	-0.169979	-0.191479	0.48392	0.195275	0.627816	-0.723163	-0.116658	-0.534813	-0.0532993	0.0488624	0.389727	-0.0453562	-0.594843	-0.631879	0.0537595	0.119749	0.0575287		-0.339265	-0.0719975	-0.974116	-0.44622	-0.39291	-0.414797	0.108996	0.361528	-0.0411912	-0.421983	-0.213504	-0.541867	-0.268324	0.090099	-0.537734	-0.248971	-0.381173	0.0656987	0.186901	-0.317994	-0.489407
296	-0.900079	0.773611	-0.189629	0.295867	0.237482	0.191077	-0.369694	-0.320596	-0.133065	-0.233215	-0.0484467	-0.153574	-0.370745	-0.0835775	-0.536475	-0.124883	-0.0526875	-0.171707	0.944605	-0.255535	0.124875	-0.0345283	-0.291692	0.138213	-0.26745	-0.0262585	-0.226699		-0.13508	-0.341907	0.118427	0.189262	0.0171796	0.421516	-0.0319503	-0.191157	-0.0823638	0.127324	0.0422303	-0.527757	0.0780981	0.0410135	-0.133475	-0.0317894	-0.102715	0.141189	-0.253374	0.282713	0.178015
297	0.562362	-0.650546	0.254343	0.029315	0.175289	-0.215257	0.148871	0.0515618	0.0353532	-0.17238	0.0190048	0.1157	-0.223985	0.396943	0.505225	0.246963	0.0479601	0.0363396	-0.390455	0.123875	0.600166	0.013342	0.131454	0.466047	0.0546867	0.550868	0.0973446		0.0256682	-0.286122	0.117835	-0.274458	0.0013986	-0.389955	-0.0891953	-0.0115721	0.0160446	0.212628	0.0690655	-0.0787025	-0.0762961	-0.0840893	0.0980967	-0.145355	0.100649	0.171253	-0.141113	-0.114191	0.0843188
298	-0.618162	0.891758	-0.16663	0.0473046	-0.167764	0.0783256	-0.0608698	0.0674139	0.169376	0.166266	0.109307	-0.179221	-0.239699	0.232696	0.0749141	-0.137589	0.0803016	-0.0149936	0.086905	-0.118235	0.415017	0.0406363	0.00106044	-0.480833	-0.0247029	0.22626	0.00672128		-0.104491	0.105667	0.117683	0.00551336	-0.316473	0.107462	-0.137153	0.232008	-0.0276244	0.327432	-0.210289	-0.223063	-0.0947702	0.090693	0.644013	0.317867	0.0317198	0.0284947	-0.0340189	-0.355547	-0.0386309
299	-0.88453	0.217023	0.737805	0.43014	0.747262	0.208018	-0.995618	0.257023	0.0538636	-0.665371	-0.10913	-0.552346	0.757067	0	-0.965114	0.265929	-0.250158	0.866355	0.614372	0.058722	-0.357498	-0.256598	0.279931	0.124546	0.68622	-0.245659	-0.446205	-1	0.15906	0.14627	0.357137	-0.741896	0.520428	-0.119946	-0.338916	0.343582	-0.157309	0.807511	-0.497512	-0.546093	-0.185735	0.335381	-0.936182	0.0976177	0.37258	0.39512	-0.493228	0.743226	0.574356
300	-0.503871	0.176381	-0.298275	-0.42472	0.014597	0.661355	-0.533091	-0.671404	0.780577	0.831293	0.957826	-0.973038	0.805566	0.0749763	0.722977	-0.459958	0.833932	0.491321	0.438509	0.109208	0.460687	-0.83746	-0.0900845	-0.986816	-0.726504	0.225448	0.86455	1	-0.686624	0.805056	0.772038	0.982537	-0.767393	-0.801592	-0.855422	-0.758092	-0.201653	0.818116	0.21693	-0.710047	0.987377	0.939561	0.459141	0.269327	0.6587	0.732617	0.848806	-0.760298	0.579698
301	0.670629	-0.952407	0.170513	0.340736	0.0165582	-0.135809	-0.0653454	0.679501	0.119303	0.0912309	0.2517	-0.137383	0.517847	0.253117	-0.028086	0.937113	0.556367	0.346938	0.0830455	-0.045188	0.339941	0.396163	0.478363	0.504439	0.266619	0.388908	0.205484	-1	0.36951	0.0234128	0.147807	-0.31316	-0.284059	0.369015	0.305857	0.513275	0.470588	0.618245	-0.0706026	0.163101	0.222038	0.181632	-0.13171	0.54992	0.192957	0.960128	0.139313	-0.307689	0.0361645
302	0.608714	0.562911	0.110432	0.14253	0.391504	-0.415607	-0.343214	-0.110882	-0.17192	0.0122583	-0.0362631	-0.07485	0.168992	-0.114926	0.15057	-0.0783113	-0.132164	-0.328462	-0.41495	0.154627	-0.333216	-0.0438028	-0.914013	-0.248779	-0.0898549	-0.0565617	0.223248	1	-0.158993	-0.16024	-0.0917303	0.337101	0.0212024	0.0797452	-0.0503887	-0.0657912	-0.0314053	-0.11374	-0.532338	-0.391914	-0.0737249	-0.116294	0.0752577	-0.139744	0.146467	0.0213892	-0.101425	0.361756	0.128594
303	-0.151697	-0.466878	-0.401035	0.710929	0.359402	0.421864	-0.196901	-0.05986	0.0241065	-0.161035	-0.0590965	-0.163948	-0.267491	0.175197	0.550528	0.15681	-0.0270837	0.188394	0.332164	0.962247	0.298441	0.335325	0.638336	0.103984	0.232786	0.0607186	0.11594	-1	-0.111823	0.202025	-0.293564	0.688938	-0.387028	0.376226	0.395277	-0.36815	-0.0520278	-0.245247	-0.606673	-0.277375	0.0222497	0.00115207	0.42738	0.138021	0.401295	0.645199	0.0198966	-0.346801	0.847509
304	0.721988	0.924303	0.0843932	-0.924086	-0.764911	-0.509138	-0.950549	-0.126367	-0.152504	-0.436492	-0.305726	0.0197145	0.155876	-0.329834	-0.318558	-0.97629	-0.0733314	-0.638313	0.160071	-0.956727	-0.494729	-0.339044	-0.601039	0.632686	-0.502894	-0.123615	-0.378633		-0.479472	0.320314	-0.965395	-0.11076	-0.815995	-0.222966	-0.537352	0.962745	-0.158562	0.290857	-0.658729	-0.839754	-0.659927	-0.127394	-0.614994	-0.215842	-0.553312	0.137092	-0.456852	0.346555	-0.554228
305	-0.949289	0.900633	0.21243	-0.393523	-0.122575	0.112773	-0.403889	-1	0.116061	0.319316	-0.437193	-0.407783	-0.71841	-0.935509	-0.104792	0.994738	-0.127522	-0.160623	-0.368243	0.99885	0.760521	0.108204	-0.372702	-0.753861	-0.0957124	0.0295253	-0.873608		-0.366759	-0.231856	-0.238148	-0.521257	0.680681	0.759018	-0.669697	-0.994802	-0.409249	-0.349925	-0.497367	-0.825021	-0.476283	-0.32642	0.762153	-0.420539	-0.63139	0.588957	-0.828927	-0.770138	0.306277
306	-0.987763	-0.161446	-0.914085	0.745781	0.878195	-0.711387	-0.293885	-0.23811	-0.202686	-0.397687	-0.883529	-0.87491	0.99443	-0.556036	-0.984702	-0.646522	-0.153387	-0.816024	-0.0237514	-0.221621	-0.0140091	0.495408	-0.12758	-0.783328	-0.89252	-0.983472	0.591364		-1	-0.218238	-0.600864	0.724375	-0.961455	-0.969586	0.436461	0.324324	-0.264195	-0.229945	-0.0612484	-0.998433	0.840121	0.370924	-0.586865	-0.214407	-0.523223	0.683941	0.678382	-0.0204039	0.893404
307	0.989245	0.705165	0.269218	-0.122801	0.60232	0.449973	-0.317837	0.304233	0.394196	0.728682	0.911238	0.0312999	0.0289733	0.672475	0.327942	0.245109	-0.523634	0.113256	0.251316	0.498744	0.316228	-0.263117	0.315783	0.20024	-0.99587	0.0768453	-0.594265		0.736049	0.424503	0.0553585	-0.936164	-0.50702	-0.24018	0.994441	0.720535	0.523824	0.723356	-0.274944	-0.852253	-0.466652	-0.134985	-0.30091	0.948058	0.132869	0.866331	0.916307	-0.143373	-0.536985
308	0.841157	-0.964864	0.0456146	0.110432	0.500045	-0.147225	0.292838	0.37716	0.116748	0.265107	0.356122	0.0344623	0.405625	0.144447	0.200827	0.1784	0.405501	0.29133	0.146141	0.0178543	-0.0466993	0.15379	0.0796866	-0.394171	0.205709	0.210081	0.175324	1	0.126927	0.257851	0.0509807	0.206245	0.180232	-0.311901	0.0844431	-0.185078	0.102899	0.0764215	-0.695421	-0.19492	-0.0941535	0.215046	0.292368	0.0306649	0.0262168	0.448964	0.222957	0.410365	0.0212503
309	0.954836	0.395966	0.7845	0	0.973523	0.114469	-0.353727	-0.421223	0.608384	-0.671048	0.0766965	0.436112	0.97858	-0.865031	0.103805	-0.497278	0.0524392	0.0619923	0.000820344	0.912509	0.449728	-0.404164	-0.300424	0.973103	-0.9944	0.0741448	-0.863779		-0.547768	-0.160255	-0.0234311	0.0977213	0.0547564	-0.533993	0.106755	0.523661	0.90134	0.655818	-0.0629773	-1	-0.8221	-0.991342	0.301131	0.32401	0.917179	-0.0670531	-0.514496	-0.629652	0.367659
310	-0.743464	-0.179781	0.824696	0.571227	-0.086275	0.519741	-0.265456	0.0401974	0.278115	-0.0865684	-0.262325	0.339107	-0.30446	-0.998406	-0.216727	0.542889	-0.221621	-0.0598923	0.236823	0	-0.293387	0.154466	-0.233011	-0.92558	-0.258969	0.708632	-0.385216	-1	-0.0393138	-0.00330031	-0.851082	0.15154	-0.676331	0.39353	-0.355755	0.999963	-0.325315	0.294324	-0.248375	-0.100931	0.998786	0.017679	0.418184	0.0974663	-0.935159	0.348083	0.0111725	0.132794	0.572342
311	0.743464	0.693442	-0.20601	0.994469	0.899189	-0.411336	-0.0655862	0.258797	0.154505	0.0739902	-0.974634	0.841178	-0.456031	-0.573685	-0.395458	-0.394511	0.327719	-0.8643	-0.215388	0.271914	0.135719	0.762677	0.980862	0.722272	0.485643	0.137924	0.0860988		0.400056	-0.367547	0.162845	-0.14249	-0.451285	0.69713	-0.384208	-0.285167	0.145741	-0.273983	0.0212035	-0.826982	-0.985821	0.213167	-0.198706	0.223751	0.513468	0.757236	0.754934	0.277654	0.32641
312		0.126864	-0.881542	0.792624	-0.842824	-0.497278	-0.328932	-0.378105	-0.273828	-0.280326	0.668965	-0.121847	-0.780183	-0.765474	-0.868243	0.572901	-0.741776	0.859102	0.460082	-0.58612	-0.974229	-0.995429	0.157269	-0.997779	-0.86894	-0.502136	-0.966097		-0.99613	0.208236	-0.122871	-0.660974	-0.999994	-0.977247	-0.844314	-0.995623	-0.323688	0.365244	-0.942682	-0.740189	0.942739	-0.154377	-0.495264	-0.861727	-0.146254	0.957256	-0.983153	0.399074	-0.0121203
313	-0.933346	0.946169	-0.517519	-0.995463	-0.766192	-0.845892	-0.432199	0.390831	-0.585707	-0.955195	-0.291701	-0.955731	0.184796	-0.0544853	0.724776	-0.981005	-0.00787377	-0.998488	-0.825117	-0.488917	-0.895243	-0.988455	-0.601115	0.99612	-0.379626	-0.955914	-0.913952		-0.953342	-0.875173	0.0259851	-0.771373	-0.408044	0.85882	-0.641657	-0.0775436	-0.683686	-0.0948091	-0.310912	-0.914882	-0.948816	-0.990214	-0.300635	-0.645942	-0.915004	0.545155	0.998721	-0.612918	-0.970977
314	0.933346	0.988103	0.121148	0.821468	0.422076	0.642466	-0.173703	0.107277	0.00886883	0.5547	0.0208288	-0.41552	-0.0982872	-0.880893	-0.309037	0.141421	-0.654283	0.303882	0.411533	0.970299	-0.736888	0.152057	0.343404	0.162889	-0.130798	0.681419	0.494772		-0.106426	0.601006	-0.125342	0.644793	-0.475248	-0.92919	-0.64002	-0.885448	0.0461048	0.884918	-0.397405	-0.991129	0.701464	0.648608	-0.940887	0.625001	0.231755	0.743032	-0.0439988	0.97116	-0.773707
315		-0.257663	-0.154714	-0.187022	-0.198847	0.418419	-0.167069	0.327915	0.00964275	-0.229214	0.28939	-0.588789	0.95165	0.701458	-0.399502	-0.1766	0.408959	0.144051	-0.103572	0.892566	-0.0151069	0.187651	-0.0238223	-0.963454	-0.70055	0.0850897	0.300617		-0.177153	-0.403572	0.00910087	-0.324596	0.0582949	0.982872	-0.987791	0.435226	0.776439	0.0558338	-0.136303	-0.903069	0.334089	0.0852589	-0.449858	-0.607841	-0.541437	0.780198	0.495853	0.65278	-0.291569
316		0.99109	0.624081	0.326327	0.152419	-0.318581	0.0261504	0.105137	-0.151929	-0.252786	-0.071247	0.22486	0.108059	0.290088	0.486818	0.332049	-0.231515	-0.219587	0.337414	0.0467807	0.229385	0.165231	0.00769701	0.862453	0.304776	-0.0115934	-0.290396		0.104192	-0.184448	-0.630343	0.0233676	0.199332	-0.507414	-0.543328	-0.085514	0.208938	0.312576	-0.936021	-0.195789	-0.0543038	-0.281059	0.285606	-0.298165	-0.0946814	0.0308806	0.327111	0.254815	0.610875
317			-0.769289	-0.0477922	0.453926	0.669459	-0.40523	-0.520212	-0.614852	-0.523708	0.362969	0.162542	-0.624071	0.476153	-0.149212	-0.417617	-0.268876	0.46356	-0.989053	0.464549	0.0105257	-0.119933	0.0890446	-0.677309	0.247282	0.00420922	0.68149		-0.444367	-0.0798964	0.0717644	0.933903	-0.177347	0.378309	-0.894427	0.6	-0.299464	0.526673	0.0973714	-0.917722	0.190022	-0.1952	0.27146	0.969483	0.106704	0.98358	-0.22486	-0.22298	0.649615
318		0	0.857493	0.309952	-0.458934	-0.972362	0.311728	-0.21264	0.997716	-0.862465	-0.733905	0.284415	0.805418	0.725953	0.543895	-0.812384	-0.372688	-0.345705	0.618997	0.0838162	0.631701	-0.849903	-0.982197	-0.998989	-0.406851	-0.112391	-0.996394		-0.515662	-0.0198636	0.259973	-0.973227	-0.99609	-0.750391	-0.963196	0.861616	-0.127394	-0.212236	-0.575779	-0.570237	0.9999	0.122238	0.163868	-0.91964	0.932139	0.0507367	-0.860475	0.59779	0.74371
319	0		-0.144666	0.106762	0.385952	0.206844	-0.111005	0.107482	-0.110723	0.325021	-0.0631517	0.13075	0.0816046	-0.96721	0.0191571	-0.190524	0.075818	0.0906342	-0.0128841	0.151631	0.0389049	0.144957	0.397392	-0.0302891	-0.408302	0.180273	0.034016		0.313799	0.0627691	-0.293771	0.284771	0.217942	0.0166644	0.0952176	-0.0656023	0.0701199	0.405401	0.328792	-0.228291	-0.127058	0.186531	0.206055	0.260716	0.202438	0.102046	0.201191	0.0327555	-0.567172
320	0	0	0.079491	0.229777	-0.634838	-0.918335	-0.314546	0.253158	0.0644106	-0.392829	-0.194729	-0.100385	-0.386436	0.0566004	0.184344	0.0642383	-0.279443	-0.129294	0.30206	-0.0750565	-0.0379473	-0.244761	0.384283	-0.521352	-0.431455	-0.296209	0.0525096		-0.237197	-0.459141	-0.0888028	-0.281286	-0.504028	0.313047	0.196707	-0.0330646	-0.241591	-0.157747	-0.0143703	-0.173432	0.028142	-0.388765	0	-0.312716	0.23701	0.219839	-0.195021	-0.385281	0.898093
321			-0.0422387	-0.416198	0.956869	0.810117	0.270306	-0.54846	-0.0415614	-0.0581538	-0.0516107	-0.725101	0.339758	0.206463	-0.166651	0.0479448	-0.569865	-0.516493	0.220521	0.282752	0.631534	0.0934855	0.455111	0.387159	-0.786644	0.945589	0.147987		-0.161881	-0.0582343	-0.999817	-0.34617	0.357332	-0.0353477	-0.0974531	-0.280121	0.265574	0.987947	-0.275648	-0.579421	0.771068	0.208972	-0.101742	-0.443661	-0.963673	0.132653	0.767169	0.239223	-0.447214
322		0	0.995815	-0.555241	-0.303999	-0.630415	-0.412329	-0.870109	0.321766	-0.9393	-0.887458	0.15182	0.918385	0.185188	0.761939	0.954636	-0.996317	0.619738	-0.458619	0.737805	-0.343714	-0.066519	-0.369527	-0.918484	-0.63914	-0.0266217	-0.587045		0.85494	0.542827	-0.137427	0.693442	-0.682583	-0.936211	-0.924678	0.549696	-0.886527	-0.335685	-0.189195	-0.973647	-0.90031	-0.773957	0.938292	0.648608	0.974814	0.258797	0.0858883	0.26533	0.930783
323			0.280487	0.192311	0.23707	-0.297604	-0.0598101	0.374194	0.238788	0.230738	0.0691617	0.201653	0.497686	0.521821	0.0162745	-0.0958819	0.274721	-0.103157	-0.192223	0.038016	0.161379	0.116597	-0.154022	-0.172647	-0.157991	-0.0425147	0.117084		0.0302891	-0.127308	-0.0200103	-0.496366	0.233709	0.331276	0.206959	-0.0395412	-0.133807	-0.212919	-0.34677	-0.496341	0.482344	0.0635655	-0.0436601	0.20645	0.0329787	0.212914	0.221814	-0.314195	-0.396846
324			0.6	0.637649	-0.269316	0.824932	-0.129339	0.296075	0.769562	0.0972236	0.156581	0.317007	-0.36137	-0.432836	0.109737	-0.362213	-0.910899	-0.152336	-0.62852	0.600804	0.145631	0.172135	0.315524	0.838496	0.075939	0.300105	-0.319713		0.451008	0.689293	0.931243	0.868864	0.05547	-0.837611	-0.148091	-0.650043	-0.115171	-0.303411	-0.948314	-0.464389	-0.621119	-0.0955997	0.484524	0.102496	0.514905	0.384182	-0.94987	0.621343	0.511432
325			-0.748997	0.378991	0.388189	-0.765016	-0.145689	0.891709	-0.0364996	0.932266	0.263742	0.0211717	-0.83205	0.604025	-0.676222	0.954364	-0.607998	0.0619497	0.529244	0.59051	0.0549974	0.616882	-0.568386	0.597011	-0.370656	-0.319757	-0.734303		-0.958168	-0.428226	0.0685518	0.979951	-0.82595	-0.813194	0.598289	0.689993	0.435561	0.136352	-0.22423	-0.927972	0.286206	-0.303204	-0.209231	-0.147439	0.644009	0.940676	0.940015	-0.772311	0.990723
326			0.0449705	0.162589	-0.166821	0.071247	0.0711459	0.11352	0.223164	-0.165451	0.188969	0.160009	-0.459895	0.993645	-0.0741277	-0.795652	-0.111736	-0.170577	-0.388343	0.0269071	0.0552152	0.159755	0.248606	-0.706334	-0.277307	0.0821818	0.335325		0.0401531	-0.150043	0.692225	-0.342552	-0.0213544	0.0503708	-0.33323	-0.169115	-0.161817	0.200317	0.869783	-0.283135	0.481006	0.292041	0.282276	0.144777	0.137166	0.182317	0.196675	-0.154898	-0.0134057
327		0	0.171464	0.314929	0.300879	-0.208684	0.0579831	-0.144732	-0.130114	0.0975061	0.0793088	0.152358	0.580114	-0.260371	0.0814773	0.363905	-0.0371425	0.0813472	0.204921	0.238177	0.00468653	0.0545977	0.194435	-0.493914	-0.125764	-0.0502159	0.166882		-0.0671488	0.206149	-0.240664	0.979141	0.469222	-0.27388	-0.351464	0.148935	-0.0533221	0.137099	-0.0727917	-0.375443	0.100511	-0.228872	-0.0765015	0.087865	-0.0880191	0.134783	0.0900486	0.323166	0.0182298
328		0	-0.929648	-0.991944	-0.425797	0.582169	0.415338	0.063344	-0.313289	-0.128895	0.106279	-0.113801	-0.978012	0.228622	-0.187797	-0.838213	0.0499376	-0.612609	-0.163385	0.236352	-0.763386	-0.460645	0.0934521	-0.711465	-0.917604	-0.0261776	-0.682227		-0.248845	-0.699504	0.0249922	-0.999008	-0.713398	-0.693109	-0.499521	-0.443958	-0.117599	-0.721245	0.391807	-0.542847	-0.317608	-0.474905	-0.949615	-0.59239	-0.999157	0.0409295	-0.0731821	-0.999976	-0.440373
329		0	0.334218	0.38203	-0.336772	-0.0812285	-0.199651	0.0826044	0.173669	-0.223591	-0.758133	0.25223	0.650625	-0.0417657	0.345295	0.0355016	0.0834088	0.306265	0.105161	-0.00919803	0.0542677	-0.300105	0.538389	0.827217	-0.266202	0.153707	-0.0686059		0.132164	-0.106953	-0.347173	0.35499	0.328012	0.522055	0.0691617	0.400031	0.15365	-0.202744	-0.0795886	-0.287616	0.229535	0.145278	-0.420021	0.413084	0.993307	0.462871	0.0147043	0.997667	-0.487625
330			0.0172885	0.0438175	-0.225677	-0.178145	0.0706197	-0.305359	0.716995	-0.0959014	-0.0805177	-0.0558472	0.214824	0.451359	-0.0746515	-0.405391	-0.22299	-0.179854	-0.191739	0.196529	-0.300305	0.160476	-0.278687	0.0439248	-0.142287	-0.162465	0.199552		-0.0668303	-0.149702	-0.810849	-0.415524	0.206277	0.536321	-0.00072098	0.694622	-0.135295	-0.19821	-0.301709	-0.452502	-0.279495	-0.0641077	0.367069	-0.048677	-0.392882	0.00595228	0.0803085	-0.601937	0.137153
331		0	0.553383	0.442817	0.066519	0.667199	-0.0823638	-0.839005	-0.483077	-0.994484	0.297384	0.240708	0.876092	-0.731825	0.0740991	0.99978	0.546143	0.828942	0.631818	0.949689	-0.172148	-0.447214	0.294497	-0.84937	-0.0154356	-0.615644	0.79017		0.349943	0.395687	-0.118171	0.791849	-0.511654	-0.994323	-0.687492	-0.859661	-0.460005	-0.725138	-0.222776	-0.954107	0.921635	-0.993108	-0.959487	0.0212718	0.645942	0.586382	0.278524	0.97205	0.871696
332		0	0.350761	0.434383	0.0809437	-0.651133	-0.382243	0.623698	0.724451	-0.302579	0.12262	0.171092	-0.64613	-0.947254	-0.0860433	-0.245005	-0.341907	0.438157	-0.0263514	0.198979	0.243714	-0.220826	-0.315733	0.259586	-0.154437	0.23918	-0.0635965		0.222209	0.00691228	-0.690829	-0.643143	0.0312673	-0.778562	-0.495737	0.337952	0.0508947	-0.0017452	-0.00380225	-0.489348	0.136687	0.33035	0.00481535	0.00699284	0.783708	0.490122	-0.13976	0.33245	0.299697
333			0.137078	0.4245	-0.109093	-0.327149	0.0783409	0.0637846	0.568057	0.557746	0.366459	0.715411	0.499462	0.307525	0.113059	-0.532018	0.0311464	0.0522163	-0.000690608	0.132249	0.234818	0.205321	0.266076	0.46638	0.0575965	0.324324	0.104564		0.185586	0.170346	-0.835144	0.534894	0.0123171	0.414764	-0.398055	-0.0457687	0.112647	-0.579798	0.722756	-0.117671	0.351649	0.0574087	0.432092	0.513707	0.371391	0.142611	0.150085	0.194121	0.26791
334		0	0.13738	0.445805	0.25389	0.42389	0.210014	-0.109133	-0.184331	-0.319846	-0.434453	-0.185725	0.0458846	0.938455	-0.169621	-0.335862	-0.198059	-0.340636	-0.153776	0.0897827	0.081088	-0.316538	-0.153124	-0.619378	-0.356085	0.0891852	-0.137707		0.032877	-0.0171333	-0.550727	-0.164399	-0.387889	-0.589802	-0.612378	0.0972808	-0.253791	0.10978	-0.143478	-0.482421	-0.0291453	-0.185492	0.0772976	-0.193737	0.705854	0.179038	-0.215233	-0.408339	-0.124843
335			-0.985383	0.834192	-0.682118	0.27159	-0.226601	-0.0161269	0.721105	-0.143994	0.463018	0.515184	-0.537699	-0.638135	0.600375	0.788117	-0.249487	0.797898	0.141228	0.263582	-0.0578375	0.0633645	0.914054	0.972268	-0.610094	-0.14834	0.55963		0.683067	-0.542369	-0.385122	0.531207	0.9875	0.927829	-0.714459	-0.93282	-0.291162	-0.229871	-0.216555	-0.213286	0.372959	0.637941	-0.0606846	-0.0558338	0.987506	0.406675	0.570396	0.643923	0.99595
336			0.535925	-0.325395	0.338003	-0.767481	-0.654931	-0.552982	-0.188117	-0.304296	-0.575427	0.0306957	0.997506	-0.10106	0.338899	-0.623739	-0.0557169	0.497026	0.250015	0.999957	0.202732	0.80708	-0.485951	0.084331	-0.226445	0.158085	0.501386		-0.0298671	0.765261	-0.485643	0.316228	0.284294	0.782508	-0.658505	0.728806	-0.177936	-0.275978	0.00510942	-0.98581	0.197425	-0.971329	-0.00612233	0.515246	-0.996835	0.497512	0.357789	-0.153922	0.813892
337	0	0	0.0325693	0.162915	-0.938302	-0.0465815	-0.272022	0.0918235	0.83957	0.467121	-0.444615	0.0326167	-0.216563	-0.936913	-0.28129	0.717171	-0.327022	-0.164167	-0.275509	-0.0793303	-0.0543238	0.306323	-0.391464	0.541497	0.165014	-0.0802336	0.0287946		-0.312033	-0.317886	-0.472763	-0.808644	0.360262	-0.928149	-0.639789	0.0155825	-0.0241688	-0.250803	-0.127423	-0.632311	-0.735313	-0.072047	0.81577	-0.312577	0.994612	-0.953231	-0.204343	0.416392	-0.476176
338	0		0.170799	-0.206755	0.888218	-0.178667	-0.308687	-0.182386	0.0511843	-0.137632	-0.34141	0.105895	0.147684	-0.219839	0.113681	-0.519431	0.100828	0.143796	0.00691069	-0.130394	-0.0575353	0.0677596	-0.585491	-0.506582	-0.108209	-0.147454	-0.209214		-0.207906	-0.360503	-0.925712	-0.312128	-0.42125	-0.578887	-0.221103	0.0314482	-0.0737735	-0.289212	-0.0400784	-0.169795	-0.229236	-0.256914	-0.78213	0.06413	-0.284702	-0.00697333	-0.103533	0.0573675	-0.175763
339	0		0.0353082	0.49954	-0.881185	0.0611101	0.260909	0.501961	0.619404	0.0940373	0.58651	0.182089	0.447976	-0.999195	0.0785741	-0.113078	-0.863014	0.0623783	0.428128	0.381357	0.174282	0.0560048	0.681191	0.847201	0.209262	0.18414	0.0368171		0.411188	0.0282715	-0.217424	0.556476	-0.0780645	0.593051	0.646555	0.98853	0.259129	-0.311177	0.201302	-0.341904	0.66702	0.157552	0.411982	0.179854	0.358791	0.445798	-0.0928691	-0.173909	0.226406
340		0	-0.593701	0.840297	0.63997	-0.274319	0.988073	0.250301	0.210041	-0.993324	0.0262205	0.729119	0.56741	-0.999496	-0.0823638	0.327832	0.351123	-0.404016	0.281882	-0.0384331	0.317886	0.281602	0.928268	-0.999957	-0.310054	0.775066	0.295449		0.300136	0.732911	-0.643791	0.0681145	0.295251	0.0119039	0.288008	0.835061	0.0637521	0.240805	0.566777	0.181302	-0.502174	0.88198	0.548963	0.488781	0.340321	0.472625	-0.518546	0.693796	-0.800227
341			0.130608	0.883737	0.490726	0.740612	0.116929	-0.111968	0.215108	0.45781	-0.392026	0.639932	0.61709	-0.836372	0.502309	0.864175	-0.347867	0.26223	-0.0717	-0.98387	-0.0687416	0.22539	-0.283017	0.629824	0.341279	0.655956	0.0443024		0.468716	-0.538746	0.0501194	0.815956	-0.175791	-0.931515	-0.791782	-0.683586	0.0656963	-0.0819156	0.27146	0.14834	0.509301	0.124514	-0.0659717	-0.822305	0.960868	0.925143	-0.115249	-0.489304	0.862763
342		0	0.890835	0.138742	-0.105601	-0.0888856	-0.136264	0.947066	0.101723	0.992579	0.578304	0.718322	0.856064	-0.189896	0.998605	0.871894	-0.313112	0.151689	0.0272008	0.716191	-0.331677	0.238275	-0.20743	0.99594	-0.782037	-0.223252	0.228712		0.355995	0.671519	-0.216185	-0.363828	0.569039	0.963157	0.995825	0.694735	0.340649	0.28984	0.0641859	-0.999442	0.832866	-0.341743	0.974965	-0.217341	0.820034	0.920702	0.0395729	-0.539695	-0.280899
343			0.410572	-0.152057	0.263445	0.418164	-0.193235	-0.274721	0.0662159	0.858438	-0.984301	0.916822	0.88562	-0.928477	-0.438761	0.805056	0.147824	0.300989	-0.305147	0.976744	0.828724	0.819454	0.456589	-0.738313	0.999808	0.0388057	0.438835		-0.0227645	-0.314263	-0.405885	-0.99806	-0.60478	0.760995	-0.522829	-0.989229	0.905158	-0.919145	0.17098	0.79022	0.0961905	0.485365	-0.612741	0.0389315	0.710799	-0.128185	0.594265	0.951709	0.866333
344			-0.867943	-0.0183303	0.0825574	0.138165	-0.564815	-0.0110797	0.0241726	-0.655936	-0.0648527	0.00194742	0.360554	-0.469037	0.210323	0.122715	-0.308505	-0.00265251	0.458735	0.043996	-0.145129	-0.205465	-0.0381402	-0.0244161	-0.192297	0.617287	-0.00665543		-0.456406	0.0577851	-0.71972	0.689266	0.0230118	-0.761185	-0.321388	-0.368328	-0.154136	-0.332504	0.397607	-0.526877	0.0167108	-0.0922153	0.521921	-0.157003	-0.347633	-0.00451667	-0.140345	-0.158541	-0.210374
345	0		-0.961815	-0.0567803	0.22758	-0.0940553	-0.359204	-0.00524927	0.999753	-0.0222617	0.242874	0.587359	-0.958226	0.99083	0.0338407	-0.522382	-0.138322	-0.439927	-0.141853	-0.171956	0.351967	0.0622763	0.134898	-0.667304	-0.38867	0.0479378	-0.336225		-0.409301	-0.615047	-0.998835	-0.290904	-0.483437	0.856548	-0.574512	-0.104365	0.0683754	-0.211291	0.135028	0.359232	-0.492057	-0.154286	-0.6932	0.23976	0.124035	-0.132094	-0.203066	0.0826181	-0.310255
346	0	0	-0.996972	0.132753	0.849966	0.369737	-0.325554	-0.279142	-0.170103	-0.568463	-0.642779	0.239737	0.999713	-0.594021	-0.403183	-0.217866	-0.392985	-0.122376	-0.450858	0.346139	0.247173	-0.126367	0.109541	0.0824919	0.00609745	-0.138163	0.348476		0.0239166	-0.0560521	-0.110572	-0.125973	0.060913	0.141421	0.434483	0.390149	-0.162132	-0.266525	-0.269696	-0.754411	0.373573	-0.0691769	-0.368515	-0.676602	-0.0120341	-0.0306873	-0.369957	-0.509413	0.386804
347		0	-0.996085	0.779455	-0.94896	-0.274721	0.00478463	0.204617	-0.151234	-0.887755	-0.175791	0.933746	-0.524889	0.698324	-0.514496	-0.922669	-0.162113	-0.331993	0.479567	0.279889	0.755494	-0.147619	0.0536488	0.33616	-0.168444	-0.187112	0.612824		0.852119	-0.794671	-0.471287	-0.957722	-0.494167	-0.90224	0.0919871	-0.785778	0.203567	0.957508	0.114706	0.0805455	0.861061	-0.137371	0.563455	-0.468433	-0.805193	-0.137886	-0.659189	0.630866	0.18071
348		0	-0.985537	-0.447214	0.137728	0.554286	-0.998194	0.19802	-0.936771	-0.889841	-0.719739	-0.667811	-0.888538	-0.999805	-0.988565	-0.975296	-0.849138	0.96373	0.992763	-0.322674	-0.678666	-0.279415	-0.969129	-0.998408	-0.558884	-0.379353	0.270298		-0.968697	-0.992947	-0.271816	-0.998319	-0.264935	0.998593	-0.816805	-0.920731	-0.360994	0.386345	-0.537084	-0.498201	0.963778	-0.810821	0.0502012	0.906183	-0.995864	-0.104383	-0.0101005	0.801627	0.997143
349			-0.388526	0.423975	0.9014	-0.205552	-0.111757	0.282009	0.998646	-0.621064	-0.741034	-0.0165267	0.7132	-0.079482	0.340926	0.309157	0.24036	0.115807	-0.638336	0.158719	0.250831	0.641025	0.297147	0.457206	0.551928	0.119638	0.536347		-0.265559	0.128789	-0.890737	0.858377	0.00803833	-0.4134	-0.142431	0.98676	-0.827217	0.846355	0.120147	-0.620805	-0.151095	0.242003	-0.946086	0.139037	0.0196683	0.627579	0.423904	-0.791891	0.633297
350			-0.800701	0.813352	0.486241	-0.892048	-0.814487	-0.199774	-0.894427	-0.993016	-0.605146	0.999628	0.97056	0.419952	0.795829	0.366913	-0.989477	-0.0791625	0.168227	0.0312348	-0.899037	-0.60349	0.35169	0.787452	-0.706016	-0.0102184	0.0681863		0.419196	0.0118686	-0.112668	0.902481	-0.0516955	0.481357	-0.786318	-0.975179	0.243675	-0.355825	-0.0135879	-0.868919	-0.155563	0.0270781	0.810331	-0.2356	0.861305	0.181868	-0.389946	-0.39635	-0.179839
351	0		-0.0682368	-0.303466	0.0125275	0.985664	0.132164	0.245957	0.998718	-0.193182	-0.355821	0.459854	0.585988	0.254715	0.528482	-0.867307	-0.0092162	0.37619	-0.142487	0.389122	-0.496962	0.446628	0.305822	-0.878614	-0.448982	0.152996	0.853911		0.150923	-0.111657	0.61582	-0.464007	0.570174	-0.829244	0.295924	0.974517	-0.105268	0.0796235	-0.708209	-0.481468	0.660047	0.703885	0.458745	-0.155575	0.30086	0.328277	0.050146	0.184796	0.0710451
352	0	0	0.0548999	-0.124843	0.22723	-0.987299	0.829496	-0.188946	-0.552919	0.757353	0.239618	0.176068	0.237488	-0.0268851	0.286098	0.231981	-0.0889628	0.0406848	0.433395	0.0155623	0.13466	0.486188	-0.166137	-0.0808159	-0.137136	-0.109929	0.283552		0.2697	0.287962	-0.0607186	0.924234	0.074949	-0.490878	0.853866	-0.724472	0.389238	-0.407373	0.425974	-0.204441	-0.269149	0.462002	-0.0172601	0.512741	0.329412	-0.287348	0.486053	0.0497265	-0.136719
353			0.903278	0.793606	-0.71867	-0.207859	0.0174392	-0.576057	0.861934	-0.422885	-0.920858	0.481187	-0.685094	-0.421731	-0.997657	-0.940099	-0.107963	-0.965018	-0.672673	-0.732608	0.0739596	-0.53319	0.181009	0.99885	0.216119	0.155238	-0.849407		-0.660686	-0.807459	-0.0734015	-0.504542	-0.896922	0.683705	0.497987	0.761939	-0.926814	0.791663	-0.095784	-0.751711	0.447214	0.822192	-0.6872	0.6	0.883788	-0.05547	-0.758542	-0.988261	-0.928241
354			0.609288	-0.0410964	0.775424	0.724626	0.674217	-0.297715	0.929682	0.329747	-0.193922	0.986858	0.993409	-0.691905	0.969915	0.694323	-0.231314	0.843227	0.201938	0.982788	0.941791	0.416311	0.539263	0.21243	-0.965716	0.563638	0.470775		0.927261	0.983415	0.249649	-0.577131	0.98723	0.302002	-0.103784	0.261415	0.349382	0.899657	0.0480509	0.129339	0.707107	0.986695	0.970448	-0.250567	0.483204	0.901613	0.89252	0.863069	0.784301
355			0.232932	-0.261851	-0.679359	-0.536385	0.649486	0.144713	-0.175894	0.250195	-0.967923	-0.934002	-0.441077	0.448307	0.383303	-0.954084	-0.365343	-0.518681	-0.986071	-0.72782	-0.838213	-0.374405	-0.518881	0.0819156	-0.953799	-0.779484	-0.568955		-0.7282	0.344712	-0.481299	-0.584305	-0.965616	-0.803984	-0.653826	-0.912763	-0.267173	-0.939064	-0.991128	-0.749667	0.968147	-0.583671	-0.998763	0.529999	-0.919145	-0.320596	-0.708941	-0.888768	-0.997669
356			0.0965345	0.0967447	0.0703382	-0.0226642	0.105735	0.227275	-0.00279524	0.619477	0.0826853	0.303604	-0.154784	-0.949051	-0.250116	0.337773	-0.246659	-0.0473434	0.0831143	-0.0643823	0.0613077	-0.131519	0.0932204	-0.37262	-0.156876	-0.269797	0.1568		0.0451646	0.141973	0.316909	-0.278605	0.193922	0.662035	-0.538887	0.476183	-0.186141	0.20046	-0.124426	-0.317392	-0.016101	-0.0247129	0.997414	-0.0413123	-0.192012	0.162194	0.276413	0.0422159	-0.0313021
357		0	-0.0693274	0.280223	0.338543	-0.0493902	0.0372083	-0.366445	0.144077	-0.052668	0.229551	-0.0664659	0.583487	0.0762014	0.349499	0.318377	0.0136548	0.427272	0.241232	0.211297	-0.252634	0.1849	-0.180856	0.545871	-0.0152838	0.556022	-0.00223463		-0.0873837	-0.16706	0.924326	0.356245	-0.175791	-0.168924	-0.153236	0.0361683	0.0792479	-0.136572	0.196116	-0.297048	0.466958	-0.038827	-0.99997	0.104304	0.475547	0.441221	0.0697058	0.178614	0.313656
358			0.22091	-0.708235	-0.599513	-0.931008	0.0714162	-0.407783	-0.513343	-0.242536	0.318972	0.26611	-0.137412	-0.999733	-0.208881	-0.482227	-0.981163	-0.199411	-0.0876348	0.6807	-0.348908	-0.346347	-0.372429	-0.69212	-0.201034	0.221944	0.0138875		-0.259898	0.0131815	0.199579	0.383736	-0.27133	-0.969803	-0.648082	-0.0424755	-0.187197	-0.738798	-0.0125214	-0.302244	-0.845654	0.255789	0.746333	-0.183098	-0.294377	0.34287	-0.141421	-0.629468	0.0515188
359	0		-0.17876	-0.00267022	0.873386	0.648755	0.288672	0.0683676	0.0504557	-0.287556	0.042068	0.294431	-0.445365	-0.556391	0.0309542	0.0945182	-0.15563	-0.247737	-0.0121111	-0.372921	0.077273	0.00986794	-0.0109433	0.218861	-0.192823	-0.132096	-0.0972118		0.00727547	0.217887	0.274721	0.767302	-0.230981	0.687019	-0.344614	-0.0529729	0.165959	0.339352	-0.813733	0.026169	0.0405073	-0.16838	-0.87606	-0.122361	0.00601493	0.0916913	-0.242315	0.279948	-0.54343
360	0	0	0.308893	0.829657	0.452279	-0.192302	0.36042	-0.0788399	0.160853	0.297339	0.0152267	0.603638	0.722642	0.660773	0.0617377	0.185569	-0.96977	-0.157792	-0.202145	0.993116	0.468157	0.266278	-0.563055	-0.862434	0.126798	0.427006	0.217435		0.204896	-0.2729	0.155336	-0.0649513	-0.0512838	-0.999267	-0.363825	0.112109	0.237089	-0.29547	0.157038	-0.165374	-0.0510044	0.28135	0.946464	0.899702	0.144248	0.163993	-0.136303	-0.608276	0.729187
361	0	0	0.942455	0.824988	0.965948	-0.824295	0.638124	0.496481	0.977051	-0.98768	0.707107	0.958762	0.444504	0.697565	0.983589	-0.986814	0.156304	0.980935	0.278148	0.523874	0.888621	0.985521	0.861344	0.955326	0.330056	-0.142124	0.636463		0.150537	0.3912	0.147174	-0.676849	-0.729156	0.999531	-0.112307	0.191857	-0.872353	0.884385	0.205215	-0.747629	0.718496	0.174298	-0.568676	-0.448552	0.866593	0.990492	0.281947	0.711868	0.331879
362	0	0	0.200396	0.248638	-0.316951	-0.0810245	-0.158609	-0.239286	-0.0971304	-0.264628	-0.410129	0.162191	-0.422812	-0.225235	-0.156768	0.87759	0.0303465	-0.259157	0.0753991	0.837826	-0.0646485	-0.295818	-0.359211	-0.140634	-0.371391	0.126358	0.0446482		-0.15059	0.117276	-0.0037076	0.819646	-0.035086	0.134172	-0.305927	-0.0302891	0.141202	-0.399706	-0.0554132	-0.735287	-0.715647	-0.0435949	0.820328	-0.397163	-0.426466	-0.484815	0.254649	0.699656	-0.206623
363			0.999713	0.320005	0.610728	-0.393616	0.655047	0.55102	0.482541	0.582951	0.785674	0.919741	0.75556	-0.970342	0.921214	-0.24397	-0.950397	0.969748	0.971211	0.758715	0.565612	0.926384	0.836651	0.0827917	-0.107858	0.197512	0.643558		-0.0149237	-0.633714	0.319995	0.943858	0.989426	0.654466	-0.487821	0.997651	-0.300341	0.273647	0.582688	-0.998141	0.99796	-0.0569417	-0.0333148	0.687659	-0.32393	0.547659	-0.707107	-0.406007	0.908746
364			0.803341	-0.716726	0.985102	-0.584802	-0.744405	-0.994373	-0.983607	-0.987345	-0.928081	-0.897832	-0.990302	-0.988517	-0.957578	0.702393	-0.714329	-0.75821	-0.464549	-0.902362	-0.992278	-0.98257	-0.860622	-0.638018	-0.995956	-0.385894	-0.982224		-0.917834	-0.837317	-0.192486	-0.863557	-0.937651	-0.98428	-0.999829	-0.744835	-0.703598	-0.948683	-0.509228	-0.999981	-0.992013	-0.55727	-0.592736	-0.431853	-0.86584	-0.795137	-0.638189	-0.515541	-0.957777
365		0	0.997046	0.0639933	-0.208983	0.497478	-0.899814	0.978616	-0.108092	0.378245	0.323888	-0.265295	0.670136	-0.987737	0.0552152	-0.456554	-0.248884	-0.688116	0.413065	0.0790948	0.940118	-0.0416305	0.219363	-0.0435827	0.815507	0.0960248	-0.216083		-0.0904141	-0.296691	0.329763	-0.909403	0.982424	0.106962	-0.0766965	-0.559948	-0.519469	-0.622331	0.0424146	-0.762462	-0.683832	0.551908	0.209083	0.185148	0.834773	-0.387498	-0.529999	-0.322138	0.320304
366	0		0.996605	0.876279	-0.306145	0.381357	0.773377	0.387871	0.896871	0.579207	0.520151	-0.114774	0.524702	-0.0653287	0.0465182	0.321074	-0.998112	0.881233	0.206438	0.0396601	0.420697	-0.0657599	-0.627392	0.371391	-0.0321549	0.942275	0.564246		0.222616	0.231773	0.584619	0.342738	0.77689	-0.24896	0.0435341	0.941887	-0.105854	0.608696	0.819232	0.0181582	0.831155	0.0447313	0.644525	0.972262	0.0345019	0.791246	-0.0409014	0.508432	0.701964
367			0.840543	-0.771804	0.83697	-0.813545	-0.0178543	-0.373011	0.585964	-0.0238028	0.534642	0.649584	-0.803329	0.216311	0.0939226	-0.303101	0.997054	0.324275	0.959524	0.957756	-0.6809	0.335238	1	-0.0845585	-0.998831	0.0908448	0.131685		0.716269	-0.71991	-0.0857515	0.892213	-0.792503	0.906956	-0.692575	-0.928232	-0.0789606	-0.570011	0.172427	-0.733657	0.737487	-0.138604	-0.400303	-0.435329	0.107177	0.32461	-0.255341	-0.594884	-0.603049
368			0.727146	0.931033	0.999073	0.395292	-0.267425	-0.577581	-0.238634	-0.544402	0.0139846	0.999906	0.721694	0.784221	-0.736328	-0.849568	-0.768221	-0.648119	-0.753824	0.51622	-0.985954	-0.405401	0.535511	-0.97526	-0.192479	0.300556	0.39104		-0.928477	0.755033	0.31435	-0.374618	-0.437582	-0.997961	-0.568917	-0.384829	0.695073	0.328189	-0.305862	-0.903844	0.888621	0.842786	0.495163	0.475907	-0.641462	-0.184289	-0.221802	-0.770513	0.794738
369			-0.0824434	0.032977	-0.419302	-0.0791625	0.44306	0.588793	0.26869	-0.0290913	0.575798	0.686762	0.306882	-0.541774	-0.240884	-0.859046	-0.424907	0.362621	0.731451	0.128023	0.806962	-0.157893	-0.879801	-0.202206	-0.202338	0.0684664	-0.104861		0.100952	-0.270563	-0.703027	-0.390649	-0.373448	0.471349	0.158514	0.88122	-0.350914	0.247623	-0.0256875	-0.764193	-0.74389	-0.407701	-0.974997	0.1509	-0.20578	0.87914	-0.0502159	0.548656	0.339936
370		0	0.742961	0.876349	0.999994	-0.185735	0.892267	-0.757098	0.673222	0.936211	0.814545	0.388219	0.568454	0.977414	0.990257	0.794802	0.0885398	-0.978328	0.130006	0.364741	0.889696	-0.284447	0.385613	0.973841	0.166651	0.118022	0.981812		0.135871	0.658505	0.294664	-0.859957	0.986079	0.991111	0.97536	-0.287754	0.128616	0.702145	0.246545	-0.968859	0.955675	0.543251	0.954938	-0.572653	0.133283	0.99978	0.965716	-0.168964	0.717555
371		0	0.70854	-0.942341	0.258674	-0.739396	-0.994207	-0.456805	-0.455784	-0.638707	0.0520128	-0.354766	0.943431	0.777844	-0.0422699	-0.368266	-0.48199	0.232624	-0.668012	-0.9999	-0.755689	-0.328164	-0.278652	-0.726192	-0.0581538	-0.850528	-0.0309662		-0.890799	-0.803798	-0.0840865	0.335265	0.471349	-0.557635	-0.0919653	0.0274287	-0.191157	0.999924	-0.409022	-0.821016	-0.594811	-0.17086	-0.684934	0.153562	-0.313849	-0.197018	-0.066519	-0.170568	-0.850919
372	0	0	0.568483	-0.761243	0.268458	0.212599	0.625988	-0.0681781	0.98445	-0.930352	0.0302891	-0.121465	0.127164	0.971624	0.180756	-0.542934	-0.924282	-0.951571	0.731055	0.2525	0.608969	0.880471	0.348409	-0.892981	-0.613941	-0.454397	0.0866296		0.0808159	-0.235188	0.10783	-0.604952	-0.277801	0.665696	0.66712	0.537297	-0.189534	0.0682813	0.0348093	-0.895852	0.198204	-0.0714108	0.837271	0.113609	0.208292	-0.0588205	-0.465085	-0.709142	0.983794
373		0	-0.562877	0.701989	-0.602752	-0.611637	-0.497669	-0.557761	-0.0847057	-0.87832	0.597342	-0.996009	0.654763	0.409488	-0.509703	-0.207951	-0.915431	-0.288292	0.134336	-0.50762	-0.99987	-0.0960173	-0.258969	0.605367	-0.620129	0.274721	0.615922		-0.985408	-0.98821	0.127742	-0.14073	0.812538	-0.525128	-0.0845585	-0.267644	0.0963242	0.632953	-0.275456	-0.957122	-0.822347	-0.736901	-0.0634081	-0.271043	-0.379708	-0.999708	-0.978616	-0.242536	-0.67907
374	0	0	0.21681	-0.560462	-0.0544522	-0.259269	0.0620781	-0.310954	0.0447893	0.00795203	0.148027	-0.106366	-0.787484	-0.964011	-0.25802	-0.18843	-0.149128	-0.545049	-0.391977	-0.0359682	-0.676926	-0.23236	-0.0997922	-0.0324436	-0.255893	-0.142194	-0.173053		-0.134379	-0.0156231	0.801104	0.490118	-0.482058	0.472276	0.224399	0.450827	-0.186755	-0.038254	-0.33209	-0.572302	0.0126326	0.0608496	-0.240334	-0.35865	-0.424409	0.148397	-0.0831063	0.083394	-0.146977
375	0	0	0.365753	0.0945226	0.115013	0.277804	0.167133	0.218949	0.176611	0.330982	0.180565	0.150563	-0.00146843	0.3046	0.222478	0.356544	0.147659	0.0490094	0.204232	0.196694	-0.104542	0.160455	-0.0499603	0.0945896	-0.0854011	0.252587	0.0977389		0.0560198	0.00367419	0.310792	-0.0724943	0.175666	-0.233457	0.399018	-0.0998594	0.329498	0.0505509	0.152561	-0.201239	0.138111	0.118094	0.159483	-0.00447223	0.141642	0.132356	0.0456803	0.0350434	0.145444
376		0	0.965876	0.56825	0.947606	0.0218395	-0.0525588	0.203165	-0.0102296	0.703779	0.973364	0.355681	0.924189	0.93767	0.175791	-0.565453	-0.963111	-0.467054	0.200004	0.985	0.144051	0.333466	0.792914	0.943796	0.560948	0.267281	0.376579		0.905882	0.998079	0.545411	-0.6	-0.0155623	0.629583	0.723062	-0.593701	-0.991355	-0.0100666	0.233207	0.0901081	0.709302	0.577465	-0.235294	0.773805	-0.0282906	0.99401	0.972806	0.766371	0.135618
377	0	0	0.440791	0.363794	0.00661264	0.358556	0.202506	0.152618	0.724718	0.14951	0.31342	0.248942	0.233207	0.236352	0.0820535	0.389353	-0.210924	-0.0294323	0.166026	-0.0260675	0.957288	0.166294	0.171129	0.164105	0.0653078	-0.00502506	0.292123		-0.0773134	-0.355091	0.987038	-0.139028	0.31504	0.422925	0.363789	0.455514	0.159813	0.0410135	0.148713	-0.0887458	-0.251197	0.0891498	0.222567	0.367257	-0.0660931	0.482545	0.527652	-0.598323	0.310458
378			0.516797	-0.439867	0.486201	0.446928	0.655084	-0.199019	-0.0319122	-0.155752	0.761044	0.718602	0.96061	0.302952	0.436471	0.738837	-0.568854	0.401379	0.992748	0.402442	0.62433	0.754082	0.0928047	0.856515	-0.394426	0.853898	-0.00683044		0.496139	-0.0246404	0.209492	0.597918	-0.565594	-0.796063	0.882116	0.377428	-0.188386	-0.349109	0.446309	-0.669246	0.704018	0.880064	0.489006	-0.583237	0.243918	-0.264089	-0.292581	0.980581	0.308108
379			0.0729125	-0.260666	-0.971494	-0.249694	-0.458766	-0.160676	0.747409	-0.431455	0.515109	-0.99047	0.857182	-0.278892	-0.387976	-0.456961	-0.407034	-0.43983	-0.652841	-0.122155	-0.154902	-0.343934	-0.318529	0.047958	0.0517235	-0.216162	-0.451383		-0.64253	-0.245231	0.120107	0.494302	-0.519052	-0.155963	0.142922	0.500503	-0.99055	-0.579648	-0.0228512	-0.423662	-0.49885	-0.275867	0.306009	0.834301	-0.562865	-0.297298	0.974391	0.623559	-0.730527
380		0	0.386953	-0.997975	0.835974	-0.525409	-0.364468	-0.906332	-0.331693	0.987183	0.0881511	-0.37916	-0.601999	-0.375564	0.170826	-0.971683	-0.271795	-0.981734	-0.260354	-0.350146	-0.33035	-0.242536	-0.975179	-0.98302	-0.972302	-0.837611	-0.477698		-0.146009	-0.835171	-0.012323	-0.702542	0.510274	0.0144912	0.884006	-0.783981	-0.707107	-0.0388399	-0.988045	-0.988913	0.772928	-0.767572	-0.904447	-0.294462	-1	-0.274164	-0.972006	-0.840851	0.0267284
381		0	0.793606	0.713773	0.895953	0.196707	0.824306	-0.993379	0.137548	0.130144	0.611911	0.121398	-0.90569	-0.174407	-0.589734	0.708581	-0.857914	-0.0985281	-0.164399	-0.283138	0.434299	0.0607848	0.272517	0.742192	-0.116428	0.693039	-0.239714		-0.0830455	0.916157	0.25082	-0.983968	-0.651933	-0.981598	-0.225116	0.996707	-0.268444	-0.529999	-0.657111	-0.10855	0.255893	-0.265481	-0.566398	-0.263117	0.180962	-0.187295	0.475248	-0.929428	-0.447214
382		0	0.426216	-0.569937	-0.994318	-0.975296	-0.499299	0.247004	-0.816474	-0.30978	-0.275523	0.199738	0.527606	0.472037	-0.320871	-0.254493	-0.409102	-0.755874	-0.67054	-0.0573766	-0.668125	-0.584952	-0.702808	-0.533587	-0.329683	-0.300578	-0.834958		-0.554405	-0.34962	0.112257	0.312646	-0.910815	-0.107894	-0.182331	-0.974567	-0.0843232	-0.487119	0.978747	-0.765974	-0.5429	-0.854676	0.317823	-0.574809	-0.792688	-0.0494444	0.0823485	-0.881766	-0.735011
383		0	0.701827	0.777686	0.381792	0.486021	0.94315	-0.934899	0.584454	0.689012	0.61582	-0.182309	0.506201	-0.997996	0.877714	-0.641072	-0.0811271	0.409056	0.175239	0.191479	0.980886	-0.649325	-0.59455	0.992074	-0.586269	0.648349	0.266198		0.134481	0.682148	0.181131	0.639579	0.898364	0.952926	0.173631	0.926064	0.0120473	0.443404	-0.971724	0.990776	0.879292	0.84014	0.739659	0.443298	0.359661	0.942162	0.801457	0.705367	0.712584
384			0.234102	0.401155	0.0180363	-0.0980652	0.116332	-0.0004995	0.311121	0.199197	0.039504	0.274395	0.178972	-0.104448	0.0588864	0.526927	0.174119	0.00435157	-0.0862911	0.0355614	-0.175491	-0.187679	0.0750565	-0.480403	0.288938	0.142585	0.215653		-0.014025	0.175437	0.0782776	-0.218095	-0.0332516	0.188537	0.516393	0.176119	-0.0395429	0.125344	0.0503188	0.298235	0.195786	-0.0468008	0.253558	0.414352	0.469798	0.193519	0.929119	0.49581	-0.380533
385			0.224359	-0.0286621	0.550757	0.558407	0.221665	0.124449	0.294945	0.380087	-0.141174	0.127611	0.623092	0.798625	0.186806	0.602616	-0.513316	-0.0304273	0.0805881	0.0904043	0.217178	0.671574	-0.511654	0.706304	-0.0777535	0.626123	0.318248		0.17125	0.356463	0.573728	-0.394741	0.192242	0.0393547	0.867618	-0.0562275	0.716904	0.271098	0.32898	0.0170551	0.548796	0.0536141	-0.27386	0.549178	-0.29322	0.898384	0.695786	0.257322	0.786144
386		0	0.107272	-0.0774485	-0.19151	-0.0670511	0.31576	0.151804	-0.0732932	0.485894	0.0149983	0.294885	-0.722835	0.513773	0.100835	-0.50073	0.066348	0.0611327	0.139194	0.293287	0.292471	0.166673	-0.0206649	0.133348	0.184971	0.379234	0.244979		0.0887213	0.121339	0.78307	0.615888	-0.169636	0.33996	0.391508	0.436337	0.0795297	0.176201	0.506784	0.331414	-0.349437	0.158488	-0.39153	0.311522	0.468904	0.210667	0.407683	-0.388844	-0.28203
387		0	0.0711123	0.230824	-0.42453	0.0566508	-0.234611	0.00499577	-0.126531	0.246154	-0.35086	-0.282302	0.796954	-0.300602	-0.0632586	-0.346111	-0.38937	0.15674	-0.153808	-0.16628	-0.100277	-0.214929	0.0386849	-0.359277	-0.326087	-0.144534	-0.302222		-0.164399	-0.101742	0.0112871	-0.370172	-0.185476	0.307943	-0.209331	0.0115912	-0.13764	0.113579	-0.305038	-0.561742	-0.0261643	-0.211503	0.811705	-0.324699	-0.484702	-0.389233	0.24541	-0.209363	0.145039
388		0	-0.862525	-0.992114	-0.391164	-0.561051	-0.763011	-0.940334	-0.0898463	0.995229	-0.581882	0.0995037	-0.948455	-0.489026	-0.421111	0.522562	-0.60866	-0.883116	-0.477343	0.692225	-0.968843	-0.0206567	0.0750565	-0.988012	-0.205493	0.242536	0.630866		0.204194	0.0929295	0.274939	-0.675725	0.989687	-0.572204	-0.976862	-0.572262	-0.956174	0.882128	-0.635558	-0.951152	0.854383	-0.0738717	-0.983435	-0.0506961	0.618452	-0.815226	0.736194	-0.963993	0.80555
389		0	-0.052414	0.637914	0.189899	-0.516013	0.203608	0.999817	-0.047673	0.102278	-0.248415	-0.288174	0.212798	0.269516	-0.195571	-0.517104	-0.533993	-0.348472	-0.0879432	0.0390327	-0.0944041	-0.330411	-0.110029	-0.530711	-0.174298	0.324324	-0.0277243		-0.195515	-0.0912839	0.0197556	0.349736	-0.0116641	0.294601	0.197845	0.48575	0.209927	0.970189	-0.0629124	-0.179018	-0.140195	0.10061	0.993261	-0.0573766	0.0619111	0.225217	-0.402423	0.947492	-0.0434372
390			0.414336	0.494741	0.714261	0.989235	0.0959221	-0.072047	0.308709	-0.959366	-0.390149	0.862817	-0.30334	0.553161	0.63829	0.28109	-0.44508	-0.524521	0.416453	0.377023	-0.965938	0.0342005	0.324843	0.959685	-0.179364	-0.339689	0.913159		-0.282166	-0.338039	0.687632	0.43391	-0.912509	-0.784046	0.526355	0.607814	-0.0382306	0.912818	0.398841	0.0137918	0.39685	-0.544773	-0.960629	0.615939	-0.544988	0.998721	0.996398	-0.982468	0.820606
391			-0.202025	0.919145	-0.679042	0.999448	0.322342	-0.298369	-0.0520875	-0.187112	0.897374	0.794079	0.949849	-0.167054	0.636383	0.442549	-0.705005	-0.74469	0.896442	-0.5288	-0.857154	0	0.712377	-0.994288	-0.00429181	0.373747	0.319713		0.00781226	-0.834958	0.452474	-0.862624	-0.319041	0.947514	0.460024	-0.743872	0.396436	0.903676	-0.913357	-0.738837	0.881083	-0.954204	0.894932	-0.305428	0.663867	0.506493	0.872943	0.836693	-0.208638
392			0.30646	-0.873599	0.476408	-0.926092	0.513821	-0.435711	0.194535	-0.206558	-0.89633	-0.998765	-0.843758	-0.717928	0.254221	-0.988202	-0.999201	-0.994937	-0.702729	-0.137747	-0.784098	-0.643848	0.476624	0.317803	-0.200944	-0.228191	0.880685		-0.998532	0.75741	0.160386	0.921399	-0.698251	-0.271208	0.926542	0.76758	-0.628482	0.68523	-0.0240894	-0.999985	0.988012	0.469784	-0.912968	-0.348294	-0.820819	0.385806	0.0936461	-0.885164	0.99619
393		0	0.422498	0.829588	-0.0770648	0.387918	0.579755	-0.986394	0.398173	0.560049	-0.118271	-0.309395	0.682642	0.991428	-0.171872	-0.769176	0.238362	0.609711	0.523561	0.0302891	-0.935497	0.727752	-0.337922	0.519101	-0.0471452	0.740952	-0.0363997		0.590319	-0.194151	0.966838	-0.480988	-0.753661	-0.63293	0.339739	0.866274	0.182185	0.791536	0.579094	-0.380965	-0.277843	0.037709	0.253238	-0.0247986	0.535457	0.0820974	-0.012269	-0.824332	-0.300804
394			0.668965	-0.449266	0.526259	-0.927049	0.996978	0.140462	-0.97898	0.364565	-0.475517	0.970143	-0.213452	-0.424203	-0.0808159	0.523418	-0.499179	-0.999745	-0.216219	-0.670913	-0.483589	0.241215	0.78062	-0.993001	0.0905357	-0.357489	0.9953		0.628019	0.824225	0.121203	0.908794	-0.968918	0.957514	0.854733	-0.857493	0.479185	0.794999	-0.85908	-0.976278	-0.777678	0.157432	0.163139	0.999527	-0.595228	0.391294	0.729073	0.225271	-0.214657
395			0.319316	0.777486	-0.0509143	0.502072	0.222825	0.816968	0.0179076	0.903041	0.863936	0.218838	-0.595659	0.732191	0.243403	0.748482	-0.184965	-0.454885	0.764234	0.646823	-0.411587	0.600976	-0.095669	0.969246	-0.383157	0.993253	-0.856792		-0.466495	-0.0314805	0.825052	0.241772	0.420771	0.00507608	0.655067	0.973458	0.116591	0.441248	0.949275	-0.914871	0.581238	0.140438	0.655206	0.255569	0.105168	-0.36752	-0.490261	0.575053	-0.256435
396			-0.139879	0.130477	-0.164399	0.154514	0.569494	-0.0931417	-0.0706631	-0.11557	-0.331105	-0.0985471	0.872183	-0.50083	-0.0971711	-0.0639713	-0.303834	0.0196407	0.425472	0.29317	0.0674734	-0.157083	0.0711295	-0.188018	0.433112	0.0935423	0.0422784		0.2527	-0.022453	0.241802	-0.0640542	0.236071	-0.719655	0.282723	0.332722	-0.023439	0.812058	-0.00125313	-0.181886	0.480694	0.013085	-0.322315	-0.0738717	-0.00458185	0.0828878	0.0701036	-0.323544	0.254012
397		0	-0.427621	0.492617	-0.0191353	0.524097	0.698499	-0.932619	0.257534	-0.625481	-0.428811	-0.848324	-0.544119	-0.999819	0.562578	-0.557578	-0.999768	-0.994486	-0.443514	-0.931401	-0.556065	0.607226	-0.0545304	0.768674	-0.551763	0.389911	-0.0999677	1	-0.50623	-0.244722	-0.634998	-0.930357	-0.467054	0.616244	0.0521268	-0.816749	-0.991332	0.344727	-0.280082	-0.974472	-0.573773	-0.218988	-0.826404	0.743921	-0.225458	-0.202655	0.16014	0.48519	0.456244
398			-0.326807	-0.664807	-0.521351	0.148133	0.606293	-0.927242	-0.362446	-0.141635	0.037798	-0.791191	0.0774068	-0.106416	-0.885692	-0.406138	-0.659686	-0.686675	-0.163459	0.0718141	0.298275	-0.953725	-0.22948	-0.997508	-0.643023	-0.364399	-0.634739	-1	-0.636881	0.384615	0.514496	0.998053	0.998629	-0.811901	-0.999916	0.280269	-0.408477	-0.579524	-0.156825	-0.66088	-0.185306	0.198501	0.15952	0.621311	0.120878	-0.490935	-0.176149	-0.687854	-0.642443
399			0.354731	0.11748	-0.286878	-0.997875	0.72789	-0.0370802	-0.209529	0.0235229	-0.0816378	-0.317622	-0.420202	0.340468	-0.00263157	-0.0769318	-0.246212	-0.371171	-0.126192	0.0219246	-0.14834	0.531552	-0.0649513	0.911371	0.506201	0.164536	0.273438		-0.90822	-0.481431	0.205215	-0.593542	0.104685	-0.234572	0.921426	-0.386039	0.113207	0.0196683	-0.343866	-0.87875	-0.0514469	-0.146938	0.936406	-0.136539	0.995701	0.568411	0.329898	0.482406	0.579207
400			0.359944	-0.576389	-0.403183	0.308177	0.390856	-0.251219	0.200747	-0.464662	-0.167623	-0.0861405	-0.160258	0.442272	-0.00836091	-0.109774	-0.653233	-0.541574	0.204573	0.237804	0.483405	0.238907	-0.96728	-0.809235	-0.165014	0.929416	-0.254416		-0.0643823	-0.410795	-0.236567	0.484433	0.0519013	-0.519688	-0.225138	-0.114427	0.0619811	0.240668	-0.160071	-0.337648	0.787133	-0.553042	0.528325	0.0859803	-0.312374	-0.191666	0.106769	-0.104101	-0.182864
401		0	0.798815	0.695022	0.0389736	0.848577	0.377824	-0.0964746	0.546013	0.89628	0.700695	0.717706	0.483943	0.0913275	-0.0276574	0.332738	0.124811	0.550313	0.21243	0.260764	0.892851	0.635512	0.477929	-0.596731	0.5547	0.999674	0.693469		0.173026	0.0342005	0.597693	-0.920408	-0.684156	0.472493	0.380822	0.337947	0.0551645	0.788961	0.584187	-0.425272	0.795592	0.479185	-0.98916	0.841668	0.287837	-0.0767995	0.335283	0.41772	0.152528
402		0	0.947777	0.680043	0.733185	0.844469	0.717738	0.427421	0.285507	0.425797	-0.0481896	0.793431	0.613319	0.839497	0.00305809	-0.978125	0.289561	-0.559767	0.255561	0.82099	0.40199	0.122289	0.0222167	-0.825015	0.336921	0.496535	0.206382		0.293399	-0.0518781	0.0659578	0.815097	0.067788	0.526154	0.230098	0.795935	0.50717	-0.336964	0.672673	-0.345094	-0.358626	0.716752	0.501499	0.154053	-0.114403	0.595099	0.443661	-0.557219	-0.160676
403			-0.65362	-0.157254	-0.226699	-0.142418	0.278285	-0.867332	-0.0688677	0.329315	-0.0345947	0.38075	-0.786104	-0.951075	0.166821	0.591198	-0.513732	0.993593	-0.00242326	0.188534	-0.812491	-0.0611666	0.0745686	0.654224	-0.441968	-0.123236	0.236768		-0.314425	-0.0949183	-0.323767	-0.920101	-0.0880031	-0.902246	-0.30682	-0.540274	-0.965948	0.948683	0.0304736	-0.323615	-0.39286	-0.254652	0.467459	0.112584	-0.388813	0.0228512	0.956674	0.340318	0.450069
404			0.138683	0.433037	0.0849964	-0.99556	0.847617	-0.0422508	0.148067	0.339518	0.167839	0.0516732	0.999888	0.0875743	0.160071	-0.16807	0.179572	-0.0921177	-0.0127049	0.188905	0.315461	0.0762027	0.191053	0.599783	0.948683	0.30521	0.130352		0.117255	0.125607	0.472081	-0.110685	-0.200639	0.408114	0.394835	0.199091	-0.391078	0.0536352	-0.0788967	-0.658147	0.418261	0.254404	-0.444442	0.129687	0.738332	0.0973218	0.294086	0.572953	-0.249271
405			0.763056	0.149433	-0.0129553	0.45556	-0.134759	0.0183036	-0.165585	-0.21304	-0.3946	-0.339058	-0.313589	-0.977912	-0.0251719	0.525037	-0.444381	0.446732	0.573462	0.483544	-0.164937	-0.391996	0	-0.675825	-0.436665	-0.233485	0.102243		-0.570577	-0.0163183	0.547659	-0.294554	0.173949	-0.0680972	0.204384	0.373691	-0.024154	0.303028	0.0962627	-0.982359	-0.676437	-0.19493	0.925038	0.0834865	-0.23575	-0.602278	0.00221483	0.564409	-0.034714
406			0.373765	0.496139	-0.0708174	-0.174481	0.000855432	-0.125558	0.0470682	0.256009	0.207941	-0.0878668	0.251108	0.915028	0.0164196	-0.887301	-0.173346	-0.0713205	0.985622	0.0412223	0.183619	0.289253	-0.0941742	0.460494	0.307417	-0.0224433	0.0990331		-0.170382	-0.0539478	0.364151	0.351123	-0.162779	0.38035	0.174312	0.221575	-0.26372	0.00500411	0.218331	-0.488053	0.512498	0.192996	-0.851921	-0.0727889	0.477624	-0.108024	0.109792	-0.460103	0.388449
407	0	0	0.242882	-0.497417	-0.186755	0.999762	-0.337402	-0.369291	0.0184584	-0.0320822	0.127603	-0.397918	-0.672379	-0.227918	-0.00396036	-0.509996	-0.23692	-0.372576	-0.13585	-0.486582	-0.410436	-0.26629	0.0448528	-0.541478	-0.261839	0.485643	-0.370703		-0.361092	-0.122361	-0.0512772	0.122401	-0.373987	-0.438835	0.947802	-0.491194	0.00866634	-0.300635	-0.975133	-0.0766965	-0.738235	-0.311707	0.326545	0.0309662	0.192813	-0.373656	0.116498	-0.544119	-0.192135
408	0	0	0.499353	0.14777	0.206959	-0.191473	0.0331513	0.64567	-0.540004	0.0607774	0.120827	-0.190043	0.927098	-0.806679	-0.0463419	-0.522829	-0.138938	-0.191146	-0.159104	-0.268185	-0.241448	0.0807588	-0.026121	0.0951545	-0.545384	-0.419555	-0.120608		-0.51561	-0.0452253	0.210007	0.0157049	0.409826	0.170877	0.318802	-0.213123	-0.115048	-0.282075	-0.0468528	-0.229117	0.190706	-0.233454	0.441477	-0.316228	-0.00884921	0.00516789	-0.0462468	0.797161	-0.121909
409			-0.741536	0.932811	-0.767359	0.679371	0.822458	-0.239749	0.149856	0.823313	0.619858	0.219994	-0.415602	0.551433	0.125202	0.30078	0.999086	0.241515	0.244694	0.751554	0.117327	-0.135826	0.629669	-0.87798	0.160462	0.217739	0.863644		-0.207414	0.93112	0.91004	0.167253	-0.817377	0.565072	0.905384	0.858724	0.841041	-0.00949324	0.701547	0.804176	0.625232	0.9302	0.505989	0.956436	-0.620338	0.426364	0.0827342	-0.426267	0.798622
410			0.142573	0.99175	0.580137	0.378434	0.416877	0.570926	-0.903658	-0.207373	0.252292	-0.64725	-0.930255	-0.594671	-0.353196	0.805521	-0.610803	-0.725064	-0.058722	0.118843	-0.24524	0.0459285	0.578881	0.968309	0.0850994	-0.0251669	-0.906721		-0.953353	-0.112949	0.998432	-0.85319	-0.979908	-0.698727	0.845926	-0.62299	-0.565127	-0.999654	0.413126	-0.469428	-0.985128	-0.737673	-0.868243	-0.785132	-0.436274	0.956934	-0.971534	0.62526	-0.99459
411			0.40525	0.535652	-0.182658	0.56231	0.444262	-0.00513472	-0.0873837	0.676873	-0.0673961	0.308645	0.984979	-0.473966	0.155895	0.0387431	-0.15984	0.128331	0.627444	0.494538	0.0340305	-0.329025	-0.135138	0.14942	-0.122456	0.247904	0.172611		-0.423726	-0.249729	-0.995264	0.158392	0.0100666	0.640523	0.376265	0.33074	-0.000837521	-0.161368	-0.172053	-0.0166644	0.463861	0.182955	0.537084	0.325385	0.189486	0.202553	-0.0800178	-0.0257646	0.725464
412			-0.128884	-0.271431	0.346936	0.00124069	0.0459662	-0.0369628	0.158037	-0.073485	-0.0858883	0.213532	-0.720623	0.665799	-0.0416645	-0.0746767	-0.279317	0.0913594	-0.105349	-0.158141	-0.457439	0.189298	0.0492057	0.793949	-0.179709	-0.0539753	-0.10527		-0.354443	0.0459737	0.320248	-0.124313	0.0125848	-0.410365	0.480197	-0.167034	-0.0400522	-0.315672	0.15452	-0.630136	-0.245965	-0.318019	0.231723	-0.0765057	0.166678	-0.0194549	0.0758805	-0.289065	0.14834
413			0.392458	0.357346	0.863355	0.628722	0.542347	-0.0197071	-0.219172	0.501036	0.0552098	0.340048	0.997929	0.41596	0.21106	-0.221214	0.0246039	0.0013947	0.826927	0.232339	0.0313698	0.380484	0.0866296	-0.732719	0.976341	0.279524	0.0530982		-0.216176	0.0577547	0.613185	-0.188373	0.355897	0.700131	-0.0531714	0.340913	0.602163	-0.19006	-0.160993	-0.822364	0.258333	-0.0784611	-0.0923395	0.359613	0.179875	-0.0766965	0.228789	0.724764	-0.106286
414			0.299196	-0.392026	-0.885589	-0.572525	0.0475651	-0.440309	0.457348	-0.460919	-0.560848	-0.762312	-0.870326	0.499837	-0.465746	-0.366036	0.0397774	-0.250621	-0.11423	-0.894882	0.0988049	-0.266944	-0.0707978	0.6631	0.00192307	-0.461291	0.769562	-1	-0.83136	0	0.884545	0.260523	-0.923771	0.505886	-0.945946	-0.909589	-0.728566	-0.194907	0.679835	-0.398646	-0.337632	0.62662	-0.928732	0.651488	0.0333943	0.356622	-0.709811	-0.895097	0.353588
415			0.850923	0.548026	-0.0317759	0.279789	0.275272	0.759852	-0.0361427	0.997182	0.303204	-0.911195	-0.435928	-0.387431	0.0443113	0.839042	-0.681104	0.675373	0.280365	0.979457	0.710118	0.312718	0.768424	0.748234	0.0390763	0.978009	-0.215482		0.341743	0.304833	-0.999027	-0.859136	-0.547821	0.0691411	0.976551	0.968482	-0.636769	0.92794	0.902861	-0.185408	0.439027	0.29791	0.306009	-0.298847	-0.17991	0.124035	0.452436	-0.589789	0.815143
416			-0.181547	-0.897303	0.159546	0.490809	-0.760733	-0.0593665	-0.0623783	-0.441585	-0.985408	-0.790831	0.498823	-0.517383	-0.974043	-0.790119	0.96	-0.588072	-0.788293	-0.724138	-0.552346	-0.0108219	-0.121541	-0.99333	-0.837317	0.212064	0.236816	1	-0.876147	-0.697107	0.0251013	0.0416305	-0.670245	-0.999224	-0.94346	-0.932005	-0.71793	-0.999137	-0.917262	-0.959474	0.393919	-0.187722	0.0850565	0.50153	-0.635773	0.452376	-0.0491828	0.908429	-0.832385
417	0		0.980475	0.876687	0.669543	0.268065	0.507579	0.252071	0.131653	0.540908	0.123002	-0.988936	-0.0475651	0.997723	0.419808	-0.258467	-0.847235	0.292504	0.522052	0.88305	-0.921887	0.275228	-0.338456	0.825714	0.612083	0.183679	0.605469		0.13466	-0.0682926	0.695349	0.58007	0.340192	-0.128995	0.850182	0.973666	0.431861	-0.491013	0.649936	-0.297552	-0.324144	0.207243	-0.575308	0.486241	0.102537	0.459423	0.750893	0.624695	0.312211
[truncated: 196 more columns]

## Sheet: Supplement 2B 20EGF
	Cell 0	Cell 1	Cell 2	Cell 3	Cell 4	Cell 5	Cell 6	Cell 7	Cell 8	Cell 9	Cell 10	Cell 11	Cell 12	Cell 13	Cell 14	Cell 15	Cell 16	Cell 17	Cell 18	Cell 19	Cell 20	Cell 21	Cell 22	Cell 23	Cell 24	Cell 25	Cell 26	Cell 27	Cell 28	Cell 29	Cell 30	Cell 31	Cell 32	Cell 33	Cell 34	Cell 35	Cell 36	Cell 37	Cell 38	Cell 39	Cell 40	Cell 41	Cell 42	Cell 43	Cell 44	Cell 45	Cell 46	Cell 47	Cell 48
0	-0.848625	-0.9971	0.495472	-0.607269	-0.691896	0.452671	0.445578	-0.109602		0.535157	0.211941	-0.764268	0.0465901	0.152126	-0.108039	-0.687939	-0.161913	0.855198	0.998259	0.182908	0.700056	0.551245	0.523294	-0.560848	0.325757	-0.997129	-0.135365	-0.202092	0.990872	0.942803	-1	0.551107	0.986643	0.544846	-0.898355	0.904305	0.790324	0.600691	-0.0992061	-0.294476	-0.242536	0.968493	-0.999843	-0.999842	-0.126652	-0.304827	0.365228	0.964116	0.839408
1	-0.511359	-0.713582	-0.665798	-0.352804	-0.980907	-0.504051	0.0904351	-0.249101	0	-0.546543	0.994098	-0.780869	-0.306225	0.654385	0.337213	-0.9173	0.849864	0.207546	0.361471	0.320807	0.617539	0.442682	-0.916574	0.951698	0.798399	-0.958945	-0.110988	-0.4143	0.929802	-0.523359	0.011851	-0.5547	-0.853298	-0.310728	0.281574	0.866622	0.486486	0.947787	-0.906282	-0.601331	0.806881	-0.862416	0.228796	-0.96779	-0.0317114	-0.444094	0.36763	0.180652	0.694136
2	-0.264246	-0.504802	0.339626	-0.0638472	-0.0523625	0.0107444	0.488581	0.0804526	0	0.663985	0.411613	-0.774925	-0.0195111	-0.0187493	-0.0371014	-0.104444	-0.961295	-0.129196	0.290899	-0.390174	0.637511	0.831435	0.0879173	0.342318	-0.73721	-0.81066	0.445001	-0.824981	-0.60935	0.740639	-0.590754	-0.104992	0.100009	0.124215	-0.0563955	-0.339537	0.136455	-0.490391	0.530368	0.13171	0.0458741	0.799069	0.0833086	-0.569591	0.114624	-0.20389	0.779581	0.0289733	0.114263
3	-0.965814	-0.869324	-0.0830455	0.0416954	-0.238286	0.192999	-0.169043	0.00889418		-0.556924	0.371611	-0.350999	-0.463955	0.153968	-0.0665503	-0.870132	0.889913	0.181848	0.0344623	-0.530593	0.807965	0.650791	0.666174	0.321497	0.212933	-0.953983	-0.0456903	-0.183968	-0.325991	-0.52013	-0.484861	-0.950635	0.968349	-0.75186	-0.616615	0.805591	0.604335	0.99291	0.0248063	-0.581238	-0.426381	-0.293583	0.0144315	-0.581607	-0.0971	-0.607981	-0.014892	0.128424	0.855167
4	0.500793	-0.135674	0.176791	0.47533	0.387688	0.221453	0.999974	0.889817	0	0.99807	0.868419	-0.515857	0.241936	0.767253	0.512392	-0.399003	0.978598	0.157224	0.0844921	-0.427606	0.87952	0.571239	-0.243645	0.98576	-0.38391	-0.914482	0.246373	-0.113608	0.125506	0.737607	0.406418	0.774055	-0.733579	0.289489	-0.555596	0.888218	-0.129677	0.63884	0.465146	0.151804	0.0972305	0.16163	0.227517	-0.38219	0.539483	-0.155166	0.769879	0.635958	0.0229166
5	0.56206	-0.991559	0.622641	0.426384	-0.667692	0.918438	0.392542	-0.597595		0.927222	0.796768	-0.895093	0.0215467	0.235256	-0.73994	-0.37363	-0.00192307	-0.231328	0.912804	-0.501748	0.680962	0.705825	0.997227	0.143071	0.0138635	0.63605	0.985897	0.282945	0.711259	0.0480664	-0.999352	-0.849982	0.775391	0.678071	-0.839314	0.986914	0.970212	0.987304	0.988841	-0.503758	0.58612	-0.552293	-0.19185	-0.626231	0.938292	-0.968032	-0.6058	0.482827	0.737741
6	-0.582598	-0.771018	-0.527399	0.540081	0.888358	0.923077	0.764114	0.284023	0	-0.990862	0.875532	-0.701466	0.468523	0.426943	-0.978305	-0.967372	0.744729	0.808474	0.99969	0.99876	0.579917	0.870646	0.251729	0.459604	0.9956	0.913197	0.619644	-0.0428284	0.943055	-0.0188278	-0.645611	0.857628	-0.653894	-0.659662	0.864809	-0.630934	0.817377	0.86672	0.158816	0.932327	-0.524985	-0.915315	0.849234	-0.760462	0.847998	-0.958051	-0.97611	-0.388397	0.997338
7	0.606611	-0.933481	0.988619	0.577969	-0.910613	-0.990333	0.550595	-0.99983		-0.785955	0.224706	-0.947667	0.360105	0.260308	-0.887671	-0.574233	-0.647382	-0.81807	0.949879	-0.923275	0.857743	0.930618	0.442682	0.974282	-0.997373	0.972076	0.943213	0.120827	-0.169636	0.0596545	-0.918524	-0.336821	0.95674	-0.527904	-0.798864	0.959552	0.977214	0.974547	0.805056	0.00980345	0.598949	0.882454	-0.761075	-0.988527	-0.920889	-0.966584	0.734272	-0.570622	0.931689
8	0.842137	-0.668629	-0.64852	0.523247	0.703101	0.618706	-0.225608	0.962058	0	0.886418	0.826131	-0.887242	0.00877775	0.51126	0.967518	-0.179041	-0.607692	0.496604	0.979611	0.76909	0.211046	0.997763	0.545274	0.71269	0.957058	0.781738	0.532172	0.2182	-0.736286	-0.451355	-0.141713	-0.931797	-0.794822	0.10058	0.671668	0.230375	0.740428	-0.132577	0.836775	0.579207	0.786685	-0.988936	0.215991	0.578322	0.819232	0.603162	0.806297	-0.181741	0.473443
9	0.411328	-0.744583	0.27539	0.996094	-0.252777	-0.176515	0.28497	0.462258	0	-0.0268414	-0.0802187	0.269973	0.0324154	0.286778	-0.202842	-0.424835	0.266661	-0.573863	0.375039	0.310217	0.395497	0.327575	0.968277	-0.431924	-0.172943	0.995073	0.75079	0.0850565	-0.0763564	-0.170294	-0.157464	0.955651	-0.6578	0.260285	-0.427509	0.416628	0.504666	0.508254	-0.234197	0.297913	-0.798648	0.218388	0.530517	-0.728058	-0.256748	-0.292651	-0.346019	-0.320571	0.132671
10	0.365925	-0.140092	0.185033	0.303916	-0.754233	0.356118	0.401708	-0.536396	0	-0.153843	0.19996	-0.341063	-0.0134584	0.782511	0.495113	-0.428515	0.0758677	0.532742	-0.24438	-0.847577	0.12081	0.157075	0.728909	-0.799608	0.251866	0.833325	0.0704373	-0.00249583	-0.559541	0.890466	-0.551622	0.466072	0.769418	-0.101184	0.291038	0.621554	0.991733	0.669493	0.336931	-0.346195	0.994751	0.211738	0.148901	-0.0790299	0.992988	-0.928673	0.281697	0.192155	0.148412
11	0.542635	-0.582942	-0.398526	0.133716	0.0578061	-0.406138	0.583455	-0.875286		-0.0719662	-0.627837	-0.985986	0.229529	0.787641	-0.424823	0.0475651	0.430416	0.697506	0.99735	-0.936926	-0.0676413	0.254431	-0.154695	-0.878918	-0.180756	0.774248	0.293694	0.0623374	-0.637849	-0.659675	-0.286457	-0.994317	0.70932	-0.427824	0.0448528	0.581772	-0.25696	0.22178	-0.544773	0.286952	-0.108121	-0.862152	-0.230976	-0.0757313	-0.206894	-0.689764	-0.5927	-0.821999	0.947922
12	0.0929295	0.61407	-0.071392	0.630982	0.277131	0.249041	0.52401	0.968558		-0.00689639	0.133344	-0.866906	0.143757	0.380735	0.262124	-0.244502	-0.997686	0.665788	-0.521072	0.263849	-0.797178	0.452452	0.958824	-0.926264	0.473296	0.795501	0.184876	0.99722	0.981766	0.0150233	-0.355078	0.998372	-0.879292	0.565567	-0.545693	0.891102	0.414389	0.184289	0.690816	0.989703	0.142428	0.821879	0.997611	0.182225	0.380433	-0.9512	0.998801	-0.182634	0.138829
13	0.457069	-0.846219	0.223492	0.61667	0.13278	0.165936	0.650546	0.0916701		0.416176	-0.95609	-0.168964	0.0260262	0.652661	0.132479	-0.113192	0.140011	-0.752035	0.990327	-0.896862	-0.107112	-0.683844	0.157277	0.653385	0.239184	0.62933	0.201952	-0.391276	-0.722466	-0.950676	0.0723989	0.793606	0.979201	0.71247	0.313171	0.162257	0.823288	0.813801	0.329372	-0.413068	0.375848	-0.544988	-0.0606359	-0.122298	-0.991976	-0.515993	-0.964358	0.961242	0.674108
14	0.291496	-0.0654332	0.816124	0.425809	0.249878	0.29977	0.0748177	0.429118		0.157565	0.832566	0.00189036	0.356014	0.626954	-0.319041	-0.119029	0.317663	0.950843	0.201495	0.802222	-0.193125	0.492886	0.683439	0.999275	-0.984165	0.528629	0.597083	0.0214104	-0.869865	0.197512	-0.982107	-0.180794	-0.935193	-0.999942	0.864814	0.973376	0.696373	0.214002	0.395517	0.964802	-0.953278	0.679562	0.986071	-0.962388	0.366253	-0.0322413	-0.840198	0.855649	0.49474
15	-0.184787	0.27038	-0.0398796	0.605833	-0.60854	0.193022	0.0247858	0.33071	0	0.650239	0.297384	-0.998513	0.304776	0.514416	0.0746045	-0.0137796	0.28368	-0.900099	0.74321	0.0671651	0.152768	0.171518	0.909409	-0.396157	0.34037	0.317805	0.633988	0.994316	0.741213	0.430791	0.517877	-0.960646	-0.993953	0.303281	0.741678	0.14792	0.790117	0.127971	0.489694	-0.981036	0.38253	0.992458	0.398762	0.225448	-0.783111	0.214311	0.737993	0.057629	0.271912
16	-0.0128195	-0.553652	-0.497919	0.289288	0.70181	-0.657336	0.205239	-0.550722	0	-0.368718	-0.510955	-0.805924	0.926423	0.592644	-0.088318	-0.115185	-0.590196	0.992278	0.700396	-0.812092	0.246701	-0.539002	-0.0512148	-0.485643	0.807461	0.486724	0.0586456	0.491286	-0.838979	-0.384341	-0.738196	0.610571	0.999403	-0.464122	-0.0389676	0.375773	0.934443	0.990164	0.0260575	-0.450848	-0.253745	-0.869539	0.246369	-0.185663	-0.387608	-0.605503	0.264487	-0.914177	0.759257
17	-0.00860977	-0.744351	0.902061	0.160071	0.426009	0.649262	-0.0973275	-0.316768		-0.100332	0.911819	-0.998721	0.400735	0.343061	-0.953872	-0.217522	-0.991628	0.221912	-0.337347	-0.99994	-0.67073	-0.655687	0.356955	0.67564	-0.998284	0.516822	0.941195	-0.101594	0.847484	-0.799722	0.985684	0.324998	-0.985289	0.5312	-0.609898	-0.506677	0.942125	0.692747	-0.976357	0.345004	-0.973088	0.984531	-0.692756	0.187806	-0.728011	-0.994571	-0.998212	0.598537	-0.365222
18	0.152367	-0.5357	-0.563427	0.369875	-0.58563	0.736617	0.770783	0.999858		-0.970407	0.0402898	-0.912973	0.189561	-0.254821	0.66495		0.682623	-0.836144	0.927325	0.982542	0.765133	0.105685	0.249902	-0.581321	0.99971	0.77355	-0.151749	0.86582	-0.607139	0.956207	-0.204538	-0.344548	0.990358	0.911166	0.40364	0.955321	0.723301	-0.777134	-0.347074	-0.184763	0.72947	0.95023	0.980799	-0.826329	-0.894427	-0.996459	-0.460919	-0.84313	0.393619
19	-0.0731531	0.87334	-0.0281169	0.0772875	0.617682	-0.137725	-0.60064	0.566385	0	0.655988	-0.105006	-0.64346	0.255321	0.0575503	-0.0106264		-0.906093	0.262601	0.309534	-0.452858	0.218636	-0.429862	-0.0920925	0.538931	-0.537623	0.922778	0.812015	0.739783	0.397762	-0.973767	-0.825149	0.422682	-0.491065	0.27211	0.709561	0.663568	0.579642	0.685083	0.355783	-0.681058	-0.514056	-0.228329	-0.551433	-0.442372	0.363265	-0.926166	0.147089	0.0389521	0.535101
20	-0.429934	-0.282248	0.291318	0.110798	0.126632	-0.0658842	0.956965	0.809807		-0.495589	-0.882493	-0.363499	0.999943	-0.490118	-0.152435		-0.566078	-0.639932	0.336667	-0.367677	0.888595	-0.778973	0.698378	-0.659671	-0.49188	0.107455	0.131159	-0.0235923	0.926238	0.00840306	0.141539	-0.412914	-0.666996	-0.0721221	-0.292149	-0.0926234	0.944781	0.994721	-0.0237851	0.114353	-0.870522	-0.514104	0	-0.884667	0.911996	-0.425395	0.0729416	0.506588	-0.240198
21	0.72571	-0.231469	-0.198897	-0.102633	-0.0869708	-0.327874	-0.787128	-0.485443		0.453417	0.184208	-0.589956	0.662996	-0.096613	0.467039		0.748534	-0.631981	0.607413	-0.454777	0.184619	0.0733227	0.375955	0.769402	0.75999	0.576232	0.593448	0.763296	0.811848	-0.0416728	0.737656	-0.213946	0.690262	-0.994841	-0.0968233	0.800589	0.766601	0.987896	-0.382648	-0.0900672	0.345422	-0.0584934	0.914379	-0.996097	0.239382	0.437057	-0.350798	0.113137	0.076167
22	0.472684	0.835229	0.711836	-0.30593	0.575294	0.962788	0.596197	0.914735		0.355072	-0.60451	-0.916237	0.50776	-0.268836	-0.920764		-0.742847	-0.997105	0.768945	-0.21304	0.999475	-0.709079	0.0807216	-0.21831	-0.533634	0.562744	-0.424583	-0.492818	0.978726	0.405522	-0.497689	0.988799	-0.015478	0.941778	-0.962589	0.968095	0.960397	0.834787	0.977802	-0.813184	-0.421759	-0.401814	-0.936329	-0.946251	0.270502	0.375041	0.504252	-0.482179	0.479022
23	0.774648	-0.471825	-0.315364	0.0838016	0.571543	0.399407	-0.335945	-0.682289		0.106065	0.957038	0.129948	0.0796077	-0.30166	0.522067	-1	0.925032	0.941304	0.993737	-0.686538	0.775863	-0.196448	-0.258628	0.0159184	0.0943264	-0.417263	0.934026	0.983026	-0.174137	-0.471558	0.415445	0.697696	-0.903618	-0.0334358	0.210153	-0.0191602	0.901073	0.638893	0.355026	-0.00254452	0.0985034	-0.341549	-0.477168	-0.950837	0.783792	-0.0504229	0.19733	0.916477	0.998299
24	-0.0758558	-0.744643	0.444158	0.481795	-0.00723122	-0.136833	0.641599	0.534307		-0.175863	-0.105621	-0.716263	-0.00161681	-0.487092	-0.266978	1	-0.960075	0.737609	-0.909559	0.98484	0.382268	-0.01238	0.179572	0.873706	0.996679	0.906258	-0.116199	0.990911	-0.493239	0.607158	0.76481	-0.445642	0.793259	0.308114	0.801661	-0.738546	0.630218	0.789547	-0.376911	-0.479793	0.199793	-0.04444	0.259029	-0.577518	0.349344	-0.858605	-0.768056	-0.519988	0.125474
25	-0.186291	-0.242151	0.468926	0.0635851	0.484061	-0.81577	-0.999977	0.469155		-0.411812	0.999593	-0.999981	0.996435	-0.217669	0.154185		-0.738878	-0.0535198	0.996068	-0.864582	0.999997	-0.441477	0.52624	-0.893166	0.912899	0.12943	-0.250015	0.899272	0.999954	-0.573656	-0.823262	-0.964273	0.962851	-0.400713	-0.535898	0.934207	0.997238	0.992402	-0.688662	-0.997357	-0.618872	0.489151	-0.754712	-0.387991	-0.997663	-0.963343	0.472417	-0.354143	-0.299086
26	-0.977159	0.66663	-0.757197	-0.193805	-0.788425	0.0275406	0.884158	0.0343098		0.0231928	0.735722	0.167034	-0.397071	-0.903182	0.118615		0.544112	-0.48413	0.819601	-0.00230237	-0.119297	-0.0913852	-0.415101	-0.844765	0.0859994	0.0797817	0.0078893	0.950012	-0.967517	-0.177683	0.210229	0.531695	-0.693863	0.0744647	0.0365053	0.25729	0.474288	0.290753	-0.269583	-0.722051	-0.298275	0.181162	0.533374	-0.451147	-0.221586	-0.940056	0.476581	0.324863	0.445951
27	0.343126	0.754776	0.290459	0.137725	0.85797	0.226574	0.251796	0.241394		-0.334883	0.121891	-0.760362	0.748282	0.195912	-0.276937		0.0456429	0.450153	0.414671	-0.251893	0.488226	0.061274	0.0514436	0.0187937	-0.675444	-0.506591	-0.163417	0.885846	0.997895	0.676815	-0.20946	-0.600739	-0.189981	-0.363079	0.509475	0.522359	0.326101	0.610462	0.072757	-0.940385	0.31494	-0.298222	-0.447749	0.186554	0.426907	-0.863244	0.251865	0.0116001	0.391071
28	-0.749183	0.536402	0.313493	0.0247858	0.699625	-0.931747	0.176182	-0.578017		0.709646	0.162314	-0.439328	-0.126058	0.645352	0.598207		-0.279657	-0.799238	0.829987	-0.0214084	0.0778877	0.946704	-0.034998	0.356887	0.869991	0.0186625	0.210728	0.989408	-0.999679	0.401748	0.682926	0.418817	0.919521	-0.598641	0.858196	0.913357	0.999999	0.999985	0.812727	0.791285	0.207504	-0.00499162	0.148657	-0.894427	-0.0989275	-0.187599	0.343793	0.434905	0.461735
29	0.303002	0.999885	-0.743501	0.115199	0.982147	0.922519	0.986862	0.941669		-0.988499	0.993324	-0.720487	-0.576683	0.156558	-0.99116		0.822148	-0.956742	-0.833953	-0.428924	0.958288	-0.0369398	-0.347053	0.994794	-0.655143	-0.346702	0.470536	0.987551	0.997296	-0.523686	-0.756603	-0.734511	0.983031	-0.471552	-0.446254	-0.780075	0.989352	0.978637	0.829424	-0.899836	-0.922155	-0.912642	-0.411921	0.293453	0.415961	-0.998432	-0.708016	-0.989511	-0.654152
30	-0.00792054	-0.975906	-0.19996	0.623312	-0.83995	-0.176211	0.317721	-0.977839		-0.564684	0.643102	-0.632853	0.464711	-0.446544	-0.999179		0.604732	0.637568	0.975988	-0.484316	-0.628019	0.372485	0.842427	0.614063	0.825653	0.161046	-0.621752	0.944019	0.912359	0.304965	0.734073	0.845064	0.950871	0.161321	0.966924	0.917345	0.880471	0.962731	0.772557	-0.979468	0.133065	0.864051	-0.95448	-0.672673	0.555728	0.888317	0.314238	0.748482	0.20667
31	-0.14319	-0.012684	-0.0359767	0.927641	-0.207649	0.779012	-0.155586	0.0751059	0	0.977424	0.937355	-0.243523	-0.171421	0.242917	0.22539		-0.458601	-0.808736	0.57893	-0.968557	0.208881	-0.465627	-0.462181	-0.993183	-0.142137	-0.160837	0.113419	0.844087	0.0951297	0.361137	-0.347821	0.738798	-0.867829	0.626278	0.933112	0.988834	0.970312	-0.432355	0.215587	-0.712761	0.0952523	0.476393	0.764051	-0.519456	0.571086	0.822415	0.951298	-0.890881	0.858713
32	0.0126009	-0.914039	0.0435906	0.800084	0.339093	-0.282096	0.198095	0.0585727	0	-0.565042	0.325942	0.206382	0.0934341	0.534987	0.159232		0.307555	-0.122543	-0.564684	0.94326	-0.136358	0.238709	0.0655155	-0.320045	0.431404	-0.872408	0.0278637	0.725633	-0.587073	-0.1258	0.358905	-0.376131	0.767305	0.508805	0.9226	-0.271066	0.499449	0.989052	-0.849097	-0.0948413	0.241355	-0.190447	-0.100516	-0.12457	0.355439	0.951709	-0.278058	0.568282	0.4525
33	-0.730931	-0.221678	0.477092	0.570345	-0.863322	-0.232573	-0.979493	0.349886		0.481795	0.893301	-0.49269	0.744647	0.972704	-0.272956		-0.0132658	0.998935	0.845631	-0.433394	0.0191048	-0.617555	-0.156778	0.656618	-0.707107	-0.77588	0.97458	0.905335	0.67313	0.481068	0.00394215	0.430841	-0.885335	-0.576157	0.586159	0.398982	0.999892	0.996459	-0.199264	-0.932738	-0.378692	0.119884	0.521377	-0.993435	-0.651716	0.198662	-0.252467	-0.656866	-0.83378
34	-0.22418	-0.482745	-0.251925	0.867633	-0.504684	-0.115616	0.277161	0.124603		-0.535954	0.712467	-0.432857	0.434968	-0.461393	0.0213751	-1	0.221944	0.100725	0.0611101	-0.569953	-0.0255279	0.0440209	-0.21237	-0.702345	0.662995	-0.977684	-0.17534	0.924274	0.704521	-0.658024	-0.369307	0.159618	0.537748	-0.484908	0.241146	0.185962	0.449418	0.533692	-0.192299	0.145555	0.47593	-0.392321	0.248326	0.159291	0.0692963	0.49597	-0.175189	-0.0202614	0.0292558
35	-0.0955607	0.330263	-0.33282	0.860055	-0.952894	0.157371	0.921337	0.999899		-0.17674	0.785077	-0.548239	-0.738485	0.989786	-0.0224831		-0.541867	-0.135028	-0.726318	-0.693313	0.897432	0.293557	-0.103219	0.783202	0.695611	-0.850732	0.259352	0.665075	-0.652801	0.560309	0.230727	0.694348	0.258879	-0.119604	0.952224	0.011787	0.996529	-0.732323	0.955887	-0.327968	-0.592105	0.684859	-0.540758	-0.218956	0.654454	0.290283	0.767644	0.969221	0.947933
36	-0.19671	0.0987113	0.122611	0.794812	-0.695795	-0.512263	-0.172196	0.107482		-0.427659	0.759138	-0.0461356	0.61328	-0.709306	0.108908		-0.707107	-0.649399	-0.873568	-0.465637	0.0452026	-0.270515	0.179303	-0.995653	-0.497512	-0.760919	0.0319924	0.380351	-0.984874	0.397826	-0.43071	-0.254725	-0.834546	0.966343	0.728751	0.253569	0.914855	0.720858	-0.698239	0.485643	-0.284059	0.255336	-0.178885	-0.656886	-0.327178	-0.172096	-0.702371	0.82503	-0.583865
37	-0.820451	-0.978828	-0.472771	0.99636	0.944695	0.460632	-0.194754	-0.194151		-0.662007	0.814467	-0.51622	0.595871	-0.662893	-0.0210924		-0.202606	0.476499	0.319475	-0.340761	0.277726	0.266944	-0.788347	0.303013	-0.874157	-0.991239	-0.294316	0.96489	-0.982732	-0.0555605	-0.860717	-0.792329	0.864175	0.13791	0.593241	-0.401347	0.63494	0.743163	0.871576	-0.990121	0.621575	-0.270746	0.920281	-0.524206	-0.393919	-0.942023	1	0.251652	-0.758985
38	0.715474	0.999325	0.242536	0.999612	-0.565497	-0.0471174	0.992887	0.752903		-0.995893	0.701271	0.68352	-0.555378	0.418659	-0.186587		0.528516	0.426757	0.837271	0.762477	0.990694	0.331108	-0.317622	0.918311	0.927249	-0.99342	0.0983093	0.601183	0.976368	0.990324	-0.0227759	-0.973476	0.960824	-0.68165	-0.955	0.20601	0.937181	0.427191	-0.746335	-0.974639	0.702742	0.156369	0.151111	-0.653365	0.245702	-0.720674	-0.761291	0.572799	0.785718
39	-0.670819	-0.454964	0.235246	0.918169	0.266586	-0.329683	0.65478	0.864133		0.805521	0.955187	-0.950358	0.138795	-0.410787	0.122307		-0.60077	0.253454	0.77448	-0.283138	0.784328	-0.155367	-0.37289	-0.9495	0.833307	-0.569316	0.571946	0.752577	0.795299	-0.299676	0.914118	0.96206	-0.882686	0.82408	0.539491	0.996736	0.478779	-0.956459	-0.682149	0.999988	-0.696816	-0.8268	-0.0257646	-0.388803	0.166809	-0.844137	-0.0939735	-0.783248	-0.00389861
40	-0.204467	-0.982872	-0.917157	0.964467	-0.5391	0.705743	-0.0303504	-0.911524		0.274721	0.970143	0.676849	0.757539	-0.999537	0.195621	-1	0.00637742	0.472912	0.804515	-0.580418	0.264246	-0.234197	-0.42079	0.386021	0.271627	-0.391355	-0.258736	0.999935	0.225528	0.877421	-0.999051	-0.266944	-0.977853	-0.87988	0.80085	0.419058	0.986644	0.393352	-0.978217	0.506248	0.854318	0.955419	0.44051	-0.908167	0.952282	0.985212	-0.8014	0.581448	0.968958
41	-0.876216	-0.913596	0.252281	0.950226	0.105919	-0.899814	0.032904	-0.711966		-0.699048	0.999813	-0.924431	-0.490135	0.181485	0.434845		0.999968	-0.754606	1	0.860292	0.794211	-0.388057	-0.180052	-0.991611	-0.807963	-0.954677	-0.338437	0.977447	0.998763	0.998624	0.933214	-0.541875	0.994418	0.963196	0.0991112	-0.9963	0.92324	0.773291	0.778087	-0.924576	-0.734915	-0.978127	-0.560371	-0.965927	0.938152	-0.96041	-0.638366	-0.221621	-0.680934
42	-0.610473	-0.0393706	-0.789751	0.983987	-0.94613	-0.388813	-0.997124	0.203954		0.903333	-0.704844	-0.203025	-0.0581294	-0.3395	-0.807548		-0.951479	0.478852	0.683788	-0.848604	0.992972	0.208071	-0.508714	0.962029	0.997547	-0.871329	0.0837052	0.952939	-0.987203	0.33733	-0.957702	-0.70185	-0.998484	-0.55201	0.490535	0.663255	-0.887387	-0.812648	0.182127	0.357647	0.282166	0.501036	0.642612	-0.598895	-0.349559	-0.811285	0.405963	0.290482	0.280092
43	-0.99689	-0.521763	0.724776	0.678423	0.606826	0.476466	0.999711	0.294632		0.422042	0.409164	0.476283	-0.197988	-0.185771	0.377145		0.765146	0.168019	0.193719	-0.22826	0.751062	0.144706	-0.313192	-0.900491	0.228369	-0.832425	0.406641	0.599908	0.672898	0.217887	-0.0380486	0.924973	0.91101	0.982695	0.700238	0.162845	0.838633	-0.0877625	0.280107	-0.112821	-0.287071	-0.103173	0.0916562	0.0118475	0.0736954	0.217846	-0.153707	-0.267779	0.132444
44	-0.335294	-0.985744	-0.365305	0.832781	-0.445152	-0.0179343	-0.999358	0.093446		0.612876	0.248849	-0.343466	-0.388617	0.776422	-0.217134		-0.779163	-0.5779	-0.956142	0.985578	0.156611	0.114541	-0.332573	0.20601	-0.802065	-0.420079	-0.162601	0.852098	-0.821207	0.541926	0.6	-0.839466	-0.967927	-0.234259	0.714972	0.867643	0.874833	0.984907	-0.02902	-0.446303	0.69651	0.145003	0.126723	-0.0422159	-0.213619	0.901551	-0.0426961	0.0485064	-0.665371
45	0.789852	-0.52059	-0.881345	0.599356	0.470308	-0.388057	0.698995	0.0532576		0.193833	-0.923824	-0.835637	-0.553197	-0.905024	0.502463		-0.624114	0.99333	0.648708	-0.842348	0.311663	-0.89774	-0.296736	0.938447	-0.268001	0.720866	0.0940737	0.736454	-0.934468	0.701643	0.822104	0.977421	-0.611292	-0.663719	0.475933	0.956783	-0.995771	-0.563098	-0.646636	-0.255937	-0.982896	-0.834576	0.383336	-0.276241	-0.544988	-0.0966114	-0.80255	0.967115	0.998881
46	-0.572589	-0.98022	-0.127095	0.789592	0.040557	-0.343274	0.981393	-0.0207747		0.0763994	-0.555987	-0.319442	-0.810041	-0.64583	-0.224986		0.954622	-0.699281	-0.963614	0.328802	0.999627	-0.767582	-0.271156	-0.903377	0.999609	0.51692	-0.220962	0.947884	0.989429	0.535542	-0.257303	0.727174	-0.716386	-0.981652	-0.265403	-0.425074	0.680638	0.442538	0.54281	-0.776393	0.288256	-0.028466	0.433294	-0.682994	0.732466	0.118973	0.15583	-0.992204	-0.999086
47	-0.290283	-0.858866	0.92723	0.889004	-0.991265	0.845258	0.888838	-0.743501		-0.377297	0.0909417	-0.0228512	0.629515	-0.633363	0.999275		0.998814	0.220261	0.900124	-0.885832	0.975544	-0.489468	-0.475338	0.960386	-0.948525	0.788041	0.307003	0.842203	-0.967636	0.839241	0.997974	0.999694	-0.560435	0.00502867	0.930193	0.272719	0.944631	0.914061	0.717967	-0.759257	-0.849187	0.949067	-0.67795	0.990542	0.0870181	0.15998	0.745457	0.285906	0.998604
48	0.257892	0.371391	-0.568595	0.943151	-0.231911	-0.0506774	0.59718	0.176579		-0.663159	-0.177852	0.0980107	-0.420058	0.118357	-0.0178013		-0.973	-0.48609	0.279003	-0.27388	-0.41116	0.319041	-0.669361	-0.688111	0.777854	0.978292	-0.70224	0.747867	-0.629748	0.146759	-0.273446	-0.850265	-0.297257	0.272322	0.934453	0.65094	0.117355	-0.0670755	0.954036	0.179875	0.404003	-0.286171	0.0110858	-0.527501	0.0164054	-0.719495	0.690682	0.360682	-0.0886548
49	-0.884872	-0.999381	0.969902	0.55725	0.905363	0.622841	-0.91398	0.667248		0.991281	-0.393041	-0.950972	0.297487	-0.668619	-0.205046		0.886854	-0.179107	0.314591	0.935379	0.967274	-0.623022	-0.531809	-0.101742	-0.14047	0.972409	0.948137	0.93196	0.898154	0.333142	0.695215	0.994473	0.970615	0.215631	0.778115	-0.947106	0.397942	0.923119	-0.0185153	-0.999936	0.750766	0.504799	0.784689	0.756823	0.883002	-0.189859	0.667738	0.502417	0.947181
50	-0.989477	-0.656018	0.176664	0.924095	0.906483	0.999778	-0.924017	0.957761		-0.978791	0.595137	-0.631773	-0.56921	0.0590683	0.529999		0.30266	0.989982	0.750248	-0.780553	0.223553	0.217674	-0.693444	-0.986691	0.426247	0.804433	-0.418273	0.999158	-0.979378	0.167101	0.84753	0.974308	-0.870563	0.549702	0.664364	0.975296	0.824689	-0.593177	-0.272807	0.963764	-0.528558	-0.68477	0.35075	-0.83871	0.992734	-0.52195	0.152139	-0.633633	0.0573523
51	-0.994446	-0.194454	0.013141	0.828708	-0.514496	-0.505293	0.976453	0.071489		-0.999983	0.9019	-0.154607	-0.609478	0.410772	-0.146753		-0.326139	-0.951615	0.992614	0.900897	0.17681	-0.105902	-0.763056	0.419309	0.982979	0.821987	0.227726	0.98001	0.648266	0.492264	0.510186	-0.597436	0.981194	-0.852816	0.741	0.82586	0.999521	0.0168043	0.967337	-0.941479	0.20839	-0.507462	-0.385363	0.611596	0.222038	-0.659995	-0.523203	0.995401	-0.986916
52	-0.932058	-0.95366	-0.184289	0.984294	-0.92231	0.935194	-0.999825	-0.626687		0.803557	-0.442006	-0.986115	-0.938494	-0.0815122	0.191719		0.963456	-0.350061	0.936816	-0.999967	0.752577	0.866906	-0.314955	0.91898	-0.958786	0.577662	-0.350674	0.785388	0.992721	-0.0119445	0.99998	-0.106065	0.99909	0.0512148	0.999677	0.265481	0.660424	0.984283	-0.482713	0.817437	-0.40644	-0.840297	0.563251	-0.934619	0.715051	-0.176211	-0.993555	-0.201127	0.89423
53	-0.446721	-0.618284	-0.341743	0.995844	0.880175	-0.937186	0.801157	0.999261		0.620794	-0.968483	0.978221	-0.732019	-0.312566	-0.918484		-0.466684	0.602163	0.883054	-0.879424	0.929899	-0.972116	-0.877912	-0.744759	0.993721	0.962906	0.829515	0.984888	-0.503208	0.799625	0.598997	-0.759837	-0.982113	-0.761306	0.947492	0.443589	-0.972387	0.120331	-0.788658	-0.978214	0.527414	0.840978	-0.65715	-0.6835	-0.970546	-0.694883	-0.49001	-0.0586402	-0.551592
54	0.486543	-0.0714728	-0.246661	0.996837	-0.234273	0.133105	-0.118702	0.0916373		-0.742564	-0.0765269	-0.700302	0.672673	-0.225125	-0.168414		0.258624	0.497478	0.878743	-0.166838	0.42573	-0.46724	-0.327426	0.57275	0.535731	0.993774	-0.0374414	0.991249	-0.486898	0.726059	0.713315	-0.91374	0.789827	0.550007	0.576086	0.459864	0.140053	-0.161667	-0.232156	-0.0439527	-0.360548	-0.236887	0.065467	-0.186759	-0.127522	-0.970143	0.220245	0.425314	0.397449
55	-0.426842	0.0556381	0.37918	0.900673	0.0283692	-0.164206	-0.117818	-0.217442		0.727065	0.265254	-0.0657178	0.996121	-0.306082	-0.351895		0.223509	-0.941631	0.0844645	-0.350896	0.842492	0.837611	-0.856444	0.720181	-0.982327	0.979573	-0.370344	0.64349	-0.807232	-0.0492535	0.616509	0.980531	-0.969575	-0.612842	0.982836	-0.859469	0.716383	0.493491	0.131071	-0.715114	0.339526	0.434392	-0.726626	0.00260755	0.463629	-0.272382	0.953824	-0.544783	-0.156777
56	0.0105479	0.696894	-0.515972	0.960807	0.385883	0.456751	0.216581	0.203824		-0.932353	-0.771	0.380932	0.938841	-0.0997781	0.427132		-0.500845	-0.820261	0.829771	0.903868	0.567434	-0.0685701	-0.0300854	0.945373	0.885113	0.993642	0.0967287	0.942069	0.807492	-0.0965035	0.808056	-0.976933	0.909848	-0.684695	0.646541	0.649897	0.0797452	0.178558	-0.307057	0.225263	-0.0809083	0.130715	0.648568	-0.456645	-0.128537	-0.420937	0.600549	-0.379248	0.782308
57	0.494401	-0.723519	0.559812	0.821793	0.883204	-0.561687	0.479421	0.292854		0.53392	0.0287421	-0.637776	0.571819	-0.105204	0.200851		0.52077	0.883944	0.038173	-0.783209	0.990096	-0.437098	-0.988181	-0.925058	0.617625	0.985651	-0.561813	0.6177	-0.126418	0.122079	0.640665	0.74278	0.33415	0.653485	0.966809	-0.923	0.999508	0.803633	0.5547	-0.390752	-0.570082	0.215587	-0.547864	0.127651	0.868593	0.0803085	-0.83366	0.542221	0.457981
58	-0.308505	-0.954058	0.156284	0.770324	0.458221	0.666331	0.983353	-0.823333		-0.786659	0.998817	0.172067	-0.308949	-0.462854	-0.432278		-0.117137	0.798779	0.935368	0.526355	0.644525	0.708365	-0.976334	0.757467	-0.636895	0.918981	0.94644	0.749951	0.967913	0.75722	0.692607	-0.736641	0.579361	-0.319881	0.633666	-0.980521	-0.817958	-0.107291	0.122219	0.851258	0.999802	-0.0797452	0.621994	-0.99895	0.983968	-0.00736524	0.457104	0.226675	-0.715454
59	0.254837	-0.875862	-0.779815	0.631704	-0.521776	-0.506536	-0.273522	-0.380375		0.74183	-0.90311	-0.0263314	-0.296627	-0.530214	-0.270317		-0.683283	-0.855607	0.273517	0.362844	0.86995	-0.44929	-0.204647	-0.841581	0.330475	0.981248	-0.929694	0.503917	-0.888289	0.0976663	0.0425843	-0.977351	0.506422	-0.476479	0.844554	-0.969865	0.428653	-0.999998	-0.990117	-0.525436	0.333847	-0.83976	0.274866	-0.0374187	0.314183	-0.49886	0.441838	-0.435329	0.392161
60	-0.437071	0.791234	0.996951	0.995639	0.723503	0.836204	0.165743	0.112129		-0.988506	0.276023	-0.99913	0.384755	0.982458	-0.174691		0.887944	-0.9977	0.471772	0.751246	0.746181	0.999261	-0.989183	0.949312	-0.341543	0.855863	0.12093	0.997332	0.997492	-0.875697	0.388539	0.997716	-0.936554	-0.462805	0.123747	0.999919	0.99543	-0.122108	0.352047	0.37665	-0.98387	0.968336	-0.41162	-0.991391	0.222782	-0.453403	0.985155	-0.923776	-0.489074
61	0.500765	-0.0632534	-0.669543	0.879292	-0.697481	-0.426445	-0.866291	-0.454256		0.282	0.181592	-0.372239	0.105857	-0.410401	-0.750162		-0.243854	0.882971	0.121541	0.268408	0.992422	0.0548307	-0.788488	0.949966	-0.95468	0.794886	-0.0679718	0.621059	0.851616	0.94876	-0.0345615	-0.686083	0.864047	0.427039	0.290029	0.500278	-0.687965	-0.62229	-0.292488	-0.694953	-0.845489	0.841974	0.24888	0.506549	-0.766596	-0.334871	0.996546	0.420153	-0.31986
62	0.844254	-0.567655	-0.0474749	0.889987	0.753443	-0.05227	-0.989493	-0.693437		-0.962247	-0.0120473	0.824957	0.971654	-0.791879	-0.114427		-0.363964	-0.0617133	0.130349	-0.969015	0.704904	0.247696	-0.991032	-0.596966	0.977176	0.527844	0.174106	-0.431678	-0.845335	-0.987011	0.341527	0.690257	-0.916773	-0.92249	0.0146639	-0.532505	0.315687	-0.540934	0.0696166	0.926067	0.99695	-0.347771	0.513135	-0.0625173	0.172975	0.0140126	0.313571	0.872781	0.75115
63	0.988174	-0.784785	0.191102	0.76913	0.514104	-0.999865	0.969866	0.921218		0.408255	-0.252928	-0.894427	0.37119	0.959346	0.993116		-0.72706	-0.505118	0.396717	0.960397	0.998488	-0.469155	-0.90874	-0.57727	0.753084	0.877122	-0.171483	0.777647	0.977425	0.681219	0.662306	-0.808114	0.974869	0.78054	0.872122	-0.624102	-0.0440623	0.95568	0.452883	-0.826638	0.916227	0.0778877	-0.959629	0.968664	0.232975	-0.458885	0.730414	0.981022	-0.503455
64	0.2209	-0.770667	-0.813733	0.497659	0.884242	0.998648	-0.809769	0.448626		-0.764488	-0.842712	0.204721	0.428009	-0.222726	-0.787199	-1	0.7667	0.735931	0.220706	-0.850545	0.474746	0.710482	-0.602675	0.945957	0.996546	0.633797	0.995295	0.884317	-0.979073	-0.772185	0.7458	-0.723917	0.989359	-0.223049	0.118213	0.860618	-0.259416	-0.6255	-0.148532	0.950649	-0.83514	0.849111	0.899699	0.525269	0.911489	0.0510549	0.807763	0.347184	-0.496139
65	-0.0299012	-0.716822	0.790623	0.956836	-0.438871	-0.193727	0.661097	-0.582598		0.57912	0.40645	0.388248	0.176121	0.0927492	0.412542	1	-0.962651	0.332924	0.0235942	-0.775877	0.934724	-0.401661	-0.99487	-0.407509	-0.353974	0.332976	-0.900552	0.542457	0.56893	0.401351	0.647031	-0.998997	-0.458135	-0.654865	0.980922	-0.998783	-0.946429	0.651785	0.818987	0.886527	0.51374	-0.895462	-0.255587	0.0134396	0.103442	0.00614239	0.579349	0.751585	-0.039968
66	0.807337	-0.0182128	0.258628	0.966009	0.2785	-0.470356	-0.834798	0.664684		0.504646	0.475895	-0.184289	0.524715	-0.476574	-0.226199	-1	0.508369	-0.72032	0.543378	0.918628	0.465485	0.646742	-0.996523	0.421686	0.618944	0.181852	-0.0146504	0.0907916	0.408576	0.999969	0.723126	-0.999991	-0.297416	-0.111236	0.0771079	0.880907	-0.243455	-0.137862	-0.0965776	-0.130125	-0.919235	0.810276	0.0181788	-0.551867	0.947687	0.159121	-0.4989	-0.0605913	0.0814891
67	0.252039	0.100322	0.0323184	0.826171	0.370835	-0.242886	0.515832	0.597011		-0.541331	-0.872922	0.599157	0.452202	0.278058	-0.337954	1	0.992837	0.879228	-0.266302	-0.87832	0.0771334	0.546093	-0.753596	-0.388402	0.0139262	-0.523153	0.301352	0.195361	-0.924358	-0.587124	0.999945	0.474266	0.345781	-0.666981	0.477161	-0.378813	0.947492	-0.635874	-0.721764	0.991378	0.460742	-0.928586	-0.315248	-0.192381	0.1541	0.273269	0.149206	-0.214261	0.537061
68	-0.744219	-0.850724	-0.999306	0.715415	0.750938	0.717107	0.866231	0.611872		-0.393919	-0.85932	-0.952632	0.337246	-0.120563	0.62091	-1	-0.993729	-0.996575	0.820127	0.21693	0.793802	-0.486182	-0.850205	-0.776918	0.785123	-0.403948	-0.511484	0.818814	0.997234	0.883462	0.989389	0.92938	-0.988955	0.466759	0.991537	0.66229	-0.797478	-0.527223	-0.511223	0.922935	0.83365	0.813584	0.548883	0.650791	0.276979	0.200396	0.858305	0.397817	-0.0296781
69	0.957438	-0.0868872	-0.994569	0.279756	-0.930104	-0.943716	-0.794927	-0.58329		-0.778825	-0.0725357	0.864897	0.79964	0.00964275	0.423685		0.0513924	0.201007	-0.318558	-0.789022	0.385593	-0.494715	-0.985857	0.286857	-0.453077	-0.314427	0.187476	0.841783	-0.983266	-0.494975	0.455068	0.85883	0.978502	-0.801493	0.632079	-0.813635	-0.432365	-0.511321	-0.187281	0.924374	-0.941792	-0.776821	-0.674871	-0.724999	0.0859281	0.193229	0.603413	-0.480062	-0.556491
70	-0.414826	-0.346571	0.954741	0.334124	-0.999985	0.168964	0.807048	-0.722804		0.169907	-0.541178	-0.918046	0.27098	0.086808	-0.303487		0.995965	-0.779899	-0.913122	0.776326	-0.516894	-0.359194	-0.702577	0.948342	0.934511	-0.54182	-0.0126974	0.974561	-0.997253	0.123947	0.902008	-0.965918	-0.954718	0.798463	0.976779	0.00580261	0.643902	0.0682473	-0.374046	-0.338259	-0.0074072	0.762863	-0.0813482	-0.73637	-0.542686	0.995778	-0.876856	0.0293991	0.968698
71	0.380059	-0.996134	0.6	-0.587526	0.450371	0.513539	-0.995189	-0.141122		0.810021	-0.752969	0.516347	0.654821	-0.00711496	-0.94291		0.0124601	-0.933038	0.936623	-0.936737	0.990847	0.937222	-0.945436	-0.859335	-0.749285	-0.682238	-0.416977	-0.875103	0.995737	0.720658	0.0330398	0.975159	0.40946	-0.812811	0.994152	0.719425	-0.998767	-0.261478	-0.540111	0.557105	-0.778565	-0.778945	-0.817731	-0.408063	0.886708	0.0429264	0.589603	0.560245	-0.016564
72	0.537215	-0.515733	-0.944497	-0.90575	-0.359609	0.550842	0.605083	0.621923		-0.204721	-0.997726	0.98546	0.172727	0.576064	-0.0213474		0.372794	0.315375	0.8369	0.95725	0.223113	0.951411	0.128424	0.856456	-0.637727	-0.373003	0.344937	0.897327	-0.868243	-0.41894	0.994505	0.971728	-0.504883	0.882618	0.996396	-0.976568	0.960801	-0.808553	0.326553	0.148826	0.575115	0.997534	0.87163	-0.121141	0.997603	0.838544	0.995663	0.569473	-0.578587
73	0.858508	-0.316228	-0.943707	-0.772819	-0.318502	-0.27679	0.434365	-0.0748257		0.990891	-0.868548	0.606098	0.934969	-0.0222167	-0.565872		-0.146249	0.326749	0.945687	-0.975458	0.499279	-0.319456	-0.577382	-0.289921	0.93105	-0.193241	-0.729841	-0.0185583	-0.988372	-0.120472	0.587331	-0.954226	-0.686521	-0.99801	0.999963	0.0806097	-0.37283	0.117121	-0.80383	0.582239	0.875628	-0.95104	-0.869789	-0.653118	0.0474524	-0.199287	0.543422	0.547862	0.758384
74	-0.0621507	-0.769329	-0.0237557	-0.955938	0.718102	-0.400142	0.878981	0.21076		-0.959586	-0.385286	-0.509321	0.319447	-0.573236	0.916835		-0.813914	0.874811	0.499926	0.362951	0.859407	0.821679	-0.947167	0.915269	-0.741746	-0.328531	0.590778	-0.643246	0.454326	0.970573	0.792412	-0.961601	0.974931	-0.789472	0.989791	0.956352	0.958909	-0.590017	0.562534	-0.948415	0.910549	0.874628	0.709446	0.101877	0.600449	0.912054	0.487605	0.871174	-0.167151
75	0.99743	-0.0703101	0.884441	-0.808506	0.474861	0.431173	-0.273043	0.955488		-0.0378603	-0.695207	-0.60163	0.672492	-0.993884	0.110058		0.938141	0.650228	0.959048	-0.0649035	0.892463	-0.105075	-0.33837	-0.998997	0.991751	-0.555997	-0.109572	0.263117	0.969397	0.60089	0.868675	0.686884	-0.848559	0.997489	0.943649	0.314518	-0.424883	-0.138243	0.759039	0.708163	-0.519692	-0.859367	-0.783498	0.385952	-0.419735	0.522163	0.0862574	-0.885098	0.656016
76	0.301467	-0.944683	0.0694746	-0.992988	0.173444	-0.527585	0.967704	-0.905164		-0.955779	-0.991843	0.711876	0.211412	-0.0764716	0.0995037		0.694292	-0.328336	-0.859766	-0.943801	0.447214	0.0745452	0.610053	0.920666	-0.981344	-0.292742	-0.257663	0.848479	0.898084	-0.951643	0.799437	-0.977248	-0.983189	0.578271	0.999857	0.996749	0.961124	0.929456	0.316228	0.903878	0.725396	0.957115	0.99998	-0.845058	0.646024	0.927046	-0.389114	0.994505	0.919495
77	-0.215999	-0.0726233	-0.860031	-0.999714	-0.462958	0.0204418	0.0157875	0.473514		-0.129387	-0.998211	0.170207	0.2074	-0.630667	-0.051188		0.374826	0.968177	0.692047	0.920691	0.190443	0.845798	0.480011	-0.578901	0.779768	-0.0978391	0.590145	0.554118	-0.441138	-0.530916	0.645205	0.966974	-0.300895	0.1607	1	0.676331	-0.723052	-0.936469	-0.997729	-0.993745	-0.992017	0.936717	0.30241	-0.236238	-0.230344	0.26806	0.812274	0.539678	0.0520693
78	0.211003	-0.159448	0.558139	-0.983411	0.948683	-0.49773	-0.522312	0.756823		0.761705	0.342079	-0.611637	0.650791	0.575916	-0.693577	-1	-0.974651	0.616308	-0.660011	-0.491321	0.650058	0.993346	0.135687	0.736255	-0.223898	-0.00483086	0.550955	-0.470197	0.833235	0.913274	0.999778	-0.910767	0.994582	-0.487514	0.840144	0.188606	-0.437325	-0.15976	-0.434237	0.112446	0.146844	-0.916968	0.243896	-0.902481	-0.457957	0.159098	-0.987665	-0.999452	-0.236322
79	-0.974369	-0.965392	-0.524097	-0.999717	-0.800371	0.129196	-0.0121098	-0.771322		-0.569435	0.554355	0.382785	0.993655	-0.842812	0.318136	1	-0.392647	-0.960599	0.894427	-0.792094	0.997928	0.745636	-0.0604275	-0.993753	-0.0500625	0.200318	-0.26378	0.184369	-0.8843	-0.996898	0.0944411	0.736908	-0.821394	0.376955	0.760516	0.130775	-0.211521	-0.728781	-0.235046	-0.350461	0.990345	0.602407	-0.829183	0.0531461	-0.198139	-0.0833591	0.436219	0.844033	0.883854
80	-0.384733	-0.521683	0.196116	-0.910185	-0.116137	-0.454354	-0.958147	0.6896		0.740241	0.0515443	-0.88667	0.389724	-0.273475	-0.326069		0.53444	0.929754	0.16679	-0.497848	0.253818	0.456395	0.0872888	0.854649	0.648466	0.400056	0.898244	-0.914704	-0.333207	0.994356	0.99393	-0.939237	0.538225	-0.663736	0.942783	-0.981581	-0.461252	-0.61835	-0.70188	0.97148	-0.914216	-0.807976	0.789469	0.425136	0.694855	0.370225	0.871268	0.740655	-0.611596
81	-0.994731	-0.908159	0.287856	-0.999982	-0.103632	-0.276937	0.989595	0.97927		-0.867643	-0.799278	-0.144565	0.172666	0.0272273	-0.241717		-0.753268	0.209382	0.915315	0.729141	0.894669	-0.588958	-0.384645	-0.00247065	-0.403468	0.891739	-0.425136	0.980115	-0.918287	0.0716665	-0.0606131	-0.720365	-0.84074	0.995091	0.832246	0.49311	0.0957124	-0.455818	-0.236823	-0.990841	-0.136359	-0.582413	-0.0251003	0.0683939	-0.259839	0.258615	0.71637	0.681726	0.566423
82	-0.0481997	-0.866523	0.499208	-0.74488	0.0171403	0.195074	-0.805856	0.483127		0.824184	0.2781	0.452768	0.348108	-0.180553	0.33684		-0.784988	0.0929761	0.103231	-0.655046	0.457077	0.340754	0.229137	0.468493	0.461273	0.992655	-0.284598	-0.974641	-0.721875	0.624948	0.524056	-0.533131	0.667112	-0.969966	0.778487	-0.34024	-0.900349	0.996898	-0.341466	-0.140481	0.384057	0.464711	0.187835	-0.0830455	-0.347807	0.2947	0.523499	0.386035	0.561541
83	0.591756	-0.0383199	-0.206115	-0.951885	0.981314	0.99578	0.853359	0.696528		-0.814221	-0.0208438	-0.821203	0.196116	0.450487	0.010092		0.956615	-0.98432	0.885859	0.840111	0.788148	0.999133	-0.70223	0.994063	0.814336	0.82726	-0.164399	0.969935	-0.974137	0.754872	0.494899	0.988555	-0.198606	-0.138196	0.95125	-0.475007	-0.195233	-0.963579	-0.535824	-0.981644	-0.945665	0.815288	-0.322927	-0.197725	0.410365	0.829588	0.996147	-0.536306	-0.322427
84	0.623077	-0.31999	0.385087	-0.743508	0.885832	-0.641139	0.716878	-0.847075		-0.902639	-0.491944	0.807018	0.325364	-0.837218	-0.143357		-0.91215	0.287348	0.664017	0.434084	0.945716	0.952598	0.127708	-0.978577	-0.542512	0.713487	0.237273	0.535363	-0.93278	-0.964082	0.400765	-0.994966	-0.0523475	0.797326	0.859091	0.0954326	-0.0831779	-0.0532452	-0.375872	0.499524	0.963837	-0.897697	-0.162715	0.316589	-0.2322	0.277492	0.912756	0.858259	0.978221
85	-0.33071	-0.992085	-0.955524	-0.87427	0.59562	0.9826	-0.902391	0.994384		0.991801	0.253215	0.994309	0.764719	0.314654	0.854558		0.932338	-0.852601	0.457206	-0.931504	0.946882	0.566875	-0.300994	-0.850703	0.969366	0.704702	-0.0257225	-0.853742	0.993692	0.972246	0.992482	0.937749	0.993411	0.99615	0.995708	0.720198	-0.688021	0.917526	-0.205838	0.618539	0.457206	0.845066	0.906379	-0.512552	0.949364	0.145758	0.541355	0.996905	0.247383
86	0.0361012	0.00927604	0.509802	-0.762573	-0.498088	-0.960549	-0.0112352	0.624372		-0.0607911	-0.778905	-0.867643	0.510183	-0.347998	-0.131844		-0.65715	0.94299	0.985651	0.546863	0.708489	-0.0233173	-0.861055	0.883741	0.207305	0.771223	-0.010213	-0.447214	-0.131475	-0.999269	0.266984	0.670913	-0.999178	-0.850483	0.970678	-0.899714	0.846994	-0.987148	-0.606403	-0.909474	-0.593961	0.466912	0.61013	-0.567901	-0.963993	0.469428	0.663363	0.151196	-0.406232
87	-0.169195	0.15337	-0.741912	-0.537475	-0.249649	-0.159104	0.451997	-0.754289		-0.60251	-0.873427	-0.957081	0.957826	-0.985869	-0.287189		0.788543	0.542354	0.999985	-0.92562	0.902441	-0.622438	-0.508508	-0.94094	-0.18137	0.672783	-0.648752	-0.994538	0.55666	-0.74049	0.157115	0.475779	0.150105	0.952651	0.715096	0.218066	-0.613288	-0.155209	-0.17651	-0.12068	-0.725559	-0.753711	-0.790685	0.592076	0.998233	-0.0742863	-0.880308	0.978368	0.999812
88	0.999325	-0.447214	-0.131431	0.823878	0.434135	0.0516551	0.999996	0.721988		-0.562129	-0.177907	-0.0132147	0.961524	-0.188271	0.146279		0.298803	-0.750216	0.0615917	-0.927948	0.981708	-0.00104822	-0.890007	-0.938968	0.744545	0.396754	0.33855	-0.662828	0.966689	0.643368	0.598601	-0.778907	0.707107	-0.0814066	0.856954	0.0180911	-0.10334	-0.80703	0.0879828	0.912679	0.854125	-0.62391	0.08644	-0.0609684	-0.242363	0.585451	-0.979004	0.62953	-0.258004
89	-0.265895	-0.357264	0.368816	0.247912	-0.545621	0.46462	-0.968894	0.816024		0.567027	-0.634993	0.494146	0.375298	0.199309	0.17154	-1	0.962911	0.891359	0.240158	0.502817	0.897592	-0.962254	0.633153	0.987272	-0.991152	0.48802	-0.0956677	-0.121891	-0.953342	-0.984237	0.668806	-0.804597	0.162045	-0.851979	0.932406	-0.0688021	0.639201	0.283188	0.17873	0.49777	0.999805	0.994007	-0.00367983	-0.662162	-0.228965	0.1533	0.171464	0.340475	0.704669
90	-0.731055	0.99369	-0.0891953	0.302279	0.126788	-0.29889	0.879796	-0.835133		0.991733	-0.945425	-0.757969	0.78947	-0.988916	-0.718382	1	-0.865896	-0.873485	0.83508	-0.983234	0.800921	-0.942627	-0.170127	-0.968863	0.418668	0.219661	-0.0180193	-0.322531	0.549478	0.96264	0.893649	0.871221	-0.473385	0.955758	0.9981	-0.113583	-0.899376	-0.668965	-0.00209205	0.0750354	-0.786981	-0.0256014	-0.864114	-0.253661	-0.253736	0.379496	0.828644	-0.174633	-0.908224
91	0.209654	-0.519053	-0.847301	-0.850517	0.735931	0.393919	0.712567	-0.788875		-0.812491	0.941891	0.686916	0.854171	0.210374	-0.0156231	-1	0.997985	-0.910186	0.991312	-0.164399	0.915357	0.992149	-0.266857	0.964239	0.80748	0.340223	-0.130384	-0.863528	-0.939475	0.491449	0.999988	-0.958989	-0.991211	0.71643	0.977779	-0.0615453	-0.5902	-0.112828	0.358604	0.331486	0.997589	-0.944649	0.362393	0.8	-0.442973	0.568656	-0.385538	0.274196	0.744938
92	0.0545094	-0.0488608	0.913433	-0.353622	-0.142754	-0.0291846	-0.483796	0.592553		-0.00233644	0.0632633	0.951394	0.504675	-0.179046	-0.0462824		-0.702614	0.868674	0.546577	0.937074	0.878416	0.448668	-0.996624	-0.70568	-0.70055	0.493769	0.313624	0.769538	-0.375648	-0.481469	0.842869	0.952874	0.787333	-0.599268	0.577082	0.209109	-0.350793	0.660784	0.550518	-0.782966	0.219927	0.941459	0.653451	0.252012	0.217127	-0.124661	-0.271241	0.47341	0.749647
93	-0.902666	-0.482319	-0.243201	-0.22709	0.788208	-0.184289	-0.167722	0.783932		0.999152	-0.989143	0.983295	0.999566	-0.870296	0.415149		-0.915187	0.792696	0.914647	-0.999986	0.933346	0.614448	0.12614	-0.999704	0.961187	0.380323	-0.0490207	-0.799436	0.819409	0.601291	0.864917	0.170974	-0.857426	0.738352	0.950099	0.417094	-0.0745947	-0.590535	0.191315	-0.687034	0.989063	-0.905429	-0.389853	0.195567	0.317893	0.65019	-0.895994	0.966954	0.182193
94	0.971959	-0.465306	0.243535	-0.69348	-0.93696	0.632723	0.370013	-0.230376		-0.621038	-0.143108	0.19972	0.995163	-0.614732	0.228975		-0.719988	-0.58638	0.890489	0.500235	0.993406	0.524539	0.0919327	0.739773	-0.0218926	0.233969	0.00742784	0.275439	-0.971652	0.811916	0.646655	-0.986617	0.922532	-0.702808	0.924131	-0.83205	-0.18637	-0.456935	0.0268	0.329795	-0.428493	0.603589	0.454209	-0.00153846	-0.409815	0.103937	0.54334	0.992266	-0.0256326
95	-0.0626076	-0.349886	-0.575567	-0.218546	0.997863	-0.396726	0.290829	0.181733		0.117629	-0.0407824	-0.201404	0.455046	-0.551299	-0.500671		0.988524	0.694208	0.100547	-0.89649	0.765329	0.32816	-0.308902	-0.532303	0.43269	-0.472355	-0.122067	-0.383712	0.289576	0.926092	0.875189	0.972372	-0.788703	0.450681	0.793413	-0.968981	0.804002	-0.794245	-0.0720346	-0.50087	-0.255686	-0.0698067	-0.270709	0.172428	0.218964	0.650446	0.808686	0.126529	0.951584
96	0.489286	-0.808529	0.999867	-0.560994	-0.508034	0.944324	-0.585053	-0.772074		0.0853357	-0.879142	0.988254	0.905354	-0.324062	0.210305		-0.940567	0.997259	0.99471	-0.994194	0.556083	0.11174	0.943607	0.993112	-0.514496	-0.489821	0	-0.924431	-0.960654	-0.952155	0.931313	0.998398	0.940243	-0.697813	0.993852	0.821659	-0.644003	-0.859747	-0.182466	0.53656	0.954651	0.911607	0.326088	0.670273	0.825125	0.233173	0.841713	0.964486	0.965616
97	-0.330103	0.456805	-0.279642	0.999971	0.878565	-0.8	-0.937726	0.549828		0.899387	-0.721742	-0.69381	0.816124	-0.223039	0.877896		0.995795	-0.899913	0.999201	0.93446	0.954695	-0.991912	-0.107528	-0.997219	0.91145	-0.883326	0.972027	-0.912438	0.770373	0.880851	0.98157	-0.468681	0.94253	0.396671	0.0211008	0.354451	0.925407	-0.713912	0.175713	-0.258984	0.901782	0.355651	-0.116062	-0.873913	0.0090715	0.80987	0.416091	0.999904	-0.285952
98	0.0948091	-0.751825	0.994063	0.990747	-0.778098	-0.564269	0.793996	0.929514		-0.8631	-0.701099	0	0.170491	-0.220849	0.0746807	0	0.118958	0.979656	0.910774	-0.970727	0.193256	-0.605175	-0.539337	-0.291034	-0.67764	-0.946023	-0.506846	-0.0992877	-0.670969	-0.410706	0.884433	0.967034	-0.982481	0.642522	0.986952	-0.873718	-0.94318	-0.989861	-0.118779	0.904072	-0.98019	-0.654152	-0.196656	-0.531491	-0.460095	0.256946	0.343376	0.719815	-0.230628
99	0.571494	-0.0494326	0.113394	0.860031	-0.152498	0.933895	-0.725805	-0.544112		0.557655	-0.990642	-0.209656	-0.946706	-0.26636	-0.0600683	0	-0.868519	0.943156	0.996493	-0.692669	-0.168349	0.9994	-0.36431	-0.510681	0.456423	-0.953302	-0.0744199	-0.923339	0.221621	-0.646646	0.765964	0.104365	0.927692	-0.920047	0.879732	-0.996927	0.685894	-0.933857	0.371615	-0.975974	0.955927	0.984521	-0.486134	0.601374	-0.895626	-0.728327	0.396492	0.615657	0.635194
100	0.797219	-0.920041	0.146761	-0.0387191	-0.0249691	0.326465	0.84066	-0.0125677		0.841757	0.0575663	0.307471	0.853464	0.0861869	-0.0718777		0.897422	0.900975	0.845825	0.88507	0.279514	0.0936169	-0.778694	0.631361	-0.215105	-0.897064	0.985927	0.106279	0.973279	0.594907	0.879292	-0.79631	-0.834104	-0.0050062	0.103199	-0.0742927	-0.399834	-0.653675	-0.25226	-0.902916	-0.358756	-0.671176	-0.668965	0.26791	0.092073	0.561965	0.975787	0.92398	0.140853
101	0.694812	0.402287	-0.992278	0.71451	-0.700529	-0.460317	-0.944223	0.617534		0.307967	-0.510022	-0.458386	0.534767	-0.396972	0.990361	0.204879	-0.0924746	0.26963	0.999503	-0.740772	0.27876	-0.207859	-0.703292	0.261995	0.870884	-0.999394	-0.446186	-0.685253	-0.988492	0.980211	0.967827	0.978705	0.69327	0.0296166	0.898014	-0.400463	0.697107	-0.994093	-0.569289	-0.524097	0.781916	0.626461	-0.464007	0.0670449	-0.226808	-0.0528671	-0.464291	0.907812	0.871576
102	0.616973	-0.102504	0.254493	0.518824	-0.961151	-0.621043	0.890961	-0.621797		-0.143517	0.0497603	-0.295735	0.730894	-0.315438	-0.368943	0.531816	-0.703126	0.988272	0.894034	-0.760425	0.703481	0.818029	-0.380936	0.9978	-0.441446	-0.988305	0.398516	-0.785374	0.979867	-0.486702	0.989258	-0.882891	0.881547	0.587555	0.999984	0.914047	-0.447214	-0.999287	-0.810661	-0.99216	-0.751001	-0.0847146	0.547854	0.363624	0.998358	0.203134	0.29502	0.842213	-0.979877
103	0.285913	0.161249	0.598252	0.173469	-0.264521	0.602407	0.00166389	0.339839		0.2043	-0.953166	-0.196713	0.600407	-0.252459	0.536767	0.44551	-0.495366	-0.497162	0.998923	0.717864	0.999281	0.316228	-0.909406	-0.0206567	0.650731	-0.826094	0.641859	-0.171341	0.40107	0.598815	0.578287	0.950744	-0.28915	-0.308128	0.870978	-0.985699	-0.998308	-0.996128	-0.247429	-0.0446482	0.741495	0.993489	-0.164795	0.858268	-0.718857	-0.0563015	0.129496	0.844229	0.353318
104	0.551928	-0.824225	0.144799	0.334937	-0.769289	-0.387039	0.243974	-0.00242277		-0.23181	-0.485693	0.480654	0.889799	-0.708853	-0.548177	-0.637472	0.0797452	-0.660445	0.922575	-0.726282	0.447214	-0.233121	0.768424	-0.205112	0.779929	-0.999666	-0.496139	-0.368602	-0.422816	-0.127971	0.515907	-0.964155	-0.997023	-0.0297819	-0.104952	0.68373	0.0275696	-0.538212	-0.26677	-0.999977	-0.975912	-0.623117	-0.410365	0.0198779	-0.199361	0.962286	-0.979112	0.997288	0.255375
105	-0.0518781	-0.987932	-0.965482	0.483535	-0.435668	-0.158589	-0.108677	0.371929		-0.810712	-0.552736	0.718068	0.925104	-0.34384	0.50889	-0.482306	0.98419	-0.974536	0.804475	-0.833694	0.946743	0.781202	-0.972599	0.983927	-0.345705	-0.513482	0.054313	-0.63083	0.749598	-0.702967	0.825846	0.536875	0.986241	-0.968694	0.0208288	0.40021	0.628337	0.737585	-0.659036	-0.61582	0.413352	0.672673	0.720222	0.383939	0.921947	0.257856	-0.967439	0.997054	-0.288253
106	-0.884439	-0.752208	0.373526	-0.8	-0.151025	-0.420124	0.244421	-0.916415		0.853053	-0.746155	-0.831573	0.827144	-0.613257	0.268828		-0.958918	0.819835	0.447477	0.622856	0.991691	0.292772	-0.993067	-0.634251	0.824666	-0.868488	-0.015898	-0.636713	-0.238178	0.534936	0.414521	0.884965	0.925593	0.950114	0.674374	0.132714	-0.524964	-0.779759	-0.215489	0.085705	1	0.422465	-0.0793547	-0.11132	-0.477664	0.563499	-0.861229	0.363542	0.909733
107	-0.987787	-0.344927	-0.560848	0.502694	-0.755219	-0.581238	-0.296265	0.874578		-0.768884	-0.766554	0.109364	0.828221	-0.545692	-0.960111		0.993211	-0.908746	0.593269	-0.926905	-0.999536	0.981847	-0.621914	0.139914	-0.736328	-0.906252	-0.261936	-0.934414	-0.894623	0.759674	0.999935	-0.839542	-0.999194	-0.604439	0.820529	-0.987673	-0.567946	-0.786616	-0.565792	-0.997665	0.794571	-0.781833	0.636416	0.269254	-0.0556568	0.672673	-0.868159	0.994909	0.851046
108	0.833488	-0.626759	-0.847475	-0.13338	0.426525	0.666331	-0.594127	0.287031		-0.470046	-0.911839	0.927877	0.845068	0.191775	0.949782		-0.443916	-0.736168	0.887627	0.883887	0.824513	-0.904724	0.411152	-0.938299	0.42655	0.2557	0.428969	0.97308	-0.996675	-0.739894	0.977914	-0.99083	-0.999965	0.145794	0.999972	0.278929	-0.658254	-0.303265	-0.454834	-0.999985	-0.729777	0.42361	-0.726647	0.109726	-0.0222167	0.344817	-0.682424	-0.733986	0.00232018
109	-0.166775	0.460645	0.609026	0.768874	0.977136	-0.0206852	0.883032	0.243803		0.686485	-0.989716	-0.502934	0.644005	-0.27501	-0.664364		-0.982937	0.46332	0.99621	0.49158	0.884031	0.844403	-0.695152	0.952492	-0.366412	0.67054	-0.322785	0.60614	0.767529	-0.852438	-0.00169491	-0.578632	0.996913	-0.70205	0.999526	0.761333	0.903023	-0.985928	-0.358858	-0.213881	0.47631	-0.413345	-0.0261194	0.516537	0.42538	0.0389631	-0.462977	0.847953	-0.778413
110	0.462817	0.0377918	0.382184	0.672809	0.868415	0.491036	-0.897335	0.999813		0.306531	-0.887283	-0.326866	0.844127	-0.10594	0.0800102		-0.42322	0.92077	0.988886	-0.865715	0.410325	0.949039	-0.0144034	-0.122914	0.98652	0.81076	-0.21555	-0.868553	-0.591446	0.936516	0.829418	0.995653	-0.962145	0.27592	0.755128	-0.859698	0.999548	-0.67234	-0.790927	-0.385251	0.709437	-0.592259	0.922457	0.516907	-0.109993	-0.0257979	0.0199718	0.812132	0.624465
111	-0.3061	0.054061	-0.368496	0.545818	-0.547249	-0.0210398	0.690096	-0.398726	0	-0.116286	-0.149027	0.321926	0.892036	0.337983	0.231008		0.69761	-0.399284	0.634584	0.620124	-0.282673	-0.242305	0.455092	0.0340775	0.391773	0.531726	0.200814	0.200747	-0.287867	0.624256	0.148193	0.440358	0.813918	0.106852	0.323792	-0.163531	-0.658945	0.613616	-0.402055	-0.46564	-0.406351	0.275446	-0.139914	0.20972	0.999867	0	-0.849428	0.250777	-0.320673
112	-0.550252	-0.529179	0.787826	0.366938	0.352237	-0.39352	0.453951	0.823508	0	0.754211	-0.998274	0.197973	0.83031	-0.193484	0.0522844		-0.910261	0.651485	0.988922	-0.982277	0.686668	-0.225727	-0.155142	0.836637	-0.592102	0.604924	-0.694445	-0.217623	0.927673	-0.872895	0.249965	-0.700603	0.83651	-0.461541	0.394075	0.0695983	-0.970953	-0.996353	-0.232685	-0.468031	0.471046	0.175606	-0.494786	0.295569	0.315718	0.302672	-0.540966	0.651218	0.787039
113	-0.183486	0.308987	-0.915644	-0.674789	0.854679	0.120064	-0.988841	0.554336		-0.996439	-0.595366	-0.480273	0.882214	0.00348127	0.0242919		-0.982357	-0.939713	0.999814	-0.732793	0.793139	0.992786	-0.0138967	-0.621634	-0.970023	0.982623	-0.118352	-0.855994	0.836841	0.943105	0.992278	0.985249	-0.992303	0.84405	0.788405	-0.981393	0.887428	-0.885428	-0.574801	-0.977802	0.268734	-0.830602	-0.244722	0.74653	0.274295	-0.0658466	-0.626719	0.657505	-0.658505
114	0.0731175	-0.965401	-0.533081	0.700241	-0.969119	-0.193786	0.624191	-0.634301		-0.565565	-0.987669	-0.990268	0.850432	-0.0443173	-0.611116		-0.994901	-0.998158	0.993674	0.654734	0.743294	0.313182	-0.176783	-0.762573	0.637373	0.590648	0.0121203	-0.949722	-0.999758	-0.923154	0.216015	-0.922637	0.9484	0.563701	0.850639	0.981697	-0.944737	0.611105	-0.0277671	-0.383591	0.22714	0.91398	0.188531	0.239488	0.423424	0.916604	-0.630647	0.244667	0.389508
115	0.321685	0.977664	0.946315	0.238897	-0.0341265	0.22667	0.817806	0.304065		-0.746941	-0.739978	0.784532	0.938383	-0.0353477	0.0930205		0.878179	0.789352	0.831976	-0.674959	0.752164	0.808622	0.20839	0.99417	0.735035	0.987087	-0.910975	-0.692475	0.784912	0.996745	0.675412	-0.845248	-0.973884	0.230774	0.703784	-0.616637	0.249232	-0.970602	0.553506	-0.882331	-0.954919	0.437724	-0.208323	-0.228369	-0.398851	-0.165814	-0.613283	-0.33501	0.743038
116	-0.332102	-0.985398	-0.984548	0.457001	-0.666795	-0.895595	-0.699154	-0.861086		0.309345	-0.955028	0.122493	0.640341	-0.347706	-0.898822		-0.788316	-0.986133	0.908824	0.930066	0.896844	0.941195	-0.504731	-0.926217	-0.373083	0.954705	0.438522	-0.817178	0.968813	0.762653	0.0179183	0.882897	0.802032	-0.947863	0.961555	0.893684	-0.987433	-0.428793	-0.764372	-0.769352	-0.753378	-0.635257	0.0304887	-0.3241	0.5694	-0.314378	-0.39473	0.608025	-0.95517
117	-0.830807	0.19209	0.85692	0.688467	0.177442	0.176299	-0.655333	0.593522		0.318226	-0.707107	-0.537163	0.822591	-0.0861761	0.328942		0.904759	0.161508	0.850963	-0.631981	0.955008	0.735537	-0.946023	0.99921	-0.0999159	0.76139	-0.177904	-0.933795	-0.703914	-0.916139	0.98865	0.999952	-0.257336	0.289123	0.720166	-0.860927	-0.27731	0.131127	0.589942	-0.390332	0.651263	0.885697	0.466988	0.39685	-0.789871	0.225427	0.14495	0.873642	0.388495
118	-0.278093	-0.974678	-0.913038	0.905727	-0.220887	-0.178159	0.398526	-0.278177		-0.142327	-0.57689	0.398362	0.855829	0.402117	-0.0164169		-0.928607	-0.518079	0.186453	-0.765039	0.435191	-0.141263	-0.803001	-0.841536	0.755414	0.783557	0.226703	-0.327059	0.571946	0.281532	-0.13598	-0.873799	-0.570082	0.407059	0.829358	-0.482594	-0.25145	0.186348	-0.279958	-0.455631	-0.40126	-0.347981	-0.865296	-0.0911502	0.0944041	-0.23493	-0.596395	0.226229	0.0665804
119	-0.826927	-0.369226	0.988301	-0.228168	-0.542664	-0.442888	0.0439136	0.00917393		-0.260632	-0.993588	-0.323405	0.785847	0.374713	-0.0144077		0.787868	-0.562464	0.954288	0.548284	0.587113	0.137931	-0.466955	0.250509	-0.97855	0.744933	-0.782582	-0.37804	-0.528482	-0.659632	0.905114	0.589938	-0.351123	-0.598126	-0.997192	0.988799	-0.844387	-0.99928	0.421798	0.185148	0.140088	0.604386	0.999185	-0.241215	0.839369	0.316228	-0.124183	0.614109	-0.95342
120	0.0538509	-0.528136	-0.191256	0.560519	-0.0618966	0.399024	0.991585	0.816555		0.227747	-0.403712	-0.358565	0.998223	0.876257	-0.265675		-0.521075	0.893617	0.922288	-0.998202	0.796944	0.481079	-0.882627	0.556498	0.641491	0.939767	0.425629	-0.970657	0.560953	0.340344	0.845247	0.719781	0.621958	0.633668	0.781589	-0.195881	-0.699131	-0.532598	0.278653	-0.167123	0.377141	0.34444	-0.927564	0.189274	-0.286745	0.938929	-0.455296	0.95769	0.976784
121	-0.563337	-0.616227	-0.747409	-0.802342	0.486912	-0.953087	-0.941742	-0.431373		-0.917707	-0.869869	0.981906	0.81272	-0.259834	0.648831		-0.516737	0.881768	0.62867	0.997553	0.165052	0.443861	0.510889	-0.882066	-0.960952	0.88797	0.126788	-0.885795	-0.96129	0.998699	0.377652	-0.996639	-0.999988	0.156511	0.0360196	-0.501244	0.262051	0.27205	-0.0821952	-0.361694	-0.929188	0.999455	0.338919	-0.944757	0.00614428	-0.695574	-0.577797	-0.827217	-0.855934
122	-0.956264	-0.850221	0.846003	0.732202	0.339435	0.472221	0.649262	-0.133294		0.977151	-0.999124	0.891733	0.976233	-0.230407	-0.985875	0.127767	0.993085	-0.215728	0.979887	-0.992318	0.900922	0.935453	-0.984596	0.752294	0.880302	0.919123	0.0768398	-0.529999	0.117103	-0.455393	0.716726	-0.915533	0.941974	0.480084	0.894901	0.127971	-0.96422	0.976828	0.774779	0.557786	0.810407	-0.801966	0.286127	0.533718	-0.302799	0.623115	-0.151065	0.996942	0.249275
123	-0.692009	-0.544094	-0.601255	0.958916	0.828872	0.910954	0.830526	-0.165866		0.69521	-0.793191	0.378125	0.562979	-0.742449	0.514496	-0.127767	-0.103866	0.959308	0.799722	0.832241	0.202442	0.841489	-0.537608	-0.878581	0.268156	0.87582	-0.519706	0.886463	-0.954036	0.953033	0.907776	-0.995037	0.740606	-0.744049	0.999989	-0.938515	0.938269	0.540758	-0.745126	-0.878824	0.999508	-0.677984	0.406728	-0.722728	0.532993	0.0133458	0.823549	0.602537	0.998026
124	0.243055	-0.225167	0.0784611	-0.146975	-0.968539	-0.447214	-0.879563	0.664083		-0.814858	0.26039	0.0620272	0.718549	0.370179	-0.530229	0.172339	-0.493642	0.562525	0.558419	0.687149	0.597895	0.995309	-0.377059	0.878981	-0.417654	0.716954	-0.0319634	-0.999922	0.991228	-0.401254	0.716683	0.966315	0.995658	0.379919	0.990634	0.198468	-0.715491	-0.574317	0.0530023	0.172082	0.294086	0.00111235	0.522077	-0.124808	0.0506392	-0.370118	0.909576	0.414142	-0.31999
125	-0.292407	-0.913063	0.92018	0.361279	0.585324	-0.167164	0.942778	-0.161029		0.815455	-0.852417	0.718728	0.711449	-0.183806	0.981272	-0.172339	-0.999254	0.261683	0.958076	-0.39222	0.229133	-0.534798	-0.0981994	-0.334437	0.960493	0.485314	0.636251	-0.829698	-0.920941	0.441705	0.638974	0.907781	-0.999999	-0.0415226	0.179118	-0.175324	0.903591	-0.747125	0.869874	-0.0298909	-0.278578	0.0914822	0.593356	0.71154	0.928792	0.619484	0.300673	0.584829	-0.192201
126	0.0464854	0.888532	-0.866456	0.808921	0.637215	-0.636881	0.136564	-0.661031		-0.744205	-0.926369	-0.270862	-0.49998	0.934012	-0.844271	0.22486	0.977033	-0.450451	0.754287	-0.956524	0.680782	0.857842	0.162207	0.852059	0.473982	0.460681	-0.61691	-0.917283	-0.533993	0.770645	0.495418	-0.946384	-0.787606	0.870838	0.983939	-0.779487	0.228816	0.993151	0.162827	-0.999759	-0.0758528	-0.133255	-0.430513	-0.031453	-0.127886	-0.150383	0.968186	0.6458	0.707107
127	-0.127708	-0.665134	0.812324	0.999047	0.905597	0.765261	0.98397	0.90861		0.986733	-0.534498	0.997327	0.858273	-0.696602	0.982065	-0.28116	-0.829081	0.885378	0.962816	-0.609995	0.0323904	0.699131	0.286729	-0.984267	-0.028492	0.839043	0.723773	0.0191862	0.907446	-0.623703	0.945425	0.179195	0.853948	0.776317	0.897863	0.594701	-0.877614	0.795829	-0.1673	0.0318775	0.771167	0.437941	-0.328763	-0.881874	-0.400819	0.0577195	0.942082	0.296598	-0.773564
128	0.805056	-0.743065	-0.63962	0.888518	0.985946	-0.216083	-0.0625978	-0.190615		0.223553	-0.781987	0.996503	0.895703	0.777016	0.500503	-0.271284	0.559984	-0.265524	0.990485	0.59765	0.953621	0.957996	0.399686	-0.980179	0.969477	0.349053	-0.823129	-0.998596	-0.998086	0.487114	0.973444	0.00655008	0.648686	0.11219	0.987715	0.956075	0.305535	0.612173	0.850265	0.367915	-0.506927	-0.0516551	0.659927	0.310094	0.399639	0.403933	-0.0420844	-0.140584	0.707107
129	-0.529033	0.546035	0.52962	0.849189	0.0385035	-0.326651	0.331395	-0.146936		-0.980084	-0.903587	-0.654626	0.237745	0.144307	-0.317454	0.440551	-0.99985	-0.501764	0.586259	0.605206	0.543868	0.777941	-0.979747	0.987989	-0.62486	0.0695693	0.00772178	-0.743717	-0.51289	-0.0879839	0.180944	0.998556	0.66617	-0.896957	-0.170787	-0.764591	0.122096	0.261264	-0.979987	-0.122375	-0.698054	-0.633704	-0.235405	-0.798041	0.144556	-0.591932	-0.09421	0.47624	-0.231384
130	0.265156	-0.992594	-0.132652	0.887217	0.956324	0.656994	0.782406	-0.322948		0.971291	-0.677287	-0.0291846	0.692209	-0.19999	0.0765218	0.171354	0.883788	0.973142	-0.141605	-0.812585	0.21391	-0.290766	0.54307	-0.999235	0.999997	-0.277743	-0.610358	0.730557	-0.691	0.66389	0.0956852	-0.999964	-0.738672	0.321569	0.913466	-0.310101	-0.481616	0.985843	-0.0859682	0.175591	-0.744164	-0.993035	-0.343657	0.0382908	0.464783	-0.529999	-0.953018	0.950871	-0.343601
131	-0.877371	-0.33115	-0.939624	0.996631	0.427132	0.0282573	0.430398	0.747739		-0.935264	-0.403218	0.630593	0.486858	0.407718	0.0555762	-0.626034	-0.966515	0.968745	0.598226	-0.283975	0.716016	0.965963	0.574882	-0.464198	-0.424337	-0.208632	0.792187	-0.744049	0.888736	0.550117	0.999126	-0.519524	-0.999915	-0.822654	-0.0890754	0.841126	0.301131	-0.225626	-0.832884	-0.767282	0.833641	0.867498	0.199119	0.868919	0.607239	-0.055231	-0.296533	-0.928764	0.573231
132	0.0999339	-0.651748	0.0579669	0.816449	-0.0657155	-0.058722	-0.977802	0.999903		-0.834325	-0.804338	-0.186177	0.426274	-0.0808159	0.683291	0.203759	0.0271803	-0.761085	0.648359	0.749838	0.327841	-0.187112	-0.50807	-0.540009	-0.00954936	-0.243052	-0.0871347	-0.996324	0.217109	0.996341	0.83394	0.977119	0.152332	0.664364	0.980406	-0.883296	-0.44298	0.906892	-0.429998	0.900532	0.0925443	-0.988659	-0.987948	-0.62185	0.958875	-0.263716	-0.858374	-0.68127	0.326058
133	-0.829921	0.899924	-0.752802	0.962035	-0.00309596	-0.562665	0.609333	-0.937037		0.176342	-0.994657	-0.424316	-0.344701	0.496484	-0.729777	-0.718656	0.746156	-0.460494	0.150442	-0.980377	0.344453	-0.315843	0.948196	0.959258	-0.123645	-0.273779	-0.475856	0.962388	-0.998258	-0.974417	0.969722	-0.993763	0.903246	-0.924678	0.496221	-0.94762	-0.990005	-0.454885	-0.732177	-0.943056	-0.901083	-0.199256	-0.738641	0.667797	-0.0178543	-0.572945	-0.729293	0.0291591	-0.999751
134	-0.443298	0.240916	0.996601	0.918606	0.862932	0.0937035	0.977614	0.928764		0.331788	-0.985895	0.850798	0.573263	0.301691	-0.636565	-0.350033	-0.530452	0.990055	0.445658	0.939526	-0.447214	0.490367	-0.8754	-0.995123	0.556271	-0.466182	0.533315	-0.904463	-0.992883	0.913647	0.59432	0.958302	-0.992944	0.527058	0.920507	0.341595	-0.0685544	0.192503	-0.235427	-0.743751	-0.981746	0.714577	-0.125135	0.976731	0.224092	-0.440425	-0.648601	-0.770114	-0.41576
135	-0.674152	-0.744735	-0.4608	0.6751	-0.856143	-0.117847	0.959767	-0.938963		0.698952	-0.81119	0.514137	-0.675525	0.111555	0.401847	0.0193163	0.413068	-0.708371	0.389847	-0.240318	0.893319	0.601773	0.510846	0.999766	0.676842	-0.459082	-0.72113	-0.867538	-0.366471	-0.301499	0.269796	-0.377853	-0.979643	-0.315446	0.792131	-0.999918	0.0636292	-0.99777	-0.824529	0.751063	-0.0513085	-0.798982	0.835548	-0.0932626	0.279164	0.0870994	0.281014	-0.150671	-0.55133
136	-0.068562	-0.675297	0.550528	0.89311	0.796831	0.38163	-0.582688	0.637224		-0.827585	-0.490084	0.00790489	0.0989594	0.348756	-0.769562	0.914918	0.515695	0.998294	0.882499	-0.968971	-0.469155	-0.428681	0.457365	-0.926305	0.93716	-0.989324	0.984345	0.938876	0.981809	0.94665	0.58509	-0.994505	0.856862	-0.851057	0.955725	-0.683127	-0.996023	0.586373	-0.99751	-0.33736	0.340109	0.486142	-0.528748	0.0256326	0.412011	0.395177	0.210888	0.818627	0.658933
137	-0.958939	0.977001	0.333881	0.774154	0.56954	-0.0657258	0.855548	-0.47262		0.998246	-0.402123	0.95823	0.93963	-0.864826	0.270097	0.38964	0.999975	-0.291162	0.973397	0.904751	-0.638609	0.215997	-0.0793248	0.966074	-0.67919	-0.997578	0.295684	-0.973564	-0.942448	0.0425623	0.986667	0.993704	-0.064594	0.726451	0.983674	-0.918509	-0.815275	-0.904249	-0.571369	0.0209159	0.6	0.430055	-0.985622	0.296343	0.542232	-0.000857633	0.652153	0.802261	0.733935
138	0.659323	-0.95411	0.0883383	0.538058	-0.242317	-0.121714	0.945103	-0.27657		-0.981564	0.296739	-0.692637	0.078764	0.329031	-0.170343	0.523037	-0.880989	0.0794473	-0.405662	-0.657783	-0.817984	0.982604	0.101522	-0.878657	0.503742	-0.965411	-0.077961	-0.822791	-0.678236	-0.167139	0.547327	0.421938	-0.792383	0.596281	0.978494	-0.219566	0.757769	0.656179	-0.99262	-0.0174419	0.823863	-0.525533	0.116841	0.917205	-0.680672	-0.0745718	-0.510578	-0.841634	-0.958698
139	-0.884513	0.143139	-0.80343	0.994102	0.540758	0.922393	-0.720521	0.861229		0.90775	-0.997582	0.0982872	0.962561	0.449746	-0.481616	0.760475	0.999453	-0.930484	0.842157	-0.773199	-0.754248	-0.564058	-0.917227	-0.958975	-0.271573	-0.997444	0.717581	0.967684	0.979915	0.68194	0.998288	-0.794235	0.989415	-0.836998	0.666678	-0.997009	-0.762709	0.984233	-0.725385	0.322953	-0.905573	0.700231	0.302966	0.312676	0.985112	0.196939	-0.0531164	-0.625861	0.661031
140	0.529785	-0.162239	0.501825	0.999083	0.184851	-0.211073	0.485814	0.49591		-0.508918	-0.868519	-0.260073	-0.599554	0.0382234	0.333443	0.0465214	0.593199	0.164126	-0.051478	0.705446	0.321819	0.314658	0.526976	0.864931	0.156581	-0.728148	-0.726468	-0.932992	-0.649554	-0.217195	0.526053	0.0183893	0.821888	0.984685	0.520544	-0.02902	-0.660321	-0.607341	0.151609	0.153707	0.339685	-0.258847	-0.366456	0.189925	0.0675024	-0.0595273	-0.568175	0.411818	-0.181744
141	-0.57931	-0.778045	-0.15564	0.413754	0.152667	-0.159406	-0.174949	-0.056808	0	0.0628183	-0.598836	-0.0933407	0.34224	-0.0188815	-0.0363396	-0.136302	-0.350445	-0.253483	0.376292	0.774065	-0.283134	-0.299602	0.720259	-0.771029	0.285116	-0.978149	0.682378	-0.0929182	0.414074	0.0143262	0.25558	-0.362862	-0.949027	0.322254	0.842328	-0.222206	-0.0496795	0.00201748	-0.485288	-0.058406	-0.0756293	0.181004	0.995965	-0.020966	-0.0553423	-0.86251	-0.00197726	0.221572	0.698711
142	0.999967	-0.580204	-0.831526	0.965963	-0.998005	0.426564	0.993666	-0.902176	0	0.984689	-0.592875	-0.245224	0.627925	0.145559	-0.854257	0.343149	0.532755	-0.998646	-0.159744	-0.982781	0.015768	0.199464	0.303428	0.576879	-0.320678	-0.995136	-0.353452	-0.490261	0.856291	0.404623	0.393802	0.583579	0.999054	-0.975178	0.766063	-0.854691	-0.448413	0.166824	-0.757376	0.758036	-0.27861	0.172316	-0.889853	-0.285689	0.0558678	0.0152946	-0.945946	-0.902372	-0.989327
143	0.19439	-0.952402	0.0692776	0.500954	0.941158	-0.553538	0.952706	0.818966		0.937361	-0.711422	-0.159232	-0.222721	0.530478	-0.110432	0.60293	-0.759118	0.929851	0.607648	0.388701	-0.69978	-0.599091	-0.0237055	-0.540404	0.183593	-0.936233	0.181829	0.132493	0	0.0969101	0.916668	0.966235	-0.980056	0.832933	0.778441	0.636234	0.803226	0.280931	-0.0142166	-0.998913	0.637595	0.787252	0.154377	0.993654	-0.840255	-0.384296	0.376753	-0.951734	0.806046
144	-0.181162	0.974994	-0.24751	0.264187	0.990044	-0.316228	-0.871248	-0.381863		-0.710981	-0.769279	-0.593554	-0.922441	0.635105	0.570495	-0.961782	-0.892231	-0.957054	0.196288	-0.598239	-0.999448	0.999683	0.693401	-0.859033	0.346562	-0.953254	-0.166195	-0.989327	-0.375038	-0.763338	0.758439	0.461934	0.929143	0.570584	0.84224	-0.999719	-0.990306	-0.790115	-0.855265	0.470053	-0.999044	0.820127	-0.16089	0.256863	0.917891	-0.985222	-0.682372	0.738224	-0.999983
145	-0.310693	-0.496535	0.864044	0.809743	0.0540222	0.265221	-0.971353	-0.111727		0.253359	0.817606	-0.668836	-0.271339	0.292219	-0.117181	0.634669	0.973055	0.611105	0.352609	-0.983427	-0.192141	-0.215456	0.99971	0.578263	-0.192362	-0.971629	-0.00614995	-0.995363	-0.91364	0.963934	0.739301	-0.936535	-0.996457	-0.809759	0.99403	-0.717279	-0.881181	0.556227	-0.840209	-0.95245	-0.978305	0.478041	0.635365	0.99083	-0.984648	-0.0909915	0.0422671	-0.879971	0.988122
146	0.18146	-0.652659	-0.797638	0.520934	-0.0384859	0.102235	0.965002	0.395892		-0.999836	-0.855489	0.931356	-0.952145	0.261009	-0.665725	0.752115	0.9814	0.179849	0.834873	0.923352	-0.999765	0.65424	0.0687792	-0.355282	0.906106	-0.983965	0.999435	0.513717	0.920998	0.0384126	0.928041	0.898144	0.963117	0.450525	0.954798	-0.393919	-0.987623	-0.929034	-0.787333	0.62537	-0.477919	-0.698706	-0.800311	0.85864	-0.587087	0.375537	-0.400768	-0.979345	-0.985221
147	0.269935	0.158134	0.51175	0.376413	-0.655687	-0.852171	0.0361399	-0.507536	0	0.870441	-0.810922	0.0938764	-0.429692	-0.574208	0.510238	-0.763736	-0.940795	0.51114	0.427692	-0.861462	-0.700341	-0.782601	0.320481	-0.912116	-0.426706	-0.778905	-0.912839	-0.913015	0.999975	-0.799861	0.376771	0.610848	-0.848387	0.83186	0.994901	-0.576157	-0.233046	0.767859	-0.887184	0.263244	0.462607	0.640887	0.568489	0.175473	0.667154	-0.889678	0.404447	0.878143	0.273654
148	0.955844	0.874682	-0.452436	0.881503	0.618689	0.25883	0.964663	0.877557	0	0.913812	-0.687586	-0.974829	-0.430318	0.464313	-0.469199	0.346077	-0.433626	-0.100538	0.601172	-0.995785	-0.608806	-0.347981	0.549941	0.945623	0.996742	-0.803492	0.520482	-0.765288	-0.999738	-0.141204	0.851742	-0.62727	0.825307	-0.683719	0.421972	-0.845728	-0.614374	-0.289515	-0.49573	-0.919409	0.907919	0.145176	0.586269	0.00839131	0.267316	0.18723	0.600606	-0.949902	-0.432731
149	-0.0981477	-0.907504	-0.610654	0.811176	-0.531795	-0.0733314	0.948485	-0.936652		-0.994476	-0.847998	0.930811	-0.517726	-0.660312	0.377837	0.993285	0.767486	-0.532567	0.744745	0.99908	-0.981759	0.12907	0.636213	-0.998586	-0.84847	-0.703843	0.0246838	-0.655545	0.998127	0.172949	0.0821187	0.712443	-0.999111	0.606333	0.946588	0.475705	0.316833	0.849875	-0.261296	0.487691	0.273469	0.312022	0.258509	0.891453	0.0848431	-0.264136	-0.620604	-0.496679	-0.459098
150	0.097972	-0.629984	0.867673	0.944477	-0.874157	0.00722873	-0.303636	-0.993367		0.156249	-0.0620047	-0.888861	-0.995942	-0.00182815	-0.78206	-0.763886	-0.919064	-0.0203446	-0.386009	-0.230079	-0.749372	0.115564	0.372503	0.996948	-0.266984	-0.536205	-0.473505	-0.0736251	0.971227	0.353863	0.83205	0.95271	0.897154	-0.817327	-0.437747	-0.975916	-0.988275	-0.499041	-0.395962	-0.598898	-0.498015	-0.997753	-0.14394	-0.23299	-0.377064	-0.901472	-0.643969	-0.303022	-0.458748
151	-0.835417	-0.982378	-0.850575	0.672111	0.762316	-0.192437	0.813155	-0.148687		-0.584747	-0.340328	0.636479	-0.673073	-0.0945612	0.645068	-0.70256	-0.0523756	0.756399	0.929169	-0.992267	-0.356651	0.735667	0.526986	-0.387232	0.418643	-0.77047	0.130505	-0.854677	-0.997661	0.667722	-0.826092	-0.958886	0.994675	0.953801	0.904764	-0.300506	0.11555	-0.535308	-0.138424	-0.145639	0.875421	-0.496359	-0.99465	-0.227394	0.532702	-0.29296	-0.869128	-0.759131	-0.514496
152	0.602657	0.769758	0.680126	0.725953	-0.306689	0.287348	0.983554	0.402633		0.920676	-0.977637	0.855247	-0.933879	-0.158589	-0.668965	0.91542	-0.0462112	0.899714	0.862698	0.998835	-0.314737	-0.105983	0.0424454	0.995591	-0.847998	-0.733608	-0.327961	-0.296399	-0.692532	-0.975601	0.816638	0.937351	-0.96949	0.749594	0.904692	0.887659	-0.147871	0.795373	-0.546053	-0.999849	-0.999697	0.972254	-0.519234	0.905569	-0.300489	0.0666829	-0.859401	-0.616395	-0.591129
153	0.699536	-0.998553	-0.0438175	0.819641	0.860024	-0.191647	-0.973494	-0.356319		-0.923742	-0.259502	-0.00707529	-0.910874	0.145086	0.650146	0.999998	-0.0740015	-0.990865	0.996857	-0.995018	0.557964	-0.606104	0.386186	-0.672448	0.740443	-0.481034	0.418402	-0.998704	0.966585	0.830842	0.690147	-0.883703	-0.563589	0.587216	0.742163	-0.805542	-0.604132	0.99146	-0.185666	0.813352	0.685365	-0.641049	0.376579	-0.328597	0.881381	-0.233435	-0.392849	0.928141	-0.773805
154	-0.400819	-0.385739	0.23893	0.558015	-0.930803	0.551641	0.991666	0.574533		0.683941	-0.604215	-0.60497	-0.933002	0.113148	-0.894427	-0.700964	0.812898	0.245576	0.340492	0.904912	-0.882285	0.93719	0.632083	-0.933727	0.0639713	-0.754266	-0.0876918	-0.998605	-0.999859	-0.840615	0.729261	0.985925	0.512389	-0.95401	0.800793	0.0797452	-0.0832481	0.837192	-0.501615	-0.975005	0.589051	0.459039	-0.364786	0.821731	0.0171078	-0.969428	-0.9141	-0.938808	-0.0555677
155	0.480535	0.432314	-0.0813088	0.656223	-0.929903	0.742928	0.566472	-0.665856		-0.129735	0.828787	0.373039	-0.997844	-0.247383	-0.742734	0.737562	-0.799669	-0.0290397	0.443561	0.0208544	-0.999639	-0.837548	0.293537	0.973288	0.277384	-0.832193	-0.21693	-0.857247	-0.377625	0.994723	0.698768	-0.870563	-0.743456	0.767664	0.853056	-0.70061	-0.119403	0.986538	-0.344817	0.102644	-0.99006	-0.795143	0.542742	0.96	-0.862795	0.996648	-0.488716	0.814955	-0.176033
156	0.481919	-0.714288	-0.999101	0.779826	-0.922515	-0.468889	-0.930532	0.181897		0.905395	0.0221076	-0.510089	-0.979808	0.650341	0.300602	-0.922905	0.213887	-0.622372	0.958258	0.619361	-0.254843	-0.226808	0.559566	-0.99918	0.673841	-0.9005	0.860496	0.226067	0.153034	-0.480246	0.792061	0.999789	0.942166	0.875862	-0.012499	-0.804083	-0.990983	-0.164792	-0.254133	-0.351417	0.664364	0.993068	-0.996204	-0.820063	0.571734	-0.926495	-0.911711	-0.166559	0.912818
157	-0.00235293	0.558448	0.574926	-0.644009	-0.750552	0.115953	0.494883	-0.214233		-0.702964	-0.483784	-0.383208	-0.852902	0.0288563	0.0315324	0.613067	-0.728186	-0.31251	0.447214	-0.859206	-0.55849	0.76531	0.361243	0.794636	0.172753	-0.982868	-0.996229	-0.720934	-0.209035	-0.314314	0.231186	-0.883939	-0.749339	-0.452136	0.885785	0.324395	-0.119263	-0.359306	-0.28946	-0.0731151	0.563638	-0.35134	0.474749	0.27987	-0.111109	-0.121797	0.321698	-0.527167	0.204128
158	-0.33501	-0.739572	-0.562051	-0.173003	-0.98052	0.195437	0.600998	0.705573		0.359284	-0.213477	0.161858	-0.876146	0.117567	-0.455813	-0.67903	-0.944001	0.473397	0.997976	-0.925169	-0.760552	0.654152	0.946632	-0.478008	-0.714166	-0.739663	0.015502	-0.550826	0.5747	0.909607	0.86332	-0.467375	0.612572	0.550416	-0.242912	-0.143845	-0.509172	0.927991	-0.565304	-0.0509143	0.618676	0.956227	-0.391628	0.124354	0.262369	-0.270542	0.0185891	0.0649901	-0.826659
159	0.896925	-0.136418	-0.198098	0.643331	-0.90493	-0.596324	0.564684	-0.566938		-0.999938	-0.986736	0.331906	-0.806136	-0.988198	-0.0836637	-0.999098	-0.320991	-0.890587	0.460016	-0.999998	-0.0808859	0.815507	0.718847	-0.970247	-0.97425	-0.999211	0.697056	-0.996514	-0.241003	-0.819892	0.754032	-0.479309	-0.77728	-0.854749	0.773083	-0.615052	-0.8	-0.79647	-0.518302	-0.864645	0.0905357	-0.44527	-0.0895628	-0.0091142	-0.219236	-0.568932	-0.151299	-0.372824	-0.999819
160	0.614434	-0.111119	-0.103399	0.414437	0.00568819	-0.133958	0.951709	0.426069		-0.778891	-0.298755	-0.100332	-0.998909	-0.606517	0.400936	0.990803	0.206191	-0.28627	0.998593	-0.935262	-0.997876	-0.855198	0.459953	0.99452	0.199548	-0.993658	-0.501362	-0.775042	-0.743253	0.777355	0.184034	0.374725	0.682791	0.512669	0.691862	-0.313461	-0.994217	-0.996831	-0.0933832	-0.855422	-0.878702	-0.0566254	-0.103358	0.451458	0.315621	0.606449	0.0674527	0.363208	0.968994
161	-0.00763337	-0.600182	0.257184	0.0575621	-0.767726	0.196971	0.413075	0.0317648	0	0.0708495	-0.515219	-0.231434	-0.572054	-0.188449	-0.331486	-0.0205336	-0.241856	-0.179886	-0.145462	0.771313	-0.760485	-0.0421312	0.288001	0.640149	0.338902	-0.971933	0.0395925	-0.0501042	-0.0861572	0.471044	-0.0732068	0.0479844	0.267146	-0.128865	-0.448855	0.0533151	-0.107624	0.337242	-0.14337	-0.0666167	-0.226089	-0.121273	-0.451578	0.00797423	0.722461	0.00897272	-0.527	0.0764247	-0.281385
162	0.26446	0.175428	-0.0875485	0.25025	0.984283	0.0352345	0.0223976	-0.0945913	0	-0.970475	-0.00110988	0.407858	-0.934875	0.258429	0.507074	-0.427255	0.162516	0.332878	0.164004	-0.58015	-0.439067	0.415653	0.392197	-0.564495	-0.484639	-0.892356	0.18637	-0.727292	0.406658	-0.858534	0.314152	0.356122	-0.568608	0.612085	0.693454	0.469087	-0.645527	0.537487	-0.891932	-0.00339365	0.293953	0.280996	0.0480114	0.0822123	-0.568347	-0.968716	-0.24053	-0.983929	-0.099184
163	0.362392	-0.504188	0.839097	0.819978	-0.11958	0.112773	-0.996602	0.871683		0.023662	-0.91275	-0.266944	-0.583878	-0.966933	0.455476	0.928792	-0.412381	-0.924729	-0.907391	0.744835	-0.876639	0.502041	0.524097	-0.991512	0.977078	-0.820644	-0.261328	0.727338	-0.395829	-0.427178	0.234316	-0.999221	-0.991228	0.451331	0.875211	-0.856561	-0.987571	-0.62179	-0.163415	-0.96515	0.0933874	-0.228743	0.356943	0.252688	0.934551	0.169227	0.202092	0.261447	-0.553219
164	0.556619	-0.384137	-0.145132	-0.0717427	-0.622036	-0.110432	-0.67943	-0.660606		0.928131	0.325278	-0.293125	0.016609	-0.577646	0.113665	0.0397413	0.170624	-0.175526	-0.0120163	-0.149843	-0.823046	-0.800701	0.711768	0.949844	0.175631	-0.852804	0.401644	-0.957944	-0.824259	0.879835	0.726527	-0.716676	-0.998989	-0.183845	0.613431	0.33282	-0.894427	-0.1278	-0.90847	0.998071	-0.986789	0.723418	0.981997	0.919295	-0.395111	-0.891179	0.732625	0.232295	0.0192934
165	0.129776	-0.259492	0.153316	0.826176	0.0443481	0.233775	0.990163	0.513308		0.838859	-0.996384	0.748207	-0.633238	0.436598	-0.742473	0.135947	-0.0603353	0.997806	-0.975111	0.169457	-0.97923	0.0877202	0.803608	0.97346	-0.995573	-0.998517	-0.939169	-0.967921	0.979177	-0.191188	0.0136973	0.994473	0.425961	0.8712	0.844187	-0.101976	-0.997793	0.877788	-0.951561	0.950217	0.96531	-0.150798	-0.951357	0.0449666	-0.507246	0.414952	0.802781	-0.90911	0.663549
166	0.783856	-0.888426	0.0184828	-0.972749	-0.441232	0.0242647	-0.788199	0.65597		-0.630124	-0.915359	0.615427	-0.537677	-0.647539	-0.344327	-0.342382	-0.37023	0.80092	-0.924678	0.810638	-0.872814	0.921415	0.799783	-0.997412	0.844619	-0.930421	0.33669	-0.611859	-0.965548	0.727144	0.912659	0.888658	0.995847	-0.994663	-0.299582	0.147296	-0.344334	0.793736	-0.724745	-0.648947	0.555643	-0.978627	-0.833419	-0.355292	0.118168	-0.40407	0.644787	0.874768	-0.96819
167	0.983492	-0.455279	-0.999991	-0.138918	-0.995117	-0.743294	0.532848	0.611748		-0.998812	-0.999711	-1	-0.79505	0.845115	0.593674	-0.589469	-0.558853	-0.653168	-0.77931	-0.873409	-0.997959	-0.890734	0.809411	-0.813504	-0.181162	-0.981151	-0.974555	-0.358192	-0.996171	-0.607922	0.991017	-0.998951	0.944119	0.96268	-0.404243	-0.0725357	-0.974057	-0.356637	-0.900297	-0.697254	-0.600522	0.407169	0.417112	-0.259601	0.355663	-0.163318	0.9889	-0.0412223	0.34981
168	-0.122264	0.989366	0.272567	0.0468967	0.868147	-0.02374	0.967059	0.0304665		0.798004	0.0282906	0.151183	-0.729869	0.273446	-0.678742	0.850048	0.776076	0.867934	0.532813	-0.957817	-0.983012	0.936688	0.674909	-0.39104	0.022995	0.996402	0.125488	-0.999999	0.76165	0.888818	0.617301	0.838024	-0.897385	-0.413714	0.830628	-0.0141417	0.506846	0.994086	-0.699124	-0.153455	0.92035	-0.375998	0.704361	0.856372	0.0440748	-0.23678	0.682415	0.517521	-0.278219
169	0.767282	-0.771223	0.70561	0.946452	0.364859	0.670718	0.79924	-0.285276		-0.991154	-0.84189	-0.0795022	-0.859816	0.96793	0.0387836	0.60745	-0.795969	-0.936956	0.513369	0.742335	-0.973928	0.901232	0.564341	0.964485	-0.467167	0.825896	0.822952	-0.986394	-0.890732	-0.965566	-0.222746	0.978234	0.993142	0.523127	-0.418573	-0.996163	-0.0886464	-0.959055	-0.484061	-0.38978	-0.590141	0.446587	-0.415318	0.709411	0.221708	0.140051	0.334758	-0.905042	0.677437
170	0.401612	-0.336336	-0.286811	-0.343994	-0.269722	-0.103469	-0.5807	-0.0152654	0	0.164689	0.0616801	0.139568	-0.682863	-0.0306561	0.481813	-0.45067	-0.631025	0.853135	0.213974	0.0427913	-0.216854	-0.435768	0.94511	-0.818178	0.249658	0.10433	-0.572763	0.970734	0.914139	-0.219558	0.434553	-0.988142	0.990866	-0.606336	-0.778568	-0.0978734	-0.770063	0.978094	-0.999834	-0.563648	-0.515275	0.360338	0.351626	0.812942	-0.418158	-0.477216	0.99754	0.966635	-0.990327
171	0.931023	-0.601617	-0.229385	0.143965	0.23509	0.0437409	-0.970397	-0.2009	0	0.892017	-0.485101	-0.334452	-0.59848	0.994686	-0.294333	0.958712	1	-0.916506	0.284392	0.939151	-0.875883	-0.455386	0.983164	0.426682	0.00513472	-0.0327987	-0.189329	-0.886001	-0.869223	0.977839	0.0467371	0.93955	-0.957036	0.870953	-0.213903	-0.203717	-0.82803	-0.863357	-0.994919	0.483465	0.659626	0.411492	-0.767322	-0.316228	0.263117	-0.204147	0.30131	0.750015	0.948683
172	0.392804	-0.811111	0.998586	-0.250662	0.379507	-0.0466279	0.821231	-0.334545		0.0312569	-0.495881	0.85882	-0.764807	0.476226	-0.234017	0.78729	-0.287948	-0.567709	0.347264	0.536073	-0.651933	0.551121	0.828849	0.994767	0.42862	0.78753	0.10089	0.695408	0.280939	-0.675412	0.077246	-0.887693	-0.30232	-0.966531	0.477148	0.178499	0.514496	0.427674	-0.999879	-0.491321	0.694832	-0.107157	-0.0254547	0.569678	-0.161921	-0.96789	0.762444	0.324007	0.606789
173	-0.233256	-0.179553	-0.0806047	0.407821	-0.741603	0.694292	0.894088	0.444829		-0.316654	-0.970332	0.254829	-0.694151	0.983413	0.629061	-0.999498	0.61755	0.934376	0.45056	-0.918863	-0.800781	-0.721278	0.89313	-0.914877	0.384367	0.32178	0.191392	-0.684113	1	0.943421	0.330693	0.819232	-0.967459	0.88141	0.815353	0.0700615	-0.647709	0.634808	-0.833997	-0.880893	-0.611313	-0.970684	0.576381	0.395244	0.460192	-0.707687	0.917355	-0.722193	-0.998843
174	0.998671	-0.200747	-0.318048	0.449464	-0.282832	-0.403766	0.637914	0.914424		0.172001	-0.214827	-0.834677	-0.687491	0.382507	-0.776114	0.0142843	-0.473669	-0.487128	0.894629	0.804259	-0.0187812	0.976853	0.282237	0.969859	-0.15904	0.774441	-0.856823	-0.880471	0.984086	-0.363983	-0.663308	-0.9882	0.999817	-0.00436677	0.992734	-0.651592	-0.541682	-0.848161	-0.614232	0.582277	-0.347225	-0.682356	0.46099	0.25723	0.862857	-0.162829	0.929392	-0.385173	0.999154
175	-0.965755	-0.24328	0.912632	-0.577296	0.997433	0.600757	-0.99845	-0.0242585		-0.942334	-0.74767	0.959215	-0.725708	-0.163891	0.838258	-0.985821	-0.978745	-0.911256	0.822708	0.946485	-0.515011	-0.674941	0.910546	0.944729	-0.720869	0.263143	0.412137	-0.25743	-0.982698	-0.929065	-0.565631	0.972754	0.793815	0.987481	-0.221008	-0.836338	-0.978617	0.178139	-0.658505	-0.99428	-0.0161269	-0.646021	0.466623	-0.716767	-0.642513	-0.973763	0.650151	0.991176	-0.865133
176	0.830184	-0.736577	-0.6341	0.560235	0.635581	-0.405702	0.822487	-0.0678843		0.99942	0.0972566	0.111821	-0.273563	0.336735	0.0119039	0.271705	-0.0682769	-0.130091	0.913547	-0.999895	-0.185315	-0.506777	0.359939	0.0539622	0.162829	0.61711	0.228385	-0.599844	-0.32662	0.994437	0.112701	-0.95647	-0.688166	-0.482872	0.761056	0.284069	-0.325708	0.65371	-0.178531	0.273167	0.28192	0.223396	0.158301	0.404891	0.0880958	0.0347952	0.931522	-0.705876	0.558249
177	-0.1023	0.444577	0.42699	0.832263	0.472474	0.429934	-0.358979	-0.774757		-0.962967	-0.631818	-0.801685	-0.824169	-0.573535	0.583187	0.14674	0.989107	-0.26963	0.0445772	-0.718836	0.0730527	-0.948241	0.0632534	0.975068	-0.153638	0.996035	-0.858947	0.651226	-0.792226	-0.999849	0.470922	-0.8843	-0.978539	-0.503219	-0.353057	0.31197	0.252422	0.260175	-0.667341	-0.962371	-0.88972	0.58014	-0.616978	0.163204	-0.823412	-0.850436	0.474396	0.593271	-0.863639
178	0.24018	-0.308368	-0.979877	-0.399502	-0.873794	-0.200396	-0.999994	-0.962691		-0.697747	0.675975	-0.495799	-0.747671	0.993267	-0.982893	0.764139	-0.599798	0.968127	-0.586495	-0.966235	0.999979	0.781147	0.591292	-0.970574	0.941527	0.889402	0.749151	-0.953867	-0.908091	0.949938	-0.463335	-0.991317	0.966727	-0.706613	-0.362446	-0.842551	-0.981969	-0.411779	-0.939793	-0.951213	0.973417	-0.273951	0.376955	-0.53776	0.684586	-0.995126	0.485121	0.521704	0.606043
179	0.418538	0.570043	0.999746	-0.679134	0.981544	0.278416	0.9848	0.726217		0.900737	-0.996954	0.4656	-0.561207	0.692809	-0.215302	0.319267	0.892769	0.972858	-0.772122	0.980797	0.972892	0.976439	0.977038	0.964084	-0.77884	0.997848	-0.972914	0.99871	0.98667	0.446508	0.259798	0.989503	-0.996808	0.66936	-0.54136	-0.52233	0.879188	-0.642851	-0.668144	-0.727829	-0.467512	-0.540088	-0.545524	0.994887	0.233485	-0.322361	0.784528	0.234217	-0.896116
180	0.985078	-0.193286	-0.998205	0.572515	0.242045	-0.889411	0.252546	-0.066519	0	-0.953156	0.290857	-0.324955	-0.485554	-0.969564	-0.124323	0.615012	0.425797	-0.988959	-0.440417	-0.735598	0.122643	-0.987664	-0.0421763	-0.979082	0.606395	0.999725	0.569603	-0.934433	-0.608005	0.776725	-0.861072	-0.874612	-0.96875	-0.935994	-0.74189	-0.82062	-0.997308	0.0451799	-0.0499376	-0.931137	0.153402	0.104685	-0.0193163	-0.132164	-0.97573	-0.985549	0.332377	-0.863229	-0.959951
181	-0.160272	-0.433724	0.962187	0.758694	-0.294853	0.999814	0.964881	-0.461023		0.997854	0.533443	-0.154912	-0.503313	-0.784088	-0.00550956	0.334249	-0.53463	0.992894	-0.997186	0.909999	0.172014	0.946251	0.272003	0.963887	-0.0225637	0.842219	-0.305449	0.982084	-0.968635	-0.999752	0.971332	0.789422	0.937705	0.997734	0.999755	-0.323144	-0.587159	-0.898611	-0.672605	-0.972742	-0.62927	0.45973	-0.130512	0.447214	0.755728	-0.765311	0.900962	-0.165566	0.295379
182	0.0398922	0.0187008	-0.67333	0.33099	0.643317	-0.710215	-0.227184	0.439843		-0.868928	0.176912	0.233043	-0.264066	-0.340563	0.308161	0.90068	-0.615481	-0.329961	-0.896445	-0.903224	0.317808	-0.965021	0.446493	-0.342035	0.599184	0.649184	0.287214	-0.991257	0.999474	0.988544	-0.542057	0.0639713	-0.964697	0.712632	-0.961899	0.066889	-0.360134	-0.945715	-0.202897	-0.704822	0.712111	-0.238868	-0.155598	-0.797574	-0.995115	-0.224317	0.808312	0.627618	-0.630803
183	0.434018	-0.999831	0.153609	0.639607	-0.186197	0.551388	0.097907	-0.45237	0	-0.684968	-0.9935	-0.241576	-0.21749	-0.381634	-0.278041	0.358787	-0.132656	0.0791325	-0.963504	-0.735043	0.823365	-0.243852	0.980014	0.0767995	-0.0442255	0.990962	-0.815124	0.694663	-0.99929	0.640448	-0.0979014	-0.507282	-0.836199	-0.349421	-0.174389	-0.0718924	-0.0550072	-0.104477	-0.343747	0.0984799	-0.459603	-0.781115	0.372259	0.139723	0.186627	0.0221788	0.742338	-0.120721	0.476669
184	0.400658	0.712557	-0.374381	0.0373021	-0.271923	-0.998453	-0.51042	0.522956		0.414131	-0.990821	-0.168964	-0.506842	-0.995839	0.685281	0.59239	0.506361	0.063399	-0.613547	0.972558	0.850798	0.892438	-0.493606	-0.995554	-0.643473	0.985798	-0.214407	-0.813305	-0.977582	0.344788	0.45383	-0.851108	-0.957054	0.90565	-0.749838	-0.929807	-0.98821	-0.468526	-0.999469	-0.823318	0.994251	0.323507	-0.690595	-0.501978	0.864223	-0.939418	0.998119	0.578669	-0.608525
185	-0.685475	-0.871807	-0.504217	0.223569	0.987489	0.440977	0.994656	-0.521186		-0.776008	0.202361	-0.139828	-0.740699	-0.796134	-0.416124	0.019971	-0.328036	0.990225	-0.932489	0.939495	0.834363	-0.913812	0.591265	0.997209	0.813155	0.985242	-0.120425	-0.98468	-0.798905	-0.360295	0.240143	0.993938	0.876187	-0.98349	-0.724558	-0.930222	-0.795553	-0.27045	-0.63251	-0.272463	0.448516	-0.644472	0.317083	-0.911705	0.454964	-0.435655	0.791981	-0.710328	0.758354
186	0.985112	-0.268242	0.712707	0.348799	0.860823	-0.801933	-0.97415	0.530628		0.908222	-0.943404	0.505856	-0.633665	-0.243594	-0.223268	0.983823	-0.930059	-0.999926	-0.331013	-0.691554	-0.377121	0.983771	0.212309	-0.918771	-0.268799	0.984051	0.157476	-0.863433	0.844918	-0.3522	0.634101	-0.99054	-0.963543	-0.72849	-0.794079	-0.411618	0.198091	-0.252422	-0.949535	-0.79631	0.348131	-0.663814	0.830836	0.791123	-0.273846	0.594353	0.707482	0.773753	-0.585662
187	-0.359397	0.179261	-0.164399	0.835604	0.951194	0.853874	-0.0530704	0.811477		-0.983453	0.497311	0.887496	0.00116009	-0.664022	-0.0371767	0.966135	-0.26387	0.999441	-0.185983	-0.728483	-0.637413	-0.794713	-0.277741	0.963909	-0.7568	0.995857	-0.113567	-0.575663	0.936797	-0.4711	0.996787	-0.946514	0.99715	0.00436042	-0.417813	-0.607239	-0.675273	-0.736328	-0.462409	-0.619899	0.0519177	0.952293	-0.333326	-0.939325	0.0307412	-0.946833	0.636942	0.983099	-0.349922
188	0.998019	-0.33245	-0.622544	-0.306602	-0.361207	-0.952255	-0.985981	-0.561501	0	0.824285	-0.926973	-0.993932	-0.994548	-0.254832	-0.930751	-0.785067	-0.603222	-0.999754	0.974732	0.996926	0.386058	-0.214057	0.967938	0.935764	0.129711	0.997856	-0.153126	0.998044	-0.781571	0.837546	1	0.618118	0.406484	0.968031	-0.942319	0.199796	-0.676465	-0.627962	-0.293473	-0.981834	-0.665157	0.235649	0.595818	0.16481	0.195732	-0.352756	0.300142	0.0119557	-0.150198
189	0.944214	-0.397071	0.757063	-0.190615	0.651526	0.903278	0.929986	-0.613124	0	-0.671029	0.915042	0.155963	-0.151887	-0.319673	-0.700669	0.992562	0.446647	0.717478	-0.228048	-0.944281	0.63	0.984345	0.96577	-0.999999	0.999914	0.887624	-0.705534	0.406287	0.890069	-0.997308	0.939045	-0.693291	-0.792794	-0.956674	0.510125	-0.987469	0.511016	0.873272	0.522334	0.014387	0.161242	0.756363	0.376955	-0.072133	-0.965382	-0.64498	0.682862	0.0973502	-0.301733
190	-0.262706	0.299995	-0.304946	-0.978399	0.917138	-0.816494	-0.774294	0.994541		0.774391	-0.901788	-0.885186	-0.596832	-0.461598	0.368204	0.0734983	-0.999774	0.798114	0.261373	0.853934	-0.510521	-0.459159	0.0362573	0.883404	0.852918	0.855365	0.662574	-0.92715	-0.918062	0.880271	0.818477	0.537229	0.997369	0.970252	-0.888446	0.757327	-0.408171	-0.220234	-0.256236	-0.996038	0.129204	0.128808	-0.750742	0.4059	-0.392721	-0.459266	0.0728597	-0.689088	-0.830419
191	0.885776	-0.107152	-0.0972808	-0.435054	0.879707	0.13413	-0.902285	-0.662474		-0.450761	-0.252055	0.54666	-0.456668	-0.195907	-0.659508	0.445862	-0.395204	0.963518	0.668801	0.684328	0.73944	0.510961	-0.0333322	0.983048	-0.37227	0.99977	-0.707107	-0.0232495	-0.999407	-0.221106	0.768221	0.999735	-0.985147	-0.823146	0.638825	0.370437	0.188072	-0.997675	-0.80349	-0.99248	0.33035	-0.848547	0.401428	-0.334765	0.710072	-0.0781654	-0.734989	0.894343	0.980699
192	0.118213	0.909103	0.633041	-0.365589	0.865829	-0.302357	0.987757	0.944099		-0.560347	0.6549	-0.652386	-0.155632	-0.709936	0.380148	-0.215886	0.111388	-0.74014	0.989731	0.998277	-0.679287	0.859647	0.410176	-0.955381	0.879329	0.838884	0.604364	-0.98358	0.867521	0.707693	-0.453802	-0.845489	-0.484639	0.787075	-0.771109	-0.808182	-0.413965	-0.922839	0.0835775	0.0450669	-0.314447	0.0729756	-0.101725	-0.977868	-0.381135	-0.425736	-0.311318	0.756603	-0.992777
193	0.779354	-0.939987	-0.538265	-0.754321	-0.805489	0.35489	-0.809195	-0.251766		-0.998243	-0.946773	0.902362	-0.397625	-0.764659	-0.102899	-0.916604	-0.245023	-0.993415	0.163812	-0.928168	0.999875	0.792239	0.536233	0.992425	-0.58827	0.668272	0.377897	0.645005	-0.834264	-0.303013	0.956492	-0.767582	0.872028	0.608638	-0.70244	-0.857702	-0.689938	0.620236	-0.479542	-0.0653198	-0.432329	0.175748	-0.671411	-0.842226	-0.982747	-0.777511	-0.610015	0.298459	-0.195222
194	0.910403	0.157991	0.650363	-0.662038	-0.996302	-0.261121	-0.978195	-0.629164		0.362415	0.0189966	0.902887	0.260686	-0.930821	-0.0826181	0.821402	0.738766	0.687321	-0.31231	0.998035	-0.709289	0.184598	0.678506	0.531377	-0.321582	0.812315	-0.730894	-0.9999	0.759257	-0.690397	0.0258216	-0.974485	0.128179	-0.282978	-0.999263	-0.95318	0.884367	-0.230662	-0.935529	-0.845417	0.442446	-0.853041	0.546594	0.379956	0.677238	0.560365	-0.474496	-0.204334	0.342
195	-0.163641	0.117027	-0.872462	-0.732283	-0.328428	0.825991	0.973868	0.754815		0.477558	0.760178	-1	0.177095	0.378067	-0.983638	0.888768	-0.342662	0.425521	0.46364	0.933898	-0.972921	0.193458	-0.521062	0.863946	-0.20923	0.986854	0.307032	0.952769	-0.849233	-0.879433	0.988676	0.973922	-0.944373	0.905173	-0.940043	0.991532	-0.937469	-0.927118	0.969009	-0.0500511	0.323787	0.828975	0.572589	0.898881	-0.228156	-0.908019	0.663833	0.288415	-0.946529
196	0.363934	-0.979814	0.479542	-0.774482	0.165323	-0.337531	-0.618111	-0.643192		-0.241633	0.859926	0.997658	-0.321185	-0.506344	0.852207	0.177251	-0.0596761	0.189198	0.901076	-0.671582	-0.67357	-0.361719	0.0993677	-0.981855	0.412794	0.986141	0.102275	0.270152	-0.834945	0.971422	0.0812123	-0.94686	0.941191	-0.810033	0.00655724	-0.876667	-0.999992	0.918822	-0.553341	0.188517	0.999977	0.119145	-0.413453	-0.883371	0.846486	-0.40516	-0.83405	0.9926	-0.713336
197	0.667977	-0.0964643	0.70635	-0.681318	0.712457	0.238379	0.915707	-0.144602		0.097712	-0.2732	-0.678111	0.109157	0.347589	-0.688508	0.803053	-0.991685	-0.721742	0.976368	-0.933527	0.455315	0.993016	0.570546	0.294086	-0.0295729	0.996637	-0.224329	0.272471	0.993919	-0.0358907	0.468167	0.989111	-0.890043	0.999186	-0.917162	-0.955144	-0.465984	-0.976553	-0.317816	-0.789634	-0.685948	-0.50771	0.111066	0.715628	0.686714	0.25101	-0.843582	-0.837175	0.69589
198	0.210145	0.469993	-0.443861	0.209457	-0.959417	-0.0659481	-0.333406	-0.933881		-0.95007	-0.0504125	0.841034	0.0365301	0.76275	0.351865	-0.314777	0.9115	0.7614	0.747795	0.971755	-0.934715	0.984328	-0.21845	0.746555	0.120331	0.872448	-0.378833	-0.813089	0.997036	0.879951	0.0223269	0.583111	0.530936	-0.32247	-0.965526	0.936178	-0.385392	0.939537	0.910505	0.399927	-0.34863	0.0231004	-0.538475	-0.0742625	-0.590706	0.443063	-0.998195	0.969651	0.0132967
199	0.76898	0.609515	0.220826	0.56921	-0.885417	-0.174248	0.963825	-0.660446		0.789242	-0.981835	-0.542617	0.266687	0.0634922	0.278414	0.628337	0.259395	0.897323	0.277103	-0.971237	-0.452452	0.860665	-0.927884	-0.984706	0.170796	0.792934	-0.236639	-0.813519	-0.941581	-0.0356045	0.988339	-0.910846	-0.850052	0.775013	-0.773913	-0.661201	0.416362	-0.450792	-0.834192	-0.34427	0.871129	-0.413133	-0.196382	0.78652	0.983564	-0.0205839	-0.966263	0.155963	-0.859879
200	0.757393	-0.771577	0.318502	0.0697224	0.746116	0.459423	-0.295149	0.442948		0.797867	0.993068	0.651266	-0.0242255	0.277814	0.0317894	0.476088	-0.86306	-0.940223	0.211082	0.801846	-0.899314	0.353519	-0.722642	0.982065	-0.985202	0.999479	-0.565348	0.252716	-0.986647	-0.74875	0.269658	0.861641	0.3989	-0.714237	0.973528	-0.34411	-0.953733	0.767918	0.984442	-0.429218	-0.687771	0.536647	0.656286	0.42419	-0.674769	0.00459285	-0.657524	0.851265	-0.42779
201	-0.384463	-0.727461	0.998083	0.828763	-0.923403	-0.344666	-0.999492	-0.848759		-0.382725	-0.996825	-0.979924	-0.0321584	0.439621	-0.97092	0.995218	0.668965	-0.997385	-0.402897	-0.486207	-0.811382	0.999374	0.517353	-0.987763	0.996294	-0.0296899	-0.0413756	0.52656	0.989297	-0.652737	0.475362	-0.992074	-0.959327	-0.255673	-0.407574	-0.73055	0.368048	0.615922	-0.523241	-0.418659	0.393416	0.794951	0.924176	-0.983261	-0.0975714	-0.202569	-0.752537	0.922762	0.47818
202	-0.437948	-0.8421	-0.499548	0.230466	-0.996428	-0.200425	0.75674	-0.692411		-0.70009	-0.752638	0.00508345	-0.176998	0.0969908	-0.289256	-0.191606	-0.810925	0.758884	-0.352168	-0.938437	-0.711509	0.999534	-0.524009	0.796362	0.153759	0.970143	0.248894	0.227493	0.904956	0.606217	0.125471	0.917403	0.978239	-0.311477	-0.333346	-0.477967	-0.532226	0.942178	-0.240549	-0.868698	0.116841	-0.846637	0.0117179	-0.621517	-0.176745	-0.184594	-0.503434	0.768112	-0.125552
203	-0.106853	-0.797987	-0.637498	0.38262	0.0473776	0.979987	-0.518098	-0.0308841		-0.242536	0.983499	0.6769	-0.365875	0.545998	-0.167905	0.777668	-0.17175	-0.612173	-0.110771	0.812661	-0.979968	0.557793	-0.180362	-0.713343	-0.332569	0.906861	-0.425981	-0.944005	-0.968367	0.059267	0.295383	0.876947	0.971411	0.488488	0.504474	-0.971754	0.809942	0.994251	0.998913	0.0885398	0.117409	0.902371	-0.218614	0.529999	-0.0554033	0.0372235	-0.876419	0.249878	-0.993916
204	0.216311	0.133801	0.955507	0.313503	0.183013	0.239799	-0.565805	-0.80833		0.83205	-0.789613	-0.290482	-0.27146	0.37349	0.814791	0.0122942	0.346078	0.760862	0.058342	0.956134	-0.294179	0.864175	-0.145748	0.98262	0.697865	0.965993	0.997792	-0.700468	0.194684	-0.187381	0.267215	-0.410605	-0.998344	-0.77179	0.436159	-0.564309	0.948683	0.672335	-0.22553	-0.916522	-0.255041	0.977542	-0.338948	0.749458	-0.03019	-0.402644	-0.858902	0.949595	-0.00777179
205	-0.966874	-0.621604	-0.707107	0.719431	0.218638	-0.999568	0.999995	-0.0904461		-0.85807	-0.684552	-0.310519	-0.785708	0.639538	0.797334	-0.123932	-0.989763	-0.945392	-0.549624	-0.984449	-0.986009	0.836636	-0.677101	-0.994333	-0.0190277	0.971488	-0.0887572	0.98523	0.986177	-0.604421	-0.450414	-0.998429	0.947681	0.352821	0.757385	0.965085	-0.859293	0.999282	0.208848	0.0479448	0.307264	-0.190259	-0.340274	-0.949168	0.0198689	-0.571175	-0.659156	0.999423	-0.963562
206	0.168735	-0.163641	-0.40725	-0.200106	-0.79419	0.0859552	0.074468	0.952707		-0.332225	0.45518	0.246981	-0.243627	-0.322566	-0.100377	0.106224	-0.920115	0.901511	0.209714	0.78353	-0.212712	0.292526	-0.969577	-0.561152	0.625435	0.935558	-0.285181	-0.672172	-0.970679	0.902439	-0.109739	0.714641	0.520942	-0.372316	0.999892	-0.221598	0.600474	0.577905	0.828957	-0.999794	0.882704	-0.208064	0.182812	-0.0446758	0.5961	-0.439703	-0.614384	-0.974994	0.196804
207	-0.945666	-0.97246	-0.408466	0.858293	0.759446	-0.00837492	-0.999882	-0.720087		-0.11701	-0.872992	0.417245	0.0302891	-0.0719286	-0.5547	0.711568	0.282025	0.720654	-0.602281	-0.884438	-0.965295	0.703596	0.664263	0.975216	0.20885	0.727481	0.709686	-0.931356	0.962786	-0.0378789	0.911663	-0.876094	-0.978202	-0.978846	-0.974965	0.411384	-0.872739	0.748563	0.0378516	-0.601494	-0.698001	-0.119666	-0.345918	-0.00508124	-0.144198	0.981079	-0.997302	0.998776	0.00553242
208	-0.728995	0.271957	0.956934	-0.3061	0.793674	0.998503	0.85706	-0.946972		0.0995037	0.997321	-0.752215	-0.257077	0.64322	0.146352	0.695915	0.734198	0.939518	0.845708	0.926351	0.20206	0.405826	0.0452083	0.645942	0.449636	0.802418	-0.12345	0.783397	-0.984439	-0.564491	-0.734415	-0.0540724	0.895675	0.819232	0.921394	-0.816702	0.885853	0.628267	-0.986682	0.435592	0.560043	-0.43854	0.882434	-0.476378	0.5961	-0.567667	-0.999966	0.842137	0.447214
209	-0.78971	0.970774	-0.506104	0.152608	0.0559868	-0.437691	0.977966	0.522997		-0.312041	-0.875329	0.775451	0.195353	0.579109	0.156385	0.290061	-0.171859	-0.994446	0.033923	-0.962631	0.359426	-0.783746	-0.124757	-0.942292	-0.836619	0.173033	-0.810884	0.153441	0.649047	0.372643	-0.337702	0.856988	-0.906789	0.949092	0.989054	0.508729	-0.219038	-0.645555	0.112844	-0.810193	0.996569	-0.234235	-0.613764	0.612572	0.913588	-0.0539251	-0.465009	-0.139609	-0.945283
210	-0.995548	-0.252455	0.54362	-0.0725851	-0.996317	0.26272	0.78877	-0.799508		0.164062	0.968269	0.266335	-0.162423	0.299208	-0.667229	-0.963825	-0.503054	-0.434528	0.099831	-0.719532	-0.409673	0.96029	0.787686	0.990954	0.385997	0.210382	0.0099005	-0.155493	-0.819198	-0.992132	0.619002	-0.711024	0.900866	-0.959707	0.901535	-0.894283	-0.139288	0.395308	0.336079	-0.98178	-0.773449	0.802359	0.204095	0.739022	-0.829452	-0.960592	-0.934609	0.991838	0.727085
211	-0.449406	-0.86538	0.15477	0.358463	0.808979	-0.990117	-0.66882	-0.750097		0.64468	-0.974242	-0.109233	-0.00563145	-0.52032	0.745938	0.493931	-0.793606	0.970084	-0.156265	0.927356	-0.30404	0.529101	-0.000629723	-0.964152	0.895092	0.292383	-0.0472778	-0.704091	-0.652918	0.93907	0.374463	-0.531059	-0.922709	-0.139352	0.890584	0.573462	0.881648	-0.318788	-0.781899	-0.574132	0.727639	-0.640001	-0.599307	0.944362	0.81775	-0.717279	0.608797	-0.840895	-0.473248
212	0.263752	-0.899887	-0.567337	-0.0904338	0.630551	0.999998	0.541875	-0.30803		-0.934177	0.505981	-0.595824	-0.296582	0.445328	0.944179	0.600873	-0.661494	-0.865471	-0.590481	0.870891	-0.336056	0.958138	-0.991905	-0.603792	-0.070319	0.0552184	-0.167054	0.914367	0.992848	0.857896	-0.233578	-0.965703	0.999298	0.788138	0.996937	-0.858681	0.143244	-0.0377353	0.122614	0.959089	-0.447214	-0.950739	0.521271	-0.885408	0.475248	-0.745961	-0.53563	0.999815	-0.196116
213	0.999472	0.259633	-0.149738	0.106326	0.216472	-0.714045	0.993728	-0.235574		0.83822	-0.0971939	0.0431491	-0.246542	-0.113043	-0.667794	0.80232	-0.52037	-0.670553	0.278784	-0.968093	0.913487	0.996389	-0.666129	-0.970479	-0.358659	-0.120684	0.996177	-0.827284	0.91449	0.202025	-0.00668137	0.999944	-0.889514	0.0531909	0.934784	0.380603	-0.993884	0.293959	0.442758	-0.173988	0.403273	0.937708	-0.118843	0.797187	-0.999953	0.396577	-0.939185	0.303204	0.0678433
214	0.986675	-0.242156	-0.705433	-0.436111	-0.984186	0.0676413	0.667692	0.393771		0.857049	-0.744492	-0.869561	-0.295052	-0.997474	0.359098	0.0834517	-0.63518	0.993123	0.953739	0.958168	0.967778	-0.843931	-0.157483	-0.873635	-0.415175	0.363317	-0.763831	-0.620125	-0.909533	-0.999472	0.496342	-0.979768	-0.898096	-0.440482	0.802145	0.0496829	0.957127	-0.337226	0.0814446	-0.293852	-0.932477	-0.731191	0.999978	-0.9916	-0.240616	-0.721695	-0.597089	-0.529691	-0.867344
215	0.589128	-0.985972	-0.0660925	-0.445642	-0.999762	-0.702808	-0.686035	-0.617107		-0.907643	-0.483867	-0.966773	-0.120994	-0.921787	-0.32742	0.950445	0.679361	-0.949356	0.523468	-0.963173	-0.406464	0.663701	0.912884	0.788293	0.599094	-0.337981	0.261098	0.939044	0.992115	-0.921802	0.536675	-0.510057	-0.355257	0.480808	0.880922	-0.54512	-0.760096	0.0496393	-0.201104	-0.9763	0.987026	-0.519087	-0.672181	0.453031	0.93137	-0.66248	-0.724225	0.434042	0.110738
216	0.898191	0.821915	0.914393	0.197649	-0.575232	0.661622	0.981155	-0.987742		0.688889	0.470684	0.985262	0.0918065	-0.806121	0.889083	0.749493	-0.0455224	0.997249	0.694687	-0.852858	-0.999018	0.642156	0.546609	-0.908798	0.965927	-0.507805	-0.141263	-0.667692	-0.95716	-0.293557	-0.826022	-0.933722	0.959018	-0.829367	-0.525969	-0.560198	0.286665	-0.761293	-0.552594	0.233963	-0.719947	0.691376	0.0899826	0.616564	-0.34665	0.536875	0.0541028	0.824774	-0.20253
217	0.95728	-0.980581	0.34966	-0.416993	0.793765	0.445413	0.903186	-0.574559		-0.921241	0.894427	0.856878	-0.0447597	-0.133065	-0.998858	0.954456	-0.156506	0.99148	0.811086	0.947854	-0.449637	0.172989	-0.100009	0.940623	-0.646949	-0.165996	0.941114	0.742024	0.907431	0.865561	-0.968313	0.941441	-0.988831	0.46529	-0.14632	0.226241	0.956075	0.996241	0.6238	-0.978377	-0.944304	-0.99884	0.0807712	0.42781	0.129794	-0.302328	-0.364585	-0.819713	0.0678321
218	0.991373	-0.573397	-0.763121	0.692032	0.45617	0.680997	0.911922	-0.947275		0.117476	-0.930089	-0.211251	-0.2427	0.625641	0.0217704	0.994592	0.0985775	-0.992166	0.774575	-0.941982	-0.733312	0.814513	0.382973	-0.836928	-0.987846	-0.235724	-0.998387	-0.990424	-0.980125	0.967057	0.829019	-0.987246	0.712795	0.792816	-0.299323	0.570203	-0.164399	-0.308139	0.537159	0.993977	0.930642	0.215629	-0.287987	-0.724999	-0.552368	-0.987262	0.205799	0.95085	0.774163
219	0.285189	0.439847	0.082396	-0.252946	0.917966	-0.991926	0.68913	-0.343061	0	-0.15423	-0.994976	-0.246679	0.453276	-0.114378	0.876454	0.561784	0.234451	0.872991	0.206187	0.981223	-0.772969	0.24124	-0.00689639	-0.107753	0.762212	-0.424421	0.74469	0.358979	0.513974	-0.99796	0.941022	-0.0639259	-0.946044	-0.594681	0.200474	-0.972705	-0.576824	0.433631	0.921635	-0.560639	0.316549	-0.969951	0.737855	0.570868	0.016351	0.998491	-0.121143	0.146195	-0.839193
220	0.976096	-0.999543	1	-0.252085	-0.97891	-0.915971	0.565257	0.507459	0	-0.934651	0.974274	-0.577264	-0.267531	0.475642	-0.814212	0.897023	-0.786803	0.954235	-0.255379	-0.954755	-0.431924	-0.914568	0.607353	0.0127541	-0.962025	-0.431952	-0.400679	-0.633067	-0.703841	0.533846	-0.608875	0.787379	0.972515	0.175791	0.999117	0.847246	0.643939	0.397357	-0.98652	-0.504829	-0.585527	0.564711	-0.0312033	-0.998011	-0.460044	-0.967802	-0.296838	-0.965385	0.999076
221	0.935586	0.591049	0.158157	-0.637608	-0.920882	0.875002	-0.996887	-0.865982		0.606549	-0.946347	0.927203	-0.570168	0.244942	-0.970722	0.430906	0.847593	-0.999888	-0.277214	-0.994293	-0.758479	0.252207	-0.732632	0.251421	0.941234	-0.39796	0.222749	-0.725856	-0.910538	0.781222	0.785138	-0.961216	0.943012	-0.499041	-0.295664	-0.998533	-0.694793	-0.254611	0.155687	-0.921588	-0.285221	-0.956781	0.15838	0.222795	0.0778706	0.150082	-0.529393	0.963698	-0.98824
222	0.986368	0.134985	-0.625946	-0.99411	-0.346806	0.959771	0.783746	-0.792298		-0.375484	-0.970646	-0.186641	-0.404766	0.745304	0.969152	-0.481025	-0.391659	-0.789004	-0.347892	0.952994	0.170541	0.993794	0.520037	0.983489	0.583045	-0.473621	-0.952868	0.88036	-0.0546446	-0.828977	-0.497323	-0.991735	-0.822066	-0.416097	-0.310402	-0.406582	0.174912	0.589044	0.536269	-0.120732	0.354276	-0.426967	-0.862812	0.856169	0.834958	0.109136	-0.233848	0.564264	-0.158445
223	0.903381	-0.0868947	-0.170346	-0.243007	0.912113	-0.380783	-0.977149	0.136745		0.998388	0.130399	-0.258207	-0.196278	-0.648571	-0.557332	0.597312	-0.79239	0.892547	-0.997876	0.704907	-0.727864	0.338312	-0.746332	-0.993467	-0.965558	0.0687272	0.120056	0.303318	0.271544	-0.0109283	-0.0145616	-0.143965	0.0149983	0.413966	0.816992	-1	-0.89561	-0.0829591	-0.988476	-0.365414	0.897246	0.117851	-0.983737	-0.220451	-0.481803	-0.407357	-0.360561	-0.149174	0.295684
224	0.922754	0.992304	-0.156581	-0.359452	0.0769287	0.429218	0.550731	-0.702847		-0.82458	-0.841366	0.989639	-0.787726	0.560354	-0.767914	0.901903	-0.0963242	0.431869	-0.657643	-0.747446	-0.946972	0.17197	0.774253	0.834939	0.762747	0.0127419	0.324807	0.429719	-0.705543	0.761002	0.487009	0.345705	-0.865977	-0.952693	0.226839	0.961489	0.75696	0.376226	0.998793	-0.997161	-0.9876	0.908677	0.995761	-0.669367	0.980408	0.434915	0.134716	0.0883163	-0.353622
225	0.906431	-0.934722	0.0710577	-0.202667	-0.49465	-0.398301	0.958268	-0.472436		-0.564073	0.80781	0.00895486	-0.636417	-0.999236	0.150754	0.99323	0.29806	0.960923	-0.56349	0.96489	0.721988	-0.670997	-0.320847	0.991829	-0.883101	-0.362847	0.0627374	-0.776701	0.725754	0.987492	-0.0623783	0.141288	0.61686	0.76686	-0.0825201	-0.634973	-0.470757	-0.597413	-0.0986989	-0.527513	-0.452692	-0.83205	0.743801	0.48392	-0.890222	-0.902861	0.0251669	0.977485	0.299857
226	0.937615	-0.576422	0.17238	0.042102	0.483077	0.124035	-0.82846	0.644645		0.835679	-0.998939	0.82331	-0.150759	0.601435	0.946992	0.964092	-0.377496	-0.995313	-0.0978257	0.944836	-0.945798	0.940735	0.831265	-0.986514	0.782223	-0.150903	0.21139	0.96211	0.304691	0.776685	-0.441768	0.379586	-0.821827	-0.920087	-0.148883	0.772335	0.564684	0.0644913	0.996316	-0.62407	0.526696	-0.764911	-0.964901	-0.762953	-0.571693	0.0324738	-0.288418	0.972755	0.09457
227	0.994829	0.187024	-0.142132	0.85575	-0.0411837	0.374463	0.979691	-0.917763	0	-0.246528	-0.934325	-0.00645148	-0.236992	0.541221	-0.907959	0.662584	-0.960188	0.998237	-0.243801	-0.919319	-0.932361	-0.332479	-0.466561	0.987779	0.240884	-0.74617	-0.564328	-0.471033	-0.636256	-0.980179	0.983177	-0.91763	0.754994	-0.934034	-0.977318	-0.779509	0.878127	-0.406406	0.0855114	-0.647526	0.210427	0.542668	0.79742	-0.997432	0.778876	-0.0269462	-0.384659	-0.00358421	-0.207926
228	-0.996241	0.407205	0.0982266	0.238545	-0.00210526	-0.0416305	-0.474574	-0.71778	0	-0.231979	0.161969	-0.993223	-0.619155	0.438111	-0.638699	0.716539	0.159726	0.517674	-0.559764	0.974821	-0.464872	0.14648	-0.968803	-0.461113	-0.859152	-0.951394	-0.230784	0.553678	0.633798	-0.892164	-0.863684	0.98863	0.0297609	0.577523	-0.236168	0.510942	-0.735033	0.265531	0.988963	0.916994	0.185367	-0.757262	-0.441032	0.0246604	-0.933194	0.346103	-0.901782	-0.518302	-0.467618
229	0.743376	-0.437444	-0.030546	0.714031	-0.232696	-0.0375071	0.10002	0.997812	0	-0.615484	0.0858883	0.127224	-0.472085	0.0729646	0.41682	-0.963614	0.150043	0.376149	-0.25573	-0.391083	-0.476363	0.855748	-0.999363	-0.815086	0.774385	-0.578747	0.162083	0.222285	-0.997734	0.675081	0.798189	-0.99593	-0.0159342	0.315061	-0.380705	-0.460754	-0.183025	0.983962	-0.0614671	-0.9981	0.416919	0.664364	0.088602	-0.2356	0.99194	0.165244	-0.216692	0.809579	0.47016
230	0.179902	0.366025	0.239174	-0.170519	-0.19906	0.0458909	0.595081	-0.827903	0	0.970753	-0.970294	0.393405	-0.850248	0.668528	0.239991	0.0294816	0.648246	-0.294853	0.659057	0.993276	-0.404961	0.0859979	-0.0747614	-0.849012	0.501517	-0.670837	0.0914175	0.201414	0.82226	0.749319	-0.809642	0.907903	0.0680239	0.402274	0.780718	0.893542	0.116434	0.760782	0.716576	0.982387	-0.843147	0.903527	-0.0525588	-0.368966	0.234748	0.0702831	-0.475007	-0.373901	-0.152552
231	0.73575	-0.99399	-0.995923	-0.240093	-0.101416	-0.307462	0.00168067	-0.965843		-0.879465	0.644003	-0.260925	-0.622372	0.327273	-0.322485	0.0669691	-0.99607	0.362074	0.942122	-0.956435	0.315872	0.131732	-0.323524	0.375651	-0.922492	-0.390293	-0.0785711	0.501878	-0.970926	0.901167	-0.756079	-0.766052	-0.270149	-0.540788	0.961861	0.456592	-0.285593	0.958159	-0.331486	-0.672584	-0.562933	-0.950127	0.532561	-0.44373	-0.52973	0.117259	-0.623822	0.523553	0.284482
232	0.998768	-0.473077	0.724105	-0.197791	-0.876969	0.949086	-0.955867	-0.856835		0.963778	-0.660204	-0.714189	-0.795637	0.579514	-0.235082	0.483906	0.496018	-0.992562	0.861189	-0.967046	-0.0353761	0.99441	-0.0309711	0.791969	-0.995995	-0.727218	-0.0684719	0.5871	0.915169	0.849928	0.904249	-0.699703	0.940967	0.237808	-0.906941	-0.986394	-0.465476	-0.744643	0.855066	-0.368531	0.744405	-0.981767	0.399529	-0.118999	0.964416	-0.43921	-0.837867	0.9014	-0.0727712
233	0.984573	-0.845984	-0.180529	-0.199334	-0.83288	-0.999953	0.971165	-0.35217		-0.967381	-0.153962	0.87918	-0.62831	0.27081	-0.646621	-0.34589	-0.807666	0.998895	0.893295	0.939723	-0.134053	-0.131589	-0.495817	0.0921744	0.642537	-0.585809	0.852808	0.905508	-0.8727	-0.745025	-0.526848	0.997514	-0.968089	-0.613471	-0.353841	-0.952794	-0.69623	0.191876	-0.147311	-0.379382	-0.745955	0.865718	-0.147281	-0.944695	-0.122871	0.228179	-0.99997	0.945667	0.273436
234	0.563704	0.337947	-0.6587	0.00506536	-0.848255	0.16283	-0.97576	0.393919		-0.68947	0.923455	0.575672	-0.996577	0.498451	0.515504	0.828656	0.192289	-0.844198	0.98551	0.0334788	-0.186263	0.684445	0.0934855	0.412804	0.582833	-0.61576	-0.524968	0.00595819	0.999974	0.944927	0.363328	-0.85391	-0.335884	0.997394	-0.950237	0.973671	0.97927	-0.94217	0.948322	-0.985695	0.628875	0.774907	-0.695378	0.882882	0.595959	0.704328	-0.946958	-0.0288897	0.809171
235	0.60937	-0.991061	0.699356	0.262899	0.484809	0.166245	0.696762	-0.927415		0.999734	-0.00674521	-0.883697	-0.948165	0.304322	0.1279	0.94812	-0.416983	0.977171	0.144454	-0.981969	0.212537	0.136264	-0.462934	-0.995721	0.40366	-0.804811	0.0726645	0.77207	-0.447214	-0.997797	0.427739	-0.557972	-0.949175	-0.37652	-0.894427	-0.423462	0.0638354	0.29657	0.98416	0.596935	-0.790475	0.459929	0.993491	-0.821736	0.838258	0.571369	-0.962989	0.938741	-0.965232
236	-0.0683194	0.0478493	0.185317	0.874728	-0.387126	-0.0190717	-0.0928613	0.335152		-0.576784	-0.918015	0.129167	-0.50491	0.428544	-0.0120017	0.273702	0.094775	-0.790645	0.0919634	-0.308034	0.0672523	0.104614	-0.976729	0.223634	-0.207744	-0.421134	-0.0573939	-0.154377	-0.937704	-0.995811	-0.0979221	-0.520824	0.903874	0.820693	0.73513	0.295952	-0.114898	0.176837	0.268375	-0.181908	0.936764	-0.344962	-0.664017	0.216869	0.558559	0.302075	-0.744684	-0.99889	0.993507
237	0.294465	0.188649	-0.51632	0.655554	0.804614	0.283155	0.57872	-0.977154		-0.994134	0.90052	0.288639	-0.891627	0.360666	0.103912	0.872837	-0.111501	0.763338	0.136293	-0.860363	-0.184842	0.225621	-0.464787	0.848698	0.794657	0.126515	0.192247	0.983216	0.992101	0.97972	0.125925	0.909039	-0.675081	-0.966988	-0.83073	-0.98685	0.857903	-0.164399	0.671623	-0.367083	-0.745037	0.248668	0.218917	-0.54851	-0.478571	0.313724	-0.908593	0.911724	0.0230844
238	-0.176299	0.327159	-0.962621	0.724416	-0.791877	0.616036	0.989058	-0.735769		0.309989	-0.602926	-0.889258	-0.88758	0.375502	-0.777603	0.999418	-0.582112	-0.547123	0.667179	0.745789	0.0475651	0.982564	-0.687686	0.999764	0.477913	-0.0348048	-0.516593	-0.869873	-0.900354	0.625672	-0.996352	-0.624695	-0.922889	0.806106	0.600334	0.27881	-0.983695	0.182908	0.852302	0.166148	0.659508	-0.773281	0.927702	0.192569	-0.446566	0.0992751	-0.914054	-0.345504	0.695298
239	0.980347	-0.213228	0.254401	0.741835	-0.376165	-0.345066	-0.111094	0.937334		-0.0230535	0.0861855	0.153287	-0.667342	-0.060424	0.162088	0.998348	0.528274	0.96837	0.35398	0.86627	-0.244184	0.991315	-0.773449	-0.999931	-0.477397	0.196037	0.131934	0.919851	0.598787	-0.921941	0.887776	-0.137017	-0.726717	-0.507589	-0.237905	0.335919	0.743179	0.38756	0.149586	0.934488	0.675725	0.951445	0.349077	-0.882767	-0.421525	0.0478605	-0.791569	-0.996264	0.464383
240	0.294238	0.0809898	0.0813064	0.616051	0.821199	0.111434	0.257725	-0.164798		0.603296	0.748822	0.281858	-0.510951	0.60183	0.147107	0.229697	-0.000717875	-0.50153	0.23189	-0.784958	0.740792	-0.0638753	0.184027	0.782662	0.141211	-0.324664	0.213961	0.134993	-0.0546942	0.983408	-0.146893	0.778516	0.237723	-0.514496	-0.145669	0.500754	-0.293428	-0.455196	0.597853	-0.686522	0.383825	-0.116082	-0.251644	-0.3737	0.706521	0.519842	-0.97702	0.923993	-0.999408
241	0.0759703	-0.461657	-0.164078	0.981938	0.417365	-0.15369	0.122496	-0.402598		-0.757028	-0.711215	0.0560614	-0.643771	0.169695	-0.244656	0.493442	-0.919096	0.618612	0.285406	0.911652	0.171532	-0.102666	-0.479227	-0.496068	0.695389	-0.173949	-0.998986	-0.124608	-0.0609878	0.219215	0.0751458	-0.99808	-0.663827	0.625515	0.135676	-0.317581	0.0442972	0.838188	0.0793784	0.483805	-0.691879	-0.222372	0.250692	-0.452231	0.188454	0.155445	-0.76435	-0.958818	0.643878
242	-0.342724	-0.44143	0.053331	0.796259	-0.999374	-0.24088	0.59361	-0.926894		-0.943197	0.875763	0.192126	-0.833538	0.29617	-0.251175	0.634216	0.651258	-0.925091	0.171703	0.994652	-0.701883	0.879275	0.33684	-0.0898253	-0.99878	-0.417158	0.140006	0.589335	-0.729022	0.730842	-0.509906	-0.178619	0.798589	0.964525	-0.797286	-0.291162	-0.99759	0.748958	0.290073	-0.158757	0.487875	0.0172719	-0.234001	0.491503	0.841341	0.422825	-0.95397	0.999008	0.729676
243	-0.43456	0.0293559	-0.846392	0.925141	-0.818631	0.996708	-0.998086	-0.67244		0.981636	-0.992957	0.768221	-0.490873	0.193691	-0.420312	0.999603	0.894039	0.697933	0.158862	0.992027	0.412625	0.797092	-0.466662	0.957605	0.0240894	-0.228361	-0.616255	0.450853	0.965968	0.239223	0.669329	-0.848396	-0.95434	0.0678259	0.252948	0.949938	0.211131	-0.129067	0.992152	0.99999	-0.0962809	0.291861	0.157738	-0.843457	0.11291	0.530505	-0.88551	0.556738	-0.457775
244	-0.601815	-0.0229024	-0.0641533	0.987426	0.444724	-0.145708	0.952008	0.969922		-0.479417	0.845299	-0.321418	-0.212394	0.215658	0.366959	0.246914	-0.413206	-0.324829	0.161989	-0.996892	0.687059	0.517548	0.105422	0.418546	0.696786	-0.158062	0.585005	0.994743	-0.803175	0.839994	-0.468693	0.684805	0.999963	-0.361813	-0.764239	-0.506182	0.0492706	-0.390012	0.512775	-0.644497	0.975285	-0.23973	-0.314921	0.336205	-0.362879	-0.00443783	-0.813853	0.0109198	0.385556
245	-0.304269	-0.271664	0.172158	0.940605	-0.215668	0.335598	-0.610058	-0.616755		0.418605	0.137387	0.594284	-0.570488	0.26499	-0.438558	-0.200889	0.748876	0.337492	-0.323823	0.28172	-0.3532	0.030546	-0.894904	0.235395	-0.295953	-0.632062	-0.762877	0.383934	0.402454	0.0262503	0.34114	-0.736448	0.0826234	-0.0777344	0.0867256	-0.876784	0.0235016	0.48648	0.241395	-0.301064	-0.857088	0.510024	0.572729	0.0723979	-0.436138	0.834548	-0.924334	-0.284682	-0.551365
246	-0.490826	-0.814525	0.0842829	0.568309	-0.0556827	0.325513	0.832681	-0.961957		-0.633481	0.993249	-0.777245	-0.523213	0.0962476	0.149485	0.901768	-0.0478644	0.134783	-0.556787	0.733011	0.246297	0.474447	-0.288974	-0.762286	0.0660804	-0.397142	0.688006	0.986059	-0.998854	0.318341	-0.141676	0.495101	0.194125	0.453593	-0.749811	0.48975	-0.629111	0.83742	0.657934	0.409922	-0.243455	0.152057	-0.24688	-0.538916	0.985142	0.251896	-0.791156	0.9103	0.956674
247	-0.0373073	-0.814042	0.0148867	0.99962	0.744774	-0.26963	0.527489	-0.392286		0.175791	-0.195717	0.797497	-0.677167	0.273296	0.304195	0.0431696	0.0237695	-0.612034	-0.392439	0.695357	0.260557	-0.0710068	-0.662444	0.0888998	-0.154486	-0.948303	-0.486165	-0.195545	0.341442	0.93914	-0.726552	0.991194	0.39145	-0.272603	-0.0637886	0.78206	-0.983592	0.176855	0.962383	-0.499384	0.291134	-0.699993	0.513783	0.893038	-0.820358	0.988878	-0.987587	-0.726091	0.94299
248	-0.975584	0.161551	-0.908602	0.733264	-0.100961	-0.220496	0.699064	0.650721		0.971309	-0.114723	-0.251131	-0.683539	0.112777	-0.760472	0.317154	-0.452018	0.352115	-0.897203	-0.99719	-0.444901	0.954084	-0.36557	0.253288	-0.55027	-0.937026	0.316228	0.880276	-0.476283	-0.997066	-0.91653	-0.968243	-0.694315	0.974473	0.999935	-0.445583	-0.703486	-0.965596	0.99783	0.274449	-0.666039	-0.962871	0.575388	-0.17683	0.490373	0.0851711	-0.762504	0.518871	-0.258632
249	-0.719654	-0.168192	0.631165	0.776945	-0.769099	0.971437	-0.523902	-0.163773		-0.98543	0.995938	0.961524	-0.663981	0.0439686	0.574518	-0.148968	0.999934	-0.0365205	-0.371509	0.970677	0.997483	0.993991	-0.0408295	-0.795829	0.842091	-0.999431	-0.196939	0.227298	-0.947755	-0.566905	-0.437724	-0.957606	0.949243	-0.742984	0.488961	-0.971668	0.884621	-0.531509	0.439314	-0.00899244	0.881297	0.70179	-0.534628	0.851318	-0.380325	0.862446	-0.772975	-0.998794	-0.964098
250	-0.342959	-0.973658	0.910071	0.568483	0.387892	-0.978085	0.0463079	-0.0340825		-0.605234	-0.296399	-0.998131	-0.184435	0.389018	0.382352	0.929541	0.119884	-0.209419	-0.92564	-0.975672	0.575954	-0.373359	0.00198675	0.449055	-0.353757	-0.728644	0.0225846	0.953609	0.672106	0.997189	-0.989367	0.959531	-0.853042	0.585739	-0.151927	0.892742	-0.473894	0.0261886	0.942073	-0.923592	0.880022	-0.944843	0.769463	-0.565612	-0.984387	0.989478	-0.705803	0.939003	0.907752
251	-0.0417438	-0.176883	-0.797824	0.711482	0.712517	0.457099	0.595659	0.95179		-0.921587	0.735141	-0.662391	-0.117113	-0.203835	-0.0996629	-0.56621	0.91295	-0.998905	-0.144085	0.776176	-0.405122	0.0734686	-0.438891	-0.739413	0.955041	-0.508692	-0.213102	0.0343777	0.907525	0.395507	-0.351661	-0.631514	0.490831	-0.101548	0.999876	0.902581	-0.0920446	-0.624695	0.996033	0.813615	0.335885	0.0336036	0.766298	0.843513	-0.215138	0.752012	-0.578899	-0.691629	-0.605815
252	-0.961759	-0.751996	0.404317	0.666998	-0.279974	-0.665479	-0.690278	-0.705308		0.650261	0.994709	0.922958	-0.644871	0.224358	0.0752012	0.503689	-0.998621	0.99588	-0.78634	0.00388598	0.0498455	0.869389	0.0760503	0.760054	0.141883	-0.994807	-0.267093	0.99698	0.0257058	0.90437	0.398071	0.409001	0.999632	0.327271	0.595323	-0.833989	0.0556203	0.305864	0.616509	-0.141421	0.244189	0.204609	-0.605884	0.715724	0.157338	-0.0283949	-0.405341	-0.852512	-0.26435
253	-0.423111	0.741634	0.332	0.843906	0.188735	0.0445191	0.576119	0.260853		0.0863937	-0.162145	0.118018	-0.422936	0.0332477	0.109589	0.56956	0.665234	-0.7978	0.299008	0.24881	0.261354	0.383645	0.926496	-0.324403	-0.0897119	-0.841361	0.833894	0.401768	-0.461651	0.622306	-0.349354	-0.163466	-0.990024	-0.851419	0.805246	0.67334	0.0152997	-0.975277	0.0179555	0.614625	0.149435	-0.277016	0.251882	-0.436381	0.0022388	0.968676	-0.246997	0.501878	0.737154
254	0.533684	-0.369156	0.0822207	0.288055	-0.905589	-0.117349	0.929837	-0.562405		-0.816067	-0.123559	-0.184144	-0.840983	0.0460856	-0.530711	0.82875	0.337226	0.749134	-0.473079	-0.826826	0.515743	-0.819232	0.38189	-0.896313	-0.0613981	-0.97512	-0.818413	0.993272	-0.999981	0.258834	-0.587367	-0.964066	0.999832	0.607779	-0.882872	0.25205	-0.619373	0.754939	0.833408	-0.0742283	-0.473758	0.295893	0.969029	0.540818	-0.989949	0.278357	-0.020631	0.81084	-0.338869
255	-0.691468	-0.340831	-0.987092	-0.141421	0.744265	0.23612	-0.941655	-0.817217		-0.735022	0.917478	-0.195693	-0.595958	-0.0791731	0.919942	0.914317	-0.898008	-0.975372	-0.734547	0.98402	-0.762653	0.970055	0.111354	0.970736	0.289686	-0.756562	-0.572945	0.449278	0.118213	-0.346942	-0.633679	0.885018	-0.926556	-0.446576	0.518229	0.548815	-0.891453	-0.365542	-0.343221	0.631173	0.464856	0.997676	-0.404457	-0.76095	-0.270746	0.117379	0.267813	-0.368048	-0.298735
256	-0.76913	0.126989	0.390819	0.587896	-0.502486	0.21029	-0.253982	0.877211		0.775666	-0.832955	0.460283	-0.997627	0.133961	-0.0192041	0.750837	-0.580552	0.876204	-0.114235	0.593928	-0.0117524	-0.747053	0.921056	0.523893	-0.979701	-0.995605	0.387979	0.642917	-0.74506	0.192862	-0.427189	0.528903	0.99434	-0.461541	0.93533	-0.83489	0.373139	-0.282046	0.181053	0.0321867	0.269696	-0.99723	0.174467	-0.330468	-1	-0.324931	-0.0475277	-0.707892	0
257	-0.817363	-0.988917	-0.841763	-0.782569	-0.511654	0.156064	0.915141	0.824042		-0.607732	0.344673	-0.189517	-0.998809	-0.111446	-0.329259	0.536372	-0.0394949	-0.909717	0.349382	-0.999316	-0.00235293	0.871196	-0.999298	-0.960931	0.952926	-0.995265	0.0270013	0.699236	-0.133757	0.417566	-0.811851	-0.999231	-0.735321	0.581238	-0.835278	-0.414434	0.0915987	-0.640184	0.570532	0.355486	-0.0513663	0.263755	-0.748567	0.0197423	0.102178	-0.0372875	-0.316612	0.813733	-0.344871
258	-0.345092	0.374789	-0.0189002	0.928537	0.85689	0.0104433	0.974859	-0.845807		0.408393	-0.322831	-0.132545	0.132937	-0.966585	-0.179045	0.233151	-0.0407824	0.684649	-0.127101	0.990892	-0.235771	-0.192824	0.953752	0.987154	0.660492	-0.817827	-0.953583	0.304616	-0.00541508	0.917021	-0.285835	-0.4641	-0.70114	-0.169582	-0.78253	-0.291459	-0.284854	-0.574426	0.976458	0.537006	-0.0350954	-0.383665	0.493847	0.899508	0.0382399	-0.867483	-0.407278	0.967578	-0.241604
259	0.946433	-0.767244	0.601435	0.708243	0.413362	-0.596833	-0.686787	-0.245374		0.908957	-0.854579	0.771094	-0.805956	0.107341	0.999641	0.980221	-0.586397	0.907959	-0.872949	-0.999994	-0.722642	0.987464	0.624695	-0.974629	0.704363	-0.999742	-0.22517	0.918299	0.999294	0.267309	-0.977479	0.991361	0.559942	0.22929	0.944407	-0.533148	-0.316228	0.0668292	0.483273	-0.667167	0.726468	0.822978	0.297753	0.713617	0.631991	0.668243	-0.571956	0.0376595	0.000637349
260	-0.378633	0.988555	0.00126103	0.91973	-0.963706	0.30583	0.435711	-0.951415		0.999218	-0.773218	0.39025	-0.327681	-0.558716	-0.543367	0.217564	0.962575	-0.8928	-0.739338	-0.810381	0.121461	-0.0545593	0.186189	0.766848	-0.141421	-0.219997	0.428179	0.118351	-0.892747	-0.398105	-0.762686	-0.581066	0.732823	0.947265	-0.969475	-0.999997	-0.957616	-0.607741	0.916788	0.23938	-0.718344	-0.540402	-0.29415	0.987895	-0.993753	0.231353	-0.647125	-0.314013	-0.499022
261	-0.567242	-0.014183	-0.29934	-0.620703	-0.744814	-0.266756	0.0639713	0.667734		-0.879095	0.996253	-0.815597	0.445727	-0.712984	0.374914	0.76266	-0.855338	0.999203	-0.675218	-0.968578	-0.467475	0.943275	0.999756	0.980625	-0.645631	-0.880228	-0.229236	0.979431	0.0869181	-0.199364	-0.594019	-0.968514	0.999409	-0.84313	0.898971	-0.363208	-0.198501	0.101906	0.208938	-0.30008	0.941565	0.979687	0.993282	-0.999765	0.178061	0.376469	-0.638226	0.638654	0.811953
262	-0.452987	0.543647	0.104233	0.785828	0.705939	-0.20437	0.58396	-0.947019		-0.533671	0.866315	-0.337756	-0.146349	-0.388827	-0.115099	0.819696	-0.743857	0.360399	-0.532899	0.835962	-0.25297	-0.336757	0.595595	-0.992865	0.957682	-0.998311	0.1026	0.965963	-0.533301	0.931446	-0.722344	0.929956	-0.931447	0.99801	-0.36549	0.018754	-0.445676	0.221944	0.00237529	-0.00310076	0.904972	-0.864109	0.298079	0.889839	0.15428	0.405596	-0.260316	-0.792949	-0.767107
263	-0.0383105	0.629327	-0.892301	0.130666	0.0021645	-0.182089	0.200824	-0.332078		-0.851944	-0.944695	0.841879	-0.481759	-0.455394	0.283253	0.710498	0.111119	-0.983571	-0.676021	-0.988911	0.333365	0.501355	0.987501	0.786178	-0.505085	-0.800372	0.421991	0.859553	0.924404	-0.328402	-0.724871	-0.99993	-0.992743	0.951899	-0.606026	0.171778	-0.808736	-0.0321096	-0.0197071	0.314189	-0.964379	-0.184616	-0.513798	-0.384245	-0.803039	-0.23061	-0.310499	0.89502	-0.996111
264	-0.994581	0.124791	-0.873364	-0.4108	-0.197141	0.709391	-0.853962	-0.510772		0.893526	0.268402	-0.842662	-0.525236	-0.507573	-0.395387	0.499909	0.995387	0.987495	0.562825	0.922077	0.21621	0.960732	0.798435	-0.922706	0.911347	-0.843459	0.179582	0.76684	0.964607	0.197169	-0.983968	-0.954778	0.999793	-0.998803	0.482595	-0.912426	-0.192745	-0.37412	-0.173538	0.164578	0.999474	0.489447	0.0839295	0.566133	-0.348442	-0.164513	-0.0599777	0.670913	0.0889073
265	0.08945	0.662209	0.134845	-0.547395	-0.0633006	-0.814143	0.0978613	-0.342529		-0.0480727	-0.555493	0.350989	-0.2237	-0.991421	-0.416426	-0.903565	-0.610683	-0.740769	-0.099001	-0.877842	-0.337446	-0.381675	-0.0284077	0.981395	-0.16126	-0.166858	-0.0668807	0.766092	-0.880421	-0.429814	-0.994809	0.999068	-0.406963	0.907871	-0.955809	0.231136	-0.879046	0.401477	0.971313	-0.429418	-0.821116	-0.435061	-0.17841	0.404388	-0.990988	-0.92011	-0.407375	-0.0540446	-0.125851
266	-0.519368	0.763062	-0.126244	0.11455	-0.384187	0.32684	-0.0875853	0.941613		0.563794	0.317971	-0.207743	-0.656021	-0.277846	0.139962	0.347481	-0.553358	-0.376278	-0.643759	0.0899068	-0.0590044	0.256821	0.664592	-0.313868	-0.205527	-0.754473	-0.112297	0.526979	-0.199711	0.769972	-0.209132	-0.810095	0.620342	0.89796	-0.429033	-0.180782	-0.211903	-0.798844	0.26988	-0.999985	0.0268534	-0.867591	-0.851268	-0.424764	-0.0513545	0.205407	-0.306537	-0.586846	-0.159421
267	0.265975	-0.757872	0.304943	0.596703	-0.999849	-0.129672	-0.723975	-0.587615		0.84689	0.434299	0.317389	-0.0520269	-0.949846	0.309246	0.470588	0.355123	0.685419	0.212533	0.951709	0.140104	0.178069	0.781353	-0.8749	0.500403	-0.19606	0.295647	0.498038	-0.823792	-0.388528	0.174481	0.77761	-0.985018	-0.158197	-0.91629	-0.531925	0.167975	-0.0138875	0.338329	-0.607639	-0.285401	0.999535	0.29486	0.447214	0.339204	0.999995	0.163068	-0.0411772	0.569103
268	0.476927	0.801228	-0.0156419	-0.134613	0.981826	0.016353	-0.552608	-0.302362		-0.827598	-0.955518	-0.488636	-0.695564	-0.470914	-0.215714	0.545897	0.253983	-0.9274	-0.838648	-0.981496	-0.665521	0.0834773	-0.413975	0.990137	-0.832281	-0.0528526	-0.85833	0.832481	0.875011	-0.0310731	-0.837132	-0.99658	0.952264	0.158714	-0.582306	0.356651	-0.441013	0.550842	0.555892	0.852967	-0.391141	-0.422206	0.474649	0.420887	-0.445614	0.118539	-0.113161	0.682134	-0.979236
269	0.669666	0.034344	0.282791	0.207152	0.816362	0.489555	0.44431	-0.601955		-0.858932	0.54943	0.730175	-0.239513	-0.863537	0.217365	0.929319	-0.308505	0.890091	-0.894014	0.998319	0.947613	0.374126	0.972462	-0.668008	0.0167201	-0.211722	0.617994	0.941006	-0.679897	-0.206687	-0.480065	0.998178	0.877092	0.934589	-0.906576	-0.991573	0.250443	0.872071	0.805521	-0.684596	0.65237	-0.255101	0.284682	0.835209	-0.479849	0.0456255	0.21243	-0.957276	0.304296
270	-0.264772	0.472639	-0.745991	0.412047	-0.289811	-0.99164	-0.101765	-0.560948		0.890751	-0.979944	-0.765163	-0.545794	-0.462507	-0.958758	0.874908	0.975529	-0.500074	-0.796131	-0.667637	-0.725464	0.856896	0.195102	0.974268	0.439713	-0.920805	-0.647521	-0.120331	-0.994944	-0.64416	-0.911681	-0.907042	-0.928649	-0.169214	-0.999827	0.970268	-0.84771	0.98005	0.855623	-0.859161	-0.0750231	0.589172	-0.415133	0.502517	0.22723	0.597011	-0.205746	0.828099	-0.698382
271	0.276662	-0.44187	-0.0759224	0.496876	0.470639	0.074853	-0.331849	-0.0802006		-0.488005	0.359287	0.112025	-0.820127	-0.361638	0.75918	0.361813	-0.87546	-0.700046	-0.660071	-0.965693	0.10334	-0.393828	0.505802	-0.580376	-0.67994	-0.970407	0.0798106	0.82346	-0.920772	0.800555	-0.549321	0.520643	-0.869633	0.515932	-0.940003	-0.742832	0.134109	0.999973	0.430993	-0.999305	-0.0955133	-0.723617	-0.754776	-0.356495	0.723018	-0.33064	-0.0472685	0.776393	0.0622991
272	0.138373	-0.436453	0.198614	0.999948	-0.287456	0.678597	0.035306	0.927807		0.0685587	-0.522562	0.434266	0.190022	-0.70829	-0.87467	0.456025	-0.825143	-0.331811	-0.255504	-0.480862	0.0796548	0.391667	0.369569	0.00230946	0.54846	-0.282279	0.284165	0.353915	0.99335	-0.52472	-0.0964392	-0.625652	0.990158	0.698213	-0.50422	-0.678539	-0.459354	0	0.957586	-0.859192	0.221097	0.250269	0.936329	0.812794	0.842395	0.940156	0.987763	-0.309086	0.996701
273	0.315623	-0.649699	-0.341743	0.660673	-0.638622	-0.220962	0.78302	-0.873799		0.953514	0.395756	-0.474707	0.211549	-0.600996	0.138757	0.293637	0.642364	-0.319127	-0.874157	-0.211357	0.0747899	0.854417	0.685832	-0.773142	0.0706712	-0.613941	0.835559	0.65088	-0.262845	0.262188	-0.406008	0.349226	0.508206	-0.0149485	-0.988673	-0.339406	-0.498144	-0.135408	0.666386	0.984883	0.270204	0.0749763	0.37626	0.181507	-0.880577	0.988551	0.113518	0.690476	-0.4614
274	0.987628	0.0738162	-0.95445	0.842562	0.980389	0.161755	-0.281346	-0.559902		-0.847709	-0.398678	-0.901968	-0.483796	-0.362769	-0.0351688	0.160873	-0.657355	0.163888	-0.423185	-0.988552	-0.553474	-0.413347	0.3287	0.877814	-0.737501	-0.927003	-0.341358	-0.174086	-0.712783	0.159017	-0.770884	0.71156	-0.630514	0.436274	-0.984428	-0.696892	-0.282308	-0.457627	0.106612	-0.935976	0.978216	-0.926542	-0.675955	0.0485277	-0.828861	0.0903624	0.929293	0.719863	-0.213917
275	0.306941	0.817692	0.987525	0.99314	-0.553669	-0.150486	-0.849285	0.675684		-0.771434	0.969728	0.358979	0.663838	-0.155306	-0.322503	0.944455	0.875667	-0.743216	-0.913464	-0.997179	0.657913	0.998135	0.714177	-0.988422	0.66677	-0.746223	-0.00404462	0.949205	0.36732	0.98184	-0.397042	-0.903212	0.823258	0.967106	0.661373	-0.905459	-0.499722	0.0932593	0.512843	-0.946361	-0.787978	0.78607	-0.138829	0.42361	0.679642	0.999453	0.977176	-0.671164	0.331863
276	0.490394	-0.0775047	-0.687153	0.998821	0.667673	-0.999504	-0.783926	-0.751235		-0.84419	0.147456	0.87209	0.898904	-0.259676	0.218472	-0.729972	-0.949689	-0.167032	-0.920259	0.983382	-0.694195	0.94589	0.996378	0.996328	-0.260379	-0.997844	-0.502794	0.883406	0.733708	-0.18357	0.169444	0.936161	-0.566445	-0.309917	-0.9989	-0.459766	0.316228	-0.0428839	0.983365	0.685816	-0.909199	-0.550559	-0.533138	0.455207	-0.335164	0.771392	0.546606	0.735686	-0.450694
277	0.866345	0.279099	-0.995152	0.717436	0.00727253	0.338284	0.755348	0.424639	0	0.970712	-0.312451	0.410233	0.398932	-0.17143	0.624695	0.828569	-0.957057	0.935569	-0.925399	-0.974429	0.884322	0.653811	0.63944	-0.998481	-0.308539	-0.807791	-0.825101	-0.522126	0.71451	-0.272766	-0.462067	-0.967086	-0.881222	0.631992	-0.898638	-0.498933	-0.0589038	0.0692643	0.335768	-0.939176	0.911062	-0.159013	-0.056447	0.280647	-0.953231	0.141348	-0.0566254	-0.215161	-0.690476
278	-0.0380007	0.620208	0.490515	0.873825	0.209019	-0.12098	-0.237228	0.977638	0	-0.483308	0.374592	-0.504989	0.596226	-0.205794	0.0179254	0.118487	0.999604	0.482283	-0.989903	-0.736645	0.386727	0.0134088	0.944497	0.105137	-0.473604	-0.519058	-0.802204	0.202499	-0.481769	0.993619	-0.906868	0.542462	0.26957	-0.825739	-0.899453	-0.223738	-0.0599091	-0.960051	-0.332431	-0.368692	-0.281127	0.704542	0.411462	0.892138	-0.755244	0.270357	0.0545852	0.400615	0.0963242
279	-0.957526	-0.787691	0.716422	0.283094	-0.597799	0.456758	-0.871421	-0.848261		0.981278	0.764646	0.263763	0.90217	0.305182	0.0876806	0.518438	-0.950113	0.148561	-0.971009	0.932057	-0.625708	-0.559347	0.540682	-0.909942	0.869241	-0.935617	0.252897	0.99943	0.775562	-0.352746	0.128102	0.141755	-0.809127	0.477196	-0.944396	-0.217431	-0.620994	0.16205	0.430316	-0.4665	0.888469	-0.957253	-0.947311	0.885957	0.796487	0.93533	-0.0617377	-0.0250339	0.412308
280	0.999433	0.0868591	-0.195372	0.582402	0.561501	-0.0758867	-0.475796	0.134474		-0.74128	-0.557098	0.52694	0.678307	0.552097	0.111657	0.729162	-0.924518	0.967292	-0.992892	-0.932623	0.416254	0.207963	0.999894	0.9977	0.0392368	-0.751801	0.664967	0.627248	-0.804075	-0.619949	-0.357569	-0.425123	0.866111	0.853049	-0.905109	0.424841	-0.447775	-0.367217	-0.0914032	-0.418638	-0.815683	0.28907	0.437152	0.459423	-0.838892	0.012224	-0.386923	-0.456334	0.945039
281	0.243354	-0.300693	-0.66234	0.322781	-0.972857	0.377297	-0.564119	-0.116139		-0.744433	0.356702	-0.0465815	0.741262	0.259193	0.988877	0.950605	-0.998437	-0.998107	-0.974391	-0.870445	0.0613596	-0.904697	0.323553	-0.967617	0.93566	-0.99361	0.949446	0.357248	0.986112	0.263712	-0.9981	0.88515	-0.812498	0.965737	-0.96409	-0.959215	0.173168	0.437969	-0.354011	-0.864974	0.858568	-0.508872	0.324174	0.898505	-0.684476	0.816225	-0.409782	0.435652	-0.989002
282	-0.993151	0.50738	-0.964404	-0.173561	0.0692592	0.0836474	-0.332552	-0.398539		-0.671099	-0.843719	-0.880938	0.945233	0.582171	-0.883788	0.876471	0.244225	0.875902	-0.916548	-0.993961	-0.523263	-0.996795	0.934784	-0.549894	-0.990342	-0.52869	-0.0611959	-0.5547	-0.999898	-0.0717778	-0.959115	-0.853534	0.895963	0.551478	-0.822899	0.914167	-0.786413	-0.876882	0.0977264	0.939916	-0.870694	-0.43	-0.272374	0.0488981	0.22486	-0.195286	-0.446001	-0.792755	-0.989798
283	-0.555887	0.0501651	0.263294	-0.150581	-0.0439826	0.0382603	-0.405993	0.543423		0.660812	0.0311375	0.787282	0.980221	-0.106743	0.055712	0.963159	-0.44855	-0.639768	-0.888244	0.88128	0.0872943	0.229513	0.991325	-0.924148	0.147532	-0.520499	0.0164994	0.511339	0.695529	-0.980802	-0.248217	-0.673884	0.78848	0.621323	-0.999745	-0.161067	-0.319686	0.897154	0.406356	-0.0375162	0.674628	0.144077	0.209087	0.999306	-0.552417	0.386701	-0.372168	-0.16525	0.970143
284	-0.239968	-0.0705101	0.42328	-0.847346	0.145839	-0.374636	-0.440713	0.370737		-0.99681	-0.0220535	0.218783	0.643055	0.452219	-0.0106718	0.882657	-0.135545	0.474524	-0.98584	-0.937734	-0.204523	-0.803604	-0.326219	0.687876	-0.462311	-0.742919	-0.274909	0.56921	-0.565127	1	-0.810549	-0.56248	-0.996546	0.879137	-0.995255	-0.108143	0.347877	-0.964067	-0.675403	-0.697899	-0.801497	-0.298021	-0.445154	0.92776	0.0302129	-0.542942	-0.309627	0.655369	0.697238
285	0.220227	0.203023	-0.51839	-0.902694	0.482943	0.0530473	-0.085847	0.239714		0.999928	0.722911	0.64372	0.586775	-0.064851	-0.331388	0.230675	-0.226912	-0.035213	-0.850481	0.792695	0.12523	-0.745674	0.992215	0.181733	0.241027	-0.529797	0.298991	-0.204033	-0.9603	0.333685	-0.310001	-0.39901	-0.754369	-0.0296091	-0.999946	0.167605	0.0930063	-0.853968	0.074355	0.646175	0.147888	0.0380347	-0.0247672	0.887412	-0.907427	-0.00587074	-0.326066	0.551117	-0.238757
286	0.870172	0.309854	0.783616	-0.982423	0.314565	0.736617	-0.515377	-0.27933		-0.0865287	-0.497401	-0.716527	0.651401	0.94246	0.945705	0.99566	-0.33282	-0.969473	-0.704369	-0.956982	-0.739196	0.388825	0.99092	0.974723	0.986201	-0.862893	0.627203	0.996161	0.955873	-0.75564	-0.738142	0.992414	-0.219839	0.603612	-0.854914	-0.990639	0.142974	-0.86446	0.760962	-0.200785	0.995562	0.415594	0.974637	0.957211	-0.931412	0.0940212	0.238878	-0.836177	0.746709
287	-0.0310353	0.422112	0.0517863	-0.511184	-0.918117	0.0670598	-0.189463	0.997903		-0.0631269	0.018807	-0.0866782	0.495647	0.158014	0.0383504	-0.0743835	0.623329	0.242901	-0.981788	0.262244	0.147426	0.284743	0.102488	-0.172092	-0.125698	-0.984147	0.0482152	0.0295586	-0.125194	-0.766285	-0.0640119	-0.734274	0.62539	0.807244	-0.4809	-0.113517	-0.114295	-0.471377	-0.00840306	-0.799394	-0.0585314	-0.0393867	-0.0852008	0.274852	0.999985	-0.0943864	-0.965808	0.991502	-0.87138
288	-0.622039	0.708753	-0.357675	-0.977527	0.995277	-0.285141	-0.562902	-0.754047		-0.608589	0.855584	0.50167	0.609084	0.973246	-0.390752	0.44372	-0.998213	0.655132	-0.823777	0.926487	-0.0160671	-0.378097	0.999999	-0.983416	0.509212	-0.522898	-0.293811	0.964795	0.169356	0.284519	-0.362375	0.867625	-0.317229	0.913976	-0.972712	0.53548	0.132316	-0.0163022	0.477772	-0.891991	-0.884242	-0.621807	-0.914849	0.108259	-0.916053	-0.107482	-0.504163	-0.928678	-0.759767
289	0.319846	0.956958	-0.474933	-0.372392	-0.711893	0.517931	0.987241	-0.990105		0.945661	0.718988	0.935962	0.76274	0.656179	0.906871	0.697191	-0.489743	-0.0803516	-0.575869	-0.989913	0.557635	-0.401276	0.994949	0.702318	-0.63869	-0.361392	0.335717	-0.737154	-0.0313571	0.476478	0.238623	0.847042	-0.970143	-0.628473	0.240293	0.583247	-0.372591	-0.972224	-0.681546	-0.775755	0.793891	0.50702	0.300388	0.880509	0.00560739	0.762371	-0.126546	-0.902762	0.890653
290	-0.292846	-0.331532	0.422752	-0.560393	0.999978	-0.236845	-0.998874	0.99564		-0.847837	-0.99895	0.976659	0.338719	0.848628	-0.0115466	0.532951	0.275525	-0.829417	-0.672951	0.895864	-0.998505	0.732426	0.956563	0.99729	0.335489	-0.293387	-0.602026	-0.782929	-0.63902	-0.355811	-0.354304	0.955997	0.905658	0.789212	-0.417709	-0.945612	-0.832642	-0.431929	0.152248	-0.345489	0.945816	-0.566672	-0.132502	0.758975	-0.846571	-0.756423	-0.200659	0.660045	-0.996519
291	-0.243675	-0.468794	0.844391	-0.162742	-0.72789	0.0867587	0.79706	-0.208898		0.735498	0.871828	-0.698918	0.717731	0.896936	-0.910151	0.999048	-0.820552	0.998009	-0.242038	-0.609124	0.606914	-0.152989	0.99795	-0.0945303	-0.932603	-0.0458455	0.503224	0.924223	-0.989155	-0.917103	0	-0.930569	0.35034	-0.321525	0.981251	-0.267644	0.619471	-0.616168	-0.221363	-0.471075	-0.72212	0.221621	-0.237542	0.527616	-0.589858	0.985743	-0.0347671	0.791257	-0.566357
292	-0.628337	0.674975	-0.951808	0.387707	-0.489142	-0.55611	-0.844282	0.971864		0.763851	-0.84237	0.767444	0.0509331	0.753287	0.974035	0.311726	0.63408	-0.967075	-0.245111	-0.959678	-0.613941	0.974732	0.488465	-0.949673	0.324839	-0.109457	-0.116841	-0.412682	0.971336	-0.487461	-0.965953	-0.996906	0.906651	0.473127	0.959324	0.158907	-0.762509	-0.246863	-0.999963	-0.368654	0.199037	-0.941742	-0.171008	0.920287	-0.890293	-0.855422	-0.168079	-0.396934	-0.710809
293	-0.710858	0.437693	0.564882	0.599198	0.991578	0.710939	-0.857493	0.60555		-0.425158	0.0102036	0.228567	0.432555	0.868919	-0.21803	0.509041	-0.652643	-0.854661	-0.6	0.970048	-0.828421	0.999985	0.707107	0.999169	-0.657777	0.591667	-0.963643	0.61908	0.207081	-0.664441	-0.988829	0.992386	0.897268	0.676194	-0.686453	-0.331011	0.0161269	-0.927467	0.76204	-0.978565	-0.517638	0.8327	0.905882	-0.548112	-0.983787	0.935985	-0.687311	0.693794	0.994155
294	-0.313724	-0.370061	0.519947	0.196003	-0.970549	0.0559124	0.106117	0.987742		-0.0256326	-0.880956	0.960068	-0.810029	0.859196	-0.965992	0.794187	0.999342	-0.514496	0.863239	0.968084	-0.782646	0.291446	-0.601123	-0.996535	0.863436	0.3882	0.973973	-0.0589987	-0.412198	0.777409	-0.647482	-0.790916	-0.961757	0.930341	0.992521	-0.335702	0.458186	0	-0.899981	0.963111	0.728848	-0.403191	-0.472576	0.911424	-0.961369	0.316228	-0.452102	-0.27004	-0.531899
295	-0.993389	0.146645	-0.722261	-0.00140056	0.497467	0.0173134	-0.9562	-0.90849		-0.826187	0.532608	-0.969279	-0.586783	0.378102	0.657658	0.719659	-0.998081	-0.744007	-0.0233581	-0.963735	-0.0732125	-0.624219	-0.868622	0.994955	-0.735641	0.350941	0.570396	0.49372	-0.950461	-0.89409	-0.971889	0.984525	0.940015	0.455381	-0.464357	-0.803816	-0.999343	-0.231465	-0.574119	-0.101574	0.154639	0.303018	0.776054	-0.815097	-0.917556	0.849321	-0.474428	-0.988279	0.200851
296	-0.903625	0.452865	-0.667481	0.0979472	0.975237	0.101273	-0.952776	0.698622		0.931039	-0.787539	0.975416	-0.16249	0.859855	0.886318	0.883224	-0.999997	0.963142	-0.320675	-0.922158	0.115421	0.84051	0.0865846	-0.940902	-0.320105	0.879251	-0.702742	0.97599	0.801618	0.93724	0.18322	-0.92994	-0.960182	0.331039	0.957844	0.517229	0.912868	0.430495	0.453307	-0.995037	0.961257	-0.999989	-0.493293	0.00484647	-0.957284	0.977377	-0.690613	0.878029	-0.760834
297	-0.861006	0.601225	0.957632	-0.844285	-0.886786	-0.454133	-0.181273	0.251857		-0.808054	0.439765	-0.94519	-0.130767	0.0970557	0.953009	-0.348419	0.846499	-0.938948	0.260313	0.939523	-0.788377	-0.949053	-0.332919	0.930612	0.90569	0.774275	-0.444039	-0.536647	-0.515354	-0.84526	-0.844486	0.801592	0.92213	0.181547	0.856736	0.304492	-0.87306	-0.0991189	-0.282442	0.67054	-0.028492	-0.609465	0.268341	-0.961894	-0.434647	-0.448741	-0.477321	-0.0873397	-0.893348
298	-0.866233	0.311253	-0.993703	0.745656	-0.935736	0.545574	-0.731685	0.28398		-0.98114	0.992095	0.828589	-0.388793	0.0382373	-0.395624	0.433222	0.20556	0.219999	0.987278	-0.995991	-0.987255	-0.861468	-0.419851	0.230662	-0.986394	0.693164	-0.143818	0.570105	-0.206241	0.999614	-0.883762	-0.994642	-0.806046	0.694916	0.724999	-0.530644	-0.327366	0.349961	0.131165	0.0150795	-0.754648	0.425243	0.370144	0.567223	0.235185	0.52203	-0.548369	0.740219	0.818266
299	-0.355929	-0.989598	0.456018	-0.465176	-0.558853	-0.398569	-0.213286	0.716661		0.981498	0.660804	-0.00714267	-0.469849	0.512524	0.223825	-0.675254	-0.846691	-0.295741	0.999538	0.182169	-0.00204359	-0.188141	-0.99705	-0.866219	0.578508	0.406355	-0.233459	-0.957013	-0.797755	-0.999877	-0.134657	0.5955	0.828573	0.965132	0.955896	0.68176	-0.26286	-0.829024	0.946752	-0.251901	-0.450188	-0.0270172	-0.154323	0.409683	-0.772703	0.305596	-0.80975	-0.975519	-0.999808
300	-0.885525	0.294722	-0.571288	-0.924036	0.827033	-0.015871	-0.505547	-0.571793		0.623077	-0.774413	0.303774	-0.408366	0.41436	0.0802006	-0.191355	-0.999875	0.660009	0.931922	-0.955949	-0.734432	-0.780485	-0.405174	0.847293	-0.984592	0.999994	0.711983	0.892144	0.0568555	-0.152463	-0.450455	0.357793	-0.782296	0.561438	0.817095	0.367659	-0.287471	-0.678123	-0.68384	0.306009	0.222137	-0.654955	0.930408	0.977073	-0.619527	-0.366361	-0.537677	-0.345982	-0.737787
301	-0.936225	-0.0698871	0.337513	-0.721005	0.42387	-0.779929	-0.999816	0.708825		0.730545	0.564167	0.985212	-0.787872	0.949849	-0.7443	-0.0473606	-0.0253725	-0.802793	-0.483328	-0.949182	-0.710514	-0.0131799	-0.982231	0.890262	0.5547	0.89202	-0.93867	0.990405	-0.997421	-0.640885	-0.845048	-0.922681	0.0734125	0.381775	0.934662	-0.871903	0.857493	-0.989259	0.331387	-0.982321	-0.108916	-0.0454813	0.0125147	0.25305	-0.338881	-0.423656	-0.628247	-0.604927	0.209529
302	-0.990683	0.811979	0.781194	-0.955595	-0.432501	0.621231	0.869903	0.656953		0.273254	0.288639	-0.327801	0.232522	0.879771	0.442174	-0.103131	0.976447	0.961398	-0.240816	-0.872015	0.475536	-0.337201	-0.774421	-0.765134	-0.297516	0.58033	0.288639	-0.682046	0.990007	-0.760413	-0.881822	0.996358	0.804959	0.536952	0.83026	0.458802	-0.865647	-0.896301	-0.309728	-0.942134	-0.768455	0.773645	-0.34742	0.897948	-0.503871	0.689342	-0.71354	0.6079	0.936736
303	-0.0593946	-0.837024	0.0458455	-0.364772	0.812324	-0.234247	-0.472146	-0.426164		-0.386244	0.921778	0.616809	-0.271908	0.855905	-0.22741	0.332978	0.462459	-0.847401	0.153129	0.549154	0.108059	-0.585505	-0.999264	-0.0417826	-0.735356	0.600333	-0.116581	-0.127753	-0.184777	0.0354683	-0.552975	0.0317566	-0.72319	0.820488	-0.684387	-0.247992	-0.174055	-0.985212	0.309236	-0.787631	0.994656	-0.380055	0.233177	0.374715	0.101527	0.965978	-0.475571	0.15893	-0.524938
304	-0.660763	0.997171	-0.451069	-0.995428	-0.156221	0.559247	-0.674532	0.999646		-0.993255	0.984332	-0.903366	0.339137	0.955473	-0.502774	0.719509	-0.999489	0.999553	-0.735747	0.928692	0.327111	-0.677734	-0.998215	0.969397	0.932023	0.11872	-0.652242	0.981595	-0.970745	-0.644046	-0.347203	-0.911756	0.353057	-0.800718	0.300129	-0.818217	-0.917857	-0.983408	-0.746917	0.247216	-0.865589	0.985521	0.119781	0.368961	0.416311	-0.635583	-0.464423	-0.990761	-0.987927
305	-0.877536	-0.6238	0.344495	-0.873842	-0.581901	-0.0730715	-0.600525	-0.557603		0.836048	-0.622163	-0.151809	0.086689	0.990894	0.174264	0.178961	-0.0619497	-0.857422	-0.495203	-0.777912	-0.447214	-0.571577	-0.410126	0.499524	-0.654501	0.418203	0.138106	-0.700895	-0.659493	0.149538	-0.524921	0.871191	0.352322	0.297276	0.802322	0.599078	0.69238	-0.11672	0.244839	-0.971346	-0.852791	0.861246	0.338367	-0.21068	-0.916444	0.732547	-0.737636	0.800756	0.877936
306	-0.0231419	0.513757	-0.916157	-0.998074	0.605522	0.377382	0.845053	0.932981		-0.572517	0.749916	0.993822	-0.124529	0.89994	0.295073	0.478063	-0.804468	0.74935	0.589934	-0.967642	0.561538	-0.441252	-0.873114	0.166302	-0.712763	0.560261	0.364399	-0.686916	-0.993011	-0.732793	-0.763386	-0.983435	0.773516	-0.739158	-0.844155	-0.850105	-0.997376	-0.99572	0.473933	-0.788557	0.653029	-0.096766	-0.121891	-0.0667553	0.752124	-0.999109	-0.0566147	0.869503	-0.239044
307	-0.925991	0.700765	0.75741	-0.984484	-0.779765	0.0899351	0.0270734	0.436709		0.841634	0.990446	0.497627	-0.214477	0.936179	0.740058	0.999207	0.542951	0.973616	0.705054	0.928518	-0.851249	-0.578282	0.313531	0.963081	-0.702331	0.272672	0.882499	0.993134	0.854671	-0.584747	-0.97363	0.987842	-0.876376	-0.513311	0.999606	-0.732407	-0.297477	-0.846069	-0.553562	0.928339	0.619813	0.268458	-0.918773	0.220826	0.071247	0.563744	-0.517445	0.132908	0.335765
308	0.0830455	-0.690165	-0.966181	-0.652426	0.17683	-0.230025	-0.751759	-0.931307	0	-0.977728	-0.414827	-0.596159	-0.561729	0.99884	-0.34111	-0.283815	-0.882578	-0.826486	0.418857	-0.775793	-0.207033	-0.568903	0.314951	0.993056	0.938611	0.221661	-0.577535	-0.363417	-0.789727	0.2283	-0.360256	-0.681585	0.794424	0.276594	0.700938	0.721614	-0.907853	-0.257194	0.578747	0.427318	-0.141822	-0.126815	0.091957	-0.997351	-0.212649	-0.955651	-0.971951	-0.608169	-0.921736
309	-0.929991	-0.976332	0.617822	-0.922804	0.67434	-0.666465	0.798444	-0.468318		0.988391	0.238052	0.869457	-0.402703	0.892413	0.2356	0.501718	0.900271	0.954697	0.975148	0.913551	-0.802043	-0.725849	-0.308177	-0.993781	-0.97986	0.970143	0.0304207	-0.446793	0.958136	-0.715593	-0.646673	-0.804656	-0.850265	0.595077	-0.279074	-0.468907	0.540673	-0.839532	0.118367	0.999988	-0.407266	0.389095	-0.628272	0.960514	-0.544069	0.60293	-0.981806	-0.000890472	0.366525
310	-0.652751	0.705291	-0.0577393	-0.684204	-0.506085	0.539518	-0.955082	-0.790724	0	-0.98264	-0.980686	-0.684496	-0.841645	0.808015	-0.352581	0.861808	-0.993119	-0.977973	0.290502	-0.977119	-0.693401	-0.713671	0.923461	-0.96498	-0.809247	0.213697	-0.959366	0.854084	-0.948925	-0.935401	-0.951317	0.13791	0.359241	0.714166	0.976453	-0.616764	0.878417	-0.127825	-0.490261	0.692095	0.61005	-0.651629	0.0702486	-0.947772	0.359227	-0.826115	-0.899147	0.567925	-0.154128
311	-0.99618	0.0247177	-0.168735	-0.308921	-0.413188	-0.238222	-0.963607	-0.739708		0.976746	-0.818912	0.480722	-0.813938	0.945807	0.507929	0.826702	-0.996357	-0.550541	0.904578	0.956138	-0.795801	-0.735402	0.564847	-0.900664	0.571649	-0.175879	0.674597	-0.782457	-0.702179	0.411062	-0.719701	-0.630249	0.907074	0.271645	-0.926467	0.968952	-0.810809	0.158377	-0.362446	0.480062	-0.661885	0.60708	0.919145	0.0079183	0.371391	-0.515081	-0.960292	0.496139	-0.995409
312	-0.307348	0.197369	0.51704	-0.27335	0.715803	-0.445204	-0.747634	-0.155185		0.086011	0.980779	0.578499	-0.662216	0.595059	-0.952183	0.975964	-0.787464	-0.870674	0.835174	-0.935295	-0.717525	-0.424963	0.842271	0.993017	-0.99867	0.868864	-0.605405	-0.517519	-0.963375	-0.971732	-0.0190937	0.623214	-0.697242	0.473127	-0.62298	-0.89001	0.38075	-0.00166666	0.720727	-0.340511	-0.300771	-0.708171	-0.285541	-0.634317	0.0093236	-0.578167	-0.722133	-0.993753	0.93614
313	-0.731843	0.142033	-0.260429	-0.627075	0.991403	0.113838	-0.653583	-0.00142857	0	-0.840075	0.782911	-0.348352	-0.995893	0.832233	0.618754	-0.664772	0.906721	0.938576	0.847749	0.0518171	0.0231726	0.164399	0.995288	0.654001	-0.523326	0.57463	-0.192474	-0.956298	-0.824427	0.953994	-0.694237	-0.882024	-0.223268	0.00952338	0.94474	-0.0678478	-0.238453	-0.143594	-0.173281	0.302298	0.434017	0.997944	-0.0496768	0.791836	-0.498752	-0.644136	-0.95096	0.803928	-0.973044
314	-0.533747	0.894427	-0.618284	-0.476516	-0.763886	0.593076	0.856247	-0.618057	0	-0.692969	-0.176986	0.139705	0.993496	0.50717	0.875162	-0.107651	-0.482035	0.156768	0.817954	-0.978468	-0.16161	-0.275825	0.826592	0.726532	0.0416305	0.792746	0.0388057	0.710059	-0.980669	-0.929019	0.772347	0.739216	-0.646007	0.988885	-0.420299	0.4749	-0.116632	-0.437209	0.821202	-0.968032	-0.323029	-0.674536	0.971339	-0.675387	0.917548	0.42804	0.633238	0.0251493	0.405805
315	-0.853996	0.582754	0.755381	-0.26372	0.119145	-0.289542	-0.962022	-0.605807		0.101617	0.622834	0.580624	-0.749441	0.59493	0.0430866	0.0713739	-0.827812	-0.97347	0.982499	0.194248	-0.420947	0.305986	0.708188	-0.821184	0.967133	0.998706	0.292907	-0.0376735	0.884312	-0.524989	0.04877	-0.981796	0.999006	-0.949501	-0.371033	-0.195807	0.232213	-0.520865	-0.649575	0.0998399	-0.634272	0.842551	-0.947474	0.967784	0.660379	-0.0326319	-0.338681	-0.990699	0.00755646
316	-0.650907	-0.955202	-0.5993	-0.959176	0.0910409	0.781294	0.674014	-0.0446708	0	0.931861	-0.373611	-0.0916131	-0.00913204	0.53618	0.116636	-0.532152	-0.97304	0.697642	0.88872	-0.987931	-0.649486	0.0627949	0.932405	-0.985934	-0.993377	0.823741	0.180652	0.274721	-0.999826	0.977722	-0.311512	0.58007	-0.557219	0.893518	-0.448678	0.861042	0.604984	-0.170103	-0.117784	0.465074	0.925437	0.179027	0.180207	-0.718311	-0.458363	0.891065	0.831084	-0.196375	-0.899921
317	-0.209631	0.678714	-0.381565	-0.830178	-0.771685	-0.145921	-0.725374	0.0465182		-0.999717	0.765362	0.0778877	0.00694428	0.827861	-0.408868	-0.478303	-0.568682	-0.832358	0.830787	0.687859	-0.4228	0.600053	0.640461	0.964331	0.0785069	0.296957	-0.570926	0.196116	0.622622	-0.715441	-0.44299	0.820548	-0.998936	0.888698	0.473142	-0.73288	-0.995199	-0.707107	-0.141767	0.217861	-0.288392	-0.64838	0.0479316	0.137081	-0.122954	-0.920915	-0.878442	0.981287	0.561883
318	-0.36341	-0.117219	0.373815	-0.181186	-0.283628	-0.522477	-0.812868	-0.88199	0	-0.876424	-0.298202	-0.914561	0.858643	0.582711	-0.09823	-0.0426251	0.0553045	-0.532694	1	0.70516	-0.663624	0.799351	0.70324	-0.983494	-0.931082	0.00326369	0.324267	0.90954	0.314007	0.170917	-0.999896	-0.974965	0.974416	-0.719717	0.983485	0.24042	0.205088	-0.432954	0.232275	0.625717	0.954884	0.301971	0.373303	-0.440959	0.997356	-0.190245	0.420389	-0.755819	0.0695136
319	-0.97711	0.71434	-0.90461	-0.99171	0.316228	0.543251	-0.99421	-0.322334	0	-0.845853	-0.385864	0.867069	0.756535	-0.00784803	-0.0797452	0.161898	-0.896587	-0.928068	0.998285	-0.996942	-0.701316	0.567961	0.645942	0.314235	-0.812858	-0.0524465	-0.267104	-0.574318	-0.9809	-0.886218	-0.527	0.917211	-0.866622	0.435182	-0.514078	-0.105268	-0.827612	-0.306917	-0.472993	0.516665	-0.455802	0.0413724	-0.990504	0.934925	-0.670136	0.00300751	0.784961	-0.180898	-0.959256
320	-0.558126	-0.94241	-0.0345189	-0.508661	0.932725	-0.346007	0.569348	-0.220137	0	0.559255	0.146618	-0.634243	0.581322	0.693937	-0.0581704	0.59072	-0.967646	-0.347179	0.976743	0.986424	0.0224265	0.31915	0.577183	0.742276	0.03051	-0.351501	0.0109084	-0.897303	0.783888	0.338427	0.0570498	-0.792002	0.406424	-0.407627	0.83639	-0.577565	-0.841942	-0.0598923	-0.142578	-0.106763	0.254393	0.208206	-0.0365609	-0.198171	0.813977	0.169665	0.822001	-0.163339	0.707107
321	-0.991357	-0.40278	-0.687977	-0.789211	-0.954024	0.966171	0.639579	-0.662035		0.185764	0.859261	0.676261	0.84787	0.135619	-0.591735	-0.335851	0.975991	0.881913	0.997549	-0.606071	-0.986005	0.143748	0.998346	-0.788603	-0.198662	-0.385492	0.453457	0.397472	-0.783968	0.767927	-0.310057	-0.942521	0.999538	-0.550313	0.999569	0.999215	0.929638	-0.990316	0.0728914	0.0932475	-0.874054	0.548402	0.844047	0.878778	0.981039	0.942785	0.705547	0.80296	-0.950966
322	-0.478711	-0.515954	0.799068	-0.960799	0.607015	0.697488	-0.923446	-0.756381		-0.973832	0.989683	0.403766	0.998564	-0.341743	0.958798	0.580657	-0.935353	-0.935301	0.999874	0.908921	0.998688	0.128236	0.472553	0.944441	0.145416	-0.148018	-0.701927	0.608077	-0.973751	-0.429335	-0.247598	0.858947	-0.994002	0.89983	0.999976	-0.230938	-0.885215	0.94611	-0.614595	0.592237	0.756423	0.499663	-0.524326	0.502546	-0.0315218	-0.850595	0.615193	-0.991676	0.784674
323	-0.789075	-0.836877	0.648495	-0.498823	-0.636587	-0.213452	0.87587	-0.621241		-0.628255	0.738342	0.184945	0.161057	-0.211816	0.00641012	-0.560848	-0.853025	-0.993911	0.155238	-0.979202	-0.0565465	0.678329	0.626836	0.745724	0.411044	-0.568998	0.248635	-0.459712	0.859434	0.469784	-0.112059	0.89155	0.980005	0.199253	0.47976	-0.448721	0.195074	0.655687	0.195243	0.809565	0.984821	-0.912369	0.276608	-0.373869	-0.100332	-0.277617	0.453445	0.822867	-0.922763
324	-0.830464	-0.365778	-0.129783	-0.999773	0.746956	-0.0757767	-0.781947	0.296166		0.941095	-0.944224	0.0687147	0.892926	-0.649731	0.347807	-0.12766	0.890931	-0.169907	-0.0595273	-0.895613	-0.556505	0.0193788	0.393284	-0.977239	0.0180656	-0.417779	-0.00995967	0.837242	0.737805	-0.557167	-0.0856154	-0.782424	-0.990729	-0.724459	0.999247	-0.883584	0.00787377	-0.511464	0.109325	0.265701	0.00206398	0.523131	-0.399428	-0.603329	0.849798	-0.152283	0.537896	-0.200679	-0.364943
325	-0.987682	0.707107	-0.783289	-0.999664	0.606555	0.476283	0.862416	-0.902683	0	-0.79153	-0.752103	0.0985281	0.939628	-0.312651	-0.470337	0.594863	-0.957884	0.909174	0.798369	0.964085	-0.353039	-0.542398	0.999842	0.999274	-0.899357	-0.998929	-0.999965	-0.759561	-0.952879	-0.891222	-0.997555	-0.687745	-0.997312	0.606537	0.96625	0.332231	-0.691446	-0.259862	-0.874025	0.42949	-0.744039	0.170896	0.0671977	-0.529414	0.267192	0.0348149	0.661756	0.236973	0.980581
326	-0.426442	-0.503871	-0.418368	0.107118	-0.691753	-0.130874	-0.903513	-0.627067		-0.961061	0.174972	-0.647231	0.375031	-0.281391	0.042068	-0.515653	-0.020599	0.887153	0.993872	-0.999796	0.156435	-0.749293	0.618537	-0.931377	0.40348	-0.991959	-0.280737	0.815981	0.0425147	0.0387464	0	0.713866	-0.54241	-0.699085	0.833925	-0.136466	0.124433	-0.503758	-0.25966	0.118552	0.985305	-0.952634	0.67679	0.592438	0.9534	-0.467588	0.618827	0.96821	-0.858038
327	-0.986282	0.436702	0.728412	-0.784825	-0.884642	0.550747	-0.922383	-0.993356		0.364747	0.700784	0.599441	0.874194	-0.6138	-0.397293	0.730799	-0.972453	-0.96692	0.911075	0.949115	0.211046	-0.949224	0.966235	-0.820251	-0.91667	-0.787703	0.196541	-0.210721	0.883962	-0.166397	-0.0418136	-0.984088	0.224347	0.374131	0.963936	-0.179748	-0.485772	0.0454077	-0.195313	-0.0301439	-0.476908	0.472744	-0.773568	0.886458	0.830717	0.0481065	0.661909	-0.656411	0.216311
328	-0.8469	-0.0092162	-0.700422	-0.738408	0.981877	-0.430912	-0.963118	-0.903436		0.606151	0.662729	-0.743805	-0.51585	-0.55519	-0.0189764	-0.909377	0.995801	-0.0467807	0.570481	0.46099	-0.992959	-0.99472	0.956655	0.870955	0.260678	-0.943156	-0.0911226	0.0781804	-0.792516	0.903927	-0.503512	0.933133	0.747017	-0.138298	0.846233	-0.825555	-0.451161	0.110432	-0.23273	0.248307	-0.527798	-0.310415	-0.171805	0.144575	-0.471377	-0.686916	0.454923	0.914918	-0.341925
329	-0.877742	0.0517957	0.0525588	-0.522845	0.319041	0.26963	-0.999883	-0.821959		0.930751	0.999956	0.411108	0.749058	-0.68324	-0.201908	0.579494	-0.982573	-0.851112	0.715267	-0.787686	-0.0656117	0.87358	0.577111	-0.591194	-0.991641	-0.999126	0.416655	-0.55703	-0.653863	-0.193317	0.786318	0.985617	0.999174	-0.998439	0.990019	-0.362034	-0.891936	0	-0.798133	0.473658	0.999495	0.61062	-0.282376	0.722627	0.99666	0.453139	0.687216	-0.501969	0.127798
330	0.140438	-0.712312	-0.268156	0.376912	0.0206446	0.5588	-0.332676	-0.712647		-0.991629	-0.481837	0.930142	0.643023	-0.897681	-0.0105442	0.876186	0.907723	0.974187	0.950759	-0.964179	-0.123664	0.0478913	0.739858	0.99952	0.572885	-0.994486	0.212025	0.559643	0.983144	-0.644939	-0.938146	-0.979681	-0.879137	-0.539866	-0.113547	-0.927774	-0.62497	-0.720353	0.9916	0.990645	0.835314	0.808216	-0.545673	0.57751	0.526483	-0.4741	0.693162	-0.907758	-0.688557
331	-0.813273	-0.00438592	-0.143023	-0.562543	0.544055	-0.603234	0.908574	0.513502	0	0.0641533	0.307879	-0.882264	0.996526	-0.420299	0.00497506	0.998026	-0.890884	-0.846637	0.968308	0.927929	0.377469	0.0723058	0.880636	-0.379201	-0.757935	-0.926991	0.777941	0.993418	-0.894427	-0.904093	-0.231444	-0.808955	-0.995459	0.606388	0.772989	0.382602	-0.796484	0.977727	-0.681517	0.612173	-0.715447	0.405832	0.995918	0.492518	0.414565	0.496226	0.648706	0.842161	0.486609
332	-0.679369	-0.263117	0.674965	-0.813908	-0.40253	-0.168648	-0.370838	-0.497886	0	0.11607	0.524964	0.48234	0.993443	-0.566529	0.347023	0.0455316	-0.58201	0.413722	-0.454187	-0.395335	-0.379175		0.390687	-0.750149	0.479633	-0.974439	-0.210635	-0.21129	0.608746	-0.6477	-0.023658	0.997581	0.84727	-0.912685	-0.776468	0.718944	0.909403	0.646977	0.827371	0.558529	0.617707	-0.74797	0.0703697	0.207655	0.80529	0.79723	0.916696	-0.871837	-0.59271
333	-0.0590905	0.471894	0.225323	-0.683976	-0.270607	0.359248	-0.709269	0.5547	0	0.926063	0.514161	-0.258391	0.396114	-0.768166	-0.0170085	-0.953302	-0.170153	-0.686561	-0.256014	0.761939	0.221093		0.85884	0.863779	0.25814	-0.95095	-0.233947	-0.170829	0.555313	0.889238	-0.996347	-0.999228	-0.5547	-0.147619	0.898286	0.0423033	-0.855321	0.734253	0.176725	-0.808944	-0.141421	0.581736	-0.544361	-0.627107	0.495645	-0.432887	0.868602	0.9335	-0.141213
334	-0.998763	-0.910998	-0.88342	-0.351296	-0.0942218	-0.1786	-0.998219	0.993775	0	-0.620013	0.997827	-0.890082	0.416432	-0.0302891	-0.904163	0.410853	-0.738691	-0.970702	-0.99969	-0.427232	-0.532713	-0.0508447	0.864079	-0.903707	-0.99093	-0.747343	0.432163	0.0865163	0.979527	-0.954492	-0.250609	0.976201	-0.784679	-0.937033	-0.192889	-0.800133	-0.588843	0.283984	-0.448599	0.205517	0.93726	-0.0543197	0.96067	0.101925	0.406484	0.394821	0.992679	-0.982296	0.86263
335	-0.712194	-0.44663	0.0286308	-0.987757	0.97265	-0.171067	0.00436042	0.681551		-0.984465	-0.939057	0.692254	0.5547	-0.460753	0.277794	-0.946582	-0.692342	-0.751165	-0.80933	0.743065	-0.0921107	0.0461826	0.624421	0.864425	0.873527	-0.871715	-0.316228	-0.105906	-0.993463	0.999958	-0.927558	-0.999761	-0.712092	-0.743758	0.726662	0.439888	0.115138	-0.284682	-0.556655	-0.585563	-0.672179	0.0428178	0.558177	-0.549632	0.308582	0.95682	0.971807	-0.361095	-0.458376
336	0.445471	0.236956	-0.298764	0.217603	-0.891419	0.17238	0.67394	0.166873		0.597206	0.937697	-0.967884	0.903562	0.874227	0.0156231	-0.366787	0.25462	0.758537	0.680677	-0.938452	0.552097	0.401495	0.642449	-0.870239	-0.0464047	-0.870194	0.0626784	0.329914	-0.905045	-0.039733	0.455865	0.988904	0.933518	0.604041	-0.505236	-0.824159	-0.816389	0.196116	0.928477	-0.697458	-0.244615	0.937174	0.57678	0.535216	0.857778	-0.672566	0.747179	0.251114	-0.157797
337	-0.829026	-0.388832	0.375885	-0.272194	-0.32522	-0.720487	-0.805754	0.562332		-0.990771	-0.973932	-0.311791	0.98648	0.507842	0.394534	-0.995353	-0.986549	-0.856924	0.766538	-0.997605	-0.72488	0.447575	-0.299827	0.503211	-0.609711	-0.982986	-0.292754	-0.156717	0.901541	-0.913469	-0.584074	-0.0883134	0.0378676	-0.944304	-0.0690883	0.100277	0.964666	-0.127971	-0.242306	0.257811	0.723396	-0.681481	-0.997158	-0.577414	0.707107	0.94371	0.866207	0.398539	-0.714562
338	-0.0987516	-0.773348	0.0689335	-0.463453	-0.680451	0.370444	-0.922647	0.262109		0.920125	0.371391	-0.388373	0.181058	0.997499	-0.545194	-0.137713	0.387196	0.245821	0.592036	0.996426	0.620016	-0.289255	-0.944407	-0.965966	-0.994941	-0.960778	-0.586666	-0.00893862	-0.894427	-0.938573	0.3616	-0.898838	-0.851911	-0.950801	0.884385	-0.877403	-0.999639	0.959396	0.388718	0.246347	-0.977224	0.600531	0.458083	-0.101588	-0.947368	-0.879377	0.509698	0.541843	-0.56978
339	-0.940362	0.991228	-0.301759	-0.566602	0.817905	-0.559564	0.97742	-0.972579		0.0162845	-0.951874	0.55836	0.992162	0.99999	0.997054	-0.239052	0.834992	0.998751	0.689461	-0.871228	-0.021734	0.824485	0.710927	-0.356636	0.703513	-0.968609	0.885663	-0.116194	-0.999981	-0.479842	0.134382	0.99295	0.976187	-0.778339	-0.87502	0.320228	0.438162	-0.986167	0.261704	-0.345584	-0.868398	0.0102209	0.556324	0.107436	0.711431	0.863971	0.985113	-0.0928613	-0.69558
340	-0.956604	-0.958875	-0.338427	0.263184	-0.0142436	0.841879	0.217604	-0.394265	0	-0.597356	0.877797	-0.0717721	0.751829	0.732709	0.208003	-0.219559	0.948479	-0.949497	-0.89625	0.806355	-0.0240226	0.554538	0.0779342	0.980211	-0.251398	-0.248239	-0.36873	0.092268	0.148657	-0.996818	-0.642788	-0.978137	-0.855084	-0.199538	0.791875	-0.443559	-0.0968315	-0.269186	-0.256999	-0.999469	0.998446	0.351313	-0.0603165	-0.672482	0.778589	-0.25905	0.533782	0.219767	-0.503048
341	-0.897228	0.840297	0.220634	0.273028	0.95716	-0.16593	0.258969	0.592505	0	-0.994107	0.817739	0.152291	0.256681	0.992452	-0.245142	-0.579841	-0.984935	0.536008	0.450192	0.556458	0.636073	0.998018	0.152013	-0.955325	0.414058	-0.756405	0.157523	-0.17341	-0.831427	0.989826	0.689105	0.509411	0.510448	-0.178676	0.452047	0.631646	-0.251531	-0.430223	0.252422	0.675981	-0.851927	0.903383	-0.240966	-0.537702	-0.95057	-0.184735	0.692755	-0.531466	0.438292
342	-0.408913	-0.892529	0.614908	-0.416416	0.793117	-0.472489	-0.881895	0.778184		0.973651	-0.995737	-0.59432	0.342209	0.886072	0.140053	0.0327975	-0.996224	-0.717243	-0.688721	-0.966913	-0.992947	0.396716	-0.0594453	-0.295367	-0.960339	0.345793	0.180652	-0.683767	0.86666	0.833981	-0.992488	0.949388	0.950653	-0.653681	0.0904375	-0.949432	-0.411947	-0.288689	-0.581967	0.0727157	0.00336698	-0.90829	-0.898593	-0.82682	0.446098	0.991553	0.481568	0.61677	-0.999908
343	0.0232495	0.367267	-0.297541	0.627097	-0.778331	0.558198	0.0710367	-0.870166		-0.661441	-0.975251	-0.0162316	0.791553	0.999701	0.250245	-0.620937	0.0504511	0.347875	0.925361	0.986785	0.523314	0.957404	-0.348373	-0.801849	0.572753	0.966138	-0.00303029	0.317976	-0.625542	-0.999998	0.354357	-0.837294	0.571711	-0.638142	-0.207993	0.946752	-0.895013	0.351123	-0.442322	-0.628009	0.530656	0.0355262	0.354941	-0.644308	0.911681	-0.382596	-0.567485	0.0114935	0.755248
344	-0.969132	-0.700689	0.0995037	0.0499376	-0.724171	-0.427132	-0.304226	0.0777583		0.749171	0.698511	-0.345357	0.0160945	0.946109	-0.467029	-0.837419	-0.355955	-0.702494	-0.267957	-0.998336	0.413005	0.373611	0.426387	0.0204418	-0.019008	0.348187	-0.0489977	-0.315951	-0.479121	-0.618408	-0.43456	0.169619	-0.485194	0.538359	-0.915017	-0.469155	0.237166	0.723836	-0.683122	0.977688	-0.544535	0.653434	0.122731	-0.867277	0.263041	0.232308	-0.328521	0.517826	-0.969345
345	-0.207504	0.985474	0.219956	0.650113	0.550443	0.276388	-0.990257	-0.593572		-0.773917	0.200253	0.345039	0.599022	0.397994	0.259294	0.0649278	-0.978891	0.768819	0.0618579	0.747004	-0.776075	-0.649233	-0.153223	0.999639	0.282989	0.299563	-0.0145616	0.187234	-0.188904	0.896324	-0.383015	-0.878636	0.99317	-0.630303	0.784046	0.225924	-0.239343	0.968344	-0.10072	-0.337947	-0.439615	-0.343126	0.465881	-0.927179	0.0361288	0.332259	-0.908564	-0.228492	-0.927545
346	-0.235651	-0.433816	-0.269432	0.241384	0.995396	0.0298004	-0.836372	0.673156		0.734743	-0.182402	-0.461079	0.288612	0.711423	-0.283817	-0.14997	-0.982813	-0.58415	0.912211	-0.706511	0.235204	0.301626	-0.035905	-0.817968	-0.019559	0.732042	-0.145494	-0.285949	-0.750513	-0.843179	-0.033961	0.931861	-0.767034	-0.54894	0.342328	-0.0656316	0.2356	-0.0506107	-0.373806	-0.550803	-0.287348	0.662058	-0.389941	-0.179596	0.995422	0.0790332	-0.808522	0.135329	0.852345
347	0.879862	-0.935535	0.225782	0.355619	-0.740719	-0.370308	0.92673	-0.884714		0.816539	0.233926	0.149702	-0.378633	0.890142	0.697253	-0.884385	0.543032	0.687779	0.874513	-0.987918	-0.613159	-0.157012	-0.141725	0.966361	-0.852242	0.505694	-0.913812	0.99316	0.987916	0.306194	0.960104	0.155886	0.675333	0.0370435	-0.558723	0.433871	0.488339	0.73332	0.565348	0.911587	0.3097	-0.794358	0.553898	-0.408794	-0.118794	-0.797119	-0.999702	0.944937	0.430893
348	-0.810708	0.2799	0.0991402	0.85677	0.218472	0.670619	-0.77166	0.260885		-0.974844	-0.630062	0.987204	0.914782	0.999941	-0.928477	-0.579664	-0.925471	-0.994405	0.838258	-0.952123	0.425136	0.877668	-0.328542	-0.953073	0.999998	0.999539	0.959569	-0.98246	0.963146	-0.989164	-0.213592	-0.90145	-0.918084	-0.999684	0.504684	-0.543878	0.232573	0.679042	-0.0129579	-0.717778	-0.692146	0.355995	0.18927	-0.641908	0.18315	-0.169274	-0.680451	-0.825178	-0.995833
349	-0.0563207	-0.794047	-0.852548	-0.769225	-0.0462824	-0.714073	0.732306	-0.983607		0.999709	0.905409	-0.969862	-0.997659	0.448215	0.584469	0.994291	-0.77075	0.985788	0.578453	0.976417	-0.988745	0.382259	-0.0741921	0.898048	-0.889661	-0.760374	-0.424681	0.999134	0.637814	-0.353378	-0.955637	0.956867	-0.220617	0.288144	0.133558	-0.999957	-0.827977	0.998228	-0.878096	-0.515377	0.979952	0.329522	-0.914918	0.0324257	0.0969438	-0.623905	0.976712	0.883604	-0.919341
350	-0.269932	-0.412747	0.636881	0.801733	0.986046	0.199119	-0.999993	-0.631637		0.8081	0.0433517	0.818557	-0.0597732	0.999101	-0.0736006	0.608708	0.0841285	0.978661	-0.746845	0.160715	-0.197636	0.137686	-0.625644	-0.835495	-0.590603	0.133545	0.612313	-0.972824	-0.825656	0.154013	0.88242	-0.792606	-0.99278	-0.370515	-0.642414	0.0481138	0.939501	-0.714792	-0.471185	0.0256041	-0.904213	-0.405094	0.62973	-0.368104	0.191315	0.32628	0.924557	0.282442	0.177919
351	-0.794792	-0.331088	-0.87618	0.323878	-0.634956	-0.597079	0.90476	-0.794748		-0.820693	0.744569	-0.222398	0.494214	0.800395	0.147982	0.848533	0.988732	-0.986768	0.152346	-0.234677	0.847642	-0.221427	-0.146309	0.959737	0.717654	-0.734142	-0.33441	0.117901	0.0949673	-0.80156	0.533566	-0.876765	0.997082	0.429934	-0.966868	0.609711	-0.684698	0.0113715	0.055179	0.937884	0.751066	0.126017	0.157733	-0.588495	0.742958	-0.229122	0.940525	0.998379	-0.193633
352	0.325364	-0.999978	-0.0764044	0.622542	0.808356	0.0693975	-0.987217	0.852147		0.99095	-0.836941	-0.846504	0.832938	0.961307	-0.312897	0.540287	-0.889374	0.987945	-0.854889	-0.998273	0.261172	-0.56492	-0.445076	-0.0123957	-0.984003	-0.355995	-0.0143722	0.365064	-0.994879	0.915812	-0.688306	0.996054	0.533271	-0.697355	0.363307	0.979118	0.671673	-0.828875	-0.846823	-0.986572	-0.0393312	-0.618732	-0.154677	-0.770572	-0.961786	0.395208	0.954037	-0.889029	-0.288192
353	-0.957967	0.940305	0.0598242	-0.487334	-0.707107	-0.0495259	-0.38274	0.293306		-0.925797	0.811196	-0.170017	0.0623186	-0.296239	0.951709	0.176664	0.710094	-0.988812	0.960048	-0.937027	0.924017	-0.0692548	-0.779392	-0.980523	-0.171146	-0.514682	-0.918952	-0.539155	0.917671	-0.296476	-0.874157	-0.999444	-0.891697	0.317909	0.00123457	-0.256333	-0.554917	-0.15538	-0.474584	0.270293	-0.695332	0.511654	0.898316	-0.59988	0.0444765	-0.592817	0.732689	0.0206852	0.597308
354	-0.328315	-0.928227	0.48849	0.764307	-0.0775864	0.144307	0.8947	0.683126		0.977533	-0.979424	0.349334	0.674532	0.99157	-0.957245	0.99152	-0.791584	-0.00611609	0.878211	0.990468	0.930524	0.177651	-0.839379	0.961193	0.107037	0.997054	0.375923	-0.106953	0.990914	-0.482133	0.790471	-0.808423	0.867878	-0.34665	-0.879776	-0.713264	-0.356943	0.362194	-0.999728	-0.157492	-0.651069	-0.312672	0.0235537	-0.715193	-0.954163	0.725496	0.632028	-0.87398	0.942778
355	-0.817997	0.874157	0.220679	0.944372	-0.625347	-0.182241	-0.330046	0.740258		0.257153	0.600238	-0.721414	0.999742	0.493864	0.725737	-0.404299	-0.968031	0.980155	0.661048	0.885272	0.480558	0.822956	-0.90342	0.889258	0.949481	-0.78657	0.392672	0.622375	0.477513	-0.766255	-0.61478	0.999995	-0.97381	0.629937	0.990342	0.98759	0.891713	-0.033031	0.764813	-0.508548	0.530351	0.953301	0.999386	0.0521901	-0.160443	-0.184189	0.250938	0.729683	-0.862386
356	-0.354879	-0.476413	0.274362	0.167574	-0.920212	0.368846	0.3061	0.914789		-0.54072	-0.504833	-0.426587	0.795964	0.991757	-0.998868	0.642676	0.999455	-0.987774	0.19151	-0.960691	0.464007	-0.192874	-0.987968	0.993873	-0.780381	-0.646084	-0.591684	-0.731156	0.30072	-0.609566	0.973262	-0.892413	-0.792129	-0.274107	-0.0701299	-0.494508	-0.681943	0.863845	-0.873937	0.953252	0.540624	-0.884641	-0.791124	-0.397986	0.953808	-0.343421	-0.276365	0.566314	-0.997491
357	-0.351716	-0.640078	-0.251682	0.775562	0.78304	0.00833304	-0.923077	0.442262		-0.81293	-0.921982	-0.183403	-0.582253	0.992933	-0.763926	0.994915	-0.987448	-0.882841	0.430865	-0.863059	0.854866	0.280899	-0.740779	0.750427	0.53345	-0.610062	0.476499	0.906593	-0.691468	-0.67326	-0.00890653	0.959329	0.887804	0.0978883	0.0258813	-0.818678	0.92874	-0.00075815	-0.836702	-0.824835	-0.921927	0.687137	-0.299447	-0.496738	-0.442185	-0.203857	0.062991	-0.467393	-0.998265
358	0.370964	0.561593	-0.454777	0.896871	0.539149	-0.0984209	-0.922441	0.500134		0.971866	0.912246	0.468965	0.584802	0.974739	0.270144	0.999618	0.925058	-0.101232	0.695116	0.936049	0.428086	0.932534	-0.970334	-0.980509	-0.859855	0.072733	-0.763175	-0.833707	-0.362969	0.43817	-0.326601	-0.876917	-0.929786	-0.57475	0.130322	0.511676	0.943751	0.626483	-0.997516	-0.642795	-0.921874	0.754443	-0.0618966	-0.715848	0.247293	0.42268	0.992681	-0.30641	0.978297
359	-0.700918	0.475172	-0.127778	0.741168	-0.997906	0.083972	0.559857	0.747729		0.865181	-0.672083	-0.599554	-0.680325	0.815143	0.178102	0.815327	-0.996411	-0.872562	0.97902	-0.99881	0.169098	0.101514	-0.90067	-0.0654059	0.620081	-0.572044	-0.0200712	0.492831	-0.92241	-0.847732	0.517454	-0.995519	0.0701188	0.53297	-0.262892	-0.105922	-0.693715	-0.918023	-0.268486	0.752175	0.652482	-0.480454	-0.934368	-0.973715	0.411382	0.819507	0.940291	0.543157	-0.908407
360	-0.310519	-0.476371	0.609489	0.997525	-0.0985281	-0.595559	0.98586	0.770522		-0.895659	-0.951978	-0.404067	-0.670977	0.89063	-0.995818	-0.57044	-0.930408	0.996621	0.0487226	0.952155	0.409815	-0.903548	-0.935328	0.410678	-0.998525	-0.571854	-0.936792	0.715504	-0.329557	0.73456	0.16476	0.897687	0.823528	-0.0796304	0.485444	-0.99684	0.691486	0.991304	0.788216	0.352116	-0.164804	0.0961232	0.914793	0.0306761	0.595459	-0.269996	0.985348	-0.88853	-0.497418
361	0.0283901	0.0320348	0.308807	0.936934	-0.482839	0.342504	-0.797502	0.14712		-0.841938	0.91402	0.382135	-0.270791	0.777143	-0.148554	0.740987	0.176761	-0.0367031	0.111258	-0.715677	0.615108	0.670875	-0.995499	0.919437	0.66501	-0.531422	-0.126331	-0.592035	0.80049	-0.486531	0.090442	-0.814514	-0.998728	-0.687271	-0.976187	0.69888	0.779093	0.320899	0.25441	0.516513	0.156213	0.806717	-0.538523	-0.592574	0.240565	0.655412	0.891755	0.927739	-0.134303
362	0.836048	-0.98408	-0.833592	0.961524	0.93862	-0.875372	0.61714	0.0564317		-0.808184	-0.396795	-0.252422	-0.982812	0.978366	-0.615922	0.813545	0.978173	0.0720502	0.514627	-0.0388057	0.0681781	-0.637993	-0.988765	0.295306	0.0375674	-0.741617	0.938579	-0.946681	-0.980472	0.97682	-0.276594	-0.201034	0.927694	0.881873	-0.764766	-0.962593	-0.680007	0.638276	0.463161	0.676553	-0.77289	-0.700118	-0.743843	-0.603311	0.900039	0.414926	0.496245	-0.311551	0.301193
363	0.191897	0.862945	0.917487	0.995996	-0.5043	0.297165	0.0831274	0.611975	0	0.77758	-0.526487	0.60135	-0.905186	0.986014	0.454019	0.890562	0.138938	0.942682	0.41031	-0.997999	0.329651	0.144923	-0.999494	0.300354	0.877896	-0.862163	0.0587986	-0.845115	-0.230323	0.999898	0.833853	0.950594	0.951638	-0.943647	-0.632953	0.530748	0.143751	-0.971878	0.990214	-0.965093	0.905647	0.663842	0.752393	-0.703843	-0.998245	0.278467	0.999693	-0.459854	0.239019
364	-0.718512	-0.167133	-0.679015	0.489445	-0.551948	0.0747899	-0.968982	-0.902748	0	-0.99098	-0.535561	-0.963411	-0.982251	0.0449336	-0.789122	0.846432	0.998353	-0.977395	0.358566	0.851061	0.106065	-0.731055	-0.873865	0.920384	-0.116519	-0.685253	0.270563	-0.888262	0.165814	0.248861	-0.350444	-0.995549	-0.94346	0.528993	0.972082	-0.876696	0.450644	0.0459802	0.889288	0.631805	0.794162	0.27351	-0.809942	-0.704703	0.724999	-0.407114	0.989605	-0.773242	0.386996
365	0.763866	-0.879292	0.109284	0.935664	0.535423	-0.0397774	0.960672	0.741685		0.951067	0.587532	0.641802	-0.761067	0.865752	0.0772777	-0.178812	0.98556	0.834535	-0.790822	-0.898536	0.4981	0.605702	-0.952656	-0.962964	0.890593	0.729127	0.374574	-0.033064	0.587563	-0.618101	0.591696	0.818711	0.993458	-0.992974	-0.976656	-0.359843	0.259533	0.305158	0.650931	0.999855	-0.680762	-0.719233	-0.316744	-0.732522	0.202503	0.886643	0.91197	-0.797851	-0.340274
366	-0.228996	-0.945407	-0.0901912	0.798557	0.938769	0.196592	-0.38746	-0.987146		-0.568046	0.506344	-0.965133	-0.499146	0.612729	-0.278515	0.547831	-0.952959	-0.823582	-0.279614	-0.598821	0.175623	0.964008	-0.992616	-0.558274	-0.926149	0.577265	0.0962433	-0.0112628	-0.338325	0.999313	0.113403	-0.610891	-0.974587	-0.640588	0.886938	-0.165541	-0.100165	0.861934	-0.182883	0.88162	0.504863	0.903288	-0.0960543	-0.864951	0.688234	-0.940757	0.783365	0.240142	-0.882468
367	0.447214	-0.486201	0.441119	0.989811	-0.896255	-0.714359	0.174151	0.378956		-0.845761	-0.825152	0.0658466	-0.237869	0.911417	0.930368	0.489214	-0.759809	0.887299	0.41957	-0.925547	0.475085	0.404406	-0.862148	0.999412	0.99304	-0.550313	0.0177094	0.798815	-0.157792	0.599025	0.221393	0.993405	0.941095	0.206755	-0.0984948	-0.952181	-0.494899	0.998432	0.789526	-0.800756	0.362446	-0.716194	0.373486	-0.877726	0.653898	0.512809	0.930203	-0.374523	0.614378
368	-0.954342	-0.924017	0.275311	0.979488	0.506528	0.0229824	0.308807	-0.834686		0.934797	-0.992835	-0.551564	-0.7153	0.913812	0.604386	-0.582385	-0.947604	0.996488	0.900258	0.806986	-0.317983	0.899668	-0.939275	0.921426	0.470424	0.159403	0.980581	-0.392881	0.58596	-0.893893	0.133641	-0.983244	0.995443	0.143606	-0.664999	0.772762	0.74167	0.305928	0.0804031	0.894936	0.450058	0.186867	-0.947527	-0.999994	0.94007	-0.315892	0.78228	0.19087	0.975236
369	0.195736	0.992338	-0.998997	0.286172	0.504474	-0.558215	0.996655	0.958931		0.88496	0.63505	-0.0126773	0.153441	0.349966	-0.335784	-0.218614	-0.986235	0.472429	0.0527355	-0.977737	0.288062	0.832944	-0.621604	-0.996462	-0.171341	0.0106946	-0.997575	-0.573857	-0.999723	0.739772	0.949966	-0.421111	-0.89613	0.129413	-0.96877	-0.990621	-0.293161	0.646848	0.164135	-0.993235	-0.187373	0.556088	-0.37982	-0.930597	-0.180875	-0.487445	0.962365	0.866329	-0.54451
370	-0.856487	0.301026	-0.477513	0.953538	-0.933803	0.291414	-0.932513	-0.637041		-0.814081	-0.436138	0.962351	0.657418	0.912645	0.199256	0.329557	0.962471	0.747537	-0.989471	-0.99702	0.707107	0.855838	-0.939483	-0.297604	0.0322621	0.155854	-0.162593	0.62157	0.838561	-0.941512	-0.401375	0.863138	0.807434	0.0728284	-0.922486	-0.992529	0.913188	-0.0791449	-0.251725	0.408249	-0.765465	-0.843845	0.511034	-0.998266	-0.752577	0.726018	-0.747116	-0.961846	0.957107
371	0.0302337	0.982217	1	0.925259	0.817638	-0.654931	-0.762816	0.823836	0	0.907259	-0.536071	-0.550945	-0.466086	-0.661815	-0.999222	-0.99453	0.855772	-0.999664	0.900238	0.999437	-0.171899	0.809134	-0.734779	-0.980267	-0.999946	-0.937749	-0.992099	0.0269398	0.885383	-0.587079	-0.231384	-0.886941	0.92828	-0.535273	0.946066	0.999164	-0.715782	0.973709	-0.581748	0.991801	0.643424	0.598248	0.647648	-0.936682	0.770574	-0.457123	0.11459	0.440629	-0.406685
372	-0.58651	-0.285092	-0.858184	0.993559	-0.588367	0.384319	-0.908238	-0.643627		0.983371	0.494899	-0.79144	0.514412	-0.982289	0.310196	0.568636	-0.244256	-0.87349	0.528136	0.949867	0.577544	0.843945	-0.583668	-0.815853	-0.736901	-0.553694	0.221071	0.675653	-0.937489	-0.868675	0.413316	-0.985782	-0.84053	-0.448219	-0.243698	-0.523953	0.304334	0.804327	-0.41865	0.700794	-0.151971	-0.852601	-0.659323	-0.948241	-0.586468	0.760242	-0.743911	0.904994	0.601039
373	-0.47009	0.450332	-0.605395	0.996034	0.00641012	-0.909474	-0.546623	-0.545194	0	0.999987	0.620309	-0.883838	0.733376	-0.676015	-0.831219	-0.787228	-0.976634	0.640409	0.570571	-0.986609	-0.24961	0.681641	-0.0954231	0.954413	0.408176	-0.831448	0.777941	0.778126	-0.0183455	-0.775192	-0.206226	0.939211	-0.979662	0.385464	0.644075	0.9899	-0.857965	-0.0559747	-0.0974069	0.961614	-0.954204	-0.553556	0.432134	-0.954014	0.474386	0.96282	-0.999902	-0.663398	-0.0610067
374	-0.00167504	-0.888399	0.413664	0.907836	0.941479	0.267395	0.195083	-0.710816		0.212724	-0.916324	0.751536	0.236207	-0.272223	0.167715	-0.175297	-0.955626	-0.887646	-0.050148	0.978574	-0.0422328	0.93535	-0.488735	-0.736801	-0.481919	-0.969244	0.658505	-0.782005	0.910909	-0.877765	-0.849044	-0.901056	0.381823	-0.713139	0.533782	0.308709	0.952155	0.988523	-0.823537	-0.574696	-0.0304427	0.976412	0.00203804	-0.484136	0.229933	0.420527	0.0231873	0.773046	0.953482
375	0.508585	-0.999468	0.188389	0.957616	-0.0629815	0.230025	-0.785518	-0.574126		-0.710131	-0.644597	-0.0483306	0.13966	-0.983163	0.999992	-0.163759	0.984306	-0.898005	-0.119138	-0.99992	0.631576	0.687886	-0.600636	-0.994757	-0.923748	-0.374696	-0.0490636	-0.875867	-0.695526	-0.963735	-0.937348	-0.108204	0.999428	-0.215358	-0.757359	-0.996477	0.99991	-0.0115266	0.999878	0.606211	0.671715	-0.296119	-0.948683	-0.967426	0.626034	-0.816788	-0.999109	-0.368364	-0.0991402
376	-0.127214	-0.610442	0.252518	0.559201	-0.923295	-0.32394	0.341041	-0.46057	0	-0.968085	-0.515474	-0.142058	-0.793711	-0.0169928	-0.210861	-0.820007	-0.147327	0.663804	0.0651137	-0.894554	-0.295708	0.936228	-0.663143	-0.400819	0.879393	-0.533738	-0.384223	0.970361	0.120914	-0.301028	-0.413968	0.664958	0.555153	0.63985	0.443698	-0.812715	-0.795092	0.704066	0.982872	0.965357	-0.961194	0.762118	-0.0332621	-0.454777	0.73955	0.922885	-0.97108	-0.62133	0.84937
377	0.000999001	-0.1982	-0.338199	0.99244	0.941913	0.252994	-0.531175	0.29626		-0.152556	-0.861168	-0.0457853	0.0627529	-0.707552	0.990563	-0.961328	0.897579	-0.240678	0.507742	0.99717	0.994247	0.881521	-0.419827	-0.182712	-0.561173	-0.403351	0.944359	-0.240583	-0.55153	-0.92054	0.21561	-0.991614	0.762022	-0.850088	-0.189914	0.570732	0.115312	0.967736	0.115813	0.0318987	-0.721546	-0.372602	-0.520241	-0.400544	-0.853915	-0.285805	-0.989898	0.88124	-0.377007
378	-0.719844	0.67168	-0.472183	0.85244	-0.440879	-0.0822157	-0.909625	-0.903314	0	0.743992	-0.912763	-0.460479	-0.255595	-0.996932	-0.448991	-0.94237	-0.985007	0.425164	0.735521	-0.847538	-0.449418	0.915635	0	-0.299992	-0.802173	-0.968622	-0.457677	-0.991098	-0.0152189	-0.901844	-0.763861	0.551107	-0.610228	0.652906	0.858826	-0.564018	-0.112761	-0.30039	-0.858045	0.993772	-0.500503	0.062066	0.836124	-0.879472	0.229356	-0.593076	-0.693862	-0.999782	0.525588
379	0.36481	-0.762323	0.459615	0.832804	0.58294	-0.121297	-0.717701	-0.354309	0	-0.636792	-0.993588	0.504944	-0.329492	-0.818557	0.556065	-0.0924812	-0.766457	-0.450923	0.804541	-0.994795	-0.426797	0.90359	-0.255783	0.744814	-0.0341395	0.493152	0.874048	-0.874844	0.75074	-0.876556	-0.225838	0.976485	-0.673358	-0.441544	-0.701085	0.99018	0.0116837	0.806253	0.237216	0.397179	-0.145003	-0.374651	-0.812002	-0.164883	0.469155	0.218876	-0.918679	0.97047	0.933515
380	0.192414	0.755878	0.730463	0.967612	-0.724256	0.0495474	0.913688	-0.980911		0.880811	0.424769	-0.400819	-0.272228	-0.855905	0.466409	0.129547	0.435536	0.114427	0.762241	-0.9277	0.800604	0.975663	-0.526573	0.812763	-0.998287	-0.654236	0.991078	0.760374	0.910648	-0.716285	0.0902732	-0.787445	-0.940334	0.306213	0.994749	-0.819646	-0.108012	-0.0658466	0.912664	-0.966034	0.737044	0.637614	0.99476	-0.175399	-0.422506	-0.334088	-0.313757	-0.328713	0.484163
381	-0.304636	-0.438013	-0.318449	0.960523	0.512955	0.756452	-0.954245	-0.836501	0	-0.892341	-0.622841	-0.55508	-0.113069	-0.357365	0.953739	0.326337	-0.756169	0.977205	0.922067	-0.959973	0.73653	0.945839	-0.679656	-0.81774	-0.71737	-0.881852	-0.799062	-0.524188	-0.983738	0	-0.240494	-0.999713	-0.9221	-0.543895	0.281716	-0.991381	0.0210164	-0.559142	0.161898	0.938995	0.828067	-0.985724	-0.539407	-0.525869	0.95158	0.526412	-0.731545	-0.972125	0.291626
382	0.135917	0.996998	-0.712161	0.911113	0.173026	-0.826685	-0.931546	-0.548344	0	0.998013	0.587943	0.552975	-0.572025	-0.933487	-0.913527	-0.989498	-0.676734	-0.918392	0.998164	0.913328	-0.387532	0.943209	-0.999921	0.173518	-0.912632	-0.838628	0.847553	-0.423233	0.976672	-0.579836	-0.0221788	0.711868	0.980581	0.391719	-0.226251	-0.404529	0.238196	-0.569899	-0.919409	0.999991	0.955238	0.424986	-0.248819	-0.121415	0.480513	-0.0229072	-0.301892	0.594601	0.0373431
383	-0.110961	-0.644871	0.404803	0.935139	0.891414	0.0851596	0.845489	-0.359536	0	-0.998055	0.516904	0.279437	0.533732	-0.770914	0.379067	0.32077	0.528236	-0.987992	0.5504	-0.732976	0.477717	0.999571	0.170486	0.98732	0.939896	-0.29066	0.665615	0.528186	-0.971781	-0.408908	-0.413386	-0.768221	0.452826	-0.725296	0.13598	0.655687	0.691168	-0.0962614	-0.433816	0.994949	-0.986547	-0.313676	0.975133	-0.252397	-0.225266	0.503529	0.087855	0.834686	-0.105828
384	0.176737	0.905974	0.970965	0.968756	-0.175184	-0.978106	-0.998658	-0.285462	0	0.974371	-0.581238	-0.959629	-0.466688	-0.733486	0.61952	-0.996168	-0.94237	-0.456678	-0.991719	0.89973	-0.0830455	0.953705	0.151205	-0.998456	0.367397	-0.80708	-0.640824	-0.467455	0.0646355	-0.416187	-0.836076	-0.945959	-0.964561	0.97813	-0.500123	-0.835417	-0.871812	-0.767859	-0.366525	0.997468	0.54586	0.158678	-0.370745	-0.208084	0.901653	-0.688749	0.352601	0.423755	0.922338
385	0.957726	-0.98665	-0.492228	0.993333	-0.0263067	-0.0104342	0.994929	-0.318591		0.544988	0.170382	-0.98599	-0.415681	-0.999995	-0.0866296	-0.848993	0.88133	0.838981	-0.35816	-0.993958	-0.357031	0.977886	0.936329	-0.949129	-0.603204	-0.744987	0.280819	-0.360856	0.915169	-0.805584	-0.589612	0.964674	0.816238	-0.856707	0.853556	-0.999996	0.839042	-0.834758	0.754654	0.72488	-0.513717	-0.999911	0.601592	-0.843185	0.759099	0.947291	0.725624	-0.951571	-0.46098
386	-0.336014	0.324179	-0.526573	0.5547	-0.892547	-0.116591	0.741758	-0.466795		-0.707107	-0.928792	0.999191	-0.0576205	-0.998177	-0.268076	0.358979	-0.34962	-0.894263	-0.295068	-0.532813	0.449134	0.960835	-0.88563	0.965984	-0.751808	-0.890043	-0.151829	-0.227454	-0.613029	-0.822627	-0.496255	-0.81109	0.980681	-0.059795	0.0173344	0.998498	0.865318	-0.350436	-0.99997	0.579964	0.864495	0.508813	-0.961524	-0.462112	0.0594061	-0.990345	-0.0572205	0.135751	0.999331
387	-0.800177	-0.0364203	-0.991075	0.925138	0.496139	-0.627009	0.993599	0.655095	0	-0.999642	0.259576	-0.451703	-0.413803	-0.94664	0.0338788	0.383481	-0.869976	0.361528	0.287725	-0.441029	-0.916334	0.983816	-0.596324	0.420556	-0.973885	-0.544386	-0.86836	0.21309	-0.62058	-0.174098	-0.684804	0.374194	-0.999931	-0.300349	0.973385	0.82575	-0.980581	-0.0556872	-0.464993	0.940699	-0.988598	-0.507642	0.4741	-0.865254	0.85778	0.485643	-0.010502	0.776562	0.899561
388	0.276032	0.994476	-0.240296	0.999905	0.333385	-0.313539	-0.937836	-0.274721	0	-0.934436	0.432891	0.0620272	-0.192223	-0.952583	-0.995396	-0.407513	0.508607	-0.976269	0.679331	-0.999895	-0.0609796	0.980383	0.0291792	0.978428	0.364597	-0.522935	0.999939	-0.444233	0.97809	-0.998144	0.703985	0.978629	0.968792	0.692084	0.901502	0.490469	0.98346	-0.997181	-0.237564	0.488079	0.533881	0.251531	-0.90856	-0.366793	0.590382	-0.0963076	-0.224654	-0.356608	-0.197292
389	0.435521	-0.10025	-0.0575965	0.923759	0.366941	0.205438	-0.294605	0.524945	0	0.651392	0.693077	-0.346637	-0.0286429	-0.998094	0.385299	0.959663	0.696275	0.406394	-0.984584	-0.676241	0.131646	0.961644	-0.76496	-0.970101	0.533301	-0.993444	-0.119464	-0.559207	-0.835848	-0.838701	-0.250443	0.00281689	-0.706018	-0.698495	-0.271795	0.878691	-0.169211	-0.975112	-0.514496	0.925742	0.237162	0.461615	0.195111	-0.961311	0.592422	0.271397	-0.957981	-0.999867	0.539005
390	-0.374789	-0.45902	0.953911	0.202398	-0.207708	-0.747409	0.944122	0.422113	0	-0.946325	0.284245	-0.892337	-0.605347	-0.873035	-0.617712	0.882754	0.956277	0.684484	-0.931134	-0.87758	0.0252551	0.991385	0.500927	-0.99973	-0.85388	-0.77158	0.900835	0.628131	0.875367	-0.676892	-0.587174	0.980581	0.727832	-0.8	0.748638	-0.830567	0.959919	0.404293	0.895869	0.547821	0.296438	-0.48116	0.459046	-0.336415	0.77044	0.335162	-0.0247204	0.755435	0.916204
391	0.385267	0.896552	-0.550595	0.784725	0.67042	0.202578	0.302497	0.988385	0	0.718397	-0.0727143	0.14584	0.921228	-0.868154	0.513405	0.115728	-0.80371	0.22644	-0.254571	0.994228	0.450317	0.957999	0.196453	0.714518	-0.559567	-0.458485	0.178636	-0.83878	0.958808	-0.889194	-0.0340382	-0.899162	-0.980747	0.200214	0.493606	0.484579	0.348533	-0.876757	0.557304	0.977951	-0.930881	-0.243019	0.037407	-0.47106	0.177658	-0.626408	-0.634507	0.182582	-0.986896
392	-0.977931	-0.851363	0.791746	0.848215	-0.83205	-0.273171	-0.648999	-0.00340134	0	0.870138	0.799606	0.71243	-0.283693	-0.981278	-0.318721	-0.25088	0.787995	0.902246	-0.731055	0.328148	-0.9042	0.995952	0.969193	0.600137	0.942428	-0.788537	-0.211404	-0.999852	-0.999998	-0.738552	0.0608973	0.966807	0.927798	-0.103831	0.325839	-0.544895	-0.14253	-0.108249	-0.666109	-0.163031	0.606914	0.373496	-0.00566029	-0.197616	0.760799	-0.209325	-0.453546	0.917013	0.562609
393	0.119384	-0.865155	-0.21649	0.78646	-0.689052	-0.29934	-0.218146	0.752301	0	0.875011	0.347234	0.534372	0.312903	-0.952011	0.90422	0.821702	0.124971	0.920682	-0.870189	-0.9642	0.268113	0.971982	-0.619684	-0.953611	0.748822	-0.788004	-0.243597	-0.623039	0.944075	0.114006	-0.768012	0.933707	0.586852	0.0895714	0.588525	0.817806	0.379149	-0.104685	0.749156	0.811504	-0.988146	0.0540222	-0.956223	-0.420517	0.997507	0.373528	-0.788145	0.0657258	0.960397
394	-0.914321	0.735574	-1	0.960706	0.900779	0.064104	0.50343	0.20239		-0.996147	-0.562738	0.633661	-0.711398	-0.989412	-0.186043	-0.943858	0.528502	-0.321631	-0.897076	-0.999322	-0.105469	0.635035	0.0524465	-0.763622	-0.917756	-0.817955	-0.493126	0.115252	-0.97183	-0.980212	0.124865	-0.999209	-0.197181	-0.522344	-0.612557	0.350989	0.947326	-0.293115	-0.375631	0.950066	0.348657	-0.984395	0.374194	-0.789459	0.263423	-0.225786	-0.998542	0.970694	-0.490998
395	0.639616	-0.276644	0.900469	0.973528	-0.270787	0.944324	-0.939333	-0.129339		0.913093	0.733497	-0.784272	-0.688749	-0.988566	-0.373968	0.856604	-0.912246	-0.942028	-0.999277	-0.934752	0.982053	0.664407	-0.421355	0.980535	0.882479	-0.707625	0.516886	0.419058	0.871316	-0.524685	-0.96472	0.852746	0.779548	0.557883	0.707107	-0.884805	-0.210137	-0.659424	-0.031861	0.111524	-0.732373	0.69465	0.86354	-0.555555	0.998691	0.171559	-0.0108532	0.357166	0.999697
396	0.0252213	-0.184999	0.3691	0.767943	0.142119	-0.071247	-0.516401	0.350577	0	0.549544	0.140266	0.206214	-0.507175	-0.998867	-0.407823	-0.615679	0.724439	0.961279	-0.292921	0.95809	0.197088	0.744829	-0.643999	-0.688018	-0.999617	-0.588656	0.171825	-0.141931	0.744357	-0.410417	-0.490551	-0.777727	-0.959911	-0.366361	-0.84964	0.814421	-0.609376	0.843305	0.202915	0.643016	0.140888	-0.28266	-0.207284	-0.464682	0.666053	-0.0933156	-0.0423839	0.896363	-0.847099
397	0.14681	0.658815	-0.191759	0.465378	0.061325	-0.810858	0.598289	0.680388		0.502424	-0.854298	-0.424167	-0.877774	-0.826521	0.306277	-0.520484	-0.953381	0.672479	-0.954037	0.499521	0.0758046	0.804762	-0.812031	-0.231533	0.812817	-0.632074	-0.0613095	-0.707107	0.976588	-0.999935	-0.794316	0.20709	-0.992552	-0.519706	-0.65441	0.405815	0.227833	0.0705162	0.973965	0.935942	0.108937	-0.558435	-0.648928	-0.599266	0.952261	-0.86079	-0.0361785	-0.201261	0.89504
398	-0.286943	-0.997982	0.201926	0.986489	-0.0212307	0.458499	0.494098	0.520001		0.101281	0.966801	0.416575	-0.652591	-0.745065	-0.0144216	-0.204721	0.90653	0.0110613	-0.463845	-0.883886	0.30005	0.393244	-0.843072	0.511706	-0.032581	-0.792849	0.356627	-0.20239	-0.972758	-0.00346819	0.137378	-0.505042	0.985137	-0.827217	0.707107	-0.0738717	0.445395	0.843404	-0.713315	0.997537	0.439553	0.242324	0.031497	-0.663021	0.897512	-0.953142	-0.00766261	-0.86226	0.863292
399	0.582143	-0.996889	-0.524353	0.994999	-0.492966	0.179973	-0.981529	-0.262199	0	-0.692902	-0.290398	0.253868	-0.516573	-0.922001	0.0702262	0.953297	-0.861934	-0.930431	-0.180535	-0.67555	0.0734055	0.919016	-0.854612	-0.956041	0.969637	-0.46021	-0.580578	0.393539	0.604076	-0.778182	-0.955675	-0.814828	0.539868	-0.121994	0.234342	0.888975	-0.221154	0.31316	0.146429	-0.931801	0.385542	-0.0566006	0.719401	-0.170594	0.977019	0.714933	-0.531204	0.815221	-0.878965
400	0.953994	-0.130184	0.752577	0.332293	0.758327	-0.594498	0.995392	-0.788024		0.901182	-0.247779	-0.991786	0.150532	-0.683941	0.00540533	-0.0612604	-0.99736	0.968375	-0.243467	-0.991976	0.278396	0.947886	-0.982993	0.995568	-0.67198	-0.704251	0.751759	-0.840189	-0.990011	-0.745241	0.0880916	-0.0797452	-0.590284	-0.814178	0.993938	-0.169058	0.98743	0.0779233	0.785882	0.841624	-0.571506	0.614667	-0.953837	0.051033	0.0271803	-0.801352	-0.44772	0.783914	0.803842
401	0.238868	-0.823857	0.431101	0.87769	-0.510749	0.93767	0.707107	-0.0279221	0	0.403344	-0.997015	-0.905597	-0.340979	-0.717974	0.995741	-0.640582	0.883869	0.605522	0.299275	0.983329	0.426505	0.324656	-0.998616	-0.992854	-0.936329	-0.701599	-0.676366	-0.0506326	0.708489	-0.496139	-0.341492	-0.740575	-0.868401	-0.376531	0.0197448	-0.735955	0.606895	-0.00455576	0.81681	0.691375	-0.126933	-0.719619	-0.28412	-0.965174	0.997009	-0.953853	-0.963837	0.996476	0.833853
402	-0.662672	0.172649	-0.616605	0.273717	-0.770671	-0.953849	0.710599	0.641767	0	-0.82396	-0.935251	-0.435809	0.0515893	-0.733816	0.740403	0.149333	-0.857887	0.360302	0.37501	0.741222	0.0708095	0.998681	-0.920105	-0.969621	0.973965	-0.60258	-0.342576	-0.207118	0.998821	-0.823189	-0.963355	0.266813	0.999396	-0.235475	-0.0339804	0.999344	-0.330274	-0.0509761	-0.978791	0.988658	-0.521656	-0.539159	0.336938	0.0121387	0.440022	0.231305	-0.99713	0.162516	0.71502
403	-0.0639186	-0.949926	0.289764	-0.789437	0.999473	-0.346274	-0.999977	0.447214		-0.332194	0.994	-0.759257		-0.998174	-0.99928	-0.979232	-0.722469	-0.767934	0.0568281	-0.986574	0.467685	0.98858	-0.982486	0.541905	-0.808995	-0.714549	-0.704317	-0.540979	-0.925263	-0.649845	-0.999978	0.859495	-0.938416	-0.808961	-0.477932	-0.569506	0.999964	0.0890653	0.0992803	0.976115	-0.481485	0.290482	-0.531836	-0.512074	0.925046	0.70978	-0.985535	-0.38541	-0.363654
404	0.922264	-0.453926	0.903502	-0.264772	0	0.331486	0.999682	0.612737		0.0663393	-0.81909	-0.660182	-1	-0.633186	-0.917904	-0.978503	0.815636	0.999965	0.736828	0.888292	-0.302447	0.83383	-0.994657	0.795263	-0.995522	-0.624524	-0.338155	0.818584	-0.938152	0.870392	-0.0188646	-0.960037	0.917366	-0.707568	0.209289	0.9556	0.111996	-0.436844	0.785871	0.482179	0.638556	0.502334	-0.968706	0.83062	0.243225	-0.976214	-0.985743	-0.0808159	0.84785
405	-0.588752	0.831194	-0.92564	0.145825	-0.983818	-0.479978	-0.916351	-0.576683	0	0.685723	0.586978	-0.506927		-0.740614	0.690211	-0.825011	-0.999719	-0.912618	-0.397737	-0.947746	-0.22236	0.70004	-0.995669	-0.980086	0.266586	-0.594051	-0.585707	-0.983754	0.670286	0.891955	-0.767154	0.995857	0.871006	-0.580159	0.0844244	-0.553626	0.110252	-0.0684522	-0.357298	0.997414	-0.936078	-0.455204	-0.186956	-0.969355	0.943178	0.979975	-0.842453	-0.587921	-0.601464
406	0.473624	0.445228	0.98387	-0.5849	0.940517	0.934741	0.562643	0.616164		-0.95543	0.157723	-0.850755		-0.901995	-0.00342464	-0.670913	0.981036	0.998239	0.788316	-0.933262	0.9142	0.530857	-0.787278	0.96521	0.430445	-0.572448	-0.435693	0.0080689	0.83269	0.757769	-0.998699	0.611709	-0.0332043	-0.468974	-0.774815	0.765018	0.0344623	-0.902457	0.173785	0.747791	0.707107	-0.0516107	-0.537921	-0.904455	0.120434	0.00638673	-0.813581	0.92473	0.999112
407	-0.850182	0.567242	-0.685172	-0.701129	0.9288	-0.543251	0.739887	0.654931	0	0.952744	0.790611	0.966009		-0.741161	0.127116	-0.535637	-0.966659	-0.999523	0.144209	0.981934	0.342304	0.400036	-0.883771	0.97591	-0.366485	-0.453137	0.691223	-0.251756	-0.197678	0.95261	-0.936973	0.955081	0.925399	0.878625	-0.014387	-0.286892	0.711582	-0.402778	0.577273	-0.0143526	0.517523	0.715865	-0.977035	-0.966711	-0.122173	0.398387	0.110432	0.357918	0.588172
408	0.406431	0.961792	0.68352	-0.980781	-0.0190183	0.0876246	-0.96913	-0.504777		-0.584916	0.925285	-0.128744		-0.877972	-0.0532576	-0.710946	0.693642	0.99929	0.66663	-0.975678	0.17928	0.635852	-0.999724	-0.935724	0.691424	-0.634734	-0.141663	0.238687	0.756363	-0.896724	0.306694	-0.988014	0.344817	-0.699166	0.0684753	0.925042	0.525766	-0.866092	0.998351	0.78066	0.302727	0.398325	0.869924	-0.767585	0.725652	-0.682983	0.276953	0.693182	0.917976
409	-0.321722	0.917653	0.532402	-0.906869	-0.28939	-0.0910332	0.899301	0.378226		-0.508934	-0.887882	-0.356506	-1	-0.99729	0.24211	-0.844494	0.2929	0.997159	0.0577071	0.970677	0.113657	0.9431	-0.952521	-0.999214	-0.972458	-0.340766	0.524705	-0.211972	-0.727457	0.999863	-0.889737	0.837116	-0.997992	-0.845944	-0.436492	0.0578738	0.156416	-0.845667	0.431287	0.319219	-0.95448	-0.284274	-0.447871	-0.741489	0.465746	-0.442639	0.864364	0.716263	0.98208
410	0.196817	0.454777	-0.641072	-0.949495	0.148968	-0.949601	0.930408	-0.701194		-0.90895	0.996639	0.983388	1	-0.926364	0.999375	-0.976187	0.806041	-0.999959	-0.345681	-0.977802	0.089007	0.409296	-0.406544	-0.704656	-0.743936	-0.70114	-0.199936	-0.966892	0.968706	0.989365	-0.986799	0.876641	0.997943	-0.511254	-0.167858	0.678207	0.9914	0.609088	-0.468442	0.99994	0.995256	0.641262	0.587804	-0.686656	-0.393645	0.275896	0.372994	-0.206959	-0.454863
411	-0.0114409	-0.474285	0.683777	-0.936277	0.494504	0.737325	-0.969783	-0.432782	0	0.873475	0.381005	-0.790606	-1	-0.771986	-0.347578	-0.538133	-0.763015	-0.798639	-0.656179	0.766467	-0.227108	-0.232981	-0.333135	0.954834	-0.561094	-0.416931	0.326876	-0.691926	-0.899491	0.999936	0.224283	-0.999993	-0.911237	-0.999315	0.120415	-0.767171	0.166226	-0.999915	-0.989625	0.465485	-0.775562	-0.919686	-0.659542	-0.966951	0.976385	-0.73994	-0.85865	-0.705989	0.928177
412	0.184229	0.733618	-0.584849	-0.672464	-0.736364	-0.479616	0.223868	-0.989949		-0.977062	0.923398	0.36741	1	-0.980935	-0.324239	-0.988527	0.896107	0.912111	-0.998019	-0.875765	0.529775	0.813241	-0.549881	-0.69381	-0.985083	-0.572242	-0.56209	0.674027	0.963705	-0.77202	-0.769242	0.999379	0.737154	-0.904009	0.253647	-0.0656117	0.421202	-0.673839	0.435683	-0.81188	-0.062126	-0.595762	0.583865	-0.841841	-0.872237	-0.459042	-0.252562	0.00249999	-0.404418
413	0.729025	0.996219	-0.727992	-0.913631	-0.00664437	-0.999496	0.483254	-0.977589		0.796248	0.997755	-0.914747		-0.989924	-0.377496	0.281673	-0.996033	-0.981013	-0.993003	-0.973929	-0.597988	-0.0592462	-0.87779	0.820342	0.884945	-0.451544	0.956054	0.222726	-0.987128	-0.898568	-0.760519	-0.960343	0.904294	-0.481053	0.0783652	-0.103606	-0.221621	-0.259137	-0.904158	0.926172	-0.784121	0.156711	-0.674624	-0.925807	0.86354	-0.353827	-0.601235	-0.999801	-0.112118
414	-0.692013	0.762305	0.788883	-0.910805	-0.397001	0.789117	-0.564901	0.216603		-0.999459	0.989858	-0.151183		-0.709763	0.718889	-0.264377	0.988344	-0.90926	-0.882826	0.236669	0.111128	0.151111	-0.470099	0.906738	-0.960824	-0.399343	0.37999	-0.273347	0.956942	0.980031	-0.505508	0.999149	-0.99255	-0.440791	0.839051	-0.976677	0.782705	0.754683	0.404747	0.186407	0.277814	0.742757	-0.00239807	-0.978129	-0.5128	0.91247	-0.157077	0.535661	0.811827
415	-0.6	-0.385146	0.433646	-0.888307	0.901575	-0.282522	0.970656	-0.994802	0	0.75094	0.909921	-0.740651	1	-0.819417	0.310575	0.510827	-0.758371	0.995122	-0.878373	-0.981607	0.0430313	0.947164	-0.461391	0.49103	0.181706	-0.589314	-0.0367771	-0.538776	-0.995602	0.292528	-0.666818	0.435169	-0.71243	-0.864741	-0.653356	0.810009	0.942117	-0.929006	-0.728344	0.0588298	-0.592293	0.776114	0.524555	-0.991766	0.459616	-0.473877	-0.328742	0.336183	0.248896
416	-0.502944	-0.683477	-0.801524	-0.463366	0.559247	0.594134	-0.836461	0.375705		-0.379468	0.786006	-0.849542		-0.792905	0.166542	-0.741848	0.997079	-0.745438	-0.953932	0.969345	0.647297	0.522676	-0.997548	-0.999988	0.674168	-0.604197	-0.0939226	0.593286	0.273943	-0.259526	-0.797742	-0.975843	-0.935561	-0.558324	0.128342	-0.626145	0.870824	-0.972964	0.902336	0.592205	0.9884	-0.520607	-0.710113	-0.958636	0.805748	-0.132307	0.881173	0.438467	-0.12446
417	-0.180119	0.380938	0.85001	-0.665449	0.333523	0.0315301	0.592897	-0.6	0	0.633304	0.495427	0.208704		-0.985716	-0.290319	-0.959492	0.948154	-0.736114	-0.972188	-0.969938	-0.123587	0.876812	-0.974054	-0.148227	-0.998579	-0.388779	-0.856396	-0.544749	0.995591	-0.783919	-0.992467	-0.980796	0.859374	-0.841178	-0.307222	0.0905357	0.219622	-0.391916	-0.748308	-0.25395	0.052103	-0.815443	0.76583	-0.996108	-0.689393	-0.519499	0.783873	0.936329	0.514586
[truncated: 248 more columns]
