# Supplementary material for: Cells use molecular working memory to navigate in changing chemoattractant fields
Source: eLife. 2022 Jun 6;11:e76825. doi: 10.7554/eLife.76825 (PMC9282860; doi:10.7554/eLife.76825)
Supplement: Figure 3—figure supplement 3—source data 1. [file elife-76825-fig3-figsupp3-data1.xlsx]

## Sheet: Supplement 3A
W/o Lapatinib	w. Lapatinib
124	0
0	52
212	1
0	1
100	10
292	100
30	40
40	0
132	53
214	0
204	26
160	30
136
20
182
68
120
0
0
38
0
52
148

## Sheet: Supplement 3B
T (min)	Cell_Top	Cell_Bottom
0	0.232855	0.363451
1	0.232855	0.363451
2	0.892302	0.561288
3	0.926043	0.530098
4	0.957731	0.562784
5	0.953218	0.600578
6	0.94484	0.591424
7	0.962654	0.679192
8	0.960118	0.687181
9	0.980385	0.706544
10	0.978759	0.690412
11	0.978212	0.667137
12	0.972037	0.669653
13	0.969672	0.700695
14	0.955466	0.720459
15	0.926438	0.739897
16	0.914315	0.766751
17	0.914392	0.773437
18	0.902998	0.803132
19	0.917436	0.83045
20	0.938086	0.855784
21	0.942956	0.874747
22	0.942171	0.897971
23	0.946995	0.921599
24	0.961104	0.929825
25	0.959171	0.945805
26	0.961161	0.952885
27	0.957415	0.968279
28	0.956006	0.975425
29	0.955075	0.983718
30	0.937726	0.986428
31	0.928355	0.984482
32	0.917761	0.983669
33	0.902745	0.98332
34	0.887257	0.983609
35	0.867608	0.980962
36	0.84388	0.984171
37	0.83118	0.987324
38	0.827274	0.986948
39	0.817006	0.986377
40	0.806339	0.989312
41	0.790477	0.989262
42	0.76164	0.992264
43	0.735066	0.998102
44	0.709657	0.994747
45	0.682259	0.989158
46	0.646973	0.979746
47	0.624003	0.982022
48	0.596954	0.978265
49	0.574158	0.948097
50	0.563119	0.914588
51	0.551211	0.774392
52	0.543846	0.731201
53	0.525946	0.882969
54	0.511035	0.987178
55	0.488128	0.96972
56	0.485042	0.83562
57	0.471374	0.718963
58	0.476249	0.689271
59	0.47171	0.657219
60	0.457488	0.655358
61	0.452416	0.779572
62	0.444788	0.778537
63	0.439959	0.78752
64	0.450389	0.779485
65	0.443644	0.86061
66	0.446353	0.949362
67	0.430723	0.999527
68	0.406403	0.965902
69	0.40233	0.92866
70	0.389964	0.862642
71	0.376371	0.823031
72	0.383521	0.804724
73	0.374552	0.830123
74	0.359915	0.897373
75	0.369483	0.955127
76	0.372446	0.984125
77	0.386912	0.998159
78	0.377702	0.999998
79	0.375942	0.9995
80	0.375326	0.999961
81	0.369895	0.999695
82	0.37644	0.999385
83	0.378719	0.999713
84	0.379227	0.999294
85	0.395307	0.998155
86	0.401718	0.991663
87	0.420758	0.992397
88	0.434884	0.990991
89	0.45434	0.992618
90	0.46392	0.992833
91	0.46988	0.992906
92	0.465159	0.987383
93	0.459952	0.984182
94	0.474262	0.986272
95	0.487415	0.980171
96	0.489174	0.967851
97	0.490734	0.952662
98	0.48995	0.945433
99	0.50063	0.945558
100	0.503235	0.925972
101	0.515458	0.899483
102	0.503544	0.881679
103	0.509899	0.856515
104	0.516931	0.832497
105	0.526621	0.815148
106	0.530482	0.801778
107	0.533802	0.789657
108	0.533951	0.783403
109	0.5559	0.77157
110	0.582377	0.76973
111	0.58929	0.770226
112	0.593154	0.773743
113	0.591151	0.782925
114	0.580537	0.79201
115	0.574513	0.803947
116	0.577325	0.820648
117	0.579765	0.81613
118	0.588421	0.815796
119	0.597709	0.825492
120	0.614671	0.831451
121	0.61656	0.841079
122	0.618368	0.859842
123	0.625065	0.893107
124	0.631198	0.918608
125	0.650797	0.928342
126	0.658745	0.942528
127	0.670124	0.961276
128	0.66163	0.974901
129	0.669893	0.99408
130	0.672211	0.999456
131	0.679467	0.998326
132	0.672154	0.98885
133	0.667887	0.980118
134	0.667119	0.974401
135	0.660697	0.979487
136	0.661185	0.972952
137	0.656101	0.971891
138	0.636364	0.977802
139	0.627201	0.981518
140	0.615897	0.977598
141	0.625066	0.983788
142	0.624455	0.994676
143	0.637155	0.999875
144	0.618711	0.99823
145	0.625816	0.988594
146	0.611082	0.988333
147	0.614131	0.972967
148	0.599349	0.951865
149	0.575896	0.93128
150	0.539133	0.891731
151	0.529686	0.853975
152	0.512627	0.818662
153	0.509046	0.785321
154	0.493923	0.753623
155	0.480918	0.71663
156	0.489634	0.692532
157	0.467225	0.65628
158	0.449388	0.606106
159	0.457407	0.580565
160	0.464286	0.545062
161	0.485063	0.548937
162	0.514605	0.552262
163	0.535518	0.57543
164	0.524802	0.58754
165	0.51038	0.571155
166	0.48828	0.635018
167	0.467967	0.695467
168	0.437068	0.717294
169	0.421083	0.727292
170	0.389287	0.728536
171	0.397934	0.716829
172	0.359071	0.677817
173	0.397942	0.668965
174	0.387091	0.690556
175	0.395169	0.684134
176	0.363517	0.699869
177	0.428377	0.700068
178	0.425831	0.699509
179	0.48058	0.674333
180	0.492729	0.683416
181	0.587937	0.664287
182	0.633354	0.651636
183	0.661882	0.659221
184	0.652702	0.647288
185	0.632527	0.656202
186	0.67402	0.662729
187	0.705046	0.671018
188	0.683419	0.69682
189	0.680618	0.719588
190	0.658122	0.732527
191	0.625669	0.759684
192	0.582597	0.780248
193	0.569242	0.788808
194	0.568168	0.808947
195	0.589915	0.820624
196	0.600817	0.829991
197	0.613115	0.844951
198	0.632395	0.854963
199	0.637974	0.868627
200	0.645251	0.892548
201	0.661277	0.909595
202	0.680423	0.924755
203	0.703555	0.932758
204	0.715601	0.930752
205	0.731069	0.928705
206	0.756236	0.93023
207	0.754581	0.93337
208	0.768041	0.933557
209	0.783418	0.924849
210	0.76967	0.919882
211	0.751725	0.923608
212	0.741461	0.921708
213	0.697205	0.915588
214	0.702058	0.910704
215	0.671601	0.903764
216	0.649306	0.897292
217	0.65925	0.892512
218	0.631465	0.884823
219	0.624045	0.875166
220	0.607643	0.865692
221	0.629568	0.85749
222	0.669452	0.854599
223	0.71062	0.849411
224	0.783184	0.845071
225	0.784946	0.839042
226	0.848278	0.826199
227	0.848549	0.819212
228	0.858429	0.81276
229	0.85314	0.799269
230	0.841047	0.801718
231	0.877975	0.805344
232	0.930409	0.797847
233	0.987526	0.791241
234	0.999346	0.787868
235	0.976841	0.780541
236	0.900378	0.777023
237	0.9243	0.768835
238	0.831676	0.758923
239	0.765727	0.759074
240	0.630916	0.75625
241	0.616789	0.750542
242	0.689698	0.750469
243	0.581458	0.758543
244	0.69084	0.766634
245	0.729619	0.77519
246	0.943419	0.793827
247	0.953904	0.803139
248	0.906103	0.815988
249	0.774676	0.829571
250	0.729453	0.83238
251	0.659081	0.831165
252	0.546872	0.840133
253	0.610475	0.835636
254	0.707778	0.839187
255	0.686118	0.832164
256	0.560149	0.832859
257	0.518338	0.835039
258	0.463678	0.841469
259	0.488087	0.846966
260	0.416425	0.843228
261	0.379678	0.844975
262	0.304944	0.847312
263	0.39463	0.846902
264	0.360992	0.852495
265	0.423171	0.847146
266	0.514269	0.828923
267	0.658355	0.831702
268	0.62808	0.820737
269	0.730189	0.812515
270	0.726834	0.821347
271	0.781891	0.823727
272	0.872735	0.833267
273	0.992157	0.846018
274	0.996199	0.848076
275	0.999984	0.850559
276	0.999189	0.859396
277	0.989624	0.868662
278	0.971405	0.849305
279	0.97311	0.874029
280	0.970512	0.872274
281	0.971057	0.905784
282	0.954859	0.924873
283	0.914173	0.940679
284	0.870029	0.933956
285	0.857392	0.934172
286	0.8119	0.927402
287	0.812296	0.933216
288	0.816882	0.943079
289	0.828534	0.949431
290	0.821677	0.964064
291	0.859162	0.966251
292	0.895694	0.981577
293	0.923017	0.991048
294	0.947783	0.992349
295	0.951872	0.990625
296	0.914916	0.985741
297	0.878073	0.96343
298	0.887664	0.95637
299	0.982245	0.949528
300	0.78223	0.952373
301	-0.812276	0.967478
302	-0.394957	0.973554
303	-0.334483	0.976617
304	-0.265784	0.982077
305	-0.287626	0.976992
306	-0.100495	0.967638
307	-0.84471	0.96057
308	-0.756142	0.945952
309	-0.411222	0.914145
310	0.0247251	0.895995
311	0.100349	0.85832
312	0.271647	0.841271
313	0.420612	0.828192
314	0.476191	0.839436
315	0.680353	0.822968
316	0.858791	0.811119
317	0.917995	0.81114
318	0.912705	0.802828
319	0.886678	0.827483
320	0.879967	0.82767
321	0.901783	0.812382
322	0.916226	0.82761
323	0.921704	0.824318
324	0.939882	0.818119
325	0.93589	0.808619
326	0.959853	0.7912
327	0.958456	0.748513
328	0.939695	0.735376
329	0.95185	0.720424
330	0.95795	0.714879
331	0.964866	0.801798
332	0.976181	0.843757
333	0.995297	0.816945
334	0.999926	0.801417
335	0.999231	0.690482
336	0.999997	0.917828
337	0.998284	0.996634
338	0.99936	0.99451
339	0.993334	0.972268
340	0.993254	-0.2593
341	0.96812	-0.44763
342	0.959554	-0.427549
343	0.94845	-0.416249
344	0.941262	-0.403762
345	0.937089	0.000512948
346	0.946482	0.354553
347	0.943955	0.214227
348	0.946848	0.267001
349	0.952618	0.0827978
350	0.968173	-0.222347
351	0.954513	-0.390929
352	0.889559	-0.541139
353	0.902291	-0.627246
354	0.840745	-0.625985
355	0.820946	-0.565686
356	0.824054	-0.603501
357	0.772536	-0.563345
358	0.751691	-0.531972
359	0.727563	-0.510935
360	0.630093	-0.470238
361	0.586457	-0.448787
362	0.665202	-0.412631
363	0.735401	-0.404404
364	0.398148	-0.431743
365	-0.853898	-0.37756
366	-0.837233	-0.375935
367	-0.808294	-0.378693
368	-0.93032	-0.364127
369	0.673508	-0.291729
370	0.701899	-0.170944
371	0.77339	-0.114499
372	0.713284	0.00756606
373	0.684094	0.131361
374	0.306591	0.13262
375	0.621293	0.176593
376	0.697934	0.139051
377	0.576722	0.278979
378	0.60128	0.380674
379	0.713813	0.414153
380	0.888585	0.397648
381	0.824088	0.38737
382	0.998464	0.441914
383	0.999611	0.440629
384	0.982675	0.459819
385	0.987	0.481635
386	0.835323	0.461737
387	0.522383	0.456726
388	0.374557	0.468302
389	-0.281849	0.465092
390	-0.958379	0.368085
391	0.503239	0.232399
392	0.700352	0.232891
393	0.810374	0.200771
394	-0.717767	0.0190341
395	-0.847812	-0.180715
396	0.249477	-0.252967
397	0.93841	-0.319514
398	0.862111	-0.408605
399	0.699512	-0.499974
400	0.785146	-0.581698
401	0.719421	-0.590108
402	0.962119	-0.611765
403	0.996427	-0.638354
404	0.998021	-0.678243
405	0.977265	-0.708075
406	0.985158	-0.713411
407	0.888555	-0.71385
408	0.894171	-0.72047
409	0.815564	-0.704837
410	0.424941	-0.641459
411	0.722984	-0.63868
412	0.987299	-0.621532
413	0.917947	-0.620132
414	0.717843	-0.58119
415	0.597265	-0.652164
416	0.464314	-0.640941
417	0.344782	-0.658474
418	0.275922	-0.604016
419	0.166159	-0.487269
420	-0.100026	-0.456453
421	0.0523934	-0.569263
422	-0.240903	-0.507869
423	-0.315138	-0.516493
424	-0.334218	-0.48685
425	-0.179567	-0.457641
426	0.170509	-0.479742
427	0.00305506	-0.456946
428	0.325354	-0.541524
429	-0.220647	-0.566695
430	0.755895	-0.639894
431	0.649738	-0.673855
432	0.857919	-0.665932
433	0.358172	-0.713954
434	-0.67199	-0.697353
435	-0.531627	-0.660851
436	-0.631561	-0.763256
437	-0.752671	-0.854427
438	-0.809115	-0.919928
439	-0.712143	-0.943129
440	-0.585279	-0.980009
441	-0.691665	-0.949633
442	-0.616529	-0.9747
443	-0.766374	-0.348738
444	-0.865497	0.30576
445	-0.985439	0.558256
446	-0.998052	0.740542
447	-0.979426	0.687713
448	-0.969328	0.740525
449	-0.957091	0.706978
450	-0.872184	0.755543
451	-0.715128	0.863499
452	-0.431251	0.844985
453	-0.158707	0.879159
454	0.0554052	0.893227
455	0.327975	0.897784
456	0.0967507	0.946637
457	0.171626	0.957069
458	0.388531	0.970801
459	0.285683	0.995908
460	0.250861	0.99953
461	-0.124332	0.999952
462	-0.0704938	0.992754
463	-0.356088	0.952431
464	-0.386459	0.924787
465	-0.303185	0.843839
466	0.0905934	0.774746
467	0.170132	0.7101
468	0.0732014	0.691256
469	0.154365	0.673751
470	0.364506	0.663695
471	0.45691	0.671661
472	0.454088	0.667119
473	-0.416728	0.671032
474	-0.329874	0.643525
475	-0.26791	0.574864
476	-0.191719	0.574387
477	-0.169689	0.611717
478	-0.599685	0.670676
479	-0.559939	0.652813
480	-0.57773	0.645396
481	-0.659977	0.642747
482	-0.387405	0.660077
483	-0.661249	0.596788
484	-0.883688	0.586888
485	-0.863969	0.47625
486	-0.956716	0.520233
487	-0.929946	0.547724
488	-0.986043	0.510107
489	-0.879914	0.374538
490	-0.784732	0.315913
491	-0.737147	0.284422
492	-0.811529	0.0302954
493	-0.795592	-0.192379
494	-0.714986	-0.155377
495	-0.685897	-0.263974
496	-0.661247	-0.321684
497	-0.690344	-0.37369
498	-0.655823	-0.353981
499	-0.574629	-0.410177
500	-0.566825	-0.393489
501	-0.634618	-0.399787
502	-0.610879	-0.367842
503	-0.491466	-0.374535
504	-0.525151	-0.384564
505	-0.603234	-0.357671
506	-0.532201	-0.363925
507	-0.415984	-0.402472
508	-0.399708	-0.395832
509	0.181736	-0.356031
510	0.574985	-0.361248
511	0.807123	-0.253657
512	0.956199	-0.279774
513	0.967348	-0.144409
514	0.896787	-0.0661996
515	0.995244	-0.0170088
516	0.886207	0.232632
517	0.377746	0.633988
518	0.63385	0.902999
519	0.42081	0.885143
520	0.0375794	0.74281
521	0.160329	0.39752
522	0.765322	0.421883
523	-0.971908	0.371945
524	0.715853	0.384679
525	0.999997	0.359568
526	0.995291	0.249929
527	0.753002	0.204773
528	0.259739	0.233785
529	0.296237	0.225428
530	-0.693905	0.408905
531	-0.966542	0.509906
532	-0.976566	0.51956
533	-0.961833	0.478735
534	-0.993571	0.417771
535	-0.999164	0.490381
536	-0.994259	0.51763
537	-0.983766	0.562321
538	-0.980218	0.536848
539	-0.966341	0.534535
540	-0.864303	0.537469
541	-0.874929	0.527969
542	-0.904054	0.579654
543	-0.973723	0.545741
544	-0.935747	0.549649
545	-0.946745	0.475962
546	-0.958649	0.526463
547	-0.998621	0.465001
548	-0.975644	0.510864
549	-0.866033	0.49674
550	-0.824446	0.471205
551	-0.763981	0.462725
552	-0.664053	0.452798
553	-0.536159	0.483786
554	-0.463975	0.50079
555	-0.454159	0.416201
556	-0.521197	0.390155
557	-0.578051	0.349486
558	-0.654241	0.351287
559	-0.665732	0.41442
560	-0.614504	0.532867
561	-0.645669	0.614409
562	-0.524514	0.58422
563	-0.557021	0.522598
564	-0.558695	0.529682
565	-0.640915	0.430888
566	-0.943214	0.332731
567	-0.979255	0.36346
568	-0.999993	0.822175
569	-0.937197	0.107325
570	-0.912041	0.099227
571	-0.446557	-0.0672121
572	-0.447473	-0.265745
573	-0.260342	-0.339905
574	-0.851907	-0.305965
575	-0.983183	-0.48246
576	-0.735084	-0.59011
577	-0.794889	-0.668849
578	-0.778566	-0.703516
579	-0.964968	-0.643824
580	-0.970314	-0.670088
581	-0.877855	-0.682871
582	-0.782802	-0.728744
583	-0.874976	-0.686954
584	-0.862697	-0.68836
585	-0.832896	-0.750356
586	-0.720562	-0.669864
587	-0.71195	-0.639901
588	-0.710231	-0.47059
589	-0.676929	-0.37992
590	-0.719417	-0.36882
591	-0.727124	-0.322754
592	-0.709732	-0.31564
593	-0.738553	-0.303938
594	-0.711955	-0.269874
595	-0.755687	-0.282771
596	-0.683695	-0.281426
597	-0.796258	-0.355683
598	-0.892782	-0.484561
599	-0.947155	-0.406178
600	-0.920937	-0.515608
601	-0.936206	-0.547834
602	-0.993026	-0.774792
603	-0.995143	-0.81577
604	-0.894418	-0.693671
605	-0.728882	-0.602098
606	-0.134635	-0.568991
607	0.287818	-0.452017
608	0.443771	-0.383602
609	0.533344	-0.18746
610	0.585097	-0.0804902
611	0.67615	-0.0448315
612	0.730296	-0.0898975
613	0.740317	-0.212547
614	0.814106	-0.140733
615	0.778541	-0.502784
616	0.671893	-0.740725
617	0.762566	-0.54946
618	0.745688	0.520094
619	0.628264	-0.337987
620	0.648589	0.0323643
621	0.612432	-0.0158104
622	0.53379	-0.16285
623	0.467436	-0.206882
624	0.420821	-0.371817
625	0.394217	-0.394555
626	0.324217	-0.17617
627	0.332327	-0.0525536
628	0.346725	-0.188112
629	0.348036	-0.428654
630	0.326482	-0.815064
631	0.292909	-0.836714
632	0.324127	-0.991109
633	0.299521	-0.768742
634	0.312078	-0.501615
635	0.332402	-0.472439
636	0.407766	-0.435098
637	0.411851	-0.833121
638	0.434979	-0.917575
639	0.40774	-0.977777
640	0.438826	-0.955916
641	0.324041	-0.890194
642	0.360174	-0.809313
643	0.387646	-0.771771
644	0.366543	-0.908347
645	0.43384	-0.979531
646	0.394377	-0.969996
647	0.453169	-0.980061
648	0.498086	-0.989092
649	0.438327	-0.990412
650	0.376438	-0.999966
651	0.260507	-0.999218
652	0.177944	-0.995959
653	0.0161919	-0.988994
654	0.116728	-0.989383
655	0.0381818	-0.994654
656	-0.137746	-0.994005
657	-0.124562	-0.996856
658	-0.127534	-0.993928
659	-0.142051	-0.999634
660	-0.0642969	-0.987677
661	-0.0363871	-0.961038
662	-0.0804156	-0.91583
663	-0.19826	-0.912262
664	-0.257552	-0.908767
665	-0.287847	-0.935738
666	-0.309349	-0.931084
667	-0.364559	-0.971603
668	-0.319915	-0.975455
669	-0.255383	-0.988477
670	-0.298242	-0.998736
671	-0.38072	-0.982632
672	-0.367648	-0.998686
673	-0.413391	-0.985008
674	-0.534631	-0.967102
675	-0.576815	-0.945982
676	-0.604115	-0.975975
677	-0.623445	-0.986691
678	-0.674363	-0.990159
679	-0.712813	-0.969916
680	-0.686752	-0.811557
681	-0.731129	-0.749456
682	-0.821349	-0.582918
683	-0.869695	-0.639142
684	-0.863792	-0.711187
685	-0.892901	-0.77482
686	-0.888051	-0.846591
687	-0.900618	-0.831179
688	-0.920261	-0.928136
689	-0.939426	-0.898196
690	-0.932422	-0.958834
691	-0.943507	-0.934809
692	-0.931899	-0.882426
693	-0.94604	-0.864144
694	-0.964187	-0.918396
695	-0.977913	-0.894515
696	-0.990494	-0.739499
697	-0.997306	-0.545206
698	-0.99964	-0.509018
699	-0.999482	-0.724675
700	-0.998609	-0.72209
701	-0.995378	-0.654147
702	-0.992371	-0.358446
703	-0.977587	-0.256822
704	-0.981738	-0.242423
705	-0.983998	-0.2252
706	-0.976348	-0.48196
707	-0.963489	-0.642696
708	-0.923038	-0.783315
709	-0.915338	-0.776933
710	-0.892527	-0.838188
711	-0.832184	-0.817439
712	-0.86629	-0.991275
713	-0.825073	-0.975229
714	-0.678661	-0.96253
715	-0.638169	0.88994
716	-0.570696	0.971784
717	-0.585528	0.518336
718	-0.617202	0.465382
719	-0.53445	-0.301924
720	-0.470788	-0.0969155
721	-0.38531	0.117902
722	-0.305503	-0.64682
723	-0.216378	-0.124938
724	-0.1152	-0.466457
725	0.0612124	-0.583833
726	0.0921802	-0.646651
727	NaN	-0.708395
728	NaN	-0.730065
729	NaN	-0.774173
730	NaN	-0.794752
731	NaN	-0.916284
732	NaN	-0.999817
733	NaN	-0.899474
734	NaN	-0.606858
735	NaN	-0.306523
736	NaN	-0.124951
737	NaN	-0.0184979
738	NaN	0.0294283
739	NaN	0.346432
740	NaN	0.354105
741	NaN	0.35394
742	NaN	0.419119
743	NaN	0.38017
744	NaN	0.51378
745	NaN	0.461892
746	NaN	0.351937
747	NaN	0.364014
748	NaN	0.911532
749	NaN	0.884682
750	NaN	0.943735
751	NaN	0.998984
752	NaN	0.919061
753	NaN	0.865991
754	NaN	0.932331
755	NaN	0.949408
756	NaN	0.999912
757	NaN	0.988867
758	NaN	0.99959
759	NaN	0.995795
760	NaN	0.999366
761	NaN	0.996484
762	NaN	0.990895
763	NaN	0.975127
764	NaN	0.970441
765	NaN	0.980448
766	NaN	0.996959
767	NaN	0.999968
768	NaN	0.994726
769	NaN	0.913909
770	NaN	0.813595
771	NaN	0.534994
772	NaN	0.865127
773	NaN	0.967977
774	NaN	0.953334
775	NaN	0.915005
776	NaN	0.967974
777	NaN	0.942112
778	NaN	0.976268
779	NaN	0.939769
780	NaN	0.996296
781	NaN	0.999993
782	NaN	0.967344
783	NaN	0.873729
784	NaN	0.875283
785	NaN	0.800667
786	NaN	0.713773
787	NaN	0.618243
788	NaN	0.675193
789	NaN	0.60471
790	NaN	0.548318
791	NaN	0.508773
792	NaN	0.59457
793	NaN	0.585004
794	NaN	0.624823
795	NaN	0.651012
796	NaN	0.644651
797	NaN	0.75633
798	NaN	0.800831
799	NaN	0.537263
800	NaN	-0.0218046
801	NaN	-0.841521
802	NaN	-0.971171
803	NaN	-0.927538
804	NaN	-0.910139
805	NaN	-0.668468
806	NaN	-0.264519
807	NaN	-0.488243
808	NaN	-0.600896
809	NaN	-0.675429
810	NaN	-0.670617
811	NaN	-0.72208
812	NaN	-0.603956
813	NaN	-0.391319
814	NaN	-0.510047
815	NaN	-0.472871
816	NaN	-0.395492
817	NaN	-0.203872
818	NaN	-0.120004
819	NaN	0.0084781
820	NaN	0.170306
821	NaN	0.313062
822	NaN	0.306118
823	NaN	0.391874
824	NaN	0.360524
825	NaN	0.141339
826	NaN	0.295593
827	NaN	0.318441
828	NaN	0.284971
829	NaN	0.250758
830	NaN	0.293411
831	NaN	0.258513
832	NaN	0.281047
833	NaN	0.283614
834	NaN	0.306689
835	NaN	0.320353
836	NaN	0.407064
837	NaN	0.45205
838	NaN	0.5686

## Sheet: Supplement 3C
T (min)	Cell_Top	Cell_Bottom
0	-0.242055	-0.708594
2	-0.242055	-0.708594
4	-0.289336	-0.637969
6	-0.339379	-0.570001
8	-0.370744	-0.531093
10	-0.440634	-0.479427
12	-0.508176	-0.44061
14	-0.562812	-0.382567
16	-0.606109	-0.290022
18	-0.64208	-0.17779
20	-0.635146	-0.0998917
22	-0.604169	-0.0476451
24	-0.572383	-0.040503
26	-0.554333	-0.0873537
28	-0.54603	-0.174029
30	-0.544057	-0.205164
32	-0.54653	-0.193841
34	-0.54962	-0.173758
36	-0.550276	-0.169302
38	-0.548932	-0.176784
40	-0.545713	-0.193276
42	-0.540603	-0.216609
44	-0.534574	-0.232838
46	-0.528731	-0.231224
48	-0.522953	-0.214844
50	-0.517127	-0.213172
52	-0.511138	-0.224506
54	-0.501537	-0.228032
56	-0.484141	-0.203115
58	-0.458184	-0.148184
60	-0.386395	-0.0941035
62	-0.237	-0.0404037
64	0.00380907	0.023745
66	0.366102	0.110963
68	0.862588	0.222026
70	0.999706	0.344898
72	0.967468	0.463293
74	0.928586	0.567089
76	0.873778	0.661348
78	0.793792	0.750443
80	0.692907	0.838435
82	0.584798	0.893997
84	0.537939	0.919583
86	0.589581	0.929797
88	0.703461	0.932871
90	0.757289	0.933271
92	0.775835	0.931394
94	0.800675	0.927779
96	0.865587	0.923265
98	0.946159	0.918329
100	0.992569	0.912773
102	0.995955	0.907648
104	0.955614	0.899816
106	0.873572	0.886923
108	0.753621	0.870404
110	0.635912	0.856711
112	0.5321	0.845896
114	0.464374	0.838427
116	0.450737	0.833983
118	0.473087	0.831637
120	0.51471	0.829613
122	0.565985	0.827821
124	0.616267	0.824824
126	0.660482	0.819396
128	0.700177	0.812035
130	0.735194	0.80449
132	0.763561	0.796849
134	0.789787	0.793271
136	0.818849	0.797292
138	0.850661	0.807475
140	0.882618	0.803436
142	0.913387	0.786713
144	0.942371	0.765697
146	0.964903	0.750084
148	0.978953	0.74038
150	0.989033	0.732815
152	0.99581	0.726553
154	0.998629	0.723333
156	0.999094	0.725247
158	0.998466	0.731654
160	0.998677	0.73718
162	0.999434	0.742067
164	0.999934	0.742638
166	0.999971	0.735791
168	0.999704	0.723804
170	0.998194	0.714234
172	0.994072	0.707077
174	0.989498	0.701917
176	0.988562	0.698037
178	0.990986	0.69497
180	0.994461	0.69656
182	0.997783	0.701957
184	0.999329	0.712539
186	0.999529	0.729276
188	0.999052	0.75071
190	0.998222	0.769949
192	0.996897	0.785819
194	0.994995	0.796655
196	0.992557	0.802487
198	0.98964	0.80467
200	0.988951	0.801924
202	0.99034	0.79488
204	0.993047	0.784488
206	0.996202	0.771368
208	0.998909	0.755478
210	0.999062	0.749695
212	0.997249	0.752792
214	0.993156	0.754948
216	0.988757	0.750325
218	0.985053	0.740865
220	0.980555	0.743544
222	0.975195	0.754892
224	0.970544	0.768583
226	0.968407	0.78062
228	0.968704	0.791399
230	0.964448	0.794727
232	0.955603	0.792235
234	0.945731	0.786138
236	0.938912	0.778148
238	0.935171	0.768483
240	0.932126	0.761062
242	0.92991	0.755865
244	0.930512	0.752702
246	0.935224	0.751283
248	0.942576	0.751277
250	0.943311	0.745027
252	0.938615	0.733423
254	0.929534	0.720031
256	0.917009	0.708177
258	0.900239	0.697657
260	0.903846	0.702847
262	0.926082	0.721725
264	0.952068	0.747057
266	0.971442	0.773232
268	0.984679	0.800293
270	0.989511	0.810638
272	0.989853	0.806223
274	0.988717	0.801852
276	0.988498	0.811249
278	0.989102	0.831499
280	0.984795	0.865958
282	0.975002	0.9085
284	0.964084	0.940834
286	0.958562	0.955675
288	0.958053	0.959255
290	0.961501	0.967603
292	0.966804	0.978617
294	0.970862	0.987502
296	0.972589	0.992531
298	0.972866	0.995221
300	0.969812	0.991879
302	0.963874	0.978072
304	0.960299	0.959638
306	0.963767	0.957128
308	0.972294	0.970469
310	0.976073	0.981052
312	0.976466	0.988719
314	0.976602	0.993774
316	0.978936	0.996865
318	0.982965	0.998638
320	0.986394	0.99956
322	0.989312	0.999935
324	0.991431	0.999892
326	0.992574	0.998266
328	0.99294	0.992958
330	0.995011	0.987098
332	0.997738	0.983003
334	0.99952	0.979708
336	1	0.975356
338	0.999642	0.969699
340	0.999614	0.964939
342	0.999986	0.961095
344	0.999691	0.959829
346	0.99898	0.962525
348	0.998476	0.968098
350	0.998084	0.973874
352	0.997926	0.979725
354	0.997435	0.983795
356	0.995664	0.98491
358	0.991159	0.983572
360	0.984959	0.979075
362	0.977321	0.970268
364	0.976433	0.956542
366	0.988532	0.937879
368	0.99942	0.913015
370	0.999707	0.894084
372	0.999224	0.885087
374	0.999046	0.878503
376	0.997771	0.865388
378	0.994513	0.845038
380	0.984724	0.832751
382	0.964545	0.829072
384	0.93631	0.829645
386	0.90427	0.83015
388	0.867129	0.830604
390	0.856417	0.826942
392	0.87166	0.819869
394	0.900803	0.813435
396	0.93248	0.810843
398	0.96051	0.811332
400	0.971577	0.805003
402	0.974304	0.791477
404	0.974263	0.778698
406	0.975186	0.778008
408	0.976947	0.789862
410	0.982465	0.787961
412	0.990185	0.770581
414	0.99742	0.751672
416	0.999813	0.755049
418	0.990975	0.78803
420	0.991666	0.793682
422	0.999976	0.773562
424	0.981071	0.739082
426	0.948211	0.69007
428	0.92601	0.620889
430	0.940046	0.515006
432	0.972953	0.339929
434	0.996507	0.143794
436	0.993721	0.0499516
438	0.916193	0.0690071
440	0.798082	0.152226
442	0.687959	0.285676
444	0.601101	0.418777
446	0.562289	0.533972
448	0.578625	0.658251
450	0.597815	0.779946
452	0.616009	0.866763
454	0.62994	0.885897
456	0.63947	0.82833
458	0.646494	0.693425
460	0.714519	0.649476
462	0.828991	0.674525
464	0.922771	0.690829
466	0.959957	0.664762
468	0.968562	0.611501
470	0.981281	0.566249
472	0.992707	0.530036
474	0.997818	0.510134
476	0.998803	0.508894
478	0.998104	0.522254
480	0.999164	0.530989
482	1	0.535181
484	0.999312	0.518446
486	0.997673	0.467525
488	0.994892	0.387515
490	0.99454	0.3155
492	0.996846	0.251942
494	0.998406	0.2064
496	0.998161	0.184851
498	0.996096	0.18342
500	0.998111	0.197817
502	0.999929	0.227602
504	0.996164	0.257717
506	0.990806	0.273536
508	0.98659	0.274742
510	0.994525	0.268955
512	0.999847	0.255054
514	0.994982	0.252128
516	0.994338	0.28293
518	0.998077	0.349328
520	0.9997	0.383531
522	0.999999	0.383887
524	0.999836	0.384165
526	0.999554	0.412601
528	0.999225	0.476062
530	0.999514	0.37336
532	0.999959	0.0644722
534	0.999999	-0.180231
536	0.999808	-0.184858
538	0.997635	-0.0788282
540	0.993714	-0.0452301
542	0.988596	-0.0489948
544	0.98192	-0.0512452
546	0.973616	-0.0268983
548	0.964934	0.0136271
550	0.950154	0.0216536
552	0.929332	0.00832459
554	0.90191	-0.0455427
556	0.864732	-0.176026
558	0.813434	-0.424639
560	0.779432	-0.535323
562	0.766706	-0.491874
564	0.768556	-0.370016
566	0.778196	-0.273591
568	0.795797	-0.212059
570	0.796702	-0.222028
572	0.780623	-0.293073
574	0.758611	-0.399138
576	0.744809	-0.527303
578	0.739699	-0.69373
580	0.727862	-0.817174
582	0.711793	-0.875957
584	0.68639	-0.909258
586	0.645493	-0.943696
588	0.588447	-0.974645
590	0.528654	-0.986419
592	0.463865	-0.98903
594	0.385974	-0.993414
596	0.284947	-0.999673
598	0.156789	-0.995299
600	0.0168203	-0.991605
602	-0.117549	-0.994914
604	-0.236178	-0.9947
606	-0.354576	-0.979679
608	-0.493274	-0.928107
610	-0.61985	-0.879327
612	-0.714517	-0.848704
614	-0.760535	-0.814728
616	-0.758201	-0.753859
618	-0.71899	-0.672673
620	-0.695515	-0.636662
622	-0.684718	-0.636409
624	-0.680398	-0.635194
626	-0.677392	-0.599589
628	-0.675714	-0.525737
630	-0.694904	-0.501221
632	-0.734457	-0.523692
634	-0.792973	-0.561444
636	-0.858736	-0.597053
638	-0.916625	-0.633278
640	-0.929672	-0.604977
642	-0.905367	-0.517814
644	-0.875274	-0.435898
646	-0.930959	-0.422705
648	-0.986074	-0.471654
650	-0.9903	-0.498097
652	-0.982974	-0.503633
654	-0.971983	-0.496831
656	-0.962185	-0.48425
658	-0.952624	-0.464527
660	-0.944525	-0.473725
662	-0.938542	-0.515789
664	-0.936555	-0.61335
666	-0.939279	-0.779027
668	-0.945389	-0.943631
670	-0.93832	-0.998326
672	-0.918745	-0.985801
674	-0.891664	-0.933622
676	-0.864145	-0.862543
678	-0.837322	-0.79437
680	-0.81767	-0.755815
682	-0.804837	-0.737968
684	-0.806795	-0.744221
686	-0.830134	-0.778607
688	-0.870868	-0.829593
690	-0.893201	-0.838988
692	-0.900893	-0.809932
694	-0.895996	-0.759736
696	-0.87736	-0.748274
698	-0.838803	-0.793191
700	-0.795632	-0.909623
702	-0.743078	-0.997835
704	-0.670108	-0.968929
706	-0.54736	-0.913511
708	-0.2762	-0.878215
710	-0.00865022	-0.860033
712	0.00669574	-0.851993
714	-0.0127415	-0.844848
716	0.0642352	-0.832076
718	0.167093	-0.815954
720	0.245152	-0.789804
722	0.307439	-0.750365
724	0.371564	-0.680651
726	0.445958	-0.559348
728	0.523411	-0.383007
730	0.542736	-0.340234
732	0.525124	-0.411965
734	0.504212	-0.456768
736	0.501209	-0.38707
738	0.509429	-0.216603
740	0.504498	-0.143505
742	0.489843	-0.15344
744	0.47421	-0.181768
746	0.464963	-0.177299
748	0.461266	-0.138073
750	0.468043	-0.0414163
752	0.485548	0.0863086
754	0.491773	0.187361
756	0.464894	0.261251
758	0.402828	0.346762
760	0.329695	0.509332
762	0.252692	0.632238
764	0.193246	0.660082
766	0.163622	0.621573
768	0.159533	0.524045
770	0.13744	0.518497
772	0.093161	0.613553
774	0.0450797	0.772282
776	0.0243457	0.944028
778	0.0371442	0.936146
780	-0.0256979	0.483024
782	-0.169587	0.192474
784	-0.299859	0.113044
786	-0.321796	0.147899
788	-0.244146	0.214728
790	-0.36119	0.251722
792	-0.61394	0.284834
794	-0.784171	0.307368
796	-0.829672	0.296808
798	-0.818767	0.259044
800	-0.846859	0.261303
802	-0.88632	0.292209
804	-0.909961	0.32616
806	-0.916838	0.348002
808	-0.912857	0.362812
810	-0.921998	0.388888
812	-0.941578	0.419434
814	-0.95734	0.473518
816	-0.963404	0.570807
818	-0.963224	0.697665
820	-0.967589	0.777166
822	-0.97549	0.80727
824	-0.988489	0.802884
826	-0.999758	0.7724
828	-0.985443	0.720035
830	-0.921026	0.729166
832	-0.816757	0.785394
834	-0.74849	0.82238
836	-0.760505	0.795836

## Sheet: Supplement 3D
X_Cell 0	Y_Cell 0		X_Cell 1	Y_Cell 1
0	0		0	0
0.114452	0.027404		2.09076	0.815672
0.344968	0.683488		3.34651	2.27453
2.49699	6.0982		4.92144	2.85485
1.0349	4.37819		5.40987	3.63022
2.0682	5.92894		6.04822	4.4733
1.8667	4.64417		6.66401	4.43945
1.86186	7.64088		5.53722	5.63072
1.04135	2.66464		6.56245	5.37441
0.920452	6.14333		6.38513	5.65167
1.88604	6.78652		7.74405	5.97085
2.10205	7.98585		8.88373	6.54794
1.80544	4.76668		9.14488	7.52804
2.59048	8.84666		7.92298	7.80692
4.11221	10.6473		8.19702	7.93265
4.9569	8.94821		8.36144	8.38401
3.8559	8.44204		7.78274	8.5162
3.34812	8.87567		7.98262	7.70214
3.36747	7.29108		7.32009	8.57745
2.39221	8.48718		7.57962	9.16744
3.01122	11.6435		7.8859	9.97344
3.41099	10.6618		7.65861	9.4576
3.91716	10.9922		7.76017	10.6021
3.88653	12.2689		7.50064	10.9503
3.31911	13.9293		8.30664	11.0406
4.97463	14.9174		7.71342	11.5016
4.52972	14.8659		8.30825	11.8885
6.03049	17.5934		7.61992	12.9444
5.97568	18.0318		8.17123	13.5037
5.84995	17.6885		7.76823	13.8132
9.30608	20.74		8.32114	14.0389
8.3018	19.8244		9.06589	14.3823
8.99174	20.5417		9.10941	15.3865
10.4264	21.8313		9.11264	15.6831
11.1405	22.4197		9.03687	15.7799
12.6993	23.5868		9.24804	14.5676
14.5483	24.9086		8.54521	15.1028
15.4559	27.5878		8.49846	15.2334
15.156	28.4099		8.80636	14.2372
16.1119	28.1697		8.79507	14.0405
17.3338	29.3497		8.4501	14.4
20.6755	32.1804		8.76767	14.3742
22.842	31.3421		8.45333	14.3613
24.0075	32.0063		7.94716	13.5344
26.008	33.3474		9.07556	14.0566
27.4959	33.5022		8.98368	13.6843
29.2014	32.78		9.04332	14.2259
29.311	33.9487		8.80313	15.0029
30.6377	33.7408		8.974	15.0529
31.4018	34.3275		9.25933	14.4064
31.8112	35.8509		9.04977	14.3484
33.6811	36.7359		9.46566	14.2307
33.9939	37.3259		9.18034	14.8256
36.8535	37.5048		8.44527	15.1802
38.7364	38.6606		8.38079	15.6509
39.2441	37.537		7.8456	15.3301
41.3236	40.8819		7.73115	15.1818
40.6305	39.0265		7.51353	15.5687
43.279	42.6197		7.74405	15.7525
42.5375	41.0883		8.05355	15.3688
45.0215	41.0963		8.17929	15.4704
44.4622	41.7089		9.0675	15.6703
46.0516	42.1328		8.42109	15.3559
48.2294	43.4192		8.355	15.5284
49.5029	45.7647		8.65644	15.0126
53.0042	45.6663		8.87245	15.2995
52.3981	46.3692		8.7322	15.8443
54.7355	45.3552		9.18356	15.9765
54.866	44.1333		9.27867	16.3376
56.3974	46.7448		9.45277	16.8406
57.3485	46.1564		10.0782	16.9534
58.2206	46.2031		10.586	17.7723
58.2061	48.2246		10.8923	18.2817
60.4468	47.5476		10.4748	18.9507
61.4639	47.2429		9.58334	20.4111
59.8648	48.8533		8.6774	21.5186
61.1754	48.8339		8.49524	23.1999
62.2168	50.3718		7.4684	24.022
65.3892	49.6496		7.88913	25.2923
65.7454	50.3605		8.02615	25.3713
67.5202	51.1617		9.61558	25.1246
69.8576	51.642		8.43237	25.7372
69.1145	52.3819		8.46461	26.756
68.8469	51.9644		9.19162	27.4959
70.2413	52.4013		8.25666	28.2567
70.0027	53.6828		7.62315	29.98
72.0983	53.9246		5.3196	29.7398
71.3487	54.7661		8.05355	30.3266
74.3003	55.9557		7.23304	30.9407
74.6195	56.8133		8.15027	31.9015
75.98	56.9068		7.69891	32.1578
76.8634	57.1841		7.49902	33.4683
77.3099	56.5232		5.52594	33.2427
77.4614	56.5054		6.1256	33.9213
77.0117	57.903		7.58607	33.5296
78.6124	58.8267		5.18742	35.0965
79.2524	58.3625		3.83817	35.3318
80.0729	58.8251		3.13856	36.2474
81.7623	59.5989		4.40721	35.8799
82.212	60.8046		4.9569	37.1776
83.8885	61.2415		2.00694	37.6402
84.2915	62.357		0.275652	39.2087
85.3232	61.0432		0.89466	39.3215
86.6611	63.2517		-0.414284	39.6842
88.5826	64.5751		-0.722176	39.8438
89.4483	65.502		-0.752804	40.4805
90.3091	65.66		-0.109616	39.8728
91.452	66.3999		-0.39494	40.2597
92.6964	66.9238		-0.833404	41.3978
91.0522	68.1731		-1.02846	40.8997
93.2558	70.6266		-1.41695	42.3505
95.4111	70.5314		-1.5185	42.7035
95.7721	70.5927		-1.48626	42.9985
97.9983	71.5938		-1.59427	43.7932
98.7189	70.9973		-1.59266	43.9157
99.4298	71.8485		-1.86992	44.7314
100.239	73.3815		-1.41211	44.8442
101.857	74.5453		-3.04184	44.949
102.386	75.785		-2.87097	45.1167
102.878	76.4378		-3.18209	46.6787
103.916	78.4996		-2.93062	46.0516
104.529	77.3002		-2.6195	46.071
105.075	77.7564		-2.19393	46.5739
106.988	79.9891		-1.21545	47.0656
107.798	80.7306		-1.48304	47.3041
107.856	82.9197		-2.29226	47.0478
110.585	84.0594		-1.81511	46.9382
110.536	84.8234		-1.27026	46.9011
111.446	82.7488		-1.6394	47.8345
111.044	84.8331		-0.307892	48.0344
112.653	85.5424		-0.938184	48.1778
112.613	86.3339		-0.494884	48.9049
114.855	86.2904		-0.319176	48.3084
115.076	86.8014		-0.762476	49.1741
116.285	88.3183		-1.09938	49.0241
116.066	87.2914		-1.80866	49.7028
115.619	87.7573		-0.954304	49.4836
117.091	88.3231		-1.22834	49.9365
118.727	87.8347		-1.8006	49.6722
118.089	88.336		-1.69099	49.7318
120.536	89.9496		-1.21061	49.4529
120.634	92.1129		-1.8538	49.6029
120.287	90.9055		-2.28743	50.641
120.852	92.7883		-2.95802	51.2938
123.268	91.61		-2.27614	51.3696
123.047	93.8329		-2.9419	50.6958
124.604	92.9189		-2.06336	51.6307
123.123	93.3493		-3.32233	52.4577
125.098	93.2107		-3.60121	52.3803
126.299	93.1672		-3.69148	52.577
126.536	92.0355		-4.80215	53.0445
126.618	93.9441		-4.7683	52.7591
125.341	92.5594		-4.99075	52.9703
125.899	93.733		-5.38247	53.3201
127.142	93.7314		-5.4276	53.1879
127.923	94.2198		-5.44856	52.8123
126.155	94.3842		-5.87896	53.5651
126.468	93.0205		-6.76718	53.7715
127.23	93.6314		-6.38836	52.7817
130.142	96.1703		-6.46412	53.441
128.401	95.2773		-6.42382	53.0461
129.766	96.6426		-5.65651	53.5071
130.092	97.389		-6.28358	53.9133
131.739	98.2659		-6.45445	54.542
131.357	96.6587		-5.77096	53.8472
133.253	97.5486		-6.8639	53.9827
133.96	97.4341		-6.24489	55.3867
133.899	97.2923		-5.89186	55.2868
134.912	97.152		-6.71882	55.261
133.385	96.9054		-6.56568	54.8451
133.654	96.3234		-7.28624	55.3883
135.131	98.4561		-7.8311	55.5834
134.133	96.2332		-7.99068	54.9321
134.112	98.9429		-8.15511	55.7349
135.332	97.8323		-8.27923	56.6328
134.895	98.2611		-8.06161	55.7575
133.978	96.6523		-8.60486	56.8778
134.383	99.5716		-9.86383	57.7435
134.191	97.7098		-10.6553	58.493
133.685	98.8849		-11.3259	58.1271
135.205	98.7205		-11.4581	59.4086
135.547	101.187		-12.1496	58.8541
136.001	100.719		-11.9933	58.8106
137.147	101.485		-11.8595	59.5215
136.57	99.8038		-13.1475	59.7649
138.511	100.99		-12.7638	60.3533
137.647	102.538		-13.5601	61.0271
138.595	103.505		-14.0163	61.6203
140.671	103.189		-13.6875	62.5053
139.698	103.004		-14.5934	63.6353
142.303	104.213		-15.1367	63.9094
142.454	103.411		-14.9545	65.1877
143.7	103.378		-15.2237	65.5488
143.16	104.134		-15.5606	65.2135
143.607	104.98		-15.6332	66.8013
143.876	106.516		-16.1119	66.9979
144.627	106.702		-16.0684	66.9431
144.99	107.235		-15.5461	67.1462
144.197	107.271		-16.0362	67.5734
145.172	107.325		-15.8282	68.0409
146.244	108.417		-15.1254	68.9565
145.296	108.365		-15.4994	69.3305
146.112	109.545		-15.4188	69.5111
144.927	109		-16.5681	71.2649
146.334	109.755		-17.782	71.9113
146.698	110.596		-17.7723	71.7662
146.088	111.041		-17.6691	72.4513
147.003	109.969		-17.7239	73.1671
145.855	109.935		-18.1817	73.6088
147.18	111.845		-19.2618	73.699
147.646	110.03		-19.3247	74.5695
149.677	111.995		-18.7927	75.4448
148.228	110.767		-19.6374	76.0864
150.342	110.667		-20.5272	76.9343
147.774	110.928		-20.6368	77.2406
150.142	111.262		-21.3429	78.074
149.916	111.341		-21.2171	77.6807
148.265	111.346		-21.2429	77.9305
148.797	110.272		-21.6927	78.1207
149.94	111.945		-22.0586	78.311
150.479	112.024		-22.4729	78.9284
151.144	113.835		-23.1112	80.0422
149.126	112.98		-22.8872	80.2937
149.56	113.583		-23.6158	81.0868
148.138	113.588		-23.2547	80.5291
149.947	112.94		-23.864	81.1997
148.575	114.03		-24.562	81.327
150.375	113.904		-24.7378	82.0911
149.853	113.596		-24.5814	81.8364
150.148	113.312		-26.0306	83.0148
150.354	113.33		-25.8807	84.2334
149.294	113.751		-26.058	84.6477
148.741	113.799		-26.6335	84.3044
148.157	115.321		-27.6942	85.6665
147.875	115.355		-27.6265	85.789
147.638	114.702		-28.6565	86.624
147.67	112.443		-28.7468	86.99
149.671	114.442		-29.4786	87.3414
147.745	113.752		-29.7672	87.3768
148.112	114.133		-29.9381	88.4101
147.319	113.827		-30.6022	88.8889
148.451	114.347		-30.765	88.747
147.98	115.959		-30.6248	89.0485
147.15	114.128		-30.7699	89.9899
149.405	115.177		-31.089	90.4912
149.278	114.318		-31.8015	91.5358
150.977	114.847		-31.4001	92.2902
151.48	114.523		-31.8676	92.237
149.893	115.443		-31.542	92.3789
151.347	115.809		-32.298	93.82
150.358	115.427		-32.6108	93.2026
150.93	115.453		-33.9487	94.7421
150.164	114.209		-33.1153	94.8162
150.532	116.322		-34.0583	94.6437
149.656	116.369		-33.586	94.8936
150.448	115.584		-34.392	94.8452
151.019	114.689		-34.9401	96.5056
150.54	115.221		-35.2206	97.1311
150.959	115.305		-35.8702	98.7447
150.678	115.827		-36.0024	99.0235
149.929	114.658		-36.8632	99.2025
150.412	115.184		-36.7085	99.6587
150.401	114.981		-36.5166	99.483
150.256	115.754		-36.9132	99.7667
150.846	115.414		-36.8003	100.437
150.093	115.53		-37.9981	100.922
150.94	116.112		-38.8702	100.471
150.575	116.401		-37.7708	101.182
151.446	116.112		-38.6138	100.845
151.08	116.997		-38.8863	101.427
151.652	116.741		-37.8578	101.659
150.393	116.138		-38.4639	101.962
150.701	117.458		-37.9287	101.909
148.878	117.871		-38.1657	102.681
150.656	118.651		-38.6993	102.588
150.066	117.487		-39.2973	103.613
150.986	118.501		-39.0878	103.958
151.878	118.885		-38.7106	103.484
152.332	119.544		-40.408	103.64
151.407	119.823		-39.0265	105.352
151.691	119.98		-39.789	104.388
151.58	120.207		-38.1705	105.188
152.471	119.668		-38.5365	104.886
154.183	120.929		-38.8653	105.738
153.973	119.867		-40.5079	106.619
153.248	120.6		-40.1791	106.777
154.81	120.782		-41.1576	108.057
153.732	121.504		-39.8906	106.842
153.985	122.125		-39.3844	106.365
152.966	121.169		-40.1195	108.077
153.503	120.898		-39.2554	107.748
151.747	120.803		-40.2597	108.581
152.237	121.88		-38.933	108.615
151.879	120.837		-38.8879	108.062
152.176	121.69		-39.8228	108.794
152.41	120.2		-40.1598	108.152
153.39	119.672		-40.5853	108.665
152.979	119.699		-41.8669	108.654
152.344	120.092		-40.8255	108.992
151.341	120.126		-41.1882	110.098
153.088	118.829		-40.9658	110.956
151.322	118.758		-40.1501	111.268
150.704	120.323		-40.1727	109.874
151.347	120.312		-40.5241	110.693
152.313	120.753		-40.3081	110.881
151.842	120.3		-41.2833	111.618
151.617	121.081		-41.8588	112.498
154.339	118.648		-42.0023	113.258
151.613	120.047		-42.9131	114.104
151.428	121.264		-43.948	113.475
150.807	121.625		-43.445	113.727
150.401	120.939		-44.1398	112.821
150.032	121.925		-43.7932	113.756
151.03	122.062		-43.503	113.457
150.564	121.83		-42.9791	114.346
152.074	122.831		-43.7835	113.665
152.457	123.403		-43.5659	113.585
151.691	123.429		-42.8792	113.28
150.314	123.95		-43.6755	113.946
149.368	124.369		-42.5713	114.022
150.027	123.874		-43.6659	114.492
150.767	124.332		-44.114	114.402
150.512	124.795		-43.848	115.36
150.193	125.025		-44.3413	115.306
150.906	124.985		-44.467	115.327
149.714	125.681		-44.2558	114.858
151.836	123.834		-44.3445	114.668
150.169	125.331		-45.3133	115.029
149.218	125.412		-44.4396	114.821
150.78	125.064		-44.9958	115.358
150.57	125.04		-43.8609	114.388
150.379	126.029		-43.121	115.443
150.582	126.811		-44.056	115.835
151.989	125.533		-44.3687	114.645
151.879	127.05		-43.9899	114.437
149.905	126.764		-44.4058	114.015
151.022	127.451		-42.7099	115.276
151.394	125.751		-43.2645	114.779
149.515	126.705		-44.1688	114.681
149.424	128.117		-44.3848	115.144
150.213	128.504		-41.9539	113.187
148.181	128.302		-42.6019	113.865
149.262	128.652		-43.2032	114.629
149.434	127.562		-44.0495	115.002
149.216	128.7		-43.8093	114.89
149.389	128.491		-43.1226	115.877
150.722	126.279		-43.9093	115.867
149.54	128.412		-43.3547	114.707
150.059	127.422		-42.6277	115.398
150.266	127.014		-42.4891	114.508
150.437	127.18		-42.3086	113.559
149.3	128.692		-42.5197	113.659
148.423	128.317		-41.0834	112.353
149.249	129.363		-41.4139	112.258
147.679	129.537		-40.3081	112.318
149.637	127.527		-40.2807	113.553
148.18	130.193		-40.2823	111.779
149.194	127.516		-40.2307	113.332
148.185	129.36		-40.5692	113.494
148.86	128.489		-40.4225	113.267
147.069	129.086		-39.9131	113.406
149.461	127.743		-41.0222	113.712
149.444	128.968		-40.4225	113.646
149.773	128.509		-40.4273	113.275
150.301	126.329		-40.4193	112.788
150.919	126.939		-41.1108	114.096
149.855	127.43		-40.1098	113.09
150.38	126.929		-39.7503	112.898
148.011	129.149		-39.4666	112.971
146.648	131.708		-38.9201	113.441
148.323	129.353		-38.817	114.073
148.883	129.22		-39.6552	113.715
148.73	128.467		-40.2533	114.289
148.252	129.123		-38.6138	114.41
148.133	127.446		-38.3334	113.619
148.942	129.834		-37.5048	114.186
148.049	129.868		-38.2753	113.303
149.276	127.674		-39.2022	114.887
148.531	128.999		-37.6579	115.231
149.324	128.667		-38.0368	114.562
148.446	130.416		-37.0889	114.415
147.553	129.956		-35.9234	114.936
150.593	129.426		-37.2453	115.358
149.004	129.186		-36.3845	115.031
149.195	128.923		-37.3017	114.918
147.796	129.782		-37.1099	115.097
148.243	127.767		-37.45	114.292
148.333	128.554		-37.4774	114.486
147.34	129.378		-36.7278	115.087
149.089	127.786		-37.0518	114.744
150.271	128.383		-35.6075	114.313
147.451	130.44		-35.8557	113.623
148.31	129.676		-35.485	114.958
149.029	128.873		-35.7106	114.547
149.56	127.928		-33.8713	113.004
148.757	128.617		-35.1545	112.16
149.515	130.082		-33.8133	112.921
146.657	131.196		-34.8788	113.009
147.74	129.853		-33.3877	111.812
150.975	127.72		-33.981	111.459
148.697	129.448		-35.2706	111.984
149.136	129.486		-33.0879	111.805
148.427	130.875		-32.7091	111.096
147.706	130.616		-33.7472	111.61
148.728	129.437		-33.831	111.138
147.975	130.561		-34.6483	112.058
148.736	129.726		-33.4087	111.5
147.005	130.561		-33.3668	111.587
148.385	130.055		-33.9697	112.028
147.64	129.871		-33.2072	111.828
150.885	126.531		-33.5264	113.138
149.389	130.543		-33.6972	112.11
148.161	131.207		-33.2588	111.971
147.306	129.8		-33.0009	111.55
147.253	130.022		-32.0111	111.354
147.072	130.298		-32.2303	109.856
146.703	130.093		-33.4651	112.063
145.976	130.098		-32.722	110.999
148.547	129.342		-32.24	111.621
146.455	129.656		-32.1836	112.31
148.012	128.517		-32.398	111.578
146.61	130.572		-30.7231	109.01
149.121	128.696		-30.9665	111.093
148.325	129.708		-30.1831	109.8
148.033	129.819		-29.6801	110.127
146.555	129.876		-30.5667	110.733
145.834	131.067		-30.0477	109.663
147.279	129.17		-30.5281	110.633
147.232	131.206		-31.2019	109.229
148.802	128.164		-30.8021	109.826
149.205	130.566		-30.5329	108.623
146.421	130.778		-31.4969	110.001
148.006	130.106		-29.6818	109.161
148.462	128.92		-30.1702	108.381
149.344	127.988		-30.146	109.669
148.938	129.474		-29.0644	109.111
147.774	129.25		-31.3147	108.302
148.43	128.218		-32.0272	109.144
149.068	127.324		-31.8709	109.545
151.367	127.177		-31.1648	109.689
148.372	130.859		-31.5839	110.132
148.692	127.603		-30.4426	110.291
149.394	129.221		-32.0707	110.445
147.778	127.664		-31.8257	110.67
146.776	129.611		-31.6323	110.728
146.834	128.741		-32.0514	111.08
147.406	128.326		-30.9423	110.852
149.284	128.8		-32.988	111.346
148.317	129.469		-31.5984	111.038
148.738	127.869		-32.4592	110.907
145.639	128.538		-31.7209	111.288
147.701	129.427		-31.0439	112.086
146.718	129.06		-32.4963	111.679
146.884	129.474		-31.5468	111.72
147.59	129.571		-32.4641	113.04
147.619	129.932		-32.4383	112.75
147.78	128.07		-31.3502	113.906
146.605	129.292		-32.1384	113.98
147.235	130.001		-31.671	113.741
146.908	128.721		-30.0364	113.228
147.438	128.837		-31.0165	112.79
147.111	127.524		-31.2212	111.812
147.413	129.065		-30.5168	112.677
146.202	127.421		-29.5012	113.235
147.487	128.704		-29.9058	114.234
147.053	129.024		-28.044	114.507
147.975	130.009		-28.7855	113.467
146.653	129.132		-27.8441	114.379
147.182	128.621		-28.2535	114.908
145.851	129.25		-28.6404	114.454
147.395	129.511		-28.6323	114.6
147.295	129.131		-28.4824	115.221
146.181	129.397		-29.2014	114.242
148.217	126.99		-28.6307	114.976
146.621	128.85		-28.447	114.338
145.212	128.465		-27.8473	113.883
145.855	128.871		-28.3696	114.786
146.305	128.823		-28.7516	115.235
147.384	127.251		-28.6597	115.845
145.871	128.309		-27.8102	115.144
145.586	127.804		-28.2293	114.96
146.079	127.533		-27.5974	115.571
144.745	129.458		-28.1713	115.447
147.071	126.927		-26.7608	115.229
147.672	127.179		-27.454	115.448
145.606	127.263		-26.6996	114.492
147.438	127.696		-26.9607	116.254
146.12	128.43		-28.6211	115.063
148.831	125.736		-27.3202	115.153
148.543	127.869		-26.9543	114.442
148.604	126.948		-26.3933	115.231
147.788	127.425		-27.7022	114.973
147.322	125.831		-26.2563	113.815
148.659	125.668		-26.0967	113.577
149.128	126.868		-26.0757	115.15
148.518	126.658		-26.0128	113.999
147.788	127.296		-25.9065	114.181
147.311	126.876		-25.8855	114.099
148.244	126.948		-24.259	114.096
149.482	126.65		-22.6986	112.469
149.984	125.562		-22.892	113.432
147.28	126.41		-24.1204	113.619
147.524	127.454		-23.611	114.089
149.018	127.259		-22.8823	113.187
149.656	125.555		-25.0005	113.968
148.428	125.713		-23.8221	114.097
149.239	126.714		-23.2031	113.364
148.917	127.306		-23.806	113.054
148.19	126.832		-23.395	113.54
146.144	128.936		-22.8372	113.836
147.882	127.3		-24.151	113.741
148.249	127.322		-23.2338	114.789
148.335	128.296		-25.8871	114.102
148.343	127.059		-23.6045	114.712
146.677	126.916		-24.475	114.375
149.515	127.082		-23.0452	114.101
148.842	126.315		-26.3417	114.578
149.473	126.507		-25.4116	113.994
149.176	128.099		-25.2842	114.77
149.668	126.853		-25.1037	115.869
149.299	125.888		-26.3578	115.458
146.945	127.037		-28.4889	113.86
148.015	127.38		-26.8059	115.485
148.222	126.049		-26.3997	114.487
147.758	128.012		-27.5491	115.6
149.136	127.253		-27.0268	114.894
148.349	128.152		-27.2557	113.733
149.697	126.531		-26.7302	114.244
148.947	126.39		-25.1214	114.708
148.454	127.029		-27.7457	114.934
149.313	125.349		-26.7656	116.993
148.375	124.371		-26.3707	116.228
146.792	125.721		-28.5566	116.452
148.12	126.012		-28.3357	115.493
150.495	123.441		-28.3196	115.044
148.215	125.339		-28.0907	116.931
148.947	127.229		-27.7522	116.206
147.367	127.061		-27.8263	116.625
148.272	125.159		-27.5652	115.34
148.667	127.641		-28.7178	116.417
147.18	125.17		-27.2509	115.561
147.685	124.595		-28.4889	116.178
148.154	124.828		-28.4212	116.98
149.01	123.995		-29.2288	116.404
147.492	125.581		-28.4582	116.367
148.36	125.267		-29.1965	115.824
148.086	124.179		-29.3303	117.365
149.714	126.545		-30.1138	116.419
149.84	123.9		-28.7678	116.98
151.422	123.27		-29.8252	116.872
149.922	124.319		-29.3448	116.432
151.033	123.565		-29.743	116.823
151.565	124.329		-31.0552	117.46
152.937	124.33		-29.4996	117.165
150.912	125.096		-29.5625	117.051
150.941	124.188		-30.6586	116.465
152.676	121.858		-31.2164	117.225
151.301	122.419		-30.4475	116.683
150.806	121.977		-31.1519	117.36
150.819	123.337		-30.5087	117.815
151.433	124.258		-30.2057	118.451
148.275	125.217		-30.0493	118.111
151.341	124.82		-29.9348	116.665
152.361	122.414		-30.8601	117.038
150.678	123.842		-29.44	116.757
149.544	123.863		-30.9843	116.978
147.751	124.076		-29.7269	116.49
150.562	122.291		-28.7935	116.704
149.89	122.151		-28.2696	117.549
149.034	123.676		-28.4308	116.639
150.25	123.484		-26.9897	117.458
148.659	125.094		-28.8661	116.377
150.533	123.571		-28.2068	115.719
150.991	124.227		-27.8102	115.924
151.123	122.538		-28.268	116.852
151.76	121.598		-28.642	115.01
148.684	124.682		-28.937	115.41
150.38	123.136		-28.7984	115.35
149.582	122.459		-28.3954	115.385
150.516	120.186		-28.7436	117.081
152.984	121.741		-28.8226	116.038
152.431	122.164		-28.937	116.295
153.406	120.992		-29.1272	116.128
150.238	120.974		-28.4325	116.322
152.081	120.774		-28.4405	115.945
152.473	120.964		-29.066	116.025
154.712	120.953		-27.7989	115.937
156.609	116.926		-27.7071	115.579
154.194	119.253		-26.2708	115.908
153.022	121.593		-26.5932	115.938
153.693	118.343		-26.1063	115.263
153.092	119.988		-27.167	116.056
155.392	118.546		-27.2235	115.759
155.363	116.701		-27.6651	115.946
154.381	120.01		-28.0021	116.198
153.171	118.408		-27.6958	115.804
155.344	120.516		-27.9553	115.961
150.206	119.786		-27.4491	115.447
151.188	119.267		-27.9779	115.406
152.527	117.671		-27.2638	115.958
154.494	118.714		-27.6555	115.405
152.755	120.004		-27.5491	115.635
151.409	120.021		-28.1004	115.245
152.231	121.329		-27.1832	114.948
152.013	119.628		-26.8704	115.696
152.505	119.923		-27.051	115.711
151.064	120.797		-27.3685	115.706
149.174	122.086		-27.3089	115.896
149.371	122.497		-25.9967	115.192
149.286	122.954		-24.9538	115.737
152.589	120.678		-25.8242	115.959
150.271	123.56		-25.5566	115.709
151.946	121.808		-26.5351	115.31
149.083	123.868		-27.0494	114.958
153.593	121.014		-27.6539	115.998
150.08	121.758		-27.6297	114.67
148.394	121.364		-27.4056	115.108
150.956	124.048		-27.5491	116.498
149.026	123.271		-27.8328	116.132
147.172	121.717		-28.1907	114.655
148.136	124.348		-29.0353	116.161
146.992	123.603		-26.9365	115.385
145.933	122.736		-28.3422	114.94
144.751	123.237		-26.5738	115.476
145.462	122.97		-28.8129	114.404
144.998	123.499		-27.1493	115.398
145.873	121.761		-28.2019	115.975
144.151	124.282		-27.1219	115.858
144.48	124.409		-27.7296	115.029
143.139	124.591		-26.9607	114.947
144.743	123.312		-26.6093	114.94
144.682	122.955		-27.4959	115.169
145.593	124.295		-26.9462	114.558
142.843	123.86		-28.6888	115.194
144.148	124.287		-28.3309	115.595
143.249	124.812		-28.123	115.047
144.854	125.589		-27.4943	115.413
141.135	125.705		-26.9478	114.431
142.32	125.715		-27.8602	113.801
142.107	124.556		-27.0897	115.013
144.422	124.861		-26.2692	114.607
141.651	122.975		-26.4916	113.96
143.903	124.959		-26.3498	114.307
141.464	125.794		-26.4787	114.163
142.594	124.509		-28.0569	113.688
142.683	125.944		-28.1423	113.67
141.43	124.835		-26.8994	113.583
141.24	126.505		-27.2799	113.156
141.877	126.126		-27.3605	112.761
141.247	124.745		-27.2057	113.124
141.269	124.677		-28.2664	111.415
139.765	124.39		-27.6829	111.604
140.823	124.338		-27.9537	112.244
142.367	123.336		-28.1649	112.113
140.194	126.083		-27.6184	112.058
139.931	124.414		-27.059	113.274
139.559	123.123		-27.5426	112.855
138.742	124.762		-27.3153	112.14
138.809	124.604		-27.7989	112.057
139.203	124.493		-26.4739	112.182
137.539	125.554		-26.3433	111.555
136.57	125.094		-26.2272	111.799
136.557	123.971		-25.9532	111.807
138.717	122.741		-26.2869	110.495
136.214	122.899		-25.634	109.132
136.762	123.321		-27.2089	110.456
137.175	123.518		-26.2659	110.33
135.766	122.227		-28.3019	111.45
133.67	123.482		-27.0058	111.065
134.114	124.425		-27.5878	111.844
133.556	121.888		-27.5716	109.805
134.336	120.713		-25.8065	110.299
133.933	122.855		-27.8924	110.793
134.42	121.413		-28.6759	109.808
134.626	118.85		-28.0746	109.347
133.482	119.928		-28.0472	109.8
132.427	119.362		-26.8462	108.27
131.607	118.764		-26.9011	109.216
133.965	118.943		-27.0574	109.869
132.698	117.897		-27.8183	111.194
130.812	119.299		-29.8059	110.575
133.428	118.111		-28.2825	110.08
135.732	117.304		-28.397	111.073
134.402	117.279		-28.2229	109.1
131.476	116.802		-28.1955	108.708
133.18	116.017		-27.5862	109.182
131.928	117.123		-27.5539	108.841
131.159	113.372		-27.9408	109.78
132.439	114.215		-27.2654	108.283
132.679	113.709		-28.6984	108.639
131.044	114.674		-27.2122	108.357
131.715	112.297		-28.6614	108.47
129.634	112.036		-28.7017	109.424
131.789	111.428		-28.5663	108.638
132.455	110.329		-27.6136	108.463
132.651	109.83		-28.1536	109.505
133.593	109.971		-28.8758	109.898
133.553	107.835		-28.9338	109.626
133.375	105.936		-28.7758	108.905
134.415	105.625		-27.2122	108.773
133.308	106.319		-28.7855	108.446
134.526	105.422		-28.721	108.941
134.207	105.151		-29.5528	109.518
137.068	105.476		-29.9864	108.903
133.659	101.292		-29.0918	108.878
133.817	101.353		-29.8462	108.728
135.88	103.023		-29.0192	107.259
136.918	102.68		-28.4631	107.798
140.357	103.761		-28.0601	108.128
136.564	102.496		-29.4351	107.915
138.047	102.991		-28.3373	108.507
140.865	104.101		-29.1288	108.373
135.942	98.7511		-27.2734	107.922
139.385	103.476		-28.8322	109.542
142.809	107.951		-28.5034	109.872
139.588	103.387		-29.037	109.621
147.735	99.1025		-28.6775	108.825
145.889	96.3621		-27.9489	108.33
144.948	95.324		-29.153	108.367
147	102.286		-28.1358	108.288
146	102.165		-28.8161	108.758
147.919	102.934		-27.7683	108.833
149.426	102.731		-28.397	107.137
151.138	103.589		-28.8629	109.556
155.111	104.756		-26.4223	107.009
151.849	110.902		-28.4179	107.888
152.842	104.277		-26.6061	106.532
NaN	NaN		-27.3057	106.671
NaN	NaN		-27.6248	107.248
NaN	NaN		-28.1165	107.358
NaN	NaN		-27.9714	107.472
NaN	NaN		-29.2981	107.246
NaN	NaN		-30.0928	108.228
NaN	NaN		-30.088	107.948
NaN	NaN		-30.0815	108.517
NaN	NaN		-30.0445	108.602
NaN	NaN		-29.8043	108.475
NaN	NaN		-29.3094	108.357
NaN	NaN		-29.2675	108.135
NaN	NaN		-29.5189	109.697
NaN	NaN		-30.2846	108.584
NaN	NaN		-29.0789	108.086
NaN	NaN		-29.4319	108.638
NaN	NaN		-30.0106	108.27
NaN	NaN		-29.5866	109.248
NaN	NaN		-29.1917	107.846
NaN	NaN		-29.2368	107.659
NaN	NaN		-27.9843	107.738
NaN	NaN		-28.5195	109.54
NaN	NaN		-29.3191	108.141
NaN	NaN		-28.6872	107.33
NaN	NaN		-29.045	109.277
NaN	NaN		-28.5775	108.733
NaN	NaN		-28.8935	108.497
NaN	NaN		-28.8854	109.806
NaN	NaN		-29.1514	108.894
NaN	NaN		-29.9477	109.469
NaN	NaN		-29.8365	109.566
NaN	NaN		-28.5582	109.286
NaN	NaN		-28.9644	108.596
NaN	NaN		-29.34	108.955
NaN	NaN		-29.0644	108.486
NaN	NaN		-29.066	108.717
NaN	NaN		-29.9074	109.041
NaN	NaN		-28.2584	109.074
NaN	NaN		-29.0595	109.788
NaN	NaN		-29.4287	109.082
NaN	NaN		-29.3062	109.764
NaN	NaN		-29.4077	108.563
NaN	NaN		-29.6882	108.729
NaN	NaN		-29.6866	109.179
NaN	NaN		-29.4915	108.478
NaN	NaN		-28.4647	108.826
NaN	NaN		-29.4287	110.312
NaN	NaN		-29.7317	110.39
NaN	NaN		-29.9913	110.142
NaN	NaN		-29.0402	110.264
NaN	NaN		-29.822	109.834
NaN	NaN		-29.1401	110.551
NaN	NaN		-30.1605	110.153
NaN	NaN		-28.2858	109.848
NaN	NaN		-29.0434	111.465
NaN	NaN		-27.9069	110.177
NaN	NaN		-27.5265	110.44
NaN	NaN		-28.6033	110.936
NaN	NaN		-27.7796	110.459
NaN	NaN		-27.051	110.927
NaN	NaN		-27.0155	110.49
NaN	NaN		-28.6211	111.068
NaN	NaN		-27.8747	110.095
NaN	NaN		-27.807	110.299
NaN	NaN		-27.3943	110.678
NaN	NaN		-27.7409	111.72
NaN	NaN		-27.6007	110.923
NaN	NaN		-27.7361	111.38
NaN	NaN		-27.9505	111.107
NaN	NaN		-28.4905	110.304
NaN	NaN		-29.0337	110.754
NaN	NaN		-28.8387	110.171
NaN	NaN		-28.1987	109.711
NaN	NaN		-28.1213	109.971
NaN	NaN		-28.0182	109.108
NaN	NaN		-29.6237	109.305
NaN	NaN		-28.7242	109.993
NaN	NaN		-28.8612	109.258
NaN	NaN		-30.7828	110.003
NaN	NaN		-31.0923	111.789
NaN	NaN		-29.7769	108.136
NaN	NaN		-30.0042	108.117
NaN	NaN		-28.3986	109.432
NaN	NaN		-30.0654	108.966
NaN	NaN		-29.6672	108.388
NaN	NaN		-30.4958	110.261
NaN	NaN		-30.3572	111.284
NaN	NaN		-29.6463	108.52
NaN	NaN		-30.1105	109.64
NaN	NaN		-30.1202	110.004
NaN	NaN		-30.6087	110.701
NaN	NaN		-30.736	110.08
NaN	NaN		-30.1557	110.498
NaN	NaN		-30.3153	110.756
NaN	NaN		-30.5313	110.841
NaN	NaN		-30.2202	109.89
NaN	NaN		-30.678	110.64
NaN	NaN		-30.9794	110.074
NaN	NaN		-31.0906	108.9
NaN	NaN		-32.0949	111.304
NaN	NaN		-32.6446	110.893
NaN	NaN		-32.398	110.317
NaN	NaN		-33.1056	110.404
NaN	NaN		-32.3577	110.981
NaN	NaN		-32.5366	110.229
NaN	NaN		-32.5705	110.831
NaN	NaN		-32.535	110.633
NaN	NaN		-33.1266	111.057
NaN	NaN		-32.3399	110.735
NaN	NaN		-32.3964	111.579
NaN	NaN		-31.7661	110.899
NaN	NaN		-31.4872	111.431
NaN	NaN		-31.3824	109.648

## Sheet: Supplement 3E
X_Cell 0	Y_Cell 0		X_Cell 1	Y_Cell 1
0	0		0	0
-2.16125	-0.539175		-0.539175	-0.54145
-4.10638	-1.24215		-1.24215	-1.0283
-5.83537	-2.10665		-2.10665	-1.46055
-7.56437	-2.97115		-2.97115	-1.8928
-8.42888	-4.2679		-4.2679	-2.32505
-9.29338	-5.56465		-5.56465	-2.7573
-9.94175	-6.64528		-6.42915	-2.54117
-10.374	-7.50977		-6.8614	-1.67667
-10.804	-8.37428		-7.29365	-0.812175
-12.1007	-7.94203		-8.15815	-0.812175
-13.3975	-7.50977		-9.02038	-0.812175
-14.4781	-7.7259		-9.2365	-1.46055
-15.3426	-8.5904		-8.80425	-2.7573
-16.2071	-9.4549		-8.37428	-4.05178
-15.7749	-9.4549		-9.2365	-3.18728
-15.3426	-9.4549		-10.101	-2.32505
-15.5587	-9.67102		-10.7494	-2.10893
-16.4232	-10.1033		-11.1816	-2.54117
-17.2877	-10.5355		-11.6139	-2.97343
-16.8555	-10.1033		-12.0461	-3.4034
-16.4232	-9.67102		-12.4784	-3.83565
-16.2071	-9.4549		-12.9106	-3.83565
-16.2071	-9.4549		-13.3429	-3.4034
-16.2071	-9.4549		-13.7751	-2.97343
-16.2071	-9.4549		-13.7751	-3.4034
-16.2071	-9.4549		-13.7751	-3.83565
-16.4232	-9.4549		-13.7751	-3.61953
-16.8555	-9.4549		-13.7751	-2.7573
-17.2877	-9.4549		-13.7751	-1.8928
-16.8555	-8.15815		-13.7751	-1.8928
-16.4232	-6.8614		-13.7751	-1.8928
-15.5587	-6.21303		-13.7751	-1.67667
-14.262	-6.21303		-13.7751	-1.24442
-12.9652	-6.21303		-13.7751	-0.812175
-13.3975	-5.78078		-14.2074	-0.379925
-13.8297	-5.34853		-14.6396	0.052325
-13.8297	-5.56465		-14.6396	0.26845
-13.3975	-6.42915		-14.2074	0.26845
-12.9652	-7.29365		-13.7751	0.26845
-12.1007	-7.29365		-14.6396	2.4297
-11.2362	-7.29365		-15.5041	4.59095
-11.4523	-6.42915		-15.9364	5.23933
-12.7491	-4.70015		-15.9364	4.37482
-14.0458	-2.97115		-15.9364	3.51032
-14.0458	-4.2679		-15.9364	3.07808
-14.0458	-5.56465		-15.9364	2.64583
-14.4781	-5.78078		-16.1525	2.86195
-15.3426	-4.91628		-16.5847	3.72645
-16.2071	-4.05178		-17.017	4.59095
-16.6394	-4.05178		-17.8815	6.31995
-17.0716	-4.05178		-18.746	8.04895
-17.5038	-4.2679		-19.6105	9.12958
-17.9361	-4.70015		-20.475	9.56183
-18.3683	-5.1324		-21.3395	9.99408
-18.3683	-5.1324		-22.204	11.2908
-18.3683	-5.1324		-23.0685	12.5876
-18.8006	-4.48403		-23.2846	13.0198
-19.6651	-3.18728		-22.8524	12.5876
-20.5296	-1.89053		-22.4201	12.1553
-20.5296	-1.02602		-22.4201	12.1553
-20.5296	-0.161525		-22.4201	12.1553
-20.5296	0.48685		-22.8524	12.5876
-20.5296	0.9191		-23.7169	13.4521
-20.5296	1.35135		-24.5814	14.3166
-21.3941	2.6481		-25.0136	14.7488
-22.2586	3.94485		-25.4459	15.1811
-22.2586	4.59322		-25.662	15.8294
-21.3941	4.59322		-25.662	16.694
-20.5296	4.59322		-25.662	17.5585
-20.0973	5.02547		-26.5265	17.1262
-19.6651	5.45772		-27.391	16.694
-19.6651	7.40285		-28.2555	17.1262
-20.0973	10.8608		-29.12	18.423
-20.5296	14.3166		-29.9845	19.7197
-19.6651	14.7488		-29.5523	19.2874
-18.8006	15.1811		-29.12	18.8552
-19.0167	15.3972		-29.12	19.0713
-20.3135	15.3972		-29.5523	19.9358
-21.6102	15.3972		-29.9845	20.798
-20.7457	16.2617		-29.9845	20.798
-19.8812	17.1262		-29.9845	20.798
-19.449	17.5584		-30.849	21.4464
-19.449	17.5584		-32.5757	22.7432
-19.449	17.5584		-34.3047	24.0399
-18.1522	19.7197		-35.6015	25.3367
-16.8555	21.8809		-36.8982	26.6334
-16.8555	23.3938		-37.5466	27.2818
-18.1522	24.2583		-37.5466	27.2818
-19.449	25.1228		-37.5466	27.2818
-20.3135	25.9873		-37.5466	27.7141
-21.178	26.8518		-37.5466	28.1463
-20.9618	28.3647		-37.5466	28.7947
-19.6651	30.526		-37.5466	29.6592
-18.3683	32.6872		-37.5466	30.5237
-17.9361	32.6872		-38.8434	32.2527
-17.5038	32.6872		-40.1401	33.9817
-17.0716	33.3356		-40.7885	34.63
-16.6394	34.6323		-40.7885	34.1978
-16.2071	35.9268		-40.7885	33.7655
-17.0716	36.7913		-41.653	34.1978
-17.9361	37.6558		-42.5175	34.63
-18.8006	38.088		-43.1659	34.8462
-19.6651	38.088		-43.5981	34.8462
-20.5296	38.088		-44.0304	34.8462
-18.3683	38.9525		-46.1916	38.3042
-16.2071	39.817		-48.3528	41.7622
-15.1265	41.1138		-49.8657	43.4912
-15.1265	42.8428		-50.7302	43.4912
-15.1265	44.5718		-51.5947	43.4912
-14.6942	45.004		-52.027	45.6501
-14.262	45.4363		-52.4592	47.8114
-14.262	45.8685		-52.8915	49.3243
-14.6942	46.3008		-53.3237	50.1888
-15.1265	46.733		-53.756	51.0533
-13.8297	47.5975		-55.0527	51.4855
-12.533	48.462		-56.3472	51.9178
-12.1007	48.8943		-57.4278	52.35
-12.533	48.8943		-58.2923	52.7823
-12.9652	48.8943		-59.1568	53.2145
-12.533	50.191		-60.4536	54.9435
-12.1007	51.4878		-61.7503	56.6725
-11.8846	53.0007		-63.0471	58.4015
-11.8846	54.7297		-64.3438	60.1305
-11.8846	56.4587		-65.6406	61.8595
-11.4523	55.1619		-66.5051	61.4273
-11.0201	53.8652		-67.3696	60.995
-10.5878	53.2168		-68.0179	60.995
-10.1579	53.2168		-68.4502	61.4273
-9.72563	53.2168		-68.8825	61.8595
-11.0201	54.9458		-68.4502	64.0208
-12.3169	56.6748		-68.0179	66.182
-12.9652	57.9715		-67.5857	67.4765
-12.9652	58.8338		-67.1535	67.9087
-12.9652	59.6983		-66.7212	68.341
-12.1007	59.266		-68.8825	68.341
-11.2362	58.8338		-71.0437	68.341
-10.804	59.266		-71.9082	69.4216
-10.804	60.5628		-71.4759	71.5829
-10.804	61.8595		-71.0437	73.7441
-9.5095	62.724		-68.8825	75.0409
-8.21275	63.5885		-66.7212	76.3376
-7.56437	65.1014		-66.5051	76.5537
-7.56437	67.2626		-68.2341	75.6893
-7.56437	69.4239		-69.9631	74.8248
-7.56437	72.0174		-69.0986	76.1215
-7.56437	74.6109		-68.2341	77.4183
-7.34825	76.1238		-68.0179	78.0666
-6.916	76.556		-68.4502	78.0666
-6.48375	76.9883		-68.8825	78.0666
-5.187	77.8528		-71.4759	78.0666
-3.89025	78.7173		-74.0695	78.0666
-4.10638	79.5818		-74.2856	78.9311
-5.83537	80.4463		-72.1243	80.6601
-7.56437	81.3085		-69.9631	82.3891
-6.26763	82.6052		-69.9631	83.6859
-4.97088	83.902		-69.9631	84.9826
-4.75475	84.5504		-69.9631	86.0632
-5.61925	84.5504		-69.9631	86.9278
-6.48375	84.5504		-69.9631	87.7922
-6.48375	84.9826		-69.9631	89.089
-6.48375	85.4149		-69.9631	90.3835
-6.26763	86.0632		-69.3147	91.0319
-5.83537	86.9278		-68.0179	91.0319
-5.40312	87.7922		-66.7212	91.0319
-6.26763	89.089		-66.7212	94.0576
-7.13212	90.3858		-66.7212	97.0833
-7.56437	91.4664		-66.5051	98.3801
-7.56437	92.3309		-66.0728	97.9479
-7.56437	93.1954		-65.6406	97.5156
-6.26763	92.3309		-65.6406	97.9479
-4.97088	91.4664		-65.6406	98.3801
-4.53863	91.0341		-65.8567	99.4607
-4.97088	91.0341		-66.2889	101.19
-5.40312	91.0341		-66.7212	102.919
-5.40312	93.1954		-67.1535	102.919
-5.40312	95.3566		-67.5857	102.919
-5.187	95.5727		-67.3696	103.135
-4.75475	93.8438		-66.5051	103.567
-4.3225	92.1148		-65.6406	103.999
-4.3225	92.547		-64.7761	103.567
-4.3225	92.9792		-63.9116	103.135
-4.97088	94.0599		-63.2632	102.919
-6.26763	95.7889		-62.8309	102.919
-7.56437	97.5179		-62.3987	102.919
-6.69987	96.6534		-62.3987	104.648
-5.83537	95.7889		-62.3987	106.377
-5.61925	95.7889		-62.1826	107.025
-6.0515	96.6534		-61.7503	106.593
-6.48375	97.5179		-61.3181	106.161
-7.34825	97.9501		-61.3181	107.025
-8.21275	98.3824		-61.3181	107.89
-8.645	98.3824		-61.3181	108.322
-8.645	97.9501		-61.3181	108.322
-8.645	97.5179		-61.3181	108.322
-8.21275	98.8146		-60.4536	109.186
-7.7805	100.111		-59.5891	110.051
-7.34825	101.192		-58.9407	110.915
-6.916	102.056		-58.5085	111.78
-6.48375	102.921		-58.0762	112.644
-6.916	102.056		-58.5085	111.348
-7.34825	101.192		-58.9407	110.051
-7.56437	100.976		-59.1568	109.835
-7.56437	101.408		-59.1568	110.699
-7.56437	101.84		-59.1568	111.564
-7.13212	101.84		-59.1568	110.699
-6.69987	101.84		-59.1568	109.835
-6.26763	101.84		-59.3729	109.619
-5.83537	101.84		-59.8052	110.051
-5.40312	101.84		-60.2375	110.483
-7.13212	101.84		-58.5085	111.78
-8.86113	101.84		-56.7794	113.077
-9.5095	102.056		-55.915	113.293
-9.07725	102.489		-55.915	112.428
-8.645	102.921		-55.915	111.564
-7.7805	103.785		-56.3472	110.267
-6.916	104.648		-56.7794	108.97
-6.0515	104.434		-56.7794	108.97
-5.187	103.137		-56.3472	110.267
-4.3225	101.84		-55.915	111.564
-5.187	101.84		-55.915	112.428
-6.0515	101.84		-55.915	113.293
-6.26763	102.273		-56.3472	113.507
-5.83537	103.137		-57.2117	113.077
-5.40312	104.002		-58.0762	112.644
-4.97088	104.434		-57.6439	113.077
-4.53863	104.864		-57.2117	113.507
-4.3225	105.08		-56.3472	113.507
-4.3225	105.08		-55.0527	113.077
-4.3225	105.08		-53.756	112.644
-5.61925	105.512		-53.756	113.939
-6.916	105.944		-53.756	115.236
-7.13212	106.377		-53.3237	115.668
-6.26763	106.809		-52.4592	115.236
-5.40312	107.241		-51.5947	114.803
-5.83537	107.673		-50.7302	115.236
-6.26763	108.106		-49.8657	115.668
-6.26763	108.106		-49.8657	115.884
-5.83537	107.673		-50.7302	115.884
-5.40312	107.241		-51.5947	115.884
-5.83537	108.97		-50.7302	116.316
-6.26763	110.699		-49.8657	116.748
-6.48375	110.915		-49.0012	116.532
-6.48375	109.619		-48.1367	115.668
-6.48375	108.322		-47.2722	114.803
-6.0515	109.186		-46.84	114.803
-5.61925	110.051		-46.4077	114.803
-5.61925	110.483		-46.4077	115.019
-6.0515	110.483		-46.84	115.452
-6.48375	110.483		-47.2722	115.884
-5.61925	110.915		-47.2722	116.316
-4.75475	111.348		-47.2722	116.748
-4.53863	111.131		-47.4883	116.748
-4.97088	110.267		-47.9206	116.316
-5.40312	109.402		-48.3528	115.884
-6.26763	111.131		-47.9206	115.884
-7.13212	112.86		-47.4883	115.884
-7.13212	113.725		-47.2722	116.1
-6.26763	113.725		-47.2722	116.532
-5.40312	113.725		-47.2722	116.965
-5.40312	115.454		-46.4077	116.965
-5.40312	117.183		-45.5432	116.965
-5.40312	117.831		-45.5432	116.965
-5.40312	117.399		-46.4077	116.965
-5.40312	116.967		-47.2722	116.965
-5.83537	117.399		-46.4077	115.668
-6.26763	117.831		-45.5432	114.371
-6.0515	118.047		-44.4626	114.371
-5.187	118.047		-43.1659	115.668
-4.3225	118.047		-41.8691	116.965
-4.3225	118.047		-42.3014	116.532
-4.3225	118.047		-42.7336	116.1
-4.10638	118.696		-42.5175	116.1
-3.67413	119.993		-41.653	116.532
-3.24188	121.289		-40.7885	116.965
-2.37738	121.722		-39.924	116.532
-1.51288	122.154		-39.0595	116.1
-0.8645	121.938		-39.924	115.019
-0.43225	121.073		-42.5175	113.293
0	120.209		-45.111	111.564
0	121.505		-43.382	113.723
0	122.802		-41.653	115.884
-0.43225	123.234		-40.5724	116.748
-1.29675	122.802		-40.1401	116.316
-2.16125	122.37		-39.7079	115.884
-1.29675	122.37		-40.1401	115.019
-0.43225	122.37		-40.5724	114.155
0.43225	123.018		-41.2207	113.723
1.29675	124.315		-42.0852	113.723
2.16125	125.612		-42.9497	113.723
3.02575	126.044		-42.0852	113.293
3.89025	126.476		-41.2207	112.86
4.53863	126.26		-41.0046	112.644
4.97087	125.396		-41.4369	112.644
5.40312	124.531		-41.8691	112.644
5.40312	124.099		-41.4369	112.212
5.40312	123.667		-41.0046	111.78
5.40312	123.018		-41.2207	111.348
5.40312	122.154		-42.0852	110.915
5.40312	121.289		-42.9497	110.483
6.26763	120.857		-42.0852	110.051
7.13212	120.425		-41.2207	109.619
6.69987	120.209		-41.653	109.619
4.97087	120.209		-43.382	110.051
3.24187	120.209		-45.111	110.483
4.10638	119.776		-44.6787	110.051
4.97087	119.344		-44.2465	109.619
6.0515	119.344		-44.6787	109.402
7.34825	119.776		-45.9755	109.402
8.645	120.209		-47.2722	109.402
8.21275	120.209		-46.4077	108.97
7.7805	120.209		-45.5432	108.538
7.7805	119.993		-45.3271	108.754
8.21275	119.56		-45.7593	109.619
8.645	119.128		-46.1916	110.483
7.7805	119.128		-47.0561	108.754
6.916	119.128		-47.9206	107.025
6.48375	118.696		-48.1367	106.161
6.48375	117.831		-47.7045	106.161
6.48375	116.967		-47.2722	106.161
6.916	119.128		-48.569	107.457
7.34825	121.289		-49.8657	108.754
7.34825	120.857		-50.0819	108.754
6.916	117.831		-49.2174	107.457
6.48375	114.806		-48.3528	106.161
7.7805	113.941		-49.2174	106.161
9.07725	113.077		-50.0819	106.161
9.72562	112.86		-50.298	106.377
9.72562	113.293		-49.8657	106.809
9.72562	113.725		-49.4335	107.241
10.1579	112.428		-49.0012	106.809
10.5901	111.131		-48.569	106.377
10.5901	110.483		-47.9206	105.728
10.1579	110.483		-47.0561	104.864
9.72562	110.483		-46.1916	103.999
11.0224	110.483		-46.1916	104.432
12.3191	110.483		-46.1916	104.864
13.1814	110.267		-45.9755	104.864
13.6136	109.835		-45.5432	104.432
14.0458	109.402		-45.111	103.999
14.0458	108.97		-45.9755	104.432
14.0458	108.538		-46.84	104.864
13.3975	108.106		-47.2722	104.648
12.103	107.673		-47.2722	103.783
10.8063	107.241		-47.2722	102.919
11.6707	107.241		-47.2722	104.215
12.5352	107.241		-47.2722	105.512
13.1814	107.673		-47.2722	105.728
13.6136	108.538		-47.2722	104.864
14.0458	109.402		-47.2722	103.999
13.6136	109.835		-48.1367	103.567
13.1814	110.267		-49.0012	103.135
12.7514	110.699		-49.4335	102.703
12.3191	111.131		-49.4335	102.27
11.8869	111.564		-49.4335	101.838
13.1814	110.267		-49.0012	102.27
14.4781	108.97		-48.569	102.703
15.5587	108.754		-48.569	102.703
16.4232	109.619		-49.0012	102.27
17.2877	110.483		-49.4335	101.838
17.72	110.915		-49.4335	102.27
18.1522	111.348		-49.4335	102.703
18.3683	111.996		-49.6496	103.135
18.3683	112.86		-50.0819	103.567
18.3683	113.725		-50.5141	103.999
19.6651	113.293		-50.5141	102.703
20.9618	112.86		-50.5141	101.406
22.2586	113.293		-50.7302	101.406
23.5554	114.589		-51.1625	102.703
24.8521	115.886		-51.5947	103.999
24.4198	115.022		-51.5947	103.135
23.9876	114.157		-51.5947	102.27
23.1231	113.509		-51.3786	102.054
21.8264	113.077		-50.9464	102.486
20.5296	112.644		-50.5141	102.919
21.3941	113.509		-51.3786	103.351
22.2586	114.373		-52.2431	103.783
22.907	114.373		-52.027	103.783
23.3392	113.509		-50.7302	103.351
23.7715	112.644		-49.4335	102.919
24.636	112.644		-50.7302	103.783
25.5005	112.644		-52.027	104.648
25.7166	112.86		-52.6754	104.648
25.2843	113.293		-52.6754	103.783
24.8521	113.725		-52.6754	102.919
24.4198	113.293		-51.8109	103.351
23.9876	112.86		-50.9464	103.783
23.9876	112.86		-50.298	103.783
24.4198	113.293		-49.8657	103.351
24.8521	113.725		-49.4335	102.919
24.8521	112.86		-49.0012	102.919
24.8521	111.996		-48.569	102.919
25.0682	111.996		-47.9206	103.351
25.5005	112.86		-47.0561	104.215
25.9327	113.725		-46.1916	105.08
25.5005	111.996		-47.9206	104.648
25.0682	110.267		-49.6496	104.215
25.2843	109.619		-49.8657	103.999
26.1488	110.051		-48.569	103.999
27.0133	110.483		-47.2722	103.999
27.0133	108.754		-47.2722	104.432
27.0133	107.025		-47.2722	104.864
26.7972	107.241		-47.7045	104.864
26.365	109.402		-48.569	104.432
25.9327	111.564		-49.4335	103.999
25.9327	110.267		-48.569	104.432
25.9327	108.97		-47.7045	104.864
26.1488	108.106		-47.4883	105.296
26.5811	107.673		-47.9206	105.728
27.0133	107.241		-48.3528	106.161
26.5811	107.673		-47.0561	107.457
26.1488	108.106		-45.7593	108.754
25.5005	108.322		-44.8948	108.97
24.636	108.322		-44.4626	108.106
23.7715	108.322		-44.0304	107.241
22.907	107.89		-45.3271	108.106
22.0425	107.457		-46.6239	108.97
22.6909	107.241		-46.1916	109.186
24.8521	107.241		-44.0304	108.754
NaN	NaN		NaN	NaN
