# Supplementary material for: Cells use molecular working memory to navigate in changing chemoattractant fields
Source: eLife. 2022 Jun 6;11:e76825. doi: 10.7554/eLife.76825 (PMC9282860; doi:10.7554/eLife.76825)
Supplement: Figure 3—source data 1. [file elife-76825-fig3-data1.xlsx]

## Sheet: 3A (left)
	X_Cell 0	Y_Cell 0	X_Cell 1	Y_Cell 1	X_Cell 2	Y_Cell 2	X_Cell 3	Y_Cell 3	X_Cell 4	Y_Cell 4	X_Cell 5	Y_Cell 5	X_Cell 6	Y_Cell 6	X_Cell 7	Y_Cell 7	X_Cell 8	Y_Cell 8	X_Cell 9	Y_Cell 9	X_Cell 10	Y_Cell 10	X_Cell 11	Y_Cell 11	X_Cell 12	Y_Cell 12	X_Cell 13	Y_Cell 13	X_Cell 14	Y_Cell 14	X_Cell 15	Y_Cell 15	X_Cell 16	Y_Cell 16	X_Cell 17	Y_Cell 17	X_Cell 18	Y_Cell 18	X_Cell 19	Y_Cell 19	X_Cell 20	Y_Cell 20	X_Cell 21	Y_Cell 21	X_Cell 22	Y_Cell 22
0	0	0	0	0	0	0	0	0	0	0	0	0	0	0	0	0	0	0	0	0	0	0	0	0	0	0	0	0	0	0	0	0	0	0	0	0	0	0	0	0	0	0	0	0	0	0
1	0	0.54145	-1.08062	0	-1.08062	-0.539175	-0.539175	-1.62207	-0.539175	-0.539175	-2.16125	-0.539175	-1.07835	1.62207	-0.539175	-2.7027	-0.539175	-0.54145	-0.8645	0.43225	-0.539175	0	-1.08062	0.54145	-1.08063	0.539175	-1.08062	-1.08063	-1.6198	-0.539175	-0.188825	0.0546	0	0	0	0	0	0	0.091	-0.015925	1.11475	-1.0374	-0.27755	-0.816725	0.725725	-0.448175
2	0.216125	0.593775	-1.40367	-0.43225	-1.62207	-1.02603	-1.6744	-1.7836	-1.6744	-0.593775	-4.10638	-1.24215	-2.26817	1.7836	-1.24215	-3.40567	-1.24215	-1.0283	-1.729	0.8645	-0.8099	-0.216125	-1.83593	0.59605	-2.16125	1.07835	-2.16125	-2.16125	-3.24188	-1.08062	-0.352625	-0.466375	0	0	0	0	0	0	0.029575	0.43225	4.14505	-0.639275	-1.0283	-1.0374	0.7462	-0.734825
3	0.648375	0.161525	-0.971425	-1.29675	-1.62207	-1.45827	-3.4034	-0.48685	-3.4034	-0.161525	-5.83537	-2.10665	-3.56492	0.48685	-2.10665	-2.10892	-2.10665	-1.46055	-1.29675	1.29675	-0.8099	-0.648375	-2.26818	0.1638	-4.32022	1.07835	-3.02575	-1.729	-3.67413	-1.51287	-0.45045	-0.91455	0	0	-2.275	0	-2.275	0	-0.225225	0.67795	4.43852	-0.502775	-1.40595	0.6097	0.320775	-1.28993
4	1.08063	-0.270725	-0.539175	-2.16125	-1.62207	-1.89053	-5.1324	0.8099	-5.1324	0.270725	-7.56437	-2.97115	-4.86167	-0.8099	-2.97115	-0.812175	-2.97115	-1.8928	-0.8645	1.729	-0.8099	-1.08063	-2.70043	-0.26845	-6.48147	1.07835	-3.89025	-1.29675	-4.10638	-1.94512	-0.2821	-0.566475	0	0	-4.55	0	-2.275	0	-0.284375	0.8554	5.3781	-1.26035	-2.70725	0.889525	-0.12285	-1.84275
5	1.08063	-0.270725	-0.971425	-2.16125	-2.48658	-2.32277	-4.70015	0.37765	-5.9969	0.270725	-8.42888	-4.2679	-6.15842	-0.8099	-4.70015	-0.379925	-4.2679	-2.32505	-0.43225	2.37738	-1.6744	-1.51288	-3.99718	-1.5652	-7.99435	0.862225	-4.75248	-0.8645	-5.18473	-2.16125	-0.81445	-0.684775	0	0	-4.55	0	-2.275	-9.1	-0.179725	1.05332	5.0414	-1.45828	-1.8655	0.548275	-0.5278	-2.51387
6	1.08063	-0.270725	-1.40367	-2.16125	-3.35108	-2.75502	-4.2679	-0.0546	-6.85912	0.270725	-9.29338	-5.56465	-7.45517	-0.8099	-6.42915	0.052325	-5.56465	-2.7573	0	3.24188	-2.5389	-1.94513	-5.29393	-2.86195	-8.85885	0.43225	-5.61698	-0.43225	-6.91372	-2.16125	-0.53235	-0.684775	0	0	-6.825	2.275	-2.275	-4.55	0.3003	1.29447	5.41223	-2.15442	-1.04422	-0.8463	-0.4368	-2.457
7	1.08063	-0.270725	-2.05205	-1.94512	-4.21558	-2.32277	-4.48402	-0.48685	-7.93975	0.0546	-9.94175	-6.64528	-8.31967	-0.8099	-7.7259	0.26845	-6.42915	-2.54117	0.43225	4.10638	-2.97115	-2.16125	-6.15843	-2.64583	-9.72335	0	-6.48148	0	-8.64272	-2.16125	-0.44135	-1.16025	2.275	0	-6.825	2.275	-2.275	-4.55	0.243425	2.24997	6.097	-2.5753	-2.38192	-1.07152	-1.19665	-3.78332
8	1.08063	-0.270725	-2.91655	-1.51288	-5.08008	-1.02603	-5.34852	-0.9191	-9.2365	-0.37765	-10.374	-7.50977	-8.75192	-0.8099	-8.5904	0.26845	-6.8614	-1.67667	1.29675	3.24188	-2.97115	-2.16125	-6.59068	-0.916825	-10.5878	0.43225	-6.91372	-1.29675	-9.50722	-2.16125	-0.639275	-0.748475	2.275	0	-6.825	2.275	-2.275	-4.55	0.061425	2.86423	6.79315	-2.5025	-2.35918	-1.65165	-1.14205	-3.8857
9	1.08063	-0.270725	-3.78105	-1.08063	-5.94458	0.270725	-6.21303	-1.35135	-10.5332	-0.8099	-10.804	-8.37428	-9.18417	-0.8099	-9.4549	0.26845	-7.29365	-0.812175	2.16125	2.37738	-2.97115	-2.16125	-7.02293	0.812175	-11.4523	0.862225	-7.34598	-2.5935	-10.3717	-2.16125	-0.4004	-0.9373	2.275	0	-9.1	2.275	-6.825	2.275	0.093275	1.80407	7.72818	-4.02448	-2.16808	-1.3377	-0.82355	-3.70825
10	0.648375	0.161525	-3.78105	-1.51288	-5.51233	-0.161525	-7.07753	-0.48685	-11.83	-0.37765	-12.1007	-7.94203	-9.61642	-0.37765	-9.88487	1.13295	-8.15815	-0.812175	2.37738	3.24188	-4.2679	-2.5935	-7.45518	-0.484575	-11.6685	1.07835	-7.99435	-3.458	-10.5878	-2.16125	-0.507325	-1.64938	2.275	0	-9.1	2.275	-6.825	4.55	0.13195	2.16353	8.54718	-4.04495	-0.894075	-2.09072	-1.7836	-4.60005
11	0.216125	0.593775	-3.78105	-1.94512	-5.08008	-0.593775	-7.94203	0.37765	-13.1267	0.0546	-13.3975	-7.50977	-10.0487	0.0546	-10.3171	1.99745	-9.02038	-0.812175	1.94512	5.83538	-5.56465	-3.02575	-7.88743	-1.78133	-11.2362	1.07835	-8.85885	-3.89025	-10.1556	-2.16125	-0.912275	-1.33997	2.275	0	-11.375	4.55	-9.1	6.825	0.634725	1.8564	9.05905	-4.27245	-1.092	-0.1638	-1.06015	-3.6946
12	-0.216125	0.593775	-2.91655	-2.37738	-5.72845	-1.45827	-8.80653	0.593775	-13.9912	-0.161525	-14.4781	-7.7259	-10.2648	-0.161525	-10.7494	2.4297	-9.2365	-1.46055	1.51288	8.42888	-5.9969	-3.458	-8.10355	-1.34908	-10.804	1.07835	-9.72335	-4.3225	-9.72335	-2.16125	-0.812175	-1.59932	2.275	0	-13.65	4.55	-9.1	6.825	0.766675	2.30002	9.8462	-3.89707	-0.819	-0.648375	-1.3013	-4.21102
13	-0.648375	0.161525	-1.18755	-2.80962	-7.45518	-2.75502	-9.67102	0.161525	-14.4235	-1.02603	-15.3426	-8.5904	-10.2648	-1.02603	-11.1816	2.4297	-8.80425	-2.7573	1.94512	7.13213	-5.56465	-3.89025	-8.10355	0.812175	-10.804	0.216125	-9.72335	-4.3225	-10.5878	-2.16125	-0.7735	-1.6562	2.275	0	-13.65	4.55	-11.375	6.825	1.274	2.63445	11.1202	-3.69232	0.0091	0.757575	-0.994175	-4.21558
14	-1.08062	-0.270725	0.54145	-3.24188	-9.18417	-4.05178	-10.5355	-0.270725	-14.8557	-1.89053	-16.2071	-9.4549	-10.2648	-1.89053	-11.6139	2.4297	-8.37428	-4.05178	2.37738	5.83538	-5.1324	-4.3225	-8.10355	2.97342	-10.804	-0.648375	-9.72335	-4.3225	-11.4524	-2.16125	-0.994175	-2.67085	2.275	0	-15.925	4.55	-11.375	6.825	1.38775	3.1031	12.0552	-4.5682	-0.084175	1.33997	-1.19892	-4.05178
15	-0.216125	-0.270725	0.1092	-4.53863	-9.18417	-2.32277	-10.1033	0.161525	-14.8557	-1.45828	-15.7749	-9.4549	-11.1293	-1.02603	-11.6139	2.86195	-9.2365	-3.18728	3.24188	5.83538	-5.56465	-3.458	-8.10355	1.24442	-11.0201	-0.8645	-9.93948	-4.97087	-11.8846	-2.37737	-1.1466	-2.96205	2.275	0	-18.2	4.55	-13.65	6.825	1.6198	3.14177	12.1212	-4.85485	-0.220675	1.56293	-1.10792	-4.4317
16	0.648375	-0.270725	-0.32305	-5.83537	-9.18417	-0.593775	-9.67102	0.593775	-14.8557	-1.02603	-15.3426	-9.4549	-11.9938	-0.161525	-11.6139	3.2942	-10.101	-2.32505	4.53863	7.13213	-5.9969	-2.5935	-8.10355	-0.484575	-11.4523	-0.43225	-10.3717	-6.26535	-11.8846	-2.80735	-1.4105	-3.57402	2.275	0	-20.475	4.55	-15.925	6.825	1.80408	4.04268	13.0062	-4.03357	-0.0819	2.48885	-1.95877	-4.5136
17	0.8645	-0.270725	-0.7553	-5.83537	-9.4003	0.0546	-9.67102	1.02602	-15.0719	-0.8099	-15.5587	-9.67102	-12.6399	0.0546	-11.3978	2.21357	-10.7494	-2.10892	5.83538	8.42888	-6.21303	-2.37738	-8.75193	-1.78133	-11.8846	0	-10.804	-7.5621	-11.8846	-3.2396	-1.4924	-2.80963	2.275	0	-20.475	4.55	-15.925	6.825	2.08845	3.60132	13.2382	-4.22923	-0.728	2.65038	-1.2103	-4.34298
18	0.43225	-0.270725	-1.18755	-4.53863	-9.83255	-0.37765	-10.1033	1.45827	-15.5041	-0.8099	-16.4232	-10.1033	-13.0721	-0.37765	-10.9655	-0.379925	-11.1816	-2.54117	5.40313	8.42888	-6.21303	-2.80962	-10.0487	-2.64583	-11.0201	0.43225	-12.9652	-7.12985	-11.8846	-2.37737	-1.74492	-3.17818	0	-9.1	-22.75	2.275	-15.925	6.825	2.45473	3.9767	14.0163	-3.13268	-0.630175	2.5207	-1.00783	-4.5955
19	0	-0.270725	-1.6198	-3.24188	-10.2648	-0.8099	-10.5355	1.89052	-15.9364	-0.8099	-17.2877	-10.5355	-13.5044	-0.8099	-10.5332	-2.97342	-11.6139	-2.97343	4.97088	8.42888	-6.21303	-3.24188	-11.3454	-3.51032	-10.1556	0.862225	-15.1265	-6.6976	-11.8846	-1.51287	-1.33542	-3.12357	0	-9.1	-22.75	0	-15.925	6.825	3.01892	3.86295	14.419	-3.48757	-0.188825	2.66403	-1.03285	-4.368
20	-0.43225	-0.270725	-2.4843	-3.67413	-9.83255	-0.8099	-10.1033	1.02602	-16.8009	-0.37765	-16.8555	-10.1033	-14.3689	-0.8099	-10.9655	-1.24442	-12.0461	-3.4034	4.3225	8.42888	-6.643	-3.67413	-10.4809	-3.51032	-10.1556	1.72672	-16.4232	-6.48147	-12.3168	-0.8645	-1.64937	-2.4934	0	-9.1	-25.025	-2.275	-15.925	6.825	3.0576	4.28837	15.1083	-2.88243	-0.4368	3.32833	-0.675675	-4.04723
21	-0.8645	-0.270725	-3.3488	-4.10637	-9.4003	-0.8099	-9.67102	0.161525	-17.6654	0.0546	-16.4232	-9.67102	-15.2334	-0.8099	-11.3978	0.484575	-12.4784	-3.83565	3.458	8.42888	-7.07525	-4.10637	-9.61643	-3.51032	-11.0201	3.02347	-16.8555	-6.48147	-13.1814	-0.43225	-1.2558	-2.79825	0	-9.1	-27.3	-2.275	-15.925	6.825	3.81063	4.42943	15.3244	-2.18173	-0.429975	2.61625	-0.561925	-4.6592
22	-0.43225	-0.0546	-3.56492	-4.75475	-9.4003	-0.8099	-10.1033	-0.0546	-17.8815	-0.161525	-16.2071	-9.4549	-15.8818	-0.593775	-11.1816	1.34907	-12.9106	-3.83565	2.5935	8.42888	-7.5075	-4.10637	-9.4003	-3.2942	-11.8846	4.32022	-17.2877	-6.48147	-14.0458	0	-1.37182	-3.0849	0	-9.1	-27.3	2.275	-15.925	6.825	3.90845	4.7684	16.1275	-2.27955	-0.2184	2.99162	-0.871325	-3.64
23	0.8645	0.37765	-3.13267	-5.61925	-9.83255	-0.8099	-11.4	0.37765	-17.4493	-1.02603	-16.2071	-9.4549	-16.314	-0.161525	-10.3171	1.34907	-13.3429	-3.4034	2.5935	9.29338	-7.93975	-3.67413	-9.83255	-2.86195	-12.3168	4.75248	-16.8555	-5.187	-13.6136	0.8645	-1.34907	-2.70498	0	-9.1	-27.3	2.275	-15.925	6.825	4.55455	4.7229	16.4027	-1.51742	-0.3822	3.50578	-0.834925	-3.23505
24	2.16125	0.8099	-2.70042	-6.48375	-10.2648	-0.8099	-12.6968	0.8099	-17.017	-1.89053	-16.2071	-9.4549	-16.7463	0.270725	-9.4549	1.34907	-13.7751	-2.97343	2.5935	10.1579	-8.372	-3.24188	-10.2648	-2.4297	-12.7491	5.18472	-16.4232	-3.89025	-13.1814	1.729	-1.82455	-2.95295	0	-9.1	-27.3	2.275	-15.925	9.1	5.23478	5.32805	17.1421	-0.9282	-0.8645	3.38293	-0.46865	-3.4216
25	1.29675	0.8099	-2.26817	-4.75475	-10.6971	-1.24215	-12.6968	0.8099	-18.746	-1.02603	-16.2071	-9.4549	-17.6108	0.702975	-9.88487	1.34907	-13.7751	-3.4034	2.37738	10.374	-8.372	-3.24188	-10.6971	-2.4297	-12.9652	5.61697	-15.991	-3.24187	-12.9652	2.37738	-1.90417	-3.5672	0	-9.1	-27.3	2.275	-18.2	9.1	6.15842	5.64427	18.2978	0.1365	-0.439075	4.0859	-1.10338	-2.59123
26	0.43225	0.8099	-1.83592	-3.02575	-11.1293	-1.6744	-12.6968	0.8099	-20.475	-0.161525	-16.2071	-9.4549	-18.4753	1.13522	-10.3171	1.34907	-13.7751	-3.83565	1.94512	9.94175	-8.372	-3.24188	-11.1293	-2.4297	-12.9652	6.04922	-15.5587	-3.24187	-12.9652	2.80963	-1.47647	-4.10182	0	-9.1	-31.85	4.55	-18.2	9.1	6.5975	5.5146	18.5754	0.57785	-1.28083	5.30985	-0.8372	-1.74492
27	0	0.8099	-1.40367	-2.16125	-11.3454	-1.45827	-12.6968	1.24215	-21.3395	0.48685	-16.4232	-9.4549	-19.772	1.13522	-11.1816	0.916825	-13.7751	-3.61953	1.51288	9.5095	-8.15587	-3.458	-11.7777	-2.21357	-12.9652	6.48147	-15.1265	-3.24187	-12.9652	3.24188	-1.57657	-3.65593	-2.275	-9.1	-31.85	4.55	-18.2	9.1	7.27318	6.33587	19.5263	1.99063	-1.36727	6.01055	-0.91	-1.85867
28	0	0.8099	-0.971425	-2.16125	-11.3454	-0.593775	-12.6968	2.10665	-21.3395	0.9191	-16.8555	-9.4549	-21.501	0.702975	-12.4784	0.052325	-13.7751	-2.7573	1.51288	11.2385	-7.72362	-3.89025	-12.6422	-1.78133	-13.3975	8.21047	-15.1265	-1.08063	-12.9652	4.10638	-1.62435	-3.61497	-2.275	-9.1	-31.85	4.55	-20.475	11.375	7.34598	6.3336	19.7766	3.57175	-2.32277	6.15843	-0.2821	-1.93602
29	0	0.8099	-0.539175	-2.16125	-11.3454	0.270725	-12.6968	2.97115	-21.3395	1.35135	-17.2877	-9.4549	-23.23	0.270725	-13.7751	-0.812175	-13.7751	-1.8928	1.51288	12.9652	-7.29137	-4.3225	-13.5067	-1.34908	-13.8297	9.93948	-15.1265	1.08063	-12.9652	4.97088	-1.7108	-3.17363	-2.275	-9.1	-31.85	4.55	-20.475	11.375	7.81462	6.85457	20.7071	4.00627	-1.88825	7.00245	-0.2093	-1.50833
30	-0.43225	0.8099	-0.971425	-2.5935	-10.9132	-0.161525	-12.2645	2.97115	-22.204	0.9191	-16.8555	-8.15815	-24.0945	1.13522	-13.7751	0.916825	-13.7751	-1.8928	0.8645	14.4781	-6.42915	-4.3225	-13.5067	-1.34908	-13.8297	10.804	-15.3426	2.16125	-13.1814	5.61925	-1.5834	-4.00173	-2.275	-9.1	-31.85	4.55	-25.025	11.375	8.53807	7.36417	21.9287	4.52952	-1.9474	7.2254	-1.0465	-2.10438
31	-0.8645	0.8099	-1.40367	-3.02575	-10.4809	-0.593775	-11.8323	2.97115	-23.0685	0.48685	-16.4232	-6.8614	-24.959	1.99972	-13.7751	2.64582	-13.7751	-1.8928	-0.43225	15.7749	-5.56465	-4.3225	-13.5067	-1.34908	-13.3975	10.804	-15.7749	2.16125	-13.6136	6.0515	-1.82228	-3.44662	-2.275	-6.825	-38.675	2.275	-25.025	11.375	8.6268	7.14123	22.6909	5.55327	-2.2932	7.76003	-0.6097	-1.547
32	-0.8645	1.02602	-2.05205	-2.5935	-10.2648	-0.593775	-11.8323	2.97115	-23.7169	0.48685	-15.5587	-6.21303	-26.0396	2.21585	-13.7751	3.94258	-13.7751	-1.67667	-1.729	17.0716	-5.1324	-4.53863	-13.2906	-1.5652	-12.9652	10.804	-16.2071	2.16125	-14.0458	6.48375	-2.2477	-3.67413	-2.275	-6.825	-38.675	2.275	-25.025	13.65	9.14095	7.40058	23.3369	6.58158	-2.55027	8.58358	-0.1729	-1.13295
33	-0.43225	1.45827	-2.91655	-1.29675	-10.2648	-0.161525	-12.2645	2.97115	-24.1491	0.9191	-14.262	-6.21303	-27.3364	1.7836	-13.7751	4.80708	-13.7751	-1.24442	-1.729	17.0716	-5.1324	-4.97087	-12.8583	-1.99745	-12.9652	11.2362	-16.2071	1.729	-13.6136	6.916	-1.9383	-4.2133	-2.275	-6.825	-38.675	2.275	-25.025	20.475	9.39348	8.46528	23.8079	7.30048	-3.74237	8.99762	-0.175175	-1.11475
34	0	1.89052	-3.78105	0	-10.2648	0.270725	-12.6968	2.97115	-24.5814	1.35135	-12.9652	-6.21303	-28.6331	1.35135	-13.7751	5.67158	-13.7751	-0.812175	-1.729	17.0716	-5.1324	-5.40312	-12.4261	-2.4297	-12.9652	11.6685	-16.2071	1.29675	-13.1814	7.34825	-2.1476	-3.95395	-2.275	-6.825	-45.5	2.275	-25.025	20.475	9.99407	7.9898	24.6974	9.15687	-4.69787	9.30248	-0.944125	-1.71535
35	-0.43225	1.45827	-3.3488	-0.8645	-10.2648	0.702975	-12.6968	3.4034	-25.0136	1.7836	-13.3975	-5.78078	-29.0654	0.48685	-14.2074	5.67158	-14.2074	-0.379925	-1.51287	17.2877	-4.70015	-4.53863	-12.8583	-3.2942	-12.7491	12.533	-16.6394	1.29675	-12.7491	7.99663	-2.00655	-4.48175	-2.275	-6.825	-43.225	2.275	-25.025	20.475	10.7312	8.87932	25.0296	9.83482	-4.77067	9.68012	-0.052325	-1.6198
36	-0.8645	1.02602	-2.91655	-1.729	-10.2648	1.13523	-12.6968	3.83565	-25.4459	2.21585	-13.8297	-5.34852	-29.4976	-0.37765	-14.6396	5.67158	-14.6396	0.052325	-1.08062	17.72	-4.2679	-3.67413	-13.2906	-4.1587	-12.3168	13.8297	-17.5039	1.729	-12.3168	8.86113	-2.33415	-4.05178	-2.275	-6.825	-43.225	2.275	-25.025	20.475	11.2089	9.54363	25.8031	10.3831	-5.75347	10.0578	0.2184	-0.966875
37	-1.08062	1.02602	-3.3488	-2.16125	-10.4809	1.13523	-12.4807	4.2679	-25.8781	2.21585	-13.8297	-5.56465	-30.146	-0.8099	-14.2074	5.8877	-14.6396	0.26845	-0.648375	18.1522	-4.05177	-3.24188	-13.2906	-3.72645	-11.8846	15.1265	-18.3684	2.16125	-11.8846	9.72563	-2.31595	-3.7856	-4.55	-2.275	-43.225	2.275	-20.475	25.025	12.0074	9.76657	26.0761	12.4283	-6.07198	10.3535	0.152425	-1.36727
38	-1.08062	1.45827	-4.64555	-2.16125	-10.9132	0.702975	-12.0484	4.70015	-26.3104	1.7836	-13.3975	-6.42915	-31.0105	-0.8099	-12.9106	6.31995	-14.2074	0.26845	-0.648375	20.3135	-4.05177	-3.24188	-12.8583	-1.99745	-11.8846	15.5587	-17.5039	2.5935	-12.3168	11.4546	-1.95878	-4.61142	-4.55	0	-43.225	2.275	-25.025	25.025	12.5762	10.0145	27.548	13.6932	-6.279	11.1066	0.143325	-1.83365
39	-1.08062	1.89052	-5.9423	-2.16125	-11.3454	0.270725	-11.6162	5.1324	-26.7426	1.35135	-12.9652	-7.29365	-31.875	-0.8099	-11.6139	6.7522	-13.7751	0.26845	-0.648375	22.4747	-4.05177	-3.24188	-12.4261	-0.26845	-11.8846	15.991	-16.6394	3.02575	-12.7491	13.1836	-1.6835	-4.35435	-4.55	0	-43.225	2.275	-25.025	25.025	13.3474	10.4832	27.6162	15.1219	-6.96833	12.9106	0.45955	-2.66402
40	-0.216125	3.18727	-5.51005	-2.5935	-11.3454	-0.161525	-12.0484	5.1324	-27.1749	1.7836	-12.1007	-7.29365	-33.604	0.0546	-12.4784	6.7522	-14.6396	2.4297	-1.08062	23.3392	-2.32277	-3.67413	-13.2906	-1.13295	-11.6685	16.8555	-16.2071	3.89025	-12.9652	14.4804	-1.9656	-4.03358	-4.55	0	-43.225	0	-25.025	25.025	13.8252	11.516	28.5399	15.8909	-8.27418	14.9581	0.42315	-1.41505
41	0.648375	4.48402	-5.0778	-3.02575	-11.3454	-0.593775	-12.4807	5.1324	-27.6071	2.21585	-11.2362	-7.29365	-35.333	0.9191	-13.3429	6.7522	-15.5041	4.59095	-1.94512	22.907	-0.593775	-4.10637	-14.1551	-1.99745	-11.2362	18.1522	-16.2071	5.187	-12.9652	15.3449	-1.8473	-4.04723	-6.825	0	-47.775	0	-27.3	25.025	13.9981	11.8323	28.5353	16.6029	-9.2001	17.4948	1.25808	-0.443625
42	1.08063	4.70015	-5.51005	-3.24188	-11.5616	-0.37765	-12.6968	4.91628	-28.2555	2.43197	-11.4523	-6.42915	-36.4114	1.56747	-14.2074	7.83283	-15.9364	5.23933	-2.80963	22.4747	0.270725	-4.75475	-14.8034	-2.86195	-10.804	19.449	-16.2071	6.48375	-12.9652	16.2094	-1.74037	-3.7128	-6.825	0	-50.05	0	-29.575	25.025	14.3211	12.5216	28.9062	17.3946	-9.53225	18.3047	1.52652	-0.43225
43	1.08063	3.83565	-6.8068	-3.24188	-11.9938	0.48685	-12.6968	4.48402	-29.12	2.43197	-12.7491	-4.70015	-36.8436	1.99972	-15.0719	9.99408	-15.9364	4.37482	-1.94512	22.907	0.270725	-5.61925	-15.2357	-3.72645	-11.2362	19.8812	-16.6394	6.0515	-12.9652	16.2094	-1.81318	-3.86977	-6.825	0	-50.05	0	-31.85	25.025	15.404	13.4134	29.3702	19.1828	-10.6584	19.1328	1.81545	0.338975
44	1.08063	2.97115	-8.10355	-3.24188	-12.426	1.35135	-12.6968	4.05178	-29.9822	2.43197	-14.0459	-2.97115	-37.2759	2.43197	-15.9364	12.1553	-15.9364	3.51032	-1.08062	23.3392	0.270725	-6.48375	-15.6679	-4.59095	-11.6685	20.3135	-17.0716	5.61925	-12.9652	16.2094	-2.26817	-4.1951	-9.1	0	-52.325	0	-34.125	25.025	15.8477	13.5181	29.3702	20.5091	-11.1657	20.632	0.307125	0.19565
45	0.648375	2.97115	-7.23905	-3.67413	-10.6971	0.48685	-12.2645	4.48402	-29.5522	2.43197	-14.0459	-4.2679	-37.7081	2.43197	-15.0719	12.1553	-15.9364	3.07808	-0.8645	24.2037	-0.161525	-5.61925	-15.6679	-4.59095	-11.8846	20.9619	-17.2877	5.61925	-12.9652	16.6416	-2.15443	-3.65365	-9.1	0	-52.325	0	-34.125	25.025	16.3845	14.8717	29.2975	20.6001	-12.2577	22.138	0.539175	0.188825
46	0.216125	2.97115	-6.37455	-4.10637	-8.96805	-0.37765	-11.8323	4.91628	-29.12	2.43197	-14.0459	-5.56465	-38.1404	2.43197	-14.2074	12.1553	-15.9364	2.64583	-1.29675	25.5005	-0.593775	-4.75475	-15.6679	-4.59095	-11.8846	21.8263	-17.2877	6.0515	-12.9652	17.5061	-1.89507	-4.0404	-11.375	-2.275	-52.325	0	-36.4	25.025	17.0284	14.6191	29.3839	22.3906	-12.9516	22.9775	0.857675	0.589225
47	0	2.97115	-6.37455	-4.75475	-8.96805	-0.161525	-11.6162	5.1324	-29.12	3.08035	-14.4781	-5.78078	-38.5726	1.7836	-14.2074	12.8037	-16.1525	2.86195	-1.729	26.7972	-0.161525	-4.53863	-16.3163	-4.59095	-11.8846	22.6908	-17.2877	6.48375	-12.9652	18.3706	-1.74492	-3.39202	-11.375	-2.275	-52.325	2.275	-38.675	25.025	17.3105	15.809	29.1405	24.4199	-14.3052	24.5359	1.11248	1.32632
48	0	2.97115	-7.23905	-5.61925	-10.6971	1.13523	-11.6162	5.1324	-29.5522	4.3771	-15.3426	-4.91628	-39.0049	0.48685	-15.0719	14.1005	-16.5847	3.72645	-1.29675	26.7972	1.13522	-4.97087	-17.6131	-4.59095	-11.4523	23.5553	-17.2877	5.61925	-12.9652	18.3706	-2.2204	-3.41705	-13.65	-2.275	-52.325	4.55	-43.225	25.025	17.4015	17.0284	28.6491	25.6279	-15.9728	25.4618	0.639275	0.816725
49	0	2.97115	-8.10355	-6.48375	-12.426	2.43198	-11.6162	5.1324	-29.9822	5.67385	-16.2071	-4.05178	-39.4371	-0.8099	-15.9364	15.3972	-17.017	4.59095	-0.8645	26.7972	2.43197	-5.40312	-18.9098	-4.59095	-11.0201	24.4176	-17.2877	4.75475	-12.9652	18.3706	-1.95423	-3.43525	-13.65	-2.275	-56.875	6.825	-54.6	25.025	17.7859	17.1103	28.4102	27.2477	-16.4141	27.5935	0.04095	1.3377
50	0	2.97115	-8.5358	-4.3225	-11.5616	2.86423	-10.7516	5.56465	-30.4145	4.80935	-16.6393	-4.05178	-39.8694	0.0546	-15.9364	16.2617	-17.8815	6.31995	-1.08062	27.8779	1.99973	-4.97087	-18.9098	-4.59095	-11.0201	25.066	-17.2877	4.3225	-13.1814	18.8029	-2.17262	-4.22695	-13.65	-2.275	-59.15	6.825	-59.15	25.025	18.2796	18.0954	28.21	28.9926	-17.4583	28.2214	-0.116025	1.74037
51	0	2.97115	-8.96805	-2.16125	-10.6971	3.29648	-9.88715	5.9969	-30.8467	3.94485	-17.0716	-4.05178	-40.3016	0.9191	-15.9364	17.1262	-18.746	8.04895	-1.94512	30.0391	1.56747	-4.53863	-18.9098	-4.59095	-11.4523	25.4982	-17.2877	4.3225	-13.6136	19.6674	-2.19083	-3.58085	-13.65	0	-59.15	6.825	-63.7	22.75	18.4775	18.1932	27.8392	29.5386	-18.7778	29.5705	-0.1638	2.8028
52	0.216125	2.97115	-9.61642	-1.08063	-10.2648	3.72873	-9.67102	6.42915	-30.8467	3.5126	-17.5038	-4.2679	-40.95	1.56747	-15.7203	17.7746	-19.6105	9.12958	-2.80963	32.2004	1.35135	-4.53863	-19.1259	-4.1587	-11.8846	25.9305	-17.2877	4.3225	-14.0458	20.5296	-2.4388	-3.30102	-13.65	0	-61.425	11.375	-77.35	22.75	18.9325	18.9598	27.3842	31.6475	-19.2078	30.4236	0.1274	3.53535
53	0.648375	2.97115	-10.4809	-1.08063	-10.2648	4.16098	-10.1033	6.85912	-30.4145	3.5126	-17.9361	-4.70015	-41.8145	1.99972	-15.288	18.2046	-20.475	9.56182	-1.94512	32.6326	1.35135	-4.97087	-19.5582	-3.2942	-11.8846	25.9305	-18.5845	4.75475	-13.6136	20.9619	-2.06797	-3.3397	-13.65	0	-61.425	11.375	-81.9	20.475	19.9517	19.747	26.9747	33.9498	-19.8699	31.9342	0.77805	4.80935
54	1.08063	2.97115	-11.3454	-1.08063	-10.2648	4.59323	-10.5355	7.29138	-29.9822	3.5126	-18.3684	-5.1324	-42.679	2.43197	-14.8557	18.6368	-21.3395	9.99408	-1.08062	33.0649	1.35135	-5.40312	-19.9904	-2.4297	-11.8846	25.9305	-19.8812	5.187	-13.1814	21.3941	-2.38648	-2.79143	-18.2	2.275	-61.425	13.65	-81.9	20.475	20.1178	20.2043	27.0111	34.8689	-20.6888	33.8497	1.3468	6.5702
55	0.216125	2.5389	-10.9132	-2.37738	-10.6971	4.16098	-10.9678	7.29138	-31.279	4.3771	-18.3684	-5.1324	-42.679	1.99972	-13.9913	19.069	-22.204	11.2908	-0.43225	33.281	2.21585	-5.40312	-19.9904	-3.2942	-11.6685	25.9305	-20.7457	5.83537	-12.9652	21.8264	-2.57985	-3.3852	-18.2	2.275	-61.425	15.925	-81.9	20.475	20.7821	20.8072	26.5333	35.4945	-21.0711	35.1829	1.82683	7.59168
56	-0.648375	2.10665	-10.4809	-3.67413	-11.1293	3.72873	-11.4	7.29138	-32.5757	5.2416	-18.3684	-5.1324	-42.679	1.56747	-13.1268	19.5013	-23.0685	12.5876	0	33.281	3.08035	-5.40312	-19.9904	-4.1587	-11.2362	25.9305	-21.178	6.69988	-12.9652	22.2586	-2.17945	-3.18955	-18.2	2.275	-61.425	15.925	-84.175	20.475	21.1347	21.6466	26.5652	36.4842	-21.84	35.9632	2.37965	8.03075
57	-0.8645	2.10665	-10.697	-4.75475	-11.1293	3.72873	-11.1839	7.93975	-33.2241	5.67385	-18.8006	-4.48403	-43.3274	1.7836	-13.1268	20.1497	-23.2846	13.0198	0.43225	33.281	3.94485	-4.53863	-20.2066	-4.80708	-10.804	25.9305	-21.6102	7.56438	-12.9652	22.6909	-1.98607	-2.9848	-20.475	2.275	-61.425	15.925	-95.55	18.2	21.4191	22.2313	26.183	37.947	-21.906	37.6331	3.36245	8.7815
58	-0.43225	2.5389	-11.5615	-5.61925	-10.6971	4.16098	-10.3194	9.2365	-33.2241	5.67385	-19.6651	-3.18728	-44.6241	2.6481	-13.9913	21.0142	-22.8524	12.5876	0.8645	33.7132	4.80935	-2.80962	-20.6388	-5.23933	-11.2362	25.9305	-21.6102	7.99662	-12.533	23.1231	-2.25225	-3.0212	-20.475	2.275	-61.425	15.925	-95.55	18.2	21.6079	22.229	25.207	38.7023	-22.9229	39.519	3.56948	9.38437
59	0	2.97115	-12.426	-6.48375	-10.2648	4.59323	-9.4549	10.5332	-33.2241	5.67385	-20.5296	-1.89053	-45.9209	3.5126	-14.8557	21.8787	-22.4201	12.1553	1.29675	34.1455	5.67385	-1.08063	-21.0711	-5.67158	-11.6685	25.9305	-21.6102	8.42887	-12.1007	23.5554	-2.1385	-2.84375	-22.75	2.275	-61.425	18.2	-95.55	18.2	21.9992	22.386	25.0296	39.312	-23.8284	40.6474	3.37838	9.54363
60	-0.43225	2.10665	-10.697	-6.0515	-10.2648	4.59323	-9.4549	10.101	-33.2241	5.67385	-20.5296	-1.02603	-46.3531	3.08035	-13.9913	22.3109	-22.4201	12.1553	1.729	34.7939	5.67385	-1.51288	-20.6388	-5.67158	-11.4523	26.1466	-21.3941	9.29337	-12.3168	23.7715	-2.29775	-2.34553	-25.025	2.275	-63.7	20.475	-97.825	18.2	22.3178	23.3233	24.2993	39.4985	-24.3129	41.9556	5.59195	9.6551
61	-0.8645	1.24215	-8.96805	-5.61925	-10.2648	4.59323	-9.4549	9.66875	-33.2241	5.67385	-20.5296	-0.161525	-46.7854	2.6481	-13.1268	22.7432	-22.4201	12.1553	2.16125	35.6584	5.67385	-1.94513	-20.2066	-5.67158	-10.5878	26.5788	-20.9619	10.5901	-13.1814	23.7715	-2.3387	-2.6936	-25.025	2.275	-68.25	25.025	-97.825	18.2	22.6954	24.3107	23.999	40.7703	-24.8748	42.8883	4.94358	10.4377
62	-1.08062	1.24215	-7.88742	-4.97087	-10.6971	4.59323	-9.4549	9.02037	-33.6563	6.32222	-20.5296	0.48685	-47.2176	2.21585	-13.1268	24.4722	-22.8524	12.5876	2.5935	36.5206	5.88997	-1.94513	-19.9904	-5.45545	-9.72335	27.0111	-20.5296	11.8869	-14.0458	23.7715	-2.32278	-2.29093	-25.025	2.275	-68.25	25.025	-102.375	18.2	23.2255	23.9375	22.7591	41.3322	-25.5414	44.1578	4.85712	10.8904
63	-1.08062	2.10665	-7.45517	-4.10637	-11.5616	4.59323	-9.4549	8.15587	-34.5208	7.61897	-20.5296	0.9191	-47.6499	1.7836	-13.9913	27.4979	-23.7169	13.4521	3.89025	38.2496	6.32223	-1.51288	-19.9904	-5.0232	-9.72335	26.5788	-21.8264	11.4546	-13.1814	23.3392	-2.4206	-2.87788	-25.025	2.275	-68.25	25.025	-102.375	18.2	22.8911	24.5905	22.1994	42.0056	-26.142	44.5832	5.10738	10.7198
64	-1.08062	2.97115	-7.02292	-3.24188	-12.426	4.59323	-9.4549	7.29138	-35.3854	8.91572	-20.5296	1.35135	-48.0821	1.35135	-14.8557	30.5237	-24.5814	14.3166	5.187	39.9786	6.75448	-1.08063	-19.9904	-4.59095	-9.72335	26.1466	-23.1231	11.0224	-12.3168	22.907	-2.24315	-2.63218	-27.3	2.275	-68.25	25.025	-104.65	18.2	23.7897	24.8657	21.1689	42.5948	-26.6744	45.9778	5.03458	11.1839
65	-1.08062	2.97115	-7.88742	-4.53863	-11.5616	5.45773	-9.4549	8.15587	-36.2499	8.48347	-21.3941	2.6481	-49.8111	2.21585	-14.8557	30.0914	-25.0136	14.7488	6.0515	41.0592	7.18673	-2.37738	-20.4227	-5.0232	-10.3717	26.1466	-23.1231	11.2385	-12.1007	22.4747	-2.36373	-2.639	-29.575	2.275	-68.25	25.025	-104.65	20.475	23.6259	25.546	20.4431	42.977	-26.8313	47.229	4.85258	11.648
66	-1.08062	2.97115	-8.75192	-5.83537	-10.6971	6.32223	-9.4549	9.02037	-37.1144	8.05122	-22.2586	3.94485	-51.5401	3.08035	-14.8557	29.6592	-25.4459	15.1811	6.48375	41.4915	7.61897	-3.67413	-20.8549	-5.45545	-11.6685	26.5788	-21.8264	12.103	-12.533	22.0425	-2.62307	-2.7209	-29.575	2.275	-68.25	25.025	-106.925	20.475	24.0445	26.0624	19.8107	44.5536	-27.821	46.7717	5.62153	11.921
67	-1.29675	2.75502	-9.61642	-6.26762	-10.4809	7.18673	-9.02265	9.88488	-37.5466	8.48347	-22.2586	4.59322	-52.4046	3.08035	-14.8557	30.3075	-25.662	15.8295	6.916	41.9237	8.26735	-4.10637	-21.2872	-5.67158	-12.9652	27.0111	-20.5296	12.9675	-12.9652	21.6102	-2.8028	-1.7563	-29.575	2.275	-68.25	25.025	-111.475	20.475	23.8352	26.0032	18.8825	45.1883	-29.1314	47.5202	5.0141	11.8277
68	-1.729	2.32277	-10.4809	-5.83537	-10.9132	8.05123	-8.15815	10.7494	-37.5466	9.78022	-21.3941	4.59322	-52.4046	2.21585	-14.8557	32.0365	-25.662	16.6939	6.0515	41.9237	9.13185	-3.67413	-21.7194	-5.67158	-12.533	27.4433	-21.8264	13.3998	-12.533	23.3392	-2.59805	-2.27955	-29.575	2.275	-72.8	27.3	-116.025	20.475	24.2083	26.2876	18.4548	45.7775	-30.4167	47.5976	4.62963	12.326
69	-2.16125	1.89052	-11.3454	-5.40312	-11.3454	8.91345	-7.29365	11.6139	-37.5466	11.077	-20.5296	4.59322	-52.4046	1.35135	-14.8557	33.7656	-25.662	17.5584	5.187	41.9237	9.99635	-3.24188	-22.1517	-5.67158	-12.1007	27.8756	-23.1231	13.832	-12.1007	25.0682	-2.58212	-2.1203	-29.575	2.275	-72.8	27.3	-118.3	20.475	24.0854	26.6653	18.134	45.2407	-32.0001	48.6031	5.45545	12.2281
70	-1.729	2.32277	-11.3454	-6.26762	-10.9132	8.91345	-5.56465	12.9106	-38.8433	10.6447	-20.0974	5.02547	-52.8369	2.21585	-13.9913	35.9268	-26.5265	17.1262	4.97088	42.1398	10.8608	-1.94513	-20.8549	-5.67158	-11.8846	28.3078	-23.1231	14.4804	-11.8846	25.9327	-2.43425	-1.53335	-31.85	2.275	-72.8	31.85	-118.3	20.475	24.5859	27.0202	16.6962	45.7298	-32.4279	48.6395	4.4772	12.1349
71	-1.29675	2.75502	-11.3454	-7.13212	-10.4809	8.91345	-3.83565	14.2074	-40.1401	10.2125	-19.6651	5.45772	-53.2691	3.08035	-13.1268	38.088	-27.391	16.6939	5.40313	42.5721	11.7254	-0.648375	-19.5582	-5.67158	-11.8846	28.7401	-21.8264	15.3449	-11.8846	25.9327	-2.62535	-1.5106	-34.125	2.275	-72.8	31.85	-125.125	11.375	24.2697	27.8528	16.5097	46.5556	-33.1536	49.9271	6.0151	11.9642
72	-1.29675	2.75502	-11.7777	-7.7805	-10.0487	8.91345	-2.75502	14.6396	-41.0046	9.99635	-19.6651	7.40285	-53.9175	3.5126	-13.559	39.817	-28.2555	17.1262	5.83538	43.0043	12.806	0	-18.2614	-5.8877	-11.8846	29.1723	-20.5296	16.2094	-11.8846	25.9327	-2.4115	-1.05788	-34.125	2.275	-72.8	31.85	-127.4	13.65	23.7351	28.0803	15.8545	46.1961	-33.8861	49.5973	6.98198	11.6685
73	-1.729	2.32277	-12.6422	-8.21275	-9.61642	8.91345	-2.32278	14.2074	-41.4368	9.99635	-20.0974	10.8608	-54.782	3.5126	-15.288	41.1138	-29.12	18.423	5.83538	43.0043	14.1027	0	-16.9647	-6.31995	-12.3168	28.3078	-20.9619	15.3449	-12.3168	24.636	-2.36373	-1.56748	-36.4	4.55	-72.8	34.125	-127.4	13.65	23.5781	28.1008	14.7647	47.0106	-34.8666	50.9577	7.15487	11.5047
74	-2.16125	1.89052	-13.5067	-8.645	-9.18417	8.91345	-1.89053	13.7751	-41.8691	9.99635	-20.5296	14.3166	-55.6465	3.5126	-17.017	42.4083	-29.9845	19.7197	5.83538	43.0043	15.3995	0	-15.6679	-6.7522	-12.7491	27.4433	-21.3941	14.4804	-12.7491	23.3392	-2.52525	-1.26035	-36.4	4.55	-72.8	34.125	-127.4	11.375	23.9922	28.4284	13.9344	46.9719	-35.1351	51.4651	6.94558	11.5957
75	-3.02575	1.45827	-13.0744	-8.645	-10.4809	9.3457	-2.75502	14.6396	-41.8691	11.2931	-19.6651	14.7488	-55.6465	3.5126	-17.8815	42.8405	-29.5522	19.2875	6.26763	43.4366	15.8317	0.43225	-14.8034	-6.31995	-13.1813	27.6594	-21.178	14.6965	-12.9652	23.3392	-2.25225	-1.16025	-36.4	4.55	-75.075	34.125	-129.675	9.1	24.6292	28.9789	13.6045	47.0925	-36.3863	52.3887	7.89425	12.4329
76	-3.89025	1.02602	-12.6422	-8.645	-11.7777	9.77795	-3.61953	15.5041	-41.8691	12.5876	-18.8006	15.1811	-55.6465	3.5126	-18.746	43.2728	-29.12	18.8552	7.13213	44.3011	16.264	0.8645	-13.9389	-5.8877	-13.6136	28.9562	-20.3135	15.9932	-12.9652	24.636	-2.4843	-1.44917	-36.4	4.55	-75.075	34.125	-134.225	6.825	24.4927	29.12	12.1872	47.2267	-36.9733	52.9938	8.10127	10.9746
77	-4.10637	1.02602	-12.8583	-8.21275	-11.5616	9.56182	-3.4034	15.9364	-41.653	12.8037	-19.0167	15.3972	-56.2949	3.29647	-19.3944	43.2728	-29.12	19.0713	7.99663	45.1656	16.6962	0.8645	-13.2906	-5.8877	-14.0458	30.2529	-19.449	17.2877	-12.9652	25.9327	-2.30912	-1.79953	-38.675	6.825	-77.35	34.125	-134.225	6.825	25.2821	29.9936	11.9119	46.9059	-37.7445	53.9425	9.3275	13.1905
78	-3.67412	1.45827	-13.7228	-7.34825	-9.83255	8.69732	-2.10665	15.9364	-41.2207	11.9415	-20.3135	15.3972	-57.5916	2.86422	-19.8266	42.8405	-29.5522	19.9358	7.56438	45.5978	17.1262	0.43225	-12.8583	-6.31995	-14.4781	31.1174	-20.3135	20.7457	-12.9652	27.2295	-2.35235	-1.55155	-38.675	9.1	-77.35	34.125	-134.225	6.825	25.141	30.3508	11.6002	47.4406	-38.0039	54.6614	9.6915	12.947
79	-3.24187	1.89052	-14.585	-6.48375	-8.10355	7.8351	-0.8099	15.9364	-40.7885	11.077	-21.6102	15.3972	-58.8884	2.43197	-20.2589	42.4083	-29.9845	20.798	7.13213	46.0301	17.5584	0	-12.4261	-6.7522	-14.9103	31.9819	-21.178	24.2037	-12.9652	28.5262	-2.4388	-1.52425	-38.675	11.375	-77.35	36.4	-136.5	6.825	25.7052	31.1083	11.5593	46.5465	-38.7319	55.3212	10.4855	13.625
80	-3.67412	1.45827	-15.0173	-6.916	-8.96805	8.69732	0.0546	16.3686	-41.653	11.5092	-20.7457	16.2617	-59.7506	3.29647	-20.2589	45.434	-29.9845	20.798	6.916	46.4623	18.4229	0.8645	-11.9938	-6.7522	-14.6942	33.0626	-21.6102	26.5811	-13.1814	29.3907	-2.38875	-1.5561	-38.675	11.375	-77.35	36.4	-138.775	9.1	25.8781	31.2335	11.3955	46.319	-39.0572	55.7261	10.101	14.2529
81	-4.10637	1.02602	-15.4495	-7.34825	-9.83255	9.56182	0.9191	16.8009	-42.5175	11.9415	-19.8812	17.1262	-60.6151	4.16097	-20.2589	48.4598	-29.9845	20.798	6.916	46.8946	19.2875	1.72673	-11.5616	-6.7522	-13.8297	34.3593	-21.6102	27.8779	-13.6136	29.823	-2.1112	-0.53235	-40.95	13.65	-79.625	36.4	-141.05	11.375	25.348	31.1789	11.0565	45.9982	-38.948	56.8136	10.7312	14.5077
82	-4.3225	0.8099	-15.4495	-7.34825	-10.4809	10.4263	1.13522	17.4493	-43.1658	12.8037	-19.449	17.5584	-61.2635	4.3771	-20.6911	51.2694	-30.849	21.4464	6.916	47.3268	19.7197	1.94285	-11.3454	-6.7522	-12.9652	35.6561	-21.6102	29.1746	-14.0458	30.2552	-1.8655	-0.7553	-40.95	13.65	-84.175	38.675	-138.775	11.375	25.9782	31.4337	10.4695	45.1246	-38.3883	56.5087	10.6038	14.56
83	-4.3225	0.8099	-15.0173	-6.916	-10.9132	11.2908	0.702975	18.3138	-43.5981	14.1005	-19.449	17.5584	-61.6957	3.94485	-21.5556	53.8629	-32.5757	22.7432	6.916	46.4623	19.7197	1.5106	-11.3454	-6.7522	-13.3975	35.6561	-20.7457	30.0391	-13.6136	30.6875	-1.94512	-0.985075	-40.95	13.65	-81.9	40.95	-138.775	11.375	26.8928	32.305	9.55728	45.3908	-38.5521	56.4223	11.35	14.3916
84	-4.3225	0.8099	-14.585	-6.48375	-11.3454	12.1553	0.270725	19.1783	-44.0303	15.3972	-19.449	17.5584	-62.128	3.5126	-22.4201	56.4564	-34.3047	24.0399	6.916	45.5978	19.7197	1.07835	-11.3454	-6.7522	-13.8297	35.6561	-19.8812	30.9036	-13.1814	31.1197	-1.5288	-0.948675	-40.95	13.65	-81.9	40.95	-138.775	11.375	26.3718	31.8204	9.46173	44.1646	-39.5759	56.6566	10.3399	15.6497
85	-4.3225	1.24215	-15.0173	-6.48375	-10.4809	12.5876	0.702975	19.6105	-44.0303	15.8295	-18.1522	19.7197	-63.4247	4.3771	-21.1234	54.2952	-35.6015	25.3367	6.69988	45.814	20.5842	1.94285	-11.3454	-7.6167	-14.262	35.44	-20.0974	31.552	-13.6136	31.3359	-1.61753	-0.275275	-40.95	13.65	-81.9	40.95	-138.775	11.375	26.7358	31.9797	9.19327	44.6423	-39.5236	57.3209	11.218	15.1424
86	-4.3225	1.6744	-15.4495	-6.48375	-9.61642	13.0198	1.13522	20.0427	-44.0303	16.2617	-16.8555	21.8809	-64.7215	5.2416	-19.8266	52.1339	-36.8982	26.6334	6.26763	47.1107	21.4487	2.80735	-11.3454	-8.4812	-14.6942	35.0077	-21.3941	31.9842	-14.9103	31.3359	-1.6289	-0.6279	-40.95	13.65	-84.175	40.95	-138.775	11.375	26.8746	31.9956	8.88615	43.4707	-40.7521	58.7018	10.4104	15.9296
87	-4.3225	1.24215	-15.8818	-6.48375	-9.18417	13.0198	1.7836	20.475	-44.4626	16.6939	-16.8555	23.3938	-65.3698	5.88997	-19.3944	52.35	-37.5466	27.2818	5.83538	48.4075	22.0971	3.02348	-11.5616	-9.12958	-15.1265	34.5755	-22.6909	32.4165	-16.2071	31.3359	-2.04295	-0.693875	-40.95	13.65	-84.175	40.95	-138.775	11.375	27.0338	32.6622	8.77695	42.6608	-41.4869	59.6482	10.4741	16.4027
88	-4.3225	-0.0546	-16.314	-6.48375	-9.18417	12.5876	2.6481	20.9072	-45.3271	17.1262	-18.1522	24.2583	-65.3698	6.32222	-19.8266	54.9435	-37.5466	27.2818	5.40313	47.9752	22.5293	2.59123	-11.9938	-9.56183	-15.5587	35.44	-21.8264	33.281	-16.6394	31.3359	-1.81772	-0.3094	-43.225	13.65	-86.45	40.95	-138.775	11.375	27.0133	32.396	8.44025	41.6666	-42.3446	59.2979	10.4764	16.7872
89	-4.3225	-1.34908	-16.7463	-6.48375	-9.18417	12.1553	3.5126	21.3395	-46.1916	17.5584	-19.449	25.1228	-65.3698	6.75447	-20.2589	57.537	-37.5466	27.2818	4.97088	47.543	22.9616	2.15898	-12.4261	-9.99408	-15.991	36.3045	-20.9619	34.1455	-17.0716	31.3359	-1.78815	-0.2457	-43.225	13.65	-86.45	40.95	-138.775	11.375	27.4865	32.6053	8.12402	40.718	-43.0066	59.4344	10.8267	16.769
90	-4.75475	-0.916825	-16.314	-6.0515	-9.18417	12.5876	4.3771	22.6363	-45.3271	17.5584	-20.3135	25.9873	-66.2343	5.88997	-21.1234	59.266	-37.5466	27.714	5.187	47.7591	23.3938	3.45573	-11.9938	-9.56183	-16.2071	36.9528	-20.5296	35.01	-17.0716	31.9842	-2.07935	0.25025	-43.225	13.65	-86.45	40.95	-136.5	11.375	27.275	32.9397	7.87377	40.5018	-43.6709	59.7074	10.3672	16.8646
91	-5.187	-0.48685	-15.8818	-5.61925	-9.18417	13.0198	5.2416	23.933	-44.4626	17.5584	-21.178	26.8518	-67.0988	5.02547	-21.9879	60.995	-37.5466	28.1463	6.0515	48.6236	23.8261	4.75248	-11.5616	-9.12958	-16.2071	37.3851	-20.5296	35.8745	-16.6394	33.281	-1.7017	-0.3094	-43.225	13.65	-86.45	40.95	-136.5	11.375	27.6026	32.8351	7.91927	39.3871	-44.2624	60.6265	10.0418	17.8542
92	-5.40312	-0.270725	-16.5301	-5.187	-9.18417	13.8843	5.88997	24.5814	-44.2465	18.2068	-20.9619	28.3647	-67.5311	5.2416	-22.4201	60.995	-37.5466	28.7947	6.916	49.4881	23.1777	5.18472	-11.1293	-8.91345	-16.2071	37.8173	-20.5296	36.739	-16.2071	34.5777	-1.40823	0.093275	-43.225	13.65	-88.725	40.95	-136.5	15.925	28.1577	33.2241	8.1627	38.7819	-45.0382	59.5004	10.0145	17.5266
93	-5.40312	-0.270725	-18.2591	-4.75475	-9.18417	15.1811	6.32223	24.5814	-44.6787	19.5036	-19.6651	30.5259	-67.5311	6.53835	-22.4201	59.266	-37.5466	29.6592	7.34825	50.7848	21.4487	4.75248	-10.6971	-8.91345	-15.7749	37.8173	-20.5296	37.1712	-16.6394	34.5777	-0.980525	0.35945	-43.225	13.65	-88.725	40.95	-136.5	18.2	27.0952	33.8315	7.90107	38.2086	-45.6501	59.4571	10.7494	18.564
94	-5.40312	-0.270725	-19.9881	-4.3225	-9.18417	16.4778	6.75448	24.5814	-45.111	20.8003	-18.3684	32.6872	-67.5311	7.8351	-22.4201	57.537	-37.5466	30.5237	7.7805	52.0816	19.7197	4.32023	-10.2648	-8.91345	-15.3426	37.8173	-20.5296	37.6035	-17.0716	34.5777	-0.580125	0.7007	-43.225	13.65	-93.275	43.225	-138.775	27.3	27.143	33.1012	8.04212	36.8027	-46.5237	59.4776	11.5365	20.8731
95	-4.97088	0.593775	-18.2591	-3.89025	-9.18417	15.6133	7.18445	24.5814	-46.84	21.2326	-17.9361	32.6872	-68.3956	7.8351	-23.2846	59.266	-38.8434	32.2527	7.7805	52.73	21.0165	5.18472	-10.2648	-10.2102	-15.1265	38.2496	-20.9619	38.2519	-17.0716	35.01	-0.57785	0.407225	-45.5	13.65	-93.275	43.225	-141.05	27.3	27.3501	33.2423	7.8078	36.3045	-46.7467	59.7984	10.9132	22.0993
96	-4.53862	1.45827	-16.5301	-3.458	-9.18417	14.7488	7.6167	24.5814	-48.569	21.6648	-17.5038	32.6872	-69.2601	7.8351	-24.1491	60.995	-40.1401	33.9817	7.34825	52.73	22.3132	6.04922	-10.2648	-11.507	-15.1265	39.1141	-21.8264	39.1164	-16.6394	35.8745	-0.429975	1.13522	-45.5	15.925	-93.275	45.5	-141.05	31.85	28.3033	34.332	8.59495	35.0782	-46.476	59.919	11.5707	22.1517
97	-4.3225	1.89052	-16.0979	-3.458	-8.5358	14.7488	8.04895	25.2297	-49.2174	22.7455	-17.0716	33.3356	-69.9085	7.8351	-25.0136	62.9402	-40.7885	34.63	6.916	52.73	22.9616	6.04922	-10.4809	-11.2908	-15.1265	39.9786	-22.6909	39.9809	-16.2071	36.739	-0.489125	1.54473	-45.5	18.2	-95.55	47.775	-141.05	31.85	28.2054	33.7815	8.51532	34.1864	-46.9037	59.9372	12.0439	23.2641
98	-4.3225	1.89052	-16.9624	-3.89025	-7.23905	15.6133	8.4812	26.5265	-48.7851	24.4745	-16.6393	34.6323	-70.3407	7.8351	-25.8781	65.0991	-40.7885	34.1978	7.34825	52.2977	22.9616	5.18472	-10.9132	-9.56183	-15.991	40.8431	-21.3941	39.1164	-16.2071	37.6035	-0.384475	1.47875	-45.5	18.2	-95.55	47.775	-143.325	34.125	28.5103	34.1773	8.6905	33.7519	-46.9037	58.4789	12.3737	22.7727
99	-4.3225	1.89052	-17.8269	-4.3225	-5.94458	16.4778	8.91345	27.8233	-48.3528	26.2034	-16.2071	35.9268	-70.773	7.8351	-26.7426	67.2604	-40.7885	33.7655	7.7805	51.8655	22.9616	4.32023	-11.3454	-7.83283	-16.8555	41.7076	-20.0974	38.2519	-16.2071	38.468	-0.0455	1.4105	-45.5	18.2	-95.55	47.775	-147.875	40.95	28.599	34.1819	8.35835	32.901	-46.2553	58.4379	12.1053	22.5908
100	-4.75475	1.89052	-19.5559	-4.3225	-6.37682	16.4778	9.77795	27.391	-48.3528	26.2034	-17.0716	36.7913	-72.502	8.26735	-25.0136	66.8281	-41.653	34.1978	7.99663	52.2977	24.2583	4.75248	-10.4809	-8.69733	-16.8555	42.356	-19.449	38.2519	-16.2071	38.468	-0.5733	1.77678	-45.5	18.2	-95.55	47.775	-154.7	50.05	28.417	34.266	8.25598	31.6452	-46.071	58.7246	12.3419	23.3392
101	-5.187	1.89052	-21.2849	-4.3225	-6.8068	16.4778	10.6425	26.9588	-48.3528	26.2034	-17.9361	37.6558	-74.231	8.6996	-23.2846	66.3959	-42.5175	34.63	7.99663	53.5945	25.5551	5.18472	-9.61643	-9.56183	-15.991	42.7882	-19.449	39.1164	-16.2071	37.6035	-0.36855	2.4843	-45.5	18.2	-95.55	47.775	-154.7	50.05	28.3738	33.4971	8.81562	31.0583	-45.7411	59.4457	11.6821	23.2733
102	-5.187	1.6744	-22.3655	-4.10637	-6.59295	16.6939	10.8586	27.6071	-48.7851	26.8518	-18.8006	38.088	-74.6632	8.48347	-22.4201	66.612	-43.1659	34.8462	7.99663	54.8912	26.6357	5.61698	-8.96805	-9.77795	-15.1265	43.2205	-19.449	39.9809	-16.2071	36.739	-0.091	3.52398	-45.5	18.2	-97.825	50.05	-154.7	54.6	28.5786	33.9976	9.0545	31.0219	-45.6501	59.1432	12.0484	23.337
103	-4.75475	1.24215	-22.7978	-3.67413	-5.72845	17.1262	10.4263	29.3361	-49.6496	28.1486	-19.6651	38.088	-73.7987	7.61897	-22.4201	67.4765	-43.5981	34.8462	8.42888	54.459	27.5002	6.04922	-8.5358	-9.3457	-15.5587	43.2205	-20.3135	39.9809	-16.2071	37.1712	-0.075075	2.78005	-45.5	18.2	-100.1	50.05	-156.975	56.875	28.3033	33.6313	9.25015	30.8854	-45.6274	59.2478	11.6571	22.998
104	-4.3225	0.8099	-23.23	-3.24188	-4.86395	17.5584	9.99408	31.0629	-50.5141	29.4453	-20.5296	38.088	-72.9342	6.75447	-22.4201	68.341	-44.0304	34.8462	8.86113	54.0267	28.3647	6.48148	-8.10355	-8.91345	-15.991	43.2205	-21.178	39.9809	-16.2071	37.6035	-0.079625	3.31922	-45.5	18.2	-100.1	52.325	-161.525	61.425	28.8879	33.6336	9.4367	30.0209	-45.0859	59.3184	11.9369	24.2037
105	-4.3225	0.8099	-24.0945	-4.10637	-4.4317	18.4229	9.99408	29.7684	-50.5141	29.4453	-18.3684	38.9525	-73.7987	7.18672	-22.8524	69.2055	-46.1916	38.3042	8.86113	54.2428	28.7969	7.77823	-8.96805	-8.91345	-16.2071	43.4366	-20.9619	40.4131	-16.8555	38.468	-0.120575	2.73	-45.5	18.2	-102.375	52.325	-163.8	61.425	28.2168	33.6017	10.1693	29.5159	-45.7707	60.1396	11.7481	24.9044
106	-4.3225	0.8099	-24.959	-4.97087	-3.99945	19.2874	9.99408	28.4716	-50.5141	29.4453	-16.2071	39.817	-74.6632	7.61897	-23.2846	70.07	-48.3528	41.7622	8.42888	55.1073	29.2292	9.07497	-9.83255	-8.91345	-16.2071	43.8688	-19.6651	41.2753	-18.1522	39.7647	-0.31395	3.05305	-45.5	18.2	-104.65	52.325	-170.625	68.25	29.2247	33.2241	9.77795	29.0677	-44.9495	60.4581	11.0065	23.6054
107	-4.10637	1.02602	-24.7429	-4.75475	-3.99945	20.3681	10.4263	28.4716	-50.7302	29.6614	-15.1265	41.1138	-75.7438	8.05122	-22.8524	71.1506	-49.8657	43.4912	7.99663	55.9718	29.8776	10.3717	-9.61643	-8.91345	-16.2071	44.3011	-18.3684	42.1398	-19.449	41.0615	0.1729	3.53763	-45.5	18.2	-104.65	52.325	-177.45	77.35	28.756	34.3047	9.95995	29.1882	-45.5136	60.1078	11.2863	24.2788
108	-3.67412	1.45827	-23.4461	-3.458	-4.4317	21.6648	11.2908	29.7684	-51.1625	30.0937	-15.1265	42.8428	-77.0406	8.48347	-21.5556	72.4474	-50.7302	43.4912	7.56438	55.9718	30.7421	11.6685	-8.31968	-8.91345	-17.0716	44.3011	-20.0974	42.1398	-19.0167	41.0615	0.0819	3.9039	-47.775	20.475	-106.925	54.6	-184.275	81.9	28.1054	34.2046	9.91445	29.1723	-44.9267	60.8221	10.9746	24.0627
109	-3.24187	1.89052	-22.1494	-2.16125	-4.86395	22.9616	12.1553	31.0629	-51.5947	30.526	-15.1265	44.5718	-78.3373	8.91572	-20.2589	73.7441	-51.5947	43.4912	7.13213	55.9718	31.6066	12.9652	-7.02293	-8.91345	-17.9361	44.3011	-21.8264	42.1398	-18.5845	41.0615	0.088725	3.68095	-47.775	20.475	-109.2	54.6	-188.825	86.45	28.4898	34.2569	10.1738	29.8753	-46.1802	61.0678	10.349	24.3084
110	-4.10637	1.45827	-23.4461	-3.02575	-5.2962	23.3938	12.1553	31.0629	-52.027	30.9582	-14.6942	45.004	-77.9051	8.91572	-19.3944	74.6086	-52.027	45.6501	7.13213	56.188	30.3098	12.533	-7.45518	-8.04895	-18.1522	44.9495	-22.2586	42.5721	-18.3683	41.2776	0.182	4.67967	-50.05	20.475	-109.2	54.6	-193.375	88.725	29.0267	34.5209	9.98952	29.2906	-46.0892	60.5855	11.3955	25.0409
111	-4.97088	1.02602	-24.7429	-3.89025	-5.72845	23.8261	12.1553	31.0629	-52.4592	31.3904	-14.262	45.4363	-77.4728	8.91572	-18.5299	75.4731	-52.4592	47.8114	7.56438	56.6202	29.0131	12.1007	-7.88743	-7.18445	-17.72	46.2462	-21.3941	43.4366	-18.3683	41.7099	0.025025	4.87532	-50.05	20.475	-111.475	56.875	-195.65	93.275	29.0631	34.0636	10.1169	29.5272	-46.1461	61.5615	11.805	25.0546
112	-5.40312	1.02602	-25.8235	-4.10637	-5.72845	24.6906	12.5876	31.4951	-52.6753	31.3904	-14.262	45.8685	-77.689	9.34797	-18.3138	77.2021	-52.8915	49.3243	7.99663	57.0525	29.2292	12.1007	-7.88743	-6.53608	-17.2877	47.5407	-20.5296	44.3011	-18.3683	42.1421	-0.1729	4.91855	-50.05	22.75	-116.025	59.15	-195.65	95.55	28.9425	34.7711	9.95312	30.2848	-47.4747	60.8676	10.5492	25.1888
113	-5.40312	1.45827	-26.688	-3.67413	-5.2962	25.9873	13.4521	32.3596	-52.6753	30.9582	-14.6942	46.3008	-78.5535	10.2125	-18.746	79.7956	-53.3237	50.1888	7.99663	56.6202	30.9582	12.533	-7.45518	-6.10383	-17.72	47.9729	-20.0974	44.3011	-19.2328	43.4389	0.329875	5.3053	-50.05	22.75	-120.575	61.425	-200.2	97.825	29.4271	34.4344	10.6993	30.5464	-49.529	60.3603	11.6935	24.9363
114	-5.40312	1.89052	-27.5525	-3.24188	-4.86395	27.2841	14.3166	33.2241	-52.6753	30.526	-15.1265	46.733	-79.418	11.077	-19.1782	82.3891	-53.756	51.0533	7.99663	56.188	32.6872	12.9652	-7.02293	-5.67158	-18.1522	48.4052	-19.6651	44.3011	-20.0973	44.7333	-0.3913	5.67612	-50.05	27.3	-120.575	63.7	-200.2	97.825	29.0608	33.9475	10.9041	30.3667	-51.3285	60.3603	11.3386	25.6939
115	-4.97088	1.02602	-27.5525	-2.80962	-4.86395	27.2841	13.8843	33.6564	-52.2431	31.8227	-13.8297	47.5975	-80.7147	11.077	-19.1782	84.5504	-55.0527	51.4855	7.99663	56.4041	32.255	13.3975	-7.02293	-5.23933	-18.5845	48.8374	-19.8812	45.1656	-20.7457	45.5978	0.13195	6.40868	-50.05	27.3	-120.575	63.7	-200.2	97.825	29.5249	34.4958	11.1475	30.5874	-52.8346	59.7188	10.7175	26.9769
116	-4.53862	0.161525	-27.5525	-2.37738	-4.86395	27.2841	13.4521	34.0886	-51.8108	33.1194	-12.533	48.462	-82.0115	11.077	-19.1782	86.7116	-56.3472	51.9178	7.99663	57.2686	31.8227	13.8297	-7.02293	-4.80708	-19.0167	49.2697	-20.7457	46.8946	-21.178	46.0301	-0.034125	6.5975	-50.05	27.3	-125.125	63.7	-200.2	100.1	29.6706	34.6164	10.9063	30.5328	-53.8515	59.0613	10.7425	28.2214
117	-4.10637	-0.270725	-27.5525	-1.94512	-5.08008	27.2841	13.6682	34.3047	-51.8108	33.5517	-12.1007	48.8943	-82.6576	11.2931	-19.6105	88.8706	-57.4278	52.35	7.99663	58.1331	32.0388	14.0459	-6.59068	-4.59095	-19.449	49.7019	-21.6102	48.6236	-21.6102	46.4623	-0.3003	7.0343	-56.875	27.3	-125.125	63.7	-200.2	100.1	29.3134	34.464	11.2066	31.2266	-55.4076	59.5095	10.829	28.0849
118	-3.67412	-0.270725	-27.5525	-1.51288	-5.51233	27.2841	14.5327	34.3047	-52.2431	33.1194	-12.533	48.8943	-82.6576	11.7253	-20.475	91.0318	-58.2923	52.7823	8.42888	58.9976	32.9033	14.0459	-5.72618	-4.59095	-19.0167	50.5664	-21.178	49.0558	-21.178	47.3268	-0.2821	6.8523	-56.875	27.3	-127.4	63.7	-200.2	100.1	29.9982	35.4604	11.2635	31.9137	-55.8421	58.4425	10.1442	28.7333
119	-3.24187	-0.270725	-27.5525	-1.08063	-5.94458	27.2841	15.3972	34.3047	-52.6753	32.6872	-12.9652	48.8943	-82.6576	12.1576	-21.3395	93.1931	-59.1568	53.2145	8.86113	59.8598	33.7678	14.0459	-4.86167	-4.59095	-18.5845	51.4309	-20.7457	49.4881	-20.7457	48.1913	-0.24115	7.87605	-59.15	31.85	-127.4	63.7	-204.75	100.1	29.4385	35.2966	11.3113	32.2345	-57.5552	58.0307	11.1771	29.2975
120	-3.67412	-0.270725	-28.417	-2.37738	-5.08008	28.1486	16.2617	34.737	-52.6753	33.1194	-12.533	50.191	-82.6576	12.1576	-21.7718	95.7866	-60.4536	54.9435	8.86113	60.0759	33.3356	14.4781	-4.42943	-4.59095	-18.8006	52.0793	-19.8812	49.4881	-20.7457	48.4075	-0.329875	8.27873	-59.15	31.85	-129.675	63.7	-204.75	100.1	29.8821	35.0759	11.2977	32.2618	-59.1227	57.173	11.2021	28.7583
121	-4.10637	-0.270725	-29.2815	-3.67413	-4.21558	29.0131	17.1262	35.1692	-52.6753	33.5517	-12.1007	51.4878	-82.6576	12.1576	-22.204	98.3801	-61.7503	56.6725	8.42888	59.6437	32.9033	14.9103	-3.99718	-4.59095	-19.6651	52.5115	-18.5845	49.0558	-21.178	47.9752	-0.202475	8.52215	-56.875	31.85	-138.775	65.975	-204.75	102.375	29.2224	34.3934	11.5138	31.577	-60.5173	57.0502	10.8609	28.2282
122	-3.67412	0.37765	-29.2815	-3.458	-3.78332	29.4453	17.5584	35.8176	-52.8892	33.9839	-11.8846	53.0007	-83.5221	12.1576	-22.4201	99.4607	-63.0471	58.4015	7.99663	59.2137	32.9033	15.1265	-3.78105	-4.1587	-20.5296	52.9438	-17.2877	48.6236	-21.6102	47.543	-0.182	9.10682	-56.875	31.85	-141.05	65.975	-204.75	102.375	30.0163	35.0441	11.7117	32.421	-61.1042	57.1116	11.9574	28.4694
123	-2.37737	1.6744	-28.417	-1.729	-3.78332	29.4453	17.5584	36.6821	-53.3215	34.4162	-11.8846	54.7297	-85.2511	12.1576	-22.4201	99.0285	-64.3438	60.1305	8.42888	59.6437	33.3356	15.1265	-3.78105	-3.2942	-20.9619	52.9438	-18.1522	49.9203	-22.4747	48.4075	-0.4732	9.5459	-56.875	31.85	-141.05	68.25	-204.75	102.375	30.1233	34.9463	11.5911	32.7555	-61.905	57.7714	10.2352	28.8652
124	-1.08062	2.97115	-27.5525	0	-3.78332	29.4453	17.5584	37.5466	-53.7537	34.8484	-11.8846	56.4587	-86.9801	12.1576	-22.4201	98.5962	-65.6406	61.8595	8.86113	60.0759	33.7678	15.1265	-3.78105	-2.4297	-21.3941	52.9438	-19.0167	51.2171	-23.3392	49.272	-0.725725	10.5082	-56.875	31.85	-147.875	70.525	-207.025	102.375	30.3439	34.5846	11.9346	32.2003	-62.6216	58.0785	11.143	30.1301
125	-0.648375	2.97115	-28.417	-1.29675	-3.35108	28.5808	19.2874	37.5466	-54.186	34.8484	-11.4523	55.1619	-86.5478	12.1576	-23.2846	98.164	-66.5051	61.4273	9.29338	60.5082	33.7678	16.8555	-3.78105	-3.2942	-21.8263	53.1599	-19.0167	52.0816	-23.9876	49.9203	-0.989625	10.8631	-56.875	34.125	-147.875	70.525	-207.025	102.375	30.1483	35.945	11.764	32.1594	-63.4634	57.851	10.4764	29.691
126	-0.216125	2.97115	-29.2815	-2.5935	-2.91883	27.7163	21.0165	37.5466	-54.6182	34.8484	-11.0201	53.8652	-86.1156	12.1576	-24.1491	97.7317	-67.3696	60.995	9.72563	60.9404	33.7678	18.5845	-3.78105	-4.1587	-22.2586	53.5922	-18.1522	52.5138	-24.4199	50.3526	-1.54473	11.0702	-59.15	34.125	-150.15	70.525	-209.3	102.375	30.0778	35.9063	11.7572	32.1844	-64.9535	57.6144	10.3262	30.2575
127	0.43225	2.75502	-29.9299	-2.80962	-2.7027	28.1486	21.8809	37.7627	-54.8343	34.8484	-10.5878	53.2168	-86.3317	12.1576	-24.5814	99.0285	-68.018	60.995	10.1579	61.3727	33.3356	19.2329	-3.3488	-4.37483	-22.6909	54.0244	-17.2877	52.9461	-24.8521	50.7848	-1.57657	10.9701	-59.15	34.125	-154.7	72.8	-211.575	102.375	29.8844	35.3285	10.8062	30.3462	-66.521	56.0879	11.3045	28.797
128	1.29675	2.32277	-30.3621	-1.94512	-2.7027	29.8776	21.8809	38.195	-54.8343	34.8484	-10.1579	53.2168	-87.1962	12.1576	-24.5814	102.054	-68.4502	61.4273	10.5901	63.1017	32.4711	18.8006	-2.4843	-3.94258	-21.8263	54.4567	-16.8555	53.8106	-24.8521	50.7848	-1.729	11.946	-59.15	34.125	-156.975	72.8	-213.85	102.375	29.9936	36.1088	10.4104	30.6215	-66.3936	56.3654	11.3568	30.121
129	2.16125	1.89052	-30.7944	-1.08063	-2.7027	31.6043	21.8809	38.6272	-54.8343	34.8484	-9.72563	53.2168	-88.0607	12.1576	-24.5814	105.08	-68.8825	61.8595	11.0224	64.8307	31.6066	18.3684	-1.6198	-3.51032	-20.9619	54.8889	-16.4232	54.6751	-24.8521	50.7848	-1.66757	12.3373	-61.425	36.4	-156.975	72.8	-213.85	102.375	30.146	36.2567	10.2966	31.3859	-66.6552	56.0014	11.9688	29.6797
130	1.729	2.32277	-30.7944	-1.08063	-3.13495	32.0365	22.7455	39.4917	-54.8343	35.7107	-11.0201	54.9458	-88.9252	13.0221	-25.0136	105.08	-68.4502	64.0208	10.8063	65.4791	31.1743	18.3684	-2.05205	-3.51032	-21.3941	55.3212	-15.991	55.3234	-25.0682	51.2171	-1.6107	12.649	-61.425	36.4	-156.975	72.8	-213.85	102.375	30.2211	35.54	9.9372	32.173	-67.8883	55.7216	11.6139	30.6078
131	1.29675	2.75502	-30.7944	-1.08063	-3.5672	32.4688	23.6099	40.3562	-54.8343	36.5752	-12.3168	56.6748	-89.7897	13.8866	-25.4459	105.08	-68.018	66.182	9.94175	65.0468	30.7421	18.3684	-2.4843	-3.51032	-23.1231	55.7534	-15.5587	55.7557	-25.5005	52.0816	-1.66985	12.9925	-63.7	38.675	-156.975	72.8	-213.85	102.375	31.1243	36.1816	10.0623	31.5474	-67.6744	55.9104	11.88	30.7216
132	1.29675	2.97115	-31.4428	-1.51288	-3.5672	33.1172	24.0422	41.0046	-55.0505	37.2236	-12.9652	57.9715	-90.0058	14.3188	-25.4459	106.161	-67.5857	67.4765	9.07725	64.6146	31.1743	18.3684	-2.91655	-3.07808	-24.8521	56.1857	-15.1265	56.188	-25.9327	52.9461	-2.1021	13.7342	-63.7	38.675	-156.975	72.8	-216.125	102.375	30.2143	35.7402	9.94857	32.2822	-67.7995	56.8841	11.3204	32.0775
133	1.729	2.97115	-32.7395	-2.37738	-3.13495	33.9817	24.0422	41.4369	-55.4827	37.6558	-12.9652	58.8338	-89.5736	14.3188	-25.0136	108.322	-67.1535	67.9087	9.5095	65.0468	32.4711	18.3684	-3.3488	-2.21357	-24.8521	56.1857	-13.3975	57.9169	-26.365	52.9461	-2.07707	14.4576	-63.7	38.675	-159.25	72.8	-216.125	102.375	30.3121	36.2817	10.1601	32.6895	-68.1203	56.7704	10.8881	31.8204
134	2.16125	2.97115	-34.0363	-3.24188	-2.7027	34.8462	24.0422	41.8691	-55.915	38.0881	-12.9652	59.6983	-89.1413	14.3188	-24.5814	110.483	-66.7212	68.341	9.94175	65.4791	33.7678	18.3684	-3.78105	-1.34908	-24.8521	56.1857	-11.6685	59.646	-26.7972	52.9461	-2.05205	14.3644	-63.7	40.95	-159.25	72.8	-216.125	102.375	30.4691	36.0451	10.1715	32.4278	-68.0498	58.2195	12.0598	32.9829
135	2.5935	3.4034	-33.604	-2.37738	-2.7027	35.2784	25.3389	43.1658	-56.3472	38.0881	-12.1007	59.266	-90.4381	15.1811	-24.5814	111.778	-68.8825	68.341	10.374	66.1274	33.7678	19.6651	-3.78105	-0.916825	-24.8521	56.834	-11.0201	60.9427	-27.0133	53.8106	-2.30685	15.5064	-65.975	43.225	-166.075	72.8	-216.125	102.375	30.5828	36.541	9.76657	33.2355	-68.0407	58.8975	11.8846	34.6528
136	3.02347	3.83565	-33.1718	-1.51288	-2.7027	35.7107	26.6357	44.4626	-56.7794	38.0881	-11.2362	58.8338	-91.7348	16.0456	-24.5814	113.074	-71.0437	68.341	10.8063	66.9919	33.7678	20.9619	-3.78105	-0.484575	-24.8521	58.1308	-11.4524	61.8072	-27.0133	55.5396	-2.34553	16.2685	-65.975	43.225	-166.075	72.8	-216.125	102.375	30.5055	36.3704	9.71425	33.0307	-67.8564	59.6505	13.2746	33.9817
137	3.67185	4.48402	-33.604	-0.8645	-2.48658	36.7913	27.5002	44.8949	-56.7794	38.3042	-10.804	59.266	-92.5993	16.4778	-23.933	114.155	-71.9082	69.4216	11.2385	67.8564	33.7678	21.178	-3.78105	-0.26845	-24.8521	59.4275	-11.8846	62.6717	-27.0133	57.2686	-2.0748	17.6313	-65.975	43.225	-166.075	72.8	-216.125	102.375	30.4622	36.4091	10.622	33.4812	-68.8824	61.9232	13.7842	34.5891
138	4.53635	5.34852	-34.9008	-0.43225	-2.05433	38.5203	27.9325	44.4626	-56.3472	38.7364	-10.804	60.5628	-93.0316	16.4778	-22.6363	115.019	-71.476	71.5829	10.8063	66.9919	33.7678	20.3135	-3.78105	-0.26845	-25.7166	60.2921	-11.8846	63.5362	-27.0133	56.8363	-2.40922	17.8497	-65.975	43.225	-166.075	75.075	-216.125	102.375	31.4359	36.218	10.8154	33.4584	-69.5035	61.218	13.6841	35.9177
139	5.40085	6.21303	-36.1975	0	-1.62207	40.2493	28.3647	44.0304	-55.915	39.1687	-10.804	61.8595	-93.4638	16.4778	-21.3395	115.884	-71.0437	73.7441	10.374	66.1274	33.7678	19.449	-3.78105	-0.26845	-26.5788	61.1566	-11.8846	64.3984	-27.0133	56.4041	-2.79598	18.4275	-68.25	43.225	-168.35	75.075	-216.125	102.375	31.0424	36.6639	11.5342	33.9362	-70.4112	61.6024	13.4771	36.516
140	4.9686	5.78077	-37.062	-1.29675	-1.62207	39.3848	28.7969	45.3271	-56.3472	40.0332	-9.5095	62.724	-93.4638	16.4778	-21.3395	118.045	-68.8825	75.0409	10.5901	66.3435	33.3356	20.7457	-3.3488	0.1638	-27.0111	61.5888	-11.6685	65.0468	-27.6594	56.4041	-3.0667	18.6618	-68.25	43.225	-168.35	75.075	-220.675	102.375	30.7717	35.92	10.8199	33.8747	-73.462	63.4497	14.1596	36.9119
141	4.53635	5.34852	-37.9242	-2.5935	-1.62207	38.5203	29.2292	46.6239	-56.7794	40.8977	-8.21275	63.5885	-93.4638	16.4778	-21.3395	120.206	-66.7212	76.3376	11.4546	67.6403	32.9033	22.0425	-2.91655	0.59605	-27.0111	61.5888	-11.2362	65.4791	-28.9562	56.8363	-2.85285	19.4558	-65.975	43.225	-168.35	75.075	-220.675	102.375	30.9491	36.7367	11.5934	33.4721	-74.1218	63.3133	14.4394	36.6912
142	4.53635	4.70015	-38.3565	-3.02575	-1.18983	38.3042	29.8776	46.84	-56.7794	41.1138	-7.56437	65.1014	-94.1122	17.1262	-21.1234	120.855	-66.5051	76.5538	12.3191	68.9371	32.6872	23.1231	-2.4843	1.0283	-27.0111	61.5888	-10.804	65.9113	-30.253	57.2686	-2.84148	19.6264	-65.975	43.225	-170.625	75.075	-220.675	102.375	30.6352	36.5661	12.3282	32.6007	-74.918	63.5294	14.8694	36.4227
143	4.9686	3.83565	-38.3565	-2.5935	-0.325325	38.7364	30.7398	45.9755	-56.3472	40.6816	-7.56437	67.2626	-95.4089	18.4229	-20.6911	119.99	-68.2341	75.6893	12.3191	70.2338	32.6872	23.9876	-2.05205	1.46055	-26.1489	61.5888	-8.64273	65.9113	-29.8207	58.1331	-3.08263	19.9563	-65.975	43.225	-170.625	77.35	-220.675	102.375	31.4132	36.5433	12.285	31.9706	-75.4299	64.2733	15.1788	37.9265
144	5.40085	2.97115	-38.3565	-2.16125	0.539175	39.1687	31.6043	45.111	-55.915	40.2493	-7.56437	69.4239	-96.7057	19.7197	-20.2589	119.126	-69.9631	74.8248	12.3191	71.5306	32.6872	24.8498	-1.6198	1.8928	-25.2844	61.5888	-6.48148	65.9113	-29.3885	58.9976	-2.9848	20.3931	-65.975	43.225	-175.175	79.625	-220.675	102.375	30.4827	36.6457	13.129	31.4109	-76.7403	65.3062	14.2915	37.5489
145	5.40085	3.83565	-37.4943	-1.29675	0.106925	41.3299	31.6043	45.111	-55.915	39.817	-7.56437	72.0174	-96.7057	19.2874	-19.3944	119.99	-69.0986	76.1215	12.3191	72.1789	31.3905	25.7143	-0.32305	2.32505	-25.0682	61.8049	-5.40085	66.1274	-28.9562	59.4298	-3.21457	21.2849	-65.975	43.225	-175.175	79.625	-220.675	102.375	30.9559	36.7481	13.6409	30.328	-76.9155	65.0423	14.246	38.1677
146	5.40085	4.70015	-36.6298	-0.43225	-0.325325	43.4912	31.6043	45.111	-55.915	39.3848	-7.56437	74.6109	-96.7057	18.8552	-18.5299	120.855	-68.2341	77.4183	12.3191	72.1789	30.0937	26.5788	0.971425	2.7573	-25.5005	62.2372	-5.40085	66.5597	-28.524	59.4298	-3.21685	21.4624	-65.975	43.225	-179.725	79.625	-220.675	102.375	31.1357	36.6116	13.9662	30.1005	-77.9597	64.8807	15.9637	37.4579
147	5.8331	5.9969	-36.1975	0.216125	-0.325325	44.3557	32.0365	45.5432	-56.1311	39.6009	-7.34825	76.1238	-96.9218	18.8552	-18.3138	121.071	-68.018	78.0666	12.3191	72.1789	29.2292	27.0111	1.40367	3.6218	-25.9327	62.6694	-5.40085	66.9919	-28.0917	59.4298	-3.3488	22.5293	-65.975	43.225	-179.725	79.625	-220.675	102.375	31.0833	36.1589	13.9139	29.7001	-78.6763	65.2538	15.8613	38.4202
148	6.6976	7.7259	-36.1975	0.648375	0.106925	43.9234	32.901	46.4077	-56.5633	40.4654	-6.916	76.556	-97.3541	19.2874	-18.746	120.639	-68.4502	78.0666	11.8869	71.7467	28.7969	27.0111	0.971425	4.91628	-26.795	63.9662	-4.53635	67.4242	-29.3885	59.8621	-3.82882	23.2414	-65.975	43.225	-179.725	79.625	-220.675	102.375	31.0492	37.4692	13.7819	29.6069	-79.2997	66.6643	16.2526	39.2574
149	7.5621	9.4549	-36.1975	1.08062	0.539175	43.4912	33.7655	47.2722	-56.9956	41.3299	-6.48375	76.9883	-97.7863	19.7197	-19.1782	120.206	-68.8825	78.0666	11.4546	71.3144	28.3647	27.0111	0.54145	6.21303	-27.6595	65.2629	-3.67413	67.8564	-30.6852	60.2943	-3.44662	23.0708	-65.975	45.5	-179.725	84.175	-220.675	102.375	31.6316	37.1962	13.7137	29.1064	-80.4304	67.6949	15.5041	40.2061
150	8.4266	10.3194	-36.1975	0.216125	0.106925	44.3557	35.0623	46.84	-56.9956	41.3299	-5.187	77.8528	-97.7863	19.7197	-20.0427	121.935	-71.476	78.0666	11.4546	71.3144	28.3647	27.8756	0.1092	6.64527	-28.3078	65.6952	-4.1041	68.7209	-31.3336	60.7266	-3.90162	23.9034	-65.975	45.5	-182	84.175	-220.675	102.375	31.4018	36.6866	13.4293	29.4726	-81.213	68.2068	17.1945	40.0195
151	9.2911	11.1839	-36.1975	-0.648375	-0.325325	45.2202	36.359	46.4077	-56.9956	41.3299	-3.89025	78.7173	-97.7863	19.7197	-20.9072	123.664	-74.0695	78.0666	11.8869	71.7467	28.3647	28.7401	-0.32305	7.07752	-28.7401	65.2629	-5.8331	70.0177	-31.3336	61.1588	-4.3589	24.3379	-65.975	45.5	-184.275	88.725	-220.675	102.375	31.3222	37.5967	13.5499	28.7787	-82.5006	69.5331	17.886	42.0329
152	9.93948	12.0484	-36.4136	-0.43225	-0.54145	44.7879	36.7913	46.6239	-56.9956	41.546	-4.10638	79.5818	-98.4347	20.5842	-20.0427	124.313	-74.2856	78.9311	12.3191	72.1789	28.5808	29.6046	-0.106925	7.7259	-29.1723	64.8307	-7.5621	71.3144	-31.3336	61.5911	-4.32705	24.909	-65.975	47.775	-188.825	88.725	-220.675	102.375	31.8182	36.8209	13.0949	28.4102	-82.8009	70.6251	17.3014	42.3423
153	10.3717	12.9129	-36.8459	0.8645	-0.54145	43.0589	36.359	47.4884	-56.9956	41.9783	-5.83537	80.4463	-99.7314	22.3132	-17.4492	123.881	-72.1243	80.6601	12.3191	73.0434	29.0131	30.4691	0.7553	8.5904	-28.7401	65.2629	-6.26535	70.8822	-30.9013	62.0233	-4.89353	25.1547	-70.525	50.05	-193.375	91	-220.675	102.375	31.3495	36.8231	13.5658	27.6913	-84.241	71.0096	17.3628	42.8109
154	10.804	13.7774	-37.2781	2.16125	-0.54145	41.3299	35.9268	48.3529	-56.9956	42.4106	-7.56437	81.3085	-101.028	24.0422	-14.8557	123.448	-69.9631	82.3891	12.3191	73.9079	29.4453	31.3336	1.6198	9.4549	-28.3078	65.6952	-4.9686	70.4499	-30.4691	62.4556	-4.90717	25.4299	-70.525	50.05	-193.375	91	-220.675	102.375	31.0333	36.698	12.7741	27.2954	-84.5208	71.1188	17.0443	42.1808
155	12.1007	14.6419	-36.8459	1.729	-0.1092	42.6267	36.7913	47.4884	-56.5633	42.4106	-6.26763	82.6052	-101.46	23.6099	-14.8557	123.448	-69.9631	83.6859	12.7514	74.1241	29.4453	32.6303	1.18755	9.4549	-28.3078	66.5597	-3.24188	70.0177	-30.253	62.8878	-5.07553	26.1489	-70.525	50.05	-197.925	93.275	-220.675	102.375	31.1925	36.9528	12.4169	27.4183	-85.5446	70.9459	16.9465	42.8564
156	13.3975	15.5064	-36.4136	1.29675	0.32305	43.9234	37.6558	46.6239	-56.1311	42.4106	-4.97088	83.902	-101.893	23.1777	-14.8557	123.448	-69.9631	84.9826	13.6159	73.6918	29.4453	33.9271	0.7553	9.4549	-28.7401	67.8564	-1.08062	69.5854	-30.253	63.3201	-5.23705	26.2558	-72.8	50.05	-197.925	95.55	-220.675	102.375	31.6907	37.0711	12.8811	26.3422	-86.5296	71.5943	16.5415	42.4515
157	13.8297	16.3709	-36.4136	1.51287	0.32305	43.9234	38.5203	47.0561	-56.3472	42.6267	-4.75475	84.5504	-102.109	22.9616	-15.288	123.664	-69.9631	86.0633	14.4804	73.2596	29.4453	35.4399	0.325325	9.88715	-29.1723	69.1532	1.08063	69.1532	-30.253	63.7523	-5.8604	26.4423	-72.8	50.05	-195.65	95.55	-220.675	102.375	31.5907	36.9528	13.2905	26.0761	-87.1257	71.0528	17.8406	43.3911
158	13.3975	17.2354	-36.8459	2.37738	-0.1092	42.6267	39.3848	48.7851	-57.2117	43.0589	-5.61925	84.5504	-102.109	22.9616	-16.1525	124.097	-69.9631	86.9278	14.0481	74.9886	29.4453	37.169	-0.106925	10.7517	-30.0368	68.7209	3.24187	70.0177	-30.253	64.1846	-5.3053	26.7949	-72.8	50.05	-193.375	95.55	-220.675	102.375	31.6657	37.3578	12.5944	25.7325	-86.5273	71.6989	16.4824	43.5913
159	12.9652	18.0999	-37.2781	3.24188	-0.54145	41.3299	40.2493	50.5141	-58.0762	43.4912	-6.48375	84.5504	-102.109	22.9616	-17.017	124.529	-69.9631	87.7923	13.6159	76.7176	29.4453	38.8979	-0.539175	11.6161	-30.9013	68.2887	5.40312	70.8822	-30.253	64.6168	-5.85357	26.8109	-72.8	50.05	-193.375	95.55	-220.675	102.375	31.2812	37.906	12.9379	25.2707	-86.5183	70.07	18.3001	43.5571
160	12.533	18.5321	-38.1404	3.24188	0.7553	43.9234	41.1138	50.0819	-57.2117	43.0589	-6.48375	84.9826	-103.406	23.3938	-16.5847	126.69	-69.9631	89.089	13.3998	77.3659	29.0131	39.7624	0.7553	11.1839	-31.5497	68.5048	6.916	71.7467	-31.3336	64.6168	-6.01737	27.1771	-72.8	50.05	-193.375	95.55	-220.675	102.375	32.1412	38.0357	12.7991	25.5164	-86.0314	70.707	17.2263	44.4103
161	12.1007	18.9644	-39.0049	3.24188	2.05205	46.5169	41.9783	49.6496	-56.3472	42.6267	-6.48375	85.4149	-104.702	23.8261	-16.1525	128.851	-69.9631	90.3835	13.3998	76.9337	28.5808	40.6269	2.05205	10.7517	-31.9819	69.3693	7.7805	72.6112	-33.4948	64.1846	-6.72262	27.5684	-72.8	52.325	-193.375	95.55	-220.675	102.375	32.0729	37.1871	12.5125	25.2525	-85.3535	71.3053	18.0089	43.5344
162	12.3168	19.8289	-39.6533	3.24188	2.70042	48.2459	43.0589	49.6496	-56.3472	43.2751	-6.26763	86.0632	-105.567	24.0422	-15.5041	129.5	-69.3147	91.0318	13.3998	76.5014	28.5808	41.4914	2.4843	10.9678	-32.4142	70.2338	8.645	73.4757	-35.6561	63.7523	-6.58385	27.3409	-75.075	56.875	-193.375	95.55	-220.675	102.375	31.4814	37.1894	11.9597	24.5859	-85.1555	70.7525	18.1659	43.25
163	13.1813	21.1256	-40.0855	3.24188	2.70042	49.1104	44.3557	50.0819	-57.2117	45.0041	-5.83537	86.9277	-105.997	24.0422	-14.6396	128.635	-68.018	91.0318	13.3998	75.6369	29.0131	42.356	2.05205	11.8323	-33.2787	70.2338	8.21275	73.4757	-34.7916	63.7523	-6.48375	28.3465	-75.075	56.875	-195.65	100.1	-220.675	102.375	32.3437	38.2996	12.2918	24.8407	-84.2774	70.8503	18.2705	44.2897
164	14.0458	22.4224	-40.5177	3.24188	2.70042	49.9749	45.6524	50.5141	-58.0762	46.733	-5.40312	87.7922	-106.429	24.0422	-13.7751	127.771	-66.7212	91.0318	13.3998	74.7724	29.4453	43.2204	1.6198	12.6968	-34.1432	70.2338	7.7805	73.4757	-33.9271	63.7523	-6.66575	28.7333	-75.075	56.875	-195.65	100.1	-220.675	102.375	31.3632	37.8651	12.0029	23.8056	-83.7041	70.8526	18.6186	44.731
165	14.4781	22.4224	-40.95	3.67413	1.83593	49.5427	45.6524	51.3786	-58.0762	47.1653	-6.26763	89.089	-106.861	23.6099	-14.2074	126.906	-66.7212	94.0576	13.832	75.2047	29.4453	43.2204	0.7553	13.5613	-34.5755	70.2338	7.99662	73.4757	-33.711	63.9685	-6.47238	28.6195	-75.075	56.875	-195.65	100.1	-220.675	102.375	31.0947	37.1576	11.7003	25.066	-84.1431	70.4818	17.886	45.7389
166	14.9103	22.4224	-41.3822	4.10638	0.971425	49.1104	45.6524	52.2431	-58.0762	47.5976	-7.13212	90.3858	-107.294	23.1777	-14.6396	126.042	-66.7212	97.0833	14.6965	76.9337	29.4453	43.2204	-0.106925	14.4258	-34.5755	70.2338	8.86113	73.4757	-34.1432	64.4007	-6.1698	28.7719	-75.075	56.875	-195.65	100.1	-220.675	102.375	31.9774	38.336	11.4091	24.6633	-83.8224	70.8116	18.8757	45.6934
167	15.3426	22.6385	-42.0306	4.53863	1.18755	49.7588	46.0847	52.2431	-58.0762	47.3814	-7.56437	91.4664	-107.942	22.9616	-14.8557	124.961	-66.5051	98.3801	15.561	78.6627	29.2292	43.4366	-0.32305	14.858	-34.5755	70.2338	9.72563	73.4757	-34.5755	64.833	-6.25853	28.8515	-75.075	56.875	-195.65	100.1	-220.675	102.375	32.6235	36.7845	11.4523	23.999	-83.2309	70.9345	18.0749	46.1529
168	15.7748	23.0685	-42.8951	4.97087	2.4843	51.4878	46.9492	51.3786	-58.0762	46.5169	-7.56437	92.3309	-108.806	22.9616	-14.8557	123.664	-66.0728	97.9478	15.561	79.0949	28.7969	43.8688	0.1092	14.858	-34.1432	70.2338	9.72563	73.4757	-34.1432	65.2652	-6.85912	29.0381	-75.075	59.15	-195.65	102.375	-227.5	93.275	31.627	37.3578	11.4182	23.1163	-83.6699	70.5546	18.1727	46.8536
169	16.2071	23.5007	-43.7596	5.40313	3.78105	53.2168	47.8137	50.5141	-58.0762	45.6524	-7.56437	93.1954	-109.671	22.9616	-14.8557	122.368	-65.6406	97.5156	15.561	79.5272	28.3647	44.3011	0.54145	14.858	-33.711	70.2338	9.72563	73.4757	-33.711	65.6975	-6.58612	28.6536	-75.075	59.15	-197.925	104.65	-227.5	93.275	31.3882	36.2635	11.4865	23.3802	-83.381	70.3498	18.4616	47.7409
170	15.3426	23.933	-42.8951	5.40313	2.91655	51.92	47.3814	50.9464	-58.0762	46.0847	-6.26763	92.3309	-109.671	23.3938	-14.8557	122.8	-65.6406	97.9478	15.3449	80.1756	29.2292	45.5978	0.54145	15.7225	-33.711	70.2338	10.374	74.1241	-33.9271	66.3458	-6.63617	29.1882	-75.075	59.15	-197.925	104.65	-227.5	93.275	31.8227	36.9414	11.8982	23.1595	-82.5256	70.6251	18.8302	47.6249
171	14.4781	24.3652	-42.0306	5.40313	2.05205	50.6233	46.9492	51.3786	-58.0762	46.5169	-4.97088	91.4664	-109.671	23.8261	-14.8557	123.232	-65.6406	98.3801	14.9126	81.0401	30.0937	46.8946	0.54145	16.587	-34.1432	70.2338	11.6707	75.4208	-34.7916	67.2081	-6.48147	29.3293	-75.075	59.15	-197.925	106.925	-227.5	93.275	32.2094	37.0438	11.3341	22.8456	-82.5848	71.4031	18.5503	48.6054
172	14.9103	25.2297	-41.8145	5.61925	1.6198	50.6233	46.9492	52.027	-58.5085	47.5976	-4.53863	91.0341	-109.671	24.2583	-15.0719	123.664	-65.8567	99.4607	14.4804	81.9046	30.526	47.3268	0.325325	17.0193	-34.5755	70.2338	12.9675	76.7176	-35.6561	68.0726	-6.5156	29.1496	-77.35	59.15	-197.925	106.925	-227.5	93.275	31.4632	37.5853	11.5456	22.3428	-82.1047	71.5033	18.2023	49.6951
173	16.6393	26.5265	-42.2467	6.0515	1.6198	51.92	47.3814	52.8915	-59.373	49.3266	-4.97088	91.0341	-109.671	24.6906	-15.5041	124.097	-66.2889	101.19	15.7771	82.7691	30.526	46.8946	-0.106925	17.0193	-34.5755	70.6638	13.3997	76.2853	-35.6561	68.0726	-6.92737	29.3338	-77.35	59.15	-197.925	106.925	-227.5	93.275	32.4279	37.7218	11.1862	22.336	-82.1275	71.1302	19.408	49.8612
174	18.3683	27.8232	-42.679	6.48375	1.6198	53.2168	47.8137	53.7537	-60.2374	51.0556	-5.40312	91.0341	-109.671	25.1228	-15.9364	124.529	-66.7212	102.919	17.0716	83.6313	30.526	46.4623	-0.539175	17.0193	-34.5755	71.096	13.832	75.853	-35.6561	68.0726	-7.13668	28.963	-77.35	59.15	-197.925	113.75	-227.5	93.275	33.0489	37.7263	11.4364	22.113	-81.7976	71.5374	18.3729	49.6405
175	18.3683	27.8232	-42.679	4.75475	2.91655	52.7845	49.1104	53.3215	-61.1019	50.6233	-5.40312	93.1954	-109.239	24.6906	-15.0719	124.529	-67.1535	102.919	18.1522	84.0635	30.0937	47.3268	-0.971425	17.0193	-34.7916	71.3121	14.2643	75.2047	-35.6561	68.0726	-7.42787	29.9504	-77.35	59.15	-197.925	113.75	-227.5	93.275	32.9466	38.4634	11.1793	21.9788	-81.0969	70.7957	18.1613	49.7156
176	18.3683	27.8232	-42.679	3.02575	4.2133	52.3523	50.4072	52.8915	-61.9665	50.1911	-5.40312	95.3566	-108.806	24.2583	-14.2074	124.529	-67.5857	102.919	19.0167	84.0635	29.6615	48.1891	-1.40368	17.0193	-35.2238	71.3121	14.6965	74.3402	-35.6561	68.0726	-7.8806	28.822	-77.35	59.15	-197.925	113.75	-227.5	93.275	32.0047	37.6422	11.6457	21.567	-81.1788	70.475	18.7756	49.2674
177	19.2328	28.0394	-42.8951	2.37738	4.64555	52.1362	51.2717	52.4592	-62.1826	49.9749	-5.187	95.5727	-109.023	24.2583	-14.4235	124.745	-67.3696	103.135	19.8812	84.0635	29.8776	48.8374	-1.40368	17.4515	-35.6561	71.3121	15.1288	73.4757	-35.6561	68.0726	-8.2355	29.6887	-77.35	59.15	-197.925	113.75	-227.5	93.275	32.6212	37.4283	11.8027	21.8332	-80.9149	70.8003	19.3375	49.6291
178	20.9618	28.4716	-43.3274	2.80963	4.2133	52.1362	51.7039	52.027	-61.7503	49.9749	-4.75475	93.8438	-109.887	24.6906	-15.7203	125.177	-66.5051	103.567	19.0167	84.4958	30.7421	49.2697	-0.971425	18.316	-35.6561	72.1766	14.6965	74.3402	-36.0883	68.5048	-8.04895	29.7615	-77.35	59.15	-197.925	113.75	-227.5	93.275	32.6007	37.3237	11.6958	21.3805	-81.172	69.8197	18.8506	48.4962
179	22.6908	28.9039	-43.7596	3.24188	3.78105	52.1362	52.1362	51.5947	-61.3181	49.9749	-4.3225	92.1147	-110.752	25.1228	-17.017	125.61	-65.6406	103.999	18.1522	84.928	31.6066	49.7019	-0.539175	19.1805	-35.6561	73.0412	14.2643	75.2047	-36.5206	68.9371	-8.23777	29.7001	-77.35	59.15	-197.925	116.025	-227.5	93.275	32.5416	37.8014	11.7595	21.41	-80.419	71.5874	19.1805	50.4185
180	20.9618	28.4716	-45.0564	4.97087	4.2133	51.7039	52.1362	52.4592	-62.1826	51.7039	-4.3225	92.547	-110.319	23.8261	-15.7203	126.474	-64.7761	103.567	17.5038	84.7119	30.3098	49.2697	-1.40368	20.045	-35.6561	73.6895	14.2643	75.4208	-36.5206	69.3693	-8.3447	30.3826	-77.35	59.15	-200.2	116.025	-227.5	93.275	32.4392	38.2018	11.7777	21.112	-80.2028	71.4737	18.6414	49.9385
181	19.2328	28.0394	-46.3531	6.69988	4.64555	51.2717	52.1362	53.3215	-63.0471	53.4329	-4.3225	92.9792	-109.887	22.5293	-14.4235	127.339	-63.9116	103.135	17.0716	83.8474	29.0131	48.8374	-2.26818	20.9095	-35.6561	74.1218	14.6965	74.9886	-36.0883	69.8016	-8.78605	29.7138	-77.35	59.15	-200.2	116.025	-227.5	93.275	33.058	37.7422	11.7595	20.7435	-80.6123	71.187	19.1578	49.2765
182	19.2328	28.0394	-47.0015	7.34825	4.64555	51.0555	52.3523	53.5376	-63.0471	53.6491	-4.97088	94.0599	-109.671	22.5293	-13.7751	127.339	-63.2632	102.919	16.6394	82.9829	28.1486	49.7019	-2.26818	21.774	-35.6561	74.554	15.1288	74.5563	-35.6561	70.2338	-8.97715	29.5955	-77.35	59.15	-200.2	116.025	-227.5	93.275	32.7668	37.1121	12.1189	21.2144	-80.7466	71.385	18.8893	49.7975
183	20.9618	28.4716	-47.0015	6.916	4.2133	51.0555	52.7845	53.1076	-62.1826	52.3523	-6.26763	95.7889	-109.671	23.8261	-13.7751	126.474	-62.8309	102.919	16.6394	83.4152	27.7163	51.8632	-1.40368	22.6385	-36.0883	74.1218	15.9932	74.1241	-36.0883	69.8016	-9.01128	29.6979	-77.35	59.15	-200.2	116.025	-229.775	93.275	32.2822	37.401	12.1485	21.1211	-80.965	70.7343	18.9144	50.571
184	22.6908	28.9039	-47.0015	6.48375	3.78105	51.0555	53.2168	52.6753	-61.3181	51.0556	-7.56437	97.5179	-109.671	25.1228	-13.7751	125.61	-62.3987	102.919	16.6394	83.8474	27.2841	54.0244	-0.539175	23.503	-36.5206	73.6895	16.8578	73.6918	-36.5206	69.3693	-9.13185	29.5136	-77.35	59.15	-200.2	116.025	-232.05	93.275	31.8909	37.0347	11.8141	20.7412	-81.0446	71.1597	18.9416	49.4813
185	22.6908	29.3361	-47.4337	8.21275	2.91655	52.7845	53.2168	52.2431	-61.3181	51.0556	-6.69987	96.6534	-109.671	23.8261	-14.2074	124.745	-62.3987	104.648	17.0716	85.1441	27.2841	54.0244	-0.539175	22.6385	-36.9528	73.4734	17.0739	73.4757	-36.9528	68.9371	-9.20237	29.3907	-77.35	59.15	-202.475	116.025	-232.05	93.275	33.3902	37.8833	12.31	20.5068	-80.5259	72.0925	17.7086	49.8862
186	22.6908	29.7684	-47.866	9.93947	2.05205	54.5135	53.2168	51.8108	-61.3181	51.0556	-5.83537	95.7889	-109.671	22.5293	-14.6396	123.881	-62.3987	106.377	17.9361	87.3054	27.2841	54.0244	-0.539175	21.774	-37.3851	73.4734	16.6416	73.4757	-37.3851	68.5048	-9.35707	29.302	-77.35	59.15	-202.475	116.025	-232.05	93.275	32.8419	36.3477	12.4351	20.2452	-80.1119	72.1266	17.72	50.7735
187	22.6908	29.7684	-48.7305	10.1556	1.6198	54.7297	53.0007	52.027	-61.5342	51.2717	-5.61925	95.7889	-110.103	21.8809	-14.4235	123.664	-62.1826	107.025	18.8006	89.4667	27.5002	54.0244	-0.539175	21.3418	-37.8173	73.4734	16.2094	73.4757	-37.8173	68.0726	-9.28428	28.938	-77.35	59.15	-202.475	116.025	-232.05	93.275	32.6372	37.2167	12.351	19.3989	-80.7761	71.7603	18.3843	49.4062
188	22.6908	29.3361	-50.0273	8.86113	1.6198	53.4329	52.5684	52.8915	-61.9665	51.7039	-6.0515	96.6534	-110.968	21.8809	-13.559	124.097	-61.7503	106.593	18.8006	89.4667	27.9325	54.0244	-0.539175	21.3418	-37.3851	74.3379	17.5061	74.7724	-37.8173	69.3693	-9.38893	28.7719	-77.35	63.7	-202.475	116.025	-232.05	93.275	32.9511	36.7481	12.2782	20.0473	-80.6715	72.502	17.4629	50.828
189	22.6908	28.9039	-51.324	7.56438	1.6198	52.1362	52.1362	53.7537	-62.3987	52.1362	-6.48375	97.5179	-111.832	21.8809	-12.6945	124.529	-61.3181	106.161	18.8006	89.4667	28.3647	54.0244	-0.539175	21.3418	-36.9528	75.2024	18.8029	76.0692	-37.8173	70.6661	-9.48675	28.5171	-77.35	63.7	-204.75	113.75	-232.05	93.275	32.7873	37.194	12.3351	20.0223	-80.4941	72.4678	17.8951	50.3571
190	24.4198	30.2006	-50.8918	7.99662	2.4843	52.1362	53.0007	54.1859	-62.3987	52.1362	-7.34825	97.9501	-112.264	22.3132	-13.559	124.529	-61.3181	107.025	19.0167	89.2505	27.5002	54.4567	-1.40368	20.9095	-37.169	75.8508	19.2351	76.9337	-37.8173	71.3144	-9.84393	28.2123	-77.35	63.7	-204.75	113.75	-232.05	93.275	33.5813	36.6639	12.5034	19.8949	-80.9195	71.6966	18.614	50.1182
191	26.1466	31.4974	-50.4595	8.42887	3.3488	52.1362	53.8629	54.6182	-62.3987	52.1362	-8.21275	98.3824	-112.697	22.7454	-14.4235	124.529	-61.3181	107.89	19.449	88.8183	26.6357	54.8889	-2.26818	20.4773	-38.0335	76.283	18.8029	77.3659	-37.8173	71.3144	-10.4309	27.7527	-77.35	63.7	-204.75	113.75	-232.05	93.275	33.6518	37.1644	12.3282	19.5445	-80.5941	72.916	17.5789	51.4173
192	26.5788	32.1458	-49.8111	8.21275	3.13267	53.0007	54.5113	55.0504	-62.6148	52.7845	-8.645	98.3824	-112.697	23.1777	-15.0719	124.745	-61.3181	108.322	19.8812	88.386	26.4196	55.5373	-2.4843	20.6934	-38.898	76.7153	18.3706	77.7982	-37.8173	71.3144	-10.8745	27.2409	-77.35	63.7	-204.75	113.75	-232.05	93.275	33.2514	37.3373	12.1804	19.3898	-80.8808	72.6749	18.589	50.9486
193	25.7166	32.1458	-48.9466	7.34825	1.83593	54.7297	54.9435	55.4827	-63.0471	54.0813	-8.645	97.9501	-112.264	23.6099	-15.5041	125.177	-61.3181	108.322	21.6102	90.5473	26.8518	56.4018	-2.05205	21.5579	-38.898	76.7153	18.3706	76.9337	-37.8173	71.3144	-11.1703	27.2545	-77.35	63.7	-204.75	113.75	-232.05	93.275	33.3128	36.8959	12.3214	19.2056	-81.2289	72.6999	18.3388	51.9587
194	24.8521	32.1458	-48.0821	6.48375	0.539175	56.4564	55.3758	55.9149	-63.4793	55.3781	-8.645	97.5179	-111.832	24.0422	-15.9364	125.61	-61.3181	108.322	23.3392	92.7085	27.2841	57.2663	-1.6198	22.4224	-38.898	76.7153	18.3706	76.0692	-37.8173	71.3144	-11.1884	27.4251	-77.35	63.7	-202.475	113.75	-232.05	93.275	33.1558	37.2964	12.1144	19.7561	-81.2493	71.8377	19.1919	51.1124
195	24.4198	32.1458	-49.3789	8.645	0.539175	56.4564	56.6725	55.9149	-63.0471	54.0813	-8.21275	98.8146	-111.832	23.6099	-16.8009	125.61	-60.4536	109.186	24.4199	93.7892	27.2841	56.834	-1.18755	23.2869	-38.898	76.9314	18.5867	75.4208	-38.0335	71.5306	-11.0906	26.638	-77.35	63.7	-202.475	113.75	-232.05	93.275	33.943	36.9801	12.2577	19.3352	-81.2084	71.6989	19.3284	51.729
196	23.9876	32.1458	-50.6756	10.804	0.539175	56.4564	57.9693	55.9149	-62.6148	52.7845	-7.7805	100.111	-111.832	23.1777	-17.6654	125.61	-59.5891	110.051	24.8521	93.7892	27.2841	56.4018	-0.7553	24.1514	-38.898	77.3637	19.019	74.9886	-38.4657	71.9628	-11.1703	26.7449	-77.35	63.7	-202.475	113.75	-232.05	93.275	32.5666	36.7913	12.1189	19.2078	-81.2653	71.7672	19.0145	52.9233
197	24.4198	33.0103	-51.324	11.2362	0.539175	56.0241	58.6176	55.9149	-62.8309	51.9201	-7.34825	101.192	-111.832	22.9616	-17.6654	125.61	-58.9407	110.915	25.2844	93.7892	27.0679	56.1857	-1.18755	24.5836	-38.898	77.7959	19.449	74.5563	-38.898	72.3951	-11.0292	26.3263	-77.35	63.7	-200.2	113.75	-232.05	93.275	32.6576	37.4601	12.0575	19.5718	-81.1674	71.5647	19.8312	52.0747
198	25.7166	34.7392	-51.324	9.93947	0.539175	55.1596	58.6176	55.9149	-63.6955	51.4878	-6.916	102.056	-111.832	22.9616	-16.8009	125.61	-58.5085	111.78	24.4199	92.4924	26.6357	56.1857	-2.4843	24.5836	-38.4657	77.3637	20.3135	74.1241	-38.4657	72.3951	-11.3158	26.4105	-77.35	63.7	-200.2	116.025	-232.05	93.275	31.9615	38.0562	11.9551	19.772	-81.354	71.4168	19.135	52.8733
199	27.0111	36.4682	-51.324	8.645	0.539175	54.2974	58.6176	55.9149	-64.56	51.0556	-6.48375	102.921	-111.832	22.9616	-15.9364	125.61	-58.0762	112.644	23.5554	91.1957	26.2034	56.1857	-3.78105	24.5836	-38.0335	76.9314	21.178	73.6918	-38.0335	72.3951	-11.987	25.7757	-77.35	63.7	-202.475	116.025	-232.05	93.275	32.6667	37.8537	11.8368	19.1396	-81.5997	71.8604	19.0372	52.9119
200	27.8756	36.4682	-51.7562	9.07497	-0.325325	56.0241	58.1854	56.3472	-64.1277	51.0556	-6.916	102.056	-111.832	22.9616	-16.8009	124.745	-58.5085	111.348	23.3392	92.0602	25.7712	56.6179	-2.4843	24.1514	-37.8173	76.7153	21.8264	73.2596	-38.4657	72.8273	-11.9892	25.8713	-79.625	63.7	-202.475	116.025	-232.05	93.275	33.4425	37.9834	11.9346	19.2533	-81.9773	71.8104	20.2043	53.4625
201	28.7401	36.4682	-52.1885	9.50722	-1.18983	57.7532	57.7532	56.7794	-63.6955	51.0556	-7.34825	101.192	-111.832	22.9616	-17.6654	123.881	-58.9407	110.051	23.7715	95.0859	25.3389	57.0502	-1.18755	23.7192	-37.8173	76.7153	22.2586	72.8273	-39.7625	73.6918	-12.3828	25.4345	-79.625	63.7	-204.75	116.025	-232.05	93.275	33.6745	37.8401	11.7686	19.2533	-81.7544	72.3291	20.0291	53.1781
202	29.3884	36.2521	-52.4046	10.5878	-1.18983	58.6176	57.9693	56.5633	-63.6955	51.2717	-7.56437	100.976	-112.048	23.1777	-17.6654	123.448	-59.1568	109.835	24.2037	98.1117	25.1228	57.2663	-0.539175	24.1514	-37.8173	76.7153	22.6909	72.3951	-41.0592	74.5563	-12.3737	25.3503	-77.35	63.7	-204.75	116.025	-232.05	93.275	34.059	37.2304	11.4137	18.6846	-81.8727	72.3882	20.5705	52.7618
203	29.8207	35.8199	-52.4046	12.3168	-0.325325	58.6176	58.8338	55.6988	-64.1277	51.7039	-7.56437	101.408	-112.481	23.6099	-16.8009	123.448	-59.1568	110.699	23.3392	96.3827	25.1228	57.2663	-0.539175	25.4481	-38.6818	78.4443	23.1231	72.8273	-40.1947	74.1241	-12.492	25.3094	-77.35	63.7	-204.75	116.025	-232.05	93.275	32.3414	37.0734	11.8004	19.1509	-81.7453	72.3018	20.8663	52.209
204	30.2529	35.3876	-52.4046	14.0458	0.539175	58.6176	59.6983	54.8343	-64.56	52.1362	-7.56437	101.84	-112.913	24.0422	-15.9364	123.448	-59.1568	111.564	22.4747	94.6536	25.1228	57.2663	-0.539175	26.7449	-39.5463	80.1733	23.5554	73.2596	-39.3302	73.6918	-12.1849	25.4709	-77.35	63.7	-202.475	116.025	-234.325	93.275	32.8146	37.2622	11.4592	18.9667	-81.5337	72.502	21.4555	53.7946
205	29.8207	35.3876	-51.5401	13.1813	0.539175	58.6176	59.266	54.8343	-64.56	52.1362	-7.13212	101.84	-112.481	23.1777	-15.9364	124.745	-59.1568	110.699	21.8264	94.6536	26.8518	58.1308	-0.971425	27.1749	-39.7625	80.3894	24.2037	73.6918	-39.5463	73.9079	-12.4556	24.8043	-77.35	63.7	-202.475	116.025	-234.325	93.275	33.4857	37.128	11.2112	19.0326	-82.0274	72.1926	21.3782	52.9347
206	29.3884	35.3876	-50.6756	12.3168	0.539175	58.6176	58.8338	54.8343	-64.56	52.1362	-6.69987	101.84	-112.048	22.3132	-15.9364	126.042	-59.1568	109.835	21.3941	96.3827	28.5808	58.9953	-1.40368	27.6071	-39.3302	79.0927	25.0682	74.1241	-40.8431	74.7724	-12.2418	25.5141	-77.35	63.7	-202.475	116.025	-234.325	93.275	32.4824	37.9811	11.0292	19.4922	-82.5643	71.8627	22.0265	53.4307
207	29.8207	35.6037	-50.8918	12.3168	0.539175	59.266	59.266	55.0504	-64.1277	52.3523	-6.26763	101.84	-111.832	22.0971	-15.9364	126.042	-59.3729	109.619	20.9619	98.1117	29.0131	59.2114	-2.05205	27.1749	-38.898	77.7959	25.9327	74.5563	-42.1398	75.6369	-12.831	24.9112	-77.35	63.7	-197.925	116.025	-234.325	93.275	33.0398	38.1358	10.9723	19.0258	-82.4233	72.2017	21.8218	52.9438
208	31.1174	36.036	-52.1885	13.1813	0.539175	60.5628	60.5628	55.4827	-63.2632	52.7845	-5.83537	101.84	-111.832	22.5293	-15.9364	124.745	-59.8052	110.051	22.6909	98.5439	28.1486	58.7792	-2.91655	25.8804	-38.898	77.7959	25.5005	73.2596	-41.7076	74.7724	-12.3646	24.7133	-77.35	63.7	-197.925	116.025	-234.325	93.275	32.5643	38.4953	10.8062	19.1873	-82.5279	72.6021	21.9788	53.1736
209	32.4142	36.4682	-53.4852	14.0458	0.539175	61.8595	61.8595	55.9149	-62.3987	53.2168	-5.40312	101.84	-111.832	22.9616	-15.9364	123.448	-60.2374	110.483	24.4199	98.9762	27.2841	58.3469	-3.78105	24.5836	-38.898	77.7959	25.0682	71.9628	-41.2753	73.9079	-12.74	25.1456	-77.35	61.425	-197.925	120.575	-236.6	93.275	32.5484	37.8446	10.6379	19.044	-82.5415	72.0265	20.5865	53.0962
210	32.4142	36.4682	-52.1885	11.8846	0.106925	60.1305	61.4273	56.7794	-62.8309	52.7845	-7.13212	101.84	-111.832	22.5293	-15.5041	123.448	-58.5085	111.78	24.8521	98.9762	27.2841	57.9147	-2.4843	25.4481	-39.3302	78.2282	24.636	71.5306	-41.0592	73.6918	-12.5125	24.843	-77.35	61.425	-197.925	120.575	-236.6	93.275	32.9625	37.5398	10.1874	18.4457	-83.4834	72.2176	21.0005	53.1395
211	32.4142	36.4682	-50.8918	9.72335	-0.325325	58.4015	60.995	57.6439	-63.2632	52.3523	-8.86113	101.84	-111.832	22.0971	-15.0719	123.448	-56.7794	113.077	23.9876	98.5439	27.2841	57.4824	-1.18755	26.3126	-40.1947	79.0927	24.2037	71.9628	-41.0592	74.1241	-13.0994	24.7884	-77.35	61.425	-197.925	120.575	-236.6	93.275	33.786	38.4839	10.1419	18.7278	-83.2445	72.9661	20.707	54.2155
212	32.6303	36.4682	-50.8918	9.50722	-0.325325	57.7532	60.5628	58.0762	-63.2632	52.3523	-9.5095	102.056	-111.616	22.0971	-15.0719	123.232	-55.915	113.293	23.1231	98.1117	27.5002	57.6986	-0.7553	26.5288	-41.0592	79.9571	23.7715	72.3951	-41.0592	74.5563	-13.3133	24.6724	-77.35	61.425	-197.925	120.575	-236.6	93.275	33.0717	38.3019	10.1738	18.3228	-83.4879	72.3723	21.79	54.8025
213	33.0626	36.4682	-52.1885	11.2362	0.106925	58.1854	60.1305	58.0762	-62.8309	52.7845	-9.07725	102.489	-111.184	22.5293	-15.5041	122.8	-55.915	112.428	22.6909	98.5439	27.9325	58.563	-1.18755	26.0965	-41.0592	79.0927	25.0682	72.3951	-41.0592	74.5563	-13.2564	24.8703	-77.35	61.425	-197.925	120.575	-236.6	93.275	33.4107	38.1313	10.2466	18.4389	-83.9475	72.4474	21.0847	53.7696
214	33.4948	36.4682	-53.4852	12.9652	0.539175	58.6176	59.6983	58.0762	-62.3987	53.2168	-8.645	102.921	-110.752	22.9616	-15.9364	122.368	-55.915	111.564	22.2586	98.9762	28.3647	59.4275	-1.6198	25.6643	-41.0592	78.2282	26.365	72.3951	-41.0592	74.5563	-13.1472	24.6928	-77.35	59.15	-197.925	120.575	-236.6	93.275	32.9989	38.9002	10.6242	18.5344	-83.7587	72.1198	20.5364	54.6182
215	33.4948	36.4682	-54.3497	14.6942	0.106925	59.9144	60.995	58.5085	-61.9665	53.2168	-7.7805	103.785	-110.752	22.5293	-15.0719	121.935	-56.3472	110.267	22.2586	99.4084	27.9325	59.4275	-1.18755	25.232	-41.0592	78.012	27.2295	71.3144	-41.0592	74.1241	-13.5704	24.1764	-77.35	59.15	-197.925	120.575	-236.6	93.275	33.9544	38.3633	10.6265	17.9543	-83.8679	72.7113	20.4591	54.6228
216	33.4948	36.4682	-55.2142	16.4232	-0.325325	61.2111	62.2918	58.9407	-61.5342	53.2168	-6.916	104.648	-110.752	22.0971	-14.2074	121.503	-56.7794	108.97	22.6909	99.8407	27.5002	59.4275	-0.7553	24.7998	-41.0592	78.4443	27.6617	69.1532	-41.0592	73.2596	-13.1472	24.9317	-77.35	59.15	-197.925	120.575	-236.6	93.275	33.538	38.4998	10.4513	17.3719	-84.1955	72.3746	20.0245	54.666
217	33.9271	37.3328	-55.8626	17.0716	-0.325325	62.9401	63.1563	59.1568	-61.7503	53.6491	-6.0515	104.434	-110.752	22.0971	-14.4235	120.423	-56.7794	108.97	23.1231	100.273	27.5002	59.6437	-0.7553	25.232	-41.0592	78.8765	28.094	66.9919	-41.0592	72.3951	-13.6159	24.9499	-77.35	59.15	-197.925	120.575	-236.6	93.275	33.6268	38.0198	10.8791	17.3401	-83.2491	72.3382	19.9677	53.7105
218	34.7916	39.0617	-56.2949	16.6393	0.106925	65.1014	63.5885	59.1568	-62.6148	54.5136	-5.187	103.137	-110.752	22.5293	-15.7203	118.694	-56.3472	110.267	23.5554	100.273	27.9325	60.0759	-1.18755	26.5288	-41.0592	78.8765	28.9585	67.8564	-41.4915	74.1241	-13.3474	24.6974	-77.35	59.15	-197.925	120.575	-236.6	93.275	33.5881	38.9457	10.465	16.8236	-84.0135	71.5715	19.0941	54.1132
219	35.6561	40.7908	-56.7271	16.2071	0.539175	67.2627	64.0208	59.1568	-63.4793	55.3781	-4.3225	101.84	-110.752	22.9616	-17.017	116.965	-55.915	111.564	23.9876	100.273	28.3647	60.5082	-1.6198	27.8233	-41.0592	78.8765	29.823	68.7209	-41.9237	75.8531	-13.6932	24.3493	-79.625	59.15	-197.925	120.575	-236.6	93.275	33.2127	37.6922	10.7107	16.5256	-84.4753	71.5465	19.044	54.1268
220	34.7916	39.9262	-56.2949	17.5038	0.971425	66.3981	64.0208	59.5891	-63.0471	55.8103	-5.187	101.84	-110.752	23.3938	-16.1525	116.532	-55.915	112.428	23.9876	100.057	28.7969	60.9404	-2.05205	27.8233	-41.0592	78.8765	30.9036	68.5048	-42.356	76.5014	-13.8206	24.2538	-79.625	59.15	-197.925	122.85	-236.6	93.275	34.3434	38.3269	10.7312	16.7053	-83.7132	71.3781	19.3125	53.6377
221	33.9271	39.0617	-55.8626	18.8006	1.40367	65.5336	64.0208	60.0213	-62.6148	56.2425	-6.0515	101.84	-110.752	23.8261	-15.288	116.1	-55.915	113.293	23.5554	99.6245	29.2292	61.3727	-2.4843	27.8233	-41.0592	78.8765	32.2004	67.2081	-42.7882	76.0692	-13.4134	24.09	-79.625	59.15	-197.925	122.85	-236.6	93.275	33.3333	38.9389	10.9632	16.7349	-84.3161	71.8377	18.3592	53.7582
222	33.9271	39.0617	-55.2142	18.8006	1.40367	64.8853	64.0208	60.0213	-62.3987	55.5942	-6.26763	102.273	-110.968	24.0422	-14.4235	116.316	-56.3472	113.507	23.1231	99.1923	29.2292	61.8049	-2.70043	27.8233	-41.0592	78.8765	33.4971	65.9113	-43.2205	75.6369	-13.4293	23.9717	-79.625	59.15	-197.925	122.85	-236.6	93.275	34.3252	39.403	10.5332	16.0478	-84.2796	72.4132	18.6118	54.5932
223	34.7916	39.9262	-54.3497	17.5038	0.971425	64.453	64.0208	59.5891	-62.3987	53.8652	-5.83537	103.137	-111.4	24.0422	-13.559	117.181	-57.2117	113.077	23.1231	99.1923	28.7969	62.2372	-2.70043	27.8233	-41.0592	78.8765	33.9293	66.3436	-43.2205	76.5014	-13.4726	23.842	-79.625	59.15	-200.2	122.85	-236.6	93.275	33.356	38.9139	10.763	16.0638	-84.473	71.1779	18.5458	54.0563
224	35.6561	40.7908	-53.4852	16.2071	0.539175	64.0208	64.0208	59.1568	-62.3987	52.1362	-5.40312	104.002	-111.832	24.0422	-12.6945	118.045	-58.0762	112.644	23.1231	99.1923	28.3647	62.6694	-2.70043	27.8233	-41.0592	78.8765	34.3616	66.7758	-43.2205	77.3659	-13.4089	23.9762	-79.625	59.15	-200.2	122.85	-236.6	93.275	33.7337	38.5885	11.3341	15.4108	-83.5585	71.2576	18.2637	53.21
225	35.6561	41.223	-54.3497	16.2071	1.40367	65.7498	63.5885	59.1568	-62.8309	52.5684	-4.97088	104.434	-110.968	24.4744	-12.6945	118.477	-57.644	113.077	23.1231	99.4084	29.6615	63.5339	-2.70043	27.391	-41.2753	79.741	35.2261	66.9919	-43.4366	78.0143	-13.245	23.6327	-79.625	59.15	-200.2	122.85	-236.6	93.275	34.2137	38.4816	11.1498	14.8785	-84.2819	70.9823	17.7632	52.7345
226	35.6561	41.6552	-55.2142	16.2071	2.26817	67.4788	63.1563	59.1568	-63.2632	53.0007	-4.53863	104.864	-110.103	24.9067	-12.6945	118.91	-57.2117	113.507	23.1231	99.8407	30.9582	64.3984	-2.70043	26.9588	-41.7076	81.47	36.5229	66.9919	-43.8688	78.4466	-13.5226	23.164	-79.625	59.15	-200.2	125.125	-241.15	93.275	33.6245	38.9639	11.0747	15.0173	-84.4116	70.6911	17.4902	53.2214
227	36.0883	42.5198	-55.6465	15.7748	2.4843	68.3433	62.9402	59.373	-63.2632	53.0007	-4.3225	105.08	-110.319	25.5551	-12.4784	119.342	-56.3472	113.507	23.1231	100.273	31.6066	65.2629	-3.3488	26.9588	-42.1398	83.199	37.8196	66.9919	-44.3011	78.8788	-13.8707	23.023	-79.625	59.15	-200.2	125.125	-245.7	93.275	33.7064	37.7377	11.3159	14.4462	-84.5617	70.9755	17.5016	53.5649
228	36.9528	43.8165	-55.6465	14.9103	2.05205	68.3433	62.9402	59.8052	-62.8309	52.5684	-4.3225	105.08	-111.616	26.4196	-12.0461	119.774	-55.0527	113.077	23.1231	101.137	31.6066	66.1274	-4.64555	27.391	-42.5721	82.3345	37.8196	65.6952	-44.3011	78.8788	-14.494	23.0139	-77.35	61.425	-200.2	125.125	-245.7	93.275	34.448	38.6318	11.2772	14.4553	-84.0772	70.0563	17.133	53.1122
229	37.8173	45.1132	-55.6465	14.0458	1.6198	68.3433	62.9402	60.2374	-62.3987	52.1362	-4.3225	105.08	-112.913	27.2841	-11.6139	120.206	-53.756	112.644	23.1231	102.002	31.6066	66.9919	-5.9423	27.8233	-43.0043	81.47	37.8196	64.3984	-44.3011	78.8788	-14.7852	22.0789	-77.35	61.425	-200.2	127.4	-245.7	93.275	33.1672	38.741	11.6389	14.1209	-84.5253	70.0495	17.4265	52.3864
230	37.8173	44.2487	-56.9432	14.9103	1.6198	69.64	62.9402	61.1019	-61.9665	52.1362	-5.61925	105.512	-112.048	26.4196	-12.0461	117.613	-53.756	113.939	23.1231	102.218	30.7421	67.8564	-6.8068	28.2555	-43.6527	81.47	38.2518	63.1039	-44.3011	78.8788	-14.4531	22.1699	-77.35	61.425	-197.925	129.675	-245.7	93.275	33.8224	38.7296	11.8573	14.4121	-85.0122	69.8152	17.2172	52.7436
231	37.8173	43.3842	-58.24	15.7748	1.6198	70.9368	62.9402	61.9665	-61.5342	52.1362	-6.916	105.944	-111.184	25.5551	-12.4784	115.019	-53.756	115.236	23.1231	101.786	29.8776	68.7209	-7.6713	28.6878	-44.5172	82.3345	39.1164	61.8072	-44.3011	78.8788	-15.0673	22.0516	-77.35	61.425	-197.925	129.675	-245.7	93.275	33.3538	38.6477	11.7094	14.1687	-84.4821	69.8175	17.315	52.9119
232	38.0334	43.1681	-58.24	15.991	1.83593	71.8013	63.3724	62.3987	-61.3181	52.5684	-7.13212	106.377	-110.968	25.1228	-12.4784	113.723	-53.3237	115.668	23.1231	101.354	29.8776	69.3693	-7.6713	28.6878	-45.3817	83.199	39.9808	60.5104	-44.3011	78.8788	-15.0833	21.5806	-77.35	61.425	-197.925	129.675	-245.7	93.275	33.645	37.1212	12.1098	13.898	-84.8075	69.7197	16.8282	52.7527
233	38.4657	43.6004	-56.9432	15.5587	2.26817	72.2335	64.2369	62.3987	-61.3181	53.4329	-6.26763	106.809	-111.4	25.1228	-12.0461	113.723	-52.4592	115.236	23.9876	100.921	30.7421	69.8015	-6.8068	28.2555	-45.3817	83.199	38.6841	60.9427	-44.7333	78.0143	-15.3107	21.1962	-77.35	59.15	-197.925	129.675	-252.525	91	34.7961	39.3325	12.2145	13.5044	-85.2169	68.9666	16.6826	52.8937
234	38.898	44.0326	-55.6465	15.1265	2.70042	72.6658	65.1014	62.3987	-61.3181	54.2974	-5.40312	107.241	-111.832	25.1228	-11.6139	113.723	-51.5947	114.803	24.8521	100.489	31.6066	70.2338	-5.9423	27.8233	-45.3817	83.199	37.3873	61.375	-45.1656	77.1498	-14.9536	21.5738	-77.35	59.15	-197.925	129.675	-252.525	91	34.3957	38.791	11.9028	13.1654	-85.3284	68.9939	16.7485	51.3991
235	38.4657	43.1681	-55.6465	16.4232	2.70042	72.6658	65.9659	62.831	-61.7503	53.8652	-5.83537	107.673	-111.832	25.1228	-12.0461	113.723	-50.7302	115.236	25.5005	100.489	31.1743	69.3693	-6.37455	27.8233	-45.1656	82.9829	37.3873	61.375	-45.3817	77.1498	-14.9263	21.0938	-77.35	59.15	-197.925	129.675	-252.525	91	34.6437	37.7149	12.2122	13.1768	-84.63	69.2851	17.7632	52.35
236	38.0334	42.3036	-55.6465	17.72	2.70042	72.6658	66.8304	63.2632	-62.1826	53.4329	-6.26763	108.106	-111.832	25.1228	-12.4784	113.723	-49.8657	115.668	25.9327	100.921	30.7421	68.5048	-6.8068	27.8233	-44.7333	82.5507	38.6841	60.9427	-45.3817	78.0143	-14.974	20.8458	-77.35	59.15	-197.925	136.5	-252.525	91	34.5914	39.13	12.3851	12.7013	-84.7437	69.5308	16.8487	51.6243
237	38.0334	42.0875	-56.0788	17.72	2.26817	72.8819	67.4788	63.6954	-62.6148	53.4329	-6.26763	108.106	-111.832	25.1228	-12.0461	113.939	-49.8657	115.884	26.365	101.354	30.7421	67.8564	-7.23905	27.8233	-44.3011	82.1184	39.9808	60.5104	-45.3817	78.8788	-14.5623	20.9823	-77.35	59.15	-197.925	136.5	-252.525	91	33.8816	38.2496	12.3828	12.8606	-84.9531	69.615	17.3287	51.1739
238	38.4657	42.5198	-56.9432	16.4232	1.40367	73.3141	67.911	64.1277	-63.0471	53.8652	-5.83537	107.673	-111.832	25.1228	-10.7494	114.371	-50.7302	115.884	25.9327	101.786	31.1743	67.4242	-7.6713	27.8233	-45.1656	82.9829	39.9808	60.0782	-46.2462	78.8788	-14.1755	20.5751	-77.35	59.15	-197.925	136.5	-252.525	91	34.0385	37.6535	12.6149	12.6831	-84.6891	69.6901	17.6244	51.6493
239	38.898	42.952	-57.8077	15.1265	0.539175	73.7464	68.3433	64.5599	-63.4793	54.2974	-5.40312	107.241	-111.832	25.1228	-9.4549	114.803	-51.5947	115.884	25.5005	102.218	31.6066	66.9919	-8.10355	27.8233	-46.0301	83.8474	39.9808	59.646	-47.1107	78.8788	-13.716	18.721	-77.35	59.15	-197.925	136.5	-252.525	91	34.282	39.2233	12.5557	12.6217	-84.5891	69.954	16.8487	50.1933
240	38.4657	42.952	-57.3755	15.5587	0.106925	73.3141	67.911	64.5599	-63.9116	54.7297	-5.83537	108.97	-111.4	25.1228	-10.3171	113.074	-50.7302	116.316	25.0682	102.434	30.7421	67.4242	-8.5358	28.2555	-46.2462	83.8474	39.9808	58.7815	-47.1107	78.6627	-14.1801	18.2136	-77.35	59.15	-197.925	136.5	-252.525	91	35.1032	38.4407	12.7946	12.3896	-85.0099	71.137	16.3322	51.8222
241	38.0334	42.952	-56.9432	15.991	-0.325325	72.8819	67.4788	64.5599	-64.3438	55.1619	-6.26763	110.699	-110.968	25.1228	-11.1816	111.345	-49.8657	116.748	24.636	102.434	29.8776	67.8564	-8.96805	28.6878	-45.814	82.9829	39.9808	57.4847	-46.2462	78.2304	-14.0117	17.9316	-77.35	59.15	-197.925	136.5	-252.525	91	34.5937	39.0868	12.715	12.0302	-84.4685	70.0222	16.0365	51.1192
242	37.8173	43.1681	-56.9432	16.8555	-0.325325	73.3141	67.4788	65.2083	-64.1277	55.5942	-6.48375	110.915	-110.968	25.3389	-11.83	110.051	-49.0012	116.532	24.2037	102.434	29.8776	68.0725	-9.4003	28.9039	-45.3817	82.1184	39.9808	56.188	-45.3817	77.7982	-13.2792	18.2682	-77.35	59.15	-197.925	136.5	-252.525	91	33.8998	39.4098	12.9561	12.0029	-84.3706	70.6638	16.2435	51.4514
243	37.8173	43.6004	-57.3755	18.1522	0.106925	74.6109	67.911	66.5051	-63.2632	56.0264	-6.48375	109.619	-111.4	25.7712	-12.2622	109.186	-48.1367	115.668	25.5005	102.434	30.7421	68.0725	-9.83255	28.9039	-45.814	83.4151	40.8453	55.7557	-46.6784	78.6627	-13.1495	17.6199	-77.35	59.15	-197.925	136.5	-252.525	91	34.5846	39.064	12.608	11.6935	-84.8757	70.1951	15.6497	50.5141
244	37.8173	44.0326	-57.8077	19.449	0.539175	75.9076	68.3433	67.8018	-62.3987	56.4587	-6.48375	108.322	-111.832	26.2034	-12.6945	108.322	-47.2722	114.803	26.7972	102.434	31.6066	68.0725	-10.2648	28.9039	-46.2462	84.7119	41.7098	55.3234	-47.9752	79.5272	-13.22	17.6972	-77.35	59.15	-197.925	136.5	-252.525	91	34.5004	37.9743	12.4624	11.7981	-84.6687	69.9927	15.3426	51.258
245	38.6818	44.8971	-57.8077	18.1522	0.539175	74.6109	70.0723	68.2341	-62.8309	57.3232	-6.0515	109.186	-111.4	26.6357	-10.9655	106.593	-46.84	114.803	27.2295	102.65	29.8776	67.6403	-10.6971	28.0394	-46.0301	84.4958	42.3582	54.6751	-47.9752	79.7433	-13.5385	17.4151	-77.35	59.15	-197.925	136.5	-252.525	91	34.8644	38.6067	12.6558	11.6457	-83.5858	69.3943	16.2571	48.9921
246	39.5463	45.7616	-57.8077	16.8555	0.539175	73.3141	71.8013	68.6663	-63.2632	58.1877	-5.61925	110.051	-110.968	27.0679	-9.23878	104.864	-46.4077	114.803	26.7972	103.083	28.1486	67.2081	-11.1293	27.1749	-45.1656	82.7668	42.7882	53.8106	-46.6784	79.3111	-13.0608	16.7212	-77.35	59.15	-197.925	136.5	-252.525	91	34.5049	37.2895	12.6149	11.7663	-84.4412	70.0723	13.9116	49.8566
247	39.7625	46.1916	-57.8077	17.0716	0.7553	72.6658	72.8819	68.0179	-63.9116	58.6199	-5.61925	110.483	-110.535	27.5002	-8.37428	103.567	-46.4077	115.019	26.365	103.515	27.5002	67.4242	-11.1293	27.1749	-44.3011	81.0378	43.2205	52.9461	-45.3817	78.8788	-12.5011	17.0784	-75.075	54.6	-197.925	136.5	-252.525	91	34.6687	37.922	12.4169	10.6242	-83.8269	70.823	15.4518	50.4641
248	39.3302	46.1916	-57.8077	18.8006	1.18755	72.6658	73.3141	66.2889	-64.7761	58.6199	-6.0515	110.483	-110.103	27.9324	-8.37428	102.703	-46.84	115.452	25.9327	103.947	27.9325	68.2887	-10.6971	28.0394	-45.1656	82.3345	43.6527	52.9461	-47.1107	78.8788	-11.4865	17.1512	-75.075	54.6	-197.925	136.5	-252.525	91	34.9713	38.3747	12.5876	11.0292	-84.034	70.5523	15.0264	52.2886
249	38.898	46.1916	-57.8077	20.5296	1.6198	72.6658	73.7464	64.5599	-65.6406	58.6199	-6.48375	110.483	-109.671	28.3647	-8.37428	101.838	-47.2722	115.884	25.5005	104.379	28.3647	69.1532	-10.2648	28.9039	-46.0301	83.6313	44.085	52.9461	-48.8397	78.8788	-10.8062	16.5438	-72.8	50.05	-200.2	138.775	-252.525	91	32.8396	38.179	12.5171	10.3376	-83.9589	70.4818	14.5805	51.0328
250	39.3302	45.7616	-57.3755	18.8006	1.6198	72.2335	72.8819	66.7212	-64.3438	58.6199	-5.61925	110.915	-110.103	27.9324	-8.37428	99.6769	-47.2722	116.316	25.7166	104.163	27.9325	68.7209	-11.1293	29.3361	-46.8946	84.7119	44.085	53.3783	-49.0558	79.3111	-10.7448	17.1353	-72.8	50.05	-200.2	138.775	-252.525	91	34.332	38.0926	12.4693	9.77112	-84.0863	70.7639	15.2971	51.299
251	39.7625	45.3294	-56.9432	17.0716	1.6198	71.8013	72.0174	68.8825	-63.0471	58.6199	-4.75475	111.348	-110.535	27.5002	-8.37428	97.5156	-47.2722	116.748	26.5811	103.299	27.5002	68.2887	-11.9938	29.7684	-47.7591	85.5764	43.6527	54.2428	-47.7591	80.1756	-9.39347	17.1876	-72.8	50.05	-200.2	138.775	-252.525	91	34.5368	39.1778	12.7946	9.24788	-84.1386	70.1792	15.2448	51.6311
252	39.9786	45.3294	-57.3755	16.6393	1.83593	72.0174	71.5851	69.5308	-62.6148	58.1877	-4.53863	111.131	-110.752	27.5002	-8.37428	96.2189	-47.4883	116.748	27.4456	102.434	28.1486	67.4242	-12.4261	30.2006	-48.6236	86.4409	43.2205	55.1073	-46.4623	81.0401	-8.95667	16.9351	-72.8	45.5	-200.2	138.775	-252.525	91	34.6369	38.3042	12.3987	9.14777	-84.7119	70.0563	14.8649	51.0715
253	39.9786	45.7616	-58.6722	17.5038	2.26817	72.8819	71.5851	68.6663	-63.0471	57.3232	-4.97088	110.267	-110.752	27.9324	-8.37428	95.7866	-47.9206	116.316	27.0133	102.866	29.8776	66.1274	-12.4261	30.6329	-48.6236	86.4409	43.6527	52.5138	-48.6236	81.4723	-8.61088	17.2741	-72.8	45.5	-200.2	138.775	-252.525	91	33.4971	38.179	12.3464	8.50168	-83.8883	69.8175	14.9854	50.3958
254	39.9786	46.1916	-59.969	18.3683	2.70042	73.7464	71.5851	67.8018	-63.4793	56.4587	-5.40312	109.402	-110.752	28.3647	-8.37428	95.3544	-48.3528	115.884	26.5811	103.299	31.6066	64.8307	-12.4261	31.0651	-48.6236	86.4409	44.085	49.9203	-50.7826	81.9046	-8.15132	17.3082	-72.8	45.5	-200.2	138.775	-252.525	91	34.8849	38.0152	12.5648	9.25698	-84.2137	69.5559	15.5997	51.6903
255	39.9786	45.3294	-59.5367	17.9361	2.70042	72.8819	72.0174	67.8018	-63.9116	58.1877	-6.26763	111.131	-111.184	27.9324	-8.80653	93.1931	-47.9206	115.884	26.7972	103.299	29.4453	65.6952	-12.4261	30.6329	-48.8397	87.0893	44.3011	48.4075	-51.6471	82.3368	-7.83282	16.7212	-72.8	43.225	-197.925	143.325	-252.525	91	33.8179	38.2245	12.2691	9.17507	-84.1841	70.0632	15.2971	51.6834
256	39.9786	44.4649	-59.1045	17.5038	2.70042	72.0174	72.4497	67.8018	-64.3438	59.9144	-7.13212	112.86	-111.616	27.5002	-9.23878	91.0318	-47.4883	115.884	27.6617	102.866	27.2841	66.5597	-12.4261	30.2006	-49.272	88.386	44.3011	47.9752	-51.2148	82.7691	-7.63035	17.3423	-72.8	43.225	-197.925	143.325	-252.525	91	34.6027	38.5021	12.6945	9.00445	-83.877	68.7915	14.651	50.4663
257	40.1947	44.4649	-58.8884	17.5038	2.91655	72.0174	72.8819	67.8018	-64.1277	60.7789	-7.13212	113.725	-111.832	27.0679	-10.101	89.519	-47.2722	116.1	28.5262	102.434	26.8518	66.3436	-12.2099	29.7684	-49.7019	89.6828	44.3011	47.543	-50.7826	83.2013	-7.5894	17.472	-72.8	43.225	-197.925	143.325	-252.525	91	34.9941	38.4566	12.5352	8.6268	-84.3616	67.8314	14.8102	50.4299
258	40.627	45.3294	-58.8884	17.9361	3.3488	72.8819	73.3141	67.8018	-63.2632	60.7789	-6.26763	113.725	-111.832	26.6357	-11.3978	88.6545	-47.2722	116.532	28.094	102.866	28.1486	65.0468	-11.7777	29.3361	-49.7019	89.6828	45.5978	47.1107	-51.2148	82.7691	-7.07298	17.4037	-70.525	45.5	-197.925	143.325	-252.525	91	34.2501	38.377	12.5876	7.92382	-83.6085	68.1499	15.9136	50.4572
259	41.0592	46.1916	-58.8884	18.3683	3.78105	73.7464	73.7464	67.8018	-62.3987	60.7789	-5.40312	113.725	-111.832	26.2034	-12.6945	87.7923	-47.2722	116.965	27.6617	103.299	29.4453	63.75	-11.3454	28.9039	-49.7019	89.6828	46.8946	46.6784	-51.6471	82.3368	-6.79998	18.2091	-70.525	45.5	-197.925	143.325	-252.525	91	34.5459	37.4852	12.6376	7.60305	-83.6085	67.315	15.5906	51.2171
260	41.9237	45.7616	-58.8884	18.8006	3.3488	73.7464	74.1787	68.6663	-62.8309	60.7789	-5.40312	115.454	-111.4	26.6357	-10.9655	88.2222	-46.4077	116.965	26.7972	103.299	29.0131	64.1823	-12.6422	28.9039	-50.1342	89.8989	47.3268	46.6784	-51.8632	82.3368	-6.29265	18.291	-68.25	45.5	-195.65	143.325	-252.525	91	32.9852	38.311	12.5603	6.72945	-83.3765	67.8587	14.8421	51.9291
261	42.7882	45.3294	-58.8884	19.2328	2.91655	73.7464	74.6109	69.5308	-63.2632	60.7789	-5.40312	117.183	-110.968	27.0679	-9.23878	88.6545	-45.5432	116.965	25.5005	102.866	28.5808	64.6146	-13.9389	28.9039	-50.9987	90.3311	46.8946	47.1107	-51.8632	82.7691	-5.90818	18.6004	-68.25	45.5	-193.375	143.325	-252.525	91	34.8234	38.2746	12.5557	6.57475	-82.8987	66.9055	15.586	50.7712
262	43.4366	45.5455	-59.3206	19.0167	2.26817	74.3948	75.2593	70.1792	-63.2632	60.3466	-5.40312	117.831	-110.535	27.2841	-8.5904	88.4384	-45.5432	116.965	24.2037	102.434	27.9325	64.8307	-14.5873	29.12	-51.8632	90.7634	46.4623	47.543	-51.8632	83.2013	-5.27118	19.3602	-68.25	45.5	-193.375	143.325	-252.525	91	34.0977	37.9584	12.8242	6.01738	-82.5529	66.5233	14.9263	50.8713
263	43.8688	46.4077	-60.1851	18.1522	1.40367	75.6915	76.1238	70.6114	-62.8309	59.4821	-5.40312	117.399	-110.103	27.2841	-9.02265	87.5761	-46.4077	116.965	24.636	103.299	27.0679	64.8307	-14.5873	29.5522	-50.9987	90.3311	47.7591	45.8139	-53.1599	82.7691	-5.2871	19.0122	-68.25	45.5	-193.375	143.325	-252.525	91	33.4493	38.0198	12.8173	5.4418	-82.7144	67.4651	15.3767	51.101
264	44.3011	47.2722	-61.0496	17.2877	0.539175	76.9883	76.9883	71.0437	-62.3987	58.6199	-5.40312	116.967	-109.671	27.2841	-9.4549	86.7116	-47.2722	116.965	25.0682	104.163	26.2034	64.8307	-14.5873	29.9845	-50.1342	89.8989	49.0558	44.0849	-54.4567	82.3368	-5.48275	19.176	-68.25	45.5	-193.375	143.325	-252.525	91	34.2524	38.377	13.0881	4.84347	-82.5893	66.3754	14.1482	50.3594
265	44.3011	46.84	-59.7529	18.1522	1.40367	77.4205	76.556	71.476	-61.9665	59.4821	-5.83537	117.399	-109.671	27.7163	-10.3171	86.7116	-46.4077	115.668	25.2844	104.595	27.5002	64.3984	-15.0196	29.9845	-50.3503	89.8989	49.7042	42.356	-55.1051	82.3368	-5.02092	19.747	-68.25	45.5	-193.375	143.325	-252.525	91	35.5423	38.5203	13.7023	4.90262	-82.6917	67.8564	15.4973	51.8768
266	44.3011	46.4077	-58.4561	19.0167	2.26817	77.8528	76.1238	71.9082	-61.5342	60.3466	-6.26763	117.831	-109.671	28.1486	-11.1816	86.7116	-45.5432	114.371	25.2844	104.595	28.7969	63.9662	-15.4518	29.9845	-51.6471	90.3311	49.7042	40.6269	-55.1051	82.7691	-4.60915	20.4704	-68.25	45.5	-191.1	143.325	-252.525	91	34.2729	37.4852	14.1005	4.57275	-83.3082	67.3423	15.3426	51.1579
267	44.5172	47.0561	-58.0239	19.449	2.26817	78.4989	76.1238	71.9082	-61.3181	60.7789	-6.0515	118.047	-109.455	28.1486	-12.0461	86.2794	-44.4626	114.371	25.2844	104.595	29.6615	63.5339	-16.1002	30.2006	-52.9438	90.7634	49.7042	38.9002	-55.1051	83.2013	-5.1961	20.5523	-68.25	43.225	-191.1	143.325	-252.525	91	33.0125	38.559	14.8694	3.71052	-83.7814	67.3468	15.9205	52.6208
268	44.9495	48.7851	-58.4561	19.449	1.40367	79.3634	76.556	71.476	-61.3181	60.7789	-5.187	118.047	-109.023	27.7163	-12.9106	85.4149	-43.1659	115.668	24.8521	103.299	30.0937	63.1017	-16.9647	30.6329	-52.0793	90.3311	49.2719	38.9002	-54.6728	83.2013	-4.23378	20.9232	-68.25	43.225	-191.1	143.325	-252.525	91	33.9112	38.1722	15.3654	3.44662	-83.9611	68.0157	16.2094	51.4127
269	45.3817	50.5141	-58.8884	19.449	0.539175	80.2279	76.9883	71.0437	-61.3181	60.7789	-4.3225	118.047	-108.59	27.2841	-13.7751	84.5504	-41.8691	116.965	24.4199	102.002	30.526	62.6694	-17.8292	31.0651	-51.2148	89.8989	48.8397	38.9002	-54.2406	83.2013	-3.66048	21.0801	-68.25	43.225	-191.1	143.325	-252.525	91	33.9248	38.8456	15.3358	2.39558	-83.7723	68.3683	15.7111	51.5151
270	44.9495	49.6496	-59.3206	19.8812	0.971425	80.2279	76.1238	71.0437	-62.1826	61.2111	-4.3225	118.047	-108.158	28.1486	-15.0719	84.5504	-42.3014	116.532	24.636	101.57	31.3905	63.5339	-17.3969	31.0651	-51.2148	90.115	49.7042	38.0357	-54.4567	83.2013	-3.4307	21.6716	-68.25	43.225	-191.1	145.6	-252.525	91	34.605	38.9321	15.6566	2.3114	-84.109	68.9848	15.6861	52.3409
271	44.5172	48.7851	-59.7529	20.3135	1.40367	80.2279	75.2593	71.0437	-63.0471	61.6434	-4.3225	118.047	-107.726	29.0131	-16.3686	84.5504	-42.7336	116.1	25.5005	102.002	32.255	64.3984	-16.9647	31.0651	-52.0793	90.9795	51.8655	36.3067	-55.3212	83.2013	-2.10437	21.8309	-65.975	40.95	-191.1	145.6	-252.525	91	33.8111	38.6522	16.0501	1.78133	-85.0782	69.0849	16.6644	50.2092
272	44.3011	48.569	-59.5367	20.0973	1.83593	80.6601	75.6915	71.0437	-62.8309	61.8595	-4.10638	118.696	-107.294	29.2292	-17.6654	84.1181	-42.5175	116.1	26.365	102.434	32.255	64.8307	-16.5324	30.2006	-52.9438	91.844	54.0267	34.5777	-56.1857	83.2013	-2.3933	22.3541	-63.7	40.95	-191.1	145.6	-252.525	91	34.1591	39.1027	15.9932	1.15342	-85.7334	70.5318	16.8236	51.9064
273	44.3011	49.0012	-58.6722	19.2328	2.26817	81.5246	77.4183	71.0437	-61.5342	61.8595	-3.67413	119.993	-106.861	28.7969	-18.9621	83.2536	-41.653	116.532	25.0682	102.434	31.3905	64.8307	-16.1002	28.4716	-52.9438	91.844	54.459	33.7132	-55.7534	83.2013	-1.79043	22.4247	-63.7	40.95	-191.1	145.6	-252.525	91	34.1933	38.6818	16.4073	0.602875	-88.2313	71.8309	17.431	51.8859
274	44.3011	49.4335	-57.8077	18.3683	2.70042	82.3891	79.1472	71.0437	-60.2374	61.8595	-3.24188	121.289	-106.429	28.3647	-20.2589	82.3891	-40.7885	116.965	23.7715	102.434	30.526	64.8307	-15.6679	26.7449	-52.9438	91.844	54.8912	32.8487	-55.3212	83.2013	-0.85995	22.9434	-63.7	38.675	-191.1	147.875	-252.525	91	33.5654	37.9083	16.3732	-0.5915	-88.1904	72.2699	15.7407	52.2477
275	43.8688	49.4335	-58.6722	19.2328	1.83593	82.3891	79.1472	71.476	-60.6697	62.724	-2.37738	121.722	-106.429	28.7969	-19.8266	82.8214	-39.924	116.532	22.6909	102.434	30.526	64.3984	-16.1002	27.1749	-52.7277	91.4118	56.188	31.3359	-55.1051	83.2013	0.1001	23.3938	-63.7	38.675	-188.825	150.15	-252.525	91	35.1192	38.8593	16.7326	-1.11475	-87.6785	72.5839	16.9192	52.9984
276	43.4366	49.4335	-59.5367	20.0973	0.971425	82.3891	79.1472	71.9082	-61.1019	63.5885	-1.51288	122.154	-106.429	29.2292	-19.3944	83.2536	-39.0595	116.1	21.8264	102.434	30.526	63.9662	-16.5324	27.6071	-52.2954	90.5473	58.3492	29.1746	-55.1051	83.2013	-0.38675	22.6931	-63.7	38.675	-188.825	150.15	-252.525	91	33.7792	39.5964	17.067	-1.80635	-87.9538	71.799	16.0296	51.6425
277	43.8688	49.8657	-59.969	20.5296	0.7553	81.7408	79.1472	71.6921	-61.3181	64.0208	-0.8645	121.938	-106.429	29.2292	-18.9621	82.8214	-39.924	115.019	20.9619	102.434	30.7421	64.1823	-16.9647	28.2555	-51.8632	89.6828	60.5104	27.0134	-55.1051	83.2013	-0.056875	23.5349	-63.7	38.675	-188.825	152.425	-252.525	91	34.8757	39.4894	17.3696	-2.07707	-87.79	71.6693	16.7667	52.7482
278	45.1656	50.7302	-59.969	20.5296	1.18755	80.444	79.1472	70.8276	-61.3181	64.0208	-0.43225	121.073	-106.429	28.7969	-18.5299	81.5246	-42.5175	113.293	21.3941	102.866	31.1743	65.0468	-17.3969	29.12	-52.2954	90.9795	60.9427	27.8779	-55.1051	84.4981	0.006825	23.7578	-63.7	38.675	-188.825	152.425	-252.525	91	34.009	39.1755	17.6153	-2.7118	-87.5466	71.9378	16.289	53.9698
279	46.4623	51.5947	-59.969	20.5296	1.6198	79.1472	79.1472	69.9631	-61.3181	64.0208	0	120.209	-106.429	28.3647	-18.0976	80.2279	-45.111	111.564	21.8264	103.299	31.6066	65.9113	-17.8292	29.9845	-52.7277	92.2763	61.375	28.7424	-55.1051	85.7948	0.470925	23.5895	-63.7	38.675	-188.825	152.425	-252.525	91	34.6027	38.4111	17.6858	-3.4671	-88.3201	71.2985	15.8954	53.376
280	46.4623	51.1625	-60.8335	20.5296	1.6198	78.715	80.8763	70.8276	-61.7503	64.0208	0	121.505	-106.429	28.3647	-18.0976	80.2279	-43.382	113.723	22.0425	103.947	31.6066	65.0468	-17.8292	29.5522	-52.7277	92.7085	62.6717	27.8779	-55.1051	86.6593	1.3559	23.8579	-63.7	36.4	-188.825	152.425	-252.525	91	34.3935	38.1495	17.7359	-3.68095	-88.5839	70.8253	16.5825	53.5012
281	46.4623	50.7302	-61.6957	20.5296	1.6198	78.2827	82.6052	71.6921	-62.1826	64.0208	0	122.802	-106.429	28.3647	-18.0976	80.2279	-41.653	115.884	22.0425	104.812	31.6066	64.1823	-17.8292	29.12	-52.2954	92.2763	64.833	25.2844	-55.1051	87.0916	1.99063	23.478	-63.7	36.4	-184.275	154.7	-252.525	91	34.2865	38.3155	17.8565	-3.83793	-88.9138	70.0268	17.224	53.2009
282	46.6784	50.5141	-61.6957	20.3135	1.83593	78.2827	82.8214	72.3405	-61.9665	64.0208	-0.43225	123.234	-106.429	28.1486	-18.0976	80.0118	-40.5724	116.748	22.0425	105.676	31.3905	64.1823	-17.8292	29.5522	-51.8632	91.844	66.9919	22.6909	-55.1051	87.5238	2.74593	23.5849	-63.7	34.125	-182	154.7	-252.525	91	34.4276	39.6191	18.175	-4.5682	-89.6327	69.3716	16.5893	52.8778
283	47.1107	50.5141	-60.8335	19.8812	2.26817	78.715	81.5246	72.7727	-61.1019	64.0208	-1.29675	122.802	-106.429	27.7163	-18.0976	79.5795	-40.1401	116.316	22.4747	104.812	30.9582	65.0468	-17.8292	30.849	-51.8632	92.7085	67.4242	21.3941	-54.6728	88.8206	3.34425	23.7783	-63.7	34.125	-182	154.7	-252.525	91	33.4334	37.7149	18.1636	-4.22013	-90.0013	69.6651	16.7281	53.1099
284	47.5429	50.5141	-59.969	19.449	2.70042	79.1472	80.2279	73.2049	-60.2374	64.0208	-2.16125	122.37	-106.429	27.2841	-18.0976	79.1472	-39.7079	115.884	22.907	103.947	30.526	65.9113	-17.8292	32.1458	-51.8632	93.573	67.8564	20.0974	-54.2406	90.1173	3.6036	23.6759	-61.425	31.85	-182	154.7	-252.525	91	34.6437	38.8456	18.1272	-5.17335	-90.4767	69.731	16.3595	52.6481
285	47.1107	50.9464	-59.5367	19.0167	1.83593	78.715	80.2279	74.0694	-60.2374	64.453	-1.29675	122.37	-106.861	28.1486	-18.0976	79.1472	-40.1401	115.019	23.5554	103.515	30.526	66.3436	-18.2614	31.7135	-51.8632	94.003	68.9371	19.449	-54.0244	90.3334	3.96988	24.1628	-61.425	29.575	-182	154.7	-252.525	91	33.7929	37.7923	18.1363	-5.278	-90.8203	69.1555	17.8224	52.0429
286	46.6784	51.3786	-59.1045	18.5845	0.971425	78.2827	80.2279	74.9339	-60.2374	64.8853	-0.43225	122.37	-107.294	29.0131	-18.0976	79.1472	-40.5724	114.155	24.4199	103.515	30.526	66.7758	-18.6937	31.2812	-51.8632	94.003	70.6661	19.449	-54.0244	89.4689	4.3862	23.6896	-61.425	29.575	-182	154.7	-252.525	91	34.7529	38.5157	18.4184	-6.41323	-90.5814	70.5159	17.5198	52.5389
287	46.2462	51.3786	-59.1045	18.5845	0.7553	78.9311	80.444	74.9339	-59.8052	65.1014	0.43225	123.018	-107.077	29.0131	-18.3138	78.715	-41.2207	113.723	25.2844	103.515	30.0937	66.7758	-18.6937	30.849	-51.8632	94.003	72.3951	19.449	-54.0244	88.6044	4.5045	23.6964	-59.15	29.575	-182	154.7	-252.525	91	34.9167	37.9038	18.6118	-6.61798	-90.5859	70.8207	17.861	51.8245
288	45.8139	50.9464	-59.5367	19.0167	1.18755	80.6601	80.8763	74.0694	-58.9407	65.1014	1.29675	124.315	-106.213	28.1486	-18.746	77.8505	-42.0852	113.723	25.2844	103.515	29.2292	66.3436	-18.2614	30.4167	-51.8632	93.1408	72.8273	17.72	-54.0244	87.7399	5.51915	23.9967	-59.15	29.575	-182	161.525	-252.525	91	34.0408	38.766	18.5162	-6.2062	-89.3165	73.4825	18.2	51.713
289	45.3817	50.5141	-59.969	19.449	1.6198	82.3891	81.3085	73.2049	-58.0762	65.1014	2.16125	125.612	-105.351	27.2841	-19.1782	76.986	-42.9497	113.723	25.2844	103.515	28.3647	65.9113	-17.8292	29.9845	-51.8632	92.2763	73.2596	15.9932	-54.0244	86.8754	6.24032	24.454	-59.15	29.575	-182	161.525	-252.525	91	34.2433	38.6727	18.3661	-6.18573	-89.3643	75.1023	16.8305	52.3136
290	45.8139	50.5141	-59.1045	19.8812	1.6198	81.9569	83.0375	72.7727	-58.0762	65.5336	3.02575	126.044	-105.351	27.7163	-16.5847	75.6892	-42.0852	113.293	25.2844	103.731	29.2292	67.6403	-18.6937	28.6878	-51.8632	91.6279	73.0434	14.4804	-54.0244	86.8754	6.09018	24.2993	-59.15	29.575	-182	161.525	-252.525	91	34.1773	39.2665	18.3729	-6.9524	-88.3837	75.0454	18.1204	52.2408
291	46.2462	50.5141	-58.24	20.3135	1.6198	81.5246	84.7665	72.3405	-58.0762	65.9659	3.89025	126.476	-105.351	28.1486	-13.9913	74.3925	-41.2207	112.86	25.2844	104.163	30.0937	69.3693	-19.5582	27.391	-51.8632	91.1957	72.1789	13.1836	-54.0244	87.7399	7.19355	24.6041	-59.15	29.575	-182	161.525	-252.525	91	34.7233	39.9991	18.5822	-7.2527	-88.7477	74.0876	17.34	51.1124
292	46.6784	50.5141	-58.24	20.7457	2.05205	81.7408	84.9826	71.6921	-58.2923	65.9659	4.53863	126.26	-105.135	28.1486	-13.3429	74.1764	-41.0046	112.644	25.2844	104.595	30.526	69.8015	-19.7743	27.391	-51.8632	90.7634	71.3144	11.8869	-54.0244	88.6044	7.31185	24.8521	-59.15	29.575	-182	161.525	-252.525	91	34.539	39.1869	18.4798	-7.41878	-89.4007	75.2115	17.7154	50.8463
293	47.1107	50.5141	-59.1045	21.178	2.91655	82.6053	83.6859	70.8276	-58.7246	65.5336	4.97087	125.396	-104.702	27.7163	-14.6396	75.0409	-41.4369	112.644	25.2844	105.028	30.526	68.937	-19.3421	28.6878	-52.2954	91.6279	71.7467	11.0224	-54.8889	89.0367	8.03303	25.6961	-59.15	27.3	-182	161.525	-252.525	91	34.3093	38.0812	18.8324	-7.08208	-89.2505	74.2196	18.5799	51.0419
294	47.5429	50.5141	-59.969	21.6102	3.78105	83.4697	82.3891	69.9631	-59.1568	65.1014	5.40312	124.531	-104.27	27.2841	-15.9364	75.9054	-41.8691	112.644	25.2844	105.46	30.526	68.0725	-18.9098	29.9845	-52.7277	92.4924	72.1789	10.1579	-55.7534	89.4689	8.75875	25.6256	-59.15	27.3	-182	161.525	-252.525	91	34.1591	38.3815	19.0986	-7.02292	-89.5804	74.686	17.5403	52.532
295	47.1107	50.0819	-58.6722	21.178	2.91655	83.4697	85.8471	71.6921	-59.1568	65.9659	5.40312	124.099	-105.135	26.8518	-14.6396	74.6086	-41.4369	112.212	25.2844	105.244	30.526	68.5048	-18.9098	29.9845	-52.7277	92.9246	73.0434	9.29337	-55.7534	89.4689	8.24232	25.4049	-56.875	27.3	-182	161.525	-252.525	91	34.5027	39.833	19.0281	-7.13895	-88.7659	75.7393	18.0362	52.3932
296	46.6784	49.6496	-57.3755	20.7457	2.05205	83.4697	89.3051	73.4211	-59.1568	66.8304	5.40312	123.667	-105.997	26.4196	-13.3429	73.3119	-41.0046	111.78	25.2844	104.379	30.526	68.937	-18.9098	29.9845	-52.2954	92.9246	74.3402	8.42887	-54.8889	89.0367	8.82473	25.323	-56.875	27.3	-182	161.525	-252.525	91	34.0385	38.4907	19.722	-7.5439	-89.246	75.6665	18.4411	52.1703
297	46.2462	49.6496	-56.7271	20.7457	1.83593	83.4697	90.3857	73.8533	-59.1568	67.0465	5.40312	123.018	-106.213	26.6357	-12.9106	72.8796	-41.2207	111.348	25.2844	103.515	30.526	69.3693	-18.6937	29.5522	-51.8632	92.9246	75.6369	7.56438	-54.0244	88.6044	9.15232	25.2525	-56.875	27.3	-182	161.525	-252.525	91	35.6197	39.428	19.9154	-7.49613	-90.0331	75.9099	18.4116	50.7029
298	45.8139	50.0819	-56.7271	21.178	2.26817	83.4697	89.089	72.9888	-59.1568	66.6143	5.40312	122.154	-105.781	27.5002	-13.3429	73.3119	-42.0852	110.915	25.2844	104.812	30.526	69.8015	-18.2614	28.6878	-52.2954	92.4924	74.3402	7.13212	-54.8889	89.0367	9.39803	25.6188	-56.875	27.3	-182	161.525	-252.525	91	34.6255	39.9467	19.4808	-7.83055	-90.5655	76.6584	18.721	51.8586
299	45.3817	50.5141	-56.7271	21.6102	2.70042	83.4697	87.7922	72.1243	-59.1568	66.182	5.40312	121.289	-105.351	28.3647	-13.7751	73.7441	-42.9497	110.483	25.2844	106.108	30.526	70.2338	-17.8292	27.8233	-52.7277	92.0602	73.0434	6.69988	-55.7534	89.4689	9.828	25.6893	-56.875	27.3	-182	161.525	-252.525	91	34.7597	40.5473	19.4149	-8.26053	-91.6324	76.9541	19.0031	52.3932
300	45.8139	50.0819	-56.7271	21.6102	2.26817	83.0375	89.5213	73.8533	-58.7246	66.182	6.26763	120.857	-105.781	28.7969	-13.3429	73.3119	-42.0852	110.051	25.7166	106.538	30.526	70.2338	-19.1259	27.8233	-52.9438	92.0602	73.0434	5.83537	-55.7534	89.6851	9.9463	26.1261	-56.875	27.3	-182	161.525	-252.525	91	33.2446	39.1641	19.2806	-7.74182	-91.4869	77.0997	17.9293	53.1736
301	46.2462	49.6496	-56.7271	21.6102	1.83593	82.6053	91.2502	75.5823	-58.2923	66.182	7.13212	120.425	-106.213	29.2292	-12.9106	72.8796	-41.2207	109.619	26.5811	106.108	30.526	70.2338	-20.4227	27.8233	-52.9438	92.4924	74.3402	4.53863	-54.8889	89.6851	9.58002	25.4163	-56.875	27.3	-182	161.525	-252.525	91	33.9453	39.3302	19.1054	-8.16042	-91.1501	76.5151	18.2933	52.755
302	46.4623	49.6496	-57.1594	21.8264	1.83593	82.173	92.1147	75.7985	-57.8601	66.6143	6.69987	120.209	-106.429	29.6614	-12.4784	72.6635	-41.653	109.619	27.4456	105.676	30.9582	70.0177	-21.0711	27.6071	-52.9438	92.9246	75.6369	3.24188	-54.0244	89.6851	10.0623	25.9236	-56.875	27.3	-182	161.525	-252.525	91	33.5881	40.1992	19.4035	-9.03857	-90.7748	76.6743	18.655	53.1781
303	46.4623	50.0819	-58.0239	22.2586	2.26817	81.7408	92.1147	74.5017	-57.4278	67.4788	4.97087	120.209	-106.429	30.0937	-12.0461	72.6635	-43.382	110.051	26.1489	105.676	31.8227	69.5854	-21.0711	27.1749	-52.9438	93.3569	76.0692	3.24188	-53.5922	89.6851	9.7643	26.1534	-56.875	27.3	-182	161.525	-252.525	91	34.0659	39.5258	19.2533	-9.14095	-91.157	76.6971	18.7483	54.1132
304	46.4623	50.5141	-58.8884	22.6908	2.70042	81.3085	92.1147	73.2049	-56.9956	68.3433	3.24187	120.209	-106.429	30.5259	-11.6139	72.6635	-45.111	110.483	24.8521	105.676	32.6872	69.1532	-21.0711	26.7449	-52.9438	93.7869	76.5014	3.24188	-53.1599	89.6851	10.5674	26.2603	-56.875	27.3	-182	161.525	-252.525	91	35.2352	39.4985	19.0964	-9.74382	-92.1739	77.2363	20.1087	53.7742
305	47.3268	51.8108	-58.8884	22.2586	2.70042	80.8762	90.818	74.5017	-58.7246	67.4788	4.10638	119.776	-105.997	30.9582	-10.3171	72.6635	-44.6787	110.051	24.4199	105.892	31.8227	68.2887	-20.6388	25.8804	-52.9438	94.2191	76.9337	3.24188	-52.9438	90.1173	10.9905	27.1885	-56.875	27.3	-182	161.525	-252.525	91	34.8621	39.6464	19.0645	-9.63463	-94.1327	77.3773	18.5526	53.8265
306	48.1913	53.1076	-58.8884	21.8264	2.70042	80.444	89.5213	75.7985	-60.4536	66.6143	4.97087	119.344	-105.567	31.3904	-9.02265	72.6635	-44.2465	109.619	24.8521	106.322	30.9582	67.4242	-20.2066	25.0159	-52.9438	94.6514	77.3659	3.24188	-52.9438	90.9795	10.6697	26.7586	-56.875	27.3	-182	161.525	-252.525	91	34.9963	40.5314	19.2579	-9.57548	-95.3657	78.194	19.2351	54.3611
307	48.8397	53.9721	-58.8884	22.2586	2.4843	80.6601	89.5213	76.2307	-61.1019	66.3981	6.0515	119.344	-105.567	32.0388	-8.5904	72.8796	-44.6787	109.402	25.2844	106.754	30.0937	67.2081	-19.9904	25.0159	-52.9438	95.0836	77.7982	3.24188	-52.9438	91.844	10.7744	27.7141	-56.875	27.3	-182	161.525	-252.525	91	34.6096	40.2743	19.5604	-10.308	-95.5341	77.8846	19.4353	53.9607
308	49.2697	54.4044	-58.8884	23.5553	2.05205	81.5246	90.818	75.7985	-60.6697	66.8304	7.34825	119.776	-105.997	32.9033	-9.02265	73.3119	-45.9755	109.402	25.7166	106.754	29.2292	67.6403	-19.9904	25.8804	-52.9438	95.5159	78.2304	1.94512	-53.3761	91.4118	10.1647	27.9893	-56.875	27.3	-182	161.525	-252.525	91	35.4149	40.6429	19.6401	-10.0145	-98.2641	77.7777	19.6856	54.5044
309	49.7019	54.8366	-58.8884	24.8521	1.6198	82.3891	92.1147	75.3662	-60.2374	67.2627	8.645	120.209	-106.429	33.7678	-9.4549	73.7441	-47.2722	109.402	26.1489	106.754	28.3647	68.0725	-19.9904	26.7449	-52.9438	95.9481	78.6627	0.648375	-53.8083	90.9795	10.5423	28.1349	-56.875	27.3	-182	161.525	-252.525	91	35.0259	40.743	20.0314	-10.8381	-100.095	76.5447	18.5754	55.7466
310	49.2697	54.8366	-58.4561	23.5553	2.4843	81.0924	92.547	74.9339	-58.9407	66.8304	8.21275	120.209	-106.861	33.3356	-9.02265	73.3119	-46.4077	108.97	25.9327	106.971	28.3647	68.0725	-19.5582	25.0159	-52.7277	95.732	79.0949	-0.8645	-54.4567	90.7634	10.5537	28.6059	-56.875	27.3	-182	161.525	-252.525	91	34.9804	40.1992	20.177	-11.325	-101.026	76.597	20.5705	54.6364
311	48.8397	54.8366	-58.0239	22.2586	3.3488	79.7956	92.9792	74.5017	-57.644	66.3981	7.7805	120.209	-107.294	32.9033	-8.5904	72.8796	-45.5432	108.538	25.0682	107.403	28.3647	68.0725	-19.1259	23.2869	-52.2954	94.8675	79.5272	-2.5935	-55.3212	90.7634	10.6516	28.2418	-56.875	27.3	-182	161.525	-252.525	91	34.0408	39.4053	20.2839	-11.896	-99.4721	76.7403	19.0736	55.3553
312	48.8397	54.8366	-58.0239	21.178	3.56493	79.3634	93.6276	74.7178	-56.7794	66.182	7.7805	119.993	-107.51	32.9033	-8.37428	72.8796	-45.3271	108.754	24.2037	107.835	28.7969	67.6403	-19.3421	22.6385	-51.8632	94.003	79.9594	-4.3225	-56.1857	90.7634	10.7244	29.0267	-56.875	27.3	-182	161.525	-252.525	91	33.9362	39.6601	20.5478	-11.9756	-97.6271	77.1362	19.5059	55.9354
313	49.2697	54.8366	-58.4561	20.3135	3.13267	79.7956	94.4921	75.5823	-56.3472	66.182	8.21275	119.56	-107.51	33.3356	-8.37428	73.3119	-45.7594	109.619	25.0682	107.403	29.6615	66.7758	-20.2066	23.0708	-52.2954	94.4352	80.8239	-3.89025	-55.3212	90.3334	10.5082	29.4612	-56.875	27.3	-182	161.525	-252.525	91	34.0476	39.0595	20.3817	-12.5125	-95.7661	76.8245	20.4068	56.2608
314	49.7019	54.8366	-58.8884	19.449	2.70042	80.2279	95.3566	76.4468	-55.915	66.182	8.645	119.128	-107.51	33.7678	-8.37428	73.7441	-46.1916	110.483	25.9327	106.971	30.526	65.9113	-21.0711	23.503	-52.7277	94.8675	81.6884	-3.458	-54.4567	89.9012	10.7266	29.5864	-56.875	27.3	-182	161.525	-252.525	91	35.0145	40.4085	20.0154	-12.9061	-95.6228	75.9531	20.1042	56.1993
315	50.5664	55.2689	-58.8884	20.3135	2.26817	80.2279	95.7889	76.0146	-55.4827	66.182	7.7805	119.128	-107.077	34.2001	-8.80653	72.8796	-47.0561	108.754	26.1489	106.322	30.0937	65.4791	-21.0711	23.0708	-52.9438	95.2997	82.3368	-3.458	-54.0244	90.5473	10.5901	29.6046	-56.875	27.3	-182	161.525	-252.525	91	34.6232	38.5885	20.6069	-12.0757	-96.9696	76.4673	20.4068	55.626
316	51.4309	55.7011	-58.8884	21.178	1.83593	80.2279	96.2211	75.5823	-55.0505	66.182	6.916	119.128	-106.645	34.6323	-9.23878	72.0151	-47.9206	107.025	25.7166	105.46	29.6615	65.0468	-21.0711	22.6385	-52.9438	95.732	82.7691	-3.89025	-54.0244	92.2763	10.1943	29.7593	-56.875	27.3	-182	161.525	-252.525	91	33.7678	38.9002	19.7948	-12.2099	-97.502	76.1283	19.7151	54.8821
317	51.2148	55.2689	-58.6722	21.8264	2.26817	79.7956	96.8695	75.1501	-55.2666	66.3981	6.48375	118.696	-106.429	34.8484	-9.4549	72.0151	-48.1367	106.161	25.2844	104.595	29.8776	64.3984	-21.2872	22.2063	-52.9438	96.1642	83.2013	-4.3225	-54.0244	94.0053	11.2886	29.4772	-56.875	27.3	-182	161.525	-252.525	91	34.2797	39.8375	19.7334	-11.5297	-99.0694	77.1089	20.2975	54.4954
318	49.918	53.9721	-58.24	22.2586	3.56493	78.9311	97.734	74.7178	-56.1311	66.8304	6.48375	117.831	-106.429	34.8484	-9.4549	72.8796	-47.7045	106.161	25.2844	105.46	30.7421	63.5339	-21.7194	21.774	-52.5116	94.8675	82.7691	-4.3225	-53.5922	93.1408	10.5469	29.9981	-56.875	27.3	-182	161.525	-252.525	91	35.6857	39.8398	18.9439	-11.8414	-99.3538	77.0952	20.9869	55.5305
319	48.6236	52.6753	-57.8077	22.6908	4.86167	78.0666	98.5985	74.2856	-56.9956	67.2627	6.48375	116.967	-106.429	34.8484	-9.4549	73.7441	-47.2722	106.161	25.2844	106.322	31.6066	62.6694	-22.1517	21.3418	-52.0793	93.573	82.3368	-4.3225	-53.1599	92.2763	9.98497	29.9686	-56.875	27.3	-182	161.525	-252.525	91	35.0759	38.9434	18.63	-11.3636	-99.2264	78.2077	20.6888	55.4167
320	48.6236	52.6753	-58.6722	21.8264	3.13267	79.3634	97.734	75.1501	-56.9956	67.2627	6.916	119.128	-105.997	35.7129	-9.4549	74.6086	-48.569	107.457	24.636	106.971	30.3098	63.9662	-21.7194	21.3418	-51.8632	93.573	82.7691	-4.97087	-53.1599	91.6279	10.399	30.2598	-56.875	27.3	-182	161.525	-252.525	91	34.9781	40.0172	18.0294	-11.9733	-99.6154	78.1303	19.2579	54.6523
321	48.6236	52.6753	-59.5367	20.9618	1.40367	80.6601	96.8695	76.0146	-56.9956	67.2627	7.34825	121.289	-105.567	36.5774	-9.4549	75.4731	-49.8657	108.754	23.3392	107.403	29.0131	65.2629	-21.2872	21.3418	-51.8632	94.8675	84.0658	-6.26535	-53.5922	91.1957	10.3057	30.0141	-59.15	25.025	-182	161.525	-252.525	91	34.0841	40.3426	17.1967	-11.168	-99.4129	78.8265	19.3216	55.4827
322	48.1913	52.6753	-59.969	20.5296	0.971425	80.6601	96.2211	75.7985	-56.5633	67.4788	7.34825	120.857	-105.135	37.0097	-9.88487	76.5538	-50.0819	108.754	22.0425	107.835	28.7969	65.4791	-21.0711	21.774	-51.8632	96.1642	85.3626	-7.5621	-54.0244	90.7634	9.87578	30.2575	-59.15	25.025	-182	161.525	-252.525	91	35.1328	40.3767	15.6725	-10.3171	-98.1776	77.6139	20.1793	54.7251
323	47.3268	52.6753	-59.969	20.5296	1.83593	79.3634	95.7889	74.5017	-55.6988	67.911	6.916	117.831	-104.702	37.0097	-10.7494	77.8505	-49.2174	107.457	23.7715	107.403	29.6615	64.6146	-21.0711	22.6385	-50.9987	96.1642	87.0915	-7.99435	-52.7277	90.7634	9.7552	30.1187	-59.15	25.025	-182	161.525	-252.525	91	34.4731	38.9389	13.4703	-9.10682	-95.4908	79.1882	19.1282	54.8184
324	46.4623	52.6753	-59.969	20.5296	2.70042	78.0666	95.3566	73.2049	-54.8343	68.3433	6.48375	114.806	-104.27	37.0097	-11.6139	79.1472	-48.3528	106.161	25.5005	106.971	30.526	63.75	-21.0711	23.503	-50.1342	96.1642	88.8206	-8.4266	-51.4309	90.7634	9.92355	30.6807	-59.15	25.025	-182	161.525	-252.525	91	35.1692	38.6227	11.9733	-8.02165	-95.7525	79.1359	19.2374	54.2724
325	46.8946	52.6753	-59.5367	20.9618	2.70042	78.4989	95.7889	74.0694	-53.9698	68.3433	7.7805	113.941	-104.27	37.0097	-12.0461	79.1472	-49.2174	106.161	26.365	107.619	31.3905	63.75	-19.7743	22.2063	-49.9181	95.5159	89.2505	-8.85885	-51.4309	90.7634	10.2966	31.2084	-59.15	25.025	-182	161.525	-252.525	91	34.0977	39.1937	11.2635	-7.53253	-95.3839	80.5327	19.5468	55.2438
326	47.3268	52.6753	-59.1045	21.3941	2.70042	78.9311	96.2211	74.9339	-53.1053	68.3433	9.07725	113.077	-104.27	37.0097	-12.4784	79.1472	-50.0819	106.161	26.365	109.348	32.255	63.75	-18.4776	20.9095	-50.3503	94.2191	88.3883	-9.2911	-52.7277	90.7634	10.2056	31.2198	-59.15	25.025	-179.725	161.525	-252.525	91	34.3502	38.8661	10.7152	-7.64627	-97.6089	81.9296	18.7483	54.666
327	47.7591	52.6753	-58.6722	21.178	2.91655	79.3634	96.005	74.9339	-52.6753	68.3433	9.72562	112.86	-104.486	37.2258	-12.4784	78.9311	-50.298	106.377	26.365	111.077	32.6872	63.3178	-18.6937	20.045	-50.7826	92.9246	87.5238	-9.72335	-54.0244	90.7634	7.20493	32.0388	-61.425	20.475	-179.725	161.525	-252.525	91	34.8553	40.1082	10.4354	-6.5702	-104.9	83.174	18.7346	55.278
328	48.1913	52.6753	-58.24	20.3135	3.3488	79.7956	95.1405	74.0694	-52.6753	68.3433	9.72562	113.293	-104.918	37.6581	-12.0461	78.4989	-49.8657	106.809	25.5005	110.212	32.6872	62.4533	-20.4227	19.6128	-51.2148	92.9246	88.3883	-9.72335	-52.7277	90.3334	6.44052	31.6248	-61.425	20.475	-179.725	161.525	-252.525	91	34.1819	39.6146	9.57548	-6.98425	-112.508	82.769	18.3047	54.5841
329	48.6236	52.6753	-57.8077	19.449	3.78105	80.2279	94.276	73.2049	-52.6753	68.3433	9.72562	113.725	-105.351	38.088	-11.6139	78.0666	-49.4335	107.241	24.636	109.348	32.6872	61.5888	-22.1517	19.1805	-51.6471	92.9246	89.2505	-9.72335	-51.4309	89.9012	6.29038	31.0901	-61.425	20.475	-179.725	161.525	-252.525	91	34.7802	39.2255	9.11137	-6.19255	-116.034	81.3039	18.1636	54.5977
330	48.1913	53.1076	-58.24	19.0167	2.91655	79.7956	95.1405	73.2049	-52.2431	68.7755	10.1579	112.428	-104.918	37.6581	-12.0461	79.3634	-49.0012	106.809	24.2037	109.132	32.6872	62.0211	-20.4227	19.1805	-51.6471	93.1408	89.6828	-10.1556	-51.4309	90.3334	6.21075	31.1834	-61.425	20.475	-179.725	161.525	-252.525	91	33.9862	38.3861	8.66092	-6.34725	-116.034	81.3039	16.9692	53.7742
331	47.7591	53.5399	-58.6722	18.5845	2.05205	79.3634	96.005	73.2049	-51.8108	69.2078	10.5901	111.131	-104.486	37.2258	-12.4784	80.6601	-48.569	106.377	24.2037	109.564	32.6872	62.4533	-18.6937	19.1805	-51.2148	93.573	89.6828	-11.0201	-52.7277	91.6279	6.48147	31.5975	-61.425	20.475	-179.725	161.525	-252.525	91	34.8553	39.0686	8.99535	-5.005	-116.034	81.3039	17.9862	54.1882
332	47.3268	53.3237	-58.6722	19.0167	1.83593	79.5795	96.005	73.2049	-51.1625	69.2078	10.5901	110.483	-104.054	37.6581	-12.6945	81.0924	-47.9206	105.728	24.2037	109.996	32.4711	62.6694	-18.0453	19.1805	-50.7826	94.003	89.6828	-11.8846	-54.0244	92.9247	6.88415	31.6816	-61.425	20.475	-179.725	161.525	-252.525	91	33.149	39.7602	8.41067	-3.822	-116.034	81.3039	17.6858	52.8073
333	46.8946	52.4592	-58.24	20.3135	2.26817	80.444	95.1405	73.2049	-50.298	68.7755	10.1579	110.483	-103.622	38.9525	-12.6945	80.6601	-47.0561	104.864	24.636	109.996	32.0388	62.6694	-18.4776	19.1805	-51.2148	94.003	90.5473	-12.3168	-53.1599	91.6279	6.2699	32.1253	-61.425	20.475	-179.725	161.525	-252.525	91	34.2251	39.3188	8.16952	-3.21457	-116.034	81.3039	17.0261	53.144
334	46.4623	51.5947	-57.8077	21.6102	2.70042	81.3085	94.276	73.2049	-49.4335	68.3433	9.72562	110.483	-103.189	40.2493	-12.6945	80.2279	-46.1916	103.999	25.0682	109.996	31.6066	62.6694	-18.9098	19.1805	-51.6471	94.003	91.4118	-12.7491	-52.2954	90.3334	6.734	31.6248	-61.425	20.475	-179.725	161.525	-252.525	91	34.2979	38.9048	7.4438	-1.89963	-116.034	83.579	16.9101	53.6331
335	45.5978	51.1625	-59.1045	21.178	1.40367	79.5795	95.5727	73.6372	-49.8657	68.7755	11.0224	110.483	-103.622	39.817	-12.6945	80.2279	-46.1916	104.432	25.2844	109.78	30.7421	62.6694	-18.9098	18.7483	-51.8632	93.7869	91.6279	-12.7491	-52.0793	90.1173	6.99563	31.3859	-61.425	20.475	-179.725	161.525	-254.8	91	34.4822	39.8876	6.66348	-0.220675	-116.034	83.579	17.8542	52.846
336	44.7333	50.7302	-60.4012	20.7457	0.106925	77.8528	96.8695	74.0694	-50.298	69.2078	12.3191	110.483	-104.054	39.3848	-12.6945	80.2279	-46.1916	104.864	25.2844	109.348	29.8776	62.6694	-18.9098	18.316	-51.8632	93.3569	91.1957	-12.3168	-52.5116	90.9795	6.69988	31.7271	-61.425	20.475	-179.725	161.525	-257.075	91	33.7587	40.363	6.42005	1.67212	-116.034	85.854	16.4574	53.8151
337	44.0849	50.5141	-60.4012	21.178	0.32305	76.9883	97.9501	74.2856	-50.0819	69.8561	13.1813	110.267	-104.27	39.3848	-12.2622	80.8763	-45.9755	104.864	25.2844	108.916	30.0937	62.4533	-19.1259	17.4515	-51.8632	92.9246	90.7634	-11.8846	-52.9438	91.844	7.38238	31.4359	-61.425	20.475	-179.725	161.525	-257.075	91	34.5277	39.3097	5.44635	2.87332	-116.034	85.854	16.2708	52.5775
338	43.6527	50.5141	-59.1045	22.4747	2.05205	76.9883	98.8146	74.2856	-49.2174	70.7206	13.6136	109.835	-104.27	39.817	-11.3978	82.173	-45.5432	104.432	24.8521	109.78	31.3905	62.0211	-19.5582	16.1548	-51.8632	93.3569	90.7634	-12.7491	-53.3761	91.4118	7.6804	31.3063	-61.425	20.475	-177.45	161.525	-257.075	91	33.9794	38.7387	4.6319	3.9767	-116.034	85.854	14.7966	52.3682
339	43.2204	50.5141	-57.8077	23.7715	3.78105	76.9883	99.6791	74.2856	-48.3528	71.5851	14.0459	109.402	-104.27	40.2493	-10.5332	83.4697	-45.111	103.999	24.4199	110.645	32.6872	61.5888	-19.9904	14.858	-51.8632	93.7869	90.7634	-13.6136	-53.8083	90.9795	7.49385	31.602	-61.425	20.475	-177.45	161.525	-257.075	91	34.5186	39.0504	4.16325	5.93093	-116.034	85.854	16.2276	51.9269
340	42.3559	49.2174	-58.24	22.0425	3.3488	76.9883	100.111	73.4211	-49.2174	72.0174	14.0459	108.97	-103.838	40.6815	-11.3978	83.902	-45.9755	104.432	23.9876	110.861	32.255	61.1566	-19.1259	14.4258	-52.2954	94.2191	91.4118	-14.262	-53.8083	90.9795	7.54163	31.2221	-61.425	25.025	-175.175	161.525	-257.075	91	33.7587	38.6159	3.48757	6.90462	-116.034	83.579	16.4141	50.6119
341	41.4914	47.9206	-58.6722	20.3135	2.91655	76.9883	100.541	72.5566	-50.0819	72.4496	14.0459	108.538	-103.406	41.1138	-12.2622	84.3342	-46.84	104.864	23.5554	110.429	31.8227	60.7243	-18.2614	13.9935	-53.1599	94.6514	92.7085	-14.6942	-53.3761	91.4118	7.55982	31.8068	-61.425	25.025	-175.175	161.525	-259.35	93.275	34.9668	39.9718	3.12585	7.81007	-116.034	85.854	15.3517	51.4764
342	41.0592	46.84	-58.6722	19.8812	2.4843	76.9883	99.463	72.1243	-50.5141	72.2335	13.3975	108.106	-103.406	41.1138	-12.6945	84.1181	-47.2722	104.648	23.1231	109.996	31.8227	61.1566	-18.0453	13.7774	-54.0244	95.0836	94.0053	-15.1265	-52.9438	91.844	6.85685	31.461	-61.425	25.025	-175.175	161.525	-259.35	93.275	33.7018	38.4953	2.6208	9.08862	-116.034	88.129	15.8954	50.9896
343	41.0592	45.9755	-58.24	20.7457	2.05205	76.9883	96.8695	72.1243	-50.5141	71.369	12.103	107.673	-103.838	40.6815	-12.6945	83.2536	-47.2722	103.783	23.5554	109.132	32.255	62.4533	-18.4776	13.7774	-53.5922	95.5159	92.7085	-15.1265	-52.9438	91.844	7.34825	31.2449	-61.425	25.025	-175.175	161.525	-259.35	97.825	35.2898	39.6214	2.71862	10.399	-116.034	90.404	14.7807	50.298
344	41.0592	45.1132	-57.8077	21.6102	1.6198	76.9883	94.276	72.1243	-50.5141	70.5045	10.8062	107.241	-104.27	40.2493	-12.6945	82.3891	-47.2722	102.919	23.9876	108.267	32.6872	63.75	-18.9098	13.7774	-53.1599	95.9481	91.4118	-15.1265	-52.9438	91.844	7.13668	31.734	-61.425	25.025	-175.175	161.525	-259.35	97.825	34.1637	39.0413	2.69588	12.7901	-116.034	90.404	15.3039	48.9057
345	41.0592	45.9755	-58.6722	22.0425	1.18755	76.556	96.8695	72.9888	-50.0819	71.369	11.6707	107.241	-103.838	40.6815	-12.2622	83.2536	-47.2722	104.215	23.9876	108.051	33.1195	63.75	-18.4776	13.3451	-52.9438	95.732	91.4118	-15.3426	-52.9438	92.0602	7.16397	31.4428	-61.425	25.025	-175.175	161.525	-259.35	97.825	35.6925	39.9809	2.26362	14.4895	-116.034	92.6789	14.7625	49.6178
346	41.0592	46.84	-59.5367	22.4747	0.7553	76.1238	99.463	73.8533	-49.6496	72.2335	12.5352	107.241	-103.406	41.1138	-11.83	84.1181	-47.2722	105.512	23.5554	108.483	33.5517	63.75	-18.0453	12.9129	-52.9438	94.8675	92.7085	-15.7748	-52.9438	92.4924	7.05022	31.7476	-61.425	25.025	-175.175	161.525	-259.35	97.825	34.3297	39.3939	2.37282	16.5324	-116.034	92.6789	16.0501	49.0945
347	40.8431	47.0561	-59.7529	22.2586	0.971425	75.6915	101.19	74.2856	-49.4335	72.6658	13.1813	107.673	-103.406	41.1138	-11.6139	84.5504	-47.2722	105.728	23.1231	108.916	33.7678	63.5339	-17.8292	12.9129	-52.9438	94.003	94.0053	-16.2071	-52.9438	92.9247	7.12985	31.4155	-61.425	25.025	-175.175	161.525	-259.35	100.1	34.6027	39.4599	2.24998	18.1545	-116.034	94.954	15.1538	47.4838
348	40.4108	46.6239	-59.3206	21.3941	1.83593	75.2593	102.054	74.2856	-49.4335	72.6658	13.6136	108.538	-103.838	40.6815	-11.6139	84.5504	-47.2722	104.864	23.5554	108.916	33.7678	63.1017	-17.8292	13.3451	-52.9438	94.8675	93.573	-16.2071	-52.9438	92.0602	7.27772	31.991	-61.425	25.025	-175.175	161.525	-259.35	100.1	34.0431	38.9184	2.27272	18.9439	-116.034	94.954	15.147	47.6294
349	39.9786	46.1916	-58.8884	20.5296	2.70042	74.827	102.919	74.2856	-49.4335	72.6658	14.0459	109.402	-104.27	40.2493	-11.6139	84.5504	-47.2722	103.999	23.9876	108.916	33.7678	62.6694	-17.8292	13.7774	-52.9438	95.732	93.1408	-16.2071	-52.9438	91.1957	7.23677	31.3859	-59.15	25.025	-175.175	161.525	-259.35	100.1	34.1227	38.6818	1.79042	19.9677	-116.034	94.954	15.1356	46.3463
350	39.5463	45.3294	-58.0239	22.2586	2.70042	75.2593	103.351	74.2856	-49.0012	71.8013	13.6136	109.835	-103.838	39.817	-12.9106	84.5504	-48.1367	103.567	23.9876	109.132	34.2001	63.5339	-18.6937	13.7774	-53.1599	96.3804	92.9246	-16.4232	-53.3761	91.6279	7.10028	30.8422	-59.15	25.025	-175.175	172.9	-259.35	100.1	33.4926	39.4212	1.50377	22.6772	-116.034	94.954	14.3007	45.4682
351	39.1141	44.4649	-57.1594	23.9876	2.70042	75.6915	103.783	74.2856	-48.569	70.9368	13.1813	110.267	-103.406	39.3848	-14.2074	84.5504	-49.0012	103.135	23.5554	109.564	34.6323	64.3984	-19.5582	13.7774	-53.5922	96.8126	92.9246	-16.8555	-54.2406	93.3569	7.6076	31.254	-56.875	25.025	-175.175	172.9	-259.35	100.1	34.6824	39.9149	1.8109	23.6805	-116.034	94.954	15.1105	45.823
352	39.1141	44.0326	-56.7271	24.2037	2.4843	75.6915	103.999	74.5017	-48.3528	71.369	12.7514	110.699	-103.622	39.3848	-14.4235	84.5504	-49.4335	102.703	23.1231	109.996	34.4162	64.6146	-19.7743	13.3451	-54.0244	97.2449	92.9246	-17.2877	-55.1051	95.0859	6.99335	30.6397	-56.875	22.75	-175.175	172.9	-259.35	100.1	33.5471	40.3926	1.74948	24.9249	-116.034	92.6789	14.99	44.8016
353	39.5463	44.0326	-56.7271	22.907	2.05205	75.2593	103.999	74.9339	-48.3528	73.098	12.3191	111.131	-104.486	39.817	-13.559	84.5504	-49.4335	102.27	23.9876	109.564	33.5517	64.1823	-19.3421	12.4806	-53.1599	97.6771	93.7891	-16.8555	-54.2406	94.2214	6.94102	31.1174	-56.875	22.75	-175.175	172.9	-259.35	100.1	33.2468	39.6646	0.8463	28.1941	-116.034	90.404	14.237	43.7824
354	39.9786	44.0326	-56.7271	21.6102	1.6198	74.827	103.999	75.3662	-48.3528	74.827	11.8869	111.564	-105.351	40.2493	-12.6945	84.5504	-49.4335	101.838	24.8521	109.132	32.6872	63.75	-18.9098	11.6161	-52.2954	98.1094	94.6536	-16.4232	-53.3761	93.3569	7.2982	31.6293	-56.875	22.75	-175.175	172.9	-257.075	100.1	33.8975	40.5155	0.2184	29.4385	-116.034	90.404	14.949	43.6754
355	39.9786	44.4649	-56.7271	22.907	2.91655	75.6915	101.838	75.3662	-48.7851	74.3948	13.1813	110.267	-105.351	40.2493	-12.6945	84.5504	-49.0012	102.27	24.8521	108.7	33.5517	63.3178	-19.3421	12.4806	-52.0793	98.1094	94.8698	-16.8555	-53.1599	92.7085	7.20265	31.1015	-56.875	22.75	-175.175	172.9	-257.075	100.1	33.5199	40.8249	0.389025	30.8831	-116.034	85.854	14.3029	42.3719
356	39.9786	44.8971	-56.7271	24.2037	4.2133	76.556	99.6791	75.3662	-49.2174	73.9625	14.4781	108.97	-105.351	40.2493	-12.6945	84.5504	-48.569	102.703	23.9876	108.267	34.4162	62.8856	-19.7743	13.3451	-52.5116	97.6771	94.4375	-18.1522	-53.5922	92.2763	7.0252	31.6634	-56.875	22.75	-175.175	172.9	-257.075	100.1	34.8052	40.4404	0.54145	33.5039	-116.034	88.129	14.8011	42.2581
357	39.9786	45.3294	-56.7271	24.2037	4.64555	76.556	99.463	75.3662	-49.6496	73.7464	15.5587	108.754	-105.567	40.4654	-13.1268	84.9826	-48.569	102.703	23.1231	107.835	35.4968	62.6694	-20.4227	13.5613	-52.9438	97.2449	94.0053	-19.449	-54.0244	91.844	7.27772	31.7476	-56.875	22.75	-175.175	172.9	-257.075	100.1	34.6141	41.5961	0.156975	35.0873	-116.034	90.404	14.2347	42.1489
358	39.9786	45.7616	-56.7271	22.907	4.2133	75.6915	101.19	75.3662	-50.0819	73.7464	16.4232	109.619	-105.997	40.8977	-13.9913	85.8471	-49.0012	102.27	24.4199	108.7	36.7936	62.6694	-21.2872	13.129	-52.9438	97.2449	94.8698	-19.449	-53.5922	92.2763			-56.875	22.75	-175.175	172.9	-257.075	100.1	33.3879	40.3835	0.76895	36.4432			14.0368	41.7849
359	39.9786	46.1916	-56.7271	21.6102	3.78105	74.827	102.919	75.3662	-50.5141	73.7464	17.2877	110.483	-106.429	41.3299	-14.8557	86.7116	-49.4335	101.838	25.7166	109.564	38.0903	62.6694	-22.1517	12.6968	-52.9438	97.2449	95.7343	-19.449	-53.1599	92.7085			-56.875	22.75	-175.175	172.9	-257.075	100.1	33.3993	40.6178	0.252525	36.7435			15.2516	42.0192
360	39.5463	45.3294	-57.1594	22.0425	3.3488	74.827	102.054	74.5017	-50.5141	75.0431	17.72	110.915	-105.997	40.8977	-14.4235	87.5761	-49.4335	102.27	25.5005	109.996	38.0903	62.6694	-20.8549	11.4	-52.7277	97.2449	95.9504	-19.2328	-52.7277	92.7085			-56.875	22.75	-175.175	172.9	-257.075	100.1	33.9498	40.5883	-0.32305	37.881			13.4134	40.925
361	39.1141	44.4649	-57.5916	22.4747	2.91655	74.827	101.19	73.6372	-50.5141	76.3399	18.1522	111.348	-105.567	40.4654	-13.9913	88.4384	-49.4335	102.703	23.7715	109.996	38.0903	62.6694	-19.5582	10.1033	-52.2954	97.2449	95.5181	-18.8006	-52.2954	92.2763			-56.875	22.75	-175.175	172.9	-257.075	100.1	33.4743	40.3813	-0.216125	38.2792			13.7342	42.6085
362	38.898	44.2487	-57.3755	23.3392	3.13267	74.827	100.328	73.6372	-50.0819	76.7721	18.3683	111.996	-105.567	40.4654	-13.7751	88.8706	-49.6496	103.135	22.0425	109.996	38.3064	62.4533	-19.3421	9.67102	-51.8632	97.2449	95.0859	-18.3683	-51.8632	91.844			-56.875	22.75	-175.175	172.9	-257.075	100.1	33.3447	40.6679	0.20475	39.5054			14.3507	40.5814
363	38.898	44.681	-56.511	24.636	3.99717	74.827	99.463	74.5017	-49.2174	76.3399	18.3683	112.86	-105.997	40.8977	-13.7751	88.8706	-50.0819	103.567	23.7715	109.996	38.7387	62.0211	-20.2066	10.1033	-51.8632	96.8126	94.2214	-19.2328	-51.4309	91.844			-56.875	22.75	-175.175	172.9	-257.075	100.1	33.0171	40.2061	0.52325	40.0286			13.1609	41.1456
364	38.898	45.1132	-55.6465	25.9327	4.86167	74.827	98.5985	75.3662	-48.3528	75.9076	18.3683	113.725	-106.429	41.3299	-13.7751	88.8706	-50.5141	103.999	25.5005	109.996	39.1709	61.5888	-21.0711	10.5355	-51.8632	96.3804	93.3569	-20.0973	-50.9987	91.844			-56.875	22.75	-175.175	172.9	-257.075	100.1	34.2274	41.5256	1.08062	40.2493			13.4089	41.562
365	38.4657	44.681	-55.6465	25.9327	4.42942	73.9625	99.0308	75.7985	-47.9206	76.3399	19.6651	113.293	-106.429	41.3299	-14.6396	88.4384	-50.5141	102.703	26.1489	109.564	39.1709	62.8856	-21.5033	10.1033	-51.4309	96.3804	93.1408	-20.5296	-50.3526	91.844			-56.875	22.75	-175.175	172.9	-257.075	100.1	33.8019	41.7599	1.6198	40.4632			13.1609	41.4004
366	38.0334	44.2487	-55.6465	25.9327	3.99717	73.098	99.463	76.2307	-47.4884	76.7721	20.9618	112.86	-106.429	41.3299	-15.5041	88.0084	-50.5141	101.406	25.7166	108.7	39.1709	64.1823	-21.9356	9.67102	-50.5664	96.8126	93.573	-20.5296	-49.4881	91.844			-56.875	22.75	-175.175	172.9	-257.075	100.1	33.7496	41.3481	1.8564	41.2207			13.7364	40.7225
367	37.8173	44.2487	-55.4304	26.365	3.99717	73.3141	99.6791	76.0146	-46.84	77.2044	22.2586	113.293	-106.213	41.1138	-15.5041	88.4384	-50.7302	101.406	25.2844	107.835	38.9548	64.8307	-22.1517	8.80652	-49.7019	97.2449	94.0053	-20.5296	-48.6236	91.844			-56.875	22.75	-175.175	172.9	-257.075	100.1	32.33	41.4869	2.40695	40.9796			12.7673	39.6373
368	37.8173	44.681	-54.9981	27.2295	4.42942	74.6109	99.6791	75.1501	-45.9755	77.6366	23.5553	114.589	-105.781	40.6815	-14.6396	89.7351	-51.1625	102.703	24.4199	107.835	38.5226	64.8307	-22.1517	7.50977	-50.5664	96.3804	94.4375	-21.3941	-49.9203	92.2763			-56.875	22.75	-175.175	172.9	-257.075	100.1	33.1786	41.5369	2.83237	41.6075			13.2155	39.7306
369	37.8173	45.1132	-54.5659	28.094	4.86167	75.9076	99.6791	74.2856	-45.111	78.0689	24.8521	115.886	-105.351	40.2493	-13.7751	91.0318	-51.5947	103.999	23.5554	107.835	38.0903	64.8307	-22.1517	6.21303	-51.4309	95.5159	94.8698	-22.2586	-51.2148	92.7085			-56.875	22.75	-175.175	172.9	-257.075	100.1	33.3151	41.132	2.37965	42.265			12.7991	39.3074
370	37.3851	44.681	-54.5659	27.2295	4.42942	75.0431	100.541	73.8533	-45.111	77.2044	24.4198	115.022	-106.213	40.6815	-13.3429	91.4641	-51.5947	103.135	22.907	107.835	38.9548	65.2629	-23.0139	5.78077	-51.8632	94.6514	95.5181	-22.4747	-51.6471	92.9247			-56.875	22.75	-175.175	172.9	-257.075	100.1	32.2072	41.0114	2.6117	42.0761			12.9539	39.7124
371	36.9528	44.2487	-54.5659	26.365	3.99717	74.1787	101.406	73.4211	-45.111	76.3399	23.9876	114.157	-107.077	41.1138	-12.9106	91.8963	-51.5947	102.27	22.4747	107.835	39.8193	65.6952	-23.8784	5.34852	-51.8632	93.7869	96.3826	-22.0425	-51.2148	92.9247			-56.875	22.75	-175.175	172.9	-257.075	100.1	31.4177	41.8054	3.13723	42.7017			14.1687	38.3156
372	36.5206	44.0326	-54.5659	25.9327	4.2133	74.1787	101.838	72.7727	-45.5432	75.6915	23.1231	113.509	-107.51	41.7622	-12.9106	91.8963	-51.3786	102.054	22.0425	107.835	40.0354	65.4791	-24.7429	5.1324	-51.8632	92.9246	97.2471	-21.6102	-50.7826	92.9247			-56.875	22.75	-175.175	172.9	-257.075	100.1	31.5634	40.3767	2.70725	42.3264			14.3143	38.7251
373	36.0883	44.0326	-54.5659	25.9327	5.0778	75.0431	101.838	71.9082	-46.4077	75.2593	21.8263	113.077	-107.51	42.6267	-13.3429	91.4641	-50.9464	102.486	21.6102	108.267	39.6032	64.6146	-25.6074	5.1324	-51.4309	93.7869	97.2471	-22.0425	-51.6471	92.0602			-56.875	22.75	-175.175	172.9	-257.075	100.1	32.0274	41.2344	2.10892	42.6927			13.8798	38.0585
374	35.6561	44.0326	-54.5659	25.9327	5.9423	75.9076	101.838	71.0437	-47.2722	74.827	20.5296	112.644	-107.51	43.4912	-13.7751	91.0318	-50.5141	102.919	21.178	108.7	39.1709	63.75	-26.4719	5.1324	-50.9987	94.6514	97.2471	-22.4747	-52.5116	91.1957			-56.875	22.75	-175.175	172.9	-257.075	100.1	32.5939	39.9535	1.49468	41.2981			14.5281	38.0812
375	35.2238	44.0326	-54.5659	25.5005	6.8068	75.0431	101.838	71.0437	-46.84	76.9883	21.3941	113.509	-107.077	43.0589	-12.9106	91.8963	-51.3786	103.351	20.9619	108.483	38.3064	62.8856	-26.0396	5.1324	-50.5664	95.2997	96.8149	-22.4747	-53.5922	90.9795			-56.875	22.75	-175.175	172.9	-257.075	100.1	33.0853	40.379	1.31723	42.0147			13.9708	38.154
376	34.7916	44.0326	-54.5659	25.0682	7.6713	74.1787	101.838	71.0437	-46.4077	79.1495	22.2586	114.373	-106.645	42.6267	-12.0461	92.7609	-52.2431	103.783	20.9619	107.619	37.442	62.0211	-25.6074	5.1324	-50.1342	95.732	95.9504	-22.0425	-54.8889	91.4118			-56.875	22.75	-175.175	172.9	-257.075	100.1	31.85	40.6997	-0.25935	41.9692			14.3166	38.6272
377	34.7916	44.4649	-54.3497	25.0682	7.23905	73.5303	101.838	71.2598	-45.7594	80.014	22.907	114.373	-106.861	42.1944	-11.83	92.977	-52.027	103.783	20.9619	106.754	37.6581	62.2372	-25.1752	4.91628	-49.7019	96.1642	95.0859	-21.6102	-56.1857	91.844			-56.875	22.75	-175.175	172.9	-257.075	100.1	31.7158	40.9841	-1.8837	42.3628			13.8912	38.4156
378	35.2238	45.3294	-53.9175	25.5005	5.51005	73.098	101.838	71.6921	-44.8948	79.5818	23.3392	113.509	-107.726	41.7622	-12.2622	92.5447	-50.7302	103.351	21.8264	107.187	38.9548	63.5339	-24.7429	4.48402	-50.9987	96.1642	95.0859	-20.3135	-55.3212	92.2763			-56.875	22.75	-175.175	172.9	-257.075	100.1	32.4369	41.6325	-3.61043	42.2308			13.857	37.7377
379	35.6561	46.1916	-53.4852	25.9327	3.78105	72.6658	101.838	72.1243	-44.0303	79.1495	23.7715	112.644	-108.59	41.3299	-12.6945	92.1125	-49.4335	102.919	22.6909	107.619	40.2493	64.8307	-24.3106	4.05178	-52.2954	96.1642	95.0859	-19.0167	-54.4567	92.7085			-56.875	22.75	-175.175	172.9	-257.075	100.1	32.6212	41.3003	-6.39502	41.6188			13.245	37.0757
380	35.6561	45.7616	-53.9175	25.0682	3.3488	73.5303	101.406	71.6921	-44.4626	79.5818	24.636	112.644	-107.294	42.6267	-13.1268	92.5447	-50.7302	103.783	22.907	107.619	39.8193	65.6952	-23.8784	3.6218	-52.9438	96.3804	95.302	-18.8006	-53.5922	93.1408			-56.875	22.75	-175.175	172.9	-254.8	100.1	32.5825	41.3185	-8.98625	41.2935			14.0936	37.3874
381	35.6561	45.3294	-54.3497	24.2037	2.91655	74.3948	100.974	71.2598	-44.8948	80.014	25.5005	112.644	-105.997	43.9234	-13.559	92.977	-52.027	104.648	22.4747	107.187	39.3871	66.5597	-23.4461	3.18955	-52.9438	96.8126	95.7343	-19.6651	-52.7277	93.573			-56.875	22.75	-175.175	172.9	-254.8	102.375	32.2504	42.0852	-11.1316	40.5996			13.4498	36.8709
382	35.8722	44.8971	-53.7014	25.0682	3.13267	74.827	101.19	71.6921	-45.5432	79.7979	25.7166	112.86	-105.351	44.1395	-13.559	92.977	-52.6754	104.648	22.0425	106.754	39.1709	67.2081	-23.8784	2.7573	-52.9438	97.2449	96.1665	-20.5296	-51.8632	94.0053			-56.875	22.75	-175.175	172.9	-254.8	102.375	31.4724	40.6611	-12.7241	39.9513			13.3497	36.7754
383	36.3044	44.4649	-51.9724	27.6617	3.99717	74.827	102.054	72.9888	-46.4077	78.9334	25.2844	113.293	-105.351	43.275	-13.1268	92.5447	-52.6754	103.783	21.178	107.187	39.1709	67.6403	-25.1752	2.32505	-53.3761	96.8126	96.5988	-20.0973	-52.7277	92.7085			-56.875	22.75	-175.175	172.9	-254.8	102.375	32.148	42.2285	-13.9207	39.2642			13.3019	37.4101
384	36.7367	44.0326	-50.2434	30.2552	4.86167	74.827	102.919	74.2856	-47.2722	78.0689	24.8521	113.725	-105.351	42.4105	-12.6945	92.1125	-52.6754	102.919	20.3135	107.619	39.1709	68.0725	-26.4719	1.8928	-53.8083	96.3804	97.031	-19.6651	-53.5922	91.4118			-56.875	22.75	-175.175	172.9	-254.8	102.375	31.2175	42.3741	-16.3368	38.4157			13.6659	37.9311
385	36.7367	44.8971	-51.9724	28.094	5.29392	73.5303	103.351	72.9888	-47.2722	78.9334	24.4198	113.293	-106.213	42.4105	-11.83	92.5447	-51.8109	103.351	20.0974	108.051	39.6032	68.937	-26.4719	1.0283	-53.8083	96.5965	96.8149	-19.2328	-54.2406	90.9795			-56.875	22.75	-175.175	172.9	-254.8	102.375	30.5714	41.6461	-17.9543	38.038			12.5717	39.1345
386	36.7367	45.7616	-53.7014	25.9327	5.72617	72.2335	103.783	71.6921	-47.2722	79.7979	23.9876	112.86	-107.077	42.4105	-10.9655	92.977	-50.9464	103.783	20.5296	108.483	40.0354	69.8015	-26.4719	0.1638	-53.3761	97.461	95.9504	-18.8006	-54.6728	91.4118			-56.875	22.75	-175.175	172.9	-254.8	102.375	31.9638	40.5428	-19.0554	36.582			12.31	38.1608
387	37.169	45.9755	-53.9175	25.5005	6.15842	71.5851	103.783	71.476	-47.2722	80.2301	23.9876	112.86	-107.726	42.1944	-10.5332	92.977	-50.298	103.783	20.9619	108.916	40.0354	70.4499	-25.8235	-0.26845	-52.9438	98.3255	95.0859	-18.3683	-55.1051	91.844			-56.875	22.75	-175.175	172.9	-254.8	102.375	32.2731	41.1343	-21.542	35.5514			11.4774	38.2314
388	38.0334	45.5455	-52.6207	26.7972	6.59068	71.5851	103.351	72.3405	-47.2722	80.2301	24.4198	113.293	-108.158	41.7622	-10.5332	92.5447	-49.8657	103.351	20.9619	108.483	39.6032	70.8799	-24.5268	-0.26845	-52.9438	97.461	95.5181	-19.6651	-54.6728	92.2763			-56.875	22.75	-175.175	172.9	-254.8	104.65	30.9901	41.0433	-23.9216	34.7825			11.3068	39.1391
389	38.898	45.1132	-51.324	28.094	7.02292	71.5851	102.919	73.2049	-47.2722	80.2301	24.8521	113.725	-108.59	41.3299	-10.5332	92.1125	-49.4335	102.919	20.9619	108.051	39.1709	71.3122	-23.23	-0.26845	-52.9438	96.5965	95.9504	-20.9618	-54.2406	92.7085			-56.875	22.75	-175.175	172.9	-254.8	104.65	31.5861	42.0329	-25.1433	34.5254			10.8631	39.3894
390	38.898	45.1132	-51.324	27.2295	7.02292	71.1529	104.648	73.2049	-47.2722	80.2301	24.8521	112.86	-108.158	41.3299	-10.5332	92.977	-49.0012	102.919	20.7457	108.051	40.0354	72.1766	-23.23	0.59605	-53.1599	96.1642	96.1665	-20.9618	-54.2406	92.7085			-56.875	22.75	-175.175	172.9	-254.8	104.65	30.6147	40.6429	-27.093	33.918			10.6766	38.8593
391	38.898	45.1132	-51.324	26.365	7.02292	70.7206	106.377	73.2049	-47.2722	80.2301	24.8521	111.996	-107.726	41.3299	-10.5332	93.8415	-48.569	102.919	20.3135	108.483	40.8977	73.0412	-23.23	1.46055	-53.5922	96.1642	96.1665	-19.6651	-54.6728	92.2763			-56.875	22.75	-175.175	172.9	-257.075	104.65	32.007	41.5301	-28.5444	34.9781			10.6106	39.6942
392	39.1141	45.3294	-51.324	26.1488	6.15842	70.7206	105.944	73.2049	-47.7045	80.2301	25.0682	111.996	-107.726	41.1138	-10.5332	93.8415	-47.9206	103.351	19.8812	108.916	41.3299	73.6895	-23.23	2.32505	-54.0244	96.1642	96.1665	-18.3683	-55.1051	91.844			-56.875	22.75	-175.175	172.9	-257.075	104.65	31.5952	42.7882	-30.5919	35.9222			9.9372	39.6487
393	39.5463	45.7616	-51.324	26.5811	4.42942	71.1529	103.351	73.2049	-48.569	80.2301	25.5005	112.86	-108.158	40.6815	-10.5332	92.977	-47.0561	104.215	20.7457	108.483	41.3299	74.1218	-23.23	3.18955	-54.0244	97.461	96.5988	-17.5038	-54.6728	92.7085			-56.875	22.75	-175.175	172.9	-257.075	104.65	30.8422	41.5961	-32.6644	37.1394			9.4094	39.2233
394	39.9786	46.1916	-51.324	27.0133	2.70042	71.5851	100.757	73.2049	-49.4335	80.2301	25.9327	113.725	-108.59	40.2493	-10.5332	92.1125	-46.1916	105.08			41.3299	74.554	-23.23	4.05178	-54.0244	98.7577	97.031	-16.6393	-54.2406	93.573			-56.875	22.75	-175.175	172.9	-257.075	104.65	31.759	41.8122	-35.126	38.038			8.7087	39.6168
395	39.9786	47.4883	-50.0273	27.0133	3.13267	71.1529	102.486	73.2049	-48.1367	81.0946	25.5005	111.996	-108.59	40.2493	-10.101	91.6802	-47.9206	104.648			41.3299	75.4185	-22.7978	2.7573	-54.2406	98.7577	97.031	-16.2071	-54.2406	93.573			-56.875	22.75	-175.175	172.9	-257.075	109.2	31.1834	41.926	-36.7413	38.9002			9.15005	39.2984
396	39.9786	48.7851	-48.7305	27.0133	3.56493	70.7206	104.215	73.2049	-46.84	81.9591	25.0682	110.267	-108.59	40.2493	-9.66875	91.248	-49.6496	104.215			41.3299	76.283	-22.3678	1.46055	-54.6728	97.461	96.5988	-16.2071	-54.6728	92.7085			-56.875	22.75	-175.175	172.9	-257.075	109.2	30.7398	42.0352	-39.1391	40.0172			9.27062	39.7306
397	39.9786	48.7851	-48.5144	26.5811	3.99717	70.9368	105.728	72.9888	-46.6239	81.9591	25.2844	109.619	-108.59	40.6815	-9.4549	91.248	-49.8657	103.999			41.1138	76.7153	-22.3678	1.24442	-55.1051	96.1642	96.1665	-16.2071	-55.1051	91.844			-56.875	22.75	-175.175	172.9	-257.075	109.2	31.3882	42.5971	-40.7498	41.2207			9.48902	39.8853
398	39.9786	47.4883	-49.3789	25.7166	4.42942	71.8013	107.025	72.5566	-47.4884	81.0946	26.1488	110.051	-108.59	41.546	-9.4549	91.6802	-48.569	103.999			40.6816	76.7153	-22.7978	2.10892	-53.8083	97.0287	96.1665	-15.7748	-54.6728	92.2763			-56.875	22.75	-175.175	172.9	-257.075	109.2	29.9936	41.6211	-43.862	42.7859			10.051	38.5794
399	39.9786	46.1916	-50.2434	24.8521	4.86167	72.6658	108.322	72.1243	-48.3528	80.2301	27.0133	110.483	-108.59	42.4105	-9.4549	92.1125	-47.2722	103.999			40.2493	76.7153	-23.23	2.97342	-52.5116	97.8932	96.1665	-15.3426	-54.2406	92.7085			-56.875	22.75	-175.175	172.9	-257.075	109.2	29.2838	41.0888	-45.8936	44.4853			10.0783	38.4361
400	40.8431	47.4883	-49.3789	26.1488	5.29392	72.2335	107.89	72.5566	-48.7851	80.6624	27.0133	108.754	-108.59	41.546	-9.02265	92.1125	-47.2722	104.432			41.5461	77.5798	-24.0945	3.40567	-51.8632	97.8932	96.5988	-15.5587	-54.2406	92.9247			-56.875	22.75	-175.175	172.9	-257.075	109.2	30.3644	41.314	-47.2017	45.3726			10.8927	38.1995
401	41.7076	48.7851	-48.5144	27.4456	5.72617	71.8013	107.457	72.9888	-49.2174	81.0946	27.0133	107.025	-108.59	40.6815	-8.5904	92.1125	-47.2722	104.864			42.8428	78.4443	-24.959	3.83565	-51.8632	97.0287	97.4633	-16.4232	-54.6728	92.9247			-56.875	22.75	-175.175	172.9	-257.075	109.2	29.3771	42.4356	-48.9353	45.6752			10.9268	37.6331
402	41.9237	49.4335	-48.2983	28.094	5.9423	71.8013	106.593	73.2049	-49.6496	81.5269	26.7972	107.241	-108.806	40.0332	-8.5904	92.1125	-47.7045	104.864			42.8428	79.0927	-25.3913	3.83565	-51.8632	96.1642	98.3278	-17.2877	-55.1051	92.9247			-56.875	22.75	-175.175	172.9	-257.075	109.2	31.0082	41.4642	-50.4959	45.9982			12.244	37.558
403	41.4914	49.4335	-48.7305	28.094	5.9423	72.2335	105.296	73.2049	-50.0819	81.9591	26.365	109.402	-109.239	39.6009	-9.02265	92.1125	-48.569	104.432			41.5461	79.5249	-25.3913	3.40567	-52.2954	95.732	98.3278	-16.8555	-54.6728	92.9247			-56.875	22.75	-175.175	172.9	-257.075	109.2	30.2529	41.6575	-51.8313	46.6648			13.0449	37.6308
404	41.0592	49.4335	-49.1627	28.094	5.9423	72.6658	103.999	73.2049	-50.5141	82.3891	25.9327	111.564	-109.671	39.1687	-9.4549	92.1125	-49.4335	103.999			40.2493	79.9572	-25.3913	2.97342	-52.7277	95.2997	98.3278	-16.4232	-54.2406	92.9247			-56.875	22.75	-175.175	172.9	-257.075	109.2	30.2871	41.0137	-53.9675	47.9775			12.3874	38.5567
405	41.9237	49.4335	-47.866	27.6617	5.51005	72.2335	103.567	73.6372	-49.6496	81.9591	25.9327	110.267	-109.671	40.0332	-8.5904	91.248	-48.569	104.432			41.1138	79.0927	-24.0945	3.40567	-52.9438	95.0836	98.3278	-16.4232	-54.4567	92.9247			-56.875	20.475	-175.175	172.9	-257.075	109.2	29.2747	42.8337	-55.5737	48.8829			13.8502	38.4316
406	42.7882	49.4335	-46.5693	27.2295	5.0778	71.8013	103.135	74.0694	-48.7851	81.5269	25.9327	108.97	-109.671	40.8977	-7.7259	90.3835	-47.7045	104.864			41.9783	78.2282	-22.7978	3.83565	-52.9438	95.0836	98.3278	-16.8555	-55.3212	92.9247			-56.875	20.475	-175.175	172.9	-257.075	109.2	30.1233	42.4742	-55.3894	49.7565			13.518	39.4212
407	43.2204	49.6496	-45.9209	27.2295	5.0778	71.369	103.783	74.0694	-48.7851	80.8785	26.1488	108.106	-109.455	41.3299	-7.29365	90.5996	-47.4883	105.296			42.1944	78.2282	-22.1517	3.83565	-52.9438	95.0836	98.3278	-17.2877	-56.1857	92.9247			-56.875	20.475	-175.175	172.9	-257.075	109.2	29.4476	43.2045	-56.3608	50.0022			14.6419	38.9707
408	43.2204	50.0819	-45.9209	27.6617	5.51005	70.9368	105.512	73.6372	-49.6496	80.014	26.5811	107.673	-109.023	41.3299	-7.29365	91.8963	-47.9206	105.728			41.7622	79.0927	-22.1517	3.40567	-52.9438	95.0836	98.3278	-16.4232	-55.7534	92.0602			-54.6	18.2	-175.175	172.9	-257.075	109.2	29.186	42.2468	-56.9842	50.2752			14.4735	39.2756
409	43.2204	50.5141	-45.9209	28.094	5.9423	70.5045	107.241	73.2049	-50.5141	79.1495	27.0133	107.241	-108.59	41.3299	-7.29365	93.1931	-48.3528	106.161			41.3299	79.9572	-22.1517	2.97342	-52.9438	95.0836	98.3278	-15.5587	-55.3212	91.1957			-54.6	18.2	-175.175	172.9	-257.075	109.2	29.2656	41.1047	-58.0807	50.7553			15.4268	39.4235
410	44.9495	51.3786	-45.0564	27.6617	5.9423	70.0723	106.377	73.6372	-51.3786	80.014	26.5811	107.673	-108.59	40.4654	-7.29365	92.7609	-47.0561	107.457			41.3299	80.8217	-23.0139	3.83565	-52.9438	95.2997	98.76	-15.3426	-55.1051	90.7634			-54.6	18.2	-175.175	172.9	-257.075	109.2	29.3111	41.7349	-57.9147	51.2603			15.4336	39.7966
411	46.6784	52.2431	-44.1919	27.2295	5.9423	69.64	105.512	74.0694	-52.2431	80.8785	26.1488	108.106	-108.59	39.6009	-7.29365	92.3286	-45.7594	108.754			41.3299	81.6861	-23.8784	4.70015	-52.9438	95.732	99.6245	-15.7748	-55.1051	90.7634			-54.6	18.2	-175.175	172.9	-257.075	109.2	29.6159	42.654	-58.7155	51.4946			15.1515	39.8899
412	47.3268	53.3237	-43.5435	27.2295	5.72617	69.64	104.864	73.6372	-52.4592	81.3108	25.5005	108.322	-108.59	39.6009	-6.8614	92.1125	-44.8949	108.97			41.5461	82.5507	-24.5268	5.1324	-52.9438	96.1642	100.489	-16.2071	-55.1051	90.7634			-54.6	18.2	-175.175	172.9	-257.075	109.2	29.7911	41.9396	-58.4561	51.8927			15.3494	39.0549
413	46.8946	54.6205	-43.1112	27.6617	5.29392	70.0723	104.432	72.3405	-52.027	81.3108	24.636	108.322	-108.59	40.4654	-5.9969	92.1125	-44.4626	108.106			41.9783	83.4152	-24.959	5.1324	-52.5116	96.1642	100.489	-15.7748	-54.6728	90.3334			-54.6	18.2	-175.175	172.9	-257.075	109.2	29.261	42.4287	-59.4048	52.598			15.7498	38.4429
414	46.4623	55.9172	-42.679	28.094	4.86167	70.5045	103.999	71.0437	-51.5947	81.3108	23.7715	108.322	-108.59	41.3299	-5.1324	92.1125	-44.0304	107.241			42.4106	84.2797	-25.3913	5.1324	-52.0793	96.1642	100.489	-15.3426	-54.2406	89.9012			-54.6	18.2	-175.175	172.9	-257.075	109.2	29.1541	41.5893	-58.7587	53.2259			16.1707	38.584
415	46.8946	55.485	-43.5435	28.094	4.42942	69.64	103.567	71.0437	-51.1625	81.743	22.907	107.89	-109.023	41.7622	-5.1324	91.6802	-45.3271	108.106			41.9783	85.5764	-24.959	5.56465	-52.0793	96.5965	100.705	-15.1265	-54.2406	90.7634			-54.6	18.2	-175.175	172.9	-257.075	109.2	28.0735	41.5506	-58.6017	52.6389			16.1297	38.9412
416	47.3268	55.0527	-44.408	28.094	3.99717	68.7755	103.135	71.0437	-50.7302	82.173	22.0425	107.457	-109.455	42.1944	-5.1324	91.248	-46.6239	108.97			41.5461	86.8732	-24.5268	5.9969	-52.5116	97.461	101.137	-15.1265	-54.6728	92.9247			-54.6	18.2	-175.175	172.9	-257.075	109.2	27.5844	41.2753	-58.3492	54.0244			15.8886	39.221
417	47.3268	54.8366	-44.1919	28.5262	4.2133	68.7755	102.27	71.2598	-51.3786	82.173	22.6908	107.241	-109.239	42.6267	-5.1324	90.8157	-46.1916	109.186			40.8977	87.5215	-24.5268	5.56465	-52.9438	98.3255	101.57	-15.1265	-55.1051	95.0859			-54.6	18.2	-175.175	172.9	-257.075	109.2	28.0439	42.9975	-59.1796	55.2052			15.8795	39.1573
418	46.8946	54.8366	-42.8951	29.3907	5.0778	69.64	100.974	71.6921	-53.1053	81.743	24.8521	107.241	-108.374	43.0589	-5.1324	90.3835	-44.0304	108.754			40.0354	87.5215	-24.959	4.2679	-52.9438	98.3255	101.57	-15.991	-54.6728	94.6537			-52.325	18.2	-175.175	172.9	-257.075	109.2	27.2386	42.6176	-58.8793	56.8886			16.0274	39.7556
419																																	-52.325	18.2	-175.175	172.9	-257.075	109.2	28.2009	42.1398	-58.9384	57.032			16.8623	40.6429

## Sheet: 3A (right)
	X_Cell 0	Y_Cell 0	X_Cell 1	Y_Cell 1	X_Cell 2	Y_Cell 2	X_Cell 3	Y_Cell 3	X_Cell 4	Y_Cell 4	X_Cell 5	Y_Cell 5	X_Cell 6	Y_Cell 6	X_Cell 7	Y_Cell 7	X_Cell 8	Y_Cell 8	X_Cell 9	Y_Cell 9	X_Cell 10	Y_Cell 10	X_Cell 11	Y_Cell 11	X_Cell 12	Y_Cell 12	X_Cell 13	Y_Cell 13	X_Cell 14	Y_Cell 14	X_Cell 15	Y_Cell 15	X_Cell 16	Y_Cell 16	X_Cell 17	Y_Cell 17	X_Cell 18	Y_Cell 18	X_Cell 19	Y_Cell 19	X_Cell 20	Y_Cell 20	X_Cell 21	Y_Cell 21	X_Cell 22	Y_Cell 22	X_Cell 23	Y_Cell 23	X_Cell 24
0	0	0	0	0	0	0	0	0	0	0	0	0	0	0	0	0	0	0	0	0	0	0	0	0	0	0	0	0	0	0	0	0	0	0	0	0	0	0	0	0	0	0	0	0	0	0	0	0	0
1	-0.465	-0.128	-0.187	-0.005	-0.132	-0.266	-0.09	0.245	-0.124	-0.178	-0.208	0.341	-0.385	-0.045	-2.012	0.271	-0.217	-0.087	-0.06	0.345	0.161	0.091	-0.081	0.045	-0.061	-0.078	-0.252	0.547	0.173	0.181	-0.15	0.477	-0.267	-0.138	-0.19	0.219	-0.568	-0.018	0.566	0.657	-0.032	0.003	-1.211	0.033	-1.393	0.179	-0.171	0.057	-0.439
2	0.041	-1.26	0.035	0.304	-0.239	-0.262	-0.428	0.335	0.018	-0.274	-0.002	0.059	-0.541	-0.295	-1.616	-0.108	-0.092	-0.338	0.066	0.351	0.746	-0.017	0.249	0.274	0.612	-0.711	-0.239	-0.271	0.513	-0.063	0.235	0.54	0.107	-0.072	0.693	0.343	-1.059	-0.21	1.282	0.293	0.658	-0.281	-0.776	-0.102	-1.943	0.263	0.224	-0.258	-0.271
3	-0.744	-2.036	-0.379	0.13	-0.573	-0.296	-0.938	0.439	-0.517	-0.443	-0.267	0.555	-0.934	-0.158	-2.472	-0.092	-0.806	-0.417	-0.285	0.558	0.958	-0.064	-0.114	0.228	0.262	-0.938	-1.564	-1.102	0.102	-0.062	-0.015	0.524	-0.366	0.404	0.278	0.163	-1.746	-0.368	1.496	0.518	0.349	0.018	-1.395	-0.214	-2.45	0.02	-0.401	0.036	-0.719
4	0.054	-1.942	0.165	-0.174	-0.47	-0.16	-0.705	0.686	-0.118	-0.629	0.16	0.702	-0.251	0.04	-2.533	0.109	-0.39	-0.53	0.08	0.588	1.442	0.173	0.422	0.512	0.571	-0.977	-1.124	-1.058	0.389	0.017	0.615	0.667	0.43	0.621	1.031	0.364	-1.447	-0.117	1.834	0.374	0.773	0.419	-0.976	-0.028	-2.757	0.14	0.255	0.063	0.215
5	1.33	-2.733	0.75	-0.287	-0.258	-0.484	0.314	0.534	0.609	-0.783	0.695	0.933	1.041	0.036	-1.816	0.168	0.347	-0.426	0.698	0.874	2.199	-0.305	1.318	0.584	1.104	-1.189	-0.598	-1.44	1.185	-0.132	1.241	0.597	0.914	0.379	1.836	0.314	-0.58	0.202	2.472	0.34	1.697	-0.308	-0.193	-0.174	-1.312	-0.097	1.092	0.137	0.686
6	-0.474	-3.232	-0.565	-0.283	-1.705	-0.624	-0.992	0.79	-1.069	-1.044	-0.215	1.435	-0.427	-0.273	-3.027	-0.125	-0.992	-0.457	-0.624	0.751	0.942	-0.266	-0.244	0.552	-0.318	-1.389	-1.696	-1.209	-0.22	-0.049	-0.165	0.684	-0.185	0.433	0.389	0.299	-2.056	0.088	2.045	0.513	0.427	0.169	-1.631	-0.159	-2.749	-0.2	-0.325	0.513	-0.534
7	-0.218	-3.556	0.15	-0.678	-1.534	-0.493	-0.843	0.703	-0.93	-1.437	1.417	2.118	-0.062	-0.631	-2.489	-0.043	-0.489	-0.669	0.093	0.747	1.542	-0.721	0.522	0.783	0.217	-1.79	-0.72	-0.807	0.674	0.041	0.745	0.782	0.501	0.507	0.982	0.215	-1.491	-0.293	2.786	0.518	0.902	0.169	-1.142	-0.091	-2.252	-0.228	0.324	0.415	0.071
8	-1.021	-4.047	-0.761	-0.644	-2.205	-0.8	-1.851	0.419	-1.702	-1.745	1.157	2.539	-0.531	-0.541	-3.127	0.018	-1.382	-0.732	-0.731	0.735	0.58	-0.732	-0.47	0.92	-0.686	-2.018	-1.327	-0.48	-0.097	-0.114	0.026	0.876	-0.388	1.131	0.627	0.065	-2.496	-0.309	2.701	0.888	0.217	0.188	-2.005	-0.232	-3.914	-0.042	-0.562	0.5	-0.634
9	-2.181	-4.791	-0.831	-0.513	-2.135	-0.889	-1.626	0.591	-2.322	-1.757	1.21	2.754	-1.35	-0.772	-4.089	0.287	-1.636	-0.809	-0.948	0.948	0.648	-0.576	-0.516	0.976	-0.643	-2.053	-1.558	-0.501	-0.286	-0.17	0.006	1.123	0.665	1.096	0.644	0.306	-2.953	0.382	3.434	1.121	-0.014	0.749	-1.834	0.215	-3.907	0.01	-0.524	0.573	-0.821
10	-2.119	-5.528	-0.699	-0.619	-2.427	-0.944	-1.455	0.457	-2.273	-2.181	1.978	3.191	-0.912	-0.609	-3.842	0.202	-1.776	-0.855	-0.96	1.018	0.705	-1.058	-0.679	0.677	-0.762	-2.22	-1.409	-0.528	-0.255	-0.243	0.034	1.333	1.183	0.911	0.691	0.287	-3.755	1.046	3.217	0.829	-0.119	1.009	-1.713	0.199	-4.106	0.127	-0.634	0.768	-0.739
11	-1.856	-5.405	-0.55	-0.607	-2.251	-1.366	-1.46	0.645	-2.173	-2.4	3.051	3.024	-0.025	-0.331	-3.554	-0.054	-1.668	-0.799	-0.612	0.909	1.115	-1.356	-0.199	1.001	-0.329	-2.239	-0.595	0.373	0.2	-0.046	0.265	1.275	2.915	0.609	1.056	0.221	-3.196	1.088	3.66	1.116	0.375	0.444	-1.471	0.125	-3.097	0.108	-0.167	0.918	-0.454
12	-1.575	-6.23	-0.257	-0.665	-2.867	-1.693	-0.994	0.93	-1.641	-2.66	3.646	3.36	0.446	-0.117	-3.005	-0.036	-1.26	-0.832	-0.209	0.955	1.522	-1.861	0.195	0.984	-0.354	-2.316	-0.354	0.287	0.454	0.031	0.533	1.252	2.483	0.759	1.169	0.406	-3.347	0.853	4.484	0.977	0.756	0.94	-1.658	0.266	-2.131	-0.163	-0.077	1.114	-0.217
13	-1.252	-6.617	0.06	-0.886	-2.438	-1.764	-0.709	0.867	-1.423	-2.848	4.627	3.817	0.898	-0.074	-1.893	-0.072	-0.895	-0.76	0.129	0.725	2.018	-1.953	0.924	1.455	0.204	-2.485	-0.222	0.745	1.06	-0.014	1.157	1.058	2.502	0.603	1.867	0.343	-2.834	0.49	5.369	1.14	1.177	0.837	-1.01	0.249	-2.4	-0.021	0.174	1.193	0.298
14	-1.587	-6.747	-0.315	-0.766	-2.784	-2.059	-1.093	0.728	-1.884	-3.352	4.417	4.24	0.646	-0.348	-2.748	-0.139	-1.053	-0.816	-0.235	0.523	1.889	-2.517	0.075	0.87	-0.025	-2.865	-0.233	0.876	0.715	-0.074	1.063	1.096	1.92	0.521	1.651	0.518	-3.475	0.533	5.598	1.221	0.89	1.078	-1.465	0.145	-2.569	-0.078	-0.076	1.089	-0.022
15	-1.263	-7.019	-0.344	-1.265	-3.268	-2.223	-1.205	0.955	-2.375	-3.562	4.715	4.896	0.137	-0.467	-2.355	-0.341	-1.107	-0.881	-0.448	0.401	1.726	-2.667	0.501	1.228	-0.273	-3.218	0.571	1.228	0.754	-0.219	1.128	1.054	3.063	0.61	1.539	0.362	-3.027	0.571	6.358	1.309	1.081	0.269	-1.873	-0.078	-2.487	-0.17	0.001	0.885	-0.065
16	-2.096	-6.886	-1.086	-1.028	-4.586	-2.005	-2.129	0.838	-3.498	-3.743	4.268	5.549	-0.531	-0.588	-3.626	-0.615	-2.058	-0.907	-1.012	0.643	1.347	-2.78	-0.291	1.183	-1.049	-3.162	-0.52	0.694	0.218	0.173	0.485	0.997	1.303	0.94	0.888	0.457	-3.344	0.735	6.146	1.538	0.171	0.206	-2.645	0.085	-3.027	-0.081	-0.79	1.091	-0.984
17	-1.12	-7.106	-0.138	-0.714	-4.204	-1.561	-1.094	0.745	-2.984	-3.796	4.939	6.212	0.219	-0.444	-2.355	-0.299	-1.174	-0.629	-0.403	0.663	2.058	-2.747	0.91	1.731	-0.365	-2.902	0.339	0.963	1.345	0.175	1.198	1.091	1.661	0.816	2.15	0.876	-2.497	0.573	6.851	1.646	1.254	0.831	-2.267	0.343	-1.798	-0.046	0.162	1.406	-0.058
18	-0.034	-7.241	0.298	-0.823	-4.362	-1.721	-1.056	0.717	-2.868	-3.942	5.363	6.19	0.947	-0.281	-2.414	-0.42	-0.953	-0.851	-0.014	0.462	2.68	-2.976	1.331	2.072	-0.119	-3.273	0.664	0.397	1.637	0.105	1.657	0.963	1.988	0.391	2.648	0.731	-1.981	0.195	7.273	1.454	1.362	1.274	-1.767	0.262	-2.435	0.089	0.334	1.319	0.302
19	-1.125	-7.632	-0.64	-0.971	-5.253	-1.405	-1.89	0.973	-4.097	-3.847	4.315	6.713	-0.12	-0.286	-3.709	-0.031	-2.046	-0.601	-1.226	0.547	2.013	-3.039	0.137	2.282	-1.01	-3.029	-0.797	0.196	0.391	0.253	0.542	0.692	0.564	1.052	1.845	1.083	-3.004	0.394	6.287	1.704	0.178	1.552	-2.809	0.609	-3.446	0.339	-0.77	1.471	-0.806
20	-0.248	-7.622	-0.164	-1.152	-4.668	-2.023	-0.845	0.712	-3.611	-4.271	5.185	6.623	0.31	-0.407	-3.182	-0.071	-1.497	-0.883	-0.713	0.301	2.638	-3.367	0.968	2.771	-0.84	-3.452	0.185	0.798	1.357	0.144	1.107	0.534	1.967	1.295	2.31	1.034	-2.44	0.187	6.779	1.751	0.868	0.804	-2.604	0.334	-3.663	0.378	-0.363	1.671	-0.329
21	-0.208	-8.057	-0.115	-1.299	-4.716	-1.684	-1.2	0.692	-3.647	-4.261	5.603	6.419	0.364	-0.302	-4.167	0.292	-1.428	-0.998	-0.709	0.231	2.973	-3.443	1.121	2.792	-0.3	-3.3	1.072	1.654	1.281	0.276	1.059	0.57	2.862	1.153	2.291	1.232	-2.172	0.591	7.229	1.931	0.967	1.582	-1.562	0.657	-4.3	0.402	-0.266	1.848	-0.226
22	0.395	-8.468	-0.255	-1.595	-6.04	-1.705	-0.942	0.519	-3.949	-4.535	5.678	6.347	0.371	-0.57	-4.988	0.281	-1.64	-1.188	-0.881	-0.047	3.002	-3.389	0.977	2.758	-0.57	-3.739	0.925	1.749	1.324	0.107	0.949	0.329	3.222	1.711	2.419	1.31	-2.584	1.031	6.577	1.796	0.835	1.488	-1.633	0.512	-4.43	0.38	-0.252	1.79	-0.469
23	-0.209	-9.269	-0.342	-1.764	-6.537	-2.079	-1.024	0.545	-4.197	-5.114	5.719	5.968	-0.325	-0.859	-5.206	0.078	-1.887	-1.53	-1.097	-0.26	3.077	-3.761	1.201	3.182	-0.568	-3.87	1.39	1.919	0.892	-0.229	0.649	0.172	2.347	1.641	2.303	1.162	-2.781	0.909	6.841	1.483	0.708	0.987	-1.987	0.403	-4.686	0.254	-0.367	1.579	-0.579
24	-0.16	-9.458	-0.933	-1.53	-7.948	-1.93	-1.429	0.713	-4.859	-5.308	5.672	5.539	-1.658	-0.803	-5.943	0.348	-2.456	-1.499	-1.485	-0.326	2.821	-3.562	0.616	3.286	-1.16	-3.824	0.229	1.442	0.648	0.061	0.419	0.212	1.595	1.674	1.822	1.316	-3.401	0.785	6.711	1.553	0.325	1.628	-2.3	0.516	-5.302	0.174	-0.952	1.87	-1.352
25	0.05	-9.813	-0.677	-1.973	-7.956	-2.35	-1.157	0.542	-4.62	-5.772	6.099	5.29	-0.843	-0.87	-4.252	-0.302	-2.083	-1.56	-1.203	-0.26	3.559	-3.885	1.065	3.733	-0.794	-3.883	-0.552	0.361	1.169	-0.12	0.911	0.078	2.516	1.741	2.535	1.166	-3.34	0.983	7.423	1.59	0.595	1.154	-2.552	0.204	-4.373	-0.047	-0.611	1.814	-0.734
26	0.161	-9.798	-0.37	-1.755	-8.033	-2.557	-0.554	0.751	-4.446	-5.878	6.748	4.89	-0.294	-0.572	-4.343	0.02	-1.728	-1.516	-0.991	-0.222	4.047	-3.648	1.391	3.72	-0.59	-3.847	-1.577	-0.612	1.411	0.013	1.489	0.429	2.001	2.131	2.973	1.461	-3.148	1.117	8.112	1.64	1.104	0.964	-2.027	0.738	-2.892	-0.299	-0.271	1.92	-0.513
27	0.21	-10.413	-0.632	-1.968	-8.583	-3.052	-0.9	0.809	-5.296	-6.153	6.679	4.539	-0.318	-0.782	-4.306	-0.351	-2.377	-1.73	-1.134	-0.746	3.796	-3.732	1.387	3.971	-0.589	-4.227	-2.022	-0.521	1.125	-0.036	1.111	0.141	2.222	1.782	2.427	1.325	-3.237	0.893	7.788	1.365	0.717	0.993	-2.599	0.209	-3.373	-0.234	-0.778	1.901	-0.624
28	0.53	-10.955	-0.804	-1.76	-8.852	-3.275	-0.625	0.672	-5.534	-6.17	6.927	4.59	-0.144	-0.812	-4.757	-0.365	-2.415	-1.609	-1.163	-0.712	4.057	-3.469	1.346	4.351	-0.652	-4.197	-2	-0.597	1.181	0.078	0.989	0.484	3.048	1.814	2.164	1.571	-3.507	1.181	7.461	1.546	0.754	0.578	-2.029	0.468	-3.941	-0.101	-0.888	2.274	-0.782
29	0.968	-10.913	-0.907	-1.804	-9.264	-3.318	-1.158	0.771	-5.759	-6.303	7.124	4.448	-0.146	-0.843	-4.505	-0.292	-2.412	-1.664	-1.307	-0.61	4.223	-3.45	1.074	4.223	-0.603	-4.272	-2.175	-0.724	1.255	0.282	0.627	0.396	2.339	1.485	2.386	1.665	-3.705	1.148	7.524	1.541	0.653	0.988	-2.199	0.334	-3.936	-0.03	-1.089	2.607	-0.859
30	1.189	-12.079	-0.585	-2.3	-9.566	-3.933	-0.993	0.46	-5.213	-6.665	7.799	4.273	0.43	-1.096	-3.911	-0.439	-2.069	-1.944	-0.996	-0.805	4.752	-3.794	1.626	4.129	-0.021	-4.858	-1.545	-0.872	1.318	-0.049	1.368	0.262	3.517	1.357	3.141	1.213	-3.258	0.811	8.173	1.27	0.994	0.786	-1.673	0.169	-3.407	-0.38	-0.672	2.476	-0.69
31	0.422	-12.391	-0.788	-2.407	-13.767	-4.983	-0.989	0.398	-5.51	-6.958	7.596	4.016	0.628	-1.286	-3.668	-0.849	-2.283	-1.874	-1.079	-0.916	4.892	-4	1.634	4.773	-0.15	-4.707	-0.086	0.387	1.053	-0.164	1.188	0.289	4.426	0.697	3.087	1.267	-3.616	0.964	8.008	1.18	0.826	1.311	-2.384	-0.161	-3.876	-0.218	-0.971	2.643	-0.948
32	1.64	-12.528	-0.987	-2.444	-15.354	-5.585	-1.106	0.199	-5.647	-7.316	7.484	3.851	0.617	-1.576	-4.432	-0.446	-2.299	-1.847	-1.137	-0.946	4.825	-4.379	1.694	4.855	-0.326	-5.012	-0.984	-0.574	1.097	-0.08	1.06	0.421	4.505	1.067	3.105	1.309	-3.352	1.122	8.511	1.569	0.845	1.706	-2.754	-0.167	-3.837	-0.118	-1.009	3.178	-0.948
33	0.982	-12.919	-1.19	-2.648	-14.646	-5.079	-1.415	0.184	-6.515	-7.362	7.089	3.661	0.341	-1.487	-5.036	-0.413	-2.499	-1.821	-1.462	-1.147	5.01	-4.476	1.579	5.19	-0.717	-5.155	-0.796	0.232	0.94	-0.089	0.93	0.367	4.328	1.212	2.473	1.45	-3.783	1.29	8.046	1.506	0.612	1.415	-3.002	-0.254	-4.443	-0.333	-1.431	3.406	-1.229
34	1.606	-13.844	-0.61	-2.282	-11.832	-4.817	-0.564	0.18	-5.382	-7.707	8.064	3.809	1.034	-1.594	-3.699	-0.649	-1.825	-1.777	-0.606	-1.064	5.895	-4.367	2.201	5.261	-0.2	-5.269	0.856	0.926	1.628	-0.004	1.634	0.679	4.862	1.057	3.285	1.478	-3.058	1.442	9.439	1.747	1.328	1.424	-2.398	-0.575	-3.701	-0.287	-0.488	3.368	-0.548
35	1.755	-14.031	-0.499	-1.894	-11.489	-5.106	-0.611	0.17	-5.678	-7.658	8.234	3.857	1.154	-1.464	-3.674	-0.573	-1.833	-1.83	-0.51	-1.033	6.163	-4.598	2.088	5.142	-0.023	-5.278	0.857	0.716	1.862	0.093	1.853	0.785	4.455	1.17	3.518	1.769	-2.559	1.765	8.812	1.582	1.433	1.445	-2.435	-0.321	-3.969	-0.05	-0.628	3.718	-0.474
36	1.254	-14.557	-0.951	-2.171	-10.604	-4.622	-1.171	-0.127	-6.423	-7.947	8.61	3.412	0.732	-1.605	-5.212	-0.55	-2.241	-1.831	-0.95	-1.356	5.921	-5.009	1.955	5.581	-0.379	-5.651	-0.069	0.027	1.543	-0.116	1.34	0.937	3.953	1.516	3.035	1.68	-2.763	1.495	8.96	1.352	1.02	1.601	-2.952	-0.342	-4.623	-0.05	-1.109	3.739	-0.715
37	1.741	-14.351	-0.992	-2.064	-9.307	-4.67	-1.272	-0.052	-6.119	-7.824	9.36	2.976	0.784	-1.197	-5.526	-0.46	-2.295	-1.76	-1.069	-0.984	6.15	-5.301	1.796	5.324	-0.335	-5.449	0.076	0.394	1.703	-0.057	1.356	1.302	3.46	1.629	3.172	1.874	-2.515	1.837	9.638	1.61	0.985	1.685	-2.424	-0.031	-4.715	0.044	-1.028	4.074	-0.8
38	1.057	-14.344	-1.771	-2.086	-9.845	-5.365	-2.548	-0.121	-7.203	-7.693	9.105	2.748	-0.279	-1.435	-5.545	-0.527	-3.17	-1.794	-2.005	-0.862	5.345	-5.768	1.225	5.925	-1.233	-5.415	-1.455	-0.342	0.926	0.244	0.626	1.476	2.839	1.458	2.569	2.03	-1.961	1.916	8.017	1.728	-0.193	1.838	-3.575	-0.202	-5.46	-0.11	-2.018	4.173	-1.656
39	1.677	-14.274	-1.537	-2.452	-9.658	-5.881	-2.651	-0.361	-7.612	-7.818	10.277	2.683	0.066	-1.534	-4.756	-0.906	-3.072	-1.856	-1.792	-1.164	5.797	-6.368	1.693	6.443	-1.044	-5.711	-1.396	-0.178	0.646	0.061	0.798	1.439	3.51	1.311	2.505	1.859	-1.322	1.791	9.075	1.878	0.084	1.936	-2.885	-0.405	-5.232	-0.325	-1.877	4.175	-1.431
40	2.032	-13.582	-1.015	-2.664	-7.728	-5.634	-1.876	-0.339	-6.672	-7.755	11.385	2.605	0.269	-1.83	-3.498	-1.277	-2.49	-1.806	-1.125	-1.167	6.813	-6.642	2.284	6.532	-0.262	-6.017	-0.355	0.131	1.47	0.15	1.614	1.59	2.828	1.524	3.126	1.971	-0.571	2.136	9.685	2.034	0.621	1.681	-2.529	-0.326	-5.116	-0.187	-1.431	4.711	-0.641
41	1.5	-12.904	-1.33	-2.635	-7.683	-5.86	-2.022	-0.691	-7.123	-7.843	12.079	2.765	0.293	-1.823	-3.925	-1.176	-2.698	-2.067	-1.261	-1.166	7.049	-7.026	2.277	6.726	-0.556	-6.249	-0.636	0.02	1.412	0.022	1.287	1.626	2.87	1.365	2.537	1.765	-0.796	1.993	9.93	1.874	0.567	1.556	-2.797	-0.424	-5.174	-0.147	-1.593	4.764	-0.779
42	0.165	-12.673	-1.643	-2.8	-7.683	-5.502	-2.195	-0.473	-7.114	-7.756	12.492	2.551	0.12	-1.637	-4.234	-0.886	-2.959	-2.185	-1.751	-1.337	7.159	-7.543	2.093	6.771	-0.742	-6.248	-0.784	-0.095	1.369	0.344	1.013	1.748	2.1	1.615	2.839	1.959	-0.743	2.039	10.305	2.212	0.258	1.712	-3.014	-0.472	-5.537	0	-1.872	5.039	-1.054
43	0.63	-11.903	-1.442	-2.709	-6.88	-6.06	-2.379	-0.22	-7.125	-7.643	13.466	2.813	0.572	-1.513	-5.832	-0.48	-2.941	-2.227	-1.463	-1.342	7.559	-7.782	2.569	7.304	-0.687	-6.098	0.148	0.658	1.793	0.195	1.134	1.533	2.463	1.574	3.065	2.057	-0.255	2.007	10.416	2.23	0.256	2.07	-2.807	-0.273	-4.92	-0.036	-1.748	5.221	-0.914
44	0.851	-11.867	-1.606	-3.023	-6.923	-6.894	-2.736	-0.525	-6.989	-7.755	13.864	2.731	0.296	-1.659	-6.861	-0.253	-3.109	-2.455	-1.558	-1.481	7.63	-8.21	2.32	7.069	-0.8	-6.218	0.494	1.01	1.469	0.309	0.816	1.286	2.448	1.144	3.331	2.17	0.255	2.436	11.245	2.276	0.066	1.896	-3.137	-0.484	-5.14	-0.057	-2.086	5.398	-1.099
45	0.85	-11.244	-1.071	-3.202	-5.72	-6.456	-2.219	-0.475	-6.999	-7.311	14.714	3.302	0.63	-1.54	-6.686	0.094	-2.723	-2.229	-1.215	-1.156	8.03	-8.173	2.547	6.917	-0.32	-6.167	1.097	1.304	1.886	0.49	1.538	1.166	2.792	1.539	3.7	2.433	0.973	3.131	11.636	2.639	0.565	2.284	-2.094	-0.188	-4.737	0.207	-1.422	5.834	-0.48
46	1.101	-11.004	-0.971	-3.593	-5.05	-6.868	-2.226	-0.767	-7.557	-7.601	15.049	3.599	0.891	-1.787	-6.767	-0.28	-2.608	-2.399	-1.272	-1.817	8.115	-8.815	2.8	7.497	-0.544	-6.396	0.682	0.793	1.923	0.324	1.52	1.047	2.187	1.492	4.106	2.144	1.087	3.063	11.56	2.325	0.645	2.498	-2.918	-0.756	-4.717	0.055	-1.494	5.661	-0.694
47	0.316	-10.506	-1.288	-3.674	-5.543	-6.994	-3.109	-0.819	-7.448	-7.867	15.019	3.619	0.894	-1.549	-6.447	-0.503	-3.151	-2.379	-1.685	-1.655	7.965	-9.076	2.269	7.548	-1.15	-6.478	0.346	1.07	1.413	0.283	0.923	0.804	2.32	1.422	3.727	2.386	1.018	3.447	10.695	2.266	0.062	2.116	-2.946	-0.371	-4.211	0.116	-2.241	5.779	-1.249
48	0.519	-10.857	-1.302	-4.062	-5.443	-7.226	-2.612	-1.112	-7.606	-8.118	15.518	3.945	0.956	-1.925	-6.437	-0.842	-3.011	-2.583	-1.538	-1.89	7.992	-9.664	2.536	7.664	-1.127	-6.83	1.735	2.537	1.704	-0.083	1.157	0.53	1.997	1.29	3.709	2.369	0.94	3.186	11.104	2.231	0.03	1.657	-2.974	-0.831	-4.562	-0.171	-2.291	5.736	-1.234
49	0.275	-10.109	-1.31	-3.719	-5.42	-6.989	-3.548	-0.815	-7.523	-7.66	15.256	4.153	1.318	-1.473	-5.952	-0.503	-3.193	-2.558	-1.586	-1.428	8.194	-9.361	2.206	7.256	-1.253	-7.021	2.571	3.338	1.637	0.125	0.979	0.778	0.74	1.932	3.643	2.651	1.038	3.089	10.771	2.341	0.117	1.961	-3.322	-0.508	-5.069	0.242	-2.639	6.265	-1.103
50	-0.175	-9.965	-1.462	-3.823	-5.128	-6.716	-3.474	-0.925	-7.395	-8.039	15.273	4.366	1.314	-1.48	-4.8	-0.92	-3.174	-2.498	-1.571	-1.643	8.506	-9.765	2.549	7.631	-1.374	-7.027	2.76	3.299	1.463	0.078	1.066	0.8	2.18	1.478	3.855	2.76	0.793	3.111	10.707	2.213	0.046	1.967	-2.673	-0.485	-5.044	0.018	-2.282	6.292	-1.176
51	-0.031	-9.508	-1.748	-3.973	-6.014	-6.763	-3.45	-0.989	-7.727	-7.778	14.94	4.622	1.022	-1.593	-6.388	-0.462	-3.471	-2.488	-1.783	-1.68	8.324	-9.572	1.975	7.332	-1.637	-7.147	2.837	3.57	1.734	0.533	1.277	0.7	1.617	1.936	3.841	3.083	0.061	3.507	10.817	2.272	-0.243	2.883	-3.341	-0.388	-6.053	0.383	-2.571	6.317	-1.322
52	0.663	-9.451	-0.578	-3.964	-4.347	-5.957	-2.406	-0.655	-6.384	-7.514	16.372	5.407	2.473	-1.447	-6.548	-0.13	-2.546	-2.484	-0.439	-1.33	9.502	-9.768	3.518	7.931	-0.36	-6.987	4.356	3.982	2.896	0.603	2.475	0.781	2.897	1.723	5.835	3.39	1.209	3.828	12.594	2.514	1.212	2.51	-1.835	-0.386	-4.615	0.498	-1.277	6.418	-0.013
53	-0.686	-9.599	-2.102	-4.332	-5.995	-6.043	-3.67	-0.982	-7.459	-7.64	14.884	6.085	1.077	-1.705	-7.396	-0.348	-3.899	-2.36	-1.864	-1.486	8.198	-10.112	2.305	8.202	-1.885	-7.115	2.476	3.601	1.315	0.558	1.041	0.643	0.366	1.794	4.425	3.656	-0.457	3.979	10.518	2.484	-0.243	2.41	-3.668	-0.64	-6.046	0.227	-3.085	6.657	-1.3
54	-0.205	-9.514	-1.291	-4.442	-5.239	-6.467	-3.359	-1.323	-6.721	-7.542	15.6	6.786	1.696	-1.824	-5.902	-0.755	-3.544	-2.801	-1.097	-1.524	8.921	-10.516	2.831	8.151	-1.124	-7.11	2.814	3.514	2.096	0.495	1.668	0.827	0.499	1.708	5.116	3.772	0.43	4.123	11.484	2.423	0.271	2.254	-2.881	-0.738	-4.952	0.04	-2.372	6.706	-0.744
55	-0.365	-9.139	-1.715	-4.585	-5.498	-6.211	-3.526	-1.263	-6.657	-7.544	15.589	7.78	1.514	-1.74	-6.496	-0.49	-3.792	-2.673	-1.295	-1.612	8.798	-10.617	2.76	8.296	-1.401	-7.282	2.315	3.292	2.01	0.524	1.464	0.977	1.239	1.324	5.37	4.162	-0.559	5.915	12.182	2.64	0.133	2.146	-3.361	-0.562	-5.603	0.33	-2.714	6.707	-0.902
56	-1.288	-8.984	-1.948	-4.73	-5.359	-6.52	-4.432	-1.337	-6.742	-7.794	15.788	8.39	1.328	-1.819	-7.854	-0.179	-4.024	-2.947	-1.507	-1.624	8.986	-11.036	2.589	8.292	-1.427	-7.474	1.838	2.774	2.027	0.306	1.145	0.635	0.929	1.059	5.669	4.163	-0.664	6.587	11.221	2.149	0.226	1.857	-3.664	-0.397	-5.417	0.045	-2.855	6.464	-0.955
57	-1.794	-8.787	-2.072	-5.094	-5.329	-6.506	-4.594	-1.356	-6.671	-7.501	15.851	8.628	1.294	-1.482	-7.664	-0.089	-4.394	-2.844	-1.416	-1.614	8.863	-11.232	2.265	8.034	-1.678	-7.34	1.27	1.934	1.787	0.323	1.051	0.384	0.232	0.98	5.713	4.551	-1.29	6.743	11.303	2.25	-0.184	1.843	-3.796	-0.267	-5.879	0.214	-3.205	6.667	-1.205
58	-1.047	-8.527	-1.495	-5.408	-4.782	-6.417	-3.961	-1.227	-5.747	-7.423	16.72	8.825	1.759	-1.778	-7.47	-0.223	-3.701	-2.95	-0.562	-1.641	9.752	-11.528	3.272	8.136	-0.975	-7.515	1.4	1.283	2.496	0.381	1.848	0.252	-0.537	1.174	6.799	4.784	-0.531	7.131	12.155	2.273	0.671	1.763	-2.564	-0.189	-4.84	0.08	-2.216	6.482	-0.463
59	-1.56	-8.531	-2.075	-5.392	-5.26	-6.583	-4.449	-1.403	-6.084	-7.273	16.477	8.89	1.555	-1.685	-8.106	-0.101	-4.502	-2.795	-1	-1.586	9.384	-11.278	2.758	8.223	-1.695	-8.177	1.047	1.781	2.242	0.566	1.383	0.109	-0.744	1.099	6.628	5.126	-0.847	7.773	12.365	2.367	-0.094	2.004	-2.876	0.082	-5.342	0.332	-2.9	6.606	-1.089
60	-2.165	-9.521	-1.855	-5.523	-5.735	-6.51	-3.523	-1.651	-5.611	-7.425	17.178	9.376	1.857	-1.675	-7.841	-0.124	-4.367	-3.126	-0.663	-1.538	9.71	-11.17	2.9	8.365	-1.354	-8.652	1.731	1.938	2.484	0.278	1.668	0.214	-1.497	0.759	6.636	5.356	-0.021	8.118	13.11	2.509	0.253	2.034	-2.983	-0.017	-5.151	0.247	-2.761	6.793	-1.053
61	-3.207	-10.424	-3.218	-5.578	-7.988	-7.586	-5.039	-1.556	-6.779	-7.327	17.256	10.055	0.724	-1.456	-9.618	0.15	-5.531	-2.934	-1.778	-1.485	8.608	-11.083	1.689	8.397	-3.262	-8.888	0.957	2.603	1.369	0.639	0.382	0.308	-1.961	1.114	5.751	5.572	-0.984	8.589	11.189	2.305	-0.916	2.224	-3.976	-0.193	-5.979	0.212	-3.903	7.051	-2.357
62	-2.535	-10.234	-2.29	-5.741	-7.713	-8.559	-4.14	-1.733	-5.506	-7.296	19.097	10.317	1.874	-1.651	-9.081	0.45	-4.56	-3.242	-0.714	-1.509	9.879	-11.311	2.816	8.758	-3.531	-10.613	0.849	1.562	2.305	0.458	1.284	0.45	-0.977	1.236	7.156	5.805	0.627	8.833	12.172	2.195	0.063	1.806	-2.698	-0.362	-5.297	0.16	-2.774	7.229	-1.36
63	-1.39	-10.568	-1.794	-5.423	-7.242	-8.306	-3.889	-1.553	-4.649	-7.281	20.618	10.461	2.361	-1.616	-8.491	0.318	-4.148	-3.186	-0.085	-1.517	10.34	-11.171	3.352	8.687	-3.452	-11.128	0.594	1.091	3.206	0.61	2.245	0.68	-0.489	1.399	8.142	6.092	1.79	8.57	13.198	2.311	0.679	2.118	-2.4	-0.287	-4.978	0.427	-2.182	7.512	-0.796
64	-2.092	-9.884	-1.929	-5.853	-7.799	-8.156	-4.252	-1.75	-4.82	-7.325	21.271	10.517	2.279	-1.457	-8.778	0.57	-4.548	-3.269	-0.245	-1.439	10.372	-11.245	2.988	8.584	-4.043	-12.056	0.393	0.921	2.787	0.387	1.909	0.661	-1.053	1.294	8.1	6.344	1.983	8.326	12.524	1.92	0.557	1.959	-2.672	-0.465	-5.355	0.363	-2.574	7.333	-0.968
65	-2.13	-10.794	-1.906	-6.214	-7.975	-8.45	-4.185	-2.01	-4.614	-7.257	22.132	10.45	2.12	-1.806	-8.368	0.249	-4.51	-3.312	-0.177	-1.236	10.524	-11.187	2.76	8.076	-4.866	-14.931	0.804	1.309	2.914	0.406	2.016	0.449	-0.101	1.279	8.3	6.713	2.618	7.984	12.502	2.144	0.639	1.893	-2.319	-0.405	-5.469	0.257	-2.454	7.557	-0.823
66	-2.32	-10.885	-1.708	-6.424	-7.813	-8.222	-3.782	-1.977	-3.827	-7.497	22.983	10.607	2.607	-1.726	-8.912	0.318	-4.413	-3.368	-0.082	-1.347	10.565	-11.224	3.026	8.559	-4.224	-16.283	0.559	1.238	2.831	0.357	2.427	0.558	1.109	1.125	8.421	6.666	3.117	7.411	12.282	2.08	0.454	2.62	-2.331	-0.627	-5.887	0.35	-2.35	7.421	-0.822
67	-2.471	-9.454	-2.391	-6.229	-8.541	-7.084	-4.699	-1.94	-4.034	-7.567	23.443	10.732	2.094	-1.694	-9.762	0.802	-5	-3.459	-0.33	-1.177	9.999	-11.103	2.804	9.022	-4.164	-16.923	0.118	1.657	2.697	0.504	1.834	0.675	2.593	1.043	8.121	6.936	3.609	7.653	11.921	2.261	-0.054	2.724	-2.751	-0.669	-6.347	0.141	-2.661	7.526	-1.211
68	-2.567	-9.853	-2.35	-6.282	-8.986	-7.492	-4.497	-1.959	-3.816	-7.847	23.914	10.813	2.24	-1.802	-10.453	0.87	-5.03	-3.581	-0.304	-1.276	9.999	-11.125	2.693	9.313	-3.602	-17.302	-0.215	1.608	2.428	0.282	1.926	0.734	2.303	0.884	8.036	6.939	4.135	7.576	12.048	2.097	-0.116	2.289	-2.942	-0.636	-6.565	0.277	-2.889	7.792	-1.258
69	-1.23	-9.25	-1.367	-6.655	-8.205	-7.236	-3.642	-1.777	-2.598	-8.021	25.361	10.783	3.472	-1.566	-9.161	0.934	-4.119	-3.665	0.72	-1.291	10.819	-11.163	3.57	9.293	-2.509	-17.588	0.463	1.087	3.817	0.517	2.671	1.101	3.398	0.722	8.789	7.143	7.266	7.925	13.238	2.341	0.83	2.391	-1.742	-0.769	-5.781	0.417	-1.872	7.728	-0.37
70	-1.278	-10.225	-2.218	-6.539	-8.957	-6.775	-4.106	-1.488	-3.138	-8.106	25.17	11.037	2.5	-1.472	-10.373	0.834	-5.16	-3.815	-0.023	-1.232	10.029	-10.912	2.78	9.453	-2.858	-17.788	-0.385	1.032	2.899	0.455	2.04	1.275	2.365	0.868	8.071	7.091	7.641	8.108	12.58	2.254	-0.168	2.21	-2.453	-0.702	-6.826	0.662	-2.921	7.719	-1.224
71	-2.23	-10.133	-2.645	-7.194	-8.79	-6.79	-4.789	-1.499	-2.837	-8.555	24.941	11.235	2.278	-1.524	-10.71	0.567	-5.794	-3.81	-0.396	-1.225	9.598	-10.842	2.201	9.359	-2.757	-18.576	-0.84	1.004	2.45	0.525	1.573	1	0.713	0.298	7.479	7.073	7.82	8.224	12.585	2.226	-0.671	2.959	-3.555	-0.995	-7.484	0.458	-3.454	7.798	-1.632
72	-1.866	-9.04	-1.857	-7.486	-8.122	-6.877	-3.705	-1.677	-1.837	-8.5	25.801	11.418	3.035	-1.51	-9.402	0.624	-5.066	-3.758	0.375	-1.173	10.307	-10.692	2.975	9.275	-1.514	-19.545	0.203	1.662	3.178	0.535	2.454	1.008	1.115	0.458	8.161	7.174	9.654	8.572	13.227	2.526	0.024	3.052	-2.514	-1.057	-6.043	0.419	-2.354	7.757	-0.892
73	-2.662	-10.331	-2.709	-7.706	-8.82	-6.693	-4.758	-1.61	-2.325	-8.899	25.172	11.757	2.474	-1.696	-9.191	0.285	-5.698	-3.743	-0.319	-1.355	9.406	-10.715	2.388	9.49	-2.579	-20.971	-1.122	1.402	2.312	0.387	1.504	1.044	0.439	0.507	7.836	7.265	10.001	9.541	12.43	2.15	-0.86	3.276	-3.609	-1.093	-6.946	0.464	-3.273	7.576	-1.624
74	-1.563	-9.174	-1.921	-7.748	-7.948	-6.036	-4.195	-1.766	-1.359	-9.225	26.083	11.911	3.34	-1.547	-10.224	0.683	-5.491	-4.189	0.373	-1.569	10.251	-10.717	3.596	10.275	-1.932	-21.752	0.756	2.362	3.169	0.398	2.315	0.818	1.278	0.601	8.909	7.308	12.296	10.428	13.16	2.255	-0.122	3.281	-3.025	-1.563	-6.444	0.543	-2.61	7.666	-0.75
75	-1.153	-10.288	-1.934	-8.308	-7.663	-6.073	-3.939	-1.599	-1.082	-9.356	26.588	12.136	3.235	-1.736	-9.207	0.495	-5.649	-4.223	0.157	-1.917	9.913	-10.759	3.075	10.063	-2.104	-22.554	0.631	2.284	3.46	0.31	2.309	0.9	2.385	0.56	9.001	7.452	12.951	10.976	12.952	2.162	0.01	3.009	-2.528	-1.412	-5.586	0.047	-2.747	7.746	-0.787
76	-0.645	-8.885	-1.789	-8.498	-6.784	-5.882	-3.578	-1.663	-0.85	-9.21	27.107	12.791	3.264	-1.566	-8.245	0.173	-5.773	-4.34	0.42	-1.541	9.989	-10.507	3.26	9.826	-2.281	-23.405	0.123	1.664	3.777	0.482	2.532	0.579	2.334	0.738	9.017	7.686	13.375	11.973	13.76	2.252	0.044	2.897	-2.505	-1.569	-5.872	0.366	-2.646	7.795	-0.511
77	-1.16	-8.935	-3.004	-8.904	-7.603	-6.48	-4.777	-1.915	-1.718	-9.455	26.427	12.808	2.066	-1.923	-9.343	0.198	-7.012	-4.454	-0.817	-1.661	8.722	-10.534	2.274	10.356	-3.825	-24.892	-0.716	1.167	2.394	0.29	1.026	0.314	1.288	0.824	7.846	7.677	12.894	13.114	12.144	2.047	-1.113	2.746	-3.15	-1.416	-6.621	0.139	-3.841	7.602	-1.702
78	0.66	-8.747	-2.017	-9.055	-7.025	-5.786	-4.354	-1.532	-0.636	-9.263	27.872	13.048	3.341	-1.572	-8.26	0.385	-5.871	-4.336	0.128	-1.775	9.264	-10.24	3.27	10.35	-2.611	-25.193	0.316	1.329	3.323	0.716	2.227	0.505	1.527	0.528	8.668	7.738	14.812	14.399	12.779	2.094	0.074	2.685	-2.678	-1.374	-5.739	0.325	-2.93	7.632	-0.705
79	0.86	-8.619	-1.487	-9.412	-6.498	-6.167	-3.806	-1.539	0.329	-9.26	29.243	13.517	3.72	-1.793	-8.031	0.772	-5.376	-4.376	0.784	-1.633	9.787	-10.05	3.766	10.315	-2.492	-25.48	0.872	2.024	4.07	0.936	2.836	0.481	1.885	0.792	9.408	7.983	16.96	15.932	14.244	2.403	0.769	3.137	-2.169	-1.447	-5.158	0.353	-2.179	7.586	0.165
80	0.906	-8.288	-2.204	-9.492	-6.268	-5.889	-4.362	-1.509	-0.143	-9.261	29.425	13.669	3.464	-1.677	-8.868	0.846	-6.057	-4.478	0.162	-1.73	9.487	-10.057	3.387	10.884	-3.088	-26.473	0.534	2.069	3.66	0.913	2.322	0.565	0.261	0.867	9.105	8.292	17.323	16.411	13.338	2.328	0.174	3.667	-2.703	-1.312	-5.68	0.15	-2.641	7.75	-0.118
81	2.8	-10.118	-1.377	-9.723	-4.864	-6.029	-3.716	-1.712	0.932	-9.571	30.72	13.719	4.531	-1.81	-8.136	0.685	-5.309	-4.783	0.962	-1.877	9.986	-10.481	3.931	10.36	-1.972	-27.07	1.291	1.673	4.476	0.472	3.129	0.352	0.398	1.054	9.551	8.149	18.903	16.475	14.392	2.376	0.97	2.701	-1.914	-1.67	-5.24	0.244	-1.975	7.814	0.496
82	2.627	-8.511	-1.568	-10.467	-4.971	-6.558	-3.977	-1.68	0.851	-9.75	31.109	13.995	4.21	-2.156	-7.887	0.544	-5.449	-4.95	0.886	-1.897	9.673	-10.564	4.179	10.881	-1.617	-27.348	0.667	1.512	4.282	0.461	3.358	0.177	-0.473	1.184	9.721	8.186	19.328	16.569	13.714	2.331	0.587	2.373	-2.666	-1.944	-5.595	0.507	-1.794	7.516	0.373
83	3.202	-9.265	-1.93	-10.822	-4.853	-6.603	-3.859	-1.683	0.728	-9.726	31.143	14.342	3.861	-2.069	-8.082	0.499	-5.763	-5.003	0.804	-1.818	9.391	-10.563	4.15	11.654	-1.696	-28.099	0.264	1.83	4.066	0.307	3.041	0.151	-0.421	1.158	9.429	8.497	18.96	16.342	13.484	2.388	0.601	2.862	-1.939	-1.756	-5.412	0.414	-2.202	7.554	0.18
84	3.05	-8.549	-1.605	-11.108	-4.638	-6.731	-3.792	-1.646	1.271	-9.724	31.74	14.278	4.311	-2.35	-7.708	0.481	-5.622	-5.077	1.204	-1.936	9.845	-10.668	4.077	10.982	-0.988	-28.102	0.56	1.39	4.345	0.396	3.415	0.111	-0.379	0.678	10.103	8.892	19.358	15.899	13.481	2.242	0.771	2.693	-1.136	-1.706	-5.917	0.4	-1.919	7.341	0.606
85	2.426	-8.621	-1.854	-11.313	-4.779	-7.752	-3.82	-1.749	1.573	-10.209	31.51	14.358	3.655	-2.836	-7.937	0.21	-6.123	-5.409	0.728	-2.159	9.081	-10.809	3.75	11.133	-1.754	-28.147	-0.872	0.629	4.012	0.115	2.845	-0.191	-1.116	0.545	10.147	8.714	18.736	15.314	13.94	2.252	0.323	3.022	-2.235	-2.078	-5.857	0.204	-2.236	6.818	-0.097
86	2.416	-10.231	-2.148	-11.105	-5.598	-7.646	-3.97	-1.522	1.376	-10.001	31.349	14.564	3.614	-2.619	-8.72	0.422	-6.638	-5.447	0.204	-2.147	8.749	-10.586	3.403	11.247	-2.374	-28.154	-0.92	1.025	3.832	0.379	2.869	0.055	-1.085	0.652	10.062	8.871	18.156	14.898	12.963	2.412	-0.203	3.162	-2.804	-2.158	-5.928	0.156	-2.505	6.968	-0.279
87	2.817	-9.004	-2.193	-11.734	-5.977	-7.041	-4.109	-1.797	1.536	-10.189	31.673	14.872	3.355	-2.97	-8.839	0.202	-6.809	-5.42	0.311	-2.329	8.471	-10.658	3.34	11.394	-2.331	-28.789	-0.868	1.196	3.626	0.179	2.748	0.137	-0.849	0.037	10.429	9.183	18.248	14.266	12.923	2.297	-0.307	2.988	-2.131	-2.059	-6.108	0.138	-2.751	7.001	-0.253
88	3.366	-9.068	-1.513	-12.144	-5.463	-6.804	-3.359	-1.509	2.541	-10.069	32.795	15.128	4.765	-2.772	-8.341	0.4	-5.986	-5.519	0.924	-2.151	9.211	-10.475	4.142	11.828	-1.629	-28.849	-0.148	1.21	4.263	0.376	3.274	0.109	0.743	0.31	11.278	9.313	19.165	14.446	14.421	2.818	0.596	3.629	-1.538	-1.833	-5.215	0.461	-1.837	7.264	0.661
89	3.67	-10.017	-1.601	-12.488	-6.497	-6.143	-3.465	-1.506	2.555	-10.154	33.015	15.099	4.365	-2.802	-8.38	0.317	-6.082	-5.614	1.049	-2.197	9.042	-10.279	4.384	12.227	-1.388	-29.112	-0.016	0.864	4.261	0.353	3.33	0.3	1.524	0.206	11.293	9.134	19.128	14.91	14.465	2.6	0.526	2.994	-1.75	-1.87	-5.384	0.346	-2.014	7.267	0.635
90	2.807	-9.194	-2.322	-12.919	-9.596	-7.26	-4.044	-1.648	2.125	-10.049	32.89	15.403	3.952	-2.744	-8.968	0.606	-6.862	-5.364	0.288	-1.963	8.186	-10.396	3.238	11.75	-2.121	-29.302	-1.44	-0.299	3.578	0.554	2.763	0.323	0.538	0.145	10.751	9.208	18.407	15.102	12.532	2.465	-0.257	3.461	-2.059	-1.542	-6.323	0.368	-2.838	7.254	-0.14
91	4.61	-9.048	-2.01	-13.264	-10.009	-4.438	-3.51	-1.606	2.818	-9.81	33.959	15.45	4.577	-2.728	-8.545	0.681	-6.436	-5.226	0.914	-2.14	8.661	-10.534	3.798	11.515	-1.55	-29.753	-1.182	-0.652	4.331	0.526	3.287	0.321	0.98	0.23	11.299	9.368	18.87	15.33	13.776	2.555	0.507	3.389	-1.122	-1.395	-5.09	0.4	-2.228	6.855	0.59
92	4.541	-9.738	-1.881	-13.043	-10.927	-1.399	-3.214	-1.559	3.257	-9.844	34.806	15.622	5.135	-2.819	-8.294	0.48	-6.428	-5.342	0.768	-1.968	8.852	-10.832	4.09	11.997	-1.694	-29.244	-1.533	-0.848	4.59	0.49	3.598	0.36	1.808	0.154	11.993	9.446	19.232	15.584	14.182	2.569	0.577	3.288	-0.783	-1.624	-4.019	-0.021	-2.115	7.073	0.882
93	3.684	-9.061	-2.365	-13.286	-12.331	-2.242	-3.601	-1.528	2.609	-9.845	34.944	16.074	4.216	-3.141	-8.835	0.246	-7.104	-5.562	0.394	-2.341	8.242	-10.92	3.46	11.829	-2.061	-29.152	-1.98	-1.096	3.954	0.296	2.989	0.375	1.383	0.27	11.58	9.586	18.621	15.548	13.938	2.607	-0.022	3.734	-1.399	-1.622	-5.585	0.107	-2.253	6.566	0.614
94	5.712	-8.421	-1.865	-13.411	-0.091	-2.474	-2.594	-1.556	3.48	-9.762	36.256	16.502	4.954	-3.103	-8.782	0.347	-6.529	-5.345	0.925	-2.331	8.94	-10.884	4.289	12.365	-1.396	-29.2	-1.279	-0.772	4.593	0.493	3.514	0.193	2.827	0.108	12.455	9.675	19.032	15.552	14.184	2.571	0.656	3.214	-0.77	-1.472	-5.109	0.16	-1.761	6.676	1.146
95	5.593	-6.929	-1.941	-13.79	3.91	-2.58	-2.656	-1.54	3.386	-9.589	36.437	16.628	4.736	-3.067	-8.401	0.35	-6.846	-5.79	0.749	-2.299	8.634	-11.192	4.263	12.947	-1.755	-29.309	-2.117	-1.349	4.369	0.344	3.274	0.016	3.98	0.058	12.116	9.564	18.708	15.591	14.243	2.714	0.437	2.922	-0.676	-1.447	-5.238	0.149	-2.244	7.104	1.109
96	6.516	-6.486	-2.255	-14.044	4.282	-0.046	-2.822	-1.286	3.647	-9.56	36.521	16.755	5.013	-2.867	-8.022	0.412	-6.87	-5.677	0.845	-2.374	8.406	-11.248	3.983	12.683	-1.631	-29.461	-2.291	-1.613	4.523	0.449	3.323	0.118	4.288	-0.132	11.76	9.638	18.509	15.738	14.339	2.548	0.507	3.344	-0.915	-1.344	-5.506	0.318	-2.338	6.782	1.183
97	6.259	-6.268	-2.372	-14.28	4.54	-1.654	-3.202	-1.231	4.094	-9.479	37.137	17.476	5.222	-2.95	-8.73	0.479	-6.891	-5.497	0.911	-2.416	8.25	-11.143	3.978	12.757	-2.027	-30.065	-1.097	-0.523	4.447	0.46	3.147	0.13	4.91	-0.262	12.133	9.875	18.937	15.865	14.037	2.842	0.184	3.459	-1.652	-1.288	-6.429	0.517	-2.311	6.721	1.261
98	6.359	-6.014	-2.266	-14.513	7.176	-2.515	-3.211	-1.32	4.468	-9.635	37.591	17.735	5.267	-3.005	-8.634	0.553	-6.641	-5.5	0.944	-2.223	8.244	-11.312	4.527	13.412	-2.326	-30.575	-0.762	-0.169	4.638	0.447	3.604	-0.181	5.112	-0.209	12.835	9.81	18.748	16.193	14.033	2.815	0.311	3.285	-1.028	-1.223	-5.965	0.298	-1.992	6.515	1.374
99	6.443	-5.539	-2.592	-14.415	8.306	-2.377	-3.427	-1.067	4.224	-9.353	37.769	18.394	5.395	-2.71	-8.48	0.778	-6.784	-5.416	0.552	-2.243	7.741	-11.259	4.418	13.836	-2.495	-30.442	-1.732	-0.448	4.373	0.623	3.084	0.007	4.798	0.043	12.324	10.203	18.956	16.51	13.836	2.907	0.291	3.351	-1.559	-1.23	-6.629	0.751	-2.403	6.741	1.349
100	7.612	-4.212	-1.883	-15.234	9.533	-2.482	-2.508	-1.365	5.477	-9.403	39.189	18.494	5.99	-2.931	-8.494	0.623	-5.976	-5.76	1.137	-2.581	8.875	-11.786	4.883	13.044	-1.983	-30.671	-0.686	-0.551	5.343	0.558	4.066	-0.321	4.534	-0.043	12.684	9.729	20.116	16.455	15.189	2.769	1.142	3.383	-0.573	-1.537	-5.487	0.403	-1.412	6.525	1.879
101	7.554	-3.28	-1.759	-15.247	8.994	-1.968	-2.628	-1.17	5.597	-9.204	39.746	18.47	6.385	-2.75	-8.179	0.721	-5.992	-5.517	1.167	-2.618	8.656	-11.626	5.209	13.819	-2.154	-30.24	-1.278	-0.787	5.297	0.721	4.08	-0.334	3.641	-0.218	13.13	9.957	20.025	16.803	14.61	2.672	1.096	3.614	-0.001	-1.126	-5.158	0.405	-1.368	6.653	1.835
102	7.331	-3.746	-2.24	-15.591	7.491	-3.606	-3.173	-1.372	5.279	-9.409	39.922	18.086	5.673	-2.877	-7.959	0.176	-6.617	-5.922	0.598	-2.691	7.951	-12.096	5.018	14.079	-2.35	-29.936	-1.763	-1.316	5.322	0.433	3.642	-0.594	3.457	-0.311	12.629	9.934	19.663	16.514	14.112	2.598	0.781	3.74	-0.654	-1.375	-5.542	0.382	-1.813	6.502	1.449
103	7.566	-3.301	-2.046	-15.549	8.07	-3.052	-2.778	-1.109	6.085	-9.607	40.465	18.008	5.989	-2.949	-7.87	0.445	-6.387	-5.851	0.668	-2.472	8.009	-11.973	5.116	14.476	-2.836	-29.731	-1.987	-1.478	5.466	0.412	3.884	-0.478	4.46	-0.18	12.882	9.966	19.833	16.633	14.885	2.645	0.914	2.561	-0.454	-1.32	-5.918	0.487	-1.666	6.384	1.654
104	7.042	-1.588	-2.707	-15.842	8.571	-3.173	-3.14	-1.572	5.711	-9.404	40.51	18.019	5.503	-3.234	-8.716	0.459	-7.045	-5.801	0.176	-2.605	7.616	-12.159	4.594	14.665	-3.411	-29.47	-2.657	-1.802	5.168	0.626	3.259	-0.753	4.24	-0.382	12.194	10.025	19.545	17.08	14.538	2.782	0.419	3.492	-1.253	-1.505	-6.515	0.45	-2.074	6.36	1.27
105	7.863	-1.488	-1.88	-15.785	10.198	-2.64	-2.064	-1.412	6.855	-9.454	41.879	17.902	6.377	-3.229	-7.926	0.514	-6.272	-5.762	1.347	-2.793	8.196	-12.35	5.799	14.847	-2.815	-29.129	-1.303	-1.665	5.925	0.492	4.249	-0.538	5.393	-0.562	13.478	9.91	20.451	16.924	14.947	2.719	1.315	3.088	-0.288	-1.656	-5.41	0.498	-1.012	5.983	2.261
106	7.235	-0.532	-2.658	-15.854	10.27	-1.615	-2.674	-1.422	6.271	-9.155	41.686	18.438	5.954	-3.026	-7.9	0.213	-6.851	-5.831	0.735	-2.601	7.649	-12.373	5.032	14.492	-3.566	-28.96	-1.536	-1.147	5.629	0.797	4.042	-0.568	4.143	-0.651	13.225	10.009	20.232	17.097	14.148	2.764	0.657	3.826	-0.565	-1.576	-6.57	0.739	-1.457	5.943	1.57
107	7.739	-0.273	-2.947	-16.196	10.277	-1.404	-2.919	-1.518	6.416	-9.27	41.666	18.545	5.865	-2.931	-8.173	0.253	-6.915	-5.893	0.566	-2.735	7.586	-12.761	5.071	14.731	-3.918	-28.603	-1.288	-0.715	5.58	0.398	3.819	-0.295	4.022	-0.443	12.886	10.068	20.048	17.167	14.279	2.79	0.813	3.184	-0.548	-1.584	-6.431	0.569	-1.792	6.127	1.447
108	8.398	0.427	-2.091	-16.559	11.707	-1.201	-2.119	-1.674	7.651	-9.348	43.088	18.17	7.05	-2.839	-6.834	0.09	-5.883	-6.15	1.818	-2.969	8.322	-12.984	6.388	15.242	-2.594	-28.311	1.048	0.243	6.66	0.616	4.756	-0.358	5.729	-0.66	14.262	10.292	21.345	16.721	15.429	2.83	1.576	3.083	0.367	-1.725	-6.423	0.852	-0.683	6.09	2.523
109	7.8	0.835	-2.687	-16.606	11.154	-0.788	-2.525	-1.691	6.84	-9.313	42.675	18.141	6.4	-3.05	-7.803	-0.063	-6.539	-6.366	1.478	-2.892	7.945	-13.12	5.625	15.062	-2.993	-28.003	0.739	0.766	6.404	0.588	4.112	-0.049	5.575	-0.766	13.401	10.139	21.275	15.553	14.41	2.666	1.247	2.793	0.094	-1.661	-7.104	0.742	-1.067	5.806	1.852
110	8.664	1.55	-1.835	-16.466	12.341	-0.691	-0.997	-1.638	8.69	-9.543	44.025	17.618	7.319	-2.797	-7.071	0.106	-5.511	-6.315	2.47	-2.65	8.726	-13.308	6.921	15.725	-1.938	-27.683	1.953	1.01	7.487	0.57	5.078	0.09	6.395	-0.442	14.561	10.383	22.63	14.605	16.2	2.824	2.262	2.532	0.944	-1.76	-6.401	0.733	-0.076	5.682	2.98
111	8.284	1.97	-2.579	-16.729	12.744	-0.823	-1.513	-1.728	8.206	-9.445	43.813	17.718	6.841	-3.037	-7.483	0.04	-6.039	-6.269	1.953	-2.718	8.308	-13.349	6.659	16.038	-2.657	-27.885	2.266	1.434	6.728	0.618	4.577	-0.066	6.065	-0.733	14.281	10.414	22.51	14.074	15.478	2.84	1.569	3.149	0.132	-2.134	-5.686	0.338	-0.636	5.572	2.227
112	7.418	0.841	-3.002	-16.917	12.782	-0.569	-1.961	-1.848	7.932	-9.502	43.793	17.681	6.181	-3.123	-8.335	-0.079	-6.47	-6.394	1.704	-2.899	8.167	-13.472	6.015	15.555	-3.109	-27.969	1.448	1.344	6.543	0.524	4.264	0.028	6.709	-0.605	13.427	10.352	22.253	13.785	14.673	2.805	1.296	3.612	0.241	-2.125	-6.109	0.421	-1.138	5.518	2.015
113	7.969	1.991	-2.728	-17.261	13.257	0.14	-1.71	-1.965	8.152	-9.543	44.157	17.779	6.656	-2.993	-7.486	0.006	-6.248	-6.264	1.853	-2.711	8.548	-13.236	6.313	15.781	-3.029	-27.71	1.886	1.674	6.805	0.672	4.472	-0.019	6.349	-0.656	14.077	10.753	22.247	13.549	15.372	2.998	1.297	3.522	0.603	-2.179	-5.455	0.348	-0.864	5.605	2.27
114	7.136	1.762	-3.121	-17.652	12.407	-0.011	-1.661	-1.762	8.058	-9.279	44.283	17.855	6.735	-3.038	-7.532	-0.11	-6.46	-6.52	1.674	-2.56	8.455	-13.391	5.971	15.686	-3.221	-27.504	0.532	0.643	6.991	0.783	4.356	0.031	7.051	-0.769	14.016	10.622	22.253	13.409	14.913	2.817	1.213	3.912	0.285	-2.258	-5.498	0.275	-0.857	5.561	2.293
115	7.506	2.602	-3.317	-17.9	11.994	-0.368	-2.098	-1.944	8.187	-9.208	44.167	17.519	6.411	-3.141	-8.044	-0.141	-6.615	-6.545	1.662	-2.536	8.305	-13.436	5.891	15.675	-3.39	-27.235	0	0.565	6.878	0.67	4.127	0.078	6.624	-0.896	14.297	10.621	22.55	13.181	14.884	2.646	1.123	3.654	0.144	-2.571	-6.465	0.641	-0.945	5.775	2.129
116	6.41	2.042	-3.629	-18.027	11.188	0.136	-2.497	-1.765	7.976	-9.267	44.053	17.796	5.757	-3.236	-8.363	0.051	-7.08	-6.449	1.062	-2.266	8.051	-13.329	5.579	16.463	-3.626	-26.719	-0.587	0.306	6.474	0.762	3.737	0.274	6.418	-0.511	13.828	10.832	22.324	13.425	14.419	2.912	0.456	3.724	-0.225	-2.575	-7.146	0.51	-1.401	5.243	1.675
117	7.283	3.576	-3.642	-18.15	11.009	0.755	-2.009	-1.819	7.865	-9.042	44.639	17.687	6.386	-3.062	-7.68	-0.202	-6.787	-6.273	1.438	-1.92	8.398	-13.327	6.225	16.623	-3.381	-26.954	-0.032	0.321	6.755	0.75	4.215	-0.025	6.228	-0.395	14.493	10.965	22.783	13.195	14.711	2.619	0.858	3.769	0.067	-2.541	-5.982	0.328	-0.926	5.092	2.188
118	7.404	2.692	-3.369	-18.51	10.386	1.158	-1.661	-1.826	8.1	-8.949	45.191	17.596	6.779	-3.368	-7.33	-0.369	-6.546	-6.388	1.892	-2.19	8.699	-13.3	6.565	16.534	-2.714	-26.831	0.566	0.802	7.291	0.758	4.488	-0.171	5.847	-0.421	14.872	10.849	23.27	13.11	14.308	2.643	1.158	3.264	0.612	-2.641	-5.186	0.04	-0.666	4.922	2.575
119	6.243	3.403	-4.131	-18.841	9.252	2.618	-2.729	-2.071	8.018	-9.125	44.694	17.42	6.435	-3.241	-8.207	-0.566	-7.058	-6.437	1.125	-2.199	7.844	-13.118	5.958	16.766	-3.238	-27.028	-0.966	0.196	6.85	0.686	3.782	-0.405	4.584	-0.967	14.233	10.854	22.622	13.609	14.888	2.818	0.51	2.795	0.069	-2.577	-5.914	-0.081	-1.447	5.143	1.848
120	6.344	3.233	-4.254	-19.039	8.895	3.264	-2.799	-2.188	8.681	-9.321	44.875	17.372	6.343	-3.494	-7.728	-0.419	-6.952	-6.366	1.237	-2.43	8.426	-13.418	6.031	16.48	-3.325	-26.92	-0.913	0.069	7.006	0.675	3.952	-0.49	4.554	-1.192	14.21	11.022	22.438	13.841	14.877	2.936	0.42	3.823	0.151	-2.799	-5.143	-0.405	-1.48	5.238	1.89
121	6.891	4.474	-4.049	-19.278	7.984	3.418	-2.418	-2.003	8.917	-8.99	45.394	17.52	6.541	-3.431	-6.925	-0.759	-6.6	-6.512	1.469	-2.29	8.908	-13.335	6.425	16.467	-2.739	-26.229	0.035	0.62	7.375	0.648	4.352	-0.356	4.849	-1.524	15.187	11.25	23.054	14.061	14.789	2.843	1.102	3.819	0.571	-2.65	-4.811	-0.225	-1.126	5.469	2.286
122	5.986	4.655	-4.225	-19.189	6.326	3.51	-2.784	-1.762	8.828	-8.679	45.456	17.561	6.08	-3.345	-7.352	-0.796	-6.974	-6.403	1.33	-2.074	8.734	-13.322	6.462	16.978	-2.897	-25.5	-0.498	0.686	7.123	0.775	3.927	-0.48	4.971	-1.057	14.824	11.545	22.818	14.303	14.049	2.773	0.861	3.278	0.278	-2.793	-4.862	-0.071	-1.473	5.498	2.215
123	5.608	5.544	-4.687	-19.023	5.411	4.626	-3.374	-1.394	8.421	-8.24	45.128	17.715	6.106	-3.328	-7.639	-0.428	-7.4	-6.496	1.042	-1.905	8.079	-12.987	5.833	16.826	-3.603	-25.128	-0.748	0.449	6.675	0.902	3.297	-0.502	5.171	-1.138	14.954	11.81	22.6	15.012	14.601	3.171	0.299	3.281	-0.024	-2.899	-5.527	0.075	-1.829	5.343	1.937
124	5.261	5.467	-4.415	-19.418	5.313	5.061	-2.982	-1.49	8.834	-8.573	45.471	17.661	6.492	-3.291	-7.537	-0.801	-7.107	-6.564	1.21	-2.084	8.487	-12.956	6.419	17.278	-3.299	-24.845	0.232	0.803	7.276	0.884	3.95	-0.689	5.61	-1.011	14.962	11.712	22.938	15.282	14.457	3.125	0.825	2.833	0.012	-2.896	-5.409	-0.044	-1.548	5.101	2.27
125	5.263	4.217	-4.198	-19.906	4.6	4.307	-2.442	-1.601	9.428	-8.58	46.113	17.556	7.114	-3.35	-6.459	-0.848	-6.473	-6.641	1.852	-2.154	9.048	-13.024	7.009	17.08	-3.103	-24.392	0.604	0.902	7.527	0.542	4.083	-0.993	5.52	-0.897	16.169	11.963	23.412	15.287	14.803	2.875	1.182	3.323	0.366	-3.22	-4.629	-0.318	-1.161	5.037	3.068
126	5.041	4.952	-4.736	-19.686	3.21	4.003	-2.601	-1.725	9.266	-8.514	46.005	17.174	6.958	-3.473	-6.809	-1.053	-7.027	-6.669	1.582	-2.243	8.565	-12.835	6.952	17.316	-3.228	-23.928	0.158	0.849	7.673	0.607	4.154	-1.046	5.128	-0.523	15.413	11.933	22.989	15.481	14.535	2.98	0.713	3.826	0.449	-2.893	-4.874	-0.195	-1.72	5.117	2.527
127	4.219	5.411	-5.009	-19.886	2.043	3.529	-3.373	-1.659	9.409	-8.669	45.86	17.572	6.435	-3.459	-7.994	-0.809	-7.193	-6.828	1.252	-2.447	8.244	-13.06	6.349	16.988	-3.302	-23.229	0.602	1.424	7.162	0.438	3.755	-0.842	4.534	-0.225	15.271	12.254	22.547	15.607	14.176	3.042	0.476	3.547	0.485	-3.008	-5.22	-0.278	-2.014	5.443	2.286
128	3.316	4.022	-5.082	-20.223	2.417	3.628	-2.852	-1.752	9.35	-8.26	45.692	17.051	6.486	-3.5	-6.718	-1.091	-7.167	-6.913	1.507	-2.226	8.29	-13.07	6.75	17.347	-3.502	-22.447	0.489	1.202	7.395	0.411	3.772	-0.863	3.803	-0.028	15.922	12.493	22.742	15.615	13.683	2.922	0.597	4.111	0.068	-3.126	-4.881	-0.446	-2.211	5.371	2.192
129	2.585	2.643	-4.576	-20.282	4.071	3.604	-2.842	-1.707	10.037	-8.526	46.471	17.184	7.055	-3.588	-7.057	-1.069	-6.81	-7.067	1.699	-2.168	8.403	-13.08	6.547	16.704	-2.943	-21.391	1.789	2.071	7.446	0.238	4.336	-0.88	4.23	0.27	16.261	12.56	23.037	15.479	14.352	2.857	1.018	3.778	0.536	-3.258	-4.321	-0.415	-1.686	4.975	2.563
130	2.548	3.635	-5.351	-20.402	3.037	2.831	-4.004	-1.425	9.346	-8.194	45.479	17.462	5.853	-3.604	-7.839	-1.143	-7.727	-6.813	0.954	-1.962	7.848	-12.969	5.958	17.567	-3.594	-20.774	0.913	1.895	6.64	0.305	3.749	-0.801	3.563	0.277	15.68	12.638	22.195	15.989	13.772	3.03	-0.08	4.405	-0.11	-2.99	-5.604	-0.104	-2.512	5.111	1.799
131	1.484	1.253	-5.182	-20.662	2.235	1.541	-3.25	-1.427	9.481	-7.773	46.149	17.32	6.515	-3.783	-7.379	-1.196	-7.15	-6.678	1.704	-2.211	8.373	-12.879	6.472	17.346	-2.866	-20.979	1.429	1.742	7.386	0.296	4.133	-0.678	3.816	0.428	16.527	12.747	22.629	15.832	14.083	3.007	0.509	4.496	0.722	-3.118	-5.581	-0.362	-2.417	5.174	2.146
132	1.092	1.677	-5.317	-20.531	1.51	0.997	-3.399	-1.607	9.348	-7.387	46.052	17.48	6.287	-3.573	-7.478	-1.18	-7.427	-6.547	1.224	-1.56	8.275	-12.634	6.248	17.748	-2.491	-20.861	2.306	3.141	6.994	0.353	4.201	-0.227	3.194	0.04	16.835	13.119	22.134	16.222	13.39	3.278	0.067	4.483	0.432	-2.97	-6.263	0.075	-2.514	5.334	2.127
133	1.084	1.63	-4.96	-21.111	1.891	0.123	-3.516	-1.557	10.446	-7.834	46.498	17.511	6.768	-3.775	-7.432	-1.147	-7.4	-6.463	1.609	-1.776	8.539	-12.551	6.357	17.552	-2.891	-20.779	2.927	3.647	7.365	0.458	4.397	-0.292	3.055	-0.378	17.177	13.006	22.884	16.067	13.417	2.955	0.418	4.349	0.144	-3.219	-5.951	-0.12	-2.465	5.214	2.366
134	0.091	-0.899	-4.507	-20.98	1.994	-0.438	-2.353	-1.367	10.985	-7.511	46.863	17.175	7.411	-3.488	-6.753	-1.283	-6.948	-6.522	2.107	-2.003	9.22	-12.474	6.881	17.601	-2.17	-19.854	2.24	2.795	7.822	0.384	4.887	-0.042	3.148	-0.602	17.722	13.454	23.479	16.09	13.786	3.303	1	4.355	0.723	-3.28	-5.959	0.107	-2.164	5.318	2.604
135	0.82	1.242	-4.834	-21.694	1.88	-1.257	-3.007	-1.604	10.799	-7.558	46.755	17.245	6.704	-4.015	-7.71	-1.203	-7.18	-6.844	1.801	-2.444	8.915	-12.673	6.588	17.616	-2.612	-19.725	1.753	2.173	7.899	0.227	4.816	-0.316	1.476	-1.464	16.95	13.183	23.027	15.416	13.913	3.018	0.71	4.553	0.404	-3.355	-5.554	-0.477	-2.349	4.98	2.393
136	-0.392	-0.771	-4.705	-21.834	1.66	-1.608	-2.715	-1.861	10.986	-7.577	47.004	17.09	7.341	-3.752	-7.492	-1.427	-7.156	-7.176	1.9	-2.426	8.953	-12.746	6.63	16.91	-2.559	-19.769	1.73	1.64	8	0.027	4.706	-0.233	1.915	-1.444	17.027	13.198	23.437	15.365	13.276	2.699	0.823	4.574	0.053	-3.604	-5.198	-0.693	-2.465	4.919	2.499
137	0.541	-0.156	-4.119	-22.038	1.78	-2.724	-2.554	-1.768	12.105	-7.879	47.642	17.194	7.581	-3.944	-6.713	-1.494	-6.325	-6.98	2.728	-2.221	9.455	-12.541	7.785	17.938	-2.053	-19.808	2.998	2.334	8.601	-0.031	5.588	-0.112	2.297	-1.775	17.981	13.243	24.036	15.29	14.915	2.764	1.532	3.842	0.439	-3.901	-4.075	-0.781	-1.684	4.593	2.959
138	-1.102	-1.131	-4.642	-22.246	1.519	-3.327	-3.428	-1.772	11.663	-8.022	47.305	17.412	6.732	-3.708	-7.471	-1.309	-7.093	-6.979	2.147	-2.202	8.794	-12.537	7.045	18.143	-2.925	-19.71	3.209	2.834	8.021	-0.049	4.952	-0.22	1.652	-1.893	17.127	13.544	23.418	15.211	14.279	2.708	0.8	3.492	0.225	-3.48	-4.699	-0.669	-2.449	4.616	2.166
139	-0.784	-1.095	-4.278	-22.13	2	-3.649	-2.86	-1.464	11.736	-7.309	48.233	17.571	7.347	-3.786	-6.7	-1.253	-6.517	-6.753	2.67	-1.765	9.311	-12.101	7.79	18.708	-2.504	-19.442	3.336	2.594	8.542	0.106	5.614	-0.116	2.163	-1.962	18.246	13.776	23.839	15.388	14.976	3.081	1.564	4.024	0.849	-3.478	-4.274	-0.679	-1.824	4.567	3.02
140	-0.712	-0.756	-4.042	-22.18	1.33	-4.455	-2.529	-1.643	12.914	-7.701	48.567	17.595	7.174	-4.114	-7.068	-1.331	-6.576	-6.867	2.89	-1.768	9.641	-12.228	8.038	18.543	-2.299	-19.601	3.548	2.667	8.99	0.09	5.757	-0.266	1.958	-2.117	18.164	13.872	24.194	14.944	15.052	2.956	1.867	3.794	1.663	-3.556	-4.723	-0.505	-1.696	4.521	3.09
141	-3.23	-2.552	-5.176	-22.402	-0.006	-4.476	-3.365	-1.685	11.928	-7.439	47.589	17.637	6.31	-4.029	-8.33	-1.133	-7.732	-6.658	1.9	-1.822	8.514	-12.119	6.535	18.171	-3.559	-19.167	2.084	2.384	7.961	0.379	4.539	-0.352	0.454	-2.33	17.51	13.89	22.979	15.115	13.942	2.914	0.43	4.33	0.443	-3.338	-5.99	-0.518	-2.789	4.535	1.997
142	-3.911	-1.998	-5.246	-22.377	-0.699	-4.81	-3.342	-1.476	12.043	-7.225	47.687	17.305	6.343	-3.976	-8.606	-1.034	-7.747	-6.846	2.092	-2.03	8.764	-12.266	6.722	18.344	-3.545	-18.85	2.388	2.8	8.032	0.191	4.567	-0.162	1.222	-2.084	17.634	14.118	23.321	15.02	13.725	2.893	0.441	5.042	0.641	-3.224	-6.496	-0.549	-2.671	4.485	2.067
143	-3.574	-1.613	-4.061	-22.799	0.432	-5.08	-1.898	-1.744	13.567	-7.246	48.744	17.317	7.587	-4.102	-7.341	-1.265	-6.468	-6.771	3.092	-1.854	9.561	-12.261	8.08	18.966	-2.512	-18.9	3.519	2.695	9.173	-0.008	5.694	-0.283	1.533	-1.936	18.717	14.46	24.621	14.648	14.482	2.644	1.546	4.994	1.784	-3.388	-5.013	-0.673	-1.498	4.166	3.197
144	-3.97	-1.039	-4.464	-22.774	0.778	-5.528	-2.402	-1.384	13.491	-7.131	48.56	17.743	7.337	-4.091	-7.873	-1.281	-6.702	-6.563	2.722	-1.8	9.489	-12.135	7.756	18.927	-2.972	-18.65	3.101	2.651	9.001	0.513	5.571	-0.211	0.414	-1.857	18.357	14.875	23.941	14.798	15.126	2.978	1.307	4.582	1.093	-3.303	-5.011	-0.821	-1.995	4.367	2.826
145	-3.187	-0.793	-4.039	-22.911	0.92	-6.044	-1.873	-1.609	13.96	-7.229	48.967	17.656	7.755	-4.385	-7.918	-0.981	-6.541	-6.542	2.776	-1.779	9.818	-12.202	7.95	18.583	-2.825	-18.357	3.36	2.229	9.61	0.417	5.99	-0.608	0.161	-1.836	18.839	14.74	24.043	14.753	14.436	2.739	1.531	4.061	1.114	-3.238	-3.858	-0.956	-1.657	4.022	3.141
146	-3.78	-0.269	-4.274	-22.905	1.125	-6.238	-2.203	-1.48	13.94	-7.107	48.939	17.999	7.74	-4.255	-8.091	-1.093	-6.863	-6.54	2.529	-1.783	9.77	-11.944	7.907	19.269	-3.684	-17.73	3.012	2.347	9.279	0.759	5.832	-0.589	-0.667	-1.849	18.545	15.047	23.844	14.68	14.663	3.159	1.296	4.415	0.954	-3.345	-4.27	-0.847	-2.046	4.053	2.918
147	-5.011	-0.693	-5.463	-23.303	0.271	-6.867	-3.191	-1.4	12.975	-7.125	47.928	17.545	6.408	-4.548	-8.312	-1.321	-7.772	-6.622	1.515	-1.825	9.023	-11.807	6.849	18.849	-4.534	-17.278	2.339	2.392	8.776	0.63	5.006	-0.788	-2.328	-2.1	17.913	15.009	22.619	14.396	12.868	2.607	0.32	3.976	0.907	-3.132	-4.86	-1.009	-3.061	3.875	1.965
148	-5.639	-1.551	-4.963	-23.446	1.303	-6.912	-2.027	-1.334	14.313	-6.981	48.588	17.323	7.143	-4.654	-8.26	-1.146	-7.04	-6.577	2.004	-1.715	9.309	-11.583	7.249	18.937	-3.933	-16.687	4.999	4.671	9.23	0.962	5.27	-0.462	-2.018	-1.707	18.293	15.135	23.412	14.323	14.378	3.188	0.896	3.911	0.985	-3.26	-4.661	-0.953	-2.581	3.763	2.536
149	-5.843	-0.686	-5.666	-23.532	0.717	-7.195	-3.129	-1.273	13.968	-7.114	48.198	16.888	6.516	-4.546	-9.325	-1.089	-7.854	-6.695	1.415	-2.045	8.836	-11.247	6.87	18.948	-4.265	-16.282	3.189	3.547	8.52	1.133	5.015	-0.448	-2.71	-1.651	17.523	15.31	22.769	14.315	13.672	2.98	0.155	4.435	0.637	-2.917	-4.893	-1.09	-3.211	3.844	1.917
150	-6.628	-0.386	-6.303	-23.212	-0.238	-7.501	-3.151	-1.481	13.857	-7.507	47.618	16.845	5.47	-4.565	-10.391	-1.015	-8.458	-6.91	1.005	-1.872	8.571	-11.409	6.111	18.891	-5.001	-16.116	1.835	2.837	8.171	1.183	4.026	-0.623	-4.404	-1.981	17.011	14.937	22.509	14.054	12.393	3.04	-0.279	4.499	0.214	-2.631	-6.135	-1.117	-3.919	3.787	1.405
151	-3.482	2.423	-5.018	-23.107	1.348	-7.428	-2.026	-1.144	15.771	-7.284	49.163	16.989	7.515	-4.699	-8.831	-0.864	-7.301	-6.651	2.506	-1.563	9.789	-11.29	7.809	19.542	-3.655	-15.896	2.953	2.228	9.905	1.431	5.592	-0.421	-3.251	-1.719	18.692	15.125	24.355	14.094	14.12	2.839	1.069	3.705	2.102	-2.401	-4.419	-1.009	-2.544	3.578	2.822
152	-5.788	0.791	-5.906	-23.42	0.282	-7.667	-2.82	-1.403	15.155	-7.209	48.605	17.028	6.433	-4.5	-9.345	-1.111	-8.366	-6.81	1.473	-1.449	8.806	-11.329	6.633	19.242	-4.585	-15.75	1.412	1.752	8.766	1.3	4.572	-0.603	-3.694	-1.666	17.914	15.189	23.294	13.842	12.943	3.046	0.069	4.468	1.48	-2.232	-6.062	-1.084	-3.363	3.613	1.837
153	-6.712	-0.646	-4.801	-23.048	0.794	-7.377	-2.299	-1.086	15.985	-7.16	48.991	17.133	7.177	-4.065	-8.202	-0.992	-7.942	-6.615	2.026	-1.291	9.695	-11.504	7.315	19.636	-4.802	-15.685	2.283	2.322	9.605	1.692	5.046	-0.281	-3.343	-1.638	18.697	15.443	23.875	13.977	13.665	3.138	0.859	4.49	2.176	-2.145	-5.072	-1.066	-2.803	3.601	2.713
154	-5.93	0.12	-4.841	-23.546	0.88	-7.515	-2.755	-1.158	16.209	-7.34	49.073	16.974	7.786	-4.142	-8.202	-1.52	-7.608	-6.627	2.126	-1.733	9.765	-11.607	7.536	19.39	-4.693	-16.034	2.628	2.604	9.588	1.375	5.386	-0.373	-3.312	-1.905	18.839	15.33	23.98	13.691	13.549	2.872	0.67	3.669	1.851	-2.464	-5.534	-1.352	-2.771	3.406	2.737
155	-7.402	-0.891	-5.127	-23.602	0.801	-7.557	-2.453	-1.537	15.641	-7.089	48.52	17.11	7.848	-4.371	-8.934	-1.112	-7.719	-6.875	1.867	-1.811	9.409	-11.739	7.283	19.146	-4.892	-16.014	3.205	3.456	9.691	1.257	4.922	-0.471	-3.662	-2.214	19.258	15.394	23.851	13.204	13.266	2.914	0.402	4.014	1.777	-2.666	-5.282	-1.515	-2.862	3.135	2.637
156	-7.027	-0.202	-5.17	-23.556	0.481	-7.927	-2.317	-1.224	16.385	-7.18	48.438	16.938	7.219	-4.423	-9.292	-0.92	-7.772	-6.737	1.934	-1.729	9.406	-11.619	7.041	19.016	-4.693	-15.897	3.099	3.4	9.647	1.542	4.803	-0.173	-3.674	-2.032	18.902	15.397	23.583	13.141	13.991	3.118	0.362	3.226	2.333	-2.279	-4.151	-1.511	-3.02	3.191	2.403
157	-5.883	0.554	-4.999	-23.932	1.137	-7.974	-2.027	-1.335	17.058	-7.208	48.623	17.228	7.915	-4.204	-8.316	-1.126	-7.505	-7.095	2.12	-1.571	9.68	-11.485	6.72	18.27	-4.577	-15.409	2.978	3.151	10.466	1.471	5.326	-0.155	-2.168	-2.14	19.149	15.438	24.018	13.541	13.61	3.006	0.743	4.073	2.134	-2.322	-4.602	-1.441	-2.444	3.038	2.671
158	-7.532	1.204	-5.138	-23.814	1.374	-7.497	-2.26	-1.413	17.253	-7.522	48.524	17.313	7.826	-4.288	-8.663	-1.19	-7.524	-7.029	1.755	-1.309	9.392	-11.321	7.375	19.705	-5.246	-15.896	2.383	2.474	10.18	1.471	5.045	-0.062	-2.898	-2.235	19.271	15.619	24.296	13.958	13.835	2.944	0.557	3.585	2.29	-2.022	-5.508	-1.559	-2.672	2.81	2.65
159	-8.201	0.718	-5.347	-24.078	1.409	-7.358	-2.495	-1.298	17.193	-7.472	48.209	17.425	8.184	-3.916	-8.782	-0.999	-7.996	-7.177	1.683	-1.146	9.188	-11.045	6.745	19.493	-5.573	-15.532	2.34	3.167	10.042	1.699	4.67	-0.005	-2.629	-1.822	18.739	15.875	24.166	14.185	13.048	3.126	0.151	4.468	1.735	-1.705	-4.678	-1.525	-3.062	2.69	2.43
160	-7.709	1.837	-4.847	-24.314	1.783	-7.378	-1.936	-1.204	17.657	-7.294	48.5	17.447	8.269	-3.781	-8.54	-0.881	-7.238	-7.169	2.077	-0.964	9.743	-10.712	7.361	19.662	-5.273	-15.028	2.756	2.712	10.336	1.686	4.795	-0.181	-1.237	-2.162	19.906	16.008	25.043	14.304	13.944	3.289	0.637	4.165	2.778	-1.706	-5.134	-1.474	-2.615	2.885	2.843
161	-7.226	3.034	-4.958	-24.656	1.983	-7.596	-1.645	-1.187	17.767	-7.338	48.56	17.379	8.641	-3.714	-8.244	-1.268	-7.528	-7.357	2.066	-1.324	9.753	-10.572	7.506	19.746	-5.374	-14.911	3.061	3.163	10.76	1.569	4.168	-0.146	-1.139	-2.146	19.629	15.92	24.978	14	12.997	3.188	0.407	4.8	2.735	-1.775	-4.83	-1.721	-2.748	2.972	2.911
162	-7.435	3.02	-5.823	-24.808	1.664	-7.799	-2.165	-1.335	17.169	-7.292	47.626	17.14	7.43	-4.435	-8.309	-1.488	-8.196	-7.487	1.339	-1.359	8.92	-10.733	6.715	19.14	-5.945	-14.605	2.48	3.409	10.064	1.241	3.907	-0.552	-3.205	-2.797	19.193	15.92	24.436	13.715	12.962	2.899	-0.074	4.327	2.058	-2.143	-5.042	-2.001	-3.37	2.578	2.16
163	-9.299	0.92	-5.441	-24.792	2.16	-7.872	-2.465	-1.289	18.264	-7.629	47.995	17.028	7.587	-4.249	-8.778	-1.161	-8.135	-7.532	1.601	-1.348	9.225	-10.843	6.624	18.618	-6.064	-13.739	3.176	3.988	10.514	1.418	4.123	-0.288	-3.439	-3.017	19.307	15.969	24.792	13.733	13.419	3.105	0.09	3.473	2.068	-2.098	-6.346	-1.849	-3.383	2.695	2.672
164	-9.67	0.844	-5.402	-25.034	2.526	-8.03	-2.818	-1.484	18.561	-7.881	48.228	17.061	8.025	-4.518	-8.501	-1.385	-8.148	-7.387	1.675	-1.318	9.312	-10.772	7.072	19.248	-5.779	-14.081	3.288	3.597	10.676	1.059	4.242	-0.784	-3.47	-3.221	19.319	15.709	24.27	13.487	13.932	2.87	0.228	3.708	1.961	-2.061	-5.149	-2.34	-3.003	2.52	2.599
165	-7.263	3.49	-5.12	-25.146	3.255	-8.017	-1.957	-1.303	18.796	-7.653	48.882	16.923	8.794	-4.379	-7.762	-1.415	-7.403	-7.683	2.103	-1.076	9.796	-10.905	7.751	19.766	-5.531	-13.691	3.685	3.639	11.342	1.388	5.091	-1.007	-2.563	-3.068	19.81	15.664	24.452	13.498	14.073	2.698	1.058	3.951	3.059	-1.978	-5.037	-2.111	-2.55	2.382	3.557
166	-6.478	4.03	-4.801	-25.258	3.478	-7.992	-1.258	-1.481	19.447	-7.486	48.927	16.823	8.607	-4.342	-8.249	-1.021	-7.31	-7.436	2.61	-1.432	9.995	-10.957	8.121	19.836	-4.99	-13.278	3.86	3.539	11.328	1.269	5.047	-0.996	-2.775	-3.415	19.985	15.71	25.286	13.685	13.971	2.852	1.148	4.099	3.556	-1.848	-3.579	-2.253	-2.111	2.099	4.046
167	-10.962	-1.615	-5.102	-25.399	3.223	-7.852	-1.333	-1.597	19.383	-7.303	49.098	16.708	8.941	-4.212	-7.752	-1.32	-7.321	-7.597	2.636	-1.135	9.867	-10.81	7.846	19.42	-4.857	-12.915	3.406	3.263	11.57	1.26	5.196	-0.945	-1.907	-3.31	20.317	15.809	25.202	13.549	13.388	2.959	0.857	4.536	3.3	-2.085	-3.415	-2.125	-2.332	2.392	3.942
168	-11.407	-1.031	-5.666	-25.314	3.41	-7.379	-2.151	-1.019	19.215	-7.17	49.057	16.608	8.836	-4.074	-8.329	-1.114	-7.74	-7.394	2.281	-1.061	9.707	-10.735	7.685	20.006	-5.447	-12.58	3.451	3.685	11.108	1.41	5.268	-1.351	-1.227	-2.911	19.751	15.85	25.092	13.816	13.679	2.884	0.705	4.333	3.307	-2.08	-5.693	-2.115	-2.665	2.311	3.914
169	-8.376	5.124	-6.086	-25.086	3.277	-7.398	-2.169	-1.315	19.153	-6.988	48.691	17.421	7.888	-4.212	-8.035	-1.583	-8.073	-7.32	1.705	-0.937	9.426	-10.759	7.139	19.604	-6.504	-12.607	2.973	3.49	10.78	1.425	4.816	-1.212	-0.836	-2.615	19.795	16.228	24.549	13.782	13.19	2.978	0.247	4.377	2.829	-1.819	-5.759	-2.335	-2.865	2.043	3.549
170	-10.414	0.833	-6.087	-25.706	3.769	-7.84	-1.445	-1.275	19.491	-7.187	49.842	17.397	8.788	-3.931	-8.003	-1.207	-7.874	-7.422	2.256	-1.042	9.909	-11.132	7.747	19.561	-6.172	-12.525	3.303	3.466	11.41	1.203	5.277	-1.637	-0.47	-2.724	20.352	16.191	25.318	14.03	12.93	2.482	0.72	3.969	3.679	-1.812	-4.106	-2.298	-2.514	2.028	4.059
171	-12.646	0.131	-6.445	-25.914	3.41	-7.456	-1.38	-1.267	19.704	-7.47	49.521	17.878	8.164	-4.348	-8.87	-1.549	-8.596	-7.349	1.634	-0.782	9.23	-11.082	7.215	20.144	-7.008	-12.559	2.122	2.837	10.896	1.271	4.586	-1.837	-0.472	-2.419	20.078	16.429	24.937	13.818	13.351	2.731	0.093	4.302	2.593	-2.145	-5.411	-2.259	-2.946	1.625	3.891
172	-11.097	1.854	-5.687	-26.05	4.574	-7.27	-0.656	-1.456	20.75	-7.296	50.536	17.882	9.445	-4.081	-8.705	-1.042	-7.763	-7.124	2.797	-1.079	9.873	-11.146	8.105	20.216	-6.516	-12.615	4.472	4.081	11.775	1.342	5.423	-1.538	0.245	-2.363	21.486	16.452	25.822	13.762	14.09	2.816	0.885	4.936	3.116	-2.335	-4.307	-2.37	-2.258	2.025	4.667
173	-13.705	-1.826	-5.762	-26.393	4.212	-7.556	-0.284	-1.597	20.553	-7.08	50.566	17.912	8.861	-4.303	-7.493	-1.586	-8.083	-7.51	2.258	-0.911	9.716	-11.104	7.664	19.821	-6.89	-12.75	4.37	4.734	11.933	1.244	5.476	-1.368	0.798	-1.975	21.251	16.406	25.68	14.042	14.059	2.856	0.905	4.232	2.794	-2.527	-4.528	-2.359	-2.256	1.768	4.484
174	-14.167	-1.772	-6.102	-26.35	3.424	-7.709	-0.27	-1.367	20.724	-7.052	49.875	17.406	8.393	-4.306	-9.128	-1.386	-8.259	-7.514	1.914	-0.859	9.276	-10.965	7.495	19.727	-7.072	-12.671	3.769	4.534	11.495	1.373	5.161	-1.159	0.627	-1.631	20.662	16.31	25.35	14.267	12.617	2.678	0.415	3.69	2.647	-2.322	-4.464	-2.464	-2.809	1.95	3.93
175	-13.15	-0.026	-5.867	-26.201	3.997	-7.523	0.223	-1.08	21.155	-7.228	50.491	17.72	8.774	-4.514	-8.229	-1.16	-8.088	-7.775	2.422	-0.849	9.986	-11.464	8.277	20.615	-7.131	-12.754	4.258	4.384	12.277	1.49	5.303	-1.22	1.305	-1.902	22.026	16.314	26.016	14.213	13.464	2.574	0.681	3.803	2.568	-2.563	-4.057	-2.466	-2.604	1.773	4.132
176	-14.449	-1.133	-6.206	-26.355	3.469	-7.484	-0.273	-0.797	21.784	-7.252	50.297	18.064	8.731	-4.393	-9.09	-1.411	-8.171	-7.581	1.931	-0.852	9.812	-11.704	7.9	20.02	-7.062	-12.603	3.719	4.198	11.851	1.517	5.341	-1.295	1.379	-1.6	21.454	16.491	26.103	14.555	13.668	2.751	0.624	3.909	2.753	-2.624	-4.418	-2.135	-2.663	1.799	4.024
177	-14.537	-1.07	-6.604	-26.134	2.951	-7.314	-0.473	-0.814	21.402	-7.135	49.708	18.237	8.332	-4.301	-9.253	-1.436	-8.623	-7.41	1.47	-0.492	9.244	-11.759	7.313	20.418	-7.468	-12.409	3.396	4.526	11.816	1.661	4.594	-1.508	1.193	-1.682	21.404	16.58	25.708	14.589	12.426	2.843	0.037	4.292	2.471	-2.298	-5.246	-2.176	-3.164	1.656	3.643
178	-14.576	-0.978	-6.004	-26.37	3.64	-7.294	0.76	-0.653	21.922	-6.96	50.63	18.308	8.74	-4.744	-9.045	-1.441	-7.462	-7.631	2.499	-0.655	10.374	-11.876	8.567	20.824	-6.673	-12.525	5.457	5.533	12.569	1.579	5.618	-1.927	2.817	-1.872	22.334	16.389	26.885	14.702	14.034	2.599	0.891	3.634	4.227	-2.34	-3.407	-2.152	-2.242	1.618	4.458
179	-14.703	0.431	-6.727	-27.08	2.917	-7.54	-0.155	-0.544	21.135	-6.956	49.843	18.026	8.71	-4.536	-9.626	-1.649	-8.084	-7.68	2.185	-0.598	9.906	-12.288	7.908	20.553	-6.921	-12.493	4.387	4.594	12.09	1.663	5.282	-2.16	2.062	-1.973	21.35	16.134	26.333	14.3	13.511	2.557	0.054	4.118	3.289	-2.527	-4.421	-2.537	-2.759	1.259	3.667
180	-15.639	-2.573	-7.098	-27.071	2.647	-7.414	-0.905	-0.715	20.96	-7.25	49.456	17.617	8.164	-4.508	-10.12	-1.572	-8.138	-7.998	1.602	-0.886	9.366	-12.13	7.49	20.511	-7.602	-12.688	4.024	4.518	12.303	1.256	5.057	-1.99	1.276	-1.915	20.819	16.16	26.23	14.205	12.591	2.535	-0.108	3.309	3.221	-2.676	-4.567	-2.59	-3.444	1.316	3.415
181	-15.651	-1.079	-6.856	-27.147	2.106	-7.631	-0.675	-0.457	21.338	-7.001	49.81	17.644	8.38	-4.537	-10.087	-1.307	-8.242	-7.946	1.67	-0.602	9.05	-12.118	7.411	19.966	-7.29	-12.61	4.287	5.102	12.401	1.401	5.18	-2.106	0.533	-2.233	21.406	16.299	25.994	13.833	13.281	2.432	0.139	4.191	3.052	-2.793	-4.651	-2.761	-3.39	1.51	3.818
182	-14.157	-1.59	-7.066	-27.128	2.104	-7.581	-0.126	-0.137	20.799	-7.116	49.554	17.912	8.357	-4.588	-10.612	-1.375	-8.424	-8.147	1.711	-0.817	9.317	-11.943	7.222	19.876	-7.908	-12.927	4.017	5.008	12.107	1.415	5.127	-2.16	1.345	-2.019	21.646	16.184	26.199	13.932	13.005	2.655	-0.293	3.544	2.604	-2.999	-4.163	-2.575	-3.377	1.532	3.527
183	-15.392	-1.396	-6.815	-26.738	2.18	-6.924	0.236	0.288	21.726	-6.921	49.87	17.594	8.465	-4.536	-10.173	-1.464	-7.95	-7.878	1.709	-0.324	9.152	-11.608	7.615	20.628	-7.756	-12.876	4.602	5.103	12.457	1.637	5.712	-1.994	1.181	-1.641	22.131	16.211	26.214	14.054	12.787	2.749	-0.063	3.603	2.538	-2.728	-3.233	-2.611	-2.989	1.468	3.775
184	-16.512	-1.363	-5.58	-27.099	2.991	-7.132	1.029	0.555	22.981	-7.114	51.114	17.885	9.746	-4.614	-9.312	-1.329	-6.675	-7.97	3.365	-0.454	10.119	-11.424	9.032	20.623	-6.738	-12.609	6.127	5.447	13.999	1.587	6.984	-2.1	2.738	-1.549	23.3	16.456	27.014	14.042	13.46	2.265	1.355	4.006	3.653	-2.879	-1.921	-2.451	-1.888	1.451	4.996
185	-16.916	-2.448	-6.007	-26.941	2.863	-6.547	0.486	0.348	22.489	-6.774	50.817	18.067	9.96	-4.103	-10.126	-0.952	-7.284	-7.826	2.708	-0.455	9.884	-10.872	8.678	21.032	-7.065	-12.551	5.572	5.27	13.453	1.933	6.721	-1.873	2.802	-1.306	23.079	16.585	26.903	13.964	14.026	2.59	1.242	3.392	3.315	-2.879	-2.818	-2.334	-2.169	1.614	4.855
186	-16.691	-1.656	-7.18	-27.296	2.207	-6.733	0.184	0.776	21.952	-7.147	49.289	17.671	9.367	-4.072	-11.995	-0.928	-8.211	-7.877	1.625	-0.417	8.802	-10.883	7.794	20.806	-7.476	-12.791	4.474	4.822	12.483	1.78	5.889	-2.189	1.384	-1.454	22.633	16.582	25.997	14.095	12.315	2.532	0.098	3.393	2.413	-3.062	-3.511	-2.473	-2.974	1.453	4.081
187	-16.511	-2.819	-6.906	-27.121	2.004	-6.867	-0.428	0.718	21.781	-7.024	49.375	18.002	9.066	-4.448	-11.933	-0.888	-7.887	-7.95	2.045	-0.737	9.369	-10.954	7.32	20.302	-7.667	-12.83	3.967	3.921	12.753	1.492	5.92	-2.079	2.809	-1.281	22.077	16.526	26.216	14.186	13.205	2.222	0.12	3.79	2.226	-3.532	-4.145	-2.462	-2.768	1.661	4.058
188	-18.004	-3.697	-6.451	-26.904	2.483	-6.283	0.265	0.653	22.449	-6.958	49.182	18.537	9.652	-4.463	-11.73	-0.897	-7.761	-8.035	2.367	-0.5	9.564	-11.111	7.959	20.439	-7.5	-12.803	5.582	5.126	13.498	1.594	6.274	-2.016	2.983	-0.99	22.931	16.532	26.797	14.234	13.91	2.081	0.447	2.712	2.534	-3.186	-3.122	-2.689	-2.595	1.817	4.383
189	-18.41	-4.179	-6.31	-27.299	2.493	-6.56	0.49	0.772	22.748	-7.139	49.803	19.138	10.022	-4.26	-12.265	-0.969	-7.344	-7.924	2.803	-0.723	9.757	-11.667	8.616	21.165	-6.915	-12.629	5.822	5.189	14.009	1.732	6.379	-1.782	3.331	-1.413	23.135	16.39	26.843	14.459	12.899	2.113	0.699	3.931	3.482	-3.026	-2.274	-2.555	-1.982	1.254	4.884
190	-19.07	-3.482	-7.197	-26.99	1.392	-5.802	-0.776	0.881	22.08	-6.867	49.024	19.746	9.785	-3.624	-11.756	-0.781	-8.227	-7.705	2.364	-0.524	8.926	-11.661	7.797	21.309	-8.854	-12.807	4.962	4.759	12.745	1.989	5.622	-1.698	1.505	-1.264	22.814	16.444	25.973	14.498	11.742	2.224	0.185	2.645	2.368	-2.98	-2.177	-2.689	-2.946	1.396	4.059
191	-19.731	-5.118	-6.872	-27.441	1.008	-6.245	-0.163	0.879	22.249	-7.087	48.968	19.6	9.653	-4.023	-12.382	-1.113	-7.824	-7.431	2.661	-0.727	9.284	-11.815	7.978	20.856	-9.171	-12.926	5.208	4.669	13.44	1.785	5.768	-1.786	2.24	-0.89	22.648	16.15	26.326	14.601	12.666	1.95	0.381	2.833	2.705	-3.22	-4.368	-2.233	-2.284	1.155	4.324
192	-20.789	-4.051	-6.784	-27.925	1.074	-5.875	-0.107	0.7	22.255	-7.047	48.626	19.386	9.32	-4.244	-11.746	-0.957	-7.901	-7.683	2.55	-0.465	9.158	-11.707	8.097	20.594	-9.087	-12.878	5.329	4.797	13.697	1.855	5.569	-1.751	1.775	-0.906	23.371	16.543	26.429	14.773	13.718	2.422	0.635	3.19	2.726	-3.313	-3.007	-2.749	-2.437	1.602	4.657
193	-22.02	-2.101	-7.114	-27.835	1.11	-5.752	-0.743	1.126	22.048	-7.11	47.973	19.749	9.134	-4.343	-12.436	-0.917	-8.187	-7.818	2.57	-0.655	9.192	-11.896	7.887	20.874	-9.746	-12.783	3.986	4.183	13.67	1.64	5.334	-1.618	1.837	-1.016	22.538	16.468	26.401	14.641	12.261	2.318	0.434	4.34	2.118	-3.119	-2.831	-2.729	-2.501	1.372	4.482
194	-22.013	-2.401	-7.546	-27.61	0.842	-5.589	-0.504	1.126	22.359	-7.468	47.08	19.856	8.894	-4.245	-13.186	-0.665	-8.608	-7.661	2.402	-0.76	8.914	-11.486	7.826	21.559	-9.549	-12.697	4.034	4.584	13.346	1.865	4.972	-1.924	0.972	-0.898	23.305	16.777	26.264	14.926	11.669	2.497	0.142	3.682	2.032	-3.108	-4.255	-2.374	-2.782	1.524	4.128
195	-20.859	-3.87	-8.373	-28.07	0.223	-5.492	-1.042	1.257	21.777	-7.181	45.883	19.516	8.392	-4.259	-13.283	-0.782	-8.768	-7.967	1.674	-0.17	8.492	-11.649	7.3	21.165	-10.209	-12.692	4.039	5.378	13.575	2.021	4.372	-1.906	0.537	-0.785	22.588	16.54	25.703	15.154	11.999	2.612	-0.31	2.967	1.782	-3.105	-4.691	-2.301	-3.037	1.534	3.635
196	-22.372	-2.885	-8.132	-28.163	0.291	-5.469	-1.145	1.445	22.048	-7.468	45.778	19.101	8.58	-4.193	-13.284	-0.629	-8.742	-7.999	2.139	-0.683	8.865	-11.604	7.827	21.863	-8.989	-12.142	4.4	5.494	13.571	2.182	4.895	-2.281	1.203	-0.955	23.006	16.385	25.443	15.256	11.799	2.44	-0.364	4.163	1.778	-2.882	-3.128	-2.259	-2.868	1.367	4.387
197	-22.749	-2.373	-6.72	-28.157	2.031	-5.161	0.876	1.384	22.399	-7.174	46.421	18.802	10.23	-4.078	-11.97	-0.966	-7.626	-8.21	3.448	-0.851	10.215	-11.781	8.254	20.416	-10.975	-11.921	6.168	5.036	14.879	1.913	6.233	-2.37	2.702	-0.772	24.888	16.597	26.857	15.166	13.473	2.311	1.047	2.898	3.05	-3.023	-2.245	-2.514	-1.586	1.248	5.213
198	-21.933	-2.082	-7.517	-28.325	1.082	-5.319	0.281	1.515	21.596	-7.138	45.459	18.83	8.931	-4.461	-13.641	-0.883	-8.397	-7.961	2.887	-1.005	9.448	-11.5	7.92	21.57	-12.14	-11.472	5.495	4.854	14.18	1.829	6.02	-2.291	2.44	-0.747	23.229	16.529	26.313	14.966	12.45	2.425	-0.129	3.842	2.17	-2.641	-3.215	-2.62	-2.204	1.309	4.462
199	-22.93	-2.311	-7.412	-28.383	1.248	-5.396	-0.233	1.413	20.778	-7.045	45.216	18.242	9.332	-4.382	-13.351	-0.744	-8.713	-8.45	2.974	-0.944	9.006	-11.723	7.657	21.265	-12.34	-11.603	5.829	5.738	14.366	1.67	5.566	-2.744	1.834	-1	23.329	16.392	25.979	14.692	12.656	2.278	-0.323	3.835	1.767	-3.321	-4.033	-2.856	-2.615	1.026	4.405
200	-23.614	-1.907	-6.856	-28.361	1.541	-5.714	0.264	1.491	21.824	-7.191	45.714	18.278	9.664	-4.253	-12.889	-0.699	-8.009	-7.992	3.919	-0.997	10.31	-11.695	8.733	21.592	-11.575	-11.569	5.787	4.197	14.802	1.83	6.575	-2.409	3.88	-0.664	24.515	16.709	26.593	14.71	14.006	2.489	0.708	3.522	2.765	-2.826	-3.446	-2.577	-1.854	1.461	5.462
201	-24.265	-1.065	-7.529	-27.96	1.101	-5.36	-0.003	1.624	21.523	-7.542	44.827	17.869	9.565	-4.014	-14.045	-0.561	-8.535	-8.172	3.164	-1.047	9.65	-11.716	7.741	21.154	-12.68	-11.32	2.681	2.241	14.188	2.093	5.512	-2.33	3.49	-0.671	23.553	16.745	25.577	14.512	12.572	2.253	0.03	3.416	1.704	-2.699	-3.842	-2.456	-2.936	1.717	4.573
202	-23.412	-1.936	-7.28	-28.09	1.656	-5.111	0.134	1.918	20.656	-6.859	45.539	18.229	9.959	-3.925	-12.828	-0.874	-8.133	-8.497	3.282	-0.73	9.869	-11.783	7.836	20.346	-12.12	-10.941	3.61	3.147	14.782	2.037	6.268	-2.048	4.036	-0.788	23.913	16.739	25.481	14.438	12.591	2.302	0.136	4.538	1.613	-2.843	-3.908	-2.384	-2.483	1.797	4.679
203	-23.914	-1.257	-7.978	-28.037	0.86	-5.186	-0.926	1.976	20.6	-7.016	44.168	17.825	9.159	-3.744	-13.446	-0.374	-8.983	-8.44	2.469	-0.846	8.838	-11.435	7.519	21.406	-12.642	-10.905	2.457	3.099	13.801	1.944	5.304	-2.213	2.468	-1.178	23.851	17.045	24.952	14.617	11.433	2.506	-0.249	4.443	1.336	-2.31	-5.3	-2.445	-3.205	1.511	3.972
204	-24.66	-1.553	-7.289	-28.107	0.921	-5.373	-0.498	2.557	20.757	-7.081	44.568	17.872	10.189	-3.948	-13.909	-0.158	-8.318	-8.042	3.181	-0.821	9.776	-11.473	7.809	21.394	-12.103	-10.448	2.547	2.335	14.94	2.218	5.862	-1.753	2.079	-1.116	24.261	17.08	26.001	14.474	12.659	2.458	-0.269	3.592	1.34	-2.822	-3.458	-2.589	-2.495	1.557	4.651
205	-23.831	-0.937	-7.029	-28.094	1.6	-5.069	0.341	2.352	21.225	-7.041	44.634	17.531	9.885	-4.082	-12.773	-0.322	-8.068	-8.056	3.5	-0.518	10.256	-11.407	8.339	21.752	-11.798	-10.444	2.355	2.791	15.417	1.986	6.351	-2.335	2.966	-1.277	24.07	17.029	25.853	14.584	13.148	2.462	-0.02	4.759	1.384	-2.536	-3.061	-2.504	-2.372	1.486	4.545
206	-23.644	0.169	-7.773	-28.368	1.461	-4.616	-0.204	2.394	20.046	-7.098	44.203	17.301	9.658	-4.074	-14.716	-0.276	-8.752	-7.848	2.73	-0.423	9.568	-11.361	7.814	21.987	-12.304	-10.602	1.783	2.36	14.659	1.978	5.817	-1.99	2.276	-1.233	24.025	17.245	25.505	14.589	11.405	2.318	-0.331	3.822	0.532	-2.826	-3.863	-2.545	-2.933	1.46	4.049
207	-24.846	-0.057	-7.115	-28.746	1.667	-4.861	-0.267	2.109	20.984	-7.492	44.619	16.755	10.33	-4.423	-14.279	-0.345	-8.327	-8.115	3.665	-0.518	10.293	-11.961	8.448	21.336	-11.532	-10.77	2.015	1.44	16.002	1.717	6.72	-2.455	3.185	-1.081	24.602	17.191	25.856	14.363	13.063	2.495	0.311	3.702	1.054	-3.2	-3.274	-2.774	-2.31	1.59	4.822
208	-24.935	1.317	-6.589	-28.273	2.124	-4.273	-0.082	2.286	21.21	-6.855	45.333	16.691	11.027	-4.127	-12.954	-0.586	-7.98	-7.982	3.686	-0.325	10.114	-12.095	8.657	21.315	-11.186	-10.542	1.98	1.654	15.886	1.971	6.875	-2.118	2.907	-0.979	24.672	17.166	26.38	14.351	13.72	2.904	0.68	3.514	1.627	-2.781	-2.819	-2.805	-1.958	1.755	5.368
209	-25.362	0.35	-7.788	-28.888	1.951	-4.113	-0.653	1.959	20.26	-7.369	44.037	16.423	10.762	-3.769	-12.922	-0.673	-8.67	-7.947	2.406	-0.097	9.087	-12.254	7.995	21.64	-12.296	-10.482	2.015	2.11	15.228	1.8	6.018	-2.242	1.954	-0.975	23.601	17.093	25.939	14.561	11.859	2.48	-0.484	3.472	1.422	-2.497	-5.3	-3.069	-3.05	1.276	3.925
210	-25.688	0.697	-7.567	-28.635	2.582	-3.889	0.16	2.215	20.269	-7.181	44.059	16.348	10.101	-3.944	-14.703	-0.273	-8.865	-7.874	2.577	0.033	9.438	-12.124	8.28	22.048	-11.867	-10.457	3.379	3.346	15.142	1.936	6.547	-2.234	2.658	-0.612	24.107	17.109	26.05	14.831	11.16	2.106	-0.433	3.235	1.064	-2.367	-2.965	-2.745	-3.024	1.849	4.117
211	-25.822	-1.226	-7.027	-28.696	3.242	-3.342	0.344	2.507	20.506	-6.884	44.999	16.435	9.693	-4.545	-14.189	-0.087	-8.137	-7.788	3.237	-0.045	9.498	-11.895	8.584	22.003	-11.818	-10.409	2.402	2.123	16.048	1.761	6.908	-2.356	2.635	-0.489	24.754	17.55	26.23	15.008	11.977	2.48	0.064	4.304	0.99	-2.084	-3.167	-2.975	-2.7	1.738	4.252
212	-25.212	1.319	-7.602	-28.746	2.317	-3.589	0.68	2.317	20.297	-6.87	44.445	16.027	9.859	-4.339	-14.339	0.147	-8.41	-7.887	2.941	0.298	9.036	-11.465	8.715	22.359	-11.846	-10.332	2.22	2.494	15.655	2.008	6.399	-2.097	3.458	-0.837	24.035	17.643	25.86	15.133	11.894	2.745	-0.433	3.277	1.238	-2.178	-3.969	-2.814	-2.716	1.708	4.249
213	-25.571	-0.201	-7.995	-28.611	2.973	-2.934	0.196	2.363	20.319	-7.085	44.385	16.498	9.957	-3.973	-14.501	0.126	-8.657	-8.021	2.808	0.414	9.153	-11.216	7.999	21.743	-12.112	-10.186	2.367	3.32	15.317	2.044	6.78	-1.931	2.365	-0.59	23.683	18.059	26.18	15.909	11.558	2.334	-0.69	4.109	0.683	-2.253	-3.513	-2.986	-3.118	1.919	3.833
214	-25.993	3.029	-7.519	-29.178	3.544	-3.1	0.825	2.526	20.857	-7.457	44.613	16.012	10.113	-4.303	-14.432	-0.102	-8.157	-8.098	2.907	-0.125	9.566	-11.285	8.524	21.893	-11.862	-10.538	3.191	3.436	15.941	1.886	7.069	-2.256	3.298	-0.889	24.915	17.942	26.713	15.837	12.235	2.474	-0.445	3.807	0.754	-2.482	-3.284	-3.256	-2.431	0.866	4.272
215	-25.972	2.368	-8.274	-29.065	3.504	-2.929	0.237	2.643	19.992	-6.857	44.253	15.966	9.406	-4.227	-14.883	0.108	-8.559	-8.126	2.427	-0.315	9.227	-11.044	8.335	22.446	-12.011	-10.36	2.185	2.715	15.653	1.997	6.877	-2.174	3.104	-0.652	24.38	18.198	26.278	16.209	12.192	2.757	-0.635	3.873	0.188	-2.156	-4.399	-2.667	-2.593	1.306	3.849
216	-26.208	1.605	-7.673	-28.822	3.982	-2.86	0.588	3.045	20.699	-7.389	44.006	16.027	9.192	-4.539	-15.21	0.213	-8.156	-8.107	2.61	-0.172	9.008	-10.759	8.07	21.262	-11.775	-10.228	3.537	3.453	15.917	1.857	6.585	-2.251	3.694	-0.51	24.651	18.317	26.575	16.436	12.783	2.664	-0.624	4.405	0.324	-2.239	-3.595	-2.767	-2.497	1.461	3.905
217	-26.255	1.878	-7.786	-28.889	3.997	-2.962	1.109	2.339	20.062	-7.403	44.091	16.086	9.159	-4.871	-14.409	-0.398	-8.435	-8.023	2.56	0.018	9.139	-10.809	8.557	22.09	-11.682	-10.177	3.764	3.627	15.438	1.625	6.758	-2.823	3.284	-0.904	24.475	18.314	27.314	16.161	11.553	2.343	-0.703	4.204	0.078	-2.568	-4.897	-3.072	-2.482	1.238	3.946
218	-26.136	2.219	-8.29	-29.261	3.727	-3.074	1.042	2.691	20.023	-7.444	44.163	15.885	8.971	-4.864	-13.901	-0.135	-8.385	-8.03	2.237	-0.069	8.507	-10.378	8.362	22.268	-11.756	-10.179	4.348	4.34	15.664	1.505	6.727	-2.683	3.976	-0.987	24.784	18.192	28.294	16.695	12.238	2.226	-0.914	3.6	0.5	-1.993	-4.518	-3.099	-2.566	1.077	3.856
219	-26.955	3.155	-7.971	-29.185	4.338	-2.424	1.497	2.347	20.655	-7.753	44.332	15.85	8.464	-5.473	-14.612	-0.229	-8.456	-7.615	2.351	-0.306	8.645	-10.38	8.359	21.624	-11.83	-10.317	3.994	4.319	15.542	1.189	6.198	-2.973	3.759	-0.569	24.504	18.26	28.275	16.69	11.386	2.427	-0.944	3.688	0.332	-2.332	-4.307	-3.221	-2.681	0.941	4.035
220	-25.212	5.267	-8.083	-29.155	4.287	-2.404	1.848	2.547	20.651	-7.669	44.355	16.029	9.44	-4.968	-15.66	0.028	-8.29	-7.504	2.085	-0.062	8.701	-10.143	8.408	22.162	-11.6	-10.074	3.33	3.796	15.786	1.413	6.138	-2.706	3.8	-0.6	25.453	18.403	28.872	17.06	11.53	2.438	-0.847	4.09	0.64	-2.075	-4.647	-3.157	-2.461	0.794	3.704
221	-26.227	3.367	-8.089	-28.912	3.845	-2.171	1.638	2.697	20.595	-7.711	43.818	15.965	8.553	-5.302	-16.212	-0.084	-8.509	-8.03	1.576	-0.037	8.066	-9.831	8.052	22.135	-11.932	-10.048	3.63	4.413	15.566	1.266	5.997	-2.642	3.723	-0.695	24.536	18.322	28.658	16.573	12.214	2.502	-0.934	4.413	0.326	-2.296	-4.762	-3.275	-2.464	0.699	3.399
222	-25.944	4.671	-7.004	-28.59	5.21	-2.259	3.15	2.501	21.204	-7.029	45.287	16.068	9.426	-5.263	-15.272	-0.102	-7.285	-7.562	2.562	-0.06	8.951	-9.592	9.257	22.457	-10.98	-10.148	5.463	4.724	16.589	1.465	7.305	-2.602	5.233	-0.833	26.035	18.385	30.284	16.688	12.787	2.276	-0.096	3.941	1.017	-2.347	-3.797	-3.066	-1.451	0.953	4.942
223	-27.011	4.748	-8.017	-28.801	4.881	-2.237	1.636	1.99	20.873	-7.477	43.834	15.954	9.226	-5.145	-15.609	0.177	-8.544	-7.902	1.42	0.057	8.095	-9.844	7.894	21.613	-11.682	-9.93	4.846	4.929	16.23	1.21	6.166	-2.331	3.732	-0.631	24.923	18.385	29.09	16.184	11.953	2.338	-0.941	4.257	0.006	-2.653	-4.411	-3.037	-2.361	0.377	3.938
224	-25.971	4.557	-7.703	-28.965	5.342	-1.734	2.536	2.343	21.005	-7.274	44.348	16.202	9.552	-5.651	-15.095	0.204	-8.189	-7.95	1.714	-0.342	8.468	-9.577	8.651	22.395	-11.195	-9.591	4.35	4.022	16.432	1.328	6.447	-1.987	4.237	-0.922	25.951	18.898	29.617	16.367	12.856	2.217	-0.932	4.732	0.252	-2.373	-2.904	-3.206	-2.318	0.862	4.649
225	-25.384	5.261	-8.532	-29.04	4.38	-1.615	1.69	2.481	19.943	-7.383	43.559	16.167	8.521	-5.81	-15.955	-0.226	-9.117	-8.162	0.77	-0.326	7.728	-9.662	7.528	21.936	-12.261	-9.684	2.877	3.479	15.574	1.146	5.566	-1.71	3.511	-1.099	24.683	18.695	28.731	16.049	11.092	2.026	-1.758	3.869	-0.657	-2.819	-4.408	-3.355	-2.851	0.45	3.622
226	-26.351	6.017	-7.754	-29.455	5.738	-1.298	2.123	2.474	20.306	-7.544	44.713	15.759	9.28	-5.951	-15.632	-0.08	-8.155	-8.039	1.735	-0.392	8.404	-9.652	8.299	21.82	-11.425	-9.972	5.131	4.578	16.864	1.308	6.143	-2.071	4.201	-1.336	25.324	18.656	30.052	15.93	11.755	2.018	-1.106	4.041	0.133	-3.274	-4.404	-3.532	-1.714	-0.101	4.608
227	-26.493	8.224	-7.495	-29.461	6.194	-1.319	2.847	2.36	20.398	-7.251	45.093	15.905	9.415	-5.911	-14.777	0.006	-7.861	-8.212	2.011	-0.46	8.708	-9.532	8.588	21.976	-11.147	-9.63	4.203	3.607	16.951	1.011	6.391	-1.89	5.417	-1.303	26.356	18.878	30.498	16.004	12.819	2.163	-0.939	3.668	0.281	-3.042	-2.921	-3.343	-1.753	0.294	5.014
228	-26.549	8.725	-8.529	-29.573	5.468	-1.322	2.567	2.626	19.703	-7.33	43.924	15.793	8.386	-6.1	-15.847	-0.392	-8.803	-8.301	0.833	-0.128	7.591	-9.608	7.453	21.783	-12.108	-9.669	3.699	3.708	16.071	1.059	5.536	-2.034	5.375	-0.94	24.517	18.791	29.055	15.873	11.571	1.924	-1.713	4.295	-0.843	-3.095	-4.274	-3.48	-2.55	0.011	4.027
229	-24.814	7.948	-8.656	-29.554	5.376	-1.153	2.56	2.338	19.212	-7.5	43.116	15.905	8.239	-6.181	-16.438	-0.013	-9.148	-8.255	0.684	-0.361	7.362	-9.601	7.254	21.953	-12.476	-9.737	3.886	3.74	15.872	1.102	5.46	-2.305	4.155	-0.931	24.985	19.313	28.682	16.13	11.034	2.228	-1.88	4.404	-1.075	-2.794	-4.475	-3.462	-2.765	-0.026	3.869
230	-23.947	9.524	-8.818	-29.471	5.495	-1.446	2.183	2.358	18.674	-7.458	42.432	15.389	7.892	-6.409	-15.891	-0.66	-9.536	-8.595	0.522	-0.656	7.245	-9.719	6.873	21.483	-12.719	-9.822	3.209	2.952	15.799	1.155	5.328	-2.514	3.624	-1.459	24.286	18.867	28.734	16.015	10.959	1.597	-2.308	4.279	-1.212	-3.252	-5.052	-3.723	-2.859	-0.125	3.57
231	-23.754	10.544	-7.978	-29.167	6.734	-1.439	3.426	2.878	19.672	-7.169	43.135	15.772	8.802	-6.703	-15.991	0.333	-8.469	-8.376	1.455	-0.372	8.227	-9.449	8.311	22.557	-11.676	-9.463	3.119	2.612	16.905	1.101	6.35	-2.57	4.434	-1	25.475	19.26	29.965	16.393	12.955	1.943	-1.153	4.677	-0.515	-2.763	-3.904	-3.251	-1.689	-0.219	4.739
232	-23.646	11.125	-7.825	-29.458	7.126	-1.389	3.389	3.176	19.802	-7.418	43.506	15.817	9.284	-6.481	-16.125	0.397	-7.938	-8.573	1.804	-0.324	8.122	-9.41	8.474	22.545	-11.45	-9.401	2.93	2.185	17.15	1.257	6.71	-2.885	4.727	-1.15	25.534	19.135	29.846	16.397	12.637	1.944	-1.008	4.582	0.019	-2.888	-4.141	-3.345	-1.593	-0.307	4.985
233	-22.684	11.141	-8.317	-29.417	7.017	-1.443	3.081	3.129	18.913	-7.529	42.535	15.704	9.034	-6.702	-17.091	0.27	-8.561	-8.273	1.414	-0.689	7.6	-9.403	8.297	22.76	-11.835	-9.474	1.932	1.611	16.726	1.12	6.283	-2.645	5.352	-0.606	25.712	19.028	29.581	16.583	11.336	1.6	-1.611	4.21	-0.791	-2.849	-4.156	-3.644	-1.886	-0.541	4.58
234	-21.961	12.412	-8.63	-29.507	7.035	-1.579	2.957	3.275	19.262	-7.477	42.103	15.783	8.526	-6.439	-16.898	0.12	-9.017	-8.154	1.418	-0.467	7.439	-9.147	8.086	23.488	-11.682	-9.468	0.92	0.996	16.378	1.106	6.215	-2.595	4.493	-0.948	25.514	18.962	29.246	16.723	11.267	1.805	-1.623	5.063	-0.485	-2.796	-3.958	-3.397	-2.01	-0.254	4.302
235	-22.566	12.848	-8.773	-29.665	7.727	-1.332	3.509	3.215	19.472	-7.672	42.17	15.759	8.807	-6.581	-16.339	0.204	-8.818	-8.584	1.552	-0.811	7.425	-9.143	8.314	23.169	-11.905	-9.645	1.039	0.736	16.874	0.962	6.603	-2.737	4.042	-0.987	25.609	18.979	29.761	16.405	11.468	1.545	-1.673	4.734	-0.324	-2.968	-4.302	-3.692	-2.192	-0.062	4.23
236	-19.544	14.726	-8.346	-29.897	8.263	-1.39	3.509	3.048	19.572	-7.815	42.968	15.248	9.487	-6.606	-15.799	-0.128	-8.164	-8.894	2.188	-0.8	7.988	-9.091	8.889	23.215	-11.387	-9.445	1.836	0.877	17.697	0.887	7.276	-3.123	3.349	-1.328	26.398	19.246	30.433	16.297	12.67	1.493	-1.106	5.218	0.191	-2.944	-3.79	-3.695	-1.598	-0.297	4.915
237	-20.908	14.551	-9.366	-29.724	7.46	-1.197	3.004	3.165	18.111	-7.446	41.589	15.336	8.509	-6.719	-16.56	-0.052	-9.309	-9.041	0.97	-0.636	6.631	-8.612	7.831	23.513	-12.561	-9.437	0.654	0.881	16.372	1.096	6.032	-2.794	3.02	-0.97	24.942	19.334	29.251	16.316	11.43	1.822	-2.109	5.386	-1.003	-3.102	-4.029	-3.498	-2.737	-0.148	3.885
238	-19.756	14.663	-8.321	-29.813	9.127	-1.191	3.314	3.708	19.094	-7.437	42.801	15.09	9.355	-6.862	-16.098	-0.045	-8.137	-9.12	2.254	-0.822	8.045	-8.616	9.113	23.595	-11.518	-9.38	0.966	0.284	17.682	0.947	7.676	-2.966	4.018	-1.16	26.155	19.397	30.413	16.306	13.132	1.784	-1.171	5.498	0.026	-3.229	-3.415	-3.732	-1.483	-0.249	4.753
239	-20.228	16.373	-9.477	-30.051	8.126	-1.022	1.873	3.719	18.72	-8.165	41.972	15.057	8.508	-6.972	-16.474	-0.13	-9.204	-9.032	1.042	-0.465	7.009	-8.366	7.669	23.531	-12.556	-9.159	-0.014	0.307	16.627	1.07	6.041	-2.869	4.083	-0.649	25.211	19.52	29.446	16.347	11.494	1.709	-2.168	5.301	-1.063	-3.051	-4.159	-3.537	-2.491	-0.327	3.688
240	-19.422	17.068	-9.296	-29.9	8.399	-0.969	2.183	3.936	18.93	-8.075	42.227	15.035	8.518	-7.066	-18.373	0.443	-9.286	-9.111	1.382	-0.418	6.984	-7.956	8.185	23.733	-12.28	-9.287	0.653	1.154	16.835	1.146	6.395	-2.654	3.67	-0.787	25.028	19.506	29.436	16.397	11.459	1.732	-2.078	6.437	-0.877	-2.903	-3.912	-3.851	-2.439	-0.109	3.781
241	-17.87	16.037	-10.079	-29.686	8.166	-0.922	1.946	3.947	17.989	-7.644	41.279	14.891	8.008	-6.998	-17.812	0.1	-10.012	-8.986	0.959	-0.331	6.209	-7.798	7.734	24.112	-12.776	-9.101	1.042	2.233	16.298	1.249	5.823	-2.679	3.979	-0.59	24.531	19.676	28.852	16.343	11.294	1.747	-2.627	6.059	-1.513	-3.182	-5.137	-3.753	-3.176	0.26	3.209
242	-17.265	17.018	-9.867	-29.699	8.405	-0.843	1.482	3.941	17.742	-7.715	41.284	14.449	7.995	-6.963	-18.947	0.251	-9.958	-9.356	0.855	-0.274	6.297	-7.519	7.851	23.976	-12.812	-9.081	1.807	3.203	16.383	1.02	5.939	-2.591	3.074	-0.76	23.943	19.927	28.733	16.408	11.114	1.638	-2.274	6.199	-1.563	-3.167	-4.6	-3.765	-3.003	0.239	3.135
243	-17.047	19.179	-9.32	-29.824	9.518	-0.96	2.234	3.753	18.617	-8.094	42.035	14.314	8.263	-7.471	-18.024	0.415	-9.403	-9.394	1.742	-0.598	7.032	-7.299	8.111	23.563	-12.314	-9.148	2.8	3.41	17.189	0.885	6.953	-2.905	3.121	-1.046	25.202	19.692	29.688	16.431	11.37	1.435	-1.928	7.05	-1.137	-3.555	-4.159	-3.78	-2.457	0.023	3.69
244	-16.633	19.149	-9.08	-29.604	10.033	-1.035	3.193	3.913	19.026	-8.262	42.168	14.306	9.279	-7.156	-17.713	0.138	-9.007	-9.536	1.92	-0.869	7.297	-6.954	8.688	23.69	-11.805	-9.276	3.197	3.461	17.749	0.84	7.141	-3.013	3.924	-1.016	25.389	19.693	29.958	16.507	11.902	1.204	-1.52	6.425	-1.078	-3.843	-3.685	-4.046	-2.206	0.125	4.024
245	-16.667	19.067	-9.022	-29.523	10.461	-1.084	3.133	3.928	18.884	-8.198	41.67	14.46	8.871	-7.661	-18.05	0.336	-9.103	-9.396	1.745	-0.397	7.369	-6.387	8.61	23.643	-11.948	-9.246	2.963	3.623	17.564	1.182	6.772	-3.155	4.289	-0.89	25.969	19.85	29.989	16.74	12.233	1.327	-1.882	6.358	-0.59	-3.424	-2.697	-3.767	-2.281	0.353	4.126
246	-15.971	18.933	-9.381	-29.707	10.513	-1.097	3.433	3.992	18.723	-8.213	41.272	14.482	8.72	-7.63	-18.063	0.122	-9.113	-9.35	1.973	-0.374	7.361	-6.114	8.642	24.079	-12.137	-9.128	2.941	3.453	17.781	1.045	6.859	-3.15	4.111	-0.933	25.845	20.055	30.104	16.834	12.389	1.384	-1.704	6.089	-0.951	-3.706	-3.48	-3.988	-2.383	0.249	3.801
247	-16.793	20.143	-9.891	-29.523	10.372	-1.217	2.95	4.143	17.762	-7.805	40.793	14.501	8.872	-7.224	-18.812	0.266	-9.478	-9.022	1.703	-0.06	6.793	-5.694	8.156	24.165	-12.549	-9.083	2.121	2.813	17.612	0.983	6.241	-3.035	3.341	-0.972	25.164	20.134	30.069	16.781	11.688	1.437	-2.339	6.692	-1.248	-3.307	-3.762	-3.94	-2.806	0.391	3.44
248	-15.537	19.288	-9.375	-29.367	11.337	-1.384	3.128	4.246	18.576	-8.096	41.48	14.341	9.392	-7.443	-18.535	0.351	-8.878	-8.98	2.405	-0.113	7.229	-5.59	8.729	24.002	-11.686	-8.775	3.007	3.554	18.667	0.962	6.716	-2.814	3.457	-0.812	26.031	20.287	30.567	16.938	11.907	1.454	-1.679	6.322	-0.241	-3.179	-3.046	-4.288	-2.124	0.543	3.928
249	-15.108	20.565	-10.592	-29.194	10.515	-1.419	2.404	4.538	17.803	-7.917	40.556	14.333	8.521	-7.155	-19.713	0.707	-9.753	-8.929	1.379	0.029	6.383	-4.973	7.939	24.681	-12.9	-8.621	2.37	4.295	18.026	0.97	5.923	-2.69	2.718	-0.452	24.945	20.423	29.849	17.144	10.809	1.686	-2.633	6.621	-1.105	-2.897	-4.075	-3.859	-3.355	0.892	3.122
250	-14.394	19.111	-9.65	-29.025	11.871	-1.371	3.927	4.203	18.694	-8.262	41.544	14.441	9.384	-7.375	-18.644	0.615	-8.516	-9.173	2.437	-0.15	7.095	-4.71	9.069	24.646	-11.811	-8.768	3.362	4.17	18.993	0.89	6.849	-3.303	3.579	-0.664	26.02	20.423	31.169	16.741	11.262	1.284	-1.737	6.34	0.084	-3.032	-4.192	-3.963	-2.38	0.655	3.943
251	-14.675	20.82	-9.588	-28.856	12.047	-1.572	3.662	4.108	18.837	-8.33	40.798	14.498	9.719	-7.448	-18.991	0.207	-8.689	-8.797	2.52	-0.191	7.325	-4.439	8.627	23.909	-11.802	-8.883	3.289	3.854	19.32	0.798	7.023	-3.293	3.439	-0.57	26.148	20.477	31.277	16.521	11.862	1.189	-1.847	6.339	-0.196	-3.174	-3.492	-4.027	-2.448	0.831	3.651
252	-15.085	22.618	-9.732	-29.143	12.477	-1.601	3.778	3.673	18.817	-8.292	40.413	14.875	9.873	-7.594	-18.987	0.161	-8.501	-9.016	2.514	-0.09	7.731	-4.338	8.972	24.554	-11.744	-8.784	3.481	3.423	19.286	0.869	6.859	-3.365	4.257	-0.665	25.89	20.296	31.452	16.399	11.859	1.214	-1.539	6.559	-0.182	-3.241	-3.955	-4.088	-2.154	0.612	3.772
253	-13.782	21.945	-10.266	-29.244	11.877	-1.82	3.505	3.645	17.959	-8.238	38.994	14.898	8.99	-7.566	-20.156	0.1	-9.315	-9.293	1.87	-0.221	7.09	-4.256	8.231	24.134	-12.515	-8.767	2.846	3.574	19.042	0.625	6.405	-3.415	3.192	-0.587	25.268	20.252	30.915	16.448	11.159	1.133	-2.294	6.473	-0.899	-3.401	-3.964	-4.266	-2.847	0.701	3.153
254	-13.083	23.69	-10.799	-29.166	11.555	-2.03	4.218	3.438	17.59	-8.422	38.282	14.981	8.662	-7.599	-21.217	0.238	-9.642	-9.333	1.192	0.104	6.872	-3.916	7.96	24.744	-12.715	-8.789	2.475	3.569	18.788	0.757	5.957	-3.475	1.792	-0.753	24.822	20.267	30.037	16.632	9.58	0.981	-2.627	6.71	-1.565	-3.705	-5.514	-4.464	-3.339	0.777	2.49
255	-12.871	24.842	-9.889	-29.151	12.753	-1.835	5.155	3.501	17.956	-7.936	38.48	14.735	9.456	-7.609	-20.891	0.273	-8.927	-8.92	2.202	0.19	7.342	-3.529	9.108	25.138	-11.605	-8.37	3.615	3.991	19.607	0.835	6.717	-3.496	3.561	-0.65	25.556	20.488	31.156	16.692	10.805	1.156	-1.475	7.62	-0.781	-3.612	-4.305	-4.339	-2.527	0.864	3.409
256	-12.797	26.768	-9.759	-28.841	13.234	-1.894	5.28	3.527	18.108	-8.027	38.642	14.485	9.364	-7.766	-20.629	0.506	-8.539	-9.041	2.517	-0.05	7.902	-3.275	9.252	25.279	-11.45	-8.359	3.55	3.653	19.958	1.021	7.083	-3.591	2.643	-0.534	25.83	20.593	31.218	16.846	11.162	1.382	-1.227	8.139	-0.496	-3.352	-3.634	-4.144	-2.608	1.191	3.695
257	-12.564	27.645	-9.926	-28.901	13.071	-2.162	5.501	3.395	17.959	-8.09	38.315	14.176	9.835	-7.446	-20.789	0.458	-8.57	-9.317	2.213	0	7.386	-3.131	8.594	24.007	-11.659	-8.37	3.19	3.65	19.971	0.962	6.511	-3.585	2.604	-0.989	25.45	20.61	31.015	16.534	11.442	1.162	-1.599	7.604	-0.606	-3.36	-3.504	-4.345	-2.323	0.788	3.472
258	-11.37	26.372	-10.368	-28.53	12.686	-2.123	4.739	3.65	17.198	-7.945	37.809	13.926	9.293	-7.416	-21.71	0.535	-9.461	-9.02	1.593	0.395	6.892	-2.798	8.393	24.641	-12.08	-8.547	2.818	3.622	19.421	1.126	6.186	-3.606	1.927	-1.067	25.387	20.61	30.541	17.071	11.296	1.696	-2.016	8.326	-0.717	-3.167	-4.66	-4.264	-3.057	1.076	2.872
259	-10.444	28.376	-10.401	-28.734	12.64	-2.428	4.431	3.37	17.243	-8.528	37.353	13.359	9.422	-7.721	-21.966	0.509	-9.395	-9.109	1.286	-0.181	6.627	-2.957	8.315	24.892	-11.981	-8.353	2.248	2.99	19.254	1.02	6.222	-3.688	1.975	-1.055	25.295	20.497	30.316	17.08	11.107	1.135	-2.051	8.444	-1.425	-3.7	-4.797	-4.395	-3.143	0.884	2.637
260	-10.444	30.651	-9.895	-28.923	13.499	-2.46	5.549	3.346	17.745	-8.394	37.912	13.213	9.584	-7.903	-22.383	0.445	-8.999	-9.086	1.857	-0.309	7.302	-2.765	8.833	24.74	-11.111	-8.402	2.784	2.958	20.042	0.878	6.642	-3.538	2.633	-1.093	25.564	20.573	31.539	17.328	11.306	1.225	-1.196	7.922	-1.227	-3.939	-3.469	-4.303	-2.479	0.918	3.265
261	-9.719	34.791	-9.656	-29.028	13.839	-2.442	5.953	3.143	17.853	-8.226	38.288	13.131	10.006	-7.751	-22.506	0.516	-8.51	-9.028	1.852	-0.299	7.37	-2.646	9.206	25.081	-10.715	-8.314	3.159	3.026	20.348	0.991	6.837	-3.377	3.6	-0.83	26.167	20.523	31.743	17.295	11.55	1.105	-1.28	8.038	-0.616	-4.087	-2.89	-4.316	-2.408	1.064	3.4
262	-11.84	31.705	-9.945	-28.958	13.505	-2.271	5.633	3.188	17.719	-8.132	37.597	12.31	9.394	-7.833	-22.113	0.508	-8.516	-8.904	1.567	-0.299	6.96	-2.52	9.345	25.691	-10.735	-7.948	3.04	3.263	20.317	1.074	6.648	-3.305	3.286	-0.889	25.817	20.559	31.439	17.488	11.455	1.277	-1.309	7.613	-1.001	-3.769	-3.012	-4.38	-2.495	1.188	3.178
263	-11.156	33.459	-9.385	-28.855	13.97	-2.114	5.816	3.276	17.799	-8.182	37.942	12.017	9.77	-7.685	-21.707	0.329	-8.229	-9.034	1.82	-0.345	7.388	-2.159	9.649	26.074	-10.194	-7.951	3.285	3.523	20.823	1.197	6.828	-3.339	2.718	-0.93	26.175	20.579	32.237	17.127	10.839	1.117	-1.058	7.964	-0.468	-3.511	-2.819	-4.264	-2.022	1.105	3.63
264	-11.321	35.273	-9.952	-28.604	13.75	-1.917	5.154	3.316	17.246	-8.252	36.899	11.99	9.396	-7.622	-22.69	0.397	-8.665	-9.183	1.137	-0.477	6.857	-1.933	8.713	25.074	-10.709	-7.858	2.715	3.58	19.632	1.203	6.268	-3.169	2.899	-1.007	25.506	20.709	31.796	17.476	10.863	1.152	-1.907	8.524	-0.974	-3.611	-3.661	-4.233	-2.596	1.3	3.203
265	-10.356	35.322	-10.088	-28.526	13.462	-2.225	4.628	3.319	16.894	-8.524	36.13	11.497	9.363	-7.617	-22.498	0.247	-8.847	-9.233	0.722	-0.525	6.888	-1.568	8.626	25.503	-10.657	-7.868	2.305	3.584	19.473	1.324	5.937	-3.059	2.757	-0.931	25.433	20.517	31.859	17.658	10.228	1.12	-1.944	8.637	-1.297	-3.527	-2.71	-4.087	-2.773	0.978	2.88
266	-9.964	35.922	-9.946	-28.588	13.756	-2.258	4.921	3.625	17.157	-8.251	36.537	11.243	9.509	-7.502	-22.663	0.493	-8.66	-8.855	1.027	-0.428	7.228	-0.973	9.125	25.7	-10.687	-7.657	2.362	3.426	20.054	1.53	6.277	-2.96	3.116	-1.131	25.974	20.684	32.418	17.822	11.017	1.431	-1.63	8.484	-0.779	-3.59	-2.193	-4.113	-2.476	1.233	3.242
267	-9.614	35.264	-10.538	-28.713	12.997	-2.337	3.669	3.727	16.266	-8.29	35.499	11.113	8.75	-7.716	-23.868	0.441	-9.295	-9.066	0.228	-0.594	6.517	-1.007	8.549	25.888	-11.42	-7.604	1.93	3.304	19.517	1.232	5.74	-2.985	1.948	-1.338	25.183	20.536	31.66	17.799	10.105	0.992	-2.124	8.735	-1.507	-3.297	-3.612	-4.144	-3.306	1.307	2.685
268	-9.129	35.814	-10.184	-28.937	13.814	-2.597	4.037	3.381	16.512	-8.334	35.541	10.877	9.032	-7.664	-23.36	0.31	-9.172	-8.901	0.317	-0.932	6.79	-0.773	8.874	25.879	-11.119	-7.703	1.76	3.257	19.897	1.223	5.853	-2.97	2.394	-1.28	26.047	20.605	31.833	17.513	10.121	1.196	-1.766	9.045	-1.444	-3.627	-3.803	-4.114	-3.128	1.359	3.089
269	-8.89	35.778	-10.414	-28.915	14.003	-2.975	5.034	3.479	16.347	-8.403	35.548	10.553	9.372	-7.382	-23.257	0.36	-9.164	-8.898	0.3	-0.858	7.019	-0.751	8.767	25.697	-11.265	-7.824	1.896	3.578	19.544	1.22	5.769	-2.872	2.916	-1.32	26.275	20.656	31.908	17.593	10.446	1.25	-1.849	8.402	-1.284	-3.644	-4.187	-4.249	-3.066	1.365	2.812
270	-9.242	36.457	-10.268	-29.077	14.709	-3.356	4.807	3.41	16.349	-8.436	36.258	10.313	9.358	-7.732	-23.353	0.306	-8.989	-9.154	0.181	-1.138	7.518	-0.731	8.957	25.452	-11.284	-8.156	1.908	3.611	19.803	1.206	6.057	-2.844	3.229	-1.43	26.311	20.688	31.994	17.653	10.315	1.154	-1.885	8.07	-1.599	-3.712	-3.47	-4.279	-3.05	1.248	3.316
271	-8.681	36.337	-10.196	-29.2	14.817	-3.439	5.04	3.584	15.676	-7.999	35.713	10.162	9.572	-7.707	-23.309	0.358	-9.209	-9.245	0.004	-1.121	7.459	-0.74	8.627	25.335	-11.203	-8.015	1.788	3.263	20.077	1.109	6	-2.836	2.135	-1.515	26.8	20.609	31.754	17.556	10.549	1.062	-1.633	8.754	-1.932	-3.857	-3.96	-4.376	-3.207	1.357	3.204
272	-9.494	38.071	-10.423	-28.876	14.936	-3.273	4.619	3.881	16.221	-8.526	35.313	10.357	9.52	-7.639	-23.558	-0.005	-9.476	-9.107	-0.388	-1.149	7.803	-0.378	8.676	25.321	-11.142	-7.846	1.565	3.153	20.118	1.161	5.929	-2.741	1.774	-1.48	26.384	20.757	31.55	17.88	10.243	1.115	-2.088	8.975	-1.622	-3.768	-4.482	-4.208	-3.279	1.383	3.177
273	-9.007	37.401	-10.961	-28.99	14.3	-3.376	4.074	4.27	15.841	-8.216	34.274	10.339	9.928	-7.329	-23.761	0.039	-10.016	-9.041	-1.106	-0.839	7.483	-0.303	8.731	26.233	-11.773	-7.806	1.009	3.043	19.807	1.326	5.408	-2.286	2.146	-1.213	26.02	20.881	30.769	18.122	10.265	1.115	-2.45	8.925	-2.604	-3.99	-5.208	-4.111	-3.532	1.373	2.552
274	-7.694	38.886	-10.408	-29.014	14.645	-3.382	4.978	4.12	15.648	-7.952	34.661	10.338	10.294	-7.373	-23.366	0.075	-9.413	-8.988	-0.343	-0.603	7.989	-0.327	9.159	26.302	-11.165	-7.784	1.822	3.187	20.514	1.391	6.063	-2.083	3.183	-1.016	26.934	20.722	31.153	18.192	10.321	1.237	-1.807	8.698	-1.664	-3.867	-4.501	-4.064	-3.116	1.594	3.029
275	-7.123	36.794	-11.29	-29.217	14.262	-3.511	4.736	4.118	15.252	-8.247	33.678	9.915	9.358	-7.671	-23.822	-0.027	-10.125	-8.932	-1.357	-0.765	7.391	-0.312	8.488	26.186	-11.94	-8.034	1.103	3.294	19.864	1.295	5.275	-2.031	2.449	-1.123	26.779	20.814	30.523	18.29	9.949	1.476	-2.548	8.348	-2.875	-3.955	-5.362	-4.086	-4.096	1.733	2.325
276	-8.026	39.235	-11	-29.008	14.759	-3.253	4.586	4.528	15.05	-8.241	33.849	9.77	9.681	-7.626	-24.213	0.228	-10.05	-8.679	-1.002	-0.648	7.543	-0.022	8.876	26.605	-11.802	-7.938	1.12	3.483	19.834	1.347	5.593	-1.513	1.819	-1.03	26.706	20.692	30.274	18.448	10.444	1.697	-2.298	8.345	-2.051	-3.757	-4.641	-4.07	-3.685	1.561	2.476
277	-7.897	39.518	-10.176	-29.022	15.808	-2.717	5.366	4.479	15.442	-8.018	34.311	9.312	10.618	-7.362	-25.219	1.182	-9.459	-8.498	-0.405	-0.554	8.168	-0.034	9.302	26.277	-11.266	-7.574	1.951	3.781	20.885	1.513	6.268	-1.153	2.949	-1.094	27.36	20.857	30.573	18.805	10.956	1.742	-1.484	8.816	-1.493	-3.638	-4.393	-4.202	-3.302	1.993	3.333
278	-7.444	40.066	-10.173	-29.113	15.584	-3.475	6.246	4.596	15.28	-8.377	34.361	8.954	10.615	-7.802	-27.648	1.899	-9.334	-9.11	-0.613	-0.6	8.479	-0.128	9.449	25.802	-11.099	-7.636	1.743	3.046	20.792	1.286	6.668	-1.308	2.533	-1.417	27.654	20.647	30.443	18.939	11.014	1.268	-1.525	9.054	-2.145	-4.084	-5.191	-4.409	-3.175	1.696	3.255
279	-7.49	39.362	-11.02	-28.683	15.647	-2.914	5.124	4.81	14.435	-8.168	33.344	8.655	9.719	-7.733	-30.425	2.633	-10.057	-8.784	-1.48	-0.498	7.441	0.089	8.556	25.998	-11.949	-7.924	1.049	3.207	20.135	1.502	5.535	-1.314	1.487	-1.358	27.08	20.706	29.969	19.354	10.222	1.548	-2.193	8.862	-2.694	-3.933	-5.097	-4.258	-4.201	1.968	2.501
280	-7.481	40.651	-10.706	-28.857	15.757	-3.174	5.204	5.123	14.848	-8.278	33.738	8.746	10.586	-7.46	-32.212	2.743	-9.562	-8.68	-1.134	-0.357	8.018	0.013	9.35	26.425	-11.734	-8.037	1.362	3.157	20.899	1.524	5.746	-1.05	1.546	-1.353	27.734	20.588	29.843	19.261	9.941	1.326	-1.755	8.597	-2.021	-4.001	-4.85	-4.172	-3.771	2.21	3.065
281	-7.889	38.83	-10.179	-29.062	15.766	-3.4	5.578	5.159	15.315	-8.667	33.123	8.205	10.598	-7.593	-32.051	2.381	-9.455	-8.85	-0.969	-0.289	8.488	-0.228	9.585	26.16	-11.077	-7.933	1.676	3.229	21.254	1	5.972	-1.066	1.278	-1.405	28.179	20.527	30.039	19.362	10.091	1.39	-1.515	8.912	-1.873	-4.09	-3.611	-4.346	-3.41	1.907	3.327
282	-7.825	37.627	-10.786	-29.039	15.381	-3.395	4.923	5.128	14.749	-8.548	32.453	7.835	9.91	-7.706	-32.514	2.338	-9.807	-8.545	-1.279	-0.007	7.998	0.008	9.343	27.224	-11.797	-7.958	1.039	3.241	20.809	1.451	5.371	-0.949	0.937	-1.452	27.683	20.755	29.665	19.423	10.54	1.505	-2.161	8.217	-2.375	-4.093	-4.702	-4.21	-3.785	2.008	2.577
283	-9.645	37.216	-10.527	-28.676	15.635	-3.221	5.251	5.67	14.521	-7.97	32.7	7.704	10.442	-7.541	-30.982	2.395	-9.614	-8.296	-0.993	0.134	8.359	0.176	9.523	27.071	-11.453	-7.495	1.204	3.406	21.643	1.469	5.448	-0.658	1.813	-1.088	27.916	20.832	29.914	19.428	10.324	1.6	-1.792	8.996	-2.095	-3.868	-4.833	-4.147	-3.692	2.456	2.489
284	-10.951	39.341	-10.703	-28.55	15.733	-3.266	5.07	5.718	13.976	-7.688	31.77	7.345	10.56	-7.503	-31.103	2.532	-9.772	-8.201	-1.247	0.107	8.151	0.304	9.404	27.132	-11.62	-7.827	1.325	3.601	21.207	1.609	5.094	-0.16	0.701	-1.384	27.843	21.004	29.481	19.038	10.436	1.778	-2.008	8.91	-2.226	-4.132	-5.041	-4.141	-4.044	2.36	2.408
285	-10.862	37.365	-10.456	-28.655	15.841	-3.283	5.169	5.795	14.601	-8.176	31.327	6.879	10.423	-7.671	-31.166	2.657	-9.849	-8.507	-1.508	0.578	8.194	0.314	9.422	26.981	-11.831	-7.744	1.441	3.868	21.225	1.737	5.148	-0.348	1.418	-1.053	27.854	20.956	29.712	18.447	10.195	1.388	-2.071	9.224	-2.568	-4.134	-4.811	-4.253	-4.06	2.175	2.128
286	-10.268	36.536	-9.887	-28.824	16.606	-3.5	5.275	5.684	14.944	-8.07	31.317	6.304	11.895	-7.743	-30.344	2.306	-9.387	-8.552	-1.164	0.69	8.871	0.526	10.038	26.84	-11.245	-7.931	1.957	3.558	22.09	1.639	5.482	-0.492	1.961	-1.447	28.506	20.788	30.527	18.02	11.469	1.203	-1.24	8.863	-2.637	-4.369	-4.511	-4.203	-3.493	2.013	2.771
287	-10.794	38.597	-10.561	-29.099	15.836	-3.834	4.789	5.528	14.868	-8.392	30.554	5.521	11.378	-7.953	-31.036	1.889	-10.071	-8.678	-1.797	0.558	8.377	0.217	9.698	26.923	-11.765	-8.103	1.754	3.314	21.513	1.536	4.998	-0.92	1.386	-1.457	27.514	20.749	30.101	17.662	10.998	0.993	-1.652	8.874	-2.964	-4.643	-3.754	-4.54	-3.682	1.65	2.275
288	-10.626	37.447	-11.021	-29.117	15.725	-3.418	3.992	5.64	14.236	-8.72	29.337	4.96	10.411	-7.953	-32.017	1.066	-10.609	-8.397	-2.192	0.604	7.635	0.069	9.05	26.739	-12.416	-8.034	1.072	3.586	20.734	1.747	4.461	-0.783	1.077	-1.341	27.345	20.961	29.747	17.863	9.725	0.838	-2.335	9.12	-3.799	-4.686	-5.545	-4.497	-4.84	2.291	1.562
289	-11.392	38.211	-11.101	-29.305	15.733	-3.448	4.019	5.905	14.062	-8.453	29.034	4.566	10.223	-8.254	-33.088	0.979	-10.985	-8.38	-2.173	0.597	7.552	0.05	8.991	27.168	-12.562	-7.811	0.788	3.253	20.648	1.812	4.411	-0.741	1.215	-1.096	27.739	21.142	29.946	17.36	10.132	0.999	-2.246	9.388	-4.009	-5.11	-5.736	-4.403	-4.838	2.409	1.371
290	-12.166	38.265	-10.443	-29.05	16.623	-3.301	4.852	5.753	14.723	-8.496	28.651	4.133	11.118	-8.116	-32.318	0.824	-10.273	-8.239	-1.734	0.524	8.141	-0.222	9.875	27.582	-11.845	-7.898	1.549	3.559	20.983	1.741	5.128	-0.731	0.766	-1.143	28.53	21.456	30.719	17.287	10.576	0.912	-1.896	9.407	-3.419	-5.149	-4.371	-4.363	-4.09	2.386	1.753
291	-12.916	37.599	-10.019	-29.123	16.9	-3.422	5.487	6.019	14.888	-8.435	28.339	3.964	11.283	-8.272	-32.696	0.909	-10.209	-8.077	-1.778	0.843	7.984	-0.595	9.781	27.212	-11.919	-8.312	1.546	3.21	21.556	1.785	5.255	-0.559	1.086	-1	28.645	21.456	30.721	17.029	11.765	1.254	-1.726	9.31	-3.473	-5.32	-5.147	-4.459	-4.093	2.405	1.833
292	-12.614	37.404	-9.598	-28.548	16.947	-3.489	5.665	6.418	15.295	-8.157	28.329	3.673	11.89	-8.224	-32.242	0.888	-9.779	-7.739	-1.386	0.98	8.317	-0.863	10.116	27.194	-11.561	-7.842	1.889	3.462	21.816	1.998	5.728	-0.413	1.187	-1.351	29.258	21.406	31.032	17.695	11.77	1.351	-1.241	9.336	-3.112	-5.288	-4.795	-4.086	-3.493	2.328	2.173
293	-14.32	37.218	-9.941	-28.567	16.331	-3.635	5.113	6.77	14.893	-7.917	27.396	3.377	11.571	-8.255	-32.631	0.641	-10.394	-7.64	-2.007	1.437	7.829	-1.385	9.782	27.345	-11.953	-7.562	1.577	3.357	21.659	2.225	5.366	-0.303	0.507	-1.084	29.364	21.504	30.581	18.193	11.475	1.522	-1.638	10.068	-3.802	-5.43	-4.931	-4.349	-4.25	2.756	1.757
294	-13.525	39.666	-10.137	-28.832	16.85	-3.543	5.382	6.704	14.708	-8.225	26.706	3.015	11.214	-8.18	-32.583	0.301	-10.667	-7.698	-2.034	1.445	7.647	-1.441	9.595	27.676	-11.795	-7.678	1.093	3.003	21.51	2.035	5.257	-0.24	0.347	-1.468	29.384	21.566	30.632	18.415	10.648	1.468	-1.687	9.411	-4.298	-5.366	-5.006	-3.912	-4.171	2.513	1.813
295	-14.333	39.386	-10.513	-28.674	17.033	-3.31	4.746	6.945	14.78	-8.248	25.932	2.699	11.501	-7.893	-33.595	0.283	-10.867	-7.738	-2.354	1.473	7.468	-1.695	9.746	28.33	-12.239	-7.663	1.058	3.604	21.309	2.226	5.066	-0.172	0.376	-1.24	28.812	21.769	30.426	18.837	10.256	1.493	-1.963	10.514	-4.181	-5.338	-5.172	-3.898	-4.592	2.645	1.766
296	-14.322	39.988	-9.53	-28.772	17.65	-3.427	5.97	6.712	14.922	-7.907	26.239	2.141	12.261	-7.865	-32.639	0.313	-9.793	-7.729	-1.438	1.315	8.201	-1.838	10.954	28.998	-10.569	-6.316	1.547	3.092	22.254	2.115	5.57	-0.491	1.013	-1.274	30.202	21.837	31.116	19.129	10.606	1.234	-1.124	9.83	-3.308	-5.291	-4.459	-3.812	-3.464	2.71	2.376
297	-14.485	40.187	-10.462	-28.952	17.085	-3.252	3.843	7.232	13.273	-7.586	24.633	1.502	11.026	-8.283	-33.503	0.197	-11.194	-8.065	-2.407	1.268	7.075	-2.013	9.714	28.503	-12.614	-7.616	0.252	2.929	21.439	2.072	4.434	-0.689	1.095	-1.038	29.014	21.523	29.662	19.312	9.96	1.037	-2.421	10.011	-4.587	-5.646	-6.096	-3.855	-4.624	2.44	1.041
298	-14.994	39.751	-9.192	-28.618	18.483	-3.211	5.337	7.498	15.251	-8.022	25.636	1.653	12.866	-8.188	-32.344	0.238	-9.834	-8.303	-1.197	1.291	8.337	-1.866	10.854	28.241	-10.554	-6.41	2.002	3.375	23.001	2.147	6.084	-0.629	2.347	-1.569	30.544	21.714	30.431	19.889	11.423	1.231	-0.963	10.779	-3.528	-5.588	-5.643	-3.556	-3.346	2.565	2.482
299	-15.642	41.028	-10.482	-28.836	17.026	-3.142	4.197	7.304	13.66	-7.897	23.947	1.55	11.608	-8.103	-34.334	0.58	-11.204	-8.072	-2.361	1.419	7.047	-2.101	9.404	27.883	-11.752	-6.32	0.663	3.189	21.648	2.256	5.017	-0.645	0.318	-1.392	29.469	21.586	29.302	20.404	10.48	1.232	-2.079	10.167	-4.823	-5.62	-5.389	-3.497	-4.685	2.574	1.416
300	-16.753	41.275	-10.396	-28.742	17.366	-2.98	3.699	7.864	14.102	-7.803	23.93	1.369	11.89	-8.028	-33.37	0.632	-11.02	-8.236	-1.942	1.373	7.456	-2.372	10.185	28.788	-11.666	-6.637	1.069	3.301	21.857	2.202	4.968	-0.56	0.571	-1.195	29.877	21.61	29.767	20.226	11.015	1.388	-1.84	10.197	-4.717	-5.52	-5.681	-3.571	-4.33	2.397	1.596
301	-16.926	41.306	-10.172	-28.812	17.123	-3.094	3.973	7.868	13.73	-7.475	23.365	1.013	11.337	-8.529	-33.161	0.893	-10.794	-7.898	-1.927	1.423	7.52	-2.642	10.477	29.185	-11.085	-6.029	0.708	3.114	21.812	2.27	5.163	-0.45	0.778	-1.094	30.323	21.659	29.977	20.335	11.214	1.37	-1.768	9.758	-4.455	-5.797	-5.56	-3.543	-4.448	2.6	1.614
302	-17.127	40.678	-10.825	-28.699	16.298	-2.795	3.188	7.881	13.285	-7.536	22.067	0.928	10.863	-8.09	-34.401	1.042	-11.569	-7.827	-2.746	1.636	6.936	-2.723	9.727	29.639	-11.868	-6.051	0.489	3.702	21.237	2.655	4.352	-0.15	-1.142	-0.934	29.704	21.631	29.432	20.532	10.711	1.644	-2.807	10.365	-5.619	-5.475	-6.915	-2.971	-5.01	2.718	0.847
303	-18.03	41.293	-9.7	-28.574	17.423	-2.633	4.154	8.292	14.272	-7.987	22.836	0.647	11.831	-8.198	-33.467	0.879	-10.427	-7.813	-1.561	1.593	7.762	-2.785	10.701	29.806	-10.719	-5.876	1.622	3.613	22.092	2.541	5.6	-0.584	-0.186	-1.37	30.426	21.744	30.179	20.268	10.545	1.27	-1.421	10.009	-4.3	-5.594	-5.75	-3.037	-4.259	2.89	1.884
304	-18.513	41.038	-10.367	-28.866	17.056	-2.262	3.414	8.577	13.883	-7.806	21.875	0.454	11.214	-8.235	-34.877	0.913	-11.236	-7.945	-2.186	1.556	7.407	-2.844	10.049	29.625	-11.459	-5.388	0.545	3.784	21.686	2.53	4.474	-0.368	0.416	-1.158	30.327	22.094	29.194	20.576	10.791	1.474	-2.234	10.094	-4.864	-5.459	-7.098	-2.955	-5.09	2.987	1.022
305	-17.88	42.571	-9.694	-28.809	17.19	-2.586	3.606	8.349	14.309	-8.058	22.04	-0.051	11.685	-8.295	-34.378	0.836	-10.731	-8.19	-1.859	1.451	7.762	-2.837	10.632	29.717	-11.093	-5.511	0.694	3.112	22.094	2.5	4.96	-0.771	0.601	-1.128	30.459	21.66	29.526	20.387	11.037	1.289	-2.081	10.219	-4.644	-5.587	-5.934	-3.1	-4.496	2.744	1.518
306	-18.17	43.172	-10.039	-28.734	16.349	-2.946	3.355	8.318	13.657	-7.984	21.134	-0.451	11.685	-8.406	-35.191	0.931	-11.099	-8.066	-2.291	1.241	7.247	-3.067	9.991	29.055	-11.577	-5.562	0.725	3.413	21.604	2.437	4.112	-0.909	-0.52	-1.572	30.453	21.785	29.345	20.599	10.915	1.24	-2.271	10.001	-4.904	-5.612	-7.796	-3.045	-4.789	2.218	1.102
307	-17.357	43.039	-10.161	-29.009	16.575	-2.693	2.989	8.99	14.23	-8.564	20.464	-0.657	11.53	-8.444	-35.592	0.848	-11.422	-8.206	-2.247	1.158	7.035	-3.45	10.014	29.272	-11.534	-5.805	0.43	3.163	21.269	2.385	4.18	-1.005	-0.983	-1.583	30.475	21.78	28.774	20.591	9.951	1.116	-2.394	9.846	-4.999	-5.8	-7.752	-3.284	-5.149	2.482	1.102
308	-18.454	44.13	-10.508	-28.912	15.783	-2.791	3.099	9.073	13.454	-8.173	19.757	-0.894	11.339	-8.383	-35.993	1.02	-11.672	-7.94	-2.36	1.408	6.556	-3.435	9.531	29.286	-12.041	-5.629	-0.013	3.275	21.474	2.259	3.601	-0.939	-0.698	-1.509	29.938	22.089	28.429	20.706	9.311	1.329	-2.942	9.958	-5.031	-6.151	-6.727	-3.205	-5.329	2.349	0.873
309	-18.213	43.245	-9.632	-28.872	16.89	-2.668	3.719	9.431	14.885	-8.386	20.619	-0.63	12.417	-7.944	-34.751	1.166	-10.319	-7.568	-1.439	1.759	7.339	-3.408	10.687	29.799	-10.802	-5.375	1.057	3.469	22.272	2.613	4.504	-0.664	1.414	-1.197	31.506	22.117	29.306	20.665	10.662	1.437	-1.62	9.391	-4.541	-6.048	-6.969	-3.153	-4.38	2.518	1.717
310	-18.7	43.455	-9.715	-28.767	16.666	-2.668	3.804	9.793	14.399	-8.33	19.95	-0.883	12.178	-8.055	-35.098	1.432	-10.751	-7.959	-1.465	1.761	6.656	-3.077	10.614	30.146	-11.214	-5.332	0.729	3.281	21.834	2.636	4.343	-0.654	0.195	-1.196	31.467	22.204	29.022	20.808	10.081	1.254	-1.861	10.409	-4.585	-6.462	-6.7	-3.133	-4.464	2.374	1.326
311	-19.28	43.349	-9.488	-28.436	16.814	-2.565	4.289	9.751	14.662	-8.17	20.473	-1.027	12.874	-8.027	-35.509	1.551	-10.049	-8.02	-1.053	1.649	7.086	-2.922	11.052	30.006	-10.705	-5.445	1.306	3.654	22.692	2.441	4.543	-0.666	1.036	-0.991	31.573	22.204	29.791	20.572	10.995	1.035	-1.679	9.964	-4.171	-6.573	-6.469	-2.901	-4.028	2.192	1.936
312	-19.626	43.682	-9.925	-28.528	16.782	-2.262	4.089	10.162	14.857	-8.258	20.047	-1.055	12.609	-7.956	-36.449	1.698	-10.359	-7.997	-1.022	1.514	6.78	-2.446	10.609	29.779	-11.065	-5.6	0.931	3.493	22.372	2.552	4.298	-1.087	-0.238	-1.272	32.026	22.332	29.864	20.582	10.889	1.569	-1.882	10.176	-4.657	-6.303	-7.381	-2.774	-4.271	2.213	1.81
313	-18.375	43.842	-9.812	-28.739	17.002	-1.976	4.142	10.079	14.611	-8.399	20.136	-1.086	12.063	-8.179	-35.88	1.536	-10.472	-8.03	-1.032	1.523	6.389	-2.494	10.698	29.668	-11.125	-5.705	1.127	3.63	22.57	2.333	4.326	-1.04	-0.568	-1.101	32.261	22.162	29.77	20.176	11.316	1.637	-1.927	9.502	-4.526	-6.533	-7.009	-2.99	-4.178	1.865	1.837
314	-18.883	45.327	-10.103	-28.915	16.976	-2.248	4.246	9.955	14.454	-8.648	19.75	-1.271	12.315	-8.072	-36.017	1.437	-10.494	-8.101	-0.891	1.48	6.522	-2.926	10.581	29.69	-10.971	-5.543	1.092	3.453	22.443	2.332	4.32	-1.149	0.014	-1.951	31.922	21.972	29.879	19.957	10.743	1.206	-1.971	10	-4.816	-6.652	-7.103	-3.296	-4.059	1.597	1.818
315	-19.608	49.985	-10.357	-28.884	16.749	-1.921	3.694	10.212	14.058	-8.316	19.064	-1.392	11.796	-8.016	-36.468	1.441	-10.497	-8.099	-1.275	1.488	6.163	-3.09	10.419	29.674	-11.408	-5.685	0.875	3.484	22.265	2.178	3.856	-1.001	-0.44	-1.746	31.831	22.337	29.668	19.727	10.97	1.289	-2.395	10.07	-5.339	-6.721	-7.48	-2.945	-4.333	1.753	1.491
316	-17.793	49.501	-10.804	-28.954	15.751	-2.111	3.625	10.198	13.066	-7.859	18.226	-1.534	11.554	-7.932	-37.505	1.451	-10.807	-8.172	-1.533	1.566	5.618	-3.487	10.174	30.433	-11.883	-5.892	0.117	3.348	21.455	2.541	3.224	-0.909	-1.045	-1.809	31.685	22.626	28.609	19.711	9.753	1.26	-2.757	8.768	-5.503	-6.882	-7.843	-2.914	-4.866	1.921	1.091
317	-17.269	53.4	-10.183	-28.458	16.704	-1.782	4.241	10.293	14.274	-8.265	19.067	-1.512	12.812	-7.799	-35.768	1.184	-9.942	-8.398	-0.819	1.515	5.982	-3.403	11.048	30.528	-11.063	-5.435	1.205	3.731	22.287	2.343	3.846	-1.049	-0.381	-1.571	32.774	22.677	29.237	19.859	11.312	1.272	-2.105	9.879	-5.053	-6.738	-6.808	-2.926	-4.319	1.755	1.826
318	-17.269	53.4	-10.232	-28.517	16.286	-1.802	3.552	10.644	13.444	-7.517	18.6	-1.719	12.505	-7.986	-36.367	0.717	-10.308	-8.623	-0.991	1.582	5.551	-3.332	10.437	30.04	-11.507	-5.502	0.685	3.492	21.481	2.118	3.328	-0.778	-0.418	-1.819	32.652	22.741	28.857	19.863	10.529	1.342	-2.168	9.821	-5.437	-6.64	-8.471	-2.919	-4.508	1.931	1.574
319	-14.994	53.4	-10.202	-28.467	16.559	-1.713	4.096	10.363	13.529	-7.871	18.917	-1.615	12.891	-8.07	-36.38	0.909	-10.21	-8.79	-0.73	1.3	5.251	-3.243	10.972	30.767	-11.237	-5.327	0.802	3.329	21.974	1.92	3.347	-0.785	-0.3	-1.726	33.187	22.786	29.462	20.356	10.494	1.159	-2.159	9.621	-4.961	-6.852	-7.525	-3.026	-4.469	1.473	1.79
320	-14.994	53.4	-8.964	-28.648	17.481	-1.614	5.174	10.814	14.475	-7.671	19.678	-1.7	14.038	-7.946	-35.258	0.784	-8.857	-8.325	0.234	1.239	6.032	-3.14	11.888	30.842	-10.141	-5.306	1.714	3.152	23.276	2.019	4.259	-0.702	1.485	-1.749	34.582	23	30.926	20.413	10.972	1.366	-1.103	9.589	-4.648	-6.992	-6.652	-2.866	-3.235	1.515	2.846
321	-12.719	53.4	-10.055	-28.561	16.672	-1.423	4.675	10.404	14.247	-8.2	18.492	-2.093	13.289	-7.75	-37.52	0.93	-9.468	-8.586	-0.582	1.077	4.803	-3.264	10.845	30.405	-11.202	-5.107	1.046	3.195	22.283	1.73	3.331	-0.823	1.141	-1.64	33.931	22.951	30.057	20.38	11.169	1.448	-2.162	8.942	-5.154	-7.234	-7.284	-3.062	-4.3	1.571	2.289
322	-12.719	53.4	-9.44	-28.587	17.015	-1.58	4.549	10.819	13.807	-7.592	19.126	-1.915	13.475	-7.872	-36.919	0.905	-9.159	-8.604	-0.195	1.057	4.973	-3.443	11.454	30.625	-10.776	-5.179	1.421	3.213	22.544	1.549	3.394	-0.861	1.831	-1.484	34.64	23.16	29.933	20.481	11.079	1.494	-1.519	9.212	-5.351	-7.485	-7.38	-2.783	-3.752	1.653	2.734
323	-10.444	53.4	-9.469	-28.271	16.66	-1.817	4.994	10.677	14.467	-8.128	18.567	-2.168	13.313	-8.158	-37.79	1.201	-9.037	-8.938	-0.007	0.695	4.348	-3.347	11.616	31.001	-10.759	-5.159	1.455	3.322	22.523	1.305	3.665	-0.647	0.899	-1.965	34.554	23.254	29.78	20.425	11.509	1.323	-1.55	9.14	-5.641	-7.726	-6.629	-2.803	-3.923	1.529	2.788
324	-10.444	53.4	-10.15	-28.072	15.767	-1.642	3.613	11.014	13.819	-8.33	17.599	-2.226	12.914	-7.997	-38.217	1.306	-9.931	-8.726	-0.483	0.728	3.566	-3.186	10.952	31.382	-11.742	-5.143	0.448	3.225	21.928	1.475	2.614	-0.756	0.996	-1.984	34.186	23.268	28.667	20.607	10.149	1.111	-2.537	8.967	-6.466	-7.858	-8.368	-2.877	-4.873	1.641	2.029
325	-10.444	53.4	-9.818	-27.823	16.156	-1.32	4.979	10.632	13.227	-7.466	17.714	-2.241	13.285	-7.882	-38.568	1.729	-9.542	-8.688	-0.155	0.78	3.201	-3.064	11.161	31.301	-11.271	-5.091	0.641	3.15	21.981	1.358	2.88	-0.797	1.194	-2.144	34.504	23.507	28.042	20.699	10.958	1.38	-2.06	9.701	-5.862	-7.812	-7.478	-2.597	-4.547	1.531	2.217
326	-10.444	53.4	-9.91	-27.927	15.653	-1.114	4.357	10.894	14.02	-8.408	17.422	-2.284	13.218	-7.75	-39.362	1.7	-9.568	-8.621	-0.678	0.923	2.776	-3.055	10.783	30.734	-11.405	-5.214	0.687	3.297	21.712	1.152	2.735	-0.788	0.992	-2.018	34.709	23.657	26.989	20.757	10.075	0.77	-2.447	9.989	-6.298	-7.986	-7.961	-2.76	-4.755	1.306	2.194
327	-10.444	53.4	-8.977	-27.885	16.272	-1.012	5.149	10.76	14.748	-8.356	18.123	-2.234	14.277	-7.629	-38.27	1.95	-8.656	-8.774	0.221	1.096	3.615	-2.919	11.397	30.416	-10.544	-5.278	1.191	2.635	22.548	1.058	3.769	-0.967	1.711	-2.321	35.935	23.69	27.423	20.781	11.388	1.107	-1.531	9.075	-5.366	-8.255	-7.197	-2.697	-4.224	1.495	3.488
328	-8.169	53.4	-10.333	-27.649	15.395	-0.721	4.065	11.102	14.195	-8.474	16.935	-2.165	12.52	-7.886	-38.872	1.871	-9.544	-8.687	-0.596	1.161	2.136	-2.691	10.643	30.953	-11.596	-5.192	0.267	2.996	21.983	1.037	2.409	-0.856	0.579	-2.084	34.781	23.973	25.716	20.789	10.49	1.285	-2.626	8.453	-6.778	-8.434	-8.45	-2.76	-5.447	1.702	2.121
329	-10.444	53.4	-10.117	-28.194	15.336	-1.183	3.878	11.014	13.452	-7.942	17.292	-2.002	13.292	-7.837	-38.969	1.839	-9.067	-8.749	-0.044	1.22	2.686	-2.754	10.73	30.545	-10.937	-5.318	0.537	2.581	21.963	1.038	2.738	-1.111	1.684	-2.267	35.706	24.198	26.046	20.399	10.767	1.311	-1.983	7.802	-6.577	-8.898	-7.228	-2.792	-5.163	1.437	2.518
330	-8.169	53.4	-10.681	-27.994	14.574	-0.868	3.741	10.965	12.998	-7.979	16.173	-2.23	12.918	-7.806	-40.415	2.094	-9.516	-8.852	-0.29	0.934	1.865	-2.54	10.353	30.868	-11.467	-5.123	-0.026	2.601	21.282	1.095	2.135	-0.917	0.814	-2.175	34.945	24.191	25.402	20.434	10.623	1.403	-2.667	8.809	-7.37	-9.117	-9.118	-2.498	-5.861	1.389	1.633
331	-8.169	53.4	-9.64	-27.976	15.258	-0.838	4.872	10.703	14.401	-8.233	17.19	-2.158	13.629	-8.034	-40.31	2.202	-8.914	-8.91	0.787	0.847	2.598	-2.581	11.335	31.084	-10.572	-5.19	0.655	2.299	22.082	0.912	2.939	-1.064	1.116	-2.234	35.858	24.374	26.231	20.173	11.55	1.134	-1.689	8.852	-6.41	-9.255	-8.456	-2.607	-5.203	1.523	2.484
332	-5.894	53.4	-9.932	-27.782	15.013	-0.717	4.947	10.708	13.701	-7.606	16.585	-2.208	13.474	-8.273	-39.817	1.93	-8.941	-9.166	1.092	0.942	2.098	-2.457	11.417	31.233	-10.895	-5.166	0.666	2.823	21.878	1.045	2.8	-0.858	0.997	-2.137	35.734	24.75	26.128	20.155	11.06	1.285	-1.84	8.609	-6.993	-9.264	-8.616	-2.732	-5.324	1.679	2.658
333	-8.169	53.4	-10.498	-27.57	14.393	-0.418	3.691	10.81	13.335	-7.92	16.087	-2.414	13.187	-8.044	-39.974	2.095	-9.508	-9.346	0.833	0.974	1.43	-2.341	10.322	30.306	-11.335	-5.204	0.389	2.753	21.419	0.878	2.203	-0.567	-0.179	-2.168	35.01	24.897	25.547	20.301	9.909	0.902	-2.465	8.777	-7.492	-9.342	-8.003	-2.581	-6.14	1.627	2.013
334	-8.169	53.4	-9.508	-27.433	15.099	-0.087	5.24	10.64	15.019	-8.503	16.736	-2.363	13.938	-7.996	-39.677	2.3	-8.566	-8.713	1.582	1.269	1.89	-1.87	11.668	31.082	-10.588	-5.119	0.954	2.398	22.125	0.9	2.968	-0.527	1.269	-2.169	36.524	25.099	26.615	20.559	11.59	1.366	-1.602	9.232	-6.868	-9.306	-7.793	-2.509	-5.284	1.717	3.019
335	-5.894	53.4	-10.366	-27.314	14.336	0.293	3.899	10.992	14.081	-8.064	16.047	-2.215	13.182	-8.079	-41.09	2.035	-9.351	-8.978	1.157	1.064	0.816	-2.073	10.623	31.13	-11.628	-5.298	-0.179	1.994	21.155	0.704	2.013	-0.873	-0.286	-2.411	35.57	25.185	26.025	20.607	10.267	1.161	-2.559	8.477	-7.301	-9.471	-9.256	-2.378	-6.255	1.582	1.955
336	-5.894	53.4	-10.315	-27.609	14.652	0.771	4.42	10.506	13.553	-7.915	15.802	-2.272	13.244	-8.08	-41.188	2.137	-9.028	-9.025	1.425	1.204	0.999	-1.963	10.888	30.961	-11.287	-5.042	0.224	2.51	21.679	0.569	2.22	-0.599	0.429	-2.309	36.097	25.329	26.422	20.584	10.405	1.472	-2.381	9.217	-7.201	-9.548	-8.856	-2.438	-6.797	1.948	2.094
337	-5.894	53.4	-10.545	-27.463	14.065	0.569	3.955	10.673	13.837	-8.255	15.607	-2.441	12.908	-8.303	-41.637	2.051	-9.244	-9.094	1.732	0.988	0.478	-1.947	10.85	31.498	-11.473	-4.975	-0.474	1.953	21.231	0.544	1.904	-0.418	0.003	-2.199	36.096	25.437	26.166	20.637	10.164	1.338	-2.83	9.255	-7.829	-9.694	-8.45	-2.373	-7.187	2.174	1.592
338	-8.169	53.4	-11.036	-27.447	13.526	0.658	3.812	10.285	13.451	-8.273	14.712	-2.694	12.42	-8.258	-41.681	2.119	-9.35	-9.038	1.456	0.851	0.049	-1.933	10.007	31.311	-12.244	-5.201	-0.749	2.236	20.497	0.29	1.213	-0.533	-0.803	-2.43	35.141	25.361	25.78	20.616	9.983	1.261	-3.347	9.588	-8.349	-9.607	-9.829	-2.484	-8.159	2.202	1.388
339	-8.169	53.4	-9.963	-27.261	14.586	0.434	3.872	10.401	14.244	-8.417	15.735	-3.026	13.606	-8.478	-42.52	2.162	-8.508	-9.155	2.816	0.357	0.819	-1.851	11.112	31.476	-11.204	-5.082	0.039	1.757	21.464	0.388	2.438	-0.355	0.644	-2.42	36.829	25.139	26.717	20.562	10.343	1.001	-2.142	8.88	-6.925	-9.762	-7.81	-2.785	-7.098	1.975	2.376
340	-8.169	53.4	-10.614	-27.238	14.175	0.671	4.063	10.045	14.195	-8.414	15.402	-2.936	13.127	-8.2	-43.155	2.663	-8.995	-9.109	2.874	0.399	0.117	-1.721	10.643	31.711	-11.407	-5.066	-1.156	1.621	21.56	0.224	2.134	-0.336	-0.289	-1.978	36.446	25.297	26.152	20.662	10.76	1.389	-2.517	9.478	-7.425	-9.655	-9.406	-2.486	-7.668	1.996	1.824
341	-5.894	53.4	-10.286	-27.48	14.495	1.167	4.416	10.339	14.826	-8.594	15.39	-2.859	13.889	-8.003	-42.764	2.747	-8.959	-9.419	3.484	0.415	0.423	-1.395	10.762	31.793	-11.165	-5.086	-0.571	1.824	21.384	0.29	2.254	-0.389	0.259	-1.817	36.654	25.289	26.838	20.892	10.883	1.696	-2.511	8.833	-6.87	-9.836	-9.203	-2.237	-7.225	2.133	2.145
342	-5.894	53.4	-10.62	-27.436	14.271	1.59	3.704	10.74	14.464	-8.195	14.736	-2.782	13.463	-8.051	-43.218	2.847	-9.394	-9.195	3.66	0.34	0.124	-1.146	10.572	31.942	-11.406	-4.946	-0.801	2.219	21.163	0.208	1.702	-0.239	-0.367	-1.862	36.662	25.245	26.272	20.853	10.273	1.516	-3.082	9.296	-7.195	-9.718	-9.455	-2.018	-7.676	2.153	1.802
343	-8.169	53.4	-10.824	-27.036	13.443	1.706	3.93	10.716	14.083	-8.229	13.929	-2.893	13.383	-7.815	-43.795	2.906	-9.437	-8.844	3.502	0.452	-0.276	-0.733	10.38	32.26	-11.428	-4.53	-1.006	2.584	20.614	0.027	1.5	-0.208	-0.808	-1.85	36.433	25.48	25.797	20.686	9.127	1.273	-3.176	10.336	-7.403	-9.979	-10.075	-2.16	-8.008	2.231	1.655
344	-8.169	53.4	-11.739	-26.624	13.118	1.656	2.934	10.988	13.503	-7.962	13.274	-3.022	13.054	-7.909	-44.669	2.964	-9.198	-8.444	3.476	0.307	-0.455	-0.322	10.466	32.424	-12.11	-4.863	-0.838	2.812	20.895	0.069	1.18	-0.107	-1.273	-1.999	36.406	25.603	25.641	20.917	9.922	1.681	-3.345	10.151	-7.402	-9.928	-9.354	-2.132	-8.18	2.315	1.128
345	-8.169	53.4	-12.147	-27.337	13.718	1.645	3.779	11.058	14.227	-7.861	13.724	-3.33	14.137	-7.921	-43.511	2.992	-8.427	-9.114	4.43	0.245	0.572	-0.32	11.418	32.792	-11.185	-4.664	-0.005	2.915	21.487	-0.123	1.934	-0.109	-1.027	-1.872	37.337	25.644	26.5	20.791	10.577	1.656	-2.608	10.133	-6.611	-10.083	-9.549	-1.979	-7.579	2.311	1.939
346	-8.169	53.4	-11.793	-28.581	14.14	1.621	4.746	11.284	14.788	-7.914	14.28	-3.544	14.899	-7.925	-43.514	3.127	-7.933	-9.125	5.105	0.414	1.046	0.024	11.595	32.199	-10.742	-4.649	0.439	2.643	22.024	-0.198	2.428	-0.351	0.257	-2.056	38.013	25.526	27.351	21.111	11.194	1.74	-1.839	9.444	-6.208	-10.253	-8.403	-1.924	-7.044	2.12	2.474
347	-10.444	53.4	-12.36	-35.851	13.259	1.739	4.521	11.647	13.916	-7.567	13.612	-3.774	14.125	-8.15	-44.186	3.011	-8.907	-9.798	4.67	0.049	0.556	0.145	11.58	32.825	-11.432	-4.953	-0.224	2.495	21.549	-0.401	1.544	-0.46	-0.428	-2.402	37.311	25.785	26.614	21.299	11.439	1.767	-2.733	9.518	-6.536	-10.251	-9.084	-2.019	-7.937	2.452	1.847
348	-8.169	53.4	-12.028	-39.592	13.562	2.116	4.407	11.304	14.819	-7.825	13.821	-3.773	14.479	-8.076	-43.735	2.942	-8.627	-10.338	5.146	-0.036	0.602	0.265	11.64	32.788	-11.402	-4.971	-0.308	2.294	21.409	-0.424	1.723	-0.523	-0.084	-2.214	37.973	25.978	26.947	21.683	10.862	1.798	-2.394	9.639	-6.694	-10.278	-9.105	-2.023	-8.133	2.604	1.769
349	-10.444	53.4	-11.811	-40.854	13.516	2.093	4.069	11.351	14.355	-7.516	13.834	-3.989	14.677	-8.036	-43.8	2.768	-8.426	-10.73	5.5	-0.403	0.495	0.169	11.277	32.085	-11.411	-5.03	-0.414	1.826	21.669	-0.842	1.759	-0.393	-0.069	-2.09	38.281	25.873	26.71	21.464	10.761	1.401	-2.414	9.285	-6.283	-10.555	-9.205	-2.064	-8.507	2.709	1.677
350	-10.444	53.4	-10.758	-41.298	13.971	2.306	3.959	11.58	14.893	-7.629	14.163	-4.026	15.007	-7.939	-43.805	2.864	-7.925	-11.127	5.722	-0.648	0.979	0.161	11.907	32.726	-10.672	-4.762	0.192	2.023	21.984	-0.764	2.205	-0.341	-0.151	-2.158	38.704	25.941	27.478	21.663	11.002	1.476	-2.272	9.358	-6.144	-10.463	-8.649	-1.997	-8.197	2.906	1.844
351	-10.444	53.4	-10.553	-41.572	13.765	2.594	3.463	11.856	15.084	-8.006	14.111	-4.099	14.698	-8.002	-43.825	2.824	-7.961	-11.43	5.401	-0.892	0.976	0.271	12.076	33.407	-10.777	-4.624	-0.059	2.122	21.922	-1.188	1.865	-0.368	-0.485	-2.101	39.312	25.96	27.384	21.47	11.183	1.544	-2.517	9.671	-6.469	-10.787	-9.334	-2.004	-8.475	2.925	1.426
352	-10.444	53.4	-9.705	-41.63	14.214	2.451	4.341	11.867	15.179	-7.451	14.381	-4.063	15.431	-7.816	-43.836	3.041	-7.189	-11.582	6.294	-1.232	1.144	0.358	12.849	33.966	-10.475	-4.436	0.236	1.608	22.79	-1.196	2.131	-0.26	0.425	-2.232	39.776	26.156	27.838	21.21	11.513	1.65	-2.086	8.878	-6.065	-10.99	-8.701	-1.906	-8.23	3.327	1.95
353	-12.719	53.4	-10.287	-41.598	13.761	2.394	4.011	11.944	15.207	-7.625	14.111	-3.662	14.693	-7.958	-44.16	2.826	-7.383	-11.357	5.589	-1.058	0.529	0.468	12.26	34.11	-10.897	-4.31	-0.372	1.753	22.219	-1.247	1.296	-0.226	-0.413	-1.829	39.519	26.16	27.448	21.263	10.961	1.557	-2.493	8.845	-6.939	-11.111	-9.352	-1.978	-8.717	3.471	1.443
354	-12.719	53.4	-10.325	-41.518	13.853	2.514	4.339	11.605	15.127	-7.642	13.939	-3.659	14.334	-8.211	-44.18	2.86	-7.398	-11.364	5.343	-1.639	0.713	0.569	12.344	34.031	-10.885	-4.485	-0.632	1.036	22.44	-1.271	1.177	-0.664	-0.369	-1.869	39.65	26.019	27.866	21.294	11.287	1.617	-2.511	9.22	-6.302	-10.97	-9.002	-1.923	-8.822	3.302	1.735
355	-12.719	53.4	-10.597	-41.309	13.464	2.498	3.975	12.052	14.758	-7.254	13.606	-3.355	13.946	-8.332	-44.159	2.913	-7.189	-11.291	4.913	-1.724	0.797	1.082	12.401	34.525	-10.948	-4.234	-0.916	1.31	22.726	-1.339	1.075	-0.504	-0.951	-1.749	39.625	26.152	28.022	21.731	11.173	1.69	-2.557	9.23	-6.327	-11.063	-9.342	-1.691	-9.313	3.564	1.863
356	-12.719	53.4	-10.263	-41.229	13.722	2.428	4.568	11.503	15.315	-7.608	13.51	-3.273	14.493	-8.252	-45.144	2.737	-6.357	-11.076	4.791	-2.194	0.867	0.899	12.694	34.381	-10.748	-4.151	-0.808	0.966	23.284	-1.558	1.375	-0.686	-0.909	-1.998	39.837	25.927	27.914	21.565	10.944	1.551	-2.63	9.236	-6.453	-11.463	-9.121	-1.966	-8.81	3.216	2.087
357	-12.719	53.4	-11.624	-41.097	12.436	2.553	3.008	11.613	14.124	-7.635	12.278	-3.142	13.816	-8.094	-46.575	2.733	-6.964	-10.597	3.646	-2.099	-0.018	1.181	11.36	34.172	-11.979	-4.469	-1.97	1.383	22.455	-1.769	-0.123	-0.757	-2.108	-1.898	38.907	25.867	26.579	21.647	9.406	1.695	-3.671	8.818	-8.008	-11.71	-9.974	-2.205	-10.202	3.437	0.782
358	-14.994	53.4	-10.516	-41.174	13.426	2.842	3.953	11.953	15.034	-7.68	13.406	-3.1	14.433	-8.337	-45.167	2.938	-5.523	-10.673	4.388	-1.924	1.228	1.098	13.271	35.545	-10.904	-4.068	-0.383	1.916	24.066	-1.747	0.88	-0.283	-0.531	-1.506	40.304	26.169	27.322	21.453	10.548	1.485	-2.77	9.405	-6.765	-11.729	-9.829	-2.108	-9.307	3.435	2.435
359	-14.994	53.4	-10.931	-41.08	12.801	2.215	3.69	11.756	15.241	-8.208	12.568	-3.04	13.3	-8.843	-45.605	2.676	-5.811	-10.745	3.663	-1.68	0.547	1.286	12.579	35.449	-11.419	-4.178	-1.146	1.496	23.99	-2.133	0.251	-0.411	-1.429	-1.585	40.191	26.274	26.441	21.125	9.778	1.176	-3.062	9.125	-7.033	-11.784	-10.22	-2.019	-9.883	3.443	1.978
360	-14.994	53.4	-10.243	-41.205	13.55	2.213	4.048	12.398	15.58	-7.919	13.165	-2.86	14.876	-8.735	-44.932	2.71	-4.542	-11.126	4.518	-1.644	1.326	1.526	13.548	34.967	-10.418	-4.147	-0.177	1.588	25.361	-2.349	1.346	-0.691	-0.108	-1.601	40.818	26.022	27.499	21.207	10.509	1.168	-2.206	9.317	-5.944	-11.998	-9.267	-2.146	-8.593	3.317	3.215
361	-17.269	53.4	-11.022	-40.952	13.262	2.641	4.259	12.505	15.085	-8.016	12.254	-2.508	13.738	-8.825	-45.564	2.813	-5.181	-10.927	3.73	-1.632	0.766	1.95	13.152	35.381	-10.806	-4.123	-0.733	1.693	25.477	-2.81	0.764	-0.784	-0.389	-1.659	40.841	26.217	27.197	21.367	10.327	1.044	-2.466	8.874	-6.695	-11.902	-9.483	-2.044	-9.208	3.454	2.551
362	-14.994	53.4	-10.895	-40.594	13.523	3.022	4.349	12.841	15.346	-8.396	11.886	-2.203	14.558	-8.356	-45.518	3.024	-5.242	-11.312	3.863	-1.499	0.924	2.483	13.549	35.578	-10.775	-3.954	-0.702	1.504	25.774	-2.763	0.722	-0.572	-0.648	-1.584	40.628	26.348	26.925	21.894	10.061	1.495	-2.367	9.194	-6.409	-11.802	-8.891	-2.129	-9.065	3.572	2.991
363	-17.269	53.4	-11.995	-40.369	12.814	3.204	3.562	12.578	14.448	-8.469	11.388	-2.283	13.714	-8.564	-46.307	2.947	-5.836	-11.475	3.058	-1.861	0.054	2.626	12.876	35.264	-11.279	-4.034	-1.062	2.163	25.247	-2.747	-0.042	-0.777	-1.177	-1.544	40.527	26.503	25.721	21.816	9.253	1.184	-3.071	9.094	-7.389	-12.194	-10.257	-1.955	-10.318	3.628	2.282
364	-17.269	53.4	-12.009	-39.785	13.19	3.331	3.75	12.723	15.179	-8.782	11.14	-2.068	13.976	-8.391	-46.523	3.066	-5.298	-11.089	2.958	-1.734	0.156	2.865	13.378	35.843	-11.192	-3.828	-0.744	2.083	25.301	-2.912	-0.115	-0.487	-1.242	-1.279	40.357	26.701	25.339	22.078	9.435	1.462	-2.746	9.121	-7.177	-12.217	-10.932	-1.819	-10.073	3.834	2.483
365	-17.269	53.4	-12.35	-39.325	12.83	2.961	3.658	13.25	14.792	-9.061	11.349	-2.301	13.932	-8.804	-46.468	2.766	-5.267	-11.282	3.088	-2.058	0.002	2.551	13.464	35.23	-11.096	-4.147	-0.441	2.382	25.542	-3.158	-0.379	-0.794	-1.669	-1.503	40.549	26.299	25.346	22.022	9.035	0.786	-2.956	8.947	-7.212	-12.605	-9.959	-2.226	-10.03	3.609	2.656
366	-14.994	53.4	-12.401	-38.663	13.407	2.998	4.636	13.041	14.513	-8.901	11.285	-2.433	13.965	-8.647	-45.815	2.695	-4.988	-11.168	3.31	-1.982	0.489	2.417	13.989	35.704	-10.879	-4.135	0.015	2.148	26.367	-3.37	-0.108	-1.051	-0.646	-1.039	41.28	26.357	25.499	22.444	9.502	0.891	-2.658	8.934	-7.256	-12.543	-10.384	-2.185	-9.908	3.582	3.394
367	-14.994	53.4	-12.353	-38.082	13.567	3.289	5.09	12.895	14.13	-8.743	11.626	-2.017	14.407	-8.461	-45.707	2.914	-4.342	-10.709	3.576	-1.82	0.74	2.388	14.539	36.043	-10.471	-4.116	0.425	2.287	26.347	-3.695	0.091	-0.68	0.046	-0.893	42.187	26.393	25.885	22.623	9.291	0.721	-2.288	9.082	-6.883	-12.555	-10.228	-1.746	-9.57	3.813	3.648
368	-14.994	53.4	-12.741	-37.48	13.277	2.937	4.835	13.285	14.338	-9.034	11.906	-2.022	13.815	-8.699	-45.27	3.23	-4.636	-10.716	3.674	-1.758	0.273	2.787	13.983	35.293	-10.895	-4.076	-0.339	2.044	26.344	-3.656	-0.402	-0.511	0.159	-0.508	42.075	26.766	25.572	22.332	9.291	0.944	-2.724	9.045	-6.889	-12.679	-11.39	-1.64	-9.841	3.849	3.421
369	-14.994	53.4	-13.028	-37.176	13.56	3.659	4.854	13.726	14.015	-8.895	11.452	-2.148	13.244	-9.103	-45.563	3.158	-4.485	-10.814	3.531	-1.756	0.271	2.933	14.57	35.905	-10.861	-4.113	-0.452	1.862	26.244	-3.776	-0.496	-0.591	-0.004	-0.695	42.221	26.854	25.541	22.149	9.772	1.249	-2.792	8.745	-7.46	-12.791	-11.152	-1.565	-10.034	3.931	3.407
370	-14.994	53.4	-12.617	-37.21	13.954	3.672	5.326	13.508	14.355	-8.922	12.057	-1.849	13.94	-8.596	-44.993	3.317	-3.626	-10.839	3.93	-1.475	0.579	3.224	15.029	36.053	-10.446	-4.216	-0.278	1.57	26.685	-3.983	0.018	-0.391	-0.348	-0.326	42.833	26.933	25.642	22.287	9.886	1.038	-2.143	8.611	-6.613	-12.966	-10.438	-1.516	-9.446	3.869	4.087
371	-12.719	53.4	-12.917	-36.877	14.563	4.78	5.327	13.793	14.683	-8.984	12.015	-1.766	13.833	-8.72	-44.725	3.561	-3.748	-10.514	4.123	-1.204	0.325	3.331	15.482	36.366	-10.419	-4.024	0.187	2.179	27	-3.955	-0.131	-1.095	0.224	-0.251	43.244	27.094	25.837	22.667	10.477	1.285	-2.031	9.091	-6.471	-12.942	-10.194	-1.487	-9.516	4.231	4.262
372	-14.994	53.4	-13.163	-36.63	14.172	3.679	4.554	14	14.347	-9.353	12.011	-1.803	13.389	-8.948	-45.098	3.37	-4.107	-10.812	3.451	-1.169	-0.181	3.139	15.385	36.642	-10.679	-4.035	-0.275	1.996	26.531	-4.213	-0.917	-0.907	-0.294	-0.716	43.247	26.882	25.447	22.217	9.574	1.023	-2.333	8.772	-6.677	-12.954	-10.066	-1.694	-10.097	4.213	4.161
373	-17.269	53.4	-13.752	-36.223	13.965	3.436	4.188	14.102	14.108	-9.301	12.305	-1.567	12.511	-9.008	-45.05	3.639	-4.174	-10.982	3.22	-1.162	-0.704	3.075	15.034	36.687	-11.049	-3.967	-1.152	1.429	26.671	-4.552	-0.959	-1.037	-0.406	-0.596	42.745	27.013	25.137	22.455	9.044	1.22	-2.77	7.905	-6.713	-12.982	-9.868	-1.795	-10.603	4.257	4.087
374	-14.994	53.4	-13.473	-36.413	14.384	3.849	4.327	13.997	14.465	-9.577	12.732	-1.812	12.761	-9.176	-45.497	3.601	-4.217	-11.061	3.51	-0.946	-0.679	2.796	15.55	37.134	-10.811	-4.108	-0.771	1.348	26.875	-5.016	-0.773	-1.093	0.789	-0.434	43.373	26.643	25.144	22.021	9.32	1.146	-2.628	8.013	-6.503	-13.148	-11.38	-1.363	-10.713	4.343	4.068
375	-17.269	53.4	-12.613	-36.222	15.476	3.11	5.794	13.917	16.186	-10.039	14.388	-1.709	13.681	-9.477	-44.471	3.647	-2.708	-11.049	4.746	-0.761	0.583	2.661	16.173	36.338	-9.8	-4.378	0.188	1.164	28.042	-5.192	0.193	-1.721	2.047	-0.97	44.79	26.592	25.754	21.46	10.686	1.009	-1.673	7.982	-5.415	-13.436	-9.765	-1.595	-9.256	4.087	5.152
376	-14.994	53.4	-14.323	-35.55	14.328	3.219	4.438	14.074	14.17	-9.456	13.102	-1.491	12.197	-9.144	-46.299	3.975	-4.105	-10.559	3.406	-0.515	-0.461	2.82	14.811	36.336	-11.176	-4.064	-0.944	1.596	26.622	-4.98	-1.417	-1.642	0.077	-0.559	43.484	26.854	24.308	21.308	8.487	0.899	-2.957	8.104	-7.2	-13.589	-11.439	-1.158	-10.987	4.257	3.744
377	-19.544	53.4	-14.179	-35.013	14.105	3.373	4.289	14.516	13.758	-9.447	13.444	-1.509	11.85	-9.072	-45.517	3.967	-4.319	-10.347	3.349	-0.273	-0.955	3.008	15.054	36.924	-11.596	-3.989	-1.367	1.306	26.527	-5.32	-1.612	-1.745	-0.359	-0.47	43.532	27.128	23.36	21.446	8.331	1.102	-3.04	8.341	-7.017	-13.465	-12.124	-0.968	-11.233	4.357	3.672
378	-17.269	53.4	-12.947	-34.408	15.439	3.894	5.65	14.525	14.94	-8.993	14.74	-1.241	13.307	-8.847	-45.15	4.353	-3.327	-10.197	4.567	0.129	0.36	3.346	16.38	37.242	-10.515	-3.9	-0.319	1.749	28.01	-5.64	-0.729	-1.771	0.722	-0.288	45.181	27.085	23.627	22.33	9.897	1.374	-1.952	8.522	-5.978	-13.397	-10.532	-0.976	-9.966	4.744	5.155
379	-17.269	53.4	-13.275	-34.21	14.802	3.582	5.251	14.747	13.689	-8.368	14.552	-1.078	12.593	-8.992	-45.933	4.328	-3.809	-10.273	4.209	0.549	0.18	3.532	16.253	37.681	-10.851	-3.737	-0.568	2.022	28.13	-5.723	-1.158	-1.583	0.753	-0.032	44.767	27.267	22.845	22.955	9.264	1.433	-2.325	9.141	-6.197	-13.491	-10.699	-0.702	-10.698	4.739	4.966
380	-17.269	53.4	-13.658	-34.182	14.702	3.555	5.404	14.12	12.894	-8.573	14.368	-1.173	11.819	-9.118	-45.909	4.355	-4.223	-10.471	3.798	0.796	0.133	3.194	16.107	37.924	-11.357	-3.95	-0.932	1.835	27.468	-6.018	-1.938	-1.965	0.601	-0.163	44.637	27.251	21.697	22.775	8.523	1.184	-2.929	9.17	-6.699	-13.465	-11.372	-0.851	-11.04	4.566	4.613
381	-19.544	53.4	-13.322	-34.041	14.747	2.849	5.511	14.283	13.762	-9.109	14.879	-1.373	11.964	-9.429	-46.785	4.047	-4.153	-10.038	4.25	0.836	0.338	3.11	16.554	37.587	-11.034	-3.894	-1.128	1.029	27.946	-6.153	-1.888	-2.223	1.784	-0.482	45.057	27.094	21.077	22.558	8.57	0.977	-2.677	7.82	-6.599	-13.881	-11.357	-0.874	-10.88	4.479	4.945
382	-21.819	53.4	-13.092	-33.741	15.113	3.222	5.569	14.4	14.081	-9.045	15.129	-1.009	11.947	-9.576	-45.46	4.231	-3.574	-9.962	4.493	1.024	0.199	3.127	16.246	36.929	-10.819	-4.051	-0.65	1.509	28.161	-6.512	-1.787	-2.233	1.424	-0.542	45.538	26.952	20.741	22.72	9.608	1.271	-2.435	8.088	-6.181	-13.93	-11.564	-0.675	-10.556	4.399	5.365
383	-19.544	53.4	-12.676	-33.545	15.583	2.896	5.613	13.989	14.028	-9.279	15.601	-1.281	12.202	-9.511	-45.687	3.91	-2.954	-10.164	5.285	0.797	0.459	3.18	17.204	37.524	-10.391	-4.196	-0.004	1.339	28.732	-6.768	-1.554	-2.502	1.32	-0.636	46.147	26.917	20.888	22.588	9.94	0.943	-1.652	7.594	-5.74	-14.084	-11.399	-0.727	-10.469	4.267	6.015
384	-21.819	53.4	-12.202	-33.078	15.815	3.183	6.148	14.21	14.224	-9.17	15.755	-0.844	12.284	-9.727	-45.973	4.116	-2.447	-9.682	5.633	1.069	0.939	3.091	17.434	37.659	-10.29	-4.011	-0.259	1.126	29.162	-6.803	-1.467	-2.463	2.556	-0.416	46.88	27.06	20.766	23.203	9.798	0.838	-1.757	8.423	-5.512	-14.249	-12.093	-0.136	-10.125	4.362	6.295
385	-21.819	53.4	-13.261	-32.823	14.671	3.684	4.873	14.233	13.128	-9.278	14.85	-0.738	10.282	-9.728	-46.923	4.427	-3.731	-9.421	4.773	1.103	-0.617	3.535	16.428	37.842	-11.358	-3.948	-1.23	1.728	28.489	-6.684	-2.616	-2.458	1.286	-0.526	45.784	27.099	19.515	22.98	8.868	0.908	-3.024	7.729	-6.506	-13.949	-13.641	0.087	-11.42	4.648	5.083
386	-21.819	53.4	-12.692	-32.692	15.229	3.668	5.558	14.685	13.489	-9.035	15.809	-0.52	11.167	-9.617	-46.22	4.644	-2.889	-9.075	5.334	1.023	0.168	3.636	17.5	38.696	-10.769	-3.836	0.281	2.869	29.024	-7.004	-1.959	-2.478	1.991	-0.469	46.467	27.161	19.933	23.073	9.046	0.802	-2.142	8.609	-5.929	-13.994	-14.24	0.568	-10.857	4.837	5.992
387	-24.094	53.4	-11.552	-32.569	16.04	3.605	6.747	14.453	14.858	-9.127	17.026	-0.115	12.339	-9.437	-45.458	4.588	-2.299	-8.747	6.334	1.038	1.26	3.973	18.043	38.128	-9.585	-3.716	1.173	2.353	30.573	-6.901	-1.061	-2.423	3.236	-0.294	47.308	27.419	21.473	23.544	10.062	0.781	-1.265	8.727	-4.537	-13.732	-12.981	1.084	-9.737	5.12	7.081
388	-21.819	53.4	-12.604	-32.494	15.159	3.814	6.024	14.114	13.219	-9.034	15.957	-0.373	11.138	-9.431	-46.485	4.457	-3.181	-8.523	5.165	0.6	0.492	3.747	17.661	38.632	-10.926	-3.801	0.208	1.997	29.57	-7.325	-2.17	-2.247	2.812	-0.36	46.543	27.29	20.709	23.467	8.538	0.84	-2.104	8.404	-5.14	-13.94	-14.138	0.915	-10.699	4.815	6.073
389	-24.094	53.4	-12.56	-32.569	15.1	3.347	6.871	13.754	13.399	-9.156	16.284	-0.759	11.083	-9.583	-45.964	4.41	-3.191	-8.421	5.404	0.429	0.762	3.774	17.8	38.216	-10.506	-3.996	0.425	2.13	29.862	-7.549	-2.408	-2.695	3.506	-0.737	46.347	27.478	20.675	23.334	10.119	0.959	-2.019	7.86	-4.759	-14.02	-14.65	1.043	-10.806	4.902	6.236
390	-21.819	53.4	-13.284	-32.607	14.599	3.762	5.625	13.995	13.15	-9.306	15.832	-0.665	11.087	-9.374	-46.404	4.389	-3.901	-8.348	4.823	0.28	0.443	3.678	17.249	38.336	-11.198	-4.134	-0.732	1.431	29.653	-7.681	-3.067	-2.94	2.328	-0.841	46.219	27.483	20.211	23.29	8.222	0.749	-2.34	7.659	-5.307	-14.117	-15.77	1.427	-11.455	4.884	5.609
391	-21.819	53.4	-13.027	-32.49	15.068	4.029	5.771	14.144	13.125	-9.137	16.465	-0.604	11.53	-9.406	-46.062	4.5	-3.911	-8.382	5.059	0.18	0.634	4.004	17.538	38.244	-10.958	-3.935	-0.394	1.53	29.989	-7.848	-2.619	-3.216	2.948	-0.557	46.757	27.702	20.327	22.857	8.781	0.941	-2.06	8.615	-4.945	-14.183	-15.255	1.241	-11.326	5.173	5.932
392	-21.819	53.4	-13.25	-32.536	15.194	4.323	5.931	13.996	13.113	-8.776	16.233	-0.525	10.951	-9.587	-45.506	4.471	-4.079	-8.414	5.178	0.422	0.51	4.166	17.618	38.487	-10.878	-3.869	-0.625	1.644	30.327	-8.184	-2.714	-3.322	2.729	-0.114	46.948	27.583	20.193	22.634	8.582	1.143	-2.174	7.553	-5.411	-14.185	-16.883	1.897	-11.652	5.283	6.06
393	-21.819	53.4	-13.455	-32.47	14.906	3.806	5.704	14.119	13.135	-8.83	16.607	-0.301	11.108	-9.663	-45.864	4.542	-4.169	-8.433	4.946	-0.047	0.5	3.965	17.389	38.127	-11.053	-3.823	-0.667	1.373	30.334	-8.359	-2.734	-3.52	2.566	-0.275	47.099	27.562	19.95	22.327	8.665	1.188	-2.535	7.674	-5.294	-14.209	-17.459	1.762	-11.723	5.415	6.044
394	-24.094	53.4	-13.071	-32.291	15.116	4.118	6.532	14.055	13.432	-8.705	16.971	-0.042	11.091	-9.765	-45.682	4.621	-3.848	-8.216	5.349	-0.095	0.918	3.829	17.951	38.652	-10.818	-3.864	-0.338	0.977	30.827	-8.238	-2.903	-3.39	3.186	0.106	47.396	27.571	20.055	22.049	9.041	1.053	-1.99	8.005	-4.616	-14.241	-17.759	2.093	-11.421	5.404	6.111
395	-24.094	53.4	-13.211	-32.165	14.768	3.943	6.225	14.245	13.341	-8.93	16.941	0.343	11.38	-9.724	-45.672	4.573	-4.06	-8.133	5.09	-0.235	0.892	3.933	17.832	38.626	-10.781	-3.867	-0.268	1.02	30.919	-8.291	-2.913	-3.833	3.913	-0.055	47.606	27.381	20.417	21.849	9.286	1.359	-2.066	7.366	-4.462	-14.227	-17.213	1.884	-11.403	5.589	5.997
396	-24.094	53.4	-13.119	-32.134	14.95	4.168	6.99	14.206	13.67	-8.739	16.661	0.407	11.716	-9.248	-46.677	4.591	-3.972	-7.948	4.974	-0.036	1.271	4.018	18.099	38.428	-10.518	-3.801	0.175	1.52	31.445	-8.39	-3.052	-3.904	3.74	0.15	47.257	27.677	20.634	21.751	9.723	1.317	-1.822	8.327	-4.327	-14.283	-17.259	2.278	-11.338	5.481	6.143
397	-24.094	53.4	-14.018	-32.261	13.833	4.315	6.492	14.123	12.794	-8.602	15.909	0.928	10.786	-9.335	-47.284	4.548	-5.287	-8.101	4.139	-0.329	0.241	3.916	17.712	39.118	-11.194	-3.867	-0.917	1.45	30.821	-8.589	-4.121	-3.883	3.874	0.213	46.67	27.857	19.732	21.812	8.517	1.403	-2.569	8.184	-5.02	-13.95	-18.483	2.393	-12.236	5.519	5.293
398	-21.819	53.4	-13.684	-32.419	14.499	4.692	6.701	14.119	12.989	-8.482	16.369	1.377	10.863	-9.534	-46.815	4.673	-4.803	-8.489	4.514	-0.507	0.515	3.477	18.153	38.832	-11.025	-3.752	-0.518	1.182	30.811	-9.053	-4.15	-4.158	3.971	0.165	46.772	27.596	20.013	21.624	9.341	1.358	-2.222	8.601	-4.692	-14.167	-18.372	2.44	-11.599	5.455	5.77
399	-21.819	53.4	-13.898	-32.493	14.29	4.506	7.395	13.695	12.288	-8.377	16.752	1.669	10.758	-9.794	-47.715	4.323	-5.453	-8.582	4.091	-0.491	0.229	3.107	17.831	38.857	-11.09	-3.876	-0.734	1.086	30.901	-9.132	-4.565	-4.55	3.12	0.024	46.647	27.605	19.581	21.759	8.726	1.213	-2.287	7.682	-4.904	-14.345	-17.636	2.152	-11.823	5.271	5.586
400	-21.819	53.4	-14.267	-32.353	13.749	4.57	7.208	13.639	12.269	-8.668	17.337	2.29	10.219	-9.814	-47.575	4.293	-5.708	-8.576	3.798	-0.515	-0.383	2.902	17.479	38.694	-11.47	-3.877	-1.058	1.061	30.653	-9.195	-5.293	-4.841	2.554	-0.048	46.419	27.61	18.881	21.654	8.557	1.202	-2.847	8.922	-4.858	-14.318	-18.805	2.347	-12.516	5.468	5.539
401	-21.819	53.4	-13.619	-32.103	14.404	4.108	7.898	13.335	12.695	-8.53	19.188	3.076	10.612	-9.916	-47.819	4.343	-5.001	-8.947	4.492	-0.633	0.496	2.826	18.175	38.581	-10.872	-3.882	-0.56	1.006	30.959	-9.459	-5.189	-4.908	3.755	0.203	46.709	27.681	19.446	21.966	8.621	0.958	-2.084	7.871	-4.338	-14.405	-18.697	2.619	-11.904	5.307	6.004
402	-24.094	53.4	-13.375	-31.779	15.004	4.688	8.821	13.371	12.849	-8.283	20.08	3.44	11.035	-9.957	-47.618	4.474	-4.858	-8.658	4.995	-0.139	0.659	2.994	18.656	38.847	-10.619	-3.889	0.038	1.217	31.746	-9.36	-4.969	-4.763	3.939	0.243	47.716	27.953	19.618	22.307	9.755	1.575	-1.612	7.52	-4.257	-14.351	-18.689	2.932	-11.744	5.461	6.522
403	-21.819	53.4	-13.269	-31.464	15.211	4.88	8.45	13.771	12.549	-7.81	20.86	4.244	11.678	-9.653	-46.997	4.659	-4.348	-8.418	5.451	-0.161	0.939	3.359	19.184	39.257	-10.292	-3.888	0.085	0.996	31.627	-9.324	-4.63	-4.992	5.142	0.561	47.853	28.15	20.397	22.649	9.89	1.578	-1.375	7.174	-3.237	-13.986	-18.453	3.067	-11.213	5.573	6.913
404	-21.819	53.4	-13.049	-31.654	15.682	4.805	9.378	13.555	12.966	-7.87	21.785	4.512	11.779	-9.829	-48.04	4.587	-3.657	-8.177	5.711	-0.17	1.109	3.429	19.585	38.747	-9.896	-3.821	0.718	1.46	32.123	-9.621	-4.654	-4.781	6.38	0.558	48.202	28.217	20.524	22.472	10.786	1.645	-1.049	7.456	-3.511	-14.121	-18.147	3.029	-11.094	5.602	7.387
405	-21.819	53.4	-13.606	-31.576	14.916	5.173	7.772	13.692	12.914	-8.42	21.472	5.012	10.573	-9.88	-46.978	4.746	-4.574	-7.846	5.2	-0.083	0.162	3.478	19.6	39.751	-10.599	-3.707	-0.109	1.319	31.241	-9.46	-5.789	-4.886	4.255	0.531	47.573	28.338	19.781	22.719	9.928	1.812	-1.64	7.899	-3.644	-13.722	-19.498	3.462	-11.847	5.701	6.413
406	-21.819	53.4	-13.977	-31.138	14.208	5.28	6.923	13.681	11.169	-7.527	21.222	4.978	9.699	-9.864	-48.461	4.497	-4.973	-7.933	4.548	-0.363	-0.626	3.194	18.628	39.43	-11.433	-3.728	-0.665	1.662	30.608	-9.774	-6.532	-4.515	4.215	0.559	47.325	28.475	18.591	22.52	8.873	1.812	-2.302	7.292	-4.602	-14.187	-20.156	3.304	-12.674	5.786	5.82
407	-21.819	53.4	-12.9	-30.704	15.139	5.812	8.078	13.599	12.704	-7.799	22.391	4.979	10.821	-10.006	-48.652	4.506	-4.063	-7.692	5.263	-0.211	0.451	3.099	20.008	39.788	-10.276	-3.709	-0.218	0.802	31.375	-9.909	-5.567	-4.584	4.257	0.804	48.343	28.517	19.833	22.752	9.761	1.728	-1.423	7.748	-3.596	-13.862	-18.196	3.26	-11.418	5.911	6.514
408	-24.094	53.4	-12.241	-30.539	15.943	5.351	9.088	13.407	12.692	-7.249	23.454	4.598	11.279	-10.188	-47.677	4.524	-3.253	-7.718	6.118	-0.101	1.115	2.811	20.51	39.332	-9.771	-3.711	0.148	0.585	31.986	-10.058	-4.892	-4.855	5.876	0.582	48.738	28.297	20.364	22.513	11.231	1.794	-0.774	7.33	-3.021	-14.018	-18.115	3.305	-10.952	5.725	7.046
409	-21.819	53.4	-12.85	-30.188	15.18	5.465	7.32	13.781	12.082	-7.368	22.64	4.625	10.651	-9.657	-47.903	4.379	-4.107	-7.666	5.28	0.001	-0.347	2.528	20.284	39.891	-10.741	-3.756	-1.052	-0.151	30.981	-10.199	-6.032	-5.077	4.908	0.426	48.095	28.118	19.524	22.304	9.815	1.757	-1.59	7.408	-3.542	-14.357	-18.578	3.091	-11.915	5.608	6.255
410	-21.819	53.4	-12.869	-30.209	14.971	6.006	7.503	13.562	11.691	-7.006	22.871	4.959	9.995	-9.819	-49.625	4.64	-4.289	-7.402	4.923	0.283	-1.021	2.68	19.332	39.456	-11.264	-3.69	-1.442	-0.028	30.973	-10.012	-6.703	-4.91	5.542	0.586	47.815	28.437	19.05	22.36	9.91	1.834	-1.807	7.01	-4.274	-14.238	-19.089	3.205	-11.779	5.841	5.939
411	-21.819	53.4	-12.508	-30.157	15.009	6.3	7.013	13.911	11.51	-6.932	23.294	5.153	9.821	-9.698	-49.734	4.41	-4.072	-7.448	5.226	0.362	-0.577	2.303	19.53	38.954	-10.819	-3.858	-0.994	0.581	31.078	-10.093	-6.968	-5.189	5.78	0.572	48.074	28.468	19.303	22.296	10.172	2.02	-1.685	7.483	-3.993	-14.214	-18.374	3.187	-11.639	5.54	6.078
412	-21.819	53.4	-13.081	-29.903	14.741	6.47	6.394	13.796	11.285	-6.779	22.808	5.394	9.042	-9.702	-50.19	4.37	-4.246	-7.288	4.471	0.311	-1.406	2.572	19.344	40.015	-11.573	-3.739	-1.613	0.605	30.516	-10.184	-8.019	-5.053	5.09	1.128	47.255	28.934	18.745	22.315	8.405	1.779	-2.446	7.598	-4.844	-14.319	-20.156	3.643	-12.261	5.649	5.783
413	-21.819	53.4	-12.15	-30.024	15.514	6.252	6.959	14.005	12.091	-6.778	24.025	5.45	9.799	-9.73	-49.359	4.503	-3.391	-7.351	5.457	0.226	-0.523	2.765	19.852	39.487	-10.35	-3.79	-0.518	0.523	31.757	-10.545	-7.038	-4.963	6.336	0.996	48.535	28.729	19.404	21.976	9.562	1.836	-1.39	8.977	-3.793	-14.511	-18.861	3.573	-11.288	5.546	6.585
414	-21.819	53.4	-12.682	-29.797	14.939	6.472	6.786	14.301	11.574	-6.36	23.678	5.674	9.038	-9.745	-51.202	4.089	-4.113	-6.933	4.607	0.273	-0.924	2.91	19.786	40.511	-11.091	-3.63	-1.554	0.288	30.985	-10.526	-7.755	-4.962	6.03	1.446	48.108	28.831	18.48	22.005	8.55	1.924	-1.716	8.626	-3.76	-14.362	-20.101	3.934	-11.871	5.577	6.174
415	-21.819	53.4	-12.564	-29.76	15.467	6.247	6.936	14.015	11.985	-6.647	23.951	5.687	9.507	-9.975	-51.307	4.143	-3.597	-7.201	4.948	0.042	-0.581	2.506	19.902	40.306	-10.92	-3.72	-0.954	0.052	31.613	-10.501	-7.952	-5.013	5.456	1.38	48.304	28.438	18.621	22.019	9.339	1.868	-1.532	8.789	-3.24	-14.361	-19.197	3.464	-11.988	5.718	6.422
416	-21.819	53.4	-12.343	-29.402	15.67	6.38	7.628	13.993	12.335	-6.545	24.412	5.819	9.661	-9.795	-52.413	4.103	-3.621	-6.882	5.41	0.189	-0.496	2.318	20.222	40.151	-10.672	-3.709	-0.871	0.18	31.785	-10.661	-7.857	-4.926	6.668	1.734	48.318	28.506	18.971	22.372	9.598	2.179	-1.266	9.089	-3.061	-14.354	-19.3	3.947	-11.417	5.592	6.609
417	-21.819	53.4	-12.798	-29.486	15.487	6.008	7.232	14.057	11.806	-6.247	24.598	5.601	9.207	-9.822	-54.413	3.978	-4.068	-7.102	5.391	0.079	-1.03	1.628	20.361	40.231	-10.705	-3.851	-1.172	-0.208	31.722	-10.445	-8.337	-5.275	6.355	1.333	48.158	28.338	18.562	22.101	9.549	2.173	-1.432	7.659	-3.283	-14.694	-20.3	4.164	-11.897	5.709	6.313
418	-21.819	53.4	-12.655	-28.773	15.853	6.675	7.587	14.377	12.514	-6.05	25.406	6.077	9.994	-9.617	-52.252	4.265	-3.785	-6.92	5.746	0.123	-0.955	1.128	20.676	40.216	-10.398	-3.709	-0.873	-0.288	31.996	-10.882	-7.997	-5.171	7.1	1.789	48.437	28.863	18.533	22.032	9.296	2.082	-0.99	8.306	-3.106	-14.557	-19.813	4.255	-11.479	6.027	7.093
419	-21.819	53.4	-14.05	-28.375	14.11	7.337	6.7	14.135	11.706	-6.249	24.404	6.481	8.758	-9.425	-54.961	5	-5.086	-6.751	4.647	0.079	-1.967	0.219	19.795	40.026	-11.269	-3.782	-1.967	-0.619	31.047	-11.024	-9.129	-5.442	6.133	1.635	47.487	28.477	16.96	21.873	8.878	2.441	-1.731	8.096	-4.592	-15.011	-20.456	4.062	-12.307	5.611	6.323
[truncated: 441 more columns]

## Sheet: 3B
EGF-0	EGF-20	Grad_on	Grad_off
0.115409	0.317372	0.120364	0.287436
0.12523	0.307003	0.241869	0.11397
0.0595718	0.270874	0.349162	0.105373
0.075209	0.0990161	0.448856	0.26133
0.0617902	0.0830944	0.586712	0.199436
0.0981914	0.0352747	0.456056	0.160781
0.0612106	0.114794	0.719905	0.161296
0.16839	0.0803206	0.569069	0.1448
0.0275418	0.124202	0.649258	0.161403
0.0328116	0.207431	0.548142	0.184145
0.0237685	0.0626921	0.302382	0.263971
0.166829	0.106038	0.0416823	0.11503
0.0341774	0.0886312	0.588838	0.224488
0.0016285	0.0289419	0.423235	0.481621
0.155878	0.166752	0.561175	0.199678
0.0267012	0.107435	0.320327	0.11845
0.032741	0.0876319	0.617506	0.266797
0.242477	0.280071	0.779986	0.571129
0.122064	0.132304	0.705823	0.564573
0.0437434	0.0349843	0.507664	0.0428684
0.0392826	0.0605081	0.240451	0.363572
0.0529599	0.113634	0.639324	0.212343
0.0589892	0.0636773	0.338666	0.0498534
0.0557005	0.055383
0.0445082	0.069814
0.153611	0.0656811
0.452886	0.0528787
0.0868809	0.0208936
0.144862	0.0149733
0.0211495	0.318934
0.0871659	0.0844294
0.0603979	0.316756
0.111446	0.181128
0.117866	0.254684
0.494338	0.235637
0.299373	0.485583
0.0403566	0.106558
0.00632288	0.0564256
0.0874912	0.097671
0.030227	0.0320001
0.105401	0.212163
0.314326	0.137267
0.0933728	0.285012
0.0367239	0.135678
0.245919	0.216125
0.197181	0.162734
0.084169	0.0431986
0.0924563	0.394559
0.171325	0.119155
0.148395	0.374639
0.0531789	0.245403
0.0964118	0.315129
0.338914	0.170238
0.0984334	0.2518
0.101779	0.0807195
0.301384	0.205377
0.01912	0.117936
0.0382751	0.0237936
0.195267	0.0406561
0.0348854	0.27031
0.119148	0.132415
0.20741	0.00686186
0.107345	0.00503371
0.285878	0.150681
0.0718882	0.0934571
0.108265	0.316512
0.164474	0.0746754
0.115711	0.445657
0.0516374	0.113117
0.0684507	0.272157
0.0575425	0.108661
0.241683	0.506036
0.0375636	0.0380854
0.0279738	0.00248961
0.064273	0.137538
0.0201317	0.19881
0.0887856	0.302079
0.0907451	0.080382
0.123039	0.143698
0.109192	0.164953
0.0879004	0.248547
0.0179231	0.175866
0.0312207	0.210986
0.158828	0.130361
0.239203	0.257351
0.0241001	0.0571945
0.210691	0.12965
0.018042	0.244474
0.13285	0.0189888
0.26109	0.191354
0.0473891	0.273281
0.0271993	0.399255
0.0564259	0.62398
0.28742	0.355936
0.186486	0.273293
0.0301858	0.599325
0.217708	0.448042
0.0988147	0.231536
0.120613	0.0730878
0.0702007	0.0455143
0.102694	0.158195
0.221168	0.0630441
0.183918	0.0177906
0.186236	0.300178
0.169214	0.18894
0.194076	0.146279
0.0261328	0.308688
0.369535	0.0778469
0.0525562	0.0918883
0.192047	0.105562
0.0527454	0.0694882
0.195164	0.199238
0.0207343	0.0981212
0.319496	0.108335
0.0229497	0.173148
0.164842	0.156993
0.0621308	0.242921
0.173066	0.0955176
0.0280097	0.0935293
0.218235	0.122826
0.0192372	0.203139
0.100747	0.096797
0.072572	0.187052
0.0609221	0.519255
0.415752	0.103379
0.365456	0.360999
0.164557	0.126086
0.00313898	0.121595
0.146877	0.18136
0.263533	0.0998958
0.0861916	0.202966
0.136285	0.169237
0.388425	0.185879
0.0743071	0.145204
0.0354449	0.20861
0.142336	0.0359501
0.186086	0.36603
0.131043	0.0324548
0.192511	0.223036
0.0943673	0.0451134
0.0460911	0.135632
0.141434	0.0925763
0.0329935	0.0802829
0.0744412	0.0489271
0.211531	0.241754
0.11046	0.0857458
0.0651155	0.034527
0.0187745	0.169148
0.071554	0.0109677
0.0365026	0.0789539
0.0554519	0.149819
0.059663	0.0901197
0.255996	0.0822124
0.0891834	0.0820632
0.286351	0.123129
0.0615818	0.376076
0.239508	0.195104
0.100001	0.0332104
0.0118189	0.044722
0.00535403	0.115478
0.139854	0.452578
0.0405677	0.0113819
0.0280022	0.0754119
0.119826	0.0925124
0.0418109	0.00881529
0.0502236	0.0875996
0.150498	0.0550973
0.0611262	0.0130774
0.0234475	0.0313558
0.0420123	0.0409098
0.0170553	0.154257
0.317931	0.164929
0.28956	0.397659
0.0302619	0.179298
0.0775665	0.139132
0.430151	0.0535415
0.0239496	0.0370615
0.0825934	0.191977
0.0851151	0.123941
0.106382	0.0461284
0.350602	0.0466581
0.0183836	0.145142
0.0235945	0.433149
0.0689991	0.118528
0.153223	0.0507715
0.0729551	0.204504
0.177721	0.0126939
0.166713	0.143474
0.28044	0.097671
0.040932	0.105572
0.170017	0.0507006
0.0229261	0.270046
0.348548	0.0601925
0.0353701	0.259204
0.108386	0.102775
0.0841536	0.174589
0.0896739	0.164986
0.167728	0.0536769
0.0160036	0.0308751
0.0115872	0.121415
0.0217971	0.148331
0.206871	0.255726
0.0286325	0.0261597
0.117065	0.0684569
0.222913	0.0456848
0.0564476	0.0550575
0.349669	0.175541
0.267584	0.054152
0.0777841	0.298585
0.193284	0.0693708
0.0772889	0.077759
0.0265366	0.109669
0.161045	0.496567
0.341499	0.119452
0.277008	0.0454749
0.0465904	0.147067
0.0603982	0.0105066
0.0703692	0.00919212
0.350577	0.512762
0.0720322	0.14741
0.257368	0.159029
0.176542	0.05038
0.153847	0.0201655
0.0276165	0.16925
0.115865	0.0964216
0.0662312	0.228313
0.260317	0.133488
0.0738879	0.107534
0.155468	0.123041
0.199691	0.0674778
0.0415197	0.117629
0.118436	0.124864
0.0409873	0.155441
0.0822115	0.0457927
0.202138	0.0512706
0.170837	0.194138
0.265019	0.112554
0.0542171	0.10656
0.0483374	0.0321104
0.0648073	0.0414026
0.0239017	0.105083
0.13653	0.112853
0.0831088	0.0245299
0.0705496	0.0329116
0.0328938	0.20912
0.121813	0.288641
0.0381331	0.0685453
0.186367	0.0286616
0.135075	0.0238596
	0.156719
	0.0675491
	0.199008
	0.0101523
	0.0366856
	0.0995928
	0.118352
	0.274591
	0.0666821
	0.194496
	0.275134
	0.0373641
	0.0481245
	0.227837
	0.0855917
	0.033142
	0.0511021
	0.00554697
	0.0307241
	0.177577
	0.0767829
	0.0331061
	0.0892525
	0.112535
	0.164461
	0.0106131
	0.0307551
	0.1741
	0.106842
	0.154617
	0.368871
	0.139236
	0.29131
	0.128544
	0.0635244
	0.0521937
	0.0988047
	0.061624
	0.294106
	0.0857204
	0.194366
	0.269611
	0.101376
	0.228846
	0.427698
	0.0119191
	0.0640975
	0.24627
	0.0727308
	0.0456687

## Sheet: 3C (top)
	Cell 0	Cell 1	Cell 2	Cell 3	Cell 4	Cell 5	Cell 6	Cell 7	Cell 8	Cell 9	Cell 10	Cell 11	Cell 12	Cell 13	Cell 14	Cell 15	Cell 16	Cell 17	Cell 18	Cell 19	Cell 20	Cell 21	Cell 22
0	1	0	-0.44646	-0.948949	-0.707107	-0.242055	0.832768	-0.980676	-0.708594	0.447214	0	0.447966	0.44646	-0.707107	-0.315828	0.277777				-0.17238	-0.681253	-0.946821	-0.525436
2	0.235307	-0.801011	-0.668619	-0.140866	-0.0480407	-0.339888	0.134521	-0.707107	-0.569348	0.447214	-0.623894	0.072101	0.44646	-0.707107	-0.316627	-0.95396				0.990738	0.130262	-0.282009	-0.997459
4	-0.707107	-0.894427	-1	0.6	0.242536	-0.447214	-0.707107	0.83205	-0.447214	0.707107	-1	-0.707107	0	0.447214	-0.707107	-0.976997		0	0	0.694136	0.421731	0.974708	-0.793711
6	-0.707107	-0.894427	-1	0.6	0.242536	-0.447214	-0.707107	0.83205	-0.447214	0.707107	-1	-0.707107	0	0.447214	-0.707107	0.900234		0		0.948683	-0.627679	0.210229	-0.779929
8		0	-0.447214	-0.707107	0	-0.83205	0	0.242536	-0.316228	0.83205	-0.447214	-0.707107	-0.141421	0.448157	-0.196514	-0.21693			-1	0.884035	-0.506766	-0.375705	-0.85621
10		0	-0.447214	-0.707107	0	-0.83205	0	0.242536	-0.316228	0.894427	-0.447214	-0.707107	-0.445328	0.447214	0	0		0.707107	1	0.448907	-0.882592	-0.861681	0.529999
12		0.316228	0.447214	-0.894427	-0.196116	-0.857493	0	0.164399	0.242536	0.894427	-0.447214	0.242536	-0.447214	0.447214	0	-0.982174	0			0.998233	-0.523624	-0.166031	-0.867693
14		0.447214	0.83205	-0.447214	-0.316228	-0.894427	0	0	0.894427	-0.707107		0.970143	0.447214	-0.948683	0	0.90129				0.958798	0.104008	-0.999232	-0.882353
16		0.447214	0.83205	-0.447214	-0.316228	-0.895368	0	0	0.894427	-0.707107		0.970143	0.445328	-0.948683	0	-0.620129		0	0.83205	-0.999549	-0.852052	0.854199	0.486702
18	0.707107	-1	-0.707107	0.707107	0.316228	0.316228	0.707107	0.895368	0	0.970143	-0.316228	-0.948683	0.707107	-0.8	0	-0.988913			1	0.994261	-0.0249922	-0.508833	-0.680584
20	0.707107	-1	-0.707107	0.707107	0.316228	0.316228	0.707107	0.894427	0	0.986394	-0.316228	-0.948683	0	-0.447214	0	0.607119		0.707107	0.707107	-0.521294	-0.406138	0.994766	0.781252
22	0	-0.447214	-0.8	0.242536	-0.242536	-0.196116	-0.707107	0.707107	-0.948683	0.986394	-0.707107	0.894427	0	-0.447214	0	-0.932923		0		0.9585	0.43044	-0.871248	-0.906081
24	-0.707107	-0.242536	-0.600506	-0.447214	-0.894427	-0.707107	-1	0	-0.948683	-0.948683	-0.707107	1	-1		0	-0.826927			0	0.550373	0.158678	0.861647	-0.0148132
26	-0.707107	-0.242536	-0.6	-0.447214	-0.894427	-0.707107	-1	0	-0.949016	-0.948683	-0.707107	1	-1		0	-0.977157		0		0.971785	-0.683646	0.987417	0.624695
28	0	-0.948683	1	0.707107	1	0	0.707107	1	0.708038	0	0.894427	-1	-0.707107	-0.948683	-0.447214	-0.885967		0	0	0.164399	-0.974521	0.852851	-0.972493
30	0	-0.948683	1	0.707107	1	0	0.707107	1	0.706175	0.707107	0.894427	-1	0.707107	-0.948516	-1	-0.91826		0	0	0.979715	0.680234	0.988954	-0.0958138
32	0	0	0.948683	1	0.707107	-0.707107	0.317229	-0.980581	0.316228	0.707107	0.707107	-0.894427	0.707107	-0.948683	-1	0.994309				-0.840615	-0.644597	0.242536	0.222261
34	0	0.948683	-0.707107	0.707107	0	-0.447214	-0.707107	-0.986394	-0.707107	0	-1	-0.5547	0.447214	0.196116	1	-0.824932	-0.970143	-0.707107		0.715729	0.815559	-0.798316	-0.780183
36	0	0.948683	-0.707107	0.707107	0	-0.447214	-0.707107	-0.986394	-0.707107	0	-1	-0.5547	0.445328	0.196116	1	0.132164		-1		-0.197636	-0.661201	0.308864	0.994004
38	0	-0.447214	0	-0.894427	0.447214	0.707107	0	0.970143	-0.705239	0	-0.70897	0	1	0.164399	0.83205	0.895073		-0.707107		0.995893	0.659733	0.936856	0.668179
40	0	-0.447214	0	-0.894427	0.447214	0.707107	0	0.970143	-0.707107	0	-0.707107	0	0.83205	0	0.447214	-0.612358		0		0.184109	0.955578	-0.999954	-0.983161
42	0.447214	-0.948683		-0.447214	-0.707107	0.707107	0.316228	0.970143	0	0	0	0.707107	0.83205	0	0.447214	-0.926947		1		0.960791	-0.120919	0.871152	0.956881
44	0.316228	-0.894427	0	0.316228	-0.894427		0.707107	0	0.707107	1	0.707107	0.707107	0.707107	0.948516	0.894427	0.998212				-0.0702486	0.940529	0.952815	0.995984
46	0.316228	-0.894427	0	0.316228	-0.894427		0.707107	0	0.705239	1	0.707107	0.707107	0.707107	0.948683	0.894427	-0.462421			1	0.664674	0.623227	-0.246835	-0.453843
48	0	0.970143	-0.707107		0.447214		0.447214	0	-1	0.707107		0	0.894427	0.83205	0.948683	-0.991703			0	0.323907	0.677558	0.855532	0.794481
50	0	0.970143	-0.707107		0.447214		0.447214	0	-1	-0.707107		0	1	0	1	-0.780869		0.447214		-0.283242	0.846524	0.823953	0.953931
52	0	0.894427	0.707107	1	0.6	0	0	-0.447214	1	-0.707107	-0.707107	0.316228	1	0	1	0.975716	0			0.772239	0.829576	0.992475	-0.842271
54		0	1	1	1	0	-0.242536	-0.5547	1	1	-0.707107	0.447214	0.970143	1	1	0.650791			0.707107	-0.0312348	0.987705	0.152941	-0.122264
56		0	1	1	1	0	-0.242536	-0.5547	1	1	-0.707107	0.447214	0.970143	1	1	0.981351				0.743456	0.423128	0.889093	0.985821
58	0	-0.707107	-0.707107	0	-0.447214	0.948683	0.707107	1		0.919145	0		1	0.980581	0.948683	-0.988372			0	0.575875	0.393713	0.966562	-0.579981
60	0	-0.707107	-0.707107	0	-0.447214	0.948683	0.707107	1		0.707107	0		0	0	0.707107	0.91856	1	-0.316228		-0.929129	0.802134	0.839666	0.787098
62	1	0.5547	0		0	0.6	0.196116	1	1	0.707107	-0.447214	-0.707107	0	0	0.707107	-0.471567			1	0.450371	0.846733	0.954574	0.687954
64	0.707107	0.83205	1	0	0.707107	0	-0.316228	1	1		-1	-0.707107	1	-1	0.707107	-0.867341			1	0.973007	0.836503	0.328101	0.992278
66	0.707107	0.83205	1	0	0.707107	0	-0.316228	1	1		-1	-0.707107	1	-1	0.707107	0.778198		0		-0.620703	0.901816	0.303953	-0.615554
68	-0.707107	-0.894427	1	1	0.707107	0.707107	-0.894427	0	0.707107	0.707107	0.894427	-0.894427	0.970143	0	0.83205	-0.966097		0		0.769994	0.898014	0.981922	0.106533
70	-0.707107	-0.894427	1	1	0.707107	0.707107	-0.894427	0	0.707107	0.707107	0.894427	-0.894427	0.948683	0.447214	0.894427	0.795432				0.811851	0.578284	0.358689	0.923742
72	0	-0.707107	0	0.894427	0	-1	-0.5547	0.447214	1	0.707107	0.894427	1	0.948683	0.447214	0.894427	0.997671	0.894427		0.707107	0.268917	0.991209	0.680451	-0.986695
74	1	0	-0.707107	0.707107	-0.707107	-0.894427	0	0.316228	0	1		0.970143	1	0.447214	0.970143	-0.917832	1		0	0.399664	0.651756	0.964224	-0.99981
76	1	0	-0.707107	0.707107	-0.707107	-0.894427	0	0.316228	0	1		0.970143	1	0.447214	0.970143	0.682533				0.519307	0.998861	0.934133	-0.934528
78	0.83205	-0.707107	-1	0	0.707107	0	0.447214	0	0.928477	0.894427	-0.242536	-0.707107	0.970143	0.894427	0.986394	0.750925		-1		0.907608	0.639812	0.843121	0.999576
80	0.83205	-0.707107	-1	0	0.707107	0	0.447214	0	0.928477	-0.447214	-0.242536	-0.707107	0.948683	1	1	-0.114624	0	0	0	0.877413	0.99998	0.939375	0.758378
82	0.447214	-0.447214	0.707107	-0.707107	0.316228	0.970143	0.515293	0.780869	0.83205	-0.447214	-0.6	-0.8	0.948683	1	1	0.952499		0	0	0.905495	0.905584	0.925215	0.0423349
84	-1	0	0.894427	-1	0	0.8	0.707107	0.928477	-1	0.447214	-1	-0.894427	0.707107	-0.707107		-0.907188			0	0.635707	0.96793	0.592422	0.936443
86	-1	0	0.894427	-1	0	0.8	0.707107	0.928477	-1	0.447214	-1	-0.894427	0.707107	-0.707107		-0.581623	0	0	0	0.229596	1	0.947236	-0.0945965
88	0	-0.447214	-0.447214	0.707107	0	-1	0	0	-1	0.970143	0.894427		0.948683	0	1	0.978637				0.92955	0.780869	0.809581	-0.0293991
90	0	-0.447214	-0.447214	0.707107	0	-1	0	0	-1	0.948683	0.894427		1	1	1	-0.830544	-0.707107		0	-0.365143	0.998836	0.770783	0.782601
92	0	-1	1	0.707107	1	-0.447214	-0.83205	1	0.707107	0.948683	0.447214	0	1	1	1	0.974218		1	0	0.973025	0.992882	0.754961	0.945125
94		-0.707107	0.6		0.948683	0.707107	-0.948683	0.83205	0.894427	0	-0.316228	0	0.894427	-1		-0.0525588	0	1	0	0.997227	0.926295	0.48544	-0.732793
96		-0.707107	0.6		0.949182	0.707107	-0.948683	0.83205	0.894427	0	-0.316228	0	0.893955	-1		-0.0682168		0.447214	0	0.208343	0.9893	0.979232	0.656676
98		0.980581	0.447214	0.447214	-0.894427	0	0.894427	1	0.894427	0.980581	0.707107		1	-1	0.894427	-0.963993		0	0	0.894014	0.993482	0.515319	0.931708
100		0.980581	0.447214	0.447214	-0.894427	0	0.894427	1	0.894427	0.928477	0.707107		0.707107		0.894427	0.999603	1		-0.447214	0.443087	0.827247	0.7149	0.99899
102	0	0.857493	0.707107	0.894427	-1	-0.447214	0.707107	0.948683	0.780869	0.928477	0	0.894427	0.707107		0.893955	0.748416		0.894427	0	0.85996	0.977508	0.892994	0.929271
104	0	0	1	0.705239	0	-0.707107	0.447214	0.705239	0.447214	0.447214	-1	0.894427		0.316228	0.707107	-0.103732			-0.447214	0.611246	0.984548	0.915904	0.890578
106	0	0	1	0.707107	0	-0.707107	0.447214	0.707107	0.447214	0.447214	-1	0.894427		0.316228	0.707107	0.864688	0.447214	1		0.93993	0.999217	0.919484	0.951593
108	-0.447214	-0.948683	-0.707107	0	0.5547		-1	0.447214	0.83205	0.316228	0	-1	0	0.6	0.894427	-0.950846		1		0.672041	0.794768	0.961276	0.905047
110	-0.447214	-0.948683	-0.707107	0	0.5547		-1	0.447214	0.83205	0	0	-1	0	0.894427	1	0.439027			0	0.921964	0.999483	0.712279	0.62194
112	0	-0.980581		0.948683	0.5547	0.83205	0.316228	1	0.894427	0	0.707107	-0.948683	0	0.894427	1	0.727013	0		-0.196116	0.899272	0.967521	0.99922	0.60704
114	0.707107	-0.707107	0.707107	0.83205		0.83205	0.5547	0.707107	-0.707107	0.707107	0.894427	-0.707107	0	1	0.707107	-0.135491				-0.0120473	0.612024	0.880198	0.945789
116	0.707107	-0.707107	0.707107	0.83205		0.83205	0.5547	0.707107	-0.707107	0.707107	0.894427	-0.707107	0	1	0.707107	0.841879	0	1		0.372321	0.96016	0.779947	0.640184
118	-0.894427	0.242536		-1		1	-0.707107	0.447214		0.83205	-1	0	0.707107	0.970143	0.707107	0.952525	0	0.707107	0	0.946829	0.247504	0.937729	0.050296
120	-0.894427	0.242536		-1		1	-0.707107	0.447214		0.894427	-1	0	0.447214	0.948683	0	-0.993151		0.707107		0.93401	0.973234	0.85657	0.770053
122	0	0.514496	0	-1	0.83205	1	-0.707107	1	0.707107	0.893955	0	0.707107	0.447214	0.948683	0	0.999219			0	-0.57558	0.412795	0.885365	0.982252
124	1	0.894427	0	-1	0.83205	1	-0.707107	0.961524	0.707107	0.8	0.707107	1	-1	-0.316228	-0.447214	-0.986394				0.890043	0.769072	0.578017	-0.563337
126	1	0.894427	0	-1	0.83205	1	-0.707107	0.961524	0.707107	0.8	0.707107	1	-1	-0.316228	-0.447214	0.810679	0		0	0.292895	0.496345	0.934246	0.98792
128		-0.83205	0.707107	1	-0.447214	0.83205	0.447214	-1	0.707107	0.780869	-0.948683	-0.707107	0	1	-0.894427	-0.0565133	0		1	0.97221	0.465975	0.992222	0.930973
130		-0.83205	0.707107	1	-0.447214	0.83205	0.447214	-1	0.707107	0.707107	-0.948683	-0.707107	0.316228	0.5547	-0.707107	-0.301131			0	0.776846	0.928107	-0.419455	0.33457
132	-0.707107	-0.447214	0.970143	0.894427	0.707107	1	0	1	0.948683	0.707107	-0.5547	-0.447214	0.316228	0.5547	-0.707107	0.983082			0	-0.271957	0.564466	0.495977	-0.151779
134	-0.707107	0.447214	0.894427	0.707107	1	0	-1	1	1	0	0.447214	0	0.707107	0.316228	0.970143	-0.931243		0.447214	0	0.606189	0.809276	0.0600683	0.791682
136	-0.707107	0.447214	0.893955	0.707107	1	0	-1	1	1	0	0.447214	0	0.707107	0.316228	0.970143	0.995037			0	0.95095	-0.858454	0.53609	-0.117635
138	0.707107	-1	0	0.6	-0.316228	0.707107	0.894427	0.928477	-0.447214	0.707107	0.83205	0	0.894427	1	0.970143	0.969699	0	1		0.578429	0.322064	0.0847998	-0.0949183
140	0.707107	-1	0	0.6	-0.316228	0.707107	0.894427	0.928477	-0.447214	0.707107	0.83205	0	1	0.5547		0.118213	0		-0.8	0.934851	0.975422	0.871164	-0.11027
142		-0.83205	0	0.371391	-0.242536	1	0.5547	0.970143	0.447214	0.707107	0.514496	-0.164399	1	0.5547		0.9042			0.707107	0.391555	-0.480984	-0.4106	-0.292504
144	-0.707107	-0.447214	0	-0.707107	0	0.992278	0	0.6	0.83205		0	-0.316228	-0.894427	-0.894427	-0.948683	-0.995634	0.707107	1		0.129339	0.598661	0.811251	-0.687745
146	-0.707107	-0.447214	0	-0.707107	0	0.992268	0	0.599326	0.83205		0	-0.316228	-0.894427	-0.894427	-0.948683	0.88506			-1	0.620482	-0.0465249	0.883884	0.398726
148	-0.447214	0	0.316228	0.707107	1	0.447214		0.447214	-0.707107	0.707107	0.707107	0.447214	0.447214	0.707107	0	0.344255		0	-0.707107	0.653901	0.343303	0.593897	0.661681
150	-0.447214	0	0.316228	0.707107	1	0.447214		0.447214	-0.707107	0.707107	0.707107	0.447214	0.948683	0.83205	1	-0.779669			-0.447214	0.718602	0.0942812	0.717819	-0.990073
152	0	0.894427	-0.707107	0.894427	0.707107	0.707107	-0.316228	0	1	0.707107	0	0	0.948683	0.8316	1	-0.894427	0.707107	0		0.741948	-0.758877	0.775943	0.874961
154	0.707107	0.707107	-0.447214	0	-0.893955	0	-0.316228	-0.707107	0.894427	0.707107	-0.70897	-0.707107	0.894427	0.970143	1	0.985145	1			0.930102	0.863912	0.94066	-0.555899
156	0.707107	0.708038	-0.446271	0	-0.894427	0	-0.316228	-0.707107	0.893955	0.707107	-0.707107	-0.707107	0.894427	0.970143	1	0.301131	1	1	0	0.802019	-0.998953	0.671519	0.649355
158	-0.707107	-0.707107	0.706175	0.447214	0.447214	0.707107	0.708038	1		0.894427	0.707107	0	0.980581	0.98387	0.970143	-0.536875			0.707107	0.586269	-0.811534	0.779585	0.852823
160	-0.707107	-0.707107	0.707107	0.447214	0.447214	0.707107	0.707107	1		1	0.706175	0	0.83205	1	0.707107	0.965159	0.707107	0	0.707107	-0.102462	-0.687339	0.994996	0.37485
162	-0.707107		0.8	0.948683	0.79924	0.707107	0.316228	0.988372	0.6	1	0.447214	0	0.83205	1	0.707107	-0.67199		0.447214	0	0.37485	-0.83005	-0.478352	0.379919
164		0.707107	0.894427	0.894427	0.948683		-0.707107	0.948683	0.600506	-1	-1		0	0.707107	0.707107	-0.944875		0.707107		0.68979	0.280092	-0.466759	-0.220078
166		0.707107	0.894427	0.894427	0.948683		-0.707107	0.948683	0.6	-1	-1		0	0.707107	0.707107	0.0870994				-0.681064	-0.996978	0.223119	0.779767
168	1	0	0.447214	0.707107	1	0.857493	0.5547	-0.857493	0.707107	0.707107	0.707107	-1	-0.447214	0.948683	0.447214	0.991431				0.400819	0.871797	0.996912	-0.50024
170	1	0	0.447214	0.707107	1	0.857493	0.5547	-0.857493	0.707107	0.948683	0.707107	-1	-0.707107	0.316228	0	-0.99948		0		0.114006	-0.967317	0.747138	0.697971
172	-1	0	0	0.5547	0.707107	1	0.707107	0.447214	0.707107	0.948683	0.316228	-0.948683	-0.707107	0.316228	0	-0.157356				0.972628	-0.991032	0.789863	0.991061
174	-1	0	-1	0.447214	0.447214	0.5547	1	0.986394		-0.707107	-0.707107	-0.707107	0.894427	0.707107	0	0.862852	0	0		-0.997054	-0.947155	-0.378155	0.999982
176	-1	0	-1	0.447214	0.447214	0.5547	1	0.986394		-0.707107	-0.707107	-0.707107	0.894427	0.707107	0	0.907009				0.404506	-0.948683	0.201938	-0.0518781
178	0.707107	0.707107	1	0.83205	0	0.707107	-0.707107	0.894427	1	0.707107	0.948683	0.707107	0.948683	0.894427	1	0.862341			0	0.845079	-0.65362	0.380112	0.203567
180	0.705239	0.707107	1	0.83205	0	0.707107	-0.707107	0.894427	1	0.707107	0.948683	0.707107	1	1	0.948683	-0.828927				-0.304296	-0.999168	0.840908	0.949985
182	0.707107	0.5547	1	0.707107	0.948683	0.989949	0.447214	0	1	0.707107	0.5547	0.447214	1	1	0.948683	0.808143		0	1	0.573913	-0.927753	-0.823508	-0.996546
184		0.242536	1	0	0.948683	0.857493	1	-1	1	0.948683	-0.242536	0	0	1	0	0.528374			1	0.496339	-0.909747	-0.0704564	0.816024
186		0.242536	1	0	0.948683	0.857493	1	-1	1	0.948683	-0.242536	0	0	1	0	0.648652		0.447214	0.970143	-0.997867	-0.995005	0.0234311	0.946517
188	0.894427	0.242536	-1	0	0.242536	0	0	0.894427	0.8	1	0.5547	-1	0.894427	0.83205	1	-0.99997	0		0	0.563055	-0.904912	0.821143	0.89143
190	0.894427	0.242536	-1	0	0.242536	0	0	0.894427	0.8	0	0.5547	-1	1	0.707107	0.894427	0.979987	1	1	1	0.752674	-0.841533	0.406851	0.0793339
192	0.894427	0	0	0.83205	0.857493	0.83205	0	0.913812	0.707107	0	0	0.707107	1	0.707107	0.894427	0.989728	1	0.707107		-0.984578	-0.996038	0.0425147	0.920212
194		-0.447214	0.5547	0.948683	0.970143	0.948683	0	0.928342	-1	-0.707107	-1	0.970143	0.707107	-0.5547	1	-0.533301			0.707107	0.792285	-0.927469	-1	-0.830272
196		-0.447214	0.555375	0.948683	0.970143	0.948516	0	0.928477	-1	-0.707107	-1	0.970143	0.707107	-0.5547	1	-0.197381			0.83205	0.0512148	-0.931536	-0.0630323	-0.561158
198	0	0	0	-0.447214		0.707107	0.242536	-0.242536	0.447214	0.894427	0.316228	-0.707107	1	0		0.57013			0.8	0.419778	-0.996694	0.841178	0.953495
200	0	0	0	-0.447214		0.707107	0.242536	-0.242536	0.447214	1	0.316228	-0.707107	0.447214	1	-1	0.960586				-0.998424	-0.723738	0.909381	-0.0995037
202	-1	0.196116	0.710838	0.948683	0.83205	0.447214	-0.447214	0.242536	0.316228	1	0.371391	-0.316228	0.447214	1	-1	0.966165		0.707107	1	0.925547	-0.150642	-0.957628	0.171341
204	-0.707107	0.707107	0.447214	0.970143	0.83205	0	-0.707107	1	0	-0.707107	0.447214	0.707107	0	0	1	-0.999771		0	0.707107	-0.799404	-0.572182	0.977176	-0.654763
206	-0.707107	0.707107	0.447214	0.970067	0.83205	0	-0.707107	1	0	-0.707107	0.447214	0.707107	0	0	1	0.999964		1	0.707107	0.00389102	-0.9775	0.129161	0.974112
208		-0.707107	0.894427	-1		0.371391	0.447214	0.894427	0.847998	1	0.948683	0	0.707107	0.894427	0.8	-0.997594		0	0	-0.0474043	-0.567613	0.768047	0.965555
210		-0.707107	0.894427	-1		0.371391	0.447214	0.894427	0.847998	0.894427	0.948683	0	1	0.553688	0.707107	0.858026		0	0.707107	-0.350892	-0.753287	0.361574	-0.86843
212	0.707107	0.707107	1	0	0.707107	0.768221	0.371391	0.928477	0.752577	0.894427	0.894427	0	1	0.5547	0.707107	0.705449			0.8	0.917438	0.552293	-0.527533	0.923446
214	0.707107	0.707107	0.948683	0.83205	0.707107	1	0.316228	0.707107	0	0	0.83205	0	0	0	0	0.970496	0.707107	0.707107	0.5547	-0.152057	-0.33035	0.77264	-0.569834
216	0.707107	0.707107	0.948683	0.8316	0.707107	1	0.316228	0.707107	0	0	0.83205	0	0	0	0	-0.999532		0	0.707107	0.134852	0.938188	0.192347	0.365548
218	-0.447214	-0.5547	0.707107		0.707107	0.707107	0	0.707107	0.980541	1	-0.316228	0.894427	0.948683	0.707107	0.707107	0.995667	0		0.447214	0.441119	-0.953751	-0.982662	0.573462
220	-0.447214	-0.5547	0.707107		0.707107	0.707107	0	0.707107	0.980581	0.707107	-0.316228	0.894427	0.948683	0.707107	1	0.779983		0.707107	0.894427	-0.996847	0.880471	0.998306	0.0333148
222	0	-0.196116	1	0.707107	0	1	0.894427	0.992278	0.961524	0.707107	0	1	0.948516	0.707107	1	0.213362	1	0.447214	1	0.985788	0.977414	-0.462929	0.106279
224	1	0.447214	0.948683	0.707107	-1	0.707107	0.707107	0.986394	0.894427	-1	0.242536	0.707107	0.707107	0	0.83205	0.609711		0.447214	0.447214	-0.570613	0.330863	-0.239752	-0.215491
226	1	0.447214	0.948683	0.707107	-1	0.707107	0.707107	0.986394	0.894427	-1	0.242536	0.707107	0.707107	0	0.8316	0.457285	1	1		-0.799103	-0.659686	0	0.905557
228	-0.894427	1		0.707107	0.948683	0.5547	0	1	0.316228	1	0.707107	1	0.707107	0.970143	0.8	0.813733				0.763266	0.671638	-0.391906	0.900099
230	-0.894427	1		0.707107	0.948683	0.5547	0	1	0.316728	1	0.707107	1	0.707107	0.894427	0.707107	0.750893		0	1	0.637814	-0.220826	-0.54294	0.999798
232	-0.707107	1	0	0.707107	1	0.707107	0.317229	0.980541	0.371391	1	0.707107	0.447214	0.707107	0.894427	0.707107	0.853941	0			-0.392505	0.917738	0.276762	-0.844819
234	0	1	0	0	-0.707107	0	1	0.928477	0.447214	0.894427	0	0	0.894427	0.707107	0.894427	-0.995037		0		0.824152	0.996591	-0.926143	0.687544
236	0	1	0	0	-0.707107	0	1	0.928477	0.447214	0.893955	0	0	0.894427	0.707107	0.894427	0.999201	0.894427		0	-0.280899	0.98909	-0.233715	0.479394
238	0	-0.83205	0.707107	0.447214	1	0.948683		0.986394	0.8	1	0.707107	0	0.948683	0	1	0.976575		0		-0.445376	0.894427	-0.480011	-0.998925
240	0	-0.83205	0.707107	0.447214	1	0.948683		0.986394	0.8	-0.707107	0.707107	0	0.447214	-0.316228	-0.707107	0.885994	0	0.242536	1	-0.718988	-0.953631	-0.0877515	-0.840827
242	0.83205	1	0.707107	0.83205	0.896306	0.989949	0	0.980581	0.8	-0.705239	1	0.894427	0.447214	-0.316228	-0.707107	0.999387		0		0.633841	0.973589	0.104083	0.214784
244	0.707107	0.894427		1	0.707107	1	0	-1	0.8	0.705239	0	1	0	0.83205	0.707107	0.833377		1		-0.675013	0.940724	0.635861	0.224013
246	0.707107	0.894427		1	0.707107	1	0	-1	0.8	0.707107	0	1	0	0.83205	0.707107	0.967252		0.316228	0	-0.85368	-0.850339	0.393919	0.812448
248	0	-0.83205	-0.894427	0	0	-0.948683	0	-0.447214	-0.447214	0.707107	1	-1	0.447214	1	0.707107	0.802462	1			0.989817	-0.233373	-0.260909	-0.550088
250	0	-0.83205	-0.894427	0	0	-0.948683	0	-0.447214	-0.447214	0.707107	1	-1	0.707107	0.447214	0.707107	0.34944	0	0	0	-0.480833	0.964764	-0.156814	0.96662
252	-0.316228	-0.316228	0.894427	0.242536	0	-0.83205	0	0.948683	0	0.707107	0.83205	-0.447214	0.707107	0.447214	0.707107	-0.952926		0.447214	0	-0.948309	-0.888187	-0.697687	-0.830854
254	-0.447214	0.894427	1	1		0	0	1	0.707107	0.970143	-0.447214	0.447214	0.447214	0.894427		0.988023		0	0	0.99035	0.570926	0.90883	0.99922
256	-0.447214	0.894427	1	1		0	0	1	0.707107	0.970143	-0.447214	0.447214	0.447214	0.894427		0.987902	0.707107			0.696313	0.989108	-0.812015	-0.58494
258	0.707107		0.707107	0.707107	1	0.800505	0.707107	0	0.980581	0.948683	0	0	0.707107	0.83205	0.894427	0.983755				-0.994557	0.909645	-0.22131	0.934052
260	0.707107		0.707107	0.707107	1	0.8	0.707107	0	0.980581	-0.447214	0	0	0.242536	0.707107	0.894427	0.985498	0.707107			0.579099	-0.980581	0.661885	0.392971
262	1	-0.5547	1	0.83205	0.948683	0.894427	0.894427	1	0.948516	-0.447214	0	0.707107	0.242536	0.707107	0.894427	0.863971			0	-0.436384	0.98823	0.991844	0.924357
264	0	-0.5547	0.894427	1	0.707107	1	0	0.980581	0.707107	0.707107	0	0.894427		0.707107	0	0.999402		0		0.984068	0.887379	-0.334218	-0.511166
266	0	-0.5547	0.894427	1	0.707107	1	0	0.980581	0.707107	0.707107	0	0.894427		0.707107	0	-0.965843	1			-0.833281	-0.999056	0.998818	0.704345
268	0.707107	0.894427	1	0.707107	0	-0.447214	0.553688	1	0	0.83205	1	1	1	0.894427	0.970143	0.976004	0.707107	0		0.974692	0.893923	0.99991	0.994543
270	0.70897	0.894427	1	0.707107	0	-0.447214	0.5547	1	0	0.894427	1	1	1	0.894427	1	0.998715				-0.910782	-0.968863	0.971339	-0.43479
272	0.707107	0.83205	0.980581	0.447214	1	0.707107	0.447214	0.857493	0.780869	0.894427	1	1	1	0.894427	1	0.980832				0.666795	0.444518	0.911426	0.7661
274	0.707107	0.316228	0.970143	-0.707107	0.707107	1	0	0.5547	0.980581	-0.894427	-1		0.707107	1	-1	0.546789		1		-0.192588	-0.116841	-0.750473	0.997174
276	0.707107	0.316228	0.970143	-0.707107	0.707107	1	0	0.5547	0.980581	-0.894427	-1		0.708038	1	-1	0.831042	0	0		0.749726	0.553483	0.390016	0.945029
278	-0.707107	-0.83205	-1	0.948683	0.894427	0.555375		1	0.514496	0.707107	0.948683	0.707107	0.707107	0.948683	0	0.654447			0	-0.939709	-0.0856711	0.517962	0.501718
280	-0.707107	-0.832724	-1	0.948683	0.894427	0.5547		1	0.514496	0.83205	0.948683	0.707107		0.707107	0.316228	0.965589	0			0.977201	-0.461763	-0.202606	-0.61923
282	-1	-0.707107	-0.447214	0.316228	1	0.919145	0.707107	0.948683	0.707107	0.83205	0.980581	0.707107		0.707107	0.316228	0.997785		0		-0.477513	-0.764445	0.261951	-0.529595
284	-0.894427	1	0.447214	-0.708038	-0.707107	1	0.707107	-0.894427	-0.447214	1	1	0.707107	0	0	0.894427	0.807289		1		-0.0292273	-0.997656	0.823821	0.979483
286	-0.894427	1	0.447214	-0.707107	-0.707107	1	0.707107	-0.894427	-0.447214	1	1	0.707107	0	0	0.894427	0.975827		0.447214		0.109364	-0.552625	0.619025	-0.39164
288	1	0.708038	0.980581		-1	1	-1	0.707107	0.83205	1	0.5547	0.316228	0.707107	0.196116	0.707107	0.968374				0.211454	-0.904086	-0.833154	0.997308
290	1	0.707107	0.980581		-1	1	-1	0.707107	0.83205		0.5547	0.316728	0.707107	1	0	0.999918		0		-0.604828	-0.573078	-0.152866	-0.381919
292	0.948683	0.83205	1	0.707107	0.707107	0.989949	0	0.707107	0.948683		0.447214	0.894427	0.707107	1	0	0.99244				-0.993387	-0.991569	0.461796	0.994389
294	0.894427	1	-0.707107	0.707107	0.894427	0.707107	0.707107	-0.707107	0	-0.707107	0	0.948516	0.832724	0.447214	0.316228	0.829186				0.999661	-0.577236	0.914661	0.905931
296	0.894427	1	-0.707107	0.707107	0.894427	0.707107	0.707107	-0.707107	0	-0.707107	0	0.949182	0.83205	0.448157	0.316228	-0.407651	1	1		-0.424434	-0.99083	0.673634	0.785075
298	0.707107	-1	0.894427	-0.316228		0.5547		0.894427	0		1	0.707107	0.5547	0.895368	0.5547	0.877529		0		-0.911617	0.78988	0.54738	-0.109697
300	0.707107	-1	0.894427	-0.316228		0.5547		0.894427	0	0.707107	1	0.707107	-0.707107	0.6	1	0.688844		0.894427		0.996194	-0.985235	0.71749	0.945758
302	0.8	0.707107	-0.894427	0.447214	1	0.970143	0.8	0.6	0.970143	0.707107	0.970143	0.948683	-0.707107	0.6	1	0.998448	1	0		-0.842541	-0.629422	0.964205	0.46773
304	0.894427	0.948683	-1	0.894427	1	0.447214	0.8	-0.164399	0.624695	1	0.894427	0.708038	0.707107	-0.316228	0.707107	0.397918	0.447214	0.447214		0.00485431	-0.836503	0.257948	0.99152
306	0.894427	0.948683	-1	0.894427	1	0.446271	0.8	-0.164399	0.624695	1	0.894427	0.707107	0.707107	-0.316228	0.707107	0.998773				-0.367928	-0.447214	0.363542	-0.892486
308	0.5547	-0.707107	0.948683	-0.707107	0	0.707107	-0.707107		1	0.447214	1	0	1	-0.242836	0.894427	0.973659		0.447214		0.847998	0.325248	-0.166531	0.989681
310	0.5547	-0.707107	0.948683	-0.707107	0	0.707107	-0.707107		1	-0.447214	1	0	0.948683	-0.196116	1	0.551987	0	1		0.23102	-0.918239	0.549794	-0.707107
312	0.894427	1		0.447214	0.707107	0.948683	-0.707107	0.447214	1	-0.447214	1	0.70897	0.948683	-0.196116	1	0.286706		0		-0.763386	-0.544988	-0.672392	0.58606
314	0.894427	0.894427	-0.948683	0.894427	0.447214	0		0.447214	1	0.970143	1	0.894427	-0.447214	0.371391	1	0.536204		0		0.983245	-0.442519	0.733713	0.145828
316	0.894427	0.894427	-0.948683	0.894427	0.447214	0		0.447214	1	0.970143	1	0.894427	-0.447214	0.371391	1	0.0290334				0.818753	-0.802365	-0.999984	-0.0187702
318	0.707107	0	0.894427	-0.447214	-0.447214	1	0.316228	0.980581	1	0.948683	0.894427	-0.316728	0.316228	0.496139	0	0.912874				0.149108	0.870713	0.794519	0.622062
320	0.707107	0	0.894427	-0.447214	-0.447214	1	0.316228	0.980581	1	-1	0.894427	-0.316228	0.894427	0.707107	-0.196116	0.485164	1			-0.996781	-0.677309	0.661705	-0.745697
322	0.970143	0	0.936329	0	1	0.948683	0.242536	0.707107	0.707107	-1	1	0.447214	0.894427	0.707107	-0.196116	-0.853704	0.894427			0.00384613	-0.769726	-0.941479	-0.875476
324	0.83205	0	1	0.316228	0.894427	0.894427	0	-0.707107	0	-1	0.894427	0.894427	0	0	0	0.995082		0.894427		0.789788	0.60866	0.110714	0.994972
326	0.83205	0	1	0.316228	0.894427	0.894427	0	-0.707107	0	-1	0.894427	0.894427	0	0	0	0.904819				-0.405154	-0.963184	0.00396822	0.785193
328	0	0.707107	-0.447214	1	1	0.83205	-0.707107	-0.894427	1	0.707107		0.707107	0	0	0.707107	-0.50702				-0.934963	0.972371	-0.645232	0.808894
330	0	0.707107	-0.447214	1	1	0.83205	-0.707107	-0.894427	1	0.894427		0.708038		0	0.707107	0.449898				0.800371	-0.810317	0.716926	-0.0459285
332	0.447214	0.5547	0.948683	0	-1	0.928477	-0.316228	-0.980581	0.986394	0.894427	0.707107	0.894427		0	0.707107	0.66791				-0.923157	-0.99789	0.203353	0.49773
334	0.705239	0.447214	0.8	-0.707107	-1	1	0	-1	-0.707107	1	0.707107	0	0		0.707107	0.296627	1	1	-0.8	0.498694	-0.999254	-0.654334	0.990395
336	0.707107	0.447214	0.8	-0.707107	-1	1	0	-1	-0.707107	1	0.707107	0	0		0.707107	-0.81536		0.707107		-0.976993	0.968147	-0.578196	0.950855
338	0.447214	0	-0.83205	0.707107	1	-0.5547	1	1	1	0.948683	0.83205	1		0.707107	0.948683	0.995647				0.841912	-0.472357	0.306337	-0.300286
340	0.447214	0	-0.83205	0.707107	1	-0.5547	1	1	1	0.894427	0.83205	1	0	0.707107	0.706175	0.673754		1		0.255893	-0.486241	0.997123	0.961608
342	0.894427	0.707107	0	1	0.928477	-0.707107	1	0.894427	0.980581	0.894427	0.707107	0.894427	0	0.707107	0.707107	-0.982447	0			0.587291	-0.921714	0.20414	0.952586
344	0.6	0.707107	1	0.894427	0.894427	0	1	0.707107	0.970143	0.5547	-1	0	1	-0.707107		0.408477				0.140114	-0.0189839	-0.998146	0.136448
346	0.6	0.707107	1	0.893955	0.894427	0	1	0.707107	0.970143	0.554363	-1	0	1	-0.707107		-0.870861		1		0.00732581	-0.665206	0.777043	-0.208501
348		-1	-0.316228	-0.316228	-0.447214	1	-0.707107	0	0	0.371391	0.894427	0	0.707107	-0.83205		0.959154				0.990492	-0.462834	-0.726889	0.33441
350		-1	-0.316228	-0.314729	-0.447214	1	-0.707107	0	0	0	0.893955	0	0	-0.894427		-0.928089				-0.657215	-0.661863	-0.968918	-0.589416
352	0.242536	-0.948683	-0.447214	-0.447214	-0.707107	0.707107	0	0.707107	0.707107	0	0.948683	1	0	-0.894427		0.925431				-0.327709	0.861366	0.776612	0.541274
354	0.242536	0.707107	0	-0.707107	0	-0.970143	0.447214	0.316228	0.447214	0.447214	0.447214	0.894427	1	0.894427	0.707107	0.363542				-0.981393	-0.973224	-0.967307	-0.918763
356	0.242536	0.707107	0	-0.707107	0	-0.970143	0.447214	0.316228	0.447214	0.447214	0.447214	0.894427	1	0.894427	0.707107	-0.309345		1		0.992423	0.421111	0.92	0.985594
358	-0.242536	0.8	-0.707107	1	0.894427	1	-0.948683	0.5547	-0.447214	-0.316228	-0.316228	0.707107	1	1	1	0.987949		0		0.968833	-0.998141	-0.465746	-0.66495
360	-0.242536	0.8	-0.707107	1	0.894427	1	-0.948683	0.5547	-0.447214	-0.894427	-0.316228	0.707107	1	-0.707107	0.707107	-0.834662				-0.596215	-0.998783	-0.573462	-0.788476
362		0.707107	-1	0.707107	1	0.857493	0	0	-0.316228	-0.894427	0.707107	1	1	-0.707107	0.707107	-0.526355				-0.907767	0.794903	0.827634	0.888927
364	0.242536	-1	0	-0.705239	-0.83205	0.8	1	-1	0	1	0.980581	0.707107	-0.707107	-0.447214	-0.707107	0.948683			0	0.512122	-0.953231	-0.948018	0.999477
366	0.242536	-1	0	-0.707107	-0.83205	0.8	1	-1	0	1	0.980581	0.707107	-0.707107	-0.447214	-0.707107	-0.836788			0	-0.683376	-0.750624	0.982932	-0.999686
368	1	0.970143	0.894427	-1		-0.707107	-1	-0.894427	1	0.948683		-1	-0.447214	-0.707107	-0.707107	-0.867253		0		0.492579	-0.427195	0.873956	0.312018
370	1	0.970067	0.894427	-1		-0.707107	-1	-0.894427	1	0.928477		-1	0	0	-0.707107	-0.497512				-0.941773	-0.902134	0.0821391	0.999918
372		0.242536	0.447214	0.707107	0.707107	0	-0.83205	-0.707107	0.948683	0.928477	0	-1	0	0	-0.707107	-0.980581				0.97335	-0.99509	-0.482839	-0.899458
374	-1	-0.706486	-1	0.894427	0.707107	0.894427	0	0.447214	-0.707107		0		0.894427	0.707107	1	-0.846039	1			-0.830807	0.993756	0.990191	0.83921
376	-1	-0.707107	-1	0.893955	0.707107	0.894427	0	0.447214	-0.707107		0		0.894427	0.707107	1	-0.93356		-0.707107		0.93867	-0.402739	-0.188847	-0.736711
378	0.6	0.707107	0	0.447214		0.447214	0.707107	0	1	-0.707107	0.447214	-0.447214	0.948683	0.894427	1	-0.649194				-0.55525	-0.603443	-0.875615	-0.315327
380	0.600506	0.707107	0	0.448157		0.447214	0.707107	0	1	-0.707107	0.447214	-0.447214	0.447214	0.707107		-0.616473				0.990218	-0.894427	0.966205	0.78207
382	0.83205	-0.316228	0.970143	0.5547	0.948683	0	1	0.316228	1	-0.707107	0.948683	0.707107	0.447214	0.707107		-0.755689				0.396436	-0.722873	-0.643762	-0.420871
384	0	-0.707107	0.8	0.707107	0.948683	-1	0.707107	0.707107		0.780869	0.894427	0.894427		-1		0.0461048				-0.990454	-0.794079	0.0717103	0.970655
386	0	-0.707107	0.799621	0.707107	0.948683	-1	0.707107	0.707107		0.780869	0.894427	0.894427		-1		0.994359		0		0.931008	0.936011	-0.999718	-0.704261
388	0	0.857493		0	-0.948683	0.948683	-1	0	0.707107	0.707107	-1	0.894427	1	-0.948683	0.707107	-0.992366				-0.372777	-0.946617	-0.959115	0.976356
390	0	0.857254		0	-0.948683	0.948683	-1	0	0.707107	0	-1	0.894427	1	-0.707107	0.707107	0.802043				-0.135917	-0.676271	0.768221	0.967146
392	0.894427	0.5547	-1	0	-0.970143	0.928477	-1		0.8	0	-0.707107	0.707107	1	-0.70897	0.707107	-0.947648		0		0.990871	0.986059	-0.900415	-0.720499
394	0.8	-1	-1		-0.447214	0.894427		0	0.894427	-0.83205	0	0	-0.707107	-0.447214	0	0.281754		1		0.650382	0.890344	-0.621192	0.753773
396	0.800505	-1	-1		-0.447214	0.894427		0	0.894427	-0.83205	0	0	-0.707107	-0.447214	0	-0.68713		0		-0.275949	-0.982952	0.874791	0.367659
398	0	0.705239	0.894191	0.707107	0	-0.894427		-0.707107	-0.948683	0.970143	0.707107	-0.316228	-0.707107	-0.5547	0.707107	0.999717	0			0.164868	0.758185	-0.131381	0.426646
400	0	0.707107	0.894427	0.707107	0	-0.894427		-0.707107	-0.948683	0.989949	0.707107	-0.316228		-0.707107	0.5547	-0.742909		0		-0.525493	0	0.918728	-0.851424
402	-0.316228	0.980581	1	-0.707107	1	-0.707107	0.707107	-1	-0.707107	0.989949	0.707107	0.5547		-0.707107	0.5547	-0.994207	0			-0.845864	-0.848379	0.447214	-0.60955
404	-0.707107	1	0	-0.707107	0.707107	1	0.707107	0	1	-0.894427		1	0.894427	0.707107	-0.447214	-0.327111				-0.0910114	0.769758	-0.561501	-0.88175
406	-0.707107	1	0	-0.707107	0.707107	1	0.707107	0	1	-0.894427		1	0.894427	0.707107	-0.447214	0.465476		0	0	0.370621	-0.475149	0.687311	0.937375
408	0	-0.707107		0		0	-0.894427	1	-1	0	0.447214	0.705239	0.707107	0.5547	0.707107	-0.926501				-0.196116	0.257111	-0.531052	-0.995979
410	0	-0.707107		0		0	-0.894427	1	-1	0.970143	0.447214	0.707107	-0.948683	0.447214	0.5547	0.957488				0.647799	0.929741	-0.523493	0.607554
412	0.447214	0	1	0.447214	0.447214	0	-0.707107		-0.707107	0.970143	0.447214	-0.5547	-0.948683	0.447214	0.5547	-0.715157		0		0.267441	-0.992646	0.92326	-0.921797
414	0.316228	0.5547	1	0.316228	0.447214	0	1	-1	0.707107	0.242536	-0.447214	-0.8316		-0.948683	-0.894427	-0.390665				0.603049	0.697219	0.9675	0.825708
416	0.316228	0.5547	1	0.316228	0.447214	0	1	-1	0.707107	0.242536	-0.447214	-0.83205		-0.948683	-0.894427	0.755033	-1	1	0	-0.999701	-0.648246	-0.999719	-0.05547
418		-0.857493	-0.970143	0.894427	-0.707107	0	-1	0	0.6	0	-1	0.5547	0.707107	-0.707107	-0.707107	-0.799278				-0.592897	-0.798905	0.198847	0.103831
420		-0.857493	-0.970143	0.894427	-0.707107	0	-1	0	0.6	-0.447214	-1	0.5547	0.707107	0.707107	1	-0.0926234				0.753588	0.987241	0.952659	0.964764
422	0	-1	-1	0.707107		0.316228	0	-1	0.242536	-0.447214	0.707107	0.447214	0.707107	0.707107	1	-0.476885				-0.24689	-0.996921	-0.925264	0.476521
424	0	0.8	0.707107	0	0.707107	0.707107	0.707107	-0.707107	-1	0.707107	0.894427	-0.707107	-1	0		0.961106				-0.44961	0.847064	0.161229	-0.825842
426	0	0.8	0.707107	0	0.707107	0.707107	0.707107	-0.707107	-1	0.707107	0.894427	-0.707107	-1	0		-0.851658	-1			0.881558	0.245283	-0.866386	0.839932
428		0.894427	0.948683	0.316228	0	0.707107	-1	-0.447214	-0.948683	1	0	-0.707107	-1	-0.780869	-1	-0.773502				-0.489867	-0.999992	0.983382	0.058722
430		0.894427	0.948683	0.316228	0	0.706175	-1	-0.447214	-0.948683	0.707107	0	-0.707107	1	-0.980581	-1	0.872416				0.311551	-0.95762	-0.716726	0.0989879
432	0.894427	0.707107	1	0.242536	0.894427	-0.240131		-0.980581		0.707107	1	1	1	-0.980581	-1	0.0388057				-0.983344	-0.0742625	-0.0384331	-0.998233
434	0.894427	-0.707107	0.980581	0	0.707107	-0.83205	1	-0.8	0.948683	0	0.707107	0.948683		0.707107	0.970143	-0.685172				0.999129	-0.780198	-0.708157	0.418608
436	0.894427	-0.707107	0.980581	0	0.707107	-0.83205	1	-0.8	0.948683	0	0.707107	0.948516		0.707107	0.970143	-0.709421	0			-0.95797	-0.77159	-0.0541078	0.263117
438	-0.707107	0.948683	-0.894427	1	0.707107	0	1	-0.447214	1	-1	0.707107	0		-0.196116	0.83205	-0.6		1		0.489511	0.993573	-0.215696	-0.876646
440	-0.707107	0.948683	-0.894427	1	0.707107	0	1	-0.447214	1	-0.707107	0.707107	0		-0.707107	-0.707107	-0.373177				0.518174	0.126428	0.606224	0.125492
442		0	-1		-0.948683	0.894427	0.707107	0.242536	0.443436	-0.707107	1	0		-0.707107	-0.707107	-0.991061				0.423795	-0.847683	0.998006	0.957178
444	0.707107	-0.83205	-0.707107	-1	-1	0.894427	0	0.707107	-0.445328		0.707107			0.707107	1	-0.948683		0		-0.450563	0.0691411	-0.987969	-0.992535
446	0.707107	-0.83205	-0.707107	-1	-1	0.894427	0	0.707107	-0.447214		0.707107			0.707107	1	0.903426				-0.652669	-0.752739	0.0867366	-0.948683
448	1	0	0.894427	0	0.707107	0.707107	0.447214	1	0.707107	1	0.5547	-1	0.970143	0.242536	0.948683	-0.902639				-0.21742	-0.944986	-0.355629	-0.688749
450	1	0	0.894427	0	0.707107	0.705239	0.447214	1	0.705239	1	0.5547	-1	0.970143	0	0.707107	-0.860427		1	0	0.6334	0.879543	-0.913517	0.872228
452	0.894427	-0.707107	0.970143	0.707107		0.707107	0.948683	0.894427	0	1	0.8	0	0.970143	0	0.707107	-0.375564			0	-0.997777	-0.92122	0.884304	0.999452
454	0.83205	-1	0	1	-0.707107		0.5547	0.707107	-0.315227	1	1	0.316228	-0.894427	-1		-0.014597	0.707107			0.769664	0.229039	-0.884586	-0.775518
456	0.83205	-1	0	1	-0.707107		0.5547	0.707107	-0.316228	1	1	0.316228	-0.894427	-1		-0.954769		1		0.0849494	-0.678855	-0.0152267	-0.927067
458	-1	0.5547	1	1	0	0.316228	-0.707107	-0.986394	1	1	0.707107	0.447214	0	-0.948516		0.264235		0.707107		-0.0173585	0.8	-0.433689	0.862781
460	-1	0.5547	1	1	0	0.316228	-0.707107	-0.986394	1	-1	0.707107	0.447214	0.707107	-0.83205		-0.189117				-0.172148	-0.854661	0.00429181	0.864625
462	-0.707107	1	0.970143	0.707107	0.894427	0.894427	-0.894427	-1	0.707107	-1	1		0.707107	-0.83205		-0.999429				-0.982287	-0.560119	-0.287962	-0.310893
464	0.707107	-0.316228	0.707107	0	1	0.447214	0	0	-0.447214	-0.447214	0.447214	-0.447214		0.316228	-0.894427	-0.860622	-1		-0.316228	0.887008	-0.96642	-0.878503	0.695795
466	0.707107	-0.316228	0.707107	0	1	0.447214	0	0	-0.447214	-0.447214	0.447214	-0.447214		0.316228	-0.894427	0.726527				-0.804036	-0.736128	0.237869	-0.999027
468	-0.894427	1		0.447214	-0.707107	0.707107		0	0.447214	0	-0.894427	0	-0.707107		0	-0.998387				-0.974461	0.0367399	0.384829	0.683832
470	-0.894427	1		0.447214	-0.707107	0.707107		0	0.447214	0.707107	-0.894427	0	-0.707107	-0.316228	1	-0.981942		1		0.999317	-0.939793	0.907467	-0.621601
472	-1	0	0.447214	0.5547	0			0.447214	1	0.707107	-1	0	-0.707107	-0.316228	1	0.314654				-0.778508	0.999898	0.373129	-0.684286
474	0.707107	-0.83205	0.447214	0.707107	0.707107	-0.707107		0.316228	0	0.707107	-0.707107	0	0.707107	-1	0	-0.725101				-0.967027	-0.60745	0.273626	0.849138
476	0.707107	-0.83205	0.447214	0.707107	0.707107	-0.707107		0.316728	0	0.707107	-0.707107	0	0.707107	-1	0	-0.970631				0.988189	-0.72032	0.934998	-0.882544
478	0	0.707107	-0.707107	0	0.707107	0.970143	0	-0.894898	0.447214	0.447214	0.447214	0.707107	0	-1	-1	-0.73784				-0.689855	-0.696786	0.942151	0.95324
480	0	0.707107	-0.707107	0	0.707107	0.970143	0	-0.894427	0.447214	0	0.447214	0.707107	-0.894427	-1	-0.447214	-0.858713				0.785166	-0.976332	-0.899508	-0.921748
482	0.707107	1	1	1	0.894427	0.707107	1	-0.894113	-0.242536	0	1	0.447214	-0.894427	-1	-0.447214	0.417626				0.422072	-0.112489	0.988573	0.848651
484	1	0.948683	0.948683	0.948683	0.447214	-1	0.707107	-0.894427	-0.707107	0	0	0	0.948683	-0.447214	0.5547	-0.980581				-0.450769	-0.664364	-0.680198	-0.844757
486	1	0.948683	0.948683	0.948683	0.447214	-1	0.707107	-0.894427	-0.707107	0	0	0	0.948683	-0.447214	0.5547	0.738956				-0.99703	0.583636	-0.699207	0.924326
488	0.707107	-1	-1	0.242536	0.894427	0.894427	0.707107	-0.707107	0	0.447214	-0.242536	-0.894427	-0.707107	-0.707107	1	-0.663035				0.866704	-0.619045	-0.483612	-0.927316
490	0.707107	-1	-1	0.242536	0.894427	0.894427	0.707107	-0.707572	0	0.707107	-0.242536	-0.894427	-0.894427	-0.895368	-0.316228	-0.823648				-0.964725	0.946882	0.62113	0.345832
492	0.89348	1	-0.948683	-0.514496	0.5547	1	0.707107	-0.83205	1	0.707107	0.316228		-0.894427	-0.894427	-0.316228	0.537984	-0.894427			0.96806	-0.985312	0.773957	0.366885
494	0	1	0	-0.970143	0	0	0.707107	-1	0.707107	0.707107	0.894427	0.894427	0.83205	0	0	0.0715649				0.831407	0.921538	-0.794358	0.973877
496	0	1	0	-0.970143	0	0	0.707107	-1	0.707107	0.707107	0.894427	0.894427	0.83205	0	0	-0.666065	-0.894427	0.707107		-0.0913981	-0.994841	-0.684675	-0.942358
498	-0.705239	-0.970143	-1	0.928477	0	0.447214	-0.707107	-1	1	-0.707107	-0.707107	0.447214	0.780869	1	0.894427	0.994651				-0.0578299	-0.996462	0.911371	0.348187
500	-0.707107	-0.970143	-1	0.928477	0	0.447214	-0.707107	-1	1	-0.707107	-0.707107	0.447214	0.707107	0.894427	0.5547	0.0386915				0.982662	-0.849241	-0.996019	0.987818
502	0	-0.707107	0.707107	0.83205	-0.707107	-0.707107	0	-1	0	-0.707107	-0.8	0.707107	0.707107	0.894427	0.5547	-0.500503	-1			-0.993499	-0.245157	-0.209529	-0.827364
504	1	0.5547	0.894427	-1	-0.894427	-0.894427	1	-1	-0.707107	0.707107	-0.6	1		-0.986394	0.196116	0.700024				-0.109125	-0.996737	-0.278573	-0.984448
506	1	0.5547	0.894427	-1	-0.894427	-0.894427	1	-1	-0.707107	0.707107	-0.6	1		-0.986394	0.196315	0.0740535				-0.117219	0.960646	-0.626687	0.903447
508	-1	-0.707107	-1	0	0.970143	0.894427	-0.707107	-0.980581	0	0	0.371391	-1	0.948683	-0.989949	0.447214	-0.878935	-1	0.894427		0.192493	-0.266879	0.998305	-0.0225507
510	-1	-0.707107	-1	0	0.970067	0.894427	-0.707107	-0.980581	0	-0.447214	0.371391	-1	0.948683	-1	0.707107	0.950752				0.333392	-0.372246	-0.972055	-0.883265
512	0	0	0	0	0.970143	1	-0.894427	-0.868805	0.707107	-0.447214	-0.447214	-0.894427	0.949182	-1	0.707107	0.953583				-0.115501	-0.921426	-0.892728	-0.222825
514	0.894427	1	0.894427	0	0	0	-1	-0.5547	1	0.707107	-0.707107	-0.707107		-0.316228	-0.707107	-0.131019	0.707107			-0.106426	-0.997241	0.389549	0.0247347
516	0.893955	1	0.894427	0	0	0	-1	-0.553688	1	0.707107	-0.707107	-0.707107		-0.316228	-0.707107	0.947066				-0.949166	-0.988045	-1	0.920281
518	-0.445328	1	0	0.894427	0	1	0.707107	0.241334	0	0	0.707107	0	0.447214	0	0	0.159372	0	0		0.46771	-0.996103	0.919741	0.68927
520	-0.447214	1	0	0.894427	0	1	0.707107	0.242836	0	-0.316228	0.707107	0	0.447214	0.707107	1	0.626941		0		-0.0197981	-0.999568	-0.894	-0.84134
522	0.316228	-0.447214	0.707107	0.707107	-1	1	0.447214	-0.316228		-0.316228	0.316228	0.316228	0.447214	0.707107	1	0.766337				-0.399462	-0.900948	-0.741536	0.150007
524	0.893955	-0.707107	0.83205	0.447214	-0.894427	-1	0	-0.893955	0	0.894427	0	1	-0.447214	-0.8	-0.316228	-0.998955				0.0943145	-0.99993	0.985611	0.454397
526	0.894427	-0.707107	0.83205	0.447214	-0.893955	-1	0	-0.894427	0	0.894427	0	1	-0.447214	-0.8	-0.316228	0.641937				0.406379	-0.911077	-0.993472	-0.516825
528	-1	0.5547	0.447214	0.707107	0.893955	0.707107	1	0	-0.83205	0.894427	-0.316228	0	0	-0.936329	0	0.777533				0.110432	0.0958529	0.997619	0.747347
530	-1	0.5547	0.447214	0.707107	0.894427	0.707107	1	0	-0.83205		-0.316228	0	0.316228	-1	1	0.869083		0		-0.631951	-0.638018	-0.640463	-0.977621
532	0.948683	0.707107	1		0.894427	0.707107	0	-0.447214	0		-0.447214	0.316228	0.316228	-1	1	0.138196	-1			0.648525	-0.746322	0.00961494	0.930064
534	0.970143	0	0.707107	-0.707107		0	-0.707107	-0.707107	0.707107	-0.948683	-0.707107	0.447214	-0.447214	0	0	0.35957				-0.395322	-0.469747	0.965743	-0.97257
536	0.970143	0	0.707107	-0.707107		0	-0.707107	-0.707107	0.707107	-0.948683	-0.707107	0.447214	-0.447214	0	0	0.264089				0.999795	-0.999604	0.881565	0.201274
538	-0.894427	0.707107	0	0	0.447214		0.894427	0	-0.707107	-0.894427	0.707107	0	1	-0.707107	0	0.932139		1		0.126076	-0.253818	0.877648	0.999541
540	-0.894427	0.707107	0	0	0.447214		0.894427	0	-0.707107	0.447214	0.707107	0	0.707107	-0.624695	0	0.119212	-0.707107			-0.332396	-0.802885	0.10274	-0.908866
542	-0.707107	-0.707107	0.707107	0	0.707107	0.948683	0.447214	-0.316228	0	0.447214	1	-0.894427	0.707107	-0.624695	0	0.875411	0			0.791285	-0.995923	0.910954	0.995626
544	1	-0.707107	0.894427	0	0	0.948683	-0.707107	-0.5547	0.447214	0	0	-0.970143		-0.894427	0	0.116189				-0.996729	-0.799207	0.461378	-0.0336887
546	1	-0.707107	0.894427	0	0	0.948683	-0.707107	-0.5547	0.447214	0	0	-0.970067		-0.894427	0	0.486912	-1	1		-0.776393	-0.999592	0.995679	0.209259
548	0	0.707107	0	1	0.894427	0.447214	1	0.707107	-0.447214	0	-1	0.705239	-0.894427	-0.759257	0	0.424764		0.707107		0.522006	-0.824251	0.522829	0.537297
550	0	0.707107	0	1	0.894427	0.447214	1	0.707107	-0.447214	0	-1	0.707107	-0.894427	-0.707107		-0.821231				0.481976	-0.900272	-0.943645	-0.836128
552	0.707107	0.707107	-0.948683	-1	0.894427	-0.316228		-0.707107	-0.780869	0	0.707107	0.83205	-0.894427	-0.707107		0.931057		1		-0.0970501	-0.666795	-0.620703	0.83205
554	0.5547		-0.948683	-1		-0.894427	-1	-0.948683	-0.554195	0.707107	0.894427	0.894427	0.948683	0.894427	1	0.961524				-0.340554	-0.932568	0.740792	0.93132
556	0.5547		-0.948683	-1		-0.894427	-1	-0.948683	-0.5547	0.707107	0.894427	0.894427	0.948683	0.894427	1	-0.341003				-0.789732	-0.995669	-0.637057	-0.833521
558	-1	0	-1	0.447214	0	1			0.780548	0.948683	-1	-1	1	-0.5547	1	0.29028	-1			-0.780869	-0.973688	-0.873364	0.179172
560	-1	0	-1	0.447214	0	1			0.780869	1	-1	-1	-0.707107	-0.768221	1	-0.513591		0.447214		0.840804	-0.793051	-0.924241	-0.42394
562	-0.707107	-1	0	0.948683	0	0.707107	-1	-1	0.624695	1	0	1	-0.707107	-0.768553	1	0.140169	-1	0		0.994197	-0.916615	-0.673604	-0.453591
564	0	-0.448157	0.707107	0.316228	0	-0.447214	-1	-1	-0.707107	-0.894427	0.894427	1	1	-0.948683	0.948683	0.307531				-0.886453	0.999466	0.622927	0.858234
566	0	-0.447214	0.707107	0.316228	0	-0.447214	-1	-1	-0.707107	-0.894427	0.894427	1	1	-0.948683	0.948683	-0.367167	-0.707107			0.682661	-0.999272	0.137439	-0.78162
568	0.707107	-0.707107	-0.447214	1	1	0	0.894427		-0.894427	-0.5547	1	-0.707107	1	-0.514496	0.707107	0.799103	-1			-0.77791	-0.996241	-0.858688	-0.382267
570	0.707107	-0.707107	-0.447214	1	1	0	0.894427		-0.894427	0	1	-0.707107		0	-1	-0.750785				0.601815	-0.970485	0.984932	0.853669
572	0		0.948683	0	0.447214	0.6	0	-0.894427	-0.5547	0	0	-1		0	-1	0.0575965	0			-0.965996	-0.727013	0.999889	-0.902329
574	-0.707107	0.707107	0.970143	-0.894427	0	0.83205	-0.707107	-0.894427	0		-0.447214	-0.707107	-1	-0.970143	-1	0.283796		1		0.701532	0.974118	0.902604	-0.3124
576	-0.707107	0.707107	0.970143	-0.894427	0	0.83205	-0.708038	-0.894427	0		-0.447214	-0.707107	-1	-0.970067	-1	0.535496				-0.418411	0.135113	0.999565	0.401617
578	0	0.447214	-1	-0.242536	1	0.447214	1	-0.447214	-0.445328	1	0.894427	-0.83205	-1	-0.989949		-0.717581				0.993884	-0.99996	-0.0579073	-0.0563477
580	0	0.447214	-1	-0.242536	1	0.447214	1	-0.447214	-0.447214	1	0.894427	-0.83205	-1	-0.83205	1	0.266311				0.801789	-0.820398	-0.934769	-0.822491
582	0	1	0.447214	-0.948683	0	-0.316228	0	-0.316228	-0.707107	1	0.707107	0	-1	-0.83205	1	0.902554				-0.975213	-0.851258	0.864666	-0.578429
584	0	0.447214	0.707107	-0.5547	-0.707107	-0.894427	-0.707107	0.5547	0	1	-1	0.948683	0.894427	-0.894427	0.447214	0.760268	-1			-0.979081	0.690587	-0.988736	0.220734
586	0	0.447214	0.707107	-0.5547	-0.707107	-0.894427	-0.707107	0.5547	0	1	-1	0.948683	0.894427	-0.894427	0.447214	-0.096723				0.894427	0.21693	0.816416	0.820113
588	-0.707107	-0.316228	0	0.447214	1	-1	-0.447214	-0.707107	-0.707107	-1	1		1	-0.707107		-0.392941	0			0.973116	-0.854522	0.791097	-0.269466
590	-0.707107	-0.316228	0	0.447214	1	-1	-0.448157	-0.707107	-0.707107	-1	1		0	-0.5547	-0.447214	-0.139255				-0.9451	-0.504047	-0.149944	-0.482297
592	0	0	0	0.371391	1	-1	0.707107	-0.707107	-0.894427	-1	1	-0.894427	0	-0.5547	-0.447214	-0.210456				0.509938	0.239847	0.295444	-0.999797
594	0.707107	1	0	-0.5547	-1	-1	0.894427	0.707107	-0.447214	1	1	-0.894427	-0.707107	-0.316228	0.447214	0.83046				0.462566	-0.609911	0.814903	0.965982
596	0.707107	1	0	-0.5547	-1	-1	0.895368	0.707107	-0.447214	1	1	-0.894427	-0.707107	-0.316228	0.447214	0.161858				0.975925	-0.988432	0.267114	0.884428
598	-0.707107		-0.707107	0.707107	0	-0.447214	0.70897	-0.707107	-0.447214	0.705239		0	0	-1	1	0.965226				-0.674217	0.968111	0.707107	0.587866
600	-0.707107		-0.707107	0.707107	0	-0.447214	0.707107	-0.707107	-0.447214	-0.445328		0	1	-0.707107	0	-0.888658				0.230624	-0.922483	-0.866578	-0.754606
602	0	0.447214	-1	0.242536	0.707107	-0.447214	0.894427	-0.447214	0	-0.447214	-0.447214	-0.316228	1	-0.707107	0	0.724756				0.924929	-0.946952	0.39055	0.760121
604	1	0.447214	-0.707107	-1	0.894427	0	1	0	0.242536	0	-0.447214	-1	1	0	0	0.610587				-0.815591	-0.563337	0.0594186	0.995061
606	1	0.447214	-0.707107	-1	0.894427	0	1	0	0.242536	0	-0.447214	-1	1	0	0	0.13198				-0.0233399	-0.967734	0.468433	-0.241772
608	0.83205	-1	-1	0.707107	-0.447214	-0.447214	0.707107	0	-0.707107	0.447214	-0.707107	-0.894427	1	0	0.894427	0.909908				0.368457	0.96	0.0718233	0.0336067
610	0.83205	-1	-1	0.707107	-0.447214	-0.447214	0.70897	0	-0.707107	0.705239	-0.707107	-0.894427	1	0	1	-0.801524				0.988693	0.292504	0.552213	0.616662
612	0.8	1	0.707107	1	-0.316228	0	1	0.447214	-0.447214	0.707107	-0.242536	0	1	0	1	0.994056				-0.553569	-0.924261	-0.878389	-0.894427
614	0.70897	1	0.894427	-0.316228	0.707107	0.316228	0.895368	0.707107	0	0	0.447214	1	1	-0.948683	-0.707107	0.411496				0.416124	0.965108	-0.0391367	0.908404
616	0.707107	1	0.894427	-0.316228	0.707107	0.316228	0.894427	0.707107	0	0	0.447214	1	1	-0.948683	-0.707107	0.359732				0.249193	-0.903229	-0.558499	0.745598
618	0	-0.948683	-0.83205	-0.707107	-0.316228	0	-0.707107	-0.707107	-0.447214	0.707107		-0.970143	-0.707107	-0.961524	-0.316228	0.999708				-0.996517	-0.958072	0.056146	-0.486235
620	0	-0.948683	-0.83205	-0.707107	-0.316228	0	-0.707107	-0.707107	-0.447214	0.447214		-0.970143	-0.894427	-0.970143	0	-0.965732				-0.645445	-0.982916	0.0918502	0.432909
622		-1	-0.894427	0.316228	-0.242536	-1	0	0	0.707107	0.447214	-0.707107	-0.948683	-0.894427	-0.970143	0	0.995726				0.92502	-0.288862	0.209776	0.801883
624	0	-0.894427	0.707107	0.707107	0	-0.707107	1	1	0.894427	-0.447214	-0.707107	0.447214	0.707107	0.447214	-0.445328	0.895363				-0.983208	-0.95534	-0.165181	0.339644
626	0	-0.894427	0.707107	0.707107	0	-0.707107	1	1	0.894427	-0.447214	-0.707107	0.447214	0.707107	0.447214	-0.447214	0.497112				0.812806	-0.732039	-0.98674	-0.198949
628	0.447214	1	0	-0.707107	0	0	0.707107	-0.894427	-0.894427	-0.948683	-0.707107	-1	0.894427	0	0.831149	0.132164				-0.977659	0.814487	0.356651	-0.884385
630	0.447214	1	0	-0.707107	0	0	0.707107	-0.894427	-0.894427	-0.893955	-0.707107	-1	1	-0.707107	1	0.363996				0.342345	-0.163054	-0.537109	-0.732395
632	-0.894427	0.948683	-0.707107	-0.5547	0.707107	-0.707107	0.707107	0	-0.970143	-0.894427	-0.948683	-0.894427	1	-0.707107	1	-0.249634				0.877651	0.995948	0.530331	-0.553197
634	-0.707107	0.707107	-0.5547	-0.447214	0.447214	-1		1	0	1	-0.707107	-0.707107	-0.948683	0	-0.894427	0.574809				0.00161812	-0.367228	-0.0479448	0.832332
636	-0.707727	0.707107	-0.5547	-0.447214	0.447214	-1		1	0	1	-0.707107	-0.707107	-0.948516	0	-0.894427	-0.0525588				-0.826848	0.835705	0.993506	-0.356588
638		-0.707107	0.6	0.707107		0.980581	0.894427	1	0.707107	0.707107	0.707107	0	0	-0.83205	-1	0.575271				0.995876	-0.712403	-0.195013	-0.47117
640		-0.707107	0.6	0.707107		0.980581	0.895368	1	0.707107	0.316228	0.707107	0	1	-0.706486	-0.707107	-0.934899	-0.707107			0.341935	0.695225	0.960211	0.997071
642	0	-0.707107	0	-0.316228	0.447214	-1	0.707107	0.92915	0	0.316228	0.707107	0.894427	1	-0.707107	-0.707107	0.492664				0.0325208	0.487412	-0.700505	-0.662016
644	0		-0.83205	-0.948683	0.447214	-0.989949	0	0.83205	-0.83205	-0.242536	-0.707107	1	0	-0.242536	0	-0.754872				-0.908883	0.481641	0.505551	0.0883972
646	0		-0.83205	-0.948683	0.447214	-0.989949	0	0.83205	-0.83205	-0.242536	-0.707107	1	0	-0.242536	0	0.957933				-0.413579	0.586927	-0.196116	-0.980581
648	0	0.707107	1	0.894427	0	-0.5547		0	0	0.6	0	-0.707107	-0.948683	-0.70897		0.816577				0.470296	0.567425	0.966911	0.952838
650	0	0.707107	1	0.894427	0	-0.5547		0	0	1	0	-0.707107	-0.948683	-0.448157	0	0.124035		0		-0.79201	-0.203143	0.53171	-0.586249
652	0	-0.447214	0.894427	0	0	-0.316228	0.707107	-1	0.707107	1	-0.707107	-0.970143	-0.948516	-0.447214	0	0.263303	-0.894427			0.926356	0.967813	0.168238	0.999751
654	0	-0.894427	0.707107	-0.707107		1	0.707107	-0.707107	0.707107	-0.707107	-1	-0.242536	0	0	-0.314729	-0.476283				-0.591246	-0.433816	-0.0531544	-0.850027
656	0	-0.894427	0.707107	-0.707107		1	0.705239	-0.707107	0.707107	-0.707107	-1	-0.242536	0	0	-0.316228	-0.962751				-0.5451	0.862698	-0.383684	0.0963242
658	0.707107	-0.707107	-0.447214	0	0.707107	-0.948683	-0.705239	0.948683	-0.707107	-0.447214	1	0	1	-0.707107	1	0.760565				-0.726522	-0.324813		-0.56766
660	0.707107	-0.707107	-0.447214	0	0.707107	-0.948683	-0.707107	0.948683	-0.707107	1	1	0	0.707107	-1	0.706486	0.83697				0.61764	0.970336		0.377099
662	-0.447214	1	0.707107		0	-1	0.707107	0.894427	-0.707107	1	0.707107	0	0.705239	-1	0.707107	0.204617				0.375648	0.896486		-0.977162
664	-0.894427	0.948683	0.894427	0	-0.447214	0	0.948516	-1	-0.707107	0	0	0	0	-0.447214	-0.83205	0.585491				-0.37947	0.929434		0.45457
666	-0.894427	0.948683	0.894427	0	-0.447214	0	0.948683	-1	-0.707107	0	0	0	0	-0.447214	-0.8316	-0.733268				-0.984892	0.875511	1	0.973
668	-0.447214	-0.316228	-0.8	0.316228	0.707107	0	-0.707107		1	-0.707107	0	-1	-0.707107	0	-0.707107	-0.674269			0	0.982872	0.906841		-0.640366
670	-0.447214	-0.316228	-0.799621	0.316228	0.707107	0	-0.707107		1	-1	0	-1	-1	0.707107	0.893955	0.755689			0	0.54923	0.991831	1	0.570045
672	-0.316228	1	-0.970143	0.196116	0.948683	-0.243138	0	0.83205	0	-1	-0.707107	-0.970143	-1	0.707107	0.894427	-0.392439				-0.807679	0.776834		-0.988829
674	0	0.707107	0	0	0.707107	-0.707107	1	0.83205	-0.707107	0.894427	-0.316228	-0.948683	1	-1	-0.707107	-0.398982		0		-0.72133	0.804555		-0.140566
676	0	0.707107	0	0	0.707107	-0.707107	1	0.83205	-0.707107	0.894427	-0.316228	-0.948683	1	-1	-0.707107	0.845798				0.50046	0.972428		-0.294726
678	-0.83205	-0.970143	0	-0.894427	0.447214	-1	0.707107	0.447214	0.447214	0.447214	-0.707107	-0.447214	0.707107	-0.707107		-0.992186	1	0		-0.496419	0.82157	-1	-0.990086
680	-0.83205	-0.970143	0	-0.895368	0.447214	-1	0.707107	0.447214	0.447214	-0.707107	-0.707107	-0.447214	0.447214	-0.316228	0.707107	0.999516			0.707107	0.746649	0.928638	1	0.631155
682	-0.928477	-1	0	-0.372066	-0.447214	-0.5547		-0.447214	-0.447214	-0.707107	1	-0.707107	0.447214	-0.316228	0.707107	-0.441396				-0.759422	0.930066	1	-0.667068
684	-1	0.894427	0	0	-1	-0.316728	-0.707107	-1	-1	-0.894427	0.948683	0	0.707107	0		-0.402597			1	0.578471	0.997225	1	-0.52719
686	-1	0.894427	0	0	-1	-0.316228	-0.707107	-1	-1	-0.894427	0.948683	0	0.707107	0		0.917815				-0.457957	0.999955		-0.936078
688	1	0.447214	-0.707107	0.316228	0.894427	0	0.707107	0.894427	1	-1	0	-0.707107	-0.707107	-1	1	-0.995634				0.523602	0.969142	1	0.796015
690	1	0.447214	-0.707107	0.316228	0.894427	0	0.707107	0.894427	1	0.707107	0	-0.707107	-1	-0.316228	1	0.936903				-0.395584	0.998574		-0.376465
692	0.707107	-0.707107	-0.894427	0.242836	0.894427	0.55605		0.894427	1	0.707107	-0.707107	0	-1	-0.316228	1	-0.972448			1	0.234904	0.997144	1	-0.873808
694	-0.707107	-0.894427	-0.447214	0		0.894427	-0.707107		-1	0	-1	1	1	0	-1	0.968546				-0.695324	0.999585		0.998903
696	-0.707107	-0.894427	-0.447214	0		0.894427	-0.707107		-1	0	-1	1	1	0	-1	-0.997718	0			-0.947768	0.904636		-0.999961
698	-0.893955	0.894427	1	0	-0.894427	0.707107	-0.707107	0	-0.447214	1	0.894427	0	0.948683	-0.707107	0.707107	-0.969903		1		0.761072	0.99445		-0.724718
700	-0.894427	0.894427	1	0	-0.894427	0.707107	-0.707107	0	-0.447214	0.707107	0.894427	0	0.707107	-1	0.894427	0.630199	0			0.383236	0.9562		0.401359
702	-1	0.447214	0	0.707107	0.894427	0.70897	0	0	-0.707107	0.707107	0.707107	-0.894427	0.707107	-1	0.894427	-0.707107	-1			0.387892	0.998784	-1	-0.993105
704	0	-1	-0.707107	1	1	0.707107	0.447214	0	-1	-0.447214	-0.447214	-0.894427	0.447214	0.447214	-0.707107	0.994056				-0.924439	0.963892	-1	-0.804288
706	0	-1	-0.707107	1	1	0.707107	0.447214	0	-1	-0.447214	-0.447214	-0.894427	0.447214	0.447214	-0.707107	0.820087			0	0.794358	0.892789		-0.148495
708	1	1	0.5547	0	-0.707107	-0.707727			0.707107	-1	-0.447214	0.894427	0	-0.894427	-0.948683	-0.984005				0.633745	0.993097	-1	-0.895985
710	1	1	0.5547	0	-0.707107	-0.707107			0.707107	-0.447214	-0.447214	0.894427	-0.707107	-0.948683	-0.707107	0.953583				-0.28657	0.998313	1	-0.222583
712	1		0	0	-0.447214	-0.196116	0.707107	0.707107		-0.447214	-0.196116	0.316228	-0.707107	-0.948683	-0.707107	0.316228				0.986603	0.971763	1	-0.189286
714	1	-1	-0.894427	0	0	0.707107	0.70897	0.707107	-0.707107	0.5547	0	-0.447214		0	0.707107					-0.703138	0.911463		-0.878524
716	1	-1	-0.894427	0	0	0.707107	0.707107	0.707107	-0.707107	0.5547	0	-0.447214		0	0.707107					0.998824	0.502687		0.189393
718	-0.893955	0.707107	0	-0.707107	1	0.707107	-0.707107	0.894427	1	0.894427		-0.707107	0	0.707107	0					-0.0536417	0.892275		-0.511521
720	-0.894427	0.707107	0	-0.707107	1	0.707107	-0.70897	0.893955	1	0		-0.707107	0	0.707107	-0.707107					-0.399207	0.965775		0.982327
722	-0.707107	0.970143	0	0	0.707107	0.948683		0.894427	0.894427	0	-0.707107	-0.894427	0	0.707107	-0.707107					0.911108	0.945838		-0.956726
724	1	0.83205	0	0.707107	-0.447214	1	0.70897		0.707107	0	-0.707107	0.447214	-1	-0.707107	0					-0.815629	0.854199		0.428458
726	1	0.83205	0	0.707107	-0.447214	1	0.707107		0.707107	0	-0.707107	0.447214	-1	-0.707107	0					0.736943	0.368117		0.859145
728	-0.707107		-0.894427	0.707107	0.707107	-0.316228		-0.447214	-1	-0.5547	1	-0.707107	0	-0.894427	0					0.482458	0.368684		-0.545799
730	-0.707107		-0.894427	0.707107	0.707107	-0.316228		-0.445328	-1	-0.894427	1	-0.707107	0.447214	0	0					-0.992023	0.954531		-0.762318
732	0	0.894427	1	-0.707107	0.5547	0.316228	-0.707107	1	0	-0.894427	0.948683	-0.970143	0.447214	0	0					0.0972926	-0.401216		-0.745854
734	1	0.894427	0.948683	-1	0.447214	0.707107	-0.707107	0.83205	0.948683	0	0	-1	-0.707107	-0.894427	0.316228					0.0588789	0.827874		0.203756
736	1	0.894427	0.948683	-1	0.447214	0.707107	-0.70897	0.83205	0.948683	0	0	-1	-0.707107	-0.894427	0.316728					-0.947613	0.823626		-0.712832
738	-0.707107	-1	-0.894427	-0.448157	-1	-0.894427	0.448157	0.707107	-1	0	0.447214	-0.448157	-0.894427	-0.316228	0.447214					-0.108191	-0.631165		0.934155
740	-0.707107	-1	-0.894427	-0.447214	-1	-0.894427	0.447214	0.707107	-1	0	0.447214	-0.447214	-1	0.447214	0					0.709136	0.765705		-0.754553
742	-0.447214	-1	0	-0.83205	-0.83205	-0.6	0.83205		-0.707107	0	-0.707107	-0.242536	-1	0.447214	0					-0.994847	-0.657658		0.942215
744	0		0.707107	-1	-0.447214	-0.316228	1	-0.707107	0.707107	0.707107	-0.894427	0	0.893955	-1	-0.707107					0.879495	0.522106		-0.837724
746	0		0.707107	-1	-0.447214	-0.316228	1	-0.707107	0.707107	0.707107	-0.894427	0	0.894427	-1	-0.707107					-0.914547	-0.915161		0.0350661
748	0	-1	-0.707107		0.980581	0.707107	-0.707107	0.707107	0.447214	-0.707107	-0.707107	0	0.83205	0	-0.196116					0.654531	0.970684		0.129512
750	0	-1	-0.707107		0.980581	0.707107	-0.707107	0.707107	0.447214	-1	-0.707107	0	0.707107	0.447214	0.316228					0.251333	-0.028848		0.807391
752	1	0	-0.83205	1	0.8	0	-0.894427	0.707107	0	-1	0.707107	-0.447214	0.707107	0.447214	0.316228					0.904326	0.235483		-0.445297
754	0.894427	0.707107	-0.242536	1	-0.447214	-0.894427	-0.447214	-0.707107	-0.316228	0.447214	0.707107	-0.707107	0	1	0.447214					0.668576	-0.0761942		-0.998736
756	0.893955	0.707107	-0.242536	1	-0.447214	-0.894427	-0.447214	-0.707107	-0.316228	0.447214	0.707727	-0.707107	0	1	0.447214					-0.87444	-0.214649		-0.73432
758	-1	-0.894427	0.894427	-0.707107	0.707107	0	0.707107	0.707107	0.5547	0	0.895368	-0.705239	0.316228	0.707107	0.447214				0	0.425797	-0.124571		0.344772
760	-1	-0.894427	0.894427	-0.707107	0.707107	0	0.707107	0.707107	0.5547	-0.707107	0.894427	-0.707107	1	-0.894427	0.447214				1	0.917589	-0.30774		-0.625703
762	-0.894427	0.8	0.894427	0.894427	-0.316228	0.707107	0.317229		0	-0.707107	0.948683	-0.707107	1	-0.894427	0.447214					-0.877574	-0.377087		-0.690476
764	-0.707107	0.83205	0	0.83205	-0.707107	0.707107	-1	-0.707107	-1	0.447214	1	-0.316228	-0.707107	0.707107	-0.83205					0.918316	-0.497913		0.997179
766	-0.707107	0.83205	0	0.83205	-0.707107	0.707107	-1	-0.707107	-1	0.447214	1	-0.316228	-0.707107	0.707107	-0.83205					0.154598	-0.331379		0.819736
768	1	-0.780869	-0.948683	-0.948683	1	-0.707107	0	0.447214	0.447214	0.894427	0.894427	-1	1	0.894427	-0.5547					-0.747925	-0.22736		0.739877
770	1	-0.780869	-0.948683	-0.948683	1	-0.707107	0	0.447214	0.447214	0.707107	0.894427	-1	0.894427	0.447214	0.707107					-0.621096	-0.797601		-0.965746
772	0.443436	-0.894427	-0.83205	-1	1		-0.316228	0	0	0.707107	1	-0.5547	0.894427	0.447214	0.707107					0.886098	-0.382874		0.0843973
774	-0.445328	0.707107	0	0.894427		0.707107	-0.707107	-1	-0.707107	-1	0.705239	0	-1	-0.948683	0.707107				1	-0.0707443	-0.307481		0.982788
776	-0.447214	0.707107	0	0.894427		0.707107	-0.707107	-1	-0.707107	-1	0.707107	0	-1	-0.948683	0.707107					0.856623	-0.205919		0.491321
778		-1	-1	0		-1	0	1	0	0	0.707107	1	-0.894427	0						-0.819673	-0.29745		-0.943289
780		-1	-1	0		-1	0	1	0	0.707107	0.708038	1	0	1	-0.707107				0	0.53741	0.589826		0.996893
782	0.707107	-1	0	0	0	0	-1		0.5547	0.707107	0.83205	1	0	1	-0.707107					0.950388	0.418738		-0.0674139
784	0.707107	1	0.242536	0	0	0.894427	-0.707107	-1	0.707107	-0.447214	1	1	1	0.894427	0.894427					-0.845451	0.5064		-0.627556
786	0.705239	1	0.242536	0	0	0.894427	-0.707107	-1	0.707107		1	1	1	0.894427	0.894427					0.229443	0.342928		0.489724
788	1	0	-0.707107	0	0.5547	-0.970143		-0.707107	-0.242536		1	-0.948516	0	1					1	0.193879	0.470911		-0.585185
790	1	0	-0.707107	0	0.5547	-0.970143		-0.707107	-0.242536		1	-0.949182	-0.948683	0	-0.894427					0.239019	0.422273		0.963227
792		-0.894427	0.447214	-0.141421	0	-0.948683	1	0	-0.707107		0.894427	-1	-0.948683	0	-0.894427					0.654931	0.598551		0.578017
794	-1	-0.707107	0.894427	-0.316228	-0.707107	0.447214	1	1	0		0	0.895368	0.5547	1	0.707107					-0.573373	0.449302		-0.918565
796	-1	-0.707107	0.894427	-0.316228	-0.707107	0.447214	1	1	0		0	0.894427	0.5547	1	0.707107					-0.6	0.64162		-0.982339
798	0.83205	0.83205	-0.707107	0.707107	0.707107	-1	-1	0	1		0.5547	0.447214	0	-0.447214	1					0.204037	0.561325		-0.27897
800	0.83205	0.83205	-0.707107	0.707107	0.707107	-1	-1	0	1		0.5547	0.445328	-1	-0.707107	0					0.750593	0.171941		-0.99819
802	0.948683	0.948683	0	0.242536	0.707107	0.707107	-0.948683		0		1	0	-1	-0.707107	0					-0.511673	0.2027		-0.0569025
804	0	0	1	0	0.707107	0.980581	-0.707107	0	-0.447214		0.316228	-1	-0.707107	1	0					0.248024	0.446604		0.0905357
806	0	0	1	0	0.705239	0.980581	-0.707107	0	-0.447214		0.316228	-1	-0.707107	1	0					-0.998598	0.52354		0.815355
808	0	-0.316228	-0.707107	0.707107	-0.445328	-1	1	-0.707107	0.447214		-0.707107	0.316228	-0.707107		0		-1			0.8739	0.491081		-0.0852253
810	0	-0.316228	-0.707107	0.707107	-0.447214	-1	1	-0.707107	0.447214		-0.707107	0.314729		-1	0					-0.390043	0.978469		0.948027
812	0.447214	0	-1	0	-1	-0.970143	0.894427	0.447214	0.894427		0	0		-1	0					0.734014	0.245206		-0.372039
814	1	1	-0.707107	-0.242536	-0.707107	-0.707107	0	1	0.707107		0.894427	-1		1	-0.894427		-0.707107			-0.964658	0.40117		0.875387
816	1	1	-0.707107	-0.242536	-0.707107	-0.707107	0	1	0.707107		0.894427	-1		1	-0.894427					-0.997578	0.401018		0.153298
818	0.447214	-0.447214	-1	0.447214	0.707107	0.707107	-1	-1	0.707107		1	0.707107	1	0.447214	-0.894427					0.997404	0.949959		0.999833
820	0.447214	-0.447214	-1	0.447214	0.707107	0.707107	-1	-1	0.707107		1	0.707107	1	-0.447214						0.949152	0.280837		0.31393
822	0.857493	0	0	-0.5547	0.894427	0.316228		-0.447214	0.242536		0.970143	0.5547	1	-0.447214						-0.971224	0.837896		-0.973033
824	0.948683	0.707107	0.707107	-0.948683	0	0	1	0	-0.894427		0.894427	0	0	1	-0.705239					0.678149	0.596607		-0.836805
826	0.948683	0.707107	0.707107	-0.948683	0	0	1	0	-0.894427		0.894427	0	0	1	-0.707107					-0.991986	0.696934		0.317765
828	-0.707107	0	-0.894427	0	0.707107	-0.447214	0.707107	-1	0.5547		0.948683	0.707107	1	0.707107	1					-0.0357666	-0.966048		0.993492
830	-0.707107	0	-0.894427	0	0.705239	-0.447214	0.707107	-1	0.5547		0.948683	0.707107	0.894427	0	0.980581					-0.490454	0.983792		0.757515
832	-1	0.894427	0	0.242536	0	-0.316228	0.894427	-1	0.447214		0.707107	-1	0.894427	0	0.980581					0.966193	0.817971		-0.989949
834	0	0.5547	0.707107	0.316228	-0.241633	0	0.447214	-1	-0.196116		0	-0.948683		-1	-0.707107		0			-0.426658	0.98446		0.97079

## Sheet: 3C (bottom)
	p-Values
0	0.0100151
2	0.000607027
4	2.91176e-05
6	0.033991
8	0.179751
10	0.06765
12	0.0772643
14	0.0104764
16	0.0725
18	0.0350543
20	0.0108643
22	0.0108643
24	0.109119
26	0.0406018
28	0.371636
30	0.170387
32	0.229122
34	0.331317
36	0.000254452
38	6.31468e-06
40	3.31141e-07
42	9.78481e-08
44	9.53053e-06
46	1.97502e-05
48	3.31141e-07
50	2.87477e-07
52	3.31141e-07
54	2.31487e-08
56	3.31141e-07
58	0.000109447
60	2.51118e-06
62	6.37418e-08
64	5.47408e-06
66	1.32904e-05
68	6.01858e-06
70	6.11759e-07
72	6.31468e-06
74	0.000100017
76	3.12085e-05
78	0.00195551
80	0.00274422
82	0.00569579
84	0.00286615
86	0.00119624
88	7.42727e-05
90	1.01463e-05
92	3.31141e-07
94	4.37251e-08
96	4.88042e-09
98	4.77451e-10
100	2.30436e-09
102	9.53053e-06
104	6.61457e-05
106	1.74028e-05
108	1.51534e-05
110	4.1494e-06
112	2.10373e-05
114	3.8569e-06
116	3.62726e-06
118	5.47408e-06
120	1.39948e-06
122	2.40044e-05
124	3.12085e-05
126	0.000106583
128	9.53053e-06
130	4.48702e-06
132	6.44118e-09
134	4.48702e-06
136	3.62726e-06
138	0.000334922
140	0.00316122
142	0.00150201
144	0.0109648
146	0.000244196
148	0.000607027
150	0.000225693
152	2.7244e-05
154	7.61218e-08
156	4.16652e-08
158	3.62726e-06
160	2.56659e-06
162	3.12085e-05
164	1.39948e-06
166	0.000192664
168	0.00288811
170	7.42727e-05
172	4.48702e-06
174	9.53053e-06
176	4.52873e-11
178	1.93503e-10
180	4.19577e-07
182	4.50364e-09
184	2.59497e-08
186	9.67349e-07
188	0.00102094
190	0.000574954
192	3.62121e-05
194	0.00119624
196	0.000142573
198	2.71976e-08
200	3.01258e-08
202	3.31141e-07
204	2.38069e-07
206	2.25472e-10
208	2.23713e-08
210	4.52873e-11
212	1.14242e-13
214	8.69297e-10
216	1.20459e-09
218	5.22066e-07
220	8.47759e-09
222	1.93503e-10
224	4.52873e-11
226	1.14242e-13
228	2.40052e-12
230	4.06468e-09
232	9.32726e-09
234	1.61594e-09
236	4.52873e-11
238	7.85764e-09
240	8.4197e-08
242	6.53701e-08
244	0.00655976
246	0.0207506
248	0.00177703
250	1.0567e-06
252	4.48702e-06
254	1.66711e-12
256	8.47759e-09
258	3.06477e-09
260	6.28728e-11
262	2.45562e-11
264	2.65343e-14
266	1.11022e-16
268	1.77636e-14
270	2.25985e-07
272	3.64819e-07
274	0.00139152
276	1.97502e-05
278	3.77662e-05
280	2.1932e-05
282	7.2263e-06
284	1.34712e-07
286	4.50364e-09
288	4.573e-08
290	1.20459e-09
292	4.52873e-11
294	5.07821e-09
296	3.19116e-10
298	3.19116e-10
300	1.20459e-09
302	2.31487e-08
304	3.62726e-06
306	3.31141e-07
308	3.31141e-07
310	3.31141e-07
312	2.17556e-06
314	1.20459e-09
316	4.19577e-07
318	3.94734e-06
320	1.02875e-05
322	9.67349e-07
324	8.20018e-08
326	3.8569e-06
328	0.000267354
330	3.52509e-05
332	8.87174e-06
334	3.62726e-06
336	1.05232e-07
338	1.86944e-07
340	1.2981e-06
342	3.12085e-05
344	0.000244196
346	0.000607027
348	0.00139152
350	0.00197767
352	0.000493822
354	0.00119624
356	0.00274422
358	0.253292
360	0.406476
362	0.142749
364	0.0150621
366	0.221964
368	0.0705393
370	0.00650213
372	0.00650213
374	0.000879434
376	4.48702e-06
378	3.29968e-05
380	3.62726e-06
382	0.000419528
384	0.000214601
386	8.51561e-05
388	0.00569579
390	0.0113536
392	0.12731
394	0.070039
396	0.0656542
398	0.0656542
400	0.174553
402	0.0656542
404	0.0225687
406	0.00769731
408	0.769511
410	0.415981
412	0.189653
414	0.175584
416	0.810632
418	0.424265
420	0.0680517
422	0.040374
424	0.0259848
426	0.0259848
428	0.0207506
430	0.00139152
432	0.000334922
434	0.00241491
436	0.0434788
438	0.0376262
440	0.0156988
442	0.00316122
444	0.000607027
446	0.000416024
448	0.000179522
450	0.000465364
452	0.0100151
454	0.00286615
456	0.0139083
458	0.00113315
460	0.00346147
462	0.00264085
464	0.147193
466	0.00625351
468	0.00286615
470	0.0364472
472	0.041893
474	3.62121e-05
476	2.11853e-05
478	0.0016882
480	0.0059658
482	0.0207506
484	0.0725
486	0.000580227
488	0.00569579
490	0.000228729
492	0.000101984
494	0.105663
496	0.115789
498	0.0540467
500	0.0516925
502	0.0109648
504	0.116348
506	0.216677
508	0.115789
510	0.040374
512	0.00850883
514	0.00139152
516	0.000214601
518	0.0100151
520	0.0216377
522	0.0324907
524	0.0216377
526	0.00547414
528	0.0272057
530	0.00216769
532	0.000465364
534	0.0104764
536	0.0150621
538	0.0156988
540	0.00250424
542	0.0207506
544	0.0364472
546	0.0191153
548	0.0250804
550	0.0191153
552	0.0721756
554	0.0449021
556	0.00917458
558	0.0449021
560	0.0535934
562	0.13072
564	0.041893
566	0.00650213
568	0.0498613
570	0.0656542
572	0.00569579
574	0.00775496
576	0.06765
578	0.308456
580	0.0124167
582	0.0272057
584	0.216677
586	0.260259
588	0.253292
590	0.0406018
592	0.00438554
594	0.000574954
596	0.0109648
598	0.0232985
600	0.0556078
602	0.00043963
604	0.0117931
606	0.00177703
608	7.42727e-05
610	0.00564528
612	0.00320944
614	0.17889
616	0.0406018
618	0.00812066
620	0.364007
622	0.188899
624	0.10617
626	0.0280858
628	0.0214832
630	0.0272057
632	0.041893
634	0.0422026
636	0.0304336
638	0.0746643
640	0.0746643
642	0.00775496
644	0.165276
646	0.26607
648	0.300843
650	0.147193
652	0.10617
654	0.0104764
656	0.00119624
658	0.000355767
660	0.0520714
662	0.143558
664	0.408034
666	0.123372
668	0.279476
670	0.253292
672	0.0795717
674	0.0612015
676	0.10278
678	0.00397596
680	0.0501509
682	0.0481187
684	0.00438554
686	0.00119624
688	0.0207506
690	0.0364472
692	0.0270078
694	0.0572883
696	0.0725
698	0.0232985
700	0.259219
702	0.147193
704	0.070039
706	0.0232985
708	0.0214832
710	0.00417385
712	0.000493822
714	0.000373136
716	0.000100017
718	0.000493822
720	3.77662e-05
722	0.00160542
724	0.00177703
726	0.0059658
728	0.00170702
730	0.00177703
732	0.0272057
734	0.122925
736	0.105663
738	0.00417385
740	0.142749
742	0.0851045
744	0.00250424
746	0.00250424
748	7.94241e-05
750	0.000607027
752	0.000403224
754	0.00547414
756	0.0046138
758	0.00438554
760	0.00625351
762	0.00502383
764	0.0023782
766	0.00177703
768	0.0139083
770	0.0127997
772	0.00300853
774	0.00957897
776	0.0422026
778	0.00177703
780	3.29968e-05
782	3.35724e-05
784	0.00547414
786	0.000298874
788	0.00118928
790	0.00397596
792	3.12085e-05
794	4.90038e-05
796	2.70375e-06
798	4.90038e-05
800	0.000616157
802	0.0272057
804	0.041893
806	0.0059658
808	0.00119624
810	0.000192664
812	0.000419528
814	0.000214601
816	3.62726e-06
818	4.76473e-06
820	8.87174e-06
822	1.39948e-06
824	1.32904e-05
826	0.000239309
828	7.2263e-06
830	3.77662e-05
832	0.000100017
834	0

## Sheet: 3G
	X_Cell 0	Y_Cell 0		X_Cell 1	Y_Cell 1		X_Cell 2	Y_Cell 2		X_Cell 3	Y_Cell 3		X_Cell 4	Y_Cell 4		X_Cell 5	Y_Cell 5		X_Cell 6	Y_Cell 6		X_Cell 7	Y_Cell 7		X_Cell 8	Y_Cell 8		X_Cell 9	Y_Cell 9		X_Cell 10	Y_Cell 10		X_Cell 11	Y_Cell 11
0	0	0		0	0		0	0		0	0		0	0		0	0		0	0		0	0		0	0		0	0		0	0		0	0
1	-0.79794	0.635128		-0.617396	0.930124		1.08326	2.12784		0.114452	0.027404		1.23802	2.22295		-0.881764	-0.720564		2.09076	0.815672		0.070928	1.42984		-1.36973	-0.474807		-1.64567	-1.40205		0.626447	-0.601588		-1.24295	-0.725883
2	-1.44758	0.896272		-1.26864	0.812448		0.341744	1.71517		0.344968	0.683488		0.559364	3.2111		1.41695	-1.51206		3.34651	2.27453		0.599664	1.96019		-0.0472321	-0.825319		0.161584	-1.97132		2.24477	-0.288364		-2.27957	0.723397
3	-2.26486	0.954304		-0.994604	0.670592		-0.599664	4.4201		2.49699	6.0982		0.385268	3.64957		0.938184	-0.586768		4.92144	2.85485		1.04135	3.06925		-0.865093	1.11866		-0.7582	-0.477293		3.0676	0.720911		-1.24295	0.621475
4	-2.42445	0.923676		-1.8409	1.47176		3.29493	6.21265		1.0349	4.37819		2.94996	4.19281		2.83712	-1.01072		5.40987	3.63022		3.01122	4.77474		-1.5686	1.07142		-1.01922	-1.1634		1.31007	-0.0049718		0.412659	0.621475
5	-3.15146	2.83712		-2.58726	0.922064		0.86242	5.53561		2.0682	5.92894		1.97309	6.30131		1.71356	-1.34602		6.04822	4.4733		2.60177	2.5792		-1.73764	1.54623		-1.69787	-0.889952		2.70466	-0.437518		0.517067	0.517067
6	-2.56792	3.28364		-3.50126	2.44379		1.76998	3.41099		1.8667	4.64417		5.45984	5.24545		2.09882	-0.97526		6.66401	4.43945		3.66891	4.02194		-0.959557	2.08816		0.944642	-0.976959		0.932213	1.57606		-2.59031	1.65561
7	-2.81133	3.95101		-3.80593	1.89249		3.64796	7.47484		1.86186	7.64088		5.21643	7.66022		2.16653	-0.2015		5.53722	5.63072		1.21706	0.053196		-2.22737	3.20184		-1.1112	-1.14103		2.75686	1.22306		-1.14103	0.827805
8	-4.25729	2.4583		-3.0902	1.93601		2.82584	5.96924		1.04135	2.66464		4.97624	7.54255		2.15847	0.50778		6.56245	5.37441		0.889824	5.26479		-2.24725	2.90602		-1.29267	-1.29764		2.16025	0.718425		-0.519553	1.34487
9	-4.43139	0.520676		-3.22884	2.44863		4.10738	6.34967		0.920452	6.14333		5.06007	7.78112		2.7678	0.106392		6.38513	5.65167		0.232128	-3.13212		-0.0273449	3.18195		0.397744	-1.42193		-0.246104	0.569271		-1.14103	0.412659
10	-4.51521	1.25575		-3.25302	2.78876		3.85429	7.56673		1.88604	6.78652		4.0703	8.30019		2.65335	0.744744		7.74405	5.97085		0.293384	-1.34763		-1.77493	4.52434		-0.986902	-1.7277		1.84454	1.20069		0.412659	1.44928
11	-3.95746	0.917228		-3.44001	3.31427		5.32605	9.564		2.10205	7.98585		4.99559	8.40013		3.03217	0.4433		8.88373	6.54794		-0.99944	-2.88548		0.852664	4.28569		0.499666	-1.87188		0.0323167	0.270963		-0.104408	-0.519553
12	-5.27285	2.6598		-3.93973	3.23367		6.17718	13.4892		1.80544	4.76668		9.86705	6.64144		3.4126	0.327236		9.14488	7.52804		1.67487	5.35345		-1.58103	3.4032		-0.738312	-2.23482		2.69472	-0.954586		-0.310737	-0.725883
13	-5.11004	3.49159		-5.15518	3.95907		6.48669	7.93265		2.59048	8.84666		4.01549	10.9971		3.80432	0.349804		7.92298	7.80692		-0.127348	-2.25519		-1.44679	4.55914		-0.293336	-1.89674		3.36839	-0.074577		-0.830291	-0.208816
14	-6.48669	0.891436		-6.09497	4.7554		5.85801	9.22548		4.11221	10.6473		6.17718	10.715		3.60927	0.222456		8.19702	7.93265		1.64263	-1.63457		-0.929727	4.12162		-0.469835	-2.44115		3.6145	-0.991874		-2.59031	-0.725883
15	-6.09014	1.06714		-5.3067	3.55446		4.70543	8.89502		4.9569	8.94821		4.65062	12.8992		3.22722	-0.111228		8.36144	8.38401		4.47652	8.47428		-1.81719	3.82083		-0.293336	-2.56793		4.05699	-2.17516		-2.79664	-2.4859
16	-4.94078	1.9618		-6.35128	3.87202		5.88864	12.1996		3.8559	8.44204		2.33579	15.077		3.63184	-0.261144		7.78274	8.5162		5.06329	10.3942		-0.482265	3.82829		1.68295	-2.28454		3.14466	-2.82398		-2.59031	-2.4859
17	-5.19386	0.94302		-4.74089	3.98486		6.55117	9.29479		3.34812	8.87567		4.325	10.7456		4.18475	0.457808		7.98262	7.70214		3.71566	7.35556		-2.03347	4.12411		1.86691	-1.97132		2.14285	-2.18759		-1.24295	-1.34736
18	-5.05523	1.59588		-4.01549	2.80649		6.83649	15.206		3.36747	7.29108		6.02727	15.0609		3.67214	1.03329		7.32009	8.57745		1.9618	10.9213		-1.85945	3.88298		1.83211	-2.37403		4.27326	-2.39889		-2.4859	-2.90105
19	-5.15679	2.94674		-4.35079	3.44001		8.57745	16.8793		2.39221	8.48718		6.07724	13.0749		4.96496	1.10906		7.57962	9.16744		0.83824	11.3469		-2.42375	4.36027		2.01855	-2.14533		4.13654	-3.42806		-2.07324	-3.72885
20	-5.63394	4.81182		-5.6146	3.79142		8.05678	12.8412		3.01122	11.6435		6.53988	14.2001		4.65707	0.930124		7.8859	9.97344		3.49965	12.3737		-2.70715	4.90717		1.16092	-2.65246		4.33292	-3.43303		-2.27957	-5.59328
21	-5.1181	4.44912		-5.74356	3.65763		6.31904	10.9697		3.41099	10.6618		3.33523	14.7998		4.78603	1.13968		7.65861	9.4576		2.97898	10.4828		-4.49948	6.14514		-0.964529	-2.94579		3.17201	-4.15642		-3.62693	-6.42357
22	-4.7022	4.39109		-5.49531	3.90749		7.74405	13.8938		3.91716	10.9922		6.01115	13.8616		5.44372	1.81511		7.76017	10.6021		3.75757	13.0814		-2.61268	7.82313		0.673679	-1.93652		5.29	-3.55235		-3.41811	-6.52549
23	-4.97463	4.6748		-4.86502	4.75218		7.51031	15.9991		3.88653	12.2689		2.66464	14.4854		5.1713	2.92417		7.50064	10.9503		4.29276	12.8025		-5.52616	7.52731		-0.865093	-2.03595		3.63936	-4.85993		-3.10737	-7.56211
24	-5.64361	5.38569		-5.85801	4.05418		8.48718	14.3694		3.31911	13.9293		1.81189	16.573		5.52432	2.96608		8.30664	11.0406		3.61733	13.9648		-5.96367	7.42787		-0.549384	-3.05766		2.68477	-5.24525		-3.00545	-9.53094
25	-5.40504	4.81021		-6.88485	4.65223		10.0847	17.9158		4.97463	14.9174		5.45178	13.1797		5.46629	2.91772		7.71342	11.5016		2.50021	14.3291		-5.79215	7.57454		-0.504638	-3.47529		5.66537	-5.70514		-3.72885	-10.2543
26	-6.37868	6.3948		-5.77418	4.0171		8.82409	14.7047		4.52972	14.8659		7.38457	12.4285		6.60114	2.821		8.30825	11.8885		2.32128	15.6864		-5.16073	9.21523		-0.633904	-2.14782		4.69835	-5.52118		-3.10737	-10.5651
27	-5.61298	5.4131		-6.37546	4.22989		10.9374	14.1163		6.03049	17.5934		7.34427	12.5156		5.9644	2.21811		7.61992	12.9444		3.2369	14.421		-2.19754	9.74473		1.44431	-3.10737		4.49699	-6.27193		-0.725883	-9.63286
28	-6.56729	4.86985		-8.6242	3.98164		10.565	14.4806		5.97568	18.0318		5.71293	13.1088		6.9719	3.5061		8.17123	13.5037		3.56897	14.1163		-1.30013	10.8311		1.16837	-3.17698		6.10786	-7.00775		-3.10737	-10.4632
29	-5.88864	7.60864		-8.43882	4.34595		11.5306	13.4538		5.84995	17.6885		8.81119	12.1464		6.2336	2.33095		7.76823	13.8132		3.1966	15.2366		-3.60455	10.9603		-1.26781	-3.70399		3.36094	-7.90765		-3.03777	-12.3674
30	-5.88541	6.9993		-8.17123	4.04128		10.6521	13.9599		9.30608	20.74		7.61509	13.9551		6.35289	2.22456		8.32114	14.0389		2.63723	14.5499		-3.48772	12.3226		-0.0522039	-1.77742		4.55665	-6.88346		-1.76747	-12.1834
31	-5.92894	7.24755		-8.66611	3.83011		11.7531	14.508		8.3018	19.8244		9.19968	12.8928		5.07135	1.9215		9.06589	14.3823		1.90861	13.9502		-3.791	12.2853		-0.154126	-2.28951		6.59509	-7.6864		-0.114351	-13.7271
32	-6.19492	7.56189		-9.66072	3.19337		12.4511	17.3661		8.99174	20.5417		10.802	11.8692		6.20942	2.45508		9.10941	15.3865		1.90055	13.2635		-2.37155	13.4487		0.114351	-2.81901		4.66106	-8.54901		-0.49718	-14.4282
33	-6.74622	7.49096		-9.98795	4.34918		12.0658	15.588		10.4264	21.8313		6.93482	12.2625		5.69681	1.94246		9.11264	15.6831		1.50077	13.0669		-0.668707	14.1149		2.12793	-3.61698		5.52118	-9.66269		-2.91845	-15.5916
34	-6.63177	8.50169		-9.52531	3.60282		12.032	16.1861		11.1405	22.4197		7.9391	10.5941		5.68069	0.81406		9.03687	15.7799		0.704444	12.7703		-3.60455	14.3934		0.218759	-3.91778		6.05565	-9.7149		-0.340568	-16.2951
35	-6.37062	8.23571		-10.1395	3.93328		10.5425	17.1001		12.6993	23.5868		6.97674	12.3947		5.89025	0.675428		9.24804	14.5676		0.235352	12.7009		-3.33359	15.42		0.967015	-2.34669		6.42108	-9.66021		-0.34554	-15.8352
36	-6.62048	8.45978		-9.47211	3.96713		12.0223	17.4273		14.5483	24.9086		6.20298	12.6655		6.08369	-0.196664		8.54521	15.1028		0.011284	12.6139		-1.99369	16.0316		0.88498	-2.93336		6.27193	-9.72235		-0.976959	-15.9644
37	-7.32815	8.95627		-11.1857	4.59904		12.1706	20.3483		15.4559	27.5878		6.16268	14.5499		4.99559	-1.06876		8.49846	15.2334		-0.159588	11.9207		-1.54623	16.4194		0.743284	-3.30873		5.52616	-10.5999		-0.571757	-16.2951
38	-6.64466	9.269		-10.6408	3.67375		14.8449	21.5347		15.156	28.4099		6.08208	13.0798		4.93111	-1.70066		8.80636	14.2372		-0.248248	12.1916		-0.561813	16.3895		3.08749	-3.75868		4.12659	-11.1169		1.15843	-17.3193
39	-6.87518	10.1492		-11.1309	3.54156		16.3038	23.9656		16.1119	28.1697		6.57051	12.8879		4.35079	-2.07464		8.79507	14.0405		-0.678652	11.608		-1.92906	16.2976		2.8389	-3.72139		3.63687	-11.721		-0.673679	-17.1254
40	-7.14761	10.4506		-10.7359	3.35618		17.9367	25.3551		17.3338	29.3497		7.67957	12.9444		3.45129	-2.0553		8.4501	14.4		-1.34763	10.7198		-3.39325	18.0203		1.97132	-3.13223		4.90468	-11.0349		1.40951	-17.4137
41	-7.19597	8.89502		-11.6741	3.19982		16.9147	28.2019		20.6755	32.1804		4.41043	15.8895		3.49643	-2.93706		8.76767	14.3742		-1.72162	10.7778		-3.19438	17.451		4.31055	-3.878		5.01157	-12.0094		-0.482265	-18.6791
42	-7.0122	9.70263		-12.0449	2.05208		16.5133	27.3556		22.842	31.3421		6.47057	13.0266		3.34168	-3.24334		8.45333	14.3613		-1.1155	10.615		-5.5535	17.5157		2.292	-4.36275		6.13769	-12.2257		1.81719	-19.9717
43	-7.20242	11.5645		-10.8455	2.10688		15.9669	28.7258		24.0075	32.0063		5.06652	14.6853		3.4255	-3.32072		7.94716	13.5344		-1.52012	10.0105		-3.79597	17.5505		4.47711	-4.62377		6.23215	-12.422		1.58352	-21.0953
44	-7.4152	11.0535		-9.34315	2.35352		18.0802	31.6097		26.008	33.3474		8.06	13.0911		2.84679	-2.93062		9.07556	14.0566		-1.68615	10.2636		-3.45043	19.3453		4.10919	-3.46534		8.93432	-11.6812		0.176499	-20.4938
45	-6.56084	12.1932		-8.6516	0.91884		19.6503	31.7612		27.4959	33.5022		6.86712	13.8455		2.98059	-3.61894		8.98368	13.6843		-1.87637	9.88156		-3.6145	19.3154		3.70896	-3.90535		6.97792	-11.9373		0.340568	-20.9686
46	-7.0654	10.6021		-8.58712	1.85058		22.5229	32.5253		29.2014	32.78		4.87791	13.3893		2.60177	-3.48998		9.04332	14.2259		-2.49054	9.2416		-5.10355	19.0768		4.27823	-4.33292		10.7565	-11.2636		-0.355484	-22.2662
47	-7.13632	12.7009		-8.62904	1.30411		22.7631	34.2292		29.311	33.9487		5.21321	13.8648		2.38576	-3.73823		8.80313	15.0029		-0.843076	9.19807		-4.32795	19.3751		4.27078	-4.04953		9.49117	-11.9447		-1.31504	-23.4719
48	-6.82843	13.0927		-9.35766	2.7001		25.3374	36.644		30.6377	33.7408		5.47596	13.5698		2.67753	-3.94779		8.974	15.0529		-2.46958	9.01753		-3.28636	19.7604		4.86242	-4.24592		10.8261	-11.8975		-0.949614	-24.4861
49	-6.78652	13.2329		-9.39957	1.78126		25.2342	37.9094		31.4018	34.3275		4.16218	13.9148		2.29871	-4.61999		9.25933	14.4064		-1.62328	8.50008		-6.14763	19.4646		5.59576	-3.54489		12.0094	-11.3456		-1.92657	-24.8068
50	-6.79136	12.7654		-8.3147	1.8135		26.2837	39.3264		31.8112	35.8509		4.07997	13.8487		1.11067	-4.93594		9.04977	14.3484		-2.34707	7.81498		-1.81471	20.0438		7.57951	-3.72388		14.4232	-11.5793		-2.32432	-25.8509
51	-6.74622	12.7735		-9.71714	1.68132		26.1998	40.4531		33.6811	36.7359		3.5464	15.7476		0.541632	-5.01816		9.46566	14.2307		-2.15041	8.25022		-0.53944	20.3123		7.80821	-3.91281		14.6693	-12.0964		-1.37222	-26.5618
52	-6.44155	12.6107		-9.99924	1.37181		27.0623	41.7685		33.9939	37.3259		4.88436	15.2205		0.767312	-4.85534		9.18034	14.8256		-2.39704	7.43616		-1.84702	20.546		6.89837	-4.38513		15.1391	-12.5265		-3.68908	-28.481
53	-7.26206	12.9363		-10.4877	1.7458		27.1719	43.1629		36.8535	37.5048		4.97463	15.1383		0.433628	-5.25673		8.44527	15.1802		-4.37497	7.70052		2.35415	22.2712		9.45636	-3.8084		15.9446	-11.547		-4.15145	-28.65
54	-6.92515	13.0105		-11.5258	1.18482		27.3992	43.611		38.7364	38.6606		2.71138	16.8067		0.41912	-4.46363		8.38079	15.6509		-4.04934	7.28624		1.07391	22.127		10.3165	-4.12162		15.2311	-10.933		-6.50063	-30.3081
55	-6.32549	12.0497		-9.70263	2.59693		27.8151	45.2827		39.2441	37.537		3.69793	16.6068		1.51689	-4.48136		7.8456	15.3301		-3.92038	8.21959		-2.7146	22.1742		9.10337	-4.08931		15.8153	-10.7838		-10.4383	-31.8394
56	-6.9445	13.3683		-8.33726	0.567424		28.0472	46.0419		41.3236	40.8819		3.44968	16.4827		1.0881	-4.06224		7.73115	15.1818		-3.55607	8.67417		-2.11053	22.03		11.0225	-5.01157		18.249	-10.3538		-10.2991	-33.2763
57	-7.7505	12.2609		-7.98262	0.565812		28.4631	46.9527		40.6305	39.0265		1.93118	16.66		1.89732	-4.0832		7.51353	15.5687		-4.64095	8.90146		2.19256	25.3065		12.6159	-3.97495		20.0562	-8.89455		-11.0573	-32.8586
58	-7.5893	12.7606		-9.38345	0.385268		29.5673	48.1021		43.279	42.6197		1.3702	17.3387		0.884988	-4.3395		7.74405	15.7525		-4.37819	9.81224		-2.28206	24.8292		11.6688	-4.85993		21.2544	-8.33025		-13.2175	-34.1289
59	-6.99447	12.9637		-9.6849	-0.157976		28.7436	49.0387		42.5375	41.0883		1.5314	17.5966		1.28476	-4.21538		8.05355	15.3688		-4.32338	10.0669		-2.38398	25.1374		12.6333	-5.63305		21.692	-7.64663		-15.778	-35.3396
60	-6.20459	12.8541		-9.06911	-1.69421		30.8746	49.1257		45.0215	41.0963		1.50561	16.7213		0.9269	-4.27825		8.17929	15.4704		-3.67858	10.4538		-0.999332	25.0778		15.3156	-6.4708		21.4931	-7.05498		-14.4605	-37.1244
61	-6.30937	12.6526		-8.06161	-0.170872		29.8704	51.0021		44.4622	41.7089		0.569036	19.5004		1.72323	-4.25729		9.0675	15.6703		-3.7479	10.6553		-1.42691	25.1648		15.9545	-6.37136		24.6328	-5.79463		-14.9775	-38.1337
62	-6.67852	13.0233		-8.12609	-1.79899		31.3663	51.1713		46.0516	42.1328		-1.1816	19.7422		1.33474	-4.36207		8.42109	15.3559		-3.76563	11.4694		-3.17698	26.8925		15.0571	-6.05814		24.3966	-3.4728		-16.6282	-38.0914
63	-6.26262	12.4817		-8.19057	-0.074152		31.621	51.4647		48.2294	43.4192		-1.41856	20.2145		1.9215	-3.83495		8.355	15.5284		-3.77208	11.6016		-2.91099	27.5686		15.6587	-7.02515		26.2635	-2.93833		-17.103	-38.8024
64	-6.0853	13.7262		-8.43237	-0.91078		31.0729	52.577		49.5029	45.7647		-1.2219	20.3596		1.24608	-4.35562		8.65644	15.0126		-3.90588	12.0126		-0.350512	28.4114		18.2913	-7.25386		27.6283	-2.03347		-17.625	-39.6799
65	-5.52594	13.3667		-10.6263	-1.60233		31.6903	53.7392		53.0042	45.6663		-1.75708	21.0656		1.02523	-3.7608		8.87245	15.2995		-4.30888	12.7558		-2.28951	29.0726		17.5032	-6.01588		29.1894	-2.15776		-15.6139	-40.7215
66	-5.2922	14.1534		-10.6473	-1.32345		31.4646	54.8822		52.3981	46.3692		-1.75708	22.2859		0.2015	-3.35135		8.7322	15.8443		-3.31105	12.2931		-2.14782	29.2615		18.0501	-6.71193		31.7101	-1.23798		-17.5629	-40.6942
67	-5.91765	14.6063		-9.35927	-0.006448		32.2819	54.6355		54.7355	45.3552		-3.22239	22.2375		0.2821	-3.53995		9.18356	15.9765		-3.51255	12.6735		0.544412	30.86		20.7175	-6.64232		33.1992	0.581701		-15.7432	-41.87
68	-4.41849	13.2539		-9.50435	-0.441688		31.1841	55.888		54.866	44.1333		-2.38415	23.6867		0.764088	-3.68181		9.27867	16.3376		-2.59854	13.1442		-3.12478	31.111		20.1383	-5.83938		32.3689	0.845206		-15.4623	-42.3771
69	-5.11326	13.9793		-10.262	0.496496		30.4475	55.967		56.3974	46.7448		-2.52439	23.3434		1.81028	-3.55285		9.45277	16.8406		-3.70599	13.5521		-3.03777	31.3522		20.2352	-6.35893		33.0625	1.38465		-16.5884	-43.461
70	-5.13261	14.4548		-10.2975	1.20739		30.1573	56.1298		57.3485	46.1564		-4.29759	23.5159		1.80544	-2.47603		10.0782	16.9534		-2.76136	13.3764		-1.86442	31.6082		22.6714	-6.41611		35.8318	2.31686		-16.7997	-45.0669
71	-5.45662	14.7401		-10.7069	-1.21061		30.8311	55.4657		58.2206	46.2031		-4.03645	23.8092		1.9618	-2.98704		10.586	17.7723		-3.58509	14.6499		-1.22803	32.8387		23.3028	-5.41926		34.9319	4.01224		-14.3784	-44.2714
72	-4.99075	14.1534		-11.0486	-0.191828		30.6667	54.9144		58.2061	48.2246		-3.67697	22.8259		1.68615	-3.80271		10.8923	18.2817		-2.85969	15.4333		-5.9065	33.6964		22.1071	-5.26762		36.4284	4.54174		-17.4634	-45.1514
73	-4.3121	13.5311		-9.2287	1.94246		31.7532	55.182		60.4468	47.5476		-2.71783	22.7985		1.69905	-3.93489		10.4748	18.9507		-2.02951	15.7557		-3.94512	33.7486		24.8689	-5.17316		37.7111	5.3944		-15.7109	-45.2484
74	-3.60282	14.4693		-12.8122	3.91877		32.0337	56.3716		61.4639	47.2429		-2.84679	21.899		0.909168	-3.88814		9.58334	20.4111		-2.15363	16.544		-6.85363	33.4925		22.9275	-6.14763		39.9509	5.88164		-14.6917	-46.2924
75	-4.04773	14.7063		-9.14165	2.29065		32.0707	56.9826		59.8648	48.8533		-3.8011	22.8259		1.46531	-3.75757		8.6774	21.5186		-3.87202	16.5794		-5.44661	35.0388		26.6066	-4.28569		41.7557	7.7038		-12.2381	-45.8872
76	-4.20893	14.6225		-11.6967	1.45564		32.809	56.7585		61.1754	48.8339		-3.88492	21.8716		1.61522	-3.6802		8.49524	23.1999		-3.02089	16.5214		-6.85611	34.8473		27.4767	-3.66173		43.8612	8.36505		-12.3002	-46.7175
77	-3.67697	14.4048		-11.8466	2.87258		32.5447	58.1787		62.2168	50.3718		-7.37812	24.13		1.25575	-3.87686		7.4684	24.022		-3.68503	17.308		-7.50742	34.9965		27.3275	-3.76365		45.1067	8.57138		-13.4288	-47.3887
78	-3.60443	14.9239		-13.1974	3.94456		33.1105	57.9965		65.3892	49.6496		-8.09385	24.3364		1.51689	-4.37336		7.88913	25.2923		-3.22561	17.2742		-7.80821	34.9493		27.7675	-4.01224		47.779	9.07105		-13.839	-47.6298
79	-3.33523	14.8288		-13.328	4.6748		31.9676	58.0723		65.7454	50.3605		-9.0272	26.9655		1.09777	-4.03484		8.02615	25.3713		-4.46202	18.0931		-8.24822	34.7703		27.9987	-4.14151		47.6448	11.0573		-11.1592	-47.8312
80	-2.93223	14.0921		-13.278	4.74573		31.2019	58.3834		67.5202	51.1617		-11.5693	27.7167		1.8409	-3.32717		9.61558	25.1246		-3.4384	16.847		-9.19286	35.8442		27.6283	-2.24477		47.2843	14.0478		-11.1145	-47.866
81	-2.77425	14.5676		-13.4908	3.44968		32.1626	57.6838		69.8576	51.642		-12.1142	27.5878		2.20199	-3.23367		8.43237	25.7372		-4.90854	17.5498		-10.2668	35.5484		28.2895	-1.40702		46.3173	15.8078		-9.28484	-48.2091
82	-2.81455	15.1721		-13.7762	3.97358		30.4749	58.9283		69.1145	52.3819		-12.9299	26.6818		2.05369	-3.67697		8.46461	26.756		-3.94134	18.3897		-11.1866	35.6826		28.5978	-1.52386		46.1333	17.1651		-14.4729	-50.3618
83	-2.37286	15.9459		-15.0899	2.5115		31.8966	57.384		68.8469	51.9644		-12.5172	28.1939		1.88765	-3.74951		9.19162	27.4959		-3.11277	17.5402		-8.7976	35.7746		31.4988	-0.887466		48.8156	17.9258		-10.938	-51.744
84	-1.76514	15.3495		-13.349	3.14018		31.1245	57.5661		70.2413	52.4013		-13.781	27.7683		2.35674	-4.36207		8.25666	28.2567		-2.13268	18.2414		-9.63286	35.7		31.7499	-1.44679		46.2601	18.7859		-10.2245	-52.4599
85	-0.641576	15.9894		-13.0604	2.5921		32.0401	57.4033		70.0027	53.6828		-14.0776	28.0859		1.42662	-4.15412		7.62315	29.98		-2.77909	18.0173		-10.9181	36.938		30.942	-0.512095		48.8131	20.7747		-9.9958	-52.4028
86	-0.182156	15.7799		-13.7826	3.81399		30.686	60.263		72.0983	53.9246		-15.5074	28.642		1.89088	-3.8559		5.3196	29.7398		-3.23045	18.5396		-10.053	36.5278		33.8704	-0.280907		49.4744	21.6472		-8.56144	-52.619
87	-1.08488	16.2345		-12.256	3.58348		30.2798	60.5129		71.3487	54.7661		-16.2506	28.0891		2.02145	-3.40293		8.05355	30.3266		-3.65924	19.5439		-10.575	36.3737		32.5703	-1.16092		48.8131	22.5123		-5.17067	-52.4351
88	-0.968812	16.1361		-12.4672	1.52818		30.3491	63.4773		74.3003	55.9557		-16.6423	29.9655		2.19071	-4.42816		7.23304	30.9407		-6.11593	18.9765		-11.4053	36.3513		32.8064	-1.66307		47.4931	23.7354		-5.69768	-52.9298
89	-0.501332	16.8293		-12.7687	2.95641		31.2373	62.2861		74.6195	56.8133		-17.2677	30.1396		2.24068	-3.57058		8.15027	31.9015		-6.70592	18.7508		-11.7558	37.2313		33.7287	-0.265991		47.8461	26.1566		-1.35482	-51.299
90	-0.867256	15.9427		-11.7176	3.89943		30.5796	61.954		75.98	56.9068		-17.2065	30.6586		1.44596	-3.32233		7.69891	32.1578		-8.89824	19.4649		-10.7913	37.7583		34.6211	0.226217		48.0624	27.8446		-3.47032	-52.7757
91	-0.936572	16.5681		-13.1991	3.88976		30.8005	63.005		76.8634	57.1841		-17.4789	30.952		2.2568	-3.63828		7.49902	33.4683		-10.125	18.9346		-11.5619	37.3382		35.6478	-0.265991		49.984	28.3293		-1.49154	-52.7409
92	-0.42718	17.6417		-12.7026	3.15146		31.376	66.0404		77.3099	56.5232		-18.567	31.2438		2.03596	-4.05579		5.52594	33.2427		-12.2609	18.2607		-9.50608	37.3457		37.7111	0.467349		49.6335	28.9582		-2.84387	-53.1958
93	-0.067704	17.2468		-13.831	2.97898		31.8934	64.3607		77.4614	56.5054		-20.0565	33.0702		1.88765	-3.18692		6.1256	33.9213		-13.112	17.4838		-10.7938	37.0126		38.0566	0.668707		52.9198	29.9153		1.44182	-53.9838
94	1.18482	16.9228		-13.9132	3.39971		31.3373	65.1699		77.0117	57.903		-19.8969	32.9928		2.10205	-3.41422		7.58607	33.5296		-10.9326	18.8878		-10.9554	39.0684		37.6614	4.20117		52.2263	31.5237		0.967015	-52.5743
95	0.648024	18.6122		-14.4822	4.98108		30.4571	67.4042		78.6124	58.8267		-19.4875	34.8063		1.23318	-2.87742		5.18742	35.0965		-10.4667	18.5815		-11.8826	38.5687		38.1809	4.6188		54.1802	32.8586		2.68477	-53.0839
96	0.992992	18.696		-13.3248	3.50932		32.3545	67.5283		79.2524	58.3625		-19.6325	35.3995		1.2767	-2.89999		3.83817	35.3318		-14.3387	18.1318		-10.6471	38.6185		40.5848	4.42987		51.7316	34.2259		2.26465	-55.008
97	0.109616	19.6438		-13.025	3.50771		30.6876	67.8023		80.0729	58.8251		-20.0952	36.7842		1.55074	-1.95052		3.13856	36.2474		-11.1147	18.9781		-12.6184	38.3699		39.0212	4.49451		51.3363	35.6304		3.70399	-55.8308
98	-0.124124	18.9603		-13.27	4.51038		30.304	67.5702		81.7623	59.5989		-20.0017	37.7224		1.1558	-1.96825		4.40721	35.8799		-10.7585	19.3424		-13.3393	38.3276		39.6501	4.96931		52.8726	37.736		6.84617	-56.7108
99	-0.407836	19.8615		-13.3522	3.75274		29.4641	67.4429		82.212	60.8046		-20.2902	38.1705		0.944632	-1.69421		4.9569	37.1776		-11.7821	19.1199		-11.3084	39.6998		42.0714	6.55283		50.7248	40.8657		9.25003	-55.2566
100	-0.6045	19.0958		-15.2785	4.67319		30.1718	67.6234		83.8885	61.2415		-20.7174	38.738		1.26542	-1.45402		2.00694	37.6402		-12.4269	19.0023		-12.9143	39.8689		41.0696	5.81452		51.6669	42.4666		7.13205	-57.0191
101	-0.706056	21.0608		-14.1002	5.89992		30.0316	67.5331		84.2915	62.357		-22.0634	38.9701		1.97631	-1.38954		0.275652	39.2087		-13.4457	19.2876		-12.253	39.501		43.6673	6.92075		51.4855	43.7295		10.0977	-58.0532
102	-0.294996	19.7712		-13.4521	5.01654		30.9568	67.6766		85.3232	61.0432		-23.3337	39.0684		1.45241	-1.52495		0.89466	39.3215		-16.7148	19.9275		-14.5351	39.4413		42.2255	7.01272		51.3363	44.6169		9.54834	-59.2564
103	-1.10583	21.5379		-13.3151	6.38352		30.578	68.8759		86.6611	63.2517		-24.0252	39.4569		2.18587	-1.82801		-0.414284	39.6842		-18.5461	23.3611		-13.9111	39.8415		42.4318	6.81882		51.2046	45.0047		10.1648	-60.2582
104	-1.88604	21.6943		-13.1442	5.48402		31.0649	69.0549		88.5826	64.5751		-24.7329	39.5939		1.6652	-1.49755		-0.722176	39.8438		-20.4788	24.4653		-12.2629	40.9105		45.052	8.66833		49.2482	46.9984		12.6632	-58.6548
105	-0.768924	20.8947		-14.7466	6.90258		31.3405	68.0264		89.4483	65.502		-25.5002	41.3478		2.60822	-1.08488		-0.752804	40.4805		-20.2596	25.2858		-14.811	40.7414		43.3243	8.0568		48.2911	47.8113		13.9832	-59.142
106	-1.82317	22.0763		-14.1147	5.98213		31.384	68.8582		90.3091	65.66		-24.8715	42.7938		2.79682	-1.38954		-0.109616	39.8728		-22.2085	25.4196		-13.655	40.8309		45.5939	7.65657		47.6348	48.0624		17.4759	-58.8263
107	-3.49482	23.8608		-13.4167	6.42382		31.5339	70.3977		91.452	66.3999		-25.4212	43.9657		2.7001	-2.02628		-0.39494	40.2597		-23.374	26.3078		-12.9863	40.8583		46.6156	7.55465		47.7193	48.2215		16.571	-58.3466
108	-3.22078	24.259		-14.2533	6.76718		30.8037	70.8522		92.6964	66.9238		-25.9306	45.3762		3.38036	-2.32773		-0.833404	41.3978		-24.13	26.0612		-12.1809	43.2422		46.6479	9.75964		48.756	50.7223		20.2079	-58.6672
109	-3.85752	24.6555		-14.8949	7.66828		30.973	71.1891		91.0522	68.1731		-26.1563	45.5438		3.29009	-2.58242		-1.02846	40.8997		-25.2439	26.569		-13.6128	43.4809		45.7778	8.28799		47.9729	51.3662		22.3632	-57.6455
110	-3.21755	24.6491		-14.8014	7.48452		31.4018	70.9409		93.2558	70.6266		-27.4395	45.7824		3.76402	-3.20949		-1.41695	42.3505		-25.8484	27.5168		-13.4089	43.9333		46.2551	9.37681		47.861	52.6166		22.5819	-58.1725
111	-3.24979	24.3525		-15.7895	8.56294		29.8881	71.0553		95.4111	70.5314		-26.5222	46.2547		3.80754	-2.76136		-1.5185	42.7035		-26.8043	29.4416		-14.3958	43.4237		46.6181	10.4507		47.0059	53.7178		25.0479	-58.0308
112	-1.94085	23.4868		-15.48	7.23788		30.4168	70.5895		95.7721	70.5927		-26.5964	46.8705		4.3524	-2.93706		-1.48626	42.9985		-27.5152	30.3233		-11.4376	44.5672		48.5496	10.6943		47.0133	55.709		25.8558	-57.0787
113	-1.22512	23.7577		-15.6493	8.88696		28.7581	71.4406		97.9983	71.5938		-25.4357	47.1446		3.52222	-2.89193		-1.59427	43.7932		-27.5152	29.5496		-11.6663	44.9998		49.636	11.2263		44.2068	57.1956		28.4213	-55.5872
114	-1.54752	23.8721		-14.9723	9.20613		28.376	72.5787		98.7189	70.9973		-26.1031	47.1091		4.84084	-3.75757		-1.59266	43.9157		-28.0972	31.3067		-12.4817	45.0221		50.511	10.5477		42.6531	58.6921		29.0154	-54.118
115	-0.469092	25.6743		-13.2023	8.60969		28.9386	72.6206		99.4298	71.8485		-26.3755	49.1886		4.38786	-3.4787		-1.86992	44.7314		-29.1079	31.2809		-14.0478	44.8382		48.5123	12.4022		42.6605	60.7405		28.6972	-55.6021
116	-0.04836	26.2369		-13.8825	8.38885		28.7017	73.3524		100.239	73.3815		-27.6925	49.0096		4.43461	-4.04773		-1.41211	44.8442		-28.7887	32.1965		-14.0155	45.2782		49.181	11.5271		38.7626	62.2942		30.7406	-58.3838
117	-0.108004	25.9419		-12.8702	7.82465		28.7855	71.6534		101.857	74.5453		-27.6152	49.4223		5.347	-4.14929		-3.04184	44.949		-30.4942	30.9472		-13.4835	46.7871		49.9517	12.1038		40.4754	64.887		32.4211	-60.0718
118	0.269204	26.4658		-13.1733	9.09007		30.1589	73.072		102.386	75.785		-28.5292	49.1515		5.08908	-3.85429		-2.87097	45.1167		-31.2406	31.9337		-11.8006	46.7324		52.4798	10.6471		38.0666	66.3338		33.3981	-60.2234
119	0.246636	26.7995		-13.2313	9.97344		30.0138	71.8501		102.878	76.4378		-27.8618	48.1988		5.93861	-4.11221		-3.18209	46.6787		-31.9337	32.585		-11.3755	47.1575		52.7185	11.0175		39.1554	68.0789		34.5466	-59.7237
120	-1.2622	26.7834		-11.4645	8.9337		29.282	72.2531		103.916	78.4996		-28.2052	47.8022		5.24867	-4.16057		-2.93062	46.0516		-33.1347	33.4006		-13.404	47.1575		51.1474	8.86472		38.5663	69.5058		34.5068	-58.9183
121	-1.14452	27.4846		-12.0223	9.87995		30.312	72.6835		104.529	77.3002		-28.4953	48.044		6.1127	-4.66029		-2.6195	46.071		-33.3603	32.5173		-10.8112	48.1867		53.7775	11.7931		36.5054	71.2981		38.3525	-57.1484
122	-0.536796	27.7409		-11.6241	9.55432		29.6721	72.5352		105.075	77.7564		-28.2084	47.8683		5.51465	-4.25407		-2.19393	46.5739		-33.5328	33.4393		-12.4071	48.0375		52.6215	9.04619		35.7348	72.3248		37.5495	-57.8245
123	-1.37987	29.0257		-11.5032	8.49202		30.3153	72.8205		106.988	79.9891		-28.1004	48.1182		6.14817	-4.13962		-1.21545	47.0656		-34.8627	32.5979		-11.8403	48.2016		52.6464	9.0089		35.8019	72.9363		38.3798	-57.3298
124	-0.45136	28.692		-10.7504	11.0245		28.8951	72.8173		107.798	80.7306		-27.894	48.8001		6.10142	-4.61032		-1.48304	47.3041		-36.5892	34.2776		-11.3332	48.3607		53.5314	8.3924		34.9493	74.05		40.8856	-56.9818
125	-1.20578	28.8016		-12.6864	10.8052		29.3803	73.3138		107.856	82.9197		-27.6571	49.548		6.34322	-4.40237		-2.29226	47.0478		-37.6741	33.6844		-11.552	48.8977		53.5488	10.2966		34.8623	75.3029		40.4655	-54.5382
126	-0.930124	29.1836		-13.0105	10.528		29.6124	73.9344		110.585	84.0594		-28.1149	49.756		5.45984	-4.89403		-1.81511	46.9382		-39.4279	33.6876		-9.41659	48.8803		56.0421	11.2586		34.6559	76.2749		42.9365	-55.2342
127	0.227292	29.3078		-12.9847	11.1131		29.7221	73.9731		110.536	84.8234		-28.9483	51.0053		6.27229	-4.02355		-1.27026	46.9011		-40.0147	34.126		-9.04619	48.9722		55.8607	10.5203		36.7068	76.6328		40.7986	-54.7047
128	-0.39494	30.4765		-10.6521	10.2459		28.9209	73.6845		111.446	82.7488		-28.0295	50.8973		6.20781	-4.94078		-1.6394	47.8345		-41.6976	34.4968		-8.09906	49.0667		56.2957	12.0168		34.1165	77.1226		43.3665	-54.7221
129	-0.06448	30.0316		-12.1271	9.98795		29.8043	75.0628		111.044	84.8331		-29.0853	50.5894		5.73711	-4.46524		-0.307892	48.0344		-42.1602	34.6306		-8.95918	50.2624		54.3443	15.2162		31.5635	78.4575		43.3118	-51.0753
130	-0.498108	30.549		-12.5672	7.97295		29.1159	74.21		112.653	85.5424		-28.3422	50.2702		5.0649	-4.53133		-0.938184	48.1778		-42.1796	34.5967		-7.73861	51.9031		55.2143	14.8433		13.2598	71.7679		43.3864	-51.9677
131	0.349804	28.8322		-11.8256	8.62742		28.5147	74.6066		112.613	86.3339		-28.5034	50.0574		5.17774	-5.5888		-0.494884	48.9049		-42.6422	35.1738		-6.25701	51.4556		57.2254	16.8942		12.2157	72.2676		45.0296	-52.1542
132	-0.132184	29.4835		-11.1035	7.86172		27.9263	74.1085		114.855	86.2904		-28.7774	50.778		5.57752	-4.91499		-0.319176	48.3084		-44.5637	36.3941		-5.14084	52.1542		57.3398	17.8885		13.8216	72.2129		43.9557	-50.8043
133	1.42823	29.0982		-10.7762	7.94232		28.7855	73.238		115.076	86.8014		-28.2535	50.8441		5.94183	-4.61999		-0.762476	49.1741		-46.5336	36.7052		-4.10173	52.3506		57.6058	19.3577		11.4028	72.7001		46.6827	-48.843
134	1.9876	30.1637		-9.2964	8.34694		28.9821	74.0295		116.285	88.3183		-28.7549	51.3906		5.24867	-4.944		-1.09938	49.0241		-47.3186	37.0502		-2.95076	54.6351		57.7897	19.3105		10.7217	73.6821		47.6597	-45.4199
135	0.986544	31.4292		-10.154	9.10619		30.0848	74.023		116.066	87.2914		-27.936	51.4518		4.95045	-5.38892		-1.80866	49.7028		-48.0489	36.8713		-4.80276	54.9906		56.5393	19.8375		10.1574	73.605		45.9121	-42.2504
136	2.48409	30.5958		-9.2964	9.85416		28.7017	74.4422		115.619	87.7573		-28.4437	51.8194		5.60815	-5.23416		-0.954304	49.4836		-48.7437	36.1362		-4.07688	55.4878		56.8625	20.9885		12.2008	74.659		46.3198	-40.1995
[truncated: 703 more rows]

## Sheet: 3H
Grad_off	Grad_Inh_off
0.287436	0.05478241107590867
0.11397	0.009897493516292459
0.105373	0.02008493674118414
[truncated: 20 more rows]

## Sheet: 3I (top)
	Cell 0	Cell 1	Cell 2	Cell 3	Cell 4	Cell 5	Cell 6	Cell 7	Cell 8	Cell 9	Cell 10	Cell 11
[truncated: 838 more rows]

[truncated: 1 more sheets: 3I (bottom)]
