# Supplementary material for: Cells use molecular working memory to navigate in changing chemoattractant fields
Source: eLife. 2022 Jun 6;11:e76825. doi: 10.7554/eLife.76825 (PMC9282860; doi:10.7554/eLife.76825)
Supplement: Figure 4—figure supplement 1—source data 1. [file elife-76825-fig4-figsupp1-data1.xlsx]

## Sheet: Supplement 1E
	1 -Set1	1 -Set2	1 -Set3		235 -Set1	235-Set2	235 -Set3		245-Set1	245 -Set2	245 -Set3		275 -Set1	275 -Set2	275 -Set3		345 -Set1	345 -Set2	345 -Set3		360 -Set1	360 -Set2	360 -Set3		540 -Set1	540 -Set2	540 -Set3		625 -Set1	625 -Set2	625 -Set3
1	0.000769237	0.0265943	0.0577895		0.000634126	0.00699939	0.00353207		0.00454474	0.0125354	0.0655652		0.00165299	0.00501849	0.0418414		0.00190582	0.02333	0.0442119		0.0069019	0.0102437	0.0104847		0.000821543	0.00914707	0.000528965		0.00747684	0.0024375	0.00793879
2	0.00619309	0.0131868	0.00876083		0.00409675	0.00445751	0.0641705		0.00692706	0.0147241	0.000821198		0.00211419	0.01354	0.0252215		0.00733025	0.00701388	0.0039694		0.00647244	0.0126223	0.0695048		0.00820082	0.0142155	0.0274157		0.00828324	0.00661597	0.00684386
3	0.0112149	0.00386099	0.0112897		0.00789561	0.00876104	0.00932555		0.00751356	0.0107446	0.0242278		0.00372913	0.00601225	0.0158926		0.00172266	0.0149233	0.00602266		0	0.012929	0.0356698		0.00574106	0.0110111	0.0019349		0.0114352	0.0184054	0.0212162
4	0.00626711	0.00496445	0.0643618		0.0132208	0.0142061	0.0183768		0.00502123	0.0110929	0.0436644		0.00638062	0.0188732	0.031052		0.003262	0.0153212	0.00917086		0.00874535	0.00560964	0.00901393		0.00512571	0.00273835	0.0040438		0.00260234	0.0170125	0.0655652
5	0.00549787	0.0163879	0.006232		0.0051025	0.0108882	0.0775991		0.0036652	0.0165645	0.0266914		0.00399854	0.00632694	0.0561292		0.00820994	0.00517344	0.0160147		0.00252923	0.00249935	0.0343811		0.00652039	0.0227189	0.0165232		0.0184723	0.00736215	0.0569418
6	0.0123151	0.0198075	0.0102755		0.00752251	0.0301226	0.0260063		0.00377507	0.0132317	0.0113607		0.0023836	0.00230014	0.0230336		0.00798991	0.00134325	0.0557103		0.0121742	0.0184155	0.0457832		0.000779329	0.00856341	0.0792681		0.00219915	0.0053724	0.0264177
7	0.0050581	0.00524195	0.0515575		0.00640615	0.0225545	0.0568209		0.0190954	0.0130826	0.0188892		0.00837913	0.00120286	0.0431519		0.00135603	0.0227828	0.0339461		0.0133743	0.0221367	0.0169139		0.0117679	0.039382	0.0746954		0.00432486	0.000597064	0.0247753
8	0.00362848	0.0171046	0.0485215		0.0054004	0.0114056	0.0448086		0.00381179	0.00502413	0.0113607		0.0121844	0.00491497	0.0119555		0.00557102	0.0250214	0.0302505		0.00698678	0.00243898	0.0411889		0.000287378	0.0120008	0.00737767		0.00513125	0.0017908	0.0301133
9	0.00725696	0.0190362	0.0374054		0.00450672	0.0112495	0.0288331		0.00282223	0.00601891	0.0325775		0.00576569	0.00407856	0.0287198		0.00461804	0	0.00985546		0.00222878	0.00969553	0.0261098		0.00147748	0.0249912	0.0569472		0.00340859	0.00631754	0.00985492
10	0.00542385	0.000220691	0.054927		0.00495356	0.00720676	0.0121523		0.00311541	0.0184052	0.0537936		0.00795751	0.00596049	0.0679346		0.000293181	0.0117396	0.0387367		0.00304356	0.0100626	0.0275806		0.0108246	0.0045447	0.0478017		0.0193886	0.00502413	0.0324403
11	0.00630339	0.0110345	0.0358841		0.0114334	0.0151383	0.0432524		0.0035919	0.00989894	0.00574893		0.00442016	0.0134882	0.0328012		0.00183253	0.0265135	0.0162885		0.00548791	0.00792788	0.00570106		0.00254256	0.00687472	0.0086096		0.00428828	0.00820781	0.0206687
12	0.177721	0.0036403	0.0992383		0.00171362	0.00943654	0.00918561		0.00465476	0.00965014	0.0440753		0.00711122	0.00596049	0.0115168		0.00216243	0.0216883	0.00506433		0.003215	0.00780472	0.0145257		0.00168205	0.0250489	0.0597591		0.00194254	0.00198975	0.00698046
13	0.52624	0.0117512	0.386524		0.0207802	0.00762151	0.0231795		0.00590092	0.045615	0.0216271		0.0180657	0.0208607	0.0120998		0.0116184	0.0117396	0.0193001		0.000986229	0.00658523	0.0327283		0.00475716	0.00786441	0.0423589		0.00439815	0.00328316	0.071725
14	0.812889	0.164484	0.828483		0.1846	0.00311061	0.136122		0.0116551	0.0100979	0.0206687		0.105203	0.00784242	0.0231837		0.0146605	0.0141274	0.00410599		0.00728723	0.0261598	0.0524017		4.22137e-05	0.00372804	0.0351483		0.0129746	0.01557	0.0402425
15	0.937393	0.85024	0.798323		0.614427	0.0268046	0.476779		0.0221373	0.0381534	0.0669344		0.549377	0.0187158	0.310659		0.00864971	0.00412883	0.00917086		0.0121742	0.0225014	0.153164		0.0032813	0.0101944	0.0687236		0.0124981	0.00457657	0.0543411
16	1.04995	0.830321	1.15991		0.822078	0.294605	0.802456		0.0186189	0.00318349	0.0510563		0.775731	0.129971	0.834144		0.0215143	0.0199972	0.0209425		0.0189896	0.0273189	0.00956001		0.00164146	0.0111841	0.0298795		0.013781	0.0071632	0.0405162
17	0.928414	0.892175	0.881054		0.972975	0.760463	0.920627		0.0145139	0.0422822	0.0387367		1.06074	0.809521	1.11243		0.00740355	0.0162663	0.0262811		0.0297481	0.0245757	0.107927		0.0145556	0.0166032	0.105633		0.0179958	0.0298962	0.0323037
18	0.935304	0.958774	1.06286		0.982099	0.895634	1.03187		0.00795333	0.00965014	0.0191629		1.0474	0.988845	0.84741		0.0175193	0.0283542	0.0205321		0.0149173	0.0278067	0.0919305		0.0136951	0.0120585	0.0736444		0.0339758	0.0239269	0.0228586
19	0.978663	0.980624	0.892851		0.977184	1.06305	1.20107		0.00857642	0.0286028	0.0146461		1.20564	1.04134	0.93925		0.0113985	0.0401434	0.047771		0.00870122	0.0341481	0.0251924		0.00758547	0.0487598	0.102292		0.00839325	0.0226833	0.115664
20	1.0155	0.999219	1.05814		0.929591	1.0222	1.03201		0.0105923	0.0439736	0.0713142		1.0017	1.13732	0.935168		0.020708	0.0279064	0.0782952		0.0144455	0.0328078	0.0235323		0.0168514	0.0187578	0.0472797		0.0162733	0.0165647	0.0340827
21	1.0965	1.0113	1.0509		0.953462	0.926796	1.37649		0.011875	0.0261652	0.0754207		1.0195	1.02115	1.18941		0.00194254	0.0248222	0.029703		0.0172751	0.0195142	0.09469		0.00832421	0.0175352	0.0912186		0.0249963	0.0222854	0.0286075
22	1.08195	1.01108	1.23911		0.914321	0.904966	0.91045		0.0230536	0.0165645	0.0639228		0.924135	1.08123	0.899746		0.0223207	0.0309906	0.0525616		0.0102018	0.0113424	0.0121375		0.0208698	0.0192239	0.000702966		0.0290278	0.0276576	0.106082
23	0.88806	1.02201	0.97693		1.08987	1.0925	1.10184		0.0136342	0.0247724	0.071725		0.887081	0.999093	0.972784		0.0353685	0.0323337	0.0266914		0.0253771	0.0097559	0.0895423		0.0284959	0.0371673	0.0333944		0.0065973	0.0245238	0.0290184
24	0.958944	0.92324	0.949633		1.03442	1.12112	1.00007		0.0220641	0.0162165	0.0782952		1.13942	1.01525	1.00048		0.0215143	0.00751147	0.0428432		0.0126886	0.0308567	0.103333		0.0193533	0.0235355	0.0652019		0.0158334	0.028951	0.0292921
25	0.928083	0.947077	1.00068		0.933836	0.859859	0.781964		0.0233469	0.0280555	0.0405162		1.00923	1.08912	0.887941		0.0175926	0.0112422	0.018068		0.0157321	0.0169521	0.0546078		0.0230844	0.0484691	0.0845369		0.0102991	0.0186043	0.0836338
26	0.953264	0.840361	1.12757		0.988951	0.850422	1.0012		0.0112153	0.0229816	0.0469498		0.89304	0.88627	0.841579		0.0191319	0.00825765	0.100196		0.0140177	0.00774435	0.0518483		0.00988125	0.0319236	0.00966753		0.0444947	0.0181566	0.0511929
27	0.98592	0.893113	0.997487		1.16789	0.92358	0.653332		0.0116185	0.0265133	0.067071		0.987286	1.01519	1.08751		0.0149904	0.0500425	0.0585848		0.0411941	0.0201228	0.0538724		0.0231656	0.0199828	0.0522005		0.0124248	0.0168632	0.0819908
28	1.10046	0.921529	0.882742		0.88844	0.931202	1.04813		0.012718	0.0328309	0.0190263		0.926171	1.01718	1.04815		0.0258391	0.0364623	0.0401059		0.0367366	0.0314652	0.0459652		0.0366545	0.0497518	0.00808063		0.0242266	0.0241755	0.0124557
29	1.01953	1.11107	0.847185		0.940427	1.07871	1.21365		0.0296509	0.0435258	0.0724096		1.02722	0.999406	0.819712		0.0234568	0.0184054	0.0283338		0.0161599	0.0273189	0.0290514		0.0237809	0.0106604	0.0843629		0.0159067	0.0256182	0.0479081
30	1.05585	0.922578	0.756201		0.940241	0.997568	0.939709		0.0135244	0.0193005	0.0291555		1.16436	1.08855	1.05398		0.00388508	0.0227828	0.0392842		0.0319786	0.0273793	0.135697		0.0202544	0.00605806	0.0298795		0.0276351	0.0216387	0.0253227
31	0.98548	1.1077	0.566979		1.13255	1.1079	1.01336		0.0227239	0.0305925	0.0528353		1.02365	1.00845	1.01783		0.0155402	0.0189028	0.0288818		0.00673046	0.0160369	0.140291		0.012177	0.0300019	0.0583532		0.0231636	0.0436255	0.0692609
32	0.997025	0.909059	1.04011		0.947578	1.09836	0.818712		0.0332427	0.0104958	0.0219008		1.04167	1.05911	1.06346		0.0118017	0.0254689	0.0778848		0.0322349	0.0359785	0.0654566		0.0129158	0.0296513	0.0551863		0.0214411	0.0239269	0.076379
33	1.03313	0.955962	1.09454		0.975097	1.19973	0.890803		0.00223572	0.0196986	0.002327		0.971874	0.895471	1.22075		0.0141474	0.0397953	0.0377789		0.00347302	0.0189033	0.0375119		0.0471105	0.0223129	0.0518455		0.00974929	0.0182062	0.000136595
34	0.938017	0.939187	0.887119		1.08358	1.1878	1.0299		0.015247	0.0178083	0.0591322		1.02207	0.998151	1.13066		0.0218807	0.014028	0.0552994		0.0183462	0.0355511	0.0139723		0.0223456	0.0468381	0.0694266		0.0111053	0.0281054	0.0595426
35	0.947399	0.957174	1.15334		0.978263	1.10707	0.944657		0.0220275	0.0274585	0.0744624		0.995051	1.00265	0.922924		0.027012	0.0457646	0.039695		0.0188606	0.0203667	0.0761233		0.00758547	0.039089	0.0502656		0.0283314	0.0213403	0.0724096
36	1.06248	0.890519	1.03472		1.14961	0.871731	0.906918		0.0087963	0.0308909	0.124424		0.937357	1.01316	0.918554		0.0179958	0.0100981	0.0321666		0.0236627	0.0211611	0.0680341		0.0179587	0.0231849	0.0021089		0.0297609	0.0238274	0.0288818
37	0.920644	0.934552	0.760411		1.15095	0.945408	1.21846		0.015027	0.0123364	0.0355885		1.08741	0.974781	0.993918		0.0332061	0.0472071	0.0759682		0.0488667	0.0251239	0.0329103		0.0240261	0.0521395	0.0963133		0.0388138	0.0180073	0.0182051
38	0.88806	1.10312	1.15132		1.00679	0.995494	1.13775		0.0431753	0.025817	0.0383264		1.08968	1.19264	0.915639		0.0259124	0.0053724	0.0639228		0.028548	0.0553092	0.0713397		0.0243135	0.0273812	0.0565923		0.0227971	0.0381536	0.0605009
39	0.917381	0.998336	1.10667		0.985674	1.07446	1.01463		0.0206713	0.0184052	0.0610484		1.03322	1.16137	1.14509		0.0411227	0.0294983	0.0906142		0.0133319	0.0418924	0.0952433		0.0225502	0.0164278	0.0458738		0.0102991	0.0206936	0.100607
40	0.95132	0.994143	0.932111		1.05118	1.0069	0.749733		0.0188388	0.024076	0.0169731		1.04087	1.00432	1.31347		0.0170062	0.0551661	0.0317563		0.0355789	0.0481758	0.0351165		0.0262813	0.0318083	0.0523745		0.0109587	0.0130826	0.0709038
41	1.02576	1.09672	0.648702		1.0704	1.10422	0.855465		0.0206347	0.00994877	0.0923938		0.971642	0.976663	0.827442		0.0262789	0.0370594	0.0973215		0.0116599	0.0121345	0.0290514		0.00865218	0.0298266	0.00281186		0.0158334	0.0182062	0.071725
42	0.968511	1.02013	1.25764		1.12372	0.979214	0.991447		0.0155768	0.0196488	0.0283338		0.971642	0.918892	0.878023		0.0157601	0.00795902	0.042022		0.0187333	0.0113424	0.0650925		0.0319801	0.0216715	0.0492146		0.023017	0.0261652	0.0684397
43	1.05296	0.942884	0.847526		0.930037	1.16302	0.983958		0.0272686	0.019997	0.0277863		1.08934	0.969711	1.01768		0.00927279	0.0175099	0.00684386		0.0167608	0.0229288	0.0783295		0.0284553	0.0255172	0.0437649		0.0273419	0.0344229	0.057079
44	0.933509	0.93389	1.09184		1.11251	0.976413	1.0781		0.0154302	0.0261154	0.0688506		1.0489	0.978599	1.20165		0.00406825	0.0347213	0.0101292		0.0151754	0.013721	0.0647212		0.0442805	0.0362353	0.0184511		0.0335726	0.0155201	0.0295658
45	1.06894	0.945532	0.808772		1.13918	1.10236	1.15117		0.013781	0.0230314	0.0286075		1.19807	0.989369	0.872048		0.0207446	0.0257673	0.0569418		0.0300061	0.0432351	0.024275		0.00774946	0.0203312	0.0659118		0.0380074	0.0133314	0.0936258
46	1.02147	1.03724	0.957553		1.06473	1.0082	1.02495		0.0160167	0.00572047	0.0592688		1.09837	1.06476	0.79012		0.0391802	0.0206936	0.0574893		0.00424367	0.00871994	0.0476253		0.0154161	0.00792208	0.0231979		0.0131579	0.0071632	0.0433907
47	1.0965	1.05175	1.09268		1.05848	0.885575	0.983387		0.0150637	0.0162661	0.015741		0.999393	1.02576	0.9859		0.00989588	0.0310403	0.0455811		0.0469808	0.0247592	0.0643571		0.0161143	0.00885409	0.0309305		0.0295043	0.0252203	0.0249118
48	1.00029	1.02035	1.06202		1.08786	0.95412	1.04982		0.00974929	0.0313385	0.000273733		0.9294	1.03245	0.963161		0.0196817	0.0225838	0.0706301		0.0245199	0.0144527	0.0268452		0.00885675	0.0445081	0.0307565		0.00480135	0.00586979	0.0370943
49	1.10694	1.10626	0.874315		0.944934	0.996531	1.03314		0.00219915	0.00467586	0.0223111		1.0893	0.988218	1.05544		0.0177026	0.0207432	0.0572156		0.0457383	0.0329914	0.141027		0.012177	0.0329733	0.0843629		0.0299075	0.0212904	0.00711759
50	0.959164	0.935378	1.0086		0.986233	0.915181	0.958511		0.00799005	0.0188529	0.0485922		1.11486	1.13309	1.01462		0.0116917	0.0141274	0.0353148		0.00364446	0.0476252	0.0935905		0.0375572	0.0222529	0.168552		0.0181058	0.0191514	0.068166
51	1.02778	1.12707	1.06252		1.0469	1.129	0.762316		0.0091995	0.0272595	0.0249118		1.135	1.08008	1.18839		0.0114352	0.0124361	0.033809		0.0157321	0.0417113	0.0658279		0.0238621	0.0280802	0.0745214		0.0191687	0.0275085	0.0359994
52	0.89869	0.945478	0.879199		1.07367	0.993213	1.09732		0.00934609	0.0167637	0.0298396		0.981597	1.2353	1.23066		0.0134143	0.0172114	0.065839		0.0180899	0.0412839	0.116941		0.0547365	0.0235932	0.0868268		0.0252162	0.0401932	0.0580368
53	1.06879	0.936539	0.932612		1.01029	1.04428	1.22426		0.00989588	0.024275	0.0409271		1.01731	1.12776	1.11637		0.0181424	0.00726267	0.0969112		0.0234047	0.00853641	0.0924838		0.0173027	0.0341383	0.0922695		0.028918	0.0123364	0.082812
54	0.941571	0.873249	1.05713		1.04779	1.06974	0.979149		0.0100057	0.0246729	0.0402425		0.928477	1.08175	0.876424		0.0148438	0.0644682	0.077474		0.012731	0.009512	0.0626971		0.0224285	0.00535905	0.0639769		0.0144773	0.022534	0.062417
55	0.936806	1.10042	0.85241		0.985302	1.14777	1.2292		0.0366147	0.0116399	0.0421586		1.02534	1.00694	1.12862		0.0238966	0.0336269	0.0422958		0.0175756	0.0178673	0.00808924		0.0103326	0.00605806	0.0847179		0.0167496	0.0267125	0.0461286
56	1.03302	0.956292	0.826968		1.0447	1.12957	1.06015		0.0108854	0.0214396	0.038463		0.987402	1.02858	1.1276		0.0199383	0.0526291	0.00875999		0.0491247	0.0239044	0.0959787		0.0184912	0.0274389	0.101763		0.0160167	0.0132319	0.0255965
57	0.555854	0.913473	0.987879		1.15028	1.13362	0.96459		0.0119117	0.0363626	0.0789798		1.03007	1.05859	0.912285		0.0403898	0.0349203	0.112652		0.0165469	0.0174399	0.0489068		0.0346055	0.0284863	0.0144143		0.0146972	0.0223849	0.0190263
58	0.0785072	1.10969	0.880547		0.835373	1.19407	0.959502		0.0125348	0.0403423	0.0146461		0.837114	0.925062	0.980364		0.0233102	0.0112422	0.0276497		0.00518746	0.0171356	0.0564499		0.0119724	0.0146215	0.082957		0.0127914	0.0280555	0.020395
59	0.039803	1.04496	1.01534		0.301236	1.12289	1.1205		0.00630397	0.0246729	0.0381892		0.5242	1.0691	1.22308		0.00414155	0.0199972	0.00574893		0.006301	0.0338438	0.103704		0.00705293	0.0271482	0.0249588		0.0153569	0.0203951	0.0255965
60	0.0200481	0.635431	0.457625		0.0411504	1.01691	1.29875		0.00831981	0.0224842	0.107314		0.101282	1.02173	1.31201		0.00652386	0.0098493	0.0628279		0.00930212	0.0246361	0.0575494		0.000985527	0.0118831	0.133049		0.00736697	0.0203951	0.055436
61	0.0189116	0.21409	0.317272		0.0267763	1.01686	1.03258		0.00465476	0.0290007	0.0834966		0.0319807	1.00855	1.04888		0.0106288	0.0193505	0.0301133		0.00848734	0.0167082	0.0229863		0.00721692	0.0263316	0.0989512		0.003262	0.0179576	0.0307979
62	0.042295	0.123047	0.224939		0.0159387	0.703431	0.453174		0.000256606	0.0243744	0.0324403		0.023524	0.655397	0.606441		0.00417827	0.0183059	0.0432541		0.00874535	0.00969553	0.161435		0.00475716	0.0206219	0.0516715		0.0126814	0.0352686	0.0359994
63	0.0336084	0.0669304	0.152824		0.0105014	0.154301	0.295283		0.00538771	0.00721284	0.0235432		0.0231008	0.27275	0.364738		0	0.011292	0.0231329		0.004758	0.0221367	0.0873361		0.00311732	0.0221375	0.0738184		0.0133045	0.0232304	0.00643299
64	0.0145139	0.0705161	0.28475		0.0143372	0.0666245	0.215422		0.00139276	0.00775987	0.0305242		0.0267523	0.0866828	0.176977		0.0119117	0.00845661	0.0568052		0.0210469	0.0135979	0.107563		0.0042652	0.0228365	0.0388441		0.00476477	0.0208925	0.0329878
65	0.0199378	0.13546	0.323003		0.0042457	0.0612842	0.139088		0.00773345	0.00741179	0.0138249		0.0199105	0.069586	0.162545		0.0117284	0.0245736	0.0342198		0.01286	0.0085992	0.120618		0.00840539	0.0117101	0.0393661		0.0154669	0.00353176	0.0116345
66	0.0380439	0.131046	0.169839		0.00692672	0.0405447	0.120712		0.0205614	0.0255684	0.0286075		0.0203337	0.0903949	0.17042		0.00315199	0.0156196	0.0772002		0.000342888	0.0141485	0.0542438		0.0164828	0.0115924	0.0355033		0.00857642	0.00820781	0.0724096
67	0.0237128	0.144456	0.118788		0.0169444	0.0798472	0.187715		0.0149537	0.00741179	0.0687134		0.011262	0.109111	0.253219		0.00777002	0.00308421	0.0377789		0.00715822	0.00140301	0.124477		0.00446978	0.00594271	0.0803191		0.00406839	0.010297	0.00657013
68	0.0137069	0.0869586	0.0441445		0.0243932	0.075439	0.272669		0.012828	0.0102968	0.0321666		0.0123381	0.140008	0.173623		0.0058642	0.0107944	0.0852762		0.00985889	0.00908699	0.0114021		0	0.0116501	0.0349743		0	0.0282547	0.0260068
69	0.0107026	0.0432029	0.223418		0.00905031	0.0888669	0.241289		0.00820994	0.00925223	0.064744		0.0395136	0.120717	0.212694		0.0210012	0.0146248	0.0202579		0.0136748	0.023844	0.0678448		0.00225518	0.0130481	0.0390181		0.00799005	0.0200469	0.037368
70	0.00711037	0.106382	0.182643		0.00789561	0.114739	0.0964014		0.00480135	0.0113913	0.100196		0.0396673	0.0901858	0.0849933		0.0091262	0.00746163	0.0154673		0.00240022	0.00256213	0.052955		0.00762606	0.0134565	0.10967		0.00410497	0.00800886	0.0365468
71	0.0247752	0.126025	0.213142		0.0262543	0.103178	0.244116		0.00513125	0.00890416	0.0438016		0.0447024	0.0851135	0.205842		0.012828	0.011292	0.0710404		0.0122167	0.0243922	0.0726284		0.0022974	0.0139825	0.0323364		0.00458146	0.0117894	0.111283
72	0.0264255	0.133915	0.164788		0.0171686	0.116608	0.174991		0.0101158	0.00925223	0.0368206		0.0192575	0.0536403	0.237477		0.00267549	0.0104464	0.0673448		0.00921725	0.00493832	0.0125016		0.00824141	0.0363507	0.0258357		0.00249233	0.000547227	0.0889718
73	0.0280743	0.0266489	0.160404		0.00688985	0.14642	0.147994		0.0163099	0.0179078	0.0138249		0.015568	0.103517	0.260071		0.00414155	0.00746163	0.0822646		0.00921725	0.00414626	0.0553432		0.00898015	0.0045447	0.0117764		0.00245575	0.0129335	0.0881506
74	0.0205241	0.156264	0.403205		0.0216001	0.125681	0.139088		0.00421484	0.0131323	0.002327		0.016606	0.0655074	0.177266		0.00780674	0.00283542	0.0528353		0.0104598	0.00957479	0.0660099		0.00799624	0.0097861	0.0170452		0.0113619	0.0125852	0.0982798
75	0.0222469	0.168678	0.182817		0.00327681	0.0850316	0.185453		0.0036652	0.00437742	0.0406534		0.0244083	0.0934776	0.337774		0.00377507	0.0183059	0.045444		0.000772348	0.0103065	0.0343811		0.00401842	0.0180588	0		0.011142	0.0195991	0.06009
76	0.0261323	0.132923	0.255772		0.0140393	0.0766832	0.245672		0.00179595	0.00900364	0.0613221		0.0314799	0.0963015	0.165605		0.00722024	0.0111427	0.0171097		0.00818689	0.0102437	0.0441304		0.000655936	0.00611574	0.0446418		0.00751356	0.0105955	0.0249118
77	0.0203412	0.0870154	0.101093		0.0116945	0.122207	0.127216		0.0062674	0.0132816	0.0674819		0.03713	0.109895	0.274065		0.00384836	0.0119385	0.0629645		0.0118314	0.0198789	0.0507489		0.00483834	0.00547671	0.0711805		0.0107756	0.0269114	0.0603638
78	0.0313733	0.0531362	0.149788		0.00614513	0.135947	0.2591		0.00839311	0.0284036	0.0313454		0.0072269	0.112299	0.293456		3.65751e-05	0.0125356	0.0321666		0.0026158	0.0105504	0.120436		0.00832421	0.0440997	0.0261838		0.0125714	0.00402935	0.0238169
79	0.0197549	0.0950717	0.234708		0.0200354	0.119665	0.230547		0.00450817	0.0177585	0.0358622		0.0418972	0.125056	0.148552		0.00447145	0.0160177	0.0238169		0.0106312	0.0225014	0.0740992		0.0122598	0.0228365	0.0548383		0.00685391	0.0356665	0.0139615
80	0.0330598	0.170887	0.357713		0.0437208	0.0723797	0.106718		0.000989559	0.0108441	0.059406		0.0338255	0.0908131	0.211967		0.0055343	0.00855608	0.0641966		0.00694434	0.0156119	0.0546078		0.00873336	0.0302349	0.000348003		0.012095	0.0213403	0.0225849
81	0.0225038	0.148595	0.242628		0.0386183	0.139887	0.188845		0.00487464	0.0078097	0.00725473		0.0238314	0.0867863	0.19418		0.0030054	0.00979966	0.00643299		0.00437268	0.010915	0.0018421		0.00250197	0.00704775	0.222861		0.0188755	0.00766059	0.00574893
82	0.0351483	0.0954563	0.194607		0.0412256	0.0987182	0.329915		0.000733098	0.0122866	0.0239541		0.0259837	0.0489882	0.328589		0.000623082	0.00815817	0.0457177		0.000729911	0.00701266	0.142497		0.00241917	0.0244099	0.0430619		0.0125714	0.00552171	0.0399688
83	0.0551238	0.0788477	0.169505		0.0234995	0.144347	0.277897		0.0101158	0.00676509	0.044349		0.0107627	0.0919104	0.170564		0.000256606	0.0173109	0.0354519		0.00492945	0.0126851	0.0183846		0.00664216	0.0181165	0.0490336		0.016603	0.0123364	0.047771
84	0.0218434	0.199745	0.189215		0.0124392	0.0644481	0.261642		0.00388508	0.0237776	0.0762419		0.0289441	0.0831259	0.128578		0.00436143	0.0118391	0.0190263		0.0010728	0.00115912	0.0649032		0.00278935	0.0169515	0.0367352		0.00461804	0.0115406	0.0778848
85	0.0124979	0.162168	0.337662		0.0218597	0.030176	0.185313		0.0108854	0.0112918	0.0388738		0.0340173	0.103778	0.119249		0.00645056	0.0141771	0.0242278		0.0111456	0.00317067	0.0513022		0.00647818	0.0227789	0.123736		0.010629	0.0155201	0.0140986
86	0.0129377	0.137503	0.163266		0.024579	0.0710841	0.308432		0.00186925	0.0176092	0.0190263		0.0250232	0.0774801	0.0868868		0.000989559	0.00945139	0.0598163		0.00480214	0.0083553	0.062151		0.00176323	0.0122338	0.107742		0.00853984	0.0117396	0.022722
87	0.0351483	0.0898844	0.135636		0.0187701	0.087208	0.144742		0.00725696	0.0159677	0.0354519		0.0220628	0.0914404	0.295205		0.00443473	0.0239767	0.0620067		0.00930212	0.0249403	0.0643571		0.00225518	0.0312246	0.0877037		0.00238231	0.00950122	0.0655652
88	0.0361382	0.124535	0.165628		0.0385814	0.0944168	0.258389		0.00670717	0.0141769	0.045444		0.00288285	0.127671	0.225082		0.00410497	0.00900364	0.0336724		0.00338645	0.00500111	0.0919305		0.0296843	0.0251089	0.0731154		0.00414169	0.00890416	0.0826754
89	0.0150263	0.0914839	0.238584		0.0269622	0.0893351	0.259666		0.0062674	0.0100483	0.0132774		0.00618883	0.13682	0.167793		0.00711037	0.0191516	0.08336		0.00433024	0.0240879	0.0424776		0.0020912	0.0147968	0.10809		0.00949268	0.0345224	0.00561179
90	0.030054	0.184569	0.174556		0.0301284	0.111577	0.185168		0.0102258	0.0267125	0.0796638		0.0395136	0.0610127	0.186306		0.0135244	0.00935191	0.068166		0.00848734	0.00622059	0.043395		0.00463376	0.0308163	0.0764563		0.00351861	0.0144259	0.050098
91	0.0297245	0.171107	0.229823		0.027819	0.156167	0.173155		0.00872301	0.0180073	0.0169731		0.0353628	0.132847	0.249721		0.00916278	0.00751147	0.025049		0.00300112	0.0179277	0.0468899		0.00496173	0.0235355	0.0648539		0.00483807	0.0187535	0.0802113
92	0.0347449	0.152567	0.168658		0.00692672	0.114222	0.200298		0.00963927	0.0162165	0.00383226		0.0360158	0.135826	0.284998		0.00216243	0.00492465	0.0672082		0.012731	0.00158654	0.0334637		0.0042652	0.0265069	0.0087836		0.00461804	0.00979966	0.0316191
93	0.0230902	0.164264	0.154846		0.021637	0.0665732	0.202559		0.00337187	0.00940155	0.0339461		0.00522839	0.0863163	0.237038		0.0156135	0.010297	0.00944459		0.00604468	0.0123784	0.0264812		0.0053725	0.0330886	0.081899		0.0129013	0.00477553	0.0713142
94	0.0660093	0.159242	0.217019		0.00949715	0.10572	0.289629		0.00487464	0.0189524	0.000410328		0.031827	0.162175	0.135286		0.00725696	0.00850625	0.0650178		0.0141467	0.0242714	0.0233503		0.00561767	0.034196	0.0356773		0.0186189	0.0195495	0.0488659
95	0.264072	0.210229	0.339511		0.0299411	0.0730018	0.14107		0.0100057	0.0365618	0.0235432		0.0141448	0.0574041	0.142138		0.00322528	0.0203951	0.037368		0.00347302	0.00804862	0.0294227		0.0191066	0.0254572	0.124258		0.015137	0.0214894	0.0569418
96	0.587007	0.12266	0.287446		0.106619	0.110231	0.275356		0.0144039	0.0185543	0.00383226		0.0372837	0.0845379	0.214587		0.00751356	0.0114411	0.0354519		0.0242619	0	0.043577		0.0144322	0.0202158	0.0743474		0.0116918	0.0154207	0.0533833
97	0.657194	0.153338	0.472118		0.255728	0.122466	0.2591		0.0419657	0.0320847	0.0121819		0.217976	0.0706832	0.204381		0.0266088	0.0103469	0.0212162		0.0566258	0.00926811	0.0603089		0.0985235	0.0637896	0.0562443		0.0157235	0.0184054	0.05133
98	0.724339	0.56894	0.857127		0.405621	0.105927	0.237331		0.0505788	0.018654	0.0699455		0.431377	0.0651948	0.153505		0.0296509	0.0156694	0.0359994		0.0998773	0.0225014	0.0731818		0.205698	0.0213209	0.114945		0.0340858	0.00845641	0.0309345
99	0.745157	0.855591	0.733788		0.570335	0.105098	0.22814		0.0306405	0.0160672	0.0777477		0.574706	0.114966	0.165899		0.0323264	0.0106453	0.0943104		0.082687	0.0188429	0.13459		0.360719	0.0464298	0.174176		0.0605847	0.0109438	0.000410328
100	0.689887	1.03829	0.926213		0.550671	0.453987	0.721745		0.0383006	0.0371586	0.0773368		0.615411	0.304068	0.384712		0.0350753	0.0509378	0.050098		0.123968	0.0449423	0.158312		0.428246	0.109871	0.244305		0.0305306	0.0215392	0.0715879
101	0.653785	0.86602	0.984176		0.627089	0.74574	0.871016		0.0583856	0.0410387	0.0154673		0.636051	0.642797	0.534569		0.0396934	0.0917279	0.126751		0.137984	0.173795	0.118594		0.419227	0.341964	0.414618		0.0229437	0.0336269	0.049003
102	0.646126	0.984542	0.585855		0.639378	0.691921	0.835253		0.0307138	0.0786947	0.0911622		0.69828	0.621466	0.412116		0.0439815	0.0889423	0.0885615		0.126711	0.181235	0.185885		0.384089	0.458011	0.260125		0.0228339	0.0269114	0.031482
103	0.634763	0.838653	0.680716		0.528699	0.688032	0.610924		0.0299441	0.0764065	0.0176571		0.560601	0.536926	0.526262		0.0404263	0.0521814	0.067071		0.11235	0.169342	0.220084		0.492494	0.565612	0.350641		0.0739623	0.049147	0.0845916
104	0.566336	1.05782	0.985524		0.524677	0.600459	0.83949		0.0354785	0.0702383	0.0978689		0.598999	0.594384	0.354099		0.0189854	0.0660102	0.101017		0.13344	0.168917	0.295654		0.437225	0.451895	0.373665		0.0486363	0.0505895	0.0238169
105	0.66467	0.987411	0.897228		0.700005	0.76705	0.786487		0.0297609	0.0533255	0.0479081		0.565866	0.680595	0.420862		0.0658624	0.0914294	0.0930784		0.139099	0.132448	0.160518		0.466172	0.503276	0.40811		0.0369446	0.0459635	0.020395
106	0.653785	0.944593	0.808939		0.574281	0.582883	0.7527		0.0281116	0.0584491	0.0691243		0.545917	0.59496	0.499586		0.0180691	0.0704873	0.0354519		0.130826	0.125986	0.177432		0.417464	0.493257	0.330603		0.0436883	0.0350696	0.0190263
107	0.671525	0.953809	0.741375		0.563631	0.594808	0.701672		0.0458508	0.0682485	0.131678		0.596731	0.563538	0.538651		0.0363214	0.0578026	0.0985536		0.103006	0.159038	0.268809		0.508811	0.604819	0.289824		0.050982	0.0355172	0.0912988
108	0.546471	1.0022	0.735643		0.510824	0.667966	0.791435		0.0404996	0.0381038	0.0858236		0.572516	0.604266	0.535591		0.0418191	0.0617322	0.0287447		0.163103	0.167147	0.205194		0.413733	0.42603	0.534303		0.044055	0.0638215	0.00643299
109	0.68109	0.991606	0.652912		0.549479	0.599058	0.716657		0.055087	0.0453665	0.059406		0.572324	0.654246	0.493022		0.0527412	0.0572553	0.140439		0.143813	0.135803	0.0290514		0.434192	0.42836	0.416372		0.0425889	0.0291998	0.0657024
110	0.530857	0.798649	0.754012		0.594912	0.669522	0.783514		0.0282949	0.0436751	0.0792535		0.641356	0.605572	0.51941		0.0347087	0.0820279	0.0569418		0.162889	0.145013	0.0866007		0.459366	0.524832	0.500032		0.0492228	0.0675026	0.020395
111	0.711182	0.899071	0.955531		0.639563	0.543632	0.705915		0.0291378	0.0884445	0.0841812		0.548876	0.692883	0.489091		0.0290644	0.0723776	0.0177943		0.0907042	0.206052	0.14415		0.490771	0.475722	0.477711		0.0613177	0.0578026	0.0298396
112	0.568352	0.819339	0.792592		0.608282	0.758494	0.559192		0.0494792	0.084465	0.142766		0.602612	0.527987	0.430046		0.0276351	0.0499927	0.0637862		0.205455	0.147696	0.114917		0.532879	0.561476	0.304586		0.0320332	0.0590461	0.103344
113	0.726318	0.941615	0.704136		0.535626	0.663143	0.708742		0.0373844	0.0668556	0.0435278		0.58297	0.731883	0.422761		0.0686112	0.084515	0.0824017		0.117151	0.166051	0.121171		0.448746	0.485217	0.445019		0.0520449	0.0531764	0.0558469
114	0.600201	0.86878	0.731433		0.536817	0.664441	0.739982		0.0303106	0.0394468	0.0563944		0.643047	0.60667	0.597551		0.0524113	0.0626277	0.0748732		0.144714	0.151538	0.294737		0.409182	0.37016	0.698644		0.0417825	0.0790432	0.0542045
115	0.658367	0.79153	0.850221		0.529146	0.770885	0.683441		0.0560765	0.0334279	0.0347673		0.491298	0.563433	0.377566		0.0238233	0.0608866	0.044349		0.130311	0.18904	0.147274		0.434028	0.479217	0.220752		0.0590819	0.0308413	0.0544782
116	0.518359	0.87093	0.933626		0.58065	0.583037	0.755952		0.0285513	0.0269611	0.145367		0.520241	0.565787	0.474803		0.0340123	0.0432772	0.0819908		0.13897	0.140439	0.25796		0.496798	0.551221	0.53905		0.0347089	0.0520819	0.0761053
117	0.593054	0.979687	0.730085		0.579049	0.649922	0.860274		0.0358083	0.0812317	0.0198475		0.585699	0.647188	0.473493		0.0292477	0.084515	0.0641966		0.123839	0.196601	0.121907		0.462769	0.568816	0.442562		0.0503589	0.0272597	0.0488659
118	0.588436	0.812443	0.57642		0.520134	0.696378	0.743794		0.02386	0.115903	0.0741886		0.579396	0.577445	0.687491		0.0496258	0.060638	0.0143723		0.118137	0.180685	0.123559		0.565637	0.460401	0.43957		0.0250329	0.0295479	0.0353148
119	0.60548	1.03299	0.945082		0.551825	0.549958	0.806134		0.0398767	0.0528279	0.0184789		0.511786	0.538862	0.489091		0.0734125	0.0631748	0.0387367		0.164303	0.174771	0.154081		0.423531	0.520112	0.281388		0.0473168	0.0333284	0.0406534
120	0.648801	0.743635	0.945249		0.613942	0.664597	0.879921		0.0311903	0.0584491	0.172195		0.663189	0.546129	0.468973		0.0399498	0.0781975	0.004654		0.129196	0.12306	0.134037		0.392904	0.475313	0.351518		0.0535476	0.0609364	0.0715879
121	0.542952	0.88765	0.860163		0.519911	0.718623	0.881897		0.0224672	0.0420833	0.0533833		0.529505	0.617754	0.708776		0.0378241	0.0641697	0.0535199		0.121695	0.111961	0.183133		0.427426	0.618158	0.36312		0.0547571	0.0630753	0.03203
122	0.562085	0.875621	0.818207		0.593721	0.589883	0.727964		0.0510919	0.0552654	0.0465389		0.468083	0.557265	0.379609		0.0513485	0.0701888	0.208605		0.169404	0.186538	0.105175		0.550385	0.48411	0.456622		0.0450445	0.046262	0.0335352
123	0.596536	0.938634	0.858982		0.548324	0.590815	0.582657		0.0148804	0.0777498	0.0945842		0.480306	0.608448	0.447249		0.0319965	0.084913	0.101565		0.194952	0.247399	0.193246		0.501555	0.545048	0.373484		0.0499557	0.0456649	0.0747361
124	0.575095	0.875401	0.792765		0.470345	0.643389	0.784365		0.0609878	0.0645675	0.12237		0.581049	0.544926	0.360952		0.0408662	0.0577527	0.0473601		0.104163	0.146109	0.1607		0.463712	0.560078	0.319355		0.0306772	0.0459137	0.0491396
125	0.549183	0.882795	0.781476		0.49604	0.860791	0.65856		0.050982	0.077302	0.0120453		0.568519	0.596372	0.538506		0.0171161	0.0718303	0.0484556		0.145313	0.253861	0.220455		0.476873	0.453702	0.406356		0.0364681	0.046809	0.0804856
126	0.488048	0.770232	0.697397		0.643325	0.763315	0.941551		0.0196084	0.0349201	0.0442119		0.459972	0.581366	0.554254		0.0466204	0.0719298	0.0606375		0.133397	0.175198	0.122824		0.475807	0.478402	0.534303		0.0714334	0.0795904	0.0136877
127	0.593458	0.843012	0.87954		0.568472	0.558877	0.852213		0.0530344	0.0321345	0.0767894		0.509748	0.621779	0.514307		0.0453377	0.0617322	0.038463		0.134855	0.239044	0.19104		0.434889	0.521162	0.561726		0.0391803	0.0698406	0.0802113
128	0.614018	0.694417	0.835562		0.566573	0.639034	0.625204		0.0411227	0.0753123	0.0745995		0.601035	0.548951	0.467662		0.0613177	0.109287	0.0528353		0.172534	0.211602	0.233328		0.490976	0.412165	0.477363		0.0274885	0.0705369	0.0795272
129	0.568792	0.928703	0.617869		0.568137	0.580861	0.951162		0.0317033	0.0637716	0.0637857		0.567942	0.503571	0.540405		0.0371643	0.0760584	0.0245015		0.185907	0.181296	0.195816		0.429682	0.351753	0.537644		0.0641765	0.0246731	0.130036
130	0.533093	0.828499	0.746766		0.562178	0.728628	0.560037		0.0216976	0.0622296	0.104713		0.483496	0.493692	0.596673		0.0509453	0.0983439	0.0669344		0.137042	0.175623	0.116387		0.456372	0.565612	0.465057		0.0499924	0.0626774	0.0225849
131	0.487939	0.777515	0.803041		0.548437	0.609947	0.635946		0.0356984	0.0471571	0.09212		0.462126	0.575981	0.348119		0.0285881	0.0594939	0.094447		0.131469	0.114337	0.171367		0.436405	0.491974	0.429554		0.045411	0.0564593	0.108546
132	0.513338	0.779335	0.952836		0.553464	0.653396	0.691636		0.0429187	0.0636722	0.0421586		0.556564	0.537135	0.33252		0.0175193	0.0554645	0.0398322		0.218357	0.144829	0.243442		0.486261	0.477062	0.584047		0.0448246	0.0470578	0.0552994
133	0.489991	0.8088	0.791751		0.534434	0.625865	0.660116		0.0459973	0.0637716	0.00711759		0.500446	0.528092	0.524369		0.066962	0.0857088	0.0459914		0.223629	0.224103	0.0880715		0.497988	0.548192	0.323392		0.0599249	0.0374573	0.119222
134	0.576342	0.686249	0.847526		0.545792	0.615962	0.909745		0.0355884	0.0575039	0.0298396		0.502752	0.560454	0.378149		0.0461439	0.0819781	0.116074		0.114666	0.158611	0.100391		0.467729	0.571903	0.618847		0.0314101	0.0684477	0.0358622
135	0.496698	0.748987	0.457799		0.64325	0.699179	0.78394		0.0414893	0.0646173	0.0799376		0.562867	0.500592	0.358036		0.0194984	0.0627272	0.17548		0.186122	0.178246	0.177796		0.526482	0.506656	0.254676		0.0501756	0.057902	0.0870557
136	0.465325	0.750752	0.859656		0.501365	0.64619	0.840906		0.0197918	0.0902353	0		0.364727	0.519099	0.330483		0.0306037	0.0475055	0.0558469		0.129839	0.175442	0.218249		0.397291	0.611691	0.34343		0.0122049	0.0525793	0.124971
137	0.484419	0.775474	0.70818		0.55987	0.535286	0.907909		0.0349287	0.0828235	0.0251856		0.456053	0.514708	0.445356		0.0288445	0.128389	0.0756944		0.16486	0.229592	0.15371		0.533001	0.518889	0.404421		0.0792034	0.0855597	0.101702
138	0.528547	0.67698	0.723513		0.57119	0.598075	0.632833		0.0450078	0.0715813	0.013414		0.512209	0.569342	0.312408		0.0478299	0.0354675	0.0710404		0.2196	0.160622	0.22671		0.515372	0.490576	0.416024		0.0468037	0.0715815	0.0667973
139	0.482917	0.955297	0.828823		0.524231	0.523515	0.734183		0.0402432	0.0655624	0.0398322		0.56602	0.651004	0.355121		0.0541706	0.0475055	0.0965003		0.17892	0.196357	0.208871		0.534477	0.506889	0.493879		0.0325464	0.0454659	0.076379
140	0.54735	0.915901	0.932952		0.542777	0.565098	0.943107		0.029321	0.0495449	0.111557		0.499216	0.463943	0.437482		0.0305305	0.0962546	0.0726834		0.223543	0.161414	0.209425		0.594378	0.53194	0.400907		0.0818791	0.0397455	0.0472235
141	0.425301	0.770011	0.743396		0.557971	0.709445	0.560888		0.0410128	0.0725763	0.0896564		0.528428	0.470843	0.435733		0.0738523	0.061981	0.0677556		0.155731	0.183611	0.210713		0.430297	0.567825	0.481052		0.0321065	0.0526291	0.0461286
142	0.453963	0.818677	0.657296		0.516522	0.611037	0.64287		0.0261324	0.0575536	0.0636491		0.459204	0.537189	0.284998		0.0597416	0.0568076	0.0410637		0.166661	0.276913	0.155552		0.535544	0.629985	0.522882		0.0325464	0.0607375	0.0268285
143	0.390225	0.731386	0.853424		0.445021	0.692231	0.814754		0.0288079	0.0771527	0.0629645		0.449171	0.594854	0.406285		0.0784703	0.0850124	0.0792535		0.207683	0.186417	0.143233		0.524679	0.463839	0.391065		0.0523015	0.0602399	0.0190263
144	0.479692	0.827727	0.973727		0.534173	0.606162	0.515088		0.0473901	0.0463612	0.0654286		0.434489	0.511937	0.188494		0.0323997	0.0680498	0.0402425		0.165118	0.160014	0.241782		0.394422	0.576739	0.531672		0.0332061	0.0655624	0.0850024
145	0.438275	0.642273	0.57979		0.582474	0.507132	0.761605		0.0489294	0.0559617	0.075147		0.409889	0.43111	0.322608		0.0317766	0.0814807	0.0143723		0.218956	0.173488	0.181473		0.517257	0.571728	0.247291		0.0537675	0.0388998	0.0652915
146	0.437249	0.643376	0.753839		0.555141	0.538396	0.565836		0.0269387	0.056509	0.0295658		0.464432	0.50535	0.450892		0.0468037	0.0519328	0.084455		0.203567	0.181052	0.125394		0.477323	0.373948	0.255198		0.0557834	0.0432276	0.0197104
147	0.413976	0.758258	0.729578		0.408712	0.617985	0.637922		0.011875	0.0584987	0.0121819		0.462855	0.491495	0.523491		0.0203781	0.0575041	0.0714513		0.195767	0.160439	0.221926		0.525581	0.543124	0.479291		0.0186556	0.0842663	0.0451702
148	0.512898	0.797047	0.655274		0.535589	0.53036	0.880627		0.0384839	0.0671044	0.100059		0.504291	0.505768	0.328733		0.0722031	0.0816796	0.0654286		0.134468	0.212884	0.190669		0.502989	0.540561	0.490016		0.0248496	0.0537234	0.0825383
149	0.464482	0.715439	0.73531		0.594465	0.64842	0.730791		0.0328029	0.0516342	0.0349045		0.428839	0.528248	0.52539		0.0433219	0.0882458	0.0888352		0.200182	0.232458	0.081453		0.514429	0.513588	0.501793		0.0469503	0.0336767	0.10307
150	0.435821	0.615731	0.50211		0.527061	0.588482	0.636086		0.0384839	0.0727254	0.109504		0.454246	0.440834	0.441858		0.0515684	0.0683482	0.140986		0.215612	0.170137	0.223397		0.558873	0.622354	0.543971		0.0636267	0.0305925	0.0173834
151	0.373366	0.728847	0.936996		0.567131	0.825587	0.698566		0.0164565	0.0815301	0.0468126		0.501792	0.543462	0.343604		0.0400966	0.067602	0.0491396		0.15916	0.241055	0.204277		0.470189	0.473915	0.549246		0.0370545	0.0812815	0.0977324
152	0.51583	0.801076	0.756034		0.596812	0.637893	0.862815		0.0370179	0.101676	0.079801		0.422689	0.402355	0.323047		0.0438349	0.0983439	0.0639228		0.224614	0.240811	0.168418		0.556782	0.630975	0.525164		0.0542806	0.0262649	0.0340827
153	0.399096	0.815587	0.893692		0.544191	0.622079	0.658985		0.0529245	0.0720789	0.00602266		0.436719	0.488044	0.516206		0.0208912	0.0507887	0.0813068		0.206697	0.184039	0.158122		0.454856	0.635926	0.2951		0.0724963	0.0693928	0.0380526
154	0.409394	0.768521	0.859823		0.542999	0.770885	0.733763		0.0487463	0.0797395	0.0236803		0.390941	0.492489	0.33121		0.0629669	0.0626774	0.0620067		0.194737	0.149219	0.0746525		0.447598	0.638897	0.400378		0.0467672	0.0600908	0.0726834
155	0.292917	0.695409	0.775237		0.480213	0.664285	0.830025		0.0368711	0.045814	0.0149198		0.424074	0.513192	0.501191		0.042259	0.0836694	0.0476344		0.196195	0.246544	0.192321		0.43333	0.469431	0.364345		0.0765279	0.0295479	0.0893827
156	0.382456	0.68956	0.800012		0.509037	0.593718	0.506043		0.0268288	0.126797	0.0379155		0.4411	0.55235	0.538651		0.0459608	0.0669057	0.0165622		0.199838	0.249898	0.0935905		0.47474	0.554426	0.486327		0.0548671	0.0528779	0.0254593
157	0.442345	0.658329	0.535138		0.464944	0.549543	0.693477		0.0273785	0.0700892	0.0376418		0.45759	0.526941	0.270128		0.0448612	0.0811822	0.140986		0.264951	0.162146	0.178531		0.490362	0.63348	0.42393		0.0542806	0.0395465	0.0526987
158	0.425155	0.590349	0.612478		0.587204	0.588482	0.743654		0.0574326	0.074765	0.0459914		0.495719	0.308407	0.443607		0.0225405	0.078098	0.0421592		0.178448	0.220201	0.157387		0.535708	0.650141	0.517432		0.0331328	0.0943643	0.0777477
159	0.375272	0.657778	0.575406		0.497529	0.682536	0.643155		0.0392536	0.0839676	0.0975952		0.390326	0.438639	0.369259		0.073779	0.0653637	0.0845916		0.198638	0.19904	0.199311		0.580972	0.437332	0.402138		0.0597783	0.0610855	0.0383264
160	0.405803	0.548855	0.423589		0.48025	0.602947	0.687818		0.0482331	0.122171	0.0220374		0.381793	0.366439	0.334853		0.0549037	0.0869525	0.0807593		0.232117	0.238008	0.176514		0.522506	0.563282	0.467521		0.0530344	0.0651149	0.0993748
161	0.474781	0.626713	0.855946		0.504083	0.635094	0.810797		0.0122782	0.0789933	0.0483184		0.358039	0.541005	0.388211		0.0381906	0.0667067	0.0936258		0.287583	0.272156	0.308345		0.639766	0.525764	0.346068		0.0523748	0.0497439	0.124697
162	0.422187	0.600558	0.779788		0.505164	0.618658	0.756657		0.061904	0.0870518	0.136606		0.477654	0.459864	0.472471		0.0318133	0.0778492	0.0340833		0.182092	0.334905	0.164559		0.54034	0.675949	0.479291		0.0452277	0.0773518	0.0687134
163	0.329752	0.684042	0.481552		0.536893	0.704261	0.608803		0.0466937	0.0805353	0.00109493		0.409929	0.460283	0.525679		0.0490027	0.0708852	0.0569418		0.250806	0.242458	0.157576		0.490607	0.525413	0.649958		0.0367613	0.0442722	0.0648812
164	0.368272	0.514093	0.454089		0.473248	0.709652	0.691356		0.0265355	0.0529274	0.0306608		0.453324	0.401206	0.458039		0.0408662	0.0902854	0.0599534		0.169148	0.251118	0.121535		0.518036	0.56101	0.446425		0.0601082	0.0770036	0.0943104
165	0.366073	0.47729	0.579449		0.465317	0.583608	0.591982		0.0318501	0.0263642	0.0488659		0.411774	0.472413	0.361384		0.0720198	0.0420835	0.133868		0.255263	0.122265	0.081271		0.571828	0.462498	0.29668		0.0612444	0.0604887	0.0607746
166	0.361565	0.520716	0.561421		0.529482	0.547159	0.634675		0.0375675	0.0663583	0.0722725		0.418769	0.538808	0.37655		0.0494425	0.0483512	0.0318928		0.191695	0.23441	0.23884		0.544974	0.455799	0.764027		0.0299075	0.0568574	0.047771
167	0.345145	0.602103	0.550972		0.519091	0.586926	0.649939		0.0758681	0.104114	0.0143723		0.383829	0.452388	0.380631		0.0396934	0.0638713	0.0858236		0.204168	0.200931	0.215126		0.489214	0.459409	0.475602		0.105189	0.0569569	0.0429804
168	0.340417	0.662854	0.538001		0.500174	0.52108	0.686268		0.0339758	0.048152	0.0469498		0.322408	0.365078	0.358908		0.0601448	0.0544698	0.0569418		0.182778	0.211664	0.233139		0.544399	0.501705	0.451172		0.0323265	0.0645677	0.101154
169	0.381759	0.627817	0.726882		0.516	0.597711	0.589295		0.0389237	0.0837687	0.0885615		0.382907	0.507023	0.292723		0.0629669	0.0746657	0.0687134		0.175449	0.252581	0.170995		0.457315	0.560311	0.481929		0.0605114	0.0271104	0.0839075
170	0.308347	0.686304	0.614326		0.482448	0.634109	0.553678		0.0421124	0.0632244	0.0245015		0.349506	0.503989	0.450748		0.0412327	0.0640703	0.0839075		0.12731	0.23447	0.199865		0.482736	0.570854	0.472964		0.0358083	0.0651149	0.134005
171	0.338511	0.62009	0.651398		0.505238	0.598334	0.746906		0.0430652	0.087002	0.0841812		0.407929	0.469067	0.188783		0.0481965	0.0665078	0.046676		0.194781	0.22703	0.266603		0.566909	0.673211	0.296151		0.0502489	0.0562604	0.0210796
172	0.325683	0.51757	0.567152		0.543484	0.626175	0.44625		0.0304206	0.0982442	0.0691243		0.330211	0.448364	0.246805		0.0632601	0.0909817	0.074052		0.222514	0.281424	0.0899136		0.507376	0.638897	0.49406		0.0503222	0.0895888	0.0269651
173	0.30677	0.537104	0.431176		0.556667	0.496659	0.683861		0.0369812	0.0581008	0.0106767		0.276015	0.457407	0.46081		0.0203414	0.07576	0.119633		0.24579	0.200382	0.211259		0.512297	0.621247	0.319355		0.0380442	0.0605383	0.0272388
174	0.276608	0.535723	0.565631		0.466099	0.676366	0.731782		0.0282216	0.0696414	0.0776111		0.455706	0.341918	0.446378		0.0610976	0.0573548	0.03203		0.191737	0.266911	0.249325		0.596921	0.505666	0.593185		0.0380807	0.0725765	0.0188892
175	0.429297	0.546594	0.756368		0.448632	0.594911	0.540675		0.0664488	0.0495449	0.0978689		0.430838	0.451291	0.465036		0.0472435	0.0412875	0.113747		0.256207	0.311245	0.202435		0.512502	0.603478	0.726763		0.049516	0.0788939	0.081033
176	0.30076	0.516079	0.533617		0.470382	0.632086	0.563854		0.0262057	0.100731	0.0510563		0.310224	0.454585	0.327712		0.0539874	0.0597923	0.0841812		0.28677	0.248556	0.168418		0.474987	0.625032	0.459782		0.0484164	0.0713327	0.0735046
177	0.301676	0.482862	0.748621		0.472802	0.625138	0.670578		0.0176293	0.0479531	0.054752		0.413964	0.380869	0.417802		0.0333893	0.103816	0.114705		0.258307	0.304415	0.12503		0.541571	0.596779	0.725531		0.0538774	0.0782471	0.0368206
178	0.256742	0.569106	0.576587		0.489299	0.580239	0.76839		0.0335726	0.0697905	0.0591322		0.362729	0.424104	0.428297		0.0547937	0.083371	0.081033		0.178149	0.239104	0.150769		0.531321	0.450555	0.494763		0.0407562	0.0592947	0.0242278
179	0.305818	0.564913	0.390568		0.418171	0.588275	0.632553		0.100425	0.0986919	0.104439		0.383829	0.419294	0.385879		0.0418191	0.0888925	0.117306		0.283854	0.268193	0.126683		0.637756	0.600915	0.715515		0.0531444	0.0423819	0.0609112
180	0.231416	0.533241	0.448531		0.555885	0.562661	0.856736		0.0186922	0.0618315	0.0889718		0.322215	0.382542	0.354099		0.0354418	0.0766057	0.0852762		0.31026	0.193674	0.395128		0.476545	0.640355	0.277525		0.0305672	0.0365618	0.0328512
181	0.285989	0.510453	0.645666		0.545272	0.692958	0.471411		0.0304573	0.053226	0.0659761		0.25941	0.463943	0.275231		0.0383739	0.0754616	0.036684		0.231173	0.331063	0.223761		0.544235	0.633889	0.334995		0.0688678	0.0580015	0.108409
182	0.218992	0.634107	0.602703		0.507696	0.519833	0.714535		0.0398767	0.0809831	0.264042		0.374873	0.457198	0.258178		0.0634068	0.0784959	0.104576		0.294485	0.298011	0.30761		0.577241	0.680434	0.373839		0.0637	0.0467095	0.0915726
183	0.223646	0.552002	0.654093		0.50494	0.604399	0.54025		0.0496991	0.0525295	0.0799376		0.4647	0.488568	0.353955		0.046877	0.0695918	0.0748732		0.175578	0.272644	0.162353		0.628778	0.640937	0.398624		0.0571394	0.0362633	0.0318928
184	0.258648	0.496327	0.375908		0.477382	0.557113	0.833697		0.0492961	0.0714322	0.0911622		0.335246	0.381233	0.28908		0.0376775	0.0605385	0.0333986		0.274981	0.243801	0.17725		0.576666	0.658123	0.456448		0.043615	0.057106	0.0412008
185	0.279026	0.617663	0.555355		0.442973	0.50822	0.735739		0.0290278	0.0806845	0.130994		0.333209	0.504931	0.338207		0.0366513	0.0947124	0.045444		0.297658	0.319173	0.180002		0.579701	0.545396	0.370672		0.029431	0.0619312	0.0354519
186	0.262094	0.410911	0.566645		0.451575	0.505834	0.758213		0.0318501	0.0447197	0.0724096		0.394093	0.381757	0.354682		0.0399133	0.0662091	0.0707667		0.281625	0.317159	0.107009		0.534027	0.609712	0.369969		0.0383006	0.0719298	0.0688506
187	0.207775	0.576389	0.481052		0.522517	0.520509	0.633119		0.0382273	0.0674029	0.0633754		0.341127	0.384527	0.362845		0.0332794	0.0529774	0.0776111		0.282398	0.326306	0.228545		0.600037	0.57732	0.486501		0.0686479	0.0342736	0.0277863
188	0.206677	0.394909	0.530588		0.481144	0.584386	0.633824		0.0503955	0.0802865	0.0472235		0.29727	0.402773	0.380487		0.0528878	0.0460132	0.120591		0.239017	0.243374	0.188645		0.468304	0.513879	0.53589		0.0320332	0.0280059	0.0852762
189	0.315641	0.576005	0.452908		0.51682	0.436565	0.872852		0.0303473	0.0878477	0.0620067		0.344817	0.356087	0.392292		0.0494792	0.0370095	0.0781586		0.272024	0.222092	0.162535		0.690647	0.704786	0.517787		0.0165665	0.0298962	0.0807593
190	0.281738	0.417256	0.513066		0.495407	0.546018	0.449356		0.04761	0.0871015	0.0563944		0.312952	0.362675	0.3643		0.0551968	0.0632744	0.0646074		0.217199	0.349966	0.181844		0.586015	0.678222	0.339741		0.0576159	0.0631251	0.0131403
191	0.249522	0.48645	0.644151		0.546427	0.613784	0.689234		0.0609878	0.0692435	0.13907		0.366572	0.387769	0.292139		0.0394002	0.0215889	0.0418849		0.316647	0.271912	0.271015		0.495282	0.594098	0.620782		0.0572494	0.0560614	0.0357256
192	0.159689	0.495332	0.553501		0.460811	0.595792	0.718493		0.0156501	0.0764563	0.0223111		0.308417	0.522968	0.225232		0.0574326	0.0778492	0.0290184		0.206954	0.264228	0.192875		0.553994	0.617985	0.599164		0.0400966	0.0378053	0.0930784
193	0.229291	0.457039	0.554682		0.421262	0.44455	0.666335		0.0225405	0.0389494	0.0588585		0.319025	0.353317	0.173479		0.0565896	0.0410389	0.0750104		0.291871	0.243434	0.250606		0.519964	0.60202	0.489487		0.0528878	0.0226833	0.107998
194	0.232845	0.510837	0.423589		0.442153	0.554366	0.751854		0.0286979	0.0688454	0.0940367		0.26852	0.376163	0.271877		0.0662656	0.0647666	0.0121819		0.289727	0.353504	0.330224		0.48618	0.65993	0.624123		0.0525214	0.065065	0.0286075
195	0.333123	0.427244	0.566979		0.44569	0.5413	0.728529		0.0481965	0.0827739	0.050098		0.31964	0.449931	0.396085		0.0179958	0.0322342	0.0906142		0.254192	0.29167	0.183868		0.469041	0.711195	0.736075		0.0321065	0.043725	0.00383226
196	0.256082	0.414662	0.351141		0.400072	0.560536	0.68994		0.0378974	0.0646669	0.108683		0.233235	0.35206	0.388211		0.0424789	0.0782473	0.0892456		0.341551	0.356491	0.269362		0.582325	0.618566	0.44836		0.0205981	0.0410389	0.0548886
197	0.231379	0.42923	0.554682		0.495816	0.571788	0.566401		0.0241899	0.0822763	0.085139		0.312722	0.331723	0.223189		0.0535109	0.0709348	0.103892		0.309574	0.353625	0.182579		0.634683	0.56567	0.53747		0.023017	0.0576533	0.0405162
198	0.18956	0.461344	0.590065		0.422417	0.679735	0.757788		0.0532177	0.0937673	0.0225849		0.343741	0.408473	0.606585		0.0643231	0.0426307	0.0442119		0.327835	0.348563	0.264768		0.613853	0.626315	0.504075		0.081146	0.0771031	0.0473601
199	0.222767	0.345912	0.53008		0.446398	0.622598	0.583502		0.0559299	0.0745661	0.0584476		0.296463	0.348714	0.383108		0.0299074	0.058101	0.00971833		0.35484	0.396068	0.28407		0.586916	0.615246	0.456448		0.0263523	0.0543701	0.018068
200	0.244574	0.358546	0.300757		0.587912	0.457876	0.811788		0.0319599	0.121823	0.0479081		0.317142	0.370621	0.288208		0.0336459	0.0447199	0.0925309		0.28857	0.346919	0.244177		0.637428	0.668551	0.444671		0.0499192	0.0455654	0.0332615
201	0.24362	0.443686	0.518457		0.400109	0.507391	0.562298		0.0304206	0.107546	0.0184789		0.271018	0.282946	0.419407		0.0560398	0.0633241	0.112515		0.2184	0.249715	0.214572		0.708646	0.589847	0.537644		0.0646895	0.0449685	0.124697
202	0.212723	0.333164	0.38922		0.355122	0.615806	0.559332		0.0385938	0.153609	0.00711759		0.28424	0.297846	0.397978		0.030274	0.0549173	0.0674819		0.266109	0.309658	0.33776		0.574781	0.78821	0.571393		0.0402066	0.0603892	0.082128
203	0.174607	0.360864	0.60321		0.424985	0.515478	0.794827		0.0346721	0.0292991	0.0550257		0.248572	0.345317	0.329022		0.0588986	0.0519328	0.0535199		0.281411	0.445463	0.193057		0.554158	0.764615	0.700572		0.0484897	0.0763072	0.0958157
204	0.226504	0.401585	0.372372		0.404764	0.583608	0.561028		0.0281116	0.103716	0.0599534		0.230007	0.431842	0.280478		0.0538774	0.0489979	0.113063		0.281841	0.388203	0.235163		0.648457	0.57132	0.553993		0.0246664	0.0587973	0.0517404
205	0.172774	0.285049	0.434712		0.406217	0.4782	0.609514		0.0641397	0.0657116	0.0877398		0.239999	0.342181	0.223772		0.0521182	0.0852612	0.119222		0.299372	0.429731	0.180191		0.641979	0.630391	0.370324		0.0370912	0.0745164	0.0565315
206	0.234347	0.321963	0.477682		0.471312	0.465861	0.381083		0.0685013	0.0460628	0.0479081		0.24734	0.252937	0.208757		0.0445313	0.0928223	0.0848653		0.386388	0.281731	0.313857		0.633984	0.557455	0.449237		0.0503956	0.0879473	0.0435278
207	0.121975	0.338019	0.391408		0.429156	0.50651	0.602304		0.0459241	0.101527	0.0871923		0.269365	0.428861	0.217064		0.0144406	0.0762576	0.166994		0.290885	0.323867	0.265867		0.520907	0.53089	0.386492		0.0167496	0.0684973	0.0410637
208	0.220604	0.369528	0.433031		0.428523	0.521856	0.666335		0.0597416	0.102472	0.0770631		0.276361	0.308144	0.28019		0.062014	0.0507389	0.0721359		0.264051	0.353625	0.245277		0.647801	0.656783	0.464702		0.0775175	0.0432772	0.0465389
209	0.172554	0.471332	0.398995		0.500584	0.636909	0.428438		0.0304206	0.0478536	0.0255965		0.22497	0.240179	0.356137		0.0509453	0.0721786	0.110189		0.293842	0.262644	0.384643		0.573427	0.520638	0.512866		0.0666321	0.0525296	0.0584476
210	0.167276	0.438777	0.309185		0.459917	0.611088	0.704219		0.0330595	0.0887432	0.101702		0.224395	0.261667	0.483988		0.0154669	0.0463116	0.189852		0.332636	0.341003	0.16493		0.55264	0.520112	0.514446		0.0538041	0.04661	0.114158
211	0.14426	0.267171	0.242801		0.396162	0.562298	0.449502		0.027965	0.0414864	0.0557098		0.245881	0.299937	0.268673		0.0448978	0.0846145	0.112926		0.305845	0.27246	0.175044		0.569451	0.690398	0.522534		0.0742922	0.0417352	0.133458
212	0.191613	0.338406	0.283069		0.43329	0.572098	0.696444		0.0363215	0.0651645	0.0748732		0.234119	0.431267	0.391998		0.0465837	0.100632	0.0425695		0.257706	0.313196	0.338867		0.611762	0.613322	0.611288		0.043212	0.0737206	0.0520141
213	0.129232	0.296307	0.349626		0.41724	0.541248	0.596651		0.0461074	0.0575039	0.0822646		0.243613	0.328692	0.243451		0.0525214	0.102224	0.0555732		0.311974	0.306367	0.260356		0.548541	0.57604	0.568755		0.0184723	0.0489979	0.121139
214	0.176806	0.389447	0.367655		0.369796	0.505939	0.644991		0.0287712	0.0566084	0.0265548		0.207674	0.289062	0.216775		0.0622339	0.0766057	0.0741886		0.333793	0.335881	0.202806		0.59073	0.531414	0.482806		0.0643963	0.0209422	0.0351782
215	0.184906	0.286594	0.204215		0.375568	0.627212	0.478055		0.0584954	0.0578024	0.125108		0.229236	0.293768	0.313718		0.0260957	0.0770534	0.0359994		0.334607	0.372103	0.320846		0.677773	0.601787	0.935036		0.0516784	0.0591456	0.0217637
216	0.145065	0.305134	0.203708		0.417389	0.523205	0.612906		0.0372743	0.071084	0.0691243		0.240269	0.348924	0.181059		0.0428086	0.061185	0.0966374		0.334092	0.413327	0.321211		0.493478	0.658063	0.574031		0.0516784	0.0539225	0.0806222
217	0.12773	0.3053	0.372032		0.415043	0.43698	0.506183		0.0452644	0.0492961	0.0598163		0.215746	0.314838	0.163273		0.0212578	0.0538231	0.124287		0.342109	0.406007	0.284805		0.515372	0.6435	0.555044		0.0556733	0.0564593	0.111694
218	0.127509	0.283614	0.17102		0.412697	0.601754	0.528517		0.0465839	0.0782471	0.0310717		0.248648	0.308929	0.327712		0.0504322	0.0765062	0.0825383		0.351924	0.240203	0.339966		0.648868	0.542543	0.388427		0.0544272	0.0569569	0.0555732
219	0.119226	0.262261	0.318786		0.385288	0.494583	0.640328		0.0279283	0.0457644	0.0498242		0.220935	0.350806	0.146508		0.0752085	0.0737206	0.0479081		0.301986	0.386739	0.257596		0.475683	0.616354	0.509873		0.0595217	0.0365121	0.0568052
220	0.17545	0.248246	0.31525		0.527173	0.571632	0.558201		0.0436883	0.0622793	0.0854128		0.242075	0.259734	0.307738		0.053181	0.0694923	0.0782952		0.317204	0.297828	0.0808997		0.661126	0.608895	0.413915		0.0436518	0.0738697	0.126066
221	0.171418	0.307782	0.329742		0.420219	0.622598	0.606542		0.0313368	0.122072	0.0542045		0.245228	0.293662	0.399145		0.0202315	0.0973987	0.0425695		0.361313	0.398874	0.294919		0.634148	0.630218	0.771404		0.0428454	0.0635727	0.053657
222	0.103686	0.218726	0.370517		0.412883	0.611554	0.700262		0.0452277	0.082724	0.0605009		0.273669	0.266007	0.3057		0.044458	0.052679	0.0860974		0.318533	0.36814	0.277087		0.58909	0.564505	0.298086		0.0473535	0.0252203	0.0251856
223	0.131029	0.215414	0.319967		0.416047	0.592266	0.458827		0.0635534	0.0673034	0.0136877		0.273901	0.372973	0.221001		0.0454843	0.090534	0.0958157		0.333664	0.438327	0.318269		0.643293	0.760072	0.393174		0.0287714	0.0473562	0.062417
224	0.149573	0.296416	0.360242		0.482001	0.567899	0.796098		0.0396567	0.0781477	0.0632382		0.184304	0.23401	0.315756		0.0387038	0.101428	0.0836338		0.396376	0.387408	0.234981		0.545548	0.674318	0.416546		0.0499192	0.0516342	0.00889713
225	0.158774	0.281518	0.308004		0.370802	0.490435	0.57997		0.0621606	0.0797892	0.0492768		0.24615	0.312641	0.271733		0.0291377	0.0745164	0.0778848		0.408165	0.351249	0.113075		0.567605	0.54831	0.324979		0.0407197	0.0738201	0.116895
226	0.115194	0.198143	0.302105		0.413702	0.563698	0.461939		0.0627837	0.0639208	0.138522		0.189148	0.270189	0.149574		0.0458508	0.0830725	0.0759682		0.307303	0.427289	0.303561		0.624801	0.707815	0.520244		0.0476834	0.0581506	0.0609112
227	0.113362	0.291174	0.294359		0.356463	0.609117	0.549721		0.0506154	0.0588966	0.089109		0.208904	0.295492	0.158025		0.0560031	0.0681991	0.069398		0.459432	0.340575	0.17725		0.603276	0.47747	0.503373		0.0291011	0.10874	0.103618
228	0.129049	0.215855	0.31188		0.371918	0.554261	0.572195		0.0152836	0.037855	0.0748732		0.200717	0.41046	0.214882		0.0449711	0.0528779	0.046676		0.385016	0.244166	0.376925		0.542678	0.685502	0.397566		0.0431387	0.0917279	0.0748732
229	0.110577	0.222808	0.234541		0.432396	0.494636	0.696304		0.0544272	0.0873999	0.0698089		0.224663	0.292043	0.306427		0.0418191	0.0700892	0.0999222		0.327963	0.455646	0.159782		0.629024	0.662027	0.481226		0.0696375	0.0359649	0.0276497
230	0.121389	0.247969	0.421908		0.419772	0.49277	0.592408		0.0420757	0.0605383	0.0747366		0.243497	0.226376	0.191554		0.0392169	0.119286	0.0245015		0.309574	0.351857	0.345485		0.600692	0.727332	0.567175		0.0316667	0.0501916	0.0683031
231	0.111419	0.330461	0.203875		0.356389	0.409966	0.79214		0.0446779	0.0852112	0.086782		0.240961	0.295389	0.33121		0.0431385	0.0958567	0.043117		0.427368	0.358322	0.305214		0.663424	0.699833	0.432018		0.0329129	0.0688954	0.052425
232	0.150087	0.215359	0.124513		0.354788	0.483229	0.472681		0.0503589	0.0682984	0.0791164		0.178962	0.299205	0.275958		0.0603647	0.0528779	0.0710404		0.310689	0.529127	0.291424		0.480686	0.728497	0.37489		0.0675483	0.0630257	0.0346307
233	0.146384	0.172982	0.306656		0.396311	0.529738	0.514383		0.0317033	0.0531265	0.110189		0.184612	0.227213	0.186601		0.0679148	0.049346	0.096774		0.40452	0.533092	0.321582		0.617748	0.684513	0.547666		0.0448612	0.0490974	0.0685768
234	0.135976	0.192296	0.302105		0.392475	0.457668	0.654177		0.0337192	0.0547182	0.0357256		0.18096	0.224494	0.333542		0.0383006	0.0814807	0.0542045		0.272496	0.442169	0.349162		0.640914	0.715913	0.500561		0.0606946	0.0490475	0.0086234
235	0.133154	0.190585	0.194947		0.324288	0.487791	0.561308		0.0613909	0.0817789	0.0318928		0.163587	0.212836	0.197967		0.04761	0.0690944	0.0709038		0.346995	0.435644	0.296207		0.618447	0.630624	0.438867		0.0509087	0.0202458	0.0461286
236	0.0991416	0.176513	0.30767		0.399253	0.454143	0.607532		0.0446779	0.097299	0.0800747		0.228238	0.286186	0.15832		0.0398765	0.0924741	0.0803484		0.311845	0.452292	0.350262		0.564981	0.635577	0.311442		0.0675118	0.0355172	0.0761053
237	0.10823	0.237044	0.192758		0.398135	0.458964	0.407234		0.0174827	0.0466597	0.0587214		0.229545	0.220888	0.234994		0.0470236	0.0744668	0.0858236		0.302672	0.403264	0.152793		0.641775	0.651249	0.679657		0.0745121	0.0492465	0.064744
238	0.122892	0.128178	0.298909		0.372328	0.370768	0.500389		0.0404996	0.0599911	0.0328512		0.181807	0.24227	0.296954		0.0243731	0.0647666	0.107862		0.453215	0.519676	0.17026		0.525745	0.512423	0.562958		0.0492961	0.0469583	0.0529724
239	0.0881096	0.256908	0.240946		0.423868	0.54441	0.497417		0.0416725	0.0639208	0.0673448		0.194875	0.255185	0.218524		0.0351486	0.0628267	0.118675		0.42381	0.335209	0.243442		0.675394	0.593109	0.486849		0.0467672	0.0692435	0.0433907
240	0.112447	0.131158	0.167984		0.446845	0.428373	0.586614		0.038154	0.0894891	0.0684397		0.195528	0.281429	0.226248		0.0340856	0.0524302	0.0873294		0.360841	0.378505	0.334455		0.631237	0.593166	0.343256		0.042369	0.0518333	0.0309345
241	0.123039	0.202393	0.229316		0.366444	0.478562	0.614602		0.0382639	0.0750138	0.0225849		0.196758	0.224443	0.17625		0.0569928	0.0583994	0.109915		0.367699	0.359237	0.322499		0.695732	0.560601	0.493357		0.0361016	0.0237279	0.00588553
242	0.120583	0.176072	0.271272		0.354788	0.47177	0.424341		0.0368711	0.128289	0.115664		0.214592	0.196891	0.241997		0.044458	0.067602	0.1132		0.387717	0.510589	0.315517		0.635379	0.600274	0.546782		0.0329129	0.0341245	0.0416112
243	0.0732285	0.132869	0.146085		0.373519	0.426973	0.3678		0.0636632	0.0784461	0.0542045		0.19818	0.211373	0.141261		0.0256925	0.11466	0.0756944		0.484337	0.319537	0.381155		0.556699	0.632606	0.555044		0.0590452	0.0337762	0.0815805
244	0.110539	0.18573	0.223084		0.358699	0.468971	0.819137		0.0407562	0.0876985	0.0166993		0.142716	0.206249	0.146947		0.0686845	0.0811324	0.0830863		0.410008	0.398142	0.254101		0.614509	0.725934	0.545557		0.0560398	0.0733723	0.0433907
245	0.0936075	0.172707	0.117941		0.40212	0.55675	0.371757		0.0251062	0.0897878	0.0388738		0.14606	0.263079	0.177999		0.035735	0.078098	0.0438016		0.453258	0.421375	0.234064		0.705243	0.639771	0.5619		0.0492961	0.0587973	0.0869186
246	0.0787627	0.205041	0.120977		0.399029	0.513561	0.584207		0.0347454	0.077302	0.0592688		0.141333	0.213306	0.188055		0.0383372	0.0513357	0.0175205		0.447772	0.561631	0.176514		0.581956	0.621713	0.39774		0.034489	0.0932699	0.064744
247	0.0992882	0.14578	0.152317		0.451911	0.42495	0.401866		0.0258391	0.0616824	0.0952682		0.178808	0.161026	0.403082		0.065056	0.0721786	0.142081		0.566423	0.469305	0.267709		0.704382	0.628645	0.388253		0.0485264	0.0393972	0.0528353
248	0.125971	0.148538	0.179107		0.35814	0.466741	0.574736		0.0159067	0.0922749	0.0566681		0.208098	0.195166	0.355848		0.0577625	0.0729246	0.0369577		0.337908	0.445219	0.302826		0.492903	0.622645	0.673859		0.0479766	0.0387008	0.0676185
249	0.0624897	0.195219	0.162933		0.472877	0.598904	0.423915		0.0180324	0.0769041	0.0718616		0.172581	0.221933	0.226248		0.0329495	0.0475055	0.0852762		0.509283	0.39424	0.286647		0.632468	0.662084	0.693368		0.048563	0.0459137	0.0699455
250	0.0557102	0.105997	0.231845		0.441557	0.503658	0.54138		0.0419657	0.032035	0.0251856		0.0993212	0.229985	0.29229		0.0352585	0.0415859	0.156317		0.480906	0.420704	0.266974		0.683103	0.617168	0.506184		0.0448612	0.0268618	0.0495505
251	0.0995074	0.183466	0.238077		0.38134	0.446261	0.620535		0.0443481	0.0695419	0.0375052		0.193799	0.25257	0.182081		0.0573593	0.0784463	0.0862345		0.381331	0.508212	0.196923		0.718323	0.581689	0.721842		0.0297242	0.0471076	0.0376418
252	0.0892083	0.131654	0.261837		0.428784	0.40727	0.558481		0.0417092	0.0705367	0.105397		0.158322	0.324038	0.285726		0.0345988	0.0782473	0.0993748		0.49158	0.441865	0.157576		0.625006	0.64146	0.475428		0.0416359	0.110979	0.0639228
253	0.0781763	0.139214	0.223251		0.432769	0.436721	0.436213		0.0336826	0.0457644	0.0945842		0.174312	0.289377	0.214149		0.0537308	0.0505399	0.0344936		0.425783	0.448146	0.227991		0.510862	0.791179	0.409168		0.0234935	0.025071	0.0422958
254	0.0664113	0.129115	0.20202		0.402604	0.373569	0.509575		0.0288445	0.0409888	0.0568052		0.19795	0.227737	0.346808		0.0420757	0.0614338	0.141808		0.422181	0.551996	0.295836		0.644562	0.796714	0.632377		0.0320332	0.0524798	0.0258702
255	0.0766378	0.151077	0.214831		0.358028	0.471201	0.51862		0.0385205	0.0683979	0.137427		0.16943	0.135878	0.302929		0.0363947	0.0848631	0.0625542		0.475378	0.40729	0.130731		0.604792	0.670297	0.455564		0.0380807	0.0858083	0.0428432
256	0.0983724	0.154167	0.130578		0.391135	0.4768	0.496852		0.0205247	0.041934	0.018068		0.191184	0.136244	0.31459		0.0418558	0.0513357	0.0380526		0.523601	0.523334	0.22229		0.56982	0.6181	0.564183		0.0509087	0.0484507	0.0262811
257	0.0385562	0.106493	0.257454		0.354006	0.507391	0.445964		0.0305306	0.108093	0.0511929		0.100782	0.222143	0.0814949		0.0212578	0.0456152	0.0811696		0.449315	0.450097	0.176325		0.60262	0.684164	0.547666		0.0786171	0.0734718	0.0596797
258	0.101121	0.140206	0.19023		0.312073	0.459327	0.492189		0.0231636	0.0708352	0.0722725		0.151942	0.208236	0.218086		0.0549402	0.0826744	0.0666607		0.572381	0.443449	0.248589		0.602988	0.676473	0.419887		0.0273786	0.0526788	0.052425
259	0.0819891	0.14247	0.207244		0.331439	0.490333	0.669447		0.0337925	0.111924	0.10704		0.139065	0.167718	0.200883		0.0314101	0.0553651	0.0223111		0.474006	0.451561	0.230015		0.645054	0.600156	0.467166		0.067072	0.065264	0.023406
260	0.094413	0.0748207	0.209606		0.35259	0.441128	0.291465		0.0448979	0.0526289	0.0516038		0.190531	0.184552	0.289374		0.0673284	0.0597425	0.103344		0.64431	0.343442	0.389245		0.664529	0.60744	0.610411		0.0393635	0.0520323	0.0543411
261	0.0590078	0.10263	0.148781		0.37203	0.541092	0.338681		0.0341224	0.0585982	0.0516038		0.166548	0.103098	0.193597		0.0477566	0.0530769	0.0876032		0.523815	0.397471	0.255208		0.541119	0.656199	0.401609		0.0384839	0.0509876	0.0739149
262	0.0593009	0.140538	0.139172		0.393629	0.363822	0.499964		0.0480132	0.0818784	0.0125928		0.131071	0.191818	0.27698		0.0513851	0.0799385	0.045444		0.454974	0.521199	0.254654		0.673837	0.619849	0.5684		0.0398034	0.083719	0.102523
263	0.0568089	0.104231	0.188375		0.328123	0.478096	0.566967		0.0421124	0.0707855	0.0288818		0.161012	0.227213	0.301324		0.041306	0.0780484	0.0657024		0.459131	0.44406	0.229098		0.529025	0.648976	0.655401		0.0453011	0.0584491	0.0542045
264	0.0425156	0.112727	0.177759		0.339296	0.358118	0.651915		0.0547571	0.0789933	0.0659761		0.199104	0.200497	0.267651		0.0459973	0.0878977	0.0714513		0.464617	0.513699	0.284805		0.602579	0.570448	0.558559		0.0290278	0.0477045	0.103618
265	0.0593387	0.11201	0.236229		0.319187	0.476695	0.335994		0.0432118	0.0352185	0.0569418		0.141678	0.189206	0.13543		0.0505055	0.0882458	0.0876032		0.431525	0.47022	0.298414		0.615863	0.74271	0.558211		0.0520083	0.061981	0.0525616
266	0.0295779	0.0462926	0.16344		0.31885	0.470008	0.425471		0.0262423	0.0457145	0.0288818		0.200256	0.175717	0.141405		0.062747	0.0538727	0.0438016		0.469676	0.515102	0.184232		0.665268	0.764557	0.443084		0.0517517	0.0523307	0.0169731
267	0.0697466	0.108975	0.14844		0.346186	0.444031	0.470985		0.0258391	0.053425	0.0502346		0.176887	0.202118	0.222606		0.0462905	0.0636225	0.029703		0.540104	0.540957	0.283706		0.638535	0.651424	0.66296		0.0632968	0.0177587	0.0421586
268	0.0522283	0.119901	0.147433		0.290846	0.459637	0.514098		0.0612809	0.0790928	0.0539308		0.119769	0.177757	0.256279		0.0348553	0.0347213	0.0985536		0.582026	0.475709	0.349162		0.670558	0.646646	0.487552		0.018399	0.112919	0.0507826
269	0.0492588	0.132095	0.0894699		0.313005	0.466275	0.382073		0.0179591	0.057305	0.0377789		0.173889	0.0727225	0.227565		0.0671086	0.0533255	0.0662498		0.54559	0.588278	0.353575		0.744726	0.771489	0.559791		0.0700407	0.0629262	0.120728
270	0.0551601	0.0685845	0.262004		0.290548	0.365428	0.551842		0.00963927	0.0742676	0.0752841		0.14583	0.221306	0.189077		0.044348	0.0657616	0.0526987		0.479234	0.46583	0.301908		0.663792	0.705427	0.519367		0.0797167	0.065264	0.0695352
271	0.0389597	0.110577	0.166976		0.33129	0.47851	0.483423		0.0315567	0.0841169	0.0550257		0.129032	0.133578	0.170269		0.0350753	0.0634734	0.0596797		0.370486	0.5684	0.303379		0.632713	0.687542	0.621659		0.0570661	0.0536737	0.0747361
272	0.0451905	0.092146	0.0830644		0.311403	0.469281	0.624213		0.0438349	0.0424316	0.114021		0.119194	0.241173	0.201616		0.0496258	0.0603892	0.0888352		0.521971	0.420216	0.331142		0.570148	0.686843	0.537296		0.0429187	0.0509378	0
273	0.0832721	0.0957338	0.218027		0.352256	0.386687	0.452468		0.0304573	0.0655126	0.0562578		0.164048	0.169651	0.171147		0.0615741	0.0429788	0.0659761		0.440999	0.541506	0.479522		0.489214	0.730652	0.41743		0.0558199	0.0529276	0.071725
274	0.0513851	0.0803379	0.139846		0.364508	0.397056	0.465757		0.0287712	0.0730241	0.06406		0.204714	0.269665	0.146803		0.0368346	0.0440234	0.0370943		0.491152	0.461804	0.313121		0.661126	0.687133	0.371201		0.0931677	0.0376562	0.0195738
275	0.0497726	0.0926988	0.140861		0.303583	0.417692	0.630997		0.0245564	0.0617819	0.0147827		0.124421	0.13039	0.244762		0.0221373	0.0786949	0.138112		0.5266	0.45589	0.283524		0.651779	0.597187	0.630449		0.0443481	0.0991397	0.0229957
276	0.0907482	0.0563351	0.176244		0.316951	0.386428	0.570359		0.020708	0.0586977	0.00643299		0.129571	0.129344	0.100153		0.0480132	0.0571559	0.116348		0.495995	0.642247	0.373612		0.587778	0.67187	0.50443		0.0512019	0.0541215	0.0240907
277	0.0611703	0.0589287	0.116767		0.375009	0.517345	0.503216		0.0257292	0.0576531	0.00848626		0.118232	0.177548	0.228436		0.0556733	0.0592451	0.025049		0.456644	0.538335	0.28407		0.635912	0.652063	0.733618		0.0418558	0.0192012	0.0128665
278	0.0462529	0.0631219	0.144737		0.250888	0.452587	0.398049		0.0320699	0.0428295	0.0506454		0.09786	0.154178	0.251764		0.0436516	0.0924741	0.0848653		0.527974	0.590353	0.310551		0.702947	0.702514	0.554522		0.0251795	0.0371588	0.0555732
279	0.0473168	0.0536868	0.0737965		0.286936	0.336498	0.459393		0.0347822	0.084465	0.0576264		0.112889	0.179063	0.185723		0.0392535	0.0588472	0.05133		0.442671	0.634503	0.247483		0.745424	0.671637	0.551355		0.0623439	0.0486993	0.0335352
280	0.0522283	0.0813321	0.179947		0.394337	0.411678	0.440031		0.0533276	0.0383027	0.0622804		0.0911339	0.136402	0.2108		0.0300174	0.0697411	0.0654286		0.550648	0.517601	0.315881		0.711148	0.729371	0.431489		0.0214411	0.0385019	0.0782952
281	0.060584	0.0963391	0.100252		0.311179	0.331573	0.431405		0.0223207	0.0330298	0.0859608		0.0990518	0.179848	0.177416		0.0102256	0.0793914	0.0784323		0.560808	0.62127	0.366258		0.687326	0.615246	0.314783		0.0411961	0.0432772	0.0628279
282	0.0531804	0.0443632	0.165121		0.26016	0.350912	0.534031		0.0391436	0.0384022	0.0799376		0.0902495	0.129448	0.326107		0.023017	0.0530769	0.0876032		0.577054	0.617672	0.48044		0.569451	0.72069	0.597403		0.0293212	0.0495449	0.0130037
283	0.0534373	0.0603643	0.0768324		0.302465	0.478666	0.587034		0.0323997	0.0777994	0.0629645		0.0950548	0.172057	0.25453		0.0260224	0.0708852	0.0566681		0.602472	0.589558	0.373801		0.633288	0.822814	0.922382		0.0425889	0.0240264	0.0101292
284	0.0384836	0.0348167	0.184331		0.305854	0.442528	0.276626		0.0647995	0.0982442	0.0550257		0.130647	0.158882	0.151756		0.0364681	0.0832715	0.0386001		0.502169	0.563278	0.446423		0.622463	0.824852	0.379463		0.0341591	0.105606	0.105124
285	0.0381164	0.0364161	0.1016		0.371024	0.433299	0.475508		0.0181424	0.0648659	0.064744		0.197872	0.198512	0.200883		0.0409395	0.0555144	0.11101		0.474305	0.515102	0.168054		0.626729	0.661618	0.614803		0.0309704	0.0609364	0.0589951
286	0.0248856	0.0554523	0.126201		0.283957	0.340697	0.474517		0.0571394	0.0416854	0.0533833		0.0772204	0.108641	0.1175		0.0637733	0.0467097	0.0262811		0.450258	0.487416	0.311833		0.639479	0.885905	0.497749		0.0313736	0.0461126	0.0495505
287	0.0532544	0.0874568	0.0640281		0.303099	0.419715	0.66676		0.0142207	0.0915287	0.0569418		0.131915	0.165469	0.172169		0.022394	0.0383029	0.0557103		0.505255	0.495711	0.369382		0.697821	0.768285	0.656807		0.0545005	0.0546189	0.0960894
288	0.0584214	0.0343753	0.0470069		0.38782	0.327113	0.521167		0.0445313	0.0863056	0.0839075		0.0862144	0.19987	0.15832		0.0222839	0.0758595	0.0499608		0.553778	0.552667	0.255572		0.662849	0.705427	0.543623		0.038264	0.0519824	0.0281972
289	0.0740355	0.0852499	0.100586		0.240646	0.363822	0.524134		0.0243731	0.0412873	0.0488659		0.10674	0.164894	0.180914		0.024703	0.0652144	0.0453074		0.571653	0.61566	0.296207		0.59401	0.658589	0.702159		0.0730461	0.0612845	0.0344936
290	0.0384836	0.0510385	0.116426		0.263475	0.40022	0.646262		0.0339758	0.0799385	0.0260073		0.171044	0.10932	0.144615		0.0415259	0.0559123	0.0294293		0.565481	0.610963	0.271204		0.684743	0.593517	0.467166		0.024813	0.0229818	0.0618696
291	0.0229799	0.083043	0.019877		0.318665	0.45829	0.444414		0.03995	0.0552157	0.0903405		0.112082	0.188317	0.173479		0.0448245	0.0788442	0.0425695		0.641437	0.748292	0.307238		0.814836	0.626257	0.548543		0.0525946	0.0574543	0.0406534
292	0.0568452	0.0590402	0.106651		0.314978	0.28579	0.403137		0.034892	0.023081	0.0496871		0.0982831	0.21064	0.119832		0.0492959	0.0617322	0.0949945		0.635522	0.524433	0.189198		0.795116	0.716612	0.622536		0.0527412	0.101677	0.104987
293	0.045594	0.0617977	0.134962		0.27811	0.391456	0.439745		0.0284047	0.0455654	0.00561179		0.132568	0.180684	0.16867		0.0162731	0.0545194	0.0986901		0.580654	0.602731	0.297678		0.605079	0.745624	0.503199		0.0296509	0.0251206	0.0781586
294	0.0361745	0.044031	0.200338		0.262991	0.345311	0.532189		0.0377143	0.0531265	0.0391476		0.119116	0.140427	0.174501		0.0294676	0.0317366	0.0269651		0.566594	0.604682	0.274146		0.787202	0.700184	0.52394		0.0394002	0.0227828	0.0412008
295	0.0658627	0.0509293	0.120303		0.266678	0.400427	0.375009		0.0362115	0.0679501	0.0125928		0.100551	0.207609	0.106711		0.0218074	0.090534	0.107451		0.535045	0.649748	0.213837		0.634108	0.814309	0.65435		0.0507621	0.0620307	0.0860974
296	0.0610237	0.0502672	0.0352101		0.348196	0.314876	0.435508		0.0377143	0.0431279	0.0722725		0.076951	0.152766	0.134553		0.0383739	0.0310901	0.144271		0.584898	0.494308	0.336661		0.782159	0.724942	0.563835		0.04772	0.0486496	0.0866448
297	0.033829	0.0248288	0.0869411		0.330284	0.46871	0.576718		0.0375675	0.0278067	0.0657024		0.0975145	0.14299	0.15642		0.029321	0.0697411	0.138386		0.577268	0.572179	0.215308		0.68384	0.695233	0.465586		0.0499192	0.0495449	0.0877398
298	0.0285518	0.0594816	0.161078		0.355532	0.368695	0.301362		0.0411594	0.0891907	0.0529724		0.100397	0.0870472	0.303368		0.0973458	0.0661097	0.0328512		0.566594	0.594072	0.27194		0.717584	0.755761	0.487552		0.0528513	0.0591456	0.0555732
299	0.00648627	0.077139	0.110528		0.214206	0.339245	0.483988		0.0392536	0.0664081	0.0254593		0.110699	0.134153	0.267363		0.0684646	0.0743175	0.0566681		0.566723	0.560044	0.325441		0.656986	0.678222	0.463999		0.0253993	0.0217382	0.0086234
300	0.00263863	0.0439764	0.0620064		0.115594	0.433662	0.394231		0.0202315	0.0199472	0.0709038		0.105125	0.132062	0.267068		0.0145139	0.0706364	0.0580368		0.41498	0.560167	0.308709		0.442843	0.763041	0.403718		0.0152836	0.0685472	0.0428432
301	0.017556	0.020415	0.15518		0.0211149	0.399597	0.428863		0.00491122	0.0394468	0.0488659		0.0144523	0.127462	0.372318		0.00458146	0.0326321	0.0265548		0.0965333	0.573277	0.392186		0.233701	0.769683	0.482103		0.0339758	0.0512861	0.0309345
302	0.0137432	0.0236161	0.031507		0.00562308	0.390627	0.388292		0.00388508	0.0524798	0.0539308		0.0193732	0.11209	0.139951		0.00864971	0.0656621	0.0922572		0.0142316	0.672249	0.425832		0.030915	0.726866	0.656285		0.019865	0.0382035	0.0563944
303	0.00318871	0.0114759	0.0668906		0.00361304	0.267124	0.209763		0.0104822	0.0485499	0.044349		0.00684181	0.0955169	0.183247		0.000183311	0.0458142	0.117443		0.0238766	0.626148	0.305949		0.0325955	0.603654	0.676497		0.0106655	0.0642692	0.155906
304	0	0.0121926	0.0557677		0.00454359	0.0896451	0.144177		0.00645071	0.0474557	0.0229957		0.00146121	0.0422948	0.0459228		0.00238231	0.0318363	0.0566681		0.0241329	0.252886	0.168971		0.0255847	0.36183	0.209505		0.0029321	0.0194002	0.0255965
305	0.00601021	0.0241121	0.0459994		0.00923612	0.0959197	0.0808513		0.0058642	0.0239765	0.0826754		0.00134553	0.0203886	0.0849933		0.0208912	0.0207432	0.0485922		0.0277349	0.117023	0.256125		0.0250928	0.150243	0.162225		0.00267564	0.00228819	0.03203
306	0.0118375	0.0231179	0.0225727		0.0211149	0.067144	0.0921584		0.00454474	0.0140774	0.0730937		0.00161494	0.0317341	0.117789		0.00337187	0.00427814	0.0325775		0.0156456	0.0950065	0.190487		0.0193939	0.153214	0.163805		0.00729368	0.00427794	0.0246381
307	0.00395794	0.00209547	0.00876083		0.018397	0.0380562	0.118596		0.00985916	0.0124359	0.0435278		0.000538821	0.0256701	0.044318		0.00399495	0.0217878	0.0228586		0.0569687	0.111229	0.129442		0.0105372	0.0841231	0.135512		0.0033353	0.0096007	0.0503717
308	0.00850225	0.0141242	0.0510504		0.0131839	0.0320424	0.116474		0.020708	0.0232304	0.0206687		0.010609	0.0117119	0.0167643		0.00729353	0.0453665	0.0620067		0.0246048	0.100312	0.10168		0.0173433	0.0625669	0.16416		0.00491136	0.00373091	0.0294293
309	0.0114355	0.0270357	0.0156667		0.0119924	0.0403887	0.101629		0.0190587	0.00736196	0.0336724		0.00107764	0.0157884	0.0597718		0.00256562	0.0161668	0.0610484		0.00758768	0.103362	0.188098		0.0188192	0.126359	0.252741		0.00850312	0.00706372	0.0558469
310	0.0116547	0.0183173	0.0102755		0.00986877	0.040442	0.0613438		0.00557102	0.0228324	0.0206687		0.00457389	0.00810328	0.0597718		0.00864971	0.0126351	0.0422958		0.0229769	0.0786654	0.182026		0.0101686	0.101075	0.152913		0.00344531	0.00552171	0.00889713
311	0.0121307	0.00468913	0.0399275		0.00942194	0.022035	0.044663		0.00139276	0.00736196	0.00807593		0.00480525	0.0253554	0.0103507		0.00238231	0.00756111	0.05133		0.0274769	0.101106	0.19361		0.029069	0.100842	0.238855		0.0132312	0.0212904	0.0287447
312	0.00612052	0.0144563	0.0321809		3.83425e-05	0.0139474	0.0224742		0.00377507	0.00741179	0.039695		0.00618883	0.0102461	0.0103507		0.00535113	0.00552171	0.0290184		0.0262768	0.122816	0.108852		0.012013	0.0635566	0.110554		0.010629	0.00149237	0.0221745
313	0.0067809	0.0457966	0.0603183		0.00327681	0.0488417	0.0335015		0.00304212	0.019997	0.00985546		0.00799556	0.0213824	0.0360109		0.00157592	0.0165151	0.0362731		0.0408088	0.114337	0.141762		0.0344821	0.0454978	0.182785		0.00447145	0.0251705	0.0573527
314	0.00751385	0.035258	0.0395939		0.00204838	0.0290344	0.0421217		0.0149537	0.0273093	0.0584476		0.0186807	0.0177759	0.068229		0.00164936	0.0171618	0.0886981		0.00895923	0.13623	0.228181		0.0041824	0.103347	0.145354		0.00384836	0.0240264	0.126614
315	0.00465461	0.0269811	0.0645286		0.00301726	0.0592104	0.0773192		0.00315199	0.0201461	0.0279235		0.0121083	0.00360652	0.0469446		0.00502123	0.00218871	0.0246381		0.0366076	0.145317	0.193057		0.0172216	0.0962392	0.187887		0.00736697	0.0314382	0.00889713
316	0.00513067	0.0486655	0.0202173		0.00469253	0.025353	0.0299638		0.00608409	0.0181068	0.0520141		0.00607315	0.00993346	0.0766804		0.0126081	0.0226335	0.0410637		0.049252	0.115009	0.16603		0.0210744	0.0769554	0.10651		0.0100059	0.0215889	0.0375052
317	0.00491151	0.00584721	0.0645286		0.00446985	0	0.0479152		0.0107754	0.0278067	0.0242278		0	0.0184549	0.0635646		0.0157967	0.039447	0.0294293		0.0279064	0.0685424	0.0897243		0.0119319	0.0493434	0.0664338		0.00802663	0.0277075	0.0139615
318	0.00916263	0.0315609	0.0397607		0.00651675	0.0111469	0.0361827		0.006524	0.00422811	0.0807593		0.0142605	0.00940966	0.0202684		0.0080632	0.0166146	0.0202579		0.0218193	0.0836037	0.0553432		0.010292	0.0781804	0.121446		0.0103356	0.0133314	0.0213533
319	0.0144776	0.0368029	0.0547602		0.00748564	0.0345822	0.0500367		0.0125714	0.0202456	0.052425		0.000730605	0.0236308	0.0153095		0.00318871	0.0101479	0.0376418		0.00441511	0.14184	0.0847659		0.0221817	0.0725883	0.114068		0.0106655	0.0237279	0.108683
320	0.00982156	0.0046345	0.0523982		0.00163841	0.0286197	0.00551361		0.00216243	0.0171616	0.067071		0.0251389	0.0166248	0.0129773		0.00256562	0.0227828	0.0177943		0.0162889	0.144341	0.185703		0.0262001	0.120997	0.243776		0.00377507	0.00427794	0.0997856
321	0.013781	0.0144563	0.0229129		0.00748564	0.0129619	0.028973		0.00557102	0.011242	0.0696718		0.00795751	0.000260862	0.0260989		0.00146605	0.0147243	0.0109504		0.0286346	0.131412	0.075752		0.0228782	0.145292	0.0947334		0.0121316	0.0137792	0.0498242
322	0.00696378	0.00419312	0.0416156		0.00677778	0.0161238	0.0479152		0.0100792	0.0340744	0.0323037		0.00780378	0.0443341	0.0437349		0.00483792	0.0186043	0.0217637		0.03022	0.0878128	0.208318		0.0272246	0.0496341	0.271192		0.0062674	0.00238767	0.0450331
323	0.00835566	0.0157805	0.0609922		0.00905031	0.0361898	0.127496		0.00197912	0.00149217	0.0309345		0.0126471	0.0164157	0.0664798		0.00436143	0.00965034	0.0492768		0.025591	0.104948	0.11124		0.0329234	0.102064	0.0905156		0.00476477	0.00432778	0.0427066
324	0.00978528	0.0148409	0.0200505		0.000187288	0.00466489	0.056681		0.00692706	0.0393474	0.0328512		0.00107764	0.0113454	0.0309077		0.00736683	0.00910331	0.0574893		0.0248628	0.127389	0.129996		0.015007	0.108881	0.117757		0.00348189	0.0307915	0.00109493
325	0.0028215	0.0384023	0.0266228		0.00655509	0.0290344	0.0781645		0.00472805	0.016117	0.0421586		0.0161829	0.0118671	0.00670802		0.0059375	0.0131823	0.055436		0.0134609	0.105192	0.391633		0.0245602	0.138999	0.255901		0.0139641	0.00945139	0.0546148
326	0.00703635	0.00402706	0.0168478		0.00476774	0.0163825	0.0448086		0.0127913	0.00502413	0.0358622		0.00684181	0.0108216	0.0341174		0.0174826	0.00293489	0.0803484		0.0115309	0.0737247	0.248589		0.0292752	0.0677529	0.113185		0.00553445	0.0228324	0.00875999
327	0.00700006	0.011808	0.00168144		0.00774666	0.0244722	0.025441		0.0188755	0.00681473	0.0472235		0.00319031	0.0203369	0.0180805		0.00744027	0.00462621	0.0606375		0.0204036	0.0398205	0.0632504		0.024354	0.0993259	0.113185		0.014294	0.0175099	0.061733
328	0.00527726	0.00220691	0.0107826		0.00312786	0.031989	0.0494713		0.0133778	0.0165645	0.0552994		0.00196046	0.0115545	0.0139991		0.00472805	0.00159184	0.0269651		0.0249901	0.13178	0.072075		0.0234529	0.147156	0.16029		0.00296882	0.0130826	0.0369572
329	0.000989849	0.0341546	0.0318406		0.0115072	0.0222937	0.0275624		0.00230902	0.0165149	0.0940367		0.00910973	0.0197096	0.107444		0.000916263	0.00910331	0.0143723		0.0148325	0.156476	0.142497		0.0215663	0.10492	0.17769		0.00828324	0.00850625	0.061185
330	0.0231265	0.00270291	0.028471		0.00104262	0.0116643	0.0388695		0.0131945	0.0394468	0.0229957		0.0135695	0.0261918	0.0323624		0.00263892	0.0212408	0.0359994		0.00745867	0.0926907	0.237005		0.0257487	0.124901	0.0957844		0.00568104	0.0246232	0.0145089
331	0.00117272	0.0376856	0.036558		0.0019363	0.0205834	0.0142738		0.00480135	0.00442706	0.0472235		0.00511271	0.00716335	0.0241997		0.00729353	0.00218871	0.011087		0.0603552	0.079641	0.151322		0.0196391	0.105735	0.190873		0.00696378	0.0278566	0.0468126
332	0.00516695	0.0163879	0.0288113		0.00227253	0.0157091	0.0473498		0.00351846	0.0193005	0.0260073		0.0121083	0.0123909	0.0604992		0.0104457	0.012834	0.0669344		0.0331787	0.115376	0.142497		0.0190254	0.0765494	0.131991		0.0197918	0.0026863	0.0209425
333	0.00491151	0.00811092	0.024094		0.00700193	0.0312129	0.0166752		0.000952984	0.0346217	0.0251856		0.00926346	0.0122854	0.0419857		0.00568089	0.021987	0.0235432		0.030607	0.0941541	0.276163		0.0280851	0.103172	0.214071		0.00634069	0.0113417	0.00684386
334	0.00897976	0.0168293	0.0165075		0.00729982	0.0179902	0.0237449		0.00370177	0.0250212	0.0455811		0.00784183	0.00130638	0.0103507		0.00828324	0.00656633	0.0506454		0.0179185	0.164587	0.182397		0.0199671	0.0953072	0.180154		0.003262	0.0193505	0.0031482
335	0.0244458	0.0168293	0.00488418		0.0176154	0.0134793	0.0370335		0.00186925	0.0160672	0.0424329		0.00123137	0.0197613	0.0432962		0.0101523	0.0107944	0.0331249		0.016204	0.129341	0.239575		0.00680614	0.134514	0.160993		0.00571761	0.00432778	0.00999206
336	0.0145139	0.032223	0.0358841		0.00640615	0.00497698	0.0388695		0.000659802	0.00676509	0.0488659		0.00107764	0.0141155	0.000294414		0.00982258	0.00452674	0.0140986		0.0326202	0.0411607	0.103886		0.0178775	0.0245252	0.082254		0.0127914	0.014575	0.00725473
337	0.0539511	0.0141242	0.0588037		3.83425e-05	0.0205834	0.0445231		0.000733098	0.00417847	0.0138249		0.00334404	0.0201278	0.0463615		0.00809992	0.00825765	0.0260073		0.027005	0.173976	0.168054		0.0191894	0.0916368	0.101589		0.00520454	0.00905347	0.0253227
338	0.00993187	0.0269264	0.0235869		0.00930986	0.0328719	0.0192221		0.0091262	0.0304432	0.0206687		0.0126471	0.0149002	0.0258045		0.0146605	0.0155201	0.120043		0.0606556	0.120681	0.17026		0.037023	0.122571	0.15379		0.00201584	0.0163658	0.038463
339	0.0178855	0.0171592	0.0456591		0.0526959	0.0211008	0.0883465		0.0453743	0.00631734	0.0710404		0.0167598	0.0117119	0.0593331		0.0251427	0.00641701	0.0745995		0.404607	0.110802	0.171731		0.367853	0.130553	0.23692		0.00769687	0.011491	0.0440753
340	0.0487464	0.0345413	0.0220722		0.0250259	0.00497698	0.0732162		0.0465839	0.00885432	0.0158781		0.0248695	0.01307	0.122892		0.0320332	0.0174104	0.0576264		0.858294	0.129705	0.15647		0.785931	0.0888408	0.129708		0.043212	0.0379547	0.0776106
341	0.0143673	0.028858	0.0286445		0.00949715	0.0243675	0.0474954		0.0160533	0	0.0591322		0.00668808	0.0196061	0.0065637		0.0189854	0.00248734	0.131131		1.06263	0.103789	0.154263		1.10741	0.0789371	0.184191		0.0139641	0.0179078	0.00150526
342	0.0102251	0.00672997	0.0397607		0.0236485	0.0636187	0.0407055		0.01598	0.0196488	0.0491396		0.0110321	0.0222188	0.0110838		0.0254359	0.0220366	0.0639228		1.00931	0.440829	0.923185		1.16305	0.223821	0.480697		0.0223574	0.00363144	0.0606375
343	0.018289	0.0243874	0.0128043		0.0266643	0.058693	0.0521582		0.0157601	0.0413371	0.0245015		0.0323643	0.0152128	0.0664798		0.0197183	0.00616842	0.101154		1.01595	0.880924	0.945247		1.11742	0.983019	0.929238		0.0251062	0.0232802	0.0150564
344	0.0320322	0.0178213	0.00656562		0.0182112	0.0212055	0.0445231		0.0303473	0.0255684	0.0494134		0.016259	0.0714161	0.0268263		0.0172261	0.0271602	0.0184789		0.945781	0.94654	1.23704		1.0838	0.918412	1.15368		0.024703	0.0168632	0.0410637
345	0.0120582	0.0274224	0.0304928		0.0106504	0.0338574	0.0195075		0.0247763	0.0169627	0.0314825		0.0289441	0.0230035	0.0586057		0.0254726	0.0297468	0.0969112		1.03408	1.02728	1.21351		1.04919	0.944163	0.868247		0.0125348	0.0188033	0.0164256
346	0.0204138	0.00987645	0.0744704		0.00867721	0.0121324	0.0462191		0.0299075	0.0469581	0.00383226		0.0115314	0.00888794	0.00685234		0.0142207	0.0180571	0.027376		0.952897	1.00837	1.21498		1.06178	0.970667	0.939608		0.0183257	0.0229818	0.0462652
347	0.0287709	0.0136828	0.108847		0.0226796	0.030486	0.0421217		0.0343057	0.0215887	0.0654286		0.0211404	0.0116063	0.0249328		0.018289	0.0252203	0.0264177		1.06683	0.969589	1.13592		1.09716	1.08351	0.899358		0.0224672	0.022733	0.00410599
348	0.0111046	0.00391562	0.024094		0.0206681	0.0425671	0.0347721		0.0185456	0.038452	0.0474972		0.00699554	0.0376946	0.0195352		0.00623068	0.0279064	0.036136		0.988218	1.15107	1.1133		0.994457	1.07314	1.06492		0.0178492	0.0296972	0.020395
349	0.0179218	0.0166632	0.032688		0.0248017	0.0329745	0.0264317		0.0225773	0.00850605	0.0368206		0.00910973	0.042713	0.0434463		0.00711037	0.0102474	0.00848626		1.11416	0.99947	1.12636		0.977648	1.13233	0.823076		0.0218076	0.0113913	0.0354519
350	0.0138535	0.0128547	0.0338623		0.0217859	0.0163312	0.00904567		0.014294	0.00616822	0.0381892		0.021871	0.0583461	0.0483993		0.00945596	0.015371	0.0145089		1.06499	1.03783	1.0815		0.956122	0.901809	1.11536		0.00612081	0.0112918	0.0376418
351	0.0147331	0.0262076	0.0279706		0.0110235	0.032145	0.0212036		0.0130113	0.0130328	0.00520146		0.0158359	0.0173577	0.0374656		0.0158334	0.0176592	0.0269651		1.11433	0.912268	0.871337		0.984863	1.04028	1.02644		0.0339025	0.0154705	0.0683031
352	0.024739	0.0019294	0.0562748		0.0121413	0.0265973	0.0653013		0.0220641	0.0327812	0.034357		0.0347479	0.0356553	0.0226006		0.0204514	0.0104464	0.00821253		0.910545	1.0363	0.940653		1.0357	1.1519	1.00974		0.0154302	0.019649	0.011087
353	0.00406825	0.0282506	0.0188695		0.0513539	0.0236427	0.0228997		0.00820994	0.0322836	0.0569418		0.0064963	0.0192914	0.0567122		0.0120949	0.00910331	0.0462652		0.905959	0.981359	1.15872		0.968258	1.07338	1.12064		0.00773345	0.0215392	0.0881506
354	0.0299437	0.0401679	0.00404346		0.0225307	0.0254043	0.0182313		0.0122416	0.0223847	0.0739149		0.025868	0.0364917	0.0151652		0.0126447	0.05248	0.0223111		1.04236	0.876778	1.09749		1.02189	0.938395	0.977923		0.0122782	0.0273095	0.0112241
355	0.0319959	0.00137877	0.0404346		0.00558621	0.0153457	0.0431125		0.0400966	0.0291498	0.00999206		0.00607315	0.0403094	0.0333842		0.0306772	0.0139781	0.0965003		1.02397	1.07563	1.04527		1.13824	0.983775	1.24683		0.0218442	0.0304434	0.0558469
356	0.0234559	0.0285805	0.0360575		0.033442	0.0191318	0.025301		0.017446	0.0160672	0.112515		0.00910973	0.0265582	0.00466444		0.00952925	0.0231311	0.0780214		1.03726	0.84702	1.06292		0.971949	1.05694	0.953494		0.0288812	0.0418843	0.0164256
357	0.0230162	0.00717135	0.024094		0.0107993	0.0277388	0.0746324		0.0344888	0.00974962	0.0387367		0.0135695	0.0505555	0.0390705		0.0138175	0.0138786	0.0476344		0.912818	1.10399	1.06182		0.961904	0.959075	0.970365		0.00656058	0.0265634	0.0813068
358	0.0229073	0.0505425	0.0175217		0.042864	0.0258725	0.058517		0.0157234	0.0262647	0.0238169		0.0282135	0.0478889	0.0298859		0.0210012	0.0177088	0.0284709		0.96417	1.08082	1.06035		0.937918	0.840989	0.986004		0.0163466	0.00915295	0.0284709
359	0.00996816	0.0242213	0.10076		0.0122519	0.0335453	0.0255809		0.012828	0.0343729	0.0507826		0.0246777	0.0117119	0.00714675		0.00989588	0.0256679	0.0240907		1.06422	0.865252	1.0815		1.08995	1.02287	1.11976		0.0120217	0	0.0206687
360	0.036578	0.0268696	0.00151463		0.0265522	0.0445895	0.0511674		0.0178858	0.0433767	0.0116345		0.0126075	0.0190823	0.0236166		0.0272319	0.0252203	0.0435278		1.16924	0.902329	0.804963		1.06764	1.06866	1.09726		0.0103356	0.0123863	0.0386001
361	0.0214777	0.032223	0.0987379		0.0261437	0.0122351	0.03138		0.00454474	0.0293986	0.0607746		0.010609	0.0251463	0.0208514		0.0110687	0.00621806	0.0104029		1.06053	1.11655	0.734541		1.1127	0.955464	0.986707		0.0243732	0.0431281	0.0117716
362	0.0174094	0.0322776	0.0193766		0.00495356	0.0283096	0.0455138		0.0137077	0.0202955	0.0450336		0.0184508	0.0410402	0.0313464		0.0145139	0.0127346	0.0295658		1.00519	0.873788	0.995814		1.09807	1.00894	0.931695		0.0257292	0.0144259	0.0474972
363	0.0255097	0.00805411	0.15181		0.0149713	0.00876104	0.0138484		0.0258025	0.0362135	0.035041		0.0048433	0.00449676	0.0316351		0.0292477	0.0116899	0.00725473		0.964471	1.01356	0.967862		0.942839	1.05718	0.819213		0.0406829	0.0226335	0.071725
364	0.0267187	0.0189794	0.0345362		0.0103525	0.0221911	0.0223343		0.019865	0.0447694	0.0387367		0.0153747	0.0122336	0.0406753		0.0148071	0.020793	0.043117		0.941881	1.04899	1.01291		1.02406	1.10617	1.00218		0.0165665	0.0247726	0.0516038
365	0.0297608	0.0226219	0.0599847		0.00219732	0.00725809	0.0166752		0.0269387	0.0415859	0.0520141		0.0393598	0.0143246	0.0142877		0.0231269	0.0438743	0.00615926		1.10918	1.1182	1.15394		1.03251	0.909383	1.00815		0.00927279	0.0207432	0.0191629
366	0.0228696	0.0261529	0.0412753		0.00554934	0.0159165	0.0555503		0.0195351	0.021539	0.0399688		0.00534407	0.0165213	0.023328		0.0260224	0.0195991	0.0365468		1.03408	1.07295	0.633232		0.954893	0.980105	1.2811		0.00260234	0.0119385	0.144271
367	0.0303471	0.0407207	0.0173549		0.00141572	0.0254577	0.0514529		0.00579091	0.0394967	0.0806222		0.0253307	0.0242063	0.0164756		0.0251795	0.0371588	0.0015058		1.01621	0.898731	0.654741		0.924101	0.934259	0.823779		0.01598	0.00815798	0.0438016
368	0.0108491	0.00981964	0.0193766		0.0199617	0.0377975	0.0357629		0.0219175	0.0433269	0.0558469		0.0207187	0.020546	0.0937391		0.0166396	0.000895498	0.0869186		0.893399	1.14162	1.01788		0.963707	0.971484	0.820619		0.0091995	0.0231309	0.0245015
369	0.0297245	0.0123587	0		0.0180623	0.0228132	0.0592223		0.0169695	0.0240262	0.046676		0.0223702	0.00998522	0		0.0164565	0.0227828	0.0401059		1.13636	0.960261	0.563917		1.0052	0.997292	0.907968		0.0203048	0.0165151	0.0281972
370	0.00868658	0.0014334	0.0817166		0.00912404	0.0230719	0.0641705		0.0244464	0.0246729	0.0364097		0.0138374	0.0155793	0.0523364		0.00656058	0.0326321	0.0745995		1.07854	0.971784	0.831255		0.907906	1.02485	0.799878		0.0264989	0.00965034	0.0495505
371	0.0285881	0.0339339	0.0363912		0.0113582	0.0285683	0.0342068		0.00447145	0.0199472	0.0439382		0.00772615	0.00663956	0.0106451		0.00337187	0.0203951	0.0214899		0.971929	1.05118	1.0815		1.06735	0.865865	0.872646		0.0142575	0.0209422	0.0225849
372	0.0182527	0.0194208	0.0107826		0.0306121	0.0163825	0.0870702		0.027965	0.0141769	0.0329878		0.0268299	0.0131218	0.0469446		0.0189486	0.00636737	0.0229957		1.05955	1.03892	0.857911		0.886874	1.22816	0.8635		0.0102258	0.0263644	0.03203
373	0.0132672	0.00485519	0.031507		0.0103908	0.0325084	0.0667174		0.00820994	0.0332288	0.0517404		0.0138769	0.00496673	0.0527751		0.0312635	0.00979966	0.0276497		0.894644	0.909219	0.900388		1.00746	1.14625	0.934507		0.0190954	0.0362137	0.0552994
374	0.0237128	0.0105385	0.0485215		0.0275948	0.0441234	0.0493314		0.0201948	0.0232304	0.0216271		0.00914931	0.0134365	0.0347004		0.0314101	0.019251	0.0792535		0.942824	1.02459	0.871701		1.04714	0.959716	0.946638		0.0129746	0.00437742	0.00561179
375	0.0336084	0.0161104	0.0283042		0.021376	0.0153457	0.0124378		0.0170795	0.0243246	0.0421586		0.0156441	0.0188732	0.102485		0.0080632	0.0257177	0.0336724		0.901588	1.01051	1.01273		0.911884	0.929423	1.09937		0.0255459	0.0194002	0.0279235
376	0.00740355	0.0306782	0.0754846		0.0185828	0.0141548	0.0333559		0.0221373	0.0106948	0.0272388		0.011262	0.0407276	0.0453398		0.0109953	0.0210418	0.0442119		0.942095	1.08997	0.777011		1.02758	0.942356	0.579474		0.012828	0.012038	0.0142352
377	0.0276345	0.0194208	0.0170146		0.0197375	0.028671	0.099508		0.0227239	0.0226335	0.0781586		0.0334785	0.0383736	0.0638532		0.00729353	0.0101479	0.0808959		0.932879	1.01264	0.875014		0.939066	0.981212	1.01185		0.0181791	0.0213403	0.111557
378	0.0206707	0.0130207	0.0313402		0.0138534	0.01991	0.0149791		0.014184	0.0306421	0.0275126		0.0294814	0.0167304	0.0319295		0.00802663	0.0372583	0.0715879		0.941838	0.949527	0.73987		1.07441	1.13163	0.724654		0.0242999	0.0197484	0.113473
379	0.0280743	0.0434236	0.0269564		0.0156791	0.0163825	0.0144137		0.0269021	0.0241755	0.0335352		0.00588137	0.0191878	0.0342617		0.00883288	0.0148238	0.0533833		1.06482	0.961417	0.791537		0.983962	1.12027	1.07845		0.027012	0.0288017	0.0253227
380	0.0145865	0.0343207	0.0827308		0.0163487	0.0265973	0.0612038		0.00102628	0.0220364	0.0332615		0.0279441	0.0220097	0.0790126		0.00901619	0.00865556	0.0124562		1.03451	0.921476	1.2124		0.942346	0.84967	1.02151		0.0175926	0.0230812	0.0171097
381	0.0208173	0.00286898	0.0208912		0.0108377	0.0328205	0.0247357		0.00864971	0.0294981	0.0201213		0.0101859	0.0160492	0.0606435		0.0217341	0.0303936	0.0236803		0.954097	0.985078	1.0017		0.938082	0.977602	0.982844		0.0354052	0.035567	0.0982798
382	0.0121685	0.0247742	0.0251015		0.0142265	0.0124958	0.0145593		0.00648728	0.0357161	0.0301133		0.00784183	0.0252519	0.0288641		0.00450802	0.0109438	0.0505088		0.922762	0.99947	1.23392		0.867399	0.956745	0.707783		0.0228704	0.0208427	0.0390104
383	0.00403197	0.00937826	0.0470069		0.0192538	0.000568739	0.0356173		0.0140008	0.0290503	0.0193001		0.0127612	0.0146393	0.0434463		0.0124981	0.031289	0.0870557		0.982345	0.920805	0.905718		0.885602	1.1265	1.3094		0.0199018	0.0239765	0.0305242
384	0.015064	0.0130207	0.0645286		0	0.0318863	0.0315199		0.0360282	0.0332786	0.0535199		0.00726495	0.00156931	0.0167643		0.0181057	0.0311896	0.0136877		0.76579	1.01087	1.15228		0.87117	1.01704	1.16405		0.0163832	0.0237776	0.0238169
385	0.0034456	0.00165409	0.0795281		0.00432091	0.0138427	0.0258664		0.027122	0.0132816	0.0602272		0.0209486	0.00460028	0.00641938		0.00604751	0.0379547	0.0323037		0.479321	0.994897	0.857729		0.597044	0.92552	0.807611		0.0136344	0.0178083	0.0418849
386	0.0135241	0.0115305	0.0459994		0.00640615	0.0178362	0.0101764		0.00575433	0.0119385	0.0119082		0.0118008	0.0287549	0.0389261		0.00472805	0.0053724	0.0815805		0.0747582	0.933367	0.582483		0.176343	0.856021	0.960349		0.0229072	0.0334778	0.0422958
387	0.00993187	0.00976501	0.0434705		0.00860347	0.0240061	0.0158299		0.0137442	0.0216385	0.004654		0.0123777	0.0223244	0.0389261		0.0088696	0.0300951	0.0533833		0.0234913	0.587914	0.171177		0.00508512	0.751973	0.440099		0.0101891	0.0367607	0.022722
388	0.0156126	0.00871618	0.0308331		0.0070388	0.0288784	0		0.00212585	0.0231805	0.0266914		0.00257538	0.0120245	0.0151652		0.00722024	0.0472567	0.0169731		0.0132029	0.0989717	0.0816351		0.014843	0.243571	0.146057		0.0134145	0.00766059	0.0288818
389	0.00238173	0.00761273	0.0323477		0.00502729	0.0157091	0.0551249		0.00124616	0.0127842	0.0199841		0.0151829	0.017043	0.00729108		0.0062674	0.0015422	0.002327		0.00278724	0.0164643	0.0397181		0.00479775	0.0357693	0.020386		0.0171528	0.0109934	0.00150526
390	0.00993187	0.0135168	0.0771661		0.0201475	0.0204274	0.00777503		0.00406825	0.016316	0.0191629		0.00534407	0.000103517	0.00539759		0.0145872	0.0202957	0.0447594		4.24367e-05	0.0107943	0.0503775		0.00381384	0.00326203	0.0462218		0.00590092	0.0053724	0.0149198
391	0.00542385	0.0177121	0.0289781		0.0130718	0.0128572	0.00862026		0.00263892	0.0172611	0.0123191		0.0047672	0.00454852	0.0373213		0.0056076	0.0148238	0.0105395		0.00874535	0.0154283	0.0448658		0.00225518	0.00367036	0.0147623		0.0127914	0.0254689	0.0290184
392	0.013048	0.0161104	0.00555809		0.00108096	0.0090218	0.0621946		0.0165298	0.0113415	0.0328512		0.00307615	0	0.00320969		0.00674389	0.0259665	0.0323037		0.003215	0.0121973	0.0367765		0.0125472	0.00326203	0.0128274		0.00553445	0.0211411	0.0124557
393	0.00766044	0.0141788	0.0126375		0.0019363	0.033804	0.0401402		0.0129013	0.0111425	0.0187526		0.000808232	0.00433942	0.00729108		0.00509453	0.00517344	0.0173834		0.00398735	0.0129894	0.0452298		0.00598622	0.0246429	0.0065007		0.00190597	0.00388003	0.00766506
394	0.0103354	0	0.00471737		0.00506564	0.0247822	0.00395748		0.00322528	0.0123364	0.0416112		0.00780378	0.0304277	0.0220175		0.00685376	0.0293988	0.0416112		0.006301	0.0083553	0.0808997		0.00241917	0.0171268	0.0263647		0.00817322	0.000945139	0.00383226
395	0.00370105	0.00479838	0.0183624		0.0145613	0.0183023	0.0459393		0.00978586	0.012585	0.0245015		0.0184508	0.0104552	0.00335401		0.00645056	0.00910331	0		0.00407223	0.00231823	0.0560786		0.0161143	0.00856341	0.0196831		0.0101158	0.0190022	0.018068
396	0.00784332	0	0.0252683		0.00372512	0.01042	0.0463647		0.0062674	0.0158682	0.0106767		0.00215376	0.0176703	0.0520478		0.00278551	0.0271106	0.0324403		0.00184345	0.0274421	0		0.00889734	0.00151336	0.0087836		0.00681718	0.0180571	0.00191613
397	0.00318871	0.0155598	0.0338623		0.0157529	0.0163825	0.0202128		0.00718366	0.0186041	0.0279235		0.00415227	0.010037	0.0258045		0.00678046	0.0214398	0.0279235		0.00334401	0.00201155	0.0884428		0.00159925	0.0210302	0.0383151		0.00476477	0.00218871	0.00958119
398	0.00205227	0.00286898	0.0495357		0.00376199	0.00507964	0.0416963		0	0.00567063	0.000547466		0.0011918	0.00444293	0.0604992		0.00505781	0.00159184	0.0479081		0.00175858	6.03707e-05	0.0240857		0.00869277	0	0.0729414		0.00897961	0.010695	0.00848626
399	0.00674316	0.00347424	0.0139853		0.00189943	0.00948787	0.0513073		0.000659802	0.00870501	0.0433907		0.0006545	0.0123392	0.00947898		0.00282209	0.0144755	0.0784323		0.00874535	0.010123	0.0069898		0.00795403	0.0104851	0.104749		0.014404	0.00139289	0.055984
400	0.0223935	0.0141788	0.0202173		0.00744877	0.022035	0.00381195		0.00377507	0.0285033	0.00848626		0.0191038	0.0126518	0.0428632		0.00359176	0.0105458	0.0195738		0.00227291	0.0129894	0.0961607		0.0022974	0.0108358	0.0101895		0.00208913	0.00840677	0.0228586

## Sheet: Supplement 1F
	X_Cell 0	Y_Cell 0	X_Cell 1	Y_Cell 1	X_Cell 2	Y_Cell 2	X_Cell 3	Y_Cell 3	X_Cell 4	Y_Cell 4	X_Cell 5	Y_Cell 5	X_Cell 6	Y_Cell 6	X_Cell 7	Y_Cell 7	X_Cell 8	Y_Cell 8	X_Cell 9	Y_Cell 9	X_Cell 10	Y_Cell 10	X_Cell 11	Y_Cell 11
0	0	0	0	0	0	0	0	0	0	0	0	0	0	0	0	0	0	0	0	0	0	0	0	0
1	-1.17998	-0.525512	0.947856	-0.428792	0.9672	-0.251472	2.00855	-1.86992	0	0	-0.356252	0.960752	0.253084	1.80222	-0.204724	-0.166036	0	0	-0.151528	1.31862	-3.4932	-0.403	-5.12938	-3.67052
2	-1.75386	-0.299832	2.70977	-0.91078	0.214396	-1.0075	1.59266	-0.946244	0	1.612	-1.10906	0.997828	0.843076	2.54857	-1.2767	0.211172	0	0	-1.43468	1.15419	-1.209	-7.38941	0.399776	-3.78014
3	-2.83228	0.785044	0.9672	-1.37987	0.989768	-0.730236	1.42662	-1.88926	1.612	0	-1.48949	0.203112	0.4433	1.42662	-1.81189	1.12195	0	0	0.997828	-2.85002	0	-5.9112	-0.01612	-2.19393
4	-3.16274	0.478764	1.71033	-1.10906	-0.606112	-0.93496	0.399776	-2.25196	1.612	0	-3.12889	-0.401388	-0.327236	0.860808	-3.3175	-0.359476	0	-1.612	-0.752804	0.414284	1.209	-3.35941	2.92739	7.93426
5	-1.0607	-0.349804	0.320788	-1.81672	-1.76675	-0.27404	0.372372	-2.30516	0	0	-4.81182	-0.594828	-0.74152	0.581932	-2.01339	0.243412	0	-1.612	-0.933348	0.117676	5.7758	2.5518	2.01016	-3.75435
6	0.119288	0.783432	0.151528	-1.32668	-2.3648	-0.146692	0.130572	-2.09076	1.612	1.612	-4.68286	-1.34602	-0.659308	0.377208	-1.47982	-0.720564	0	-1.612	-0.99944	-0.851136	-1.3428	-0.941408	3.01283	-4.05096
7	1.18482	1.42501	0.41912	-1.73935	-1.40728	-0.029016	0.240188	-2.6195	1.612	0	-5.35023	-2.0021	-0.078988	0.183768	-1.69905	-0.340132	0	-3.224	-1.70066	1.83929	-0.806	-0.806	-0.151528	-2.54374
8	1.07198	0.575484	1.96664	-1.55558	-0.41912	0.37882	0.986544	-3.48192	1.612	1.612	-6.27713	-2.18748	-0.315952	0.277264	-1.87959	0.27404	0	-3.224	0.909168	1.28315	-1.4782	-2.15041	5.20998	-6.25295
9	2.02467	1.01717	3.43195	-1.13324	-1.28476	0.835016	0.946244	-2.68398	1.612	1.612	-8.12126	-3.13695	-1.01878	0.530348	-1.17192	-0.680264	0	-3.224	0.75764	3.17886	-0.536796	-4.2992	3.36102	-4.84084
10	1.87637	1.73451	3.16758	-0.432016	-0.552916	2.03596	2.04402	-2.84357	1.612	0	-8.85149	-4.12833	-1.39116	-0.511004	-1.74418	-0.617396	0	-3.224	1.15903	1.04296	1.38793	0.464256	-2.41639	-3.46741
11	1.23802	1.05102	4.00421	-1.49594	-0.269204	1.17837	1.37504	-3.70921	3.224	1.612	-9.38829	-4.66513	-0.041912	-0.880152	-2.84679	0.955916	0	-3.224	0.456196	1.69744	-0.536796	-0.806	0.253084	-5.34539
12	0.872092	1.55236	3.25946	-1.95374	-1.29282	0.546468	1.05102	-3.42228	3.224	1.612	-9.9138	-4.81021	-0.324012	-1.05586	-3.70921	0.006448	0	-3.224	2.11172	0.33852	-0.269204	0.670592	1.81672	-3.04184
13	2.87742	1.76836	2.02628	-2.18748	-1.79577	1.72645	0.61256	-4.07836	3.224	1.612	-11.2034	-4.20087	-0.154752	0.481988	-2.32934	-0.86242	0	-3.224	0.747968	2.70494	-0.939796	0.403	1.46853	-2.81294
14	3.50449	1.83607	1.75869	-2.89676	-2.80972	2.03112	0.46748	-5.51949	3.224	1.612	-11.5613	-4.64095	-0.20956	0.509392	-2.62756	0.875316	0	-4.836	0.1209	2.43734	-0.133796	0.403	1.08649	-1.39438
15	3.47708	2.80327	2.2036	-2.29065	-2.6872	1.56364	-0.12896	-5.8564	3.224	3.224	-13.2152	-4.45557	-1.12518	0.610948	-2.0827	1.03974	0	-4.836	-0.240188	4.6619	0.269204	0.536796	4.31855	-2.87903
16	3.54479	2.64046	2.06981	-2.15524	-3.11438	4.11866	-1.47659	-5.19386	3.224	0	-13.7068	-5.10359	-1.07843	-0.617396	-2.04885	1.31862	0	-4.836	0.240188	4.21054	-0.133796	0.403	0.059644	-2.12623
17	3.39165	3.08859	2.72106	-3.01283	-1.66842	2.28582	0.093496	-6.00309	3.224	1.612	-13.7794	-5.30993	-0.456196	-1.20416	-2.15202	1.98115	0	-6.448	1.4508	1.87637	0.461032	1.7055	4.6877	-1.27187
18	2.7807	2.82906	4.2315	-3.59476	-1.31056	1.27832	-0.62868	-5.98858	3.224	1.612	-14.4113	-4.52327	-0.23374	0.607724	-2.3374	2.49699	0	-4.836	1.69744	2.87097	0.58838	2.16653	1.91989	-0.498108
19	2.75007	3.39326	3.0628	-4.19442	-1.64263	2.05369	-0.678652	-6.66884	3.224	1.612	-15.3607	-5.34378	-0.296608	-0.14508	-0.996216	1.45725	0	-6.448	1.6797	3.85752	-0.65286	-0.481988	2.72912	-2.00694
20	2.37125	3.51255	2.49376	-4.21054	-2.71944	2.06175	-0.739908	-5.98858	1.612	1.612	-17.9545	-5.54044	-1.7055	0.259532	-1.82156	3.0354	0	-4.836	1.81834	2.75491	-1.5588	-0.656084	3.84462	-2.89354
21	3.39004	3.68503	2.85485	-4.2041	-2.52117	3.98003	-0.186992	-5.86446	1.612	4.836	-18.0818	-4.20571	-2.05046	1.08004	-3.43195	3.29009	0	-6.448	1.66681	2.67108	0.87048	1.17676	3.80432	-1.02846
22	3.5738	3.84462	1.57009	-4.00743	-1.94568	2.80972	-1.03974	-5.534	3.224	4.836	-18.3365	-4.61516	-1.48949	0.930124	-2.9419	2.92256	0	-4.836	2.14396	2.69688	-0.586768	1.38954	1.72162	-0.818896
23	6.19008	4.37658	2.46152	-4.73606	-1.55397	2.89354	-3.04184	-5.67908	3.224	4.836	-18.8588	-4.51199	-0.893048	0.815672	-2.33418	3.24334	0	-6.448	1.09455	3.63022	0.806	2.83067	2.47764	-2.35674
24	7.29591	4.46363	1.46531	-3.627	-5.21482	3.44646	-2.75168	-5.29864	3.224	6.448	-19.9469	-4.54262	-2.48893	0.949468	-1.70711	3.0225	0	-4.836	1.1816	3.2111	1.52979	2.82584	3.48998	-1.71678
25	9.01914	4.9698	2.23262	-3.97358	-3.20304	1.78448	-5.44211	-3.68664	3.224	6.448	-21.6185	-4.41527	-2.50021	1.37342	0.033852	4.08803	0	-4.836	2.56147	2.89193	0.349804	2.13429	3.18209	-3.04184
26	7.96812	5.01816	1.03329	-5.58074	-3.60282	0.373984	-4.5668	-4.50876	3.224	8.06	-23.0484	-4.41849	-2.95802	0.557752	-0.888212	4.27825	0	-4.836	1.55236	2.59854	-2.71944	2.00694	5.02299	0.196664
27	8.24699	5.59525	4.99398	-4.71832	-2.94835	3.67697	-6.90903	-4.10254	1.612	9.672	-23.6303	-3.81399	-1.5846	2.10688	-1.90216	5.51949	0	-6.448	2.29549	4.52972	-0.049972	2.00372	2.68882	-2.08754
28	7.41198	5.37118	4.3653	-5.96118	-1.72968	2.99187	-6.95739	-4.05096	3.224	9.672	-24.2284	-4.68286	-1.78126	1.69744	-1.56686	5.68552	0	-4.836	1.78448	3.05796	0.86242	-0.259532	3.43195	-3.19015
29	6.84778	6.30453	5.21643	-4.72638	-0.896272	1.36214	-6.63983	-4.22183	3.224	11.284	-24.7523	-5.45178	-1.45402	0.696384	-1.46531	5.4002	0	-4.836	1.93924	3.64473	1.70711	3.98325	4.03322	-1.89249
30	7.50064	6.44478	4.43461	-4.91982	-0.29822	1.51206	-6.45767	-3.91555	1.612	11.284	-26.2675	-5.4937	-2.02306	1.20416	-2.22134	6.65111	0	-4.836	2.18265	3.42711	3.32717	5.14389	4.19926	-0.288548
31	7.37006	6.46412	3.1966	-6.15784	-0.280488	4.00904	-6.65756	-2.74201	3.224	12.896	-27.1622	-5.66134	-1.89088	1.57815	-0.923676	5.36474	0	-4.836	2.015	2.83551	1.87476	1.94246	5.46146	-1.60555
32	8.34694	7.1057	5.98697	-6.15623	-1.67809	0.867256	-6.47863	-3.58992	1.612	12.896	-29.5979	-5.21643	-3.26752	0.83824	-1.7861	4.96657	0	-6.448	2.43251	4.1106	1.84735	3.94295	3.28848	-3.63667
33	8.80958	6.63016	5.36474	-5.33088	-0.527124	2.62111	-5.50498	-3.64796	3.224	14.508	-29.7059	-5.40181	-2.88064	1.5185	-1.12034	5.38892	0	-6.448	2.83067	2.66464	1.36214	3.55446	3.57703	-0.86242
34	9.74454	7.78435	6.448	-5.04878	-1.18966	1.40405	-7.0928	-3.15146	4.836	12.896	-29.9042	-6.9445	-1.9215	1.05747	-1.79416	5.4131	0	-4.836	2.73073	4.00582	1.8264	5.50498	0.851136	-0.841464
35	9.72681	7.52965	4.55874	-5.70003	-1.0478	3.60927	-8.79991	-2.37448	3.224	14.508	-30.5813	-6.83327	-1.30894	1.10422	-2.25358	5.96924	0	-4.836	1.25414	3.63184	1.62651	4.26858	4.19765	-1.91022
36	8.45978	7.84238	5.75484	-5.84028	-1.06714	2.10527	-9.08846	-2.23746	3.224	16.12	-32.6559	-6.82682	-3.16758	1.53946	-3.39004	5.70003	0	-4.836	2.41155	3.48676	2.28904	6.43188	3.46419	-1.56848
37	8.26634	8.14544	5.84672	-6.75106	0.602888	0.343356	-9.13198	-1.92956	3.224	16.12	-33.1766	-6.34967	-2.3777	1.61522	-2.22778	5.22127	0	-4.836	2.39704	3.01928	3.2514	6.22071	4.07675	-0.238576
38	8.74671	8.5307	6.1933	-5.78063	-0.947856	0.586768	-9.41408	-1.74096	3.224	17.732	-33.3088	-6.74622	-1.01072	2.59532	-1.78126	6.48346	0	-4.836	2.55502	3.1305	0.50778	5.23255	4.05096	0.304668
39	8.51297	9.7123	6.53505	-5.09553	-0.001612	-0.188604	-10.3249	-1.25736	4.836	19.344	-32.3883	-6.61081	-0.581932	1.90055	-2.55824	5.38569	0	-6.448	0.938184	4.138	2.74201	5.76935	3.08698	0.08866
40	8.20024	8.92242	5.96118	-4.53939	-1.90377	1.39438	-10.2926	-1.75708	4.836	19.344	-32.7849	-6.23522	-1.19772	2.17459	-2.7001	6.88002	0	-4.836	2.56308	3.77047	2.95963	5.27285	1.68615	-1.77642
41	10.528	8.6113	6.50281	-5.33572	-1.209	0.98332	-10.6698	-0.801164	3.224	19.344	-33.7134	-6.98318	-1.75547	1.44435	-1.81511	7.10408	0	-4.836	1.6652	3.92844	2.1085	7.52159	5.25351	-0.106392
42	12.68	8.87084	5.91282	-5.44534	-1.8006	1.64908	-10.7891	-0.960752	3.224	20.956	-33.5731	-6.18041	-2.14718	1.00589	-0.883376	8.46139	0	-4.836	1.56203	3.95746	4.12994	7.86817	3.66085	-2.50344
43	12.1206	9.28834	6.92354	-6.13366	-0.907556	-0.062868	-10.7053	-0.50778	4.836	20.956	-32.8509	-6.34483	-1.99727	2.23101	-1.33957	6.2336	0	-4.836	2.88387	2.47764	2.97414	7.22015	1.00266	-0.53196
44	13.3651	8.3824	6.9187	-5.71615	-0.962364	1.56042	-11.4081	0.012896	4.836	22.568	-31.8354	-4.42333	-1.55558	2.70977	0.277264	6.36095	0	-4.836	1.39438	3.31588	4.59259	8.42592	3.67536	-1.73129
45	12.8267	8.00842	8.13254	-5.25834	-0.377208	1.01395	-11.7724	0.269204	4.836	22.568	-30.9117	-4.9569	-0.264368	1.50561	-0.288548	7.11537	0	-4.836	1.42984	3.8011	4.55874	7.67634	3.10632	-1.27348
46	13.1539	8.24054	8.11481	-4.93917	0.109616	1.95052	-12.2996	1.95052	4.836	22.568	-30.9794	-5.09392	-1.31217	1.4105	-1.66197	7.23466	0	-4.836	2.28259	2.19393	4.7022	8.59841	1.86831	-0.42718
47	13.2007	7.549	8.10514	-4.77313	-1.45886	2.55824	-11.4178	3.71888	3.224	24.18	-32.348	-5.00526	-2.36319	0.657696	-2.03273	5.56785	0	-4.836	2.60016	2.78231	5.09876	9.4705	3.14179	-0.03224
48	13.6021	8.8789	7.7908	-4.67158	-1.06231	2.89032	-12.0416	5.03911	4.836	24.18	-31.6162	-4.13478	-1.38793	0.672204	-1.78287	5.97246	0	-4.836	1.67003	3.14824	4.32016	8.168	3.00799	-1.68776
49	15.2673	7.34588	7.47323	-4.75862	-0.852748	3.64473	-10.6021	6.5689	4.836	24.18	-32.1546	-2.16814	-0.715728	0.672204	-1.4105	6.73977	0	-3.224	2.86614	3.5061	4.1509	7.40069	1.504	-1.4105
50	16.062	8.05355	7.00414	-5.61621	-1.03652	3.75435	-10.6376	8.50169	3.224	25.792	-34.8837	0.831792	-2.52278	1.77481	-2.10688	6.9187	0	-3.224	2.54212	2.7001	2.43412	7.09602	1.50238	-1.85702
51	15.1028	8.50491	7.16534	-5.79514	-0.50778	4.43622	-10.7633	10.3458	3.224	27.404	-37.292	2.70977	-3.25463	2.53245	-2.72106	6.62854	0	-4.836	2.14074	3.33362	5.3325	9.55432	5.44534	-1.29605
52	14.5354	8.43076	9.18356	-4.26535	1.01878	5.56624	-10.3748	10.9664	3.224	25.792	-37.5902	3.24012	-2.67914	1.87153	-2.54857	6.79136	0	-3.224	1.44758	3.31427	6.90742	11.5242	2.4051	-1.34602
53	15.335	8.89018	9.83804	-4.78603	1.17354	6.4206	-9.68006	11.4952	3.224	27.404	-38.7283	4.16702	-3.79465	1.35247	-1.38471	6.86873	0	-3.224	1.91183	3.88008	3.86235	9.15938	1.52979	-0.432016
54	15.983	8.99012	9.39957	-4.57808	1.14613	6.66078	-9.07234	12.5446	1.612	29.016	-40.4322	5.11326	-4.16863	2.14718	-0.667368	7.47646	0	-3.224	2.22295	3.88331	3.3175	8.2486	1.13324	-1.87637
55	15.0593	9.28834	8.0471	-5.13583	0.809224	7.2411	-8.09708	11.982	3.224	27.404	-41.6525	4.68447	-4.08481	1.79416	-1.34924	6.50603	0	-3.224	1.86992	3.25302	5.15195	10.0718	3.22722	-1.3299
56	15.4784	8.87728	9.34154	-4.69253	-0.283712	8.0471	-8.13576	12.7961	3.224	29.016	-41.9442	5.58236	-4.39431	2.37931	-2.11333	7.55867	0	-4.836	2.58242	3.63345	4.59742	10.2443	3.96391	-0.465868
57	16.3505	10.0428	8.13899	-4.73606	0.232128	8.4356	-7.9391	13.4425	3.224	29.016	-42.7744	6.19814	-4.98108	1.62328	-1.5991	6.60759	0	-3.224	2.86291	3.48998	5.40181	10.5973	1.96986	-0.83824
58	16.2619	9.3899	7.0525	-4.78764	0.335296	8.72092	-7.14277	14.7659	4.836	29.016	-42.1022	6.10464	-4.04451	0.778596	-1.89088	7.66667	0	-3.224	2.60983	2.46797	5.36474	10.8826	0.183768	-0.938184
59	16.278	9.31897	6.85745	-4.16702	0.253084	10.2443	-7.65861	14.6563	4.836	30.628	-42.0426	8.40658	-4.36368	1.7603	-1.60555	6.40286	0	-3.224	2.11011	2.64046	6.88808	11.7773	-0.3627	-1.46047
60	15.5929	9.38506	7.89074	-5.03911	0.082212	11.0648	-8.5162	16.3183	3.224	32.24	-43.179	9.38668	-5.13422	1.71517	-1.46853	6.65595	0	-3.224	2.93384	3.22078	5.67908	11.226	1.72484	-2.80488
61	16.1442	9.2287	9.55916	-4.90048	0.267592	10.7601	-9.07234	15.4816	3.224	32.24	-44.9248	9.2287	-6.4754	0.83824	-1.62973	6.14494	0	-1.612	1.40566	3.40132	7.96973	12.6252	1.38471	-1.5185
62	16.12	11.4758	7.70375	-5.11326	-0.122512	11.8724	-9.41892	17.2758	4.836	32.24	-44.301	10.8907	-5.84672	0.791492	-1.60394	6.06112	0	-3.224	2.30677	3.38359	6.48991	12.6639	1.01717	-1.52495
63	17.0276	10.391	7.2137	-4.41688	0.183768	13.2861	-10.133	17.7562	4.836	33.852	-44.7652	11.9304	-5.94344	0.449748	-2.21005	5.94989	0	-3.224	2.72589	2.69043	7.96006	11.1212	0.955916	-0.544856
64	17.3193	10.8746	7.28785	-4.82794	-0.997828	13.947	-11.5903	18.5267	3.224	33.852	-45.4745	13.191	-7.23304	0.259532	-3.09826	5.59525	0	-3.224	2.60016	2.28098	7.78596	13.4102	0.461032	-1.61039
65	19.0313	10.4184	5.95634	-4.43945	-1.45725	15.0996	-11.7708	18.5702	3.224	33.852	-46.4433	13.6875	-8.13415	-0.111228	-2.15041	6.00792	0	-3.224	2.53568	2.66947	7.1202	12.514	-0.025792	-0.859196
66	19.4649	10.341	5.03911	-4.52005	-2.64368	14.3742	-11.4758	18.567	3.224	35.464	-46.6464	14.8465	-8.25505	0.315952	-2.41316	6.19492	0	-3.224	1.65069	2.42122	8.2083	13.9148	0.546468	-2.47603
67	20.5079	10.4828	6.34806	-7.40875	-2.50827	15.1141	-13.5327	19.157	4.836	35.464	-47.1639	15.8927	-8.21636	0.275652	-1.35086	6.10948	0	-3.224	2.13751	2.94674	6.93644	13.0443	1.18321	-2.83551
68	21.3493	9.97667	6.26101	-7.61992	-2.36319	15.746	-13.6037	19.7067	4.836	35.464	-47.0398	16.61	-8.40336	0.535184	-2.34868	5.97246	0	-3.224	2.70332	2.09882	9.87511	15.4945	1.38471	-1.63618
69	22.547	9.87995	5.76935	-7.3475	-1.49755	16.0394	-14.4	21.2397	4.836	37.076	-47.5733	17.8287	-9.22386	1.26381	-2.0682	6.81876	0	-1.612	2.5663	2.07948	7.87301	15.0738	1.27509	-1.4637
70	21.9055	10.4619	6.67529	-8.49202	-0.952692	16.6568	-15.0206	22.402	4.836	38.688	-47.6378	17.7207	-10.4264	1.19933	-0.736684	6.56245	0	-1.612	2.15847	3.71244	10.7988	16.0571	1.31217	-1.42823
71	21.4057	11.3823	8.09546	-7.88107	0.309504	17.9915	-15.3398	22.8243	4.836	38.688	-48.1907	19.3392	-11.2856	2.31806	-0.681876	6.44639	0	-1.612	2.45346	3.20466	10.6263	16.4327	0.859196	-1.08488
72	19.9469	10.6811	8.12932	-7.63604	0.702832	18.9813	-15.2302	23.2982	4.836	40.3	-47.7765	19.4407	-11.7499	2.23907	-0.833404	6.27713	0	-1.612	2.00533	2.97092	9.55755	15.9781	1.39277	-2.35836
73	18.3043	11.197	8.79668	-8.32437	1.34118	19.7406	-16.3441	24.878	3.224	40.3	-48.5373	20.0291	-11.4726	3.37392	-0.569036	6.61565	0	0	2.54857	1.42178	11.558	18.8056	1.37987	-2.6469
74	17.495	11.7128	7.8585	-8.6774	1.14936	20.495	-16.797	25.7759	3.224	40.3	-48.7985	20.1194	-12.6993	2.38898	-0.027404	7.16212	0	0	2.2036	1.98598	11.6322	17.6853	1.32506	-1.504
75	17.6788	10.3378	8.21798	-8.5307	1.31217	21.5218	-18.0044	27.1622	3.224	40.3	-48.8742	21.5863	-12.9959	3.28848	-0.917228	7.07668	0	0	2.6598	1.11228	10.6892	18.0157	-0.448136	-0.270816
76	17.5321	11.1357	6.93966	-8.67417	0.520676	22.0538	-18.3043	27.3008	1.612	41.912	-49.3385	21.5331	-13.5763	2.83228	-1.37181	7.36523	0	0	2.40833	3.21594	11.5145	18.5928	0.514228	-0.05642
77	19.2473	11.7724	7.64894	-9.2013	0.069316	21.9087	-18.2688	27.973	3.224	41.912	-48.9097	22.734	-13.3361	3.50932	-0.889824	7.74566	0	1.612	2.48409	2.01339	10.9213	18.8394	0.86242	-0.554528
78	21.4783	11.4855	7.1605	-10.6263	1.00589	22.2714	-18.1011	29.2917	3.224	43.524	-48.7098	23.9108	-13.162	4.5265	-2.58404	7.48613	8.70158	0.752804	2.40672	2.6727	13.1442	18.0415	-0.174096	0.359476
79	20.9963	11.8546	7.28463	-9.4834	-0.270816	22.6019	-17.4838	30.4829	3.224	43.524	-49.2273	24.6072	-14.1937	4.33628	-1.38954	7.10247	9.07717	1.68938	2.11333	1.91183	11.4017	19.5697	1.27993	-0.976872
80	21.8007	12.7622	7.67151	-11.0954	-0.13702	23.4901	-19.1586	31.1422	3.224	43.524	-48.5873	25.5534	-14.2598	4.39592	-1.19772	6.66884	3.36102	0.6851	1.4911	3.11438	12.9282	21.0592	0.422344	-1.50722
81	18.8265	12.5704	7.68924	-10.3974	0.02418	24.6604	-19.8921	32.0724	3.224	43.524	-47.691	26.7769	-13.4957	5.34056	-0.946244	6.76556	0	1.612	1.59588	1.52656	12.8863	21.2639	1.92634	-0.764088
82	19.2763	11.7805	9.85577	-9.52531	-0.204724	25.4632	-20.9866	32.9299	6.448	45.136	-46.8802	27.5426	-12.8396	6.50603	-0.6045	6.78652	0	1.612	2.45024	1.32829	13.8471	20.9931	1.56364	-0.65286
83	19.776	12.4382	8.66289	-9.25127	-0.04836	26.1902	-20.5191	34.413	6.448	43.524	-46.3692	25.9983	-12.3737	6.31582	-0.012896	6.34322	2.96286	2.2036	2.61305	0.992992	14.479	20.9383	0.08866	-0.99944
84	20.7755	11.521	8.7048	-10.3023	-0.027404	26.3626	-21.193	33.9616	3.224	46.748	-47.1413	28.3196	-13.436	8.16317	0.182156	7.35233	9.12876	3.12406	2.66625	1.35892	14.4629	22.4197	1.38148	-1.20416
85	20.7271	9.97667	9.61558	-9.6188	-0.5642	26.843	-20.0436	34.6193	4.836	45.136	-46.2096	27.5829	-12.7944	7.5893	0.236964	8.07773	7.72148	3.12728	2.94029	0.743132	14.2485	21.1881	0.817284	-0.970424
86	20.9753	9.967	11.0728	-10.3764	-0.415896	27.3444	-20.2532	34.6338	4.836	46.748	-46.5707	29.8929	-13.7584	9.9009	-0.559364	6.67529	5.5614	3.37069	2.77909	1.7458	14.6724	21.0237	-0.154752	-0.3627
87	22.2005	10.291	11.0148	-10.8826	-0.501332	27.5007	-20.4885	36.5392	6.448	48.36	-46.0049	30.3491	-13.465	11.6499	-1.86025	7.63282	0	3.224	2.52278	1.02846	14.5934	21.4348	1.81511	-0.037076
88	23.9608	10.0863	12.6026	-10.3716	-0.485212	28.0101	-19.9227	36.0733	6.448	48.36	-45.9114	29.9977	-13.6649	11.9046	-0.810836	7.29752	12.2657	5.14389	3.65763	1.05908	14.8643	22.547	0.438464	-0.373984
89	22.8066	10.0524	13.2635	-10.7134	-0.328848	28.2503	-20.7948	36.5311	6.448	48.36	-46.6642	30.2589	-14.6805	12.6816	-0.270816	8.41786	14.6563	6.35773	3.19982	0.422344	13.3893	23.3031	0.062868	0.963976
90	24.1864	11.0358	13.5618	-11.1518	0.941408	29.2417	-21.82	36.4183	4.836	48.36	-46.2902	30.491	-15.4204	13.3312	-0.79794	7.98585	12.5285	5.89508	2.59532	1.76836	14.292	22.6083	0.256308	1.83446
91	23.611	10.399	14.8256	-9.29479	1.11389	30.1186	-20.3579	36.9551	4.836	48.36	-46.3418	31.376	-16.0636	14.3323	-1.41211	8.41625	11.1921	7.8456	3.49159	-0.03224	15.0641	23.0709	0.353028	2.11978
92	22.7969	10.1846	14.4709	-10.1733	0.751192	30.0235	-22.5906	36.6537	6.448	48.36	-44.9216	31.5356	-15.1609	14.4887	-0.51584	8.95144	14.1888	7.44422	3.63506	-0.132184	15.1464	23.7625	-1.21222	2.69849
93	22.805	10.7198	14.637	-11.6918	0.122512	30.3475	-22.0763	37.0857	8.06	48.36	-44.1527	31.8628	-14.8675	14.8643	-0.535184	7.87784	14.7982	8.01003	3.65763	0.025792	16.3279	24.4411	0.4433	3.12567
94	24.2687	10.6166	15.1818	-10.3361	0.285324	31.2954	-21.28	37.2098	8.06	48.36	-44.6363	31.8837	-14.9432	15.451	-0.786656	7.97618	16.8115	8.9466	4.42816	0.66898	16.0974	23.6932	-0.519064	1.91022
95	24.7474	11.155	15.883	-11.1421	-0.074152	32.3416	-20.4869	39.9147	8.06	49.972	-44.8813	32.6962	-14.9126	16.955	0.778596	8.32114	17.3645	9.72197	4.08481	-0.678652	15.0496	24.8764	0.09672	4.69414
96	24.612	11.6354	15.3156	-11.205	-0.490048	32.9718	-20.3837	39.8615	8.06	49.972	-45.6631	32.5157	-16.1764	16.847	-0.327236	8.46784	19.2634	10.4087	3.14179	0.94302	15.8298	24.7571	-1.97954	5.79998
97	26.0257	12.364	16.0555	-10.3232	-0.53196	33.233	-20.3741	40.8239	9.672	49.972	-45.3585	32.959	-16.3537	16.984	-0.357864	7.4426	19.2892	11.421	3.27075	-0.324012	16.1716	23.9672	-2.46475	5.09876
98	26.3997	13.0959	15.2721	-10.794	-1.23802	34.2905	-19.2489	41.1302	11.284	51.584	-44.6508	33.4345	-15.3527	18.3575	-0.980096	7.94232	18.3139	11.2421	3.01122	0.106392	16.9115	24.9747	-3.00799	7.8311
99	26.9575	14.1872	16.0684	-11.1438	-0.146692	34.8643	-20.0468	41.6783	11.284	51.584	-44.9184	33.2394	-14.89	18.4703	-0.017732	7.44583	19.5439	13.4441	5.01977	-1.16225	16.5617	25.2794	-2.09882	6.18041
100	26.3546	13.6311	17.1485	-11.5806	-0.95108	35.2206	-20.7674	41.4606	9.672	51.584	-46.5417	33.7585	-16.8261	19.2021	-0.610948	8.29696	20.2628	13.328	3.89137	-0.517452	16.3811	26.3514	-0.646412	8.55488
101	25.1665	14.4145	17.9819	-10.8423	-0.417508	35.4447	-21.0721	42.7454	9.672	53.196	-45.9968	33.2652	-17.1501	19.5519	-1.03974	7.33138	21.9039	13.8068	4.69092	-0.343356	17.5869	25.3197	-4.44106	4.92466
102	26.1547	14.9771	15.9427	-10.5683	-1.56203	36.6375	-20.5337	42.4923	9.672	54.808	-44.0898	34.8321	-17.5885	20.3209	-1.68293	7.81336	22.1231	15.2092	4.11705	-1.27187	17.4918	25.0279	-4.80054	9.19162
103	26.5803	15.6171	16.7309	-9.81224	-2.40349	37.3952	-20.9786	42.8034	11.284	54.808	-42.473	35.1513	-16.0426	20.4095	-1.77965	8.06161	21.5073	15.1415	4.66513	-1.02684	18.2849	25.5695	-0.469092	8.53232
104	27.4427	15.7509	18.3671	-10.4135	-2.19877	37.0953	-21.1801	44.0447	12.896	53.196	-41.0996	34.679	-16.1329	19.7373	-1.00589	8.5162	22.3584	15.2479	4.77313	-1.05425	18.3284	25.5212	-2.51633	8.8257
105	29.2723	17.0066	16.8631	-8.89502	-2.4986	38.4236	-21.6717	43.5804	11.284	54.808	-42.1054	35.5091	-16.8164	20.1919	0.245024	7.27496	23.2305	15.0174	4.10576	-0.253084	17.6836	25.231	-3.28364	11.8982
106	30.2057	15.7122	15.1528	-10.2797	-3.25946	37.8562	-21.0253	43.5321	12.896	54.808	-41.1237	36.141	-15.6428	20.6884	-0.357864	7.36523	23.5142	17.6047	4.49587	-0.63674	16.8954	26.6028	-3.57703	10.2281
107	31.2841	16.8938	17.3532	-9.58979	-2.4454	38.875	-21.7684	43.1355	12.896	56.42	-41.3913	38.0496	-15.4913	21.8249	-1.28476	7.61831	23.4852	18.3301	4.67319	0.090272	18.5461	26.4884	-1.84574	11.3066
108	31.8112	17.0985	18.596	-9.53014	-2.42122	39.2216	-22.4116	43.9576	14.508	56.42	-41.6202	38.5574	-15.9507	21.9264	-1.1816	7.3475	24.4186	18.9168	5.20837	-1.01717	17.4757	26.4465	-1.36375	10.2443
109	32.6043	17.7046	17.6595	-9.59301	-2.07142	39.7132	-25.7533	44.3461	14.508	56.42	-41.1818	39.5891	-16.8293	21.9619	-1.612	7.57479	24.7845	19.5149	4.8763	-0.928512	17.9899	27.6522	-1.53785	11.8466
110	31.7306	18.1398	17.8287	-10.8939	-1.58137	39.6923	-27.6651	45.0844	14.508	56.42	-40.2952	39.4811	-16.07	20.3902	-0.944632	7.23143	25.3277	19.7244	4.89726	-0.980096	18.3897	27.5991	-0.91078	12.0578
111	31.1841	18.4767	17.3757	-10.7214	-1.41695	40.869	-28.1745	45.5374	14.508	56.42	-41.6428	40.2565	-16.8583	21.2349	-0.710892	7.13955	25.6485	20.1371	4.28147	-0.349804	17.5901	26.4981	-1.09294	11.687
112	31.4662	19.1167	17.6159	-11.0212	-1.6652	40.8932	-29.39	45.8904	16.12	58.032	-40.8529	40.5902	-16.0604	21.4928	0.045136	6.47702	26.4819	21.0124	5.38086	-0.952692	18.2172	27.9763	-1.3702	11.2888
113	31.4356	20.3966	17.1549	-10.5828	-2.58081	41.8282	-30.1525	45.8953	16.12	58.032	-41.6573	43.0243	-16.6004	22.5873	-1.44758	7.0654	25.7791	21.6717	4.56196	-0.2418	17.4789	27.7748	-1.2896	12.09
114	31.11	21.0866	16.1087	-9.88478	-1.8941	41.9958	-30.1267	46.0355	16.12	58.032	-41.8298	42.8486	-17.0405	21.4332	-2.26647	7.32009	26.5335	22.1344	5.62749	-1.3428	18.4413	27.7941	-3.13534	11.1679
115	30.3701	21.0108	15.3704	-10.5119	-1.89894	42.6471	-30.7973	46.5449	17.732	58.032	-40.5789	42.9904	-16.4214	21.6008	-2.12623	7.24755	25.7533	23.3514	4.38948	0.267592	16.473	27.8022	-1.12518	12.846
116	30.578	21.1462	15.4123	-9.85899	-2.18426	42.4698	-31.031	46.69	19.344	59.644	-41.1044	44.8684	-16.2683	22.8066	-2.30516	6.31259	25.9935	23.3998	5.07941	-0.610948	18.1318	28.152	-1.7458	12.5897
117	32.2803	21.6282	14.3968	-10.1733	-1.36053	42.7373	-32.0466	46.7238	17.732	59.644	-42.4117	44.9555	-17.5547	23.0355	-1.79254	4.91821	26.8898	24.1381	5.23739	-1.5185	17.408	26.8833	-2.63884	10.528
118	31.0729	22.7034	15.3672	-10.3361	-0.835016	43.9641	-32.7607	46.4337	17.732	61.256	-42.6084	46.316	-18.7121	23.9882	-1.02362	5.74194	27.728	24.5878	5.33894	-1.55719	19.1344	28.4711	-3.19498	13.0185
119	29.843	22.7808	13.4505	-9.97506	-1.09132	43.6562	-32.8961	46.0162	19.344	59.644	-41.7879	45.7066	-17.4515	23.6287	-1.04135	6.41737	27.9247	26.1321	4.5813	-1.09294	17.5418	27.7377	-1.20094	12.5075
120	28.8193	23.3756	12.0981	-10.7794	-1.41372	43.9367	-33.4554	46.5578	20.956	61.256	-40.0872	46.698	-16.6229	24.857	-1.61684	6.09014	28.0391	26.3336	5.10198	-1.59588	17.8722	28.8758	-2.67592	11.5613
121	31.0407	23.669	9.28351	-9.95732	-1.83929	44.5025	-33.6328	46.5513	19.344	61.256	-41.4494	46.5094	-17.2307	24.4669	-0.404612	6.53666	28.4776	27.0236	5.15195	-1.00428	18.351	27.7022	-1.87153	12.3108
122	30.6876	24.1123	10.3329	-10.0814	-1.84413	45.1811	-33.5651	46.7706	19.344	62.868	-41.8749	46.5626	-17.9464	24.2267	0.34658	6.13044	28.9564	27.6587	4.59259	-0.775372	17.5805	28.7033	-1.96986	12.3205
123	32.0852	24.151	8.08418	-10.7617	-2.46797	44.7733	-33.4474	47.6249	19.344	62.868	-42.5745	47.0446	-18.0528	24.9634	1.10422	6.19814	29.2159	28.6517	4.6748	-0.812448	17.5627	28.2132	-3.33362	13.6101
124	32.7397	24.8022	7.51192	-10.4119	-3.34006	45.6309	-34.4678	47.0768	19.344	64.48	-43.3999	48.6647	-18.3333	25.1311	1.13646	5.86446	29.6737	29.5254	4.71671	-2.01016	17.861	28.0536	-4.74412	12.0255
125	31.9515	25.9	6.43833	-10.4909	-3.40293	46.1387	-35.3818	47.7088	20.956	64.48	-42.8212	48.8662	-18.0028	25.5679	0.304668	6.61887	30.1492	29.9606	4.9295	-1.94085	17.2339	27.0252	-1.94246	13.0588
126	31.4001	25.7727	6.7575	-9.6446	-3.0354	46.4498	-35.9895	47.4847	20.956	64.48	-41.2914	48.9693	-17.221	25.6501	0.051584	6.04016	31.4066	30.1508	5.74517	-1.48304	17.5257	28.3261	-1.42178	14.5402
127	31.3889	27.0864	4.8634	-9.85416	-4.4862	46.6738	-36.1346	48.0344	20.956	64.48	-43.3854	49.2643	-19.178	24.8022	-1.15097	6.37224	31.6	30.8521	5.64684	-1.20094	19.1151	30.8069	-2.04079	14.1243
128	32.327	28.0681	3.922	-10.1975	-4.53133	46.9173	-36.2216	46.7077	19.344	64.48	-43.3692	49.7753	-19.157	25.5115	-1.48143	5.26479	31.7	30.9971	4.92788	-1.75224	19.7035	27.9069	-2.04885	13.7681
129	32.6382	27.9521	3.41744	-10.4651	-4.33789	47.6959	-35.4414	46.8689	20.956	64.48	-42.2086	49.6641	-17.8722	25.6179	-1.69905	5.7226	32.4238	30.9004	5.34378	-1.93762	18.7637	28.9273	-3.99131	11.5113
130	33.2765	28.7871	2.9822	-10.6489	-5.16646	48.1214	-36.4183	47.8861	22.568	64.48	-41.0657	49.6448	-17.7804	25.2665	-0.6851	5.89347	32.8187	31.2696	4.92144	-2.26808	18.2011	28.995	-1.01878	12.9589
131	33.4055	29.2868	3.57219	-11.3759	-5.03428	48.7694	-36.1539	46.9656	22.568	66.092	-41.1656	51.2729	-18.4945	25.8113	-0.344968	6.03855	32.0772	31.5726	4.79731	-1.24769	17.5321	29.0563	-1.76514	13.8761
132	32.5979	29.6076	1.31862	-11.2501	-5.13744	49.2305	-35.8057	47.6056	22.568	67.704	-41.8024	52.3626	-19.4278	26.4223	-0.651248	5.78547	32.2593	31.779	5.43566	-1.34763	18.0415	29.3706	-3.17886	13.7842
133	32.4625	29.8929	1.60716	-11.5258	-5.12294	49.1757	-36.8439	47.7781	22.568	66.092	-41.6025	53.3088	-19.9695	25.6888	-0.7657	5.34862	32.6511	31.7258	4.92788	-1.3428	18.1366	28.7307	-1.907	14.4532
134	32.3335	30.2621	2.30516	-10.6134	-5.54528	51.0827	-36.8213	47.6781	22.568	67.704	-42.0635	53.2331	-21.1962	26.1563	0.066092	5.37441	34.4452	32.5285	4.48136	-1.90216	17.8303	28.2326	-5.11488	14.9078
135	31.0133	30.7731	2.43573	-11.1421	-6.26262	51.2568	-37.4081	47.5153	22.568	67.704	-40.7417	53.462	-19.9082	26.1547	-0.541632	4.944	34.7418	32.4947	5.28736	-1.55236	19.236	28.6597	-4.98108	12.9637
136	29.9252	31.5517	1.98437	-11.155	-6.7027	51.7903	-37.5822	48.4632	22.568	67.704	-39.6745	55.4254	-18.5332	27.0542	-0.965588	5.79998	33.773	32.6623	5.90798	-1.59266	18.3494	29.8156	-5.92088	12.6623
137	30.3443	32.161	2.21166	-10.752	-7.62637	52.0692	-37.1502	47.7233	22.568	67.704	-39.6745	57.1905	-19.107	27.57	-0.801164	5.35345	32.8445	31.8273	4.53778	-1.17354	17.3129	31.1229	-4.74734	13.4908
138	30.6506	32.3222	1.4234	-11.579	-7.91492	52.5625	-37.6483	48.7356	22.568	67.704	-40.89	57.147	-20.0355	26.9107	-0.154752	5.59848	32.8606	32.7043	5.3599	-1.42017	18.6267	30.3523	-7.30075	12.7219
139	31.3034	32.5785	1.55074	-11.0938	-8.80797	52.5947	-36.7971	48.8742	24.18	67.704	-39.8809	58.3512	-18.6911	26.8785	-1.17998	5.63878	34.7015	32.9138	4.98753	-1.0478	18.3043	29.1998	-5.36635	13.6617
140	32.1675	33.6537	1.37826	-10.7117	-8.8789	54.3873	-37.4532	48.7872	24.18	69.316	-39.4182	58.9911	-20.1677	27.0735	-1.04941	5.37763	33.3587	33.7101	5.88058	-2.15363	16.6713	28.7774	-4.49587	13.9777
141	31.3131	33.6972	2.43896	-11.3227	-8.52264	54.8144	-37.6886	49.6544	24.18	70.928	-38.7347	60.7724	-19.2731	27.3573	-1.6249	5.72099	33.0573	33.5377	5.49208	-1.57492	17.4709	29.1643	-6.59308	13.6601
142	31.3695	35.082	2.2697	-10.9729	-7.57318	56.0218	-37.2356	49.6045	25.792	70.928	-37.3726	61.7847	-17.3242	27.7474	-0.946244	6.13366	32.988	34.1583	5.98052	-1.19288	18.2978	30.7102	-6.91548	13.5327
143	30.7586	35.4124	1.77159	-10.5376	-7.88268	57.5226	-37.6676	50.1525	24.18	70.928	-39.0604	62.1765	-18.5364	28.8419	-0.820508	5.75484	33.8069	33.47	4.59904	-1.22028	17.9786	27.9198	-4.90048	15.9346
144	29.6431	34.8031	1.7603	-10.7843	-8.72092	57.0825	-37.6466	50.209	24.18	70.928	-39.3908	62.5456	-18.3816	28.3938	0.818896	5.79353	34.3775	33.9503	5.69358	-1.91183	18.0205	29.4464	-6.75267	12.7396
145	28.526	34.6403	2.24552	-11.903	-9.42698	57.7515	-37.3694	51.8355	24.18	70.928	-39.5569	62.3522	-18.1834	28.6469	0.855972	5.76612	35.7832	34.363	5.12132	-1.03329	17.5547	29.4512	-4.37497	13.6988
146	27.9795	34.8788	3.8414	-10.8746	-9.12714	59.0363	-36.1362	53.7263	25.792	70.928	-38.0835	63.6643	-16.6923	29.506	-0.08866	5.50498	34.1164	34.3775	5.41793	-1.86831	18.5719	29.9381	-7.1057	14.4322
147	28.0939	35.04	2.34385	-9.7526	-10.4087	60.1212	-36.4054	57.687	24.18	72.54	-39.0088	65.2151	-17.2049	29.4883	-0.494884	5.66457	34.3775	34.284	5.06652	-1.5991	18.9829	29.5673	-6.54633	14.6853
148	28.7	34.8482	2.07948	-9.69296	-11.2163	61.1109	-35.7106	58.7832	24.18	72.54	-39.7326	66.5788	-19.2054	29.1708	0.697996	5.94022	33.8842	34.8369	5.36312	-0.78988	18.1108	28.779	-6.89291	11.6951
149	28.2213	36.0621	2.76458	-11.5435	-12.7219	62.0781	-35.5865	59.968	22.568	72.54	-41.2736	67.193	-19.876	28.447	1.06392	5.93216	34.3711	34.421	5.72744	-1.99727	18.6138	28.7726	-5.66457	13.8358
150	29.6044	37.2211	1.86025	-9.98473	-13.7729	63.3339	-34.9562	60.5886	24.18	72.54	-40.4402	68.6406	-18.9877	29.2352	1.38632	7.23949	34.6016	34.3888	5.78063	-1.75063	19.3343	28.9741	-8.66934	12.2915
151	28.0311	37.645	2.03757	-10.4893	-13.5069	63.9948	-34.7676	61.0706	24.18	74.152	-40.6691	69.848	-18.0125	30.1428	0.143468	6.38352	34.2566	34.7966	5.01332	-1.40083	19.423	30.3733	-5.76129	13.2184
152	27.4088	37.4161	3.59315	-11.1728	-13.9003	63.0727	-35.4189	60.932	25.792	74.152	-39.2103	70.8619	-16.6278	29.8462	0.614172	6.68496	34.4065	35.2383	5.94022	-0.736684	18.8249	29.1321	-7.84399	12.3705
153	26.9526	37.8884	1.07843	-11.5306	-14.5822	63.6273	-34.8998	61.3576	25.792	74.152	-39.9566	70.7281	-17.1275	29.2127	0.85436	6.51248	35.4559	34.8031	5.19548	-1.85864	19.1586	29.5705	-7.26206	12.4898
154	25.4454	38.2705	0.791492	-11.263	-16.2183	63.782	-35.3641	62.7439	25.792	74.152	-39.2941	71.331	-17.703	28.6485	0.166036	7.46517	34.3517	35.9057	5.87735	-0.622232	17.566	28.9322	-4.80537	13.4828
155	26.2176	38.7912	0.828568	-9.34154	-17.6143	65.7906	-34.9385	63.6321	25.792	75.764	-38.8073	72.1306	-16.6326	29.3497	-0.253084	6.63177	34.4098	34.9288	4.38948	-1.66681	19.2602	29.3094	-5.0101	15.7605
156	24.9376	38.8847	-0.775372	-10.7279	-18.1318	66.5224	-36.0234	64.0609	25.792	77.376	-37.7176	73.7909	-16.17	30.8037	0.033852	6.36418	35.0771	35.4092	4.1509	0.238576	18.0834	29.764	-5.32927	12.975
157	25.6518	39.9615	-4.36852	-12.2979	-19.0941	67.351	-35.6687	64.0303	25.792	78.988	-37.4822	74.7549	-16.0878	30.5426	-0.043524	6.60598	35.0175	35.9105	4.61193	-1.16225	17.7239	29.3964	-8.94338	16.5037
158	25.7307	40.3999	-8.21959	-11.126	-20.6578	68.186	-35.4817	64.4526	24.18	77.376	-38.3189	75.2127	-18.6686	29.2626	0.432016	5.76935	36.4779	36.0218	4.50715	-1.43468	17.8094	30.5684	-7.70375	15.5526
159	26.8543	40.0437	-9.81224	-11.7563	-21.9409	68.1022	-34.9933	65.4827	24.18	75.764	-39.1603	75.851	-19.1409	30.2298	1.09294	6.67368	37.6047	36.8906	3.5335	-0.190216	18.3865	29.1836	-5.08908	15.8766
160	27.2847	41.0931	-6.79942	-11.0132	-22.1021	68.5954	-35.119	66.4499	24.18	77.376	-38.6235	76.6538	-20.1436	29.3916	0.786656	5.58236	38.3511	36.8713	4.18959	-0.899496	18.7959	30.7715	-4.09126	13.2958
161	26.9446	41.5219	-13.4957	-11.1583	-23.7383	69.6271	-35.2915	67.7733	24.18	78.988	-37.2275	77.0568	-19.4085	30.4861	0.847912	6.6495	37.6821	37.1969	4.46524	-0.897884	18.9861	30.0622	-4.99398	14.8739
162	27.9021	42.3376	-11.8289	-13.3877	-23.8463	69.7964	-35.7364	69.4047	24.18	78.988	-37.026	77.9628	-18.5606	30.52	0.053196	7.01704	36.8487	36.3764	4.32983	-1.47498	19.3085	29.577	-7.8311	15.335
163	27.3959	42.0442	-10.4796	-11.5177	-25.7791	71.2585	-35.6381	69.0452	24.18	78.988	-37.7901	77.6952	-19.3118	29.7478	0.303056	6.36901	36.7713	35.7364	4.22344	-0.731848	19.1377	28.8693	-6.74461	16.4811
164	28.2858	43.1839	-14.2984	-11.4791	-25.3987	72.7705	-36.5182	69.9189	24.18	77.376	-37.5822	77.0617	-18.7218	29.6253	0.544856	6.36579	36.7004	35.9508	5.80159	-1.32184	20.5353	30.873	-7.66345	14.1114
165	28.9418	41.7298	-12.8154	-10.8842	-27.0526	72.3014	-36.1443	71.1714	24.18	78.988	-36.889	77.8257	-18.3478	29.6302	0.912392	6.11432	37.1888	37.1502	4.53939	-1.22028	18.97	28.484	-6.90742	15.5074
166	29.1111	43.0194	-11.4452	-10.7391	-28.2761	73.1123	-36.8713	71.302	24.18	78.988	-35.2238	79.3185	-17.7497	30.1089	0.615784	6.48991	37.9562	37.8288	5.40342	-0.963976	19.4101	30.9407	-3.6399	17.624
167	28.476	43.5659	-12.4076	-11.0938	-29.9913	74.2294	-36.9358	70.7039	24.18	78.988	-34.9449	80.5468	-17.5402	30.391	-0.061256	6.5286	37.9175	37.342	4.94884	-0.98332	19.2763	29.4109	-4.61838	15.6944
168	27.8989	43.7819	-13.7391	-11.7241	-30.5393	75.2933	-36.9648	72.0451	24.18	78.988	-35.2222	80.9095	-17.2968	31.6516	-0.207948	6.58502	37.0341	37.716	5.0504	-1.12195	18.9813	30.981	-7.30397	17.7207
169	28.0343	44.3171	-15.6251	-11.7047	-31.9031	75.5964	-36.507	73.5733	24.18	78.988	-34.5645	81.1013	-17.2436	31.3228	0.635128	6.51893	38.2979	38.6558	4.60871	-0.672204	19.1699	31.7709	-7.05734	16.5053
170	27.4379	45.0586	-17.9786	-11.4436	-33.7456	76.4733	-36.8842	74.8871	24.18	78.988	-34.9659	82.3877	-18.3607	32.0498	0.74152	7.43777	38.4913	37.8514	4.83278	-0.69316	19.4568	31.4147	-6.01115	17.5321
171	27.6103	45.4955	-18.6428	-11.7386	-35.0997	77.7016	-36.0846	76.0429	24.18	78.988	-33.9971	81.7719	-17.4209	31.8499	0.401388	6.29808	39.4182	38.8379	3.98486	-0.436852	17.5982	30.0267	-6.85745	17.8658
172	27.6426	46.7432	-20.7593	-11.6354	-35.7122	78.8171	-36.4457	76.462	24.18	78.988	-34.3292	82.9003	-16.8406	32.5076	0.581932	7.23143	39.7084	38.9508	5.17774	-0.49166	20.4514	33.0524	-8.46945	17.221
173	27.5233	46.6335	-15.6912	-10.9261	-37.1953	80.1035	-35.9831	77.3841	22.568	80.6	-34.3098	83.9804	-18.2575	32.7172	0.512616	6.96706	40.2113	39.0443	3.70921	0.07254	19.078	30.7473	-8.24538	16.71
174	28.555	47.8087	-18.8846	-10.1201	-38.8299	81.7155	-35.1577	77.4421	22.568	78.988	-35.7719	84.2206	-19.1683	33.0105	0.77376	7.08796	40.869	39.5633	5.33572	-0.380432	19.8018	31.3099	-5.95634	17.6804
175	28.9918	48.0779	-17.0243	-10.3958	-39.7439	82.5683	-35.2851	78.1772	20.956	78.988	-35.9266	84.3866	-18.9249	33.7472	0.996216	7.37006	40.5499	40.0131	4.71671	-0.756028	19.8099	31.3598	-8.71447	15.3817
176	27.5249	48.2117	-15.2656	-10.1959	-41.6186	85.2716	-35.5414	78.4174	20.956	78.988	-34.1357	86.0212	-19.4633	33.1846	1.13001	7.79886	40.5918	39.9889	5.68069	-0.938184	19.8824	33.1508	-5.05684	18.048
177	27.0606	48.8484	-16.2925	-9.3093	-43.2741	86.9577	-35.7945	78.9799	22.568	78.988	-31.787	86.695	-17.0114	34.1438	0.4433	7.67312	39.5456	39.9857	4.95045	0.058032	20.9608	31.6871	-5.06168	16.5907
178	25.8291	50.1171	-14.0421	-10.5409	-44.2897	88.8696	-35.7783	79.1153	24.18	78.988	-31.1777	86.5531	-16.9163	34.4436	0.657696	7.37329	39.6165	39.8196	3.80432	-0.035464	21.0044	31.9063	-8.89502	19.3569
179	25.7581	50.2767	-12.6494	-9.8735	-45.5132	90.8104	-35.8847	79.067	22.568	78.988	-31.2712	86.0163	-18.3591	34.6209	0.936572	6.94288	39.4198	39.4827	5.3599	-0.001612	20.2596	31.7661	-7.49258	17.9254
180	25.5083	50.9859	-11.3243	-9.75582	-47.8764	92.4933	-35.3995	79.8359	24.18	78.988	-31.0294	86.0453	-19.2698	34.6822	2.46475	7.18791	40.8062	39.0862	4.62644	-0.730236	20.1161	32.5269	-7.99391	17.3016
181	25.9403	50.6297	-12.177	-9.161	-48.8662	94.2553	-34.6064	79.391	25.792	77.376	-31.0084	86.9916	-17.5273	36.0814	2.81616	7.2669	40.0888	40.595	4.45879	0.706056	21.3864	32.0321	-7.29591	19.5519
182	24.6878	51.9644	-11.5258	-9.38184	-50.5523	95.4094	-34.4565	80.2566	24.18	78.988	-28.8081	87.1093	-17.0018	36.2958	2.60822	6.85584	40.4822	41.4058	4.68286	-0.240188	20.1371	31.347	-9.564	17.1388
183	25.1811	52.0321	-9.14488	-8.73382	-52.3078	98.3465	-35.5091	80.1422	27.404	78.988	-28.6597	87.617	-17.4725	36.3877	2.78554	6.82037	40.2581	40.6256	5.12938	0.841464	20.4047	32.5285	-9.13843	18.2382
184	27.4056	52.6447	-10.075	-8.09385	-53.5635	99.7828	-35.4608	80.8563	25.792	78.988	-29.2256	88.0088	-17.3129	37.3774	3.8156	7.78918	42.7228	40.8449	5.20998	-0.046748	19.7776	32.0111	-9.33993	17.9851
185	26.6447	52.8446	-10.5489	-7.94232	-54.6468	101.714	-37.0776	81.14	24.18	78.988	-28.0488	88.5891	-17.3983	37.6628	3.19015	7.33621	42.7776	41.4316	3.41583	1.51689	19.4697	31.8515	-9.29318	17.5321
186	26.0951	53.6635	-9.58979	-7.79563	-55.5785	103.226	-36.8165	81.0127	24.18	78.988	-29.7446	88.1893	-17.9561	38.3495	1.79416	7.5361	41.8669	40.2903	5.00204	1.31862	19.6857	33.0605	-9.32381	18.2511
187	25.4599	54.0407	-10.4409	-6.97512	-56.8697	105.341	-35.68	81.2545	24.18	78.988	-29.2739	87.6138	-18.7862	37.8739	2.72428	6.82521	41.854	40.3742	4.22344	1.42178	20.4547	33.3136	-9.23192	19.2634
188	25.3471	54.0713	-11.1002	-7.60058	-57.795	106.444	-36.1104	81.3061	24.18	78.988	-29.3674	87.9346	-18.5348	37.8014	2.1891	8.13254	42.2408	40.6675	4.0703	1.35569	20.4434	31.2889	-7.68763	17.7787
189	24.8683	54.3437	-10.212	-7.08958	-59.7182	108.215	-36.1797	81.8154	24.18	80.6	-29.735	88.0587	-19.2618	36.9728	2.61628	6.84778	41.185	41.5638	4.74895	1.03813	20.7819	32.5318	-9.14488	19.2199
190	23.8415	54.9563	-8.758	-7.47162	-61.2076	109.75	-35.0803	82.1556	24.18	80.6	-31.1729	87.6525	-20.5643	37.566	3.09665	7.61025	41.9733	41.5912	5.60492	1.45402	19.963	32.4463	-8.35016	19.7277
191	24.2961	55.0047	-9.2287	-7.8859	-62.2087	110.693	-35.4753	82.2862	24.18	80.6	-32.7429	86.5708	-20.0613	37.7724	2.79843	7.66184	43.171	41.5106	5.73872	0.602888	19.4601	33.0605	-6.88808	18.9749
192	26.166	54.484	-10.1895	-6.99447	-64.7234	113.117	-35.7606	83.637	22.568	78.988	-33.0267	86.9497	-21.7201	37.9449	2.15847	7.05734	42.8873	41.5203	4.81343	1.06553	20.6546	34.1083	-7.14922	20.9963
193	24.9924	55.3609	-9.05944	-6.85261	-64.4945	115.208	-36.4892	83.0825	20.956	78.988	-33.9116	87.0673	-21.1849	38.4929	1.5588	7.18307	42.5616	41.5267	2.81939	2.72589	20.7738	34.0906	-9.03687	18.0463
194	24.6862	55.664	-8.16156	-6.75267	-65.3424	117.249	-36.6117	83.874	22.568	80.6	-34.197	87.285	-20.5482	38.9314	1.21545	7.15244	42.6052	41.7782	3.91716	2.38415	19.3682	34.3646	-9.2158	18.322
195	24.151	56.0122	-6.9316	-6.64144	-66.113	118.281	-36.2361	84.3898	24.18	78.988	-34.305	86.7675	-19.7792	38.6445	0.859196	7.49902	42.265	41.8765	4.86663	1.45564	21.488	33.6908	-9.07234	19.6245
196	23.827	55.9219	-1.57331	-7.21531	-67.3171	120.508	-36.0733	85.2845	20.956	78.988	-35.7026	86.3726	-20.7577	39.3505	1.36214	7.66828	42.3311	42.1973	5.13906	1.06553	20.7126	34.126	-8.23732	20.3708
197	24.6668	56.3926	0.752804	-7.98424	-67.438	121.741	-35.2835	84.3092	20.956	80.6	-35.8396	87.0609	-22.1666	39.3908	2.05691	6.80748	42.6632	41.4913	5.53883	0.348192	20.9205	33.0428	-9.75421	18.8975
198	24.0269	56.4539	1.90216	-8.16478	-68.2988	122.525	-34.7644	84.8573	22.568	78.988	-36.7004	86.1727	-22.7276	39.4859	2.32934	7.19436	42.9131	41.941	5.36151	1.05102	21.8619	33.7214	-8.2744	18.5251
199	24.6572	56.2491	2.99187	-7.39102	-69.1951	124.872	-35.2399	85.2345	22.568	80.6	-37.5677	86.861	-22.41	40.7497	1.51689	8.53393	41.5122	41.9878	5.1713	1.39922	21.2365	34.3969	-9.41408	20.0081
200	24.0591	56.7714	3.52544	-7.10731	-68.639	126.099	-35.8767	86.0357	20.956	80.6	-36.9196	86.8062	-22.4858	40.6772	1.26058	8.08257	41.127	42.1183	3.67858	1.78126	21.7539	33.881	-9.90896	20.258
201	22.8807	56.7875	4.836	-6.8107	-67.9522	127.579	-36.5473	86.005	20.956	80.6	-38.0593	85.8164	-24.2267	40.4644	0.99944	7.91008	39.7406	41.9958	4.04773	1.52656	20.5337	34.176	-10.162	18.7056
202	22.0054	57.0132	3.70276	-5.86284	-69.1919	129.181	-35.6881	86.2968	20.956	82.212	-38.3737	85.2684	-23.4159	40.2839	1.87798	7.46517	39.7326	42.5536	5.18742	1.96986	23.1	34.7757	-10.2475	17.9674
203	23.8447	57.6161	2.77909	-6.25295	-70.7861	130.09	-35.3721	85.7939	22.568	80.6	-38.5784	85.7794	-23.6787	40.8787	2.44863	7.40714	40.5112	41.9136	4.45879	1.51528	21.6669	35.3689	-11.3598	20.5272
204	24.5217	57.1712	3.13695	-6.25617	-71.2069	131.626	-35.5253	86.2227	24.18	80.6	-37.1743	85.752	-22.4584	41.1463	1.45402	7.31203	40.3548	41.6283	4.30082	1.85864	21.1946	35.2029	-10.7262	21.8652
205	25.7114	57.0455	1.76514	-5.81771	-72.3659	133.23	-35.3866	86.1082	24.18	80.6	-37.0808	85.5762	-22.5599	41.5445	2.26808	8.06322	40.7497	42.1054	3.56413	2.45024	23.9721	34.4194	-8.24216	21.8555
206	26.324	57.5355	2.82906	-5.38569	-71.6663	134.252	-34.9643	86.5451	22.568	80.6	-37.5048	86.7901	-22.7647	42.5262	1.71839	7.9117	40.1984	42.4182	5.08425	1.56364	22.734	36.3893	-11.0551	21.5847
207	25.5695	58.306	1.80705	-5.38247	-71.8001	135.107	-34.5516	86.6482	22.568	78.988	-38.264	85.9631	-23.2918	42.1522	1.9473	9.02075	39.9518	42.5004	4.50393	2.78715	22.5422	35.6268	-11.6386	22.0925
208	24.2509	58.7606	1.44758	-5.1858	-71.9839	136.051	-34.5645	86.7095	22.568	80.6	-38.5526	85.8084	-23.7061	42.1312	1.77965	9.3899	40.7078	41.9523	3.87847	2.78554	23.1854	35.622	-10.8197	22.323
209	22.7308	58.5414	1.6797	-5.18903	-71.7437	135.906	-34.168	86.7224	20.956	80.6	-39.1523	85.6053	-23.2612	42.8824	2.42445	8.64354	41.085	42.7631	3.34168	2.67431	22.3681	35.9863	-11.7918	24.1881
210	22.3472	59.6263	2.01984	-5.02944	-72.3256	136.164	-34.1196	86.8401	24.18	80.6	-38.5961	85.6617	-22.136	43.4918	2.11333	8.70158	40.5757	42.1715	4.61032	2.36319	23.8915	36.104	-10.3474	21.7072
211	22.3423	59.7842	2.4986	-2.65496	-73.8667	136.385	-34.1776	86.8014	22.568	80.6	-39.5182	85.486	-22.6937	44.1172	1.4105	8.44849	41.6879	42.2908	3.65924	2.28904	20.8609	35.5204	-11.421	21.891
212	21.1801	59.881	1.4379	-1.83607	-74.7549	136.196	-33.6586	86.7498	22.568	80.6	-41.1173	85.0717	-24.1316	44.3058	1.70711	7.38135	41.7556	41.6976	4.37819	3.70276	23.5932	34.0616	-10.6005	23.2144
213	20.7706	60.5306	0.293384	-1.88443	-76.1186	136.399	-33.8069	87.4139	20.956	80.6	-41.933	85.3828	-24.4041	45.2392	0.473928	8.18251	41.7718	41.6976	5.0778	2.64368	22.6631	36.6263	-12.7138	23.0161
214	20.5208	59.7375	-0.219232	-0.204724	-76.7183	137.018	-32.5431	86.1292	22.568	80.6	-42.5213	84.8105	-25.3826	44.9313	1.47176	8.19057	42.2473	42.099	4.62644	2.11172	23.6384	36.2136	-13.6407	22.7179
215	21.2317	60.4887	-1.51206	0.190216	-78.2965	137.312	-34.3533	85.7665	24.18	80.6	-41.8104	85.1329	-25.1972	46.1048	1.95213	8.9192	41.3301	42.4262	4.96012	2.51794	23.0161	35.5075	-14.4822	24.3396
216	21.6621	60.745	-1.67648	1.66036	-79.5393	136.864	-33.4829	87.1947	22.568	80.6	-42.2457	85.0394	-25.094	44.8233	2.30516	8.20347	41.4929	42.6181	5.17613	2.6872	23.3095	37.1695	-13.7149	24.0672
217	21.7668	60.1905	-0.859196	2.3648	-79.4184	136.996	-33.8004	87.0383	22.568	78.988	-44.5654	85.6262	-27.0687	45.9517	2.85808	7.74727	41.0383	41.7734	3.58992	3.24334	22.8823	36.6472	-12.5252	22.2182
218	21.7136	60.3017	-0.988156	2.02951	-80.7564	135.903	-34.1293	87.7831	22.568	78.988	-46.3224	85.6971	-28.5743	45.4004	1.67326	8.14544	41.5574	42.4617	3.34651	2.5389	22.352	35.551	-10.6199	22.7969
219	23.1596	62.0443	-1.60555	2.42928	-81.0659	135.935	-33.7633	87.3688	22.568	78.988	-46.6271	85.307	-27.6232	45.0828	1.71678	9.70263	40.8723	42.61	4.57002	2.60983	22.6696	36.997	-13.5327	23.1564
220	24.6169	61.1899	-2.50505	3.43356	-82.3684	135.519	-34.7563	87.0399	22.568	78.988	-46.9527	86.0598	-28.0536	46.0307	0.367536	9.27061	39.6681	41.97	5.07619	2.62917	21.4735	36.9325	-14.0002	23.5304
221	24.2993	61.7847	-0.904332	3.75596	-82.0959	135.142	-33.9729	88.1812	20.956	80.6	-48.3971	85.5924	-31.0149	45.0312	1.36214	8.60002	40.3064	41.9942	5.68552	2.9693	22.3971	38.0593	-13.3054	22.9629
222	22.5035	62.6617	-0.631904	5.08102	-82.3071	133.717	-34.0632	87.5832	19.344	82.212	-49.3288	84.8379	-30.499	45.0167	1.01395	8.83537	41.0802	41.7024	4.48297	2.62434	22.8533	37.8481	-14.263	25.2939
223	21.899	61.7299	-0.559364	4.65546	-84.7557	131.712	-34.5855	86.9835	19.344	80.6	-51.2132	84.4156	-31.3179	46.0855	1.32345	9.96861	41.5235	43.1903	3.18531	3.50771	21.4767	39.4473	-12.6687	22.9017
224	21.9474	62.976	-1.79254	5.61943	-86.7949	130.99	-33.7053	87.4961	19.344	78.988	-51.85	85.1007	-31.1648	45.7824	1.71194	10.1717	42.2457	42.8292	5.00204	4.37819	21.9264	36.9164	-13.6536	24.6523
225	21.7475	62.8986	-2.65013	5.26318	-88.7293	130.195	-32.8058	86.9932	20.956	80.6	-51.289	86.3307	-30.1089	46.7802	1.6926	9.74938	42.3779	42.041	6.38997	3.06441	20.7996	37.3549	-13.4392	25.1182
226	21.4976	62.8503	-2.45185	5.93538	-89.7271	127.437	-33.7101	87.8492	20.956	78.988	-51.0327	86.5386	-29.4867	45.7663	0.06448	8.02937	42.2102	42.9066	5.20676	4.58775	22.1134	39.9905	-13.8503	25.3584
227	21.5105	63.8481	-2.929	6.14172	-91.3956	125.643	-33.2797	88.0845	20.956	78.988	-52.4351	87.7847	-30.0944	45.4423	1.35086	9.23837	42.0071	42.1828	4.93594	3.48031	21.8877	37.0276	-13.2506	25.4793
228	23.1145	63.4145	-2.47603	6.47863	-91.6922	124.924	-33.5328	87.3575	19.344	80.6	-53.354	88.336	-30.9585	44.5718	0.422344	9.05944	41.4429	42.3875	5.00848	4.46685	22.7534	38.4285	-14.6176	25.331
229	21.2607	63.2484	-2.04885	7.03477	-91.5181	123.291	-33.3313	88.4488	20.956	78.988	-54.1293	88.9631	-31.6822	45.007	0.41106	9.49629	41.2124	42.2151	5.18258	3.69148	20.9093	38.3027	-11.0664	24.2622
230	20.6046	63.7111	-3.11761	6.87034	-92.5336	122.133	-33.428	88.1957	20.956	80.6	-53.6619	90.38	-30.4039	45.2295	1.18482	9.63815	41.5864	41.9088	4.84728	4.2041	21.7781	37.0615	-15.6396	23.4062
231	18.862	63.2259	-2.0424	7.07668	-92.8109	124.537	-34.255	87.8588	20.956	78.988	-55.2191	90.2075	-32.024	44.3413	0.925288	8.7177	41.2285	42.5778	5.74839	3.76241	21.7378	38.5526	-15.9249	24.9183
232	19.6471	63.1388	-2.77909	7.37006	-94.3455	125.178	-33.9503	88.1071	20.956	80.6	-56.3894	91.6229	-32.9654	45.6567	1.4105	9.76227	41.2059	42.1328	5.19064	3.62216	22.913	37.6853	-13.5505	23.4739
233	19.0409	64.2495	-3.23528	7.67473	-97.1778	125.122	-33.4071	89.6788	19.344	80.6	-57.7354	93.122	-33.5892	46.1354	1.90861	8.463	40.5611	41.8346	5.8709	4.71671	23.1354	37.4726	-16.9953	23.7093
234	19.2473	64.4993	-2.71461	8.23248	-99.412	124.917	-33.3684	89.2258	19.344	78.988	-58.9009	93.388	-33.9519	45.8404	2.90644	10.3764	40.969	41.8927	5.37602	3.83172	22.7115	38.4575	-15.4833	25.9322
235	20.0871	63.7723	-2.35513	8.77412	-100.874	126.041	-32.427	87.9362	19.344	78.988	-58.8509	93.8168	-32.8606	45.9017	3.55607	10.1234	41.0673	41.7186	6.40286	4.62483	22.8888	39.0765	-17.6466	25.2584
236	20.1742	64.0448	-1.72162	8.29858	-101.393	124.874	-32.1433	88.9195	20.956	80.6	-59.2877	94.5003	-33.5022	46.0693	1.5846	8.49846	40.3596	41.9088	3.92683	5.17291	22.0022	39.1103	-15.148	25.007
237	20.042	62.781	-1.209	8.42109	-102.13	125.249	-32.4802	87.8895	20.956	80.6	-59.3506	94.6454	-32.8429	47.2961	1.72323	9.42375	40.1952	41.4413	5.75968	4.85857	22.3278	38.2979	-17.7417	26.2385
238	18.8137	63.9013	-0.73346	8.36144	-102.815	125.235	-32.4189	88.8164	22.568	78.988	-59.2329	95.1064	-32.8397	47.2864	1.12034	8.99496	40.6546	41.7427	6.18686	5.21321	22.4052	38.3817	-14.7192	24.396
239	19.7277	65.3876	-0.098332	8.84343	-103.012	125.646	-32.7784	88.8196	22.568	80.6	-59.0814	95.3982	-32.2061	47.4057	1.93762	9.13037	41.4187	42.5326	4.77636	4.89564	23.0822	38.1931	-13.5505	24.5024
240	18.4638	65.1441	-0.046748	9.51886	-103.881	125.915	-33.4506	89.3951	22.568	80.6	-59.889	95.7899	-33.5763	47.5685	1.57815	10.2926	41.883	42.0103	5.86768	4.5668	22.2633	40.2774	-15.8282	26.8704
241	18.2446	65.0442	-0.012896	9.94926	-104.18	126.84	-33.5892	89.1372	20.956	80.6	-60.9304	96.3057	-33.831	48.3261	1.31056	10.5457	41.7105	42.1054	5.8709	5.84511	22.6309	40.6611	-16.1168	24.8071
242	18.2736	64.4703	-0.138632	10.5699	-105.46	127.383	-32.6317	89.2693	20.956	80.6	-61.0255	96.7071	-33.6457	48.8613	1.02523	10.1105	42.4762	42.8018	5.75162	5.87574	23.7383	39.5939	-15.372	24.9457
243	18.8378	67.1301	0.02418	10.989	-106.566	127.055	-33.5618	90.3316	20.956	80.6	-60.99	96.9328	-33.1459	49.0241	2.01016	10.154	43.3241	42.3714	5.33733	5.88541	22.6405	39.2055	-16.0055	24.6507
244	20.4917	66.4337	0.069316	12.1706	-107.844	127.58	-31.8434	88.531	20.956	80.6	-61.6848	97.7823	-33.7392	48.6453	1.97309	10.4425	42.9163	42.5504	7.42004	5.20676	23.4159	40.6837	-16.3747	25.7614
245	21.625	67.1591	-0.984932	12.0723	-109.552	127.242	-31.8096	90.0963	19.344	80.6	-64.0109	98.2369	-35.9911	49.6367	2.53084	10.0379	42.4585	43.0227	5.17774	4.63128	22.0683	40.321	-15.0851	25.4406
246	21.251	66.9883	-1.55074	12.5962	-110.269	128.277	-31.492	90.5251	19.344	80.6	-65.2215	97.9032	-36.947	49.1289	2.99671	10.9374	42.7164	43.3805	6.73171	5.06974	22.8533	41.2801	-16.7358	25.0876
247	23.4836	66.5595	-0.117676	12.709	-110.74	127.875	-30.3491	89.4628	19.344	80.6	-65.6052	96.5749	-35.9476	48.6663	3.48514	11.342	42.5697	42.7373	6.74461	4.66835	21.5379	39.9566	-15.854	25.8678
248	22.3391	67.0802	0.09672	13.2377	-111.115	128.02	-30.8795	89.9786	20.956	80.6	-66.0195	96.9682	-35.8573	49.7221	2.8081	10.7456	43.3999	42.4456	5.87252	5.41148	22.136	40.5257	-15.0867	25.2858
249	21.6282	67.0737	0.519064	14.1824	-111.644	127.994	-30.7296	90.9539	20.956	80.6	-65.5262	96.749	-35.7268	49.3756	1.86831	11.0841	42.9743	42.5584	3.87525	5.36474	22.8082	41.3978	-15.8492	25.2214
250	20.3144	66.7529	0.204724	15.0045	-112.347	128.61	-32.211	89.084	20.956	80.6	-66.1807	97.0456	-36.4231	49.9865	1.65875	11.1357	42.0426	41.891	5.1713	5.48564	22.0538	44.0447	-14.7643	23.1306
251	21.4557	67.7733	-0.610948	14.6998	-113.923	128.048	-31.5356	90.0753	20.956	80.6	-66.5692	97.4244	-37.0921	49.9462	1.63134	11.3904	42.8873	42.1103	6.743	5.31315	22.1392	42.7696	-16.1796	26.8317
252	21.812	69.1467	-0.011284	16.2038	-114.724	129.424	-30.6312	89.6949	20.956	80.6	-66.8367	98.0467	-36.752	50.7748	1.9215	11.421	43.1968	41.1673	5.62588	5.70809	21.4299	42.9517	-17.113	26.6044
253	20.3048	68.7953	0.522288	15.8347	-115.053	128.992	-31.376	89.3628	20.956	80.6	-67.8152	97.6501	-37.4597	51.4405	2.93384	11.3694	44.2204	41.1624	5.57107	5.35506	22.5003	43.1968	-16.041	24.6233
254	21.4041	69.2402	0.377208	16.2619	-114.931	129.245	-30.1089	89.9947	20.956	80.6	-67.9168	97.5679	-37.076	51.5195	1.83929	11.6096	42.9808	42.3617	4.93111	4.9295	21.5927	44.7959	-13.8503	25.9371
255	21.9667	68.0457	0.530348	16.444	-115.526	129.771	-29.4271	89.4966	22.568	80.6	-67.7669	97.576	-37.5048	51.6017	0.780208	11.421	43.1049	42.689	7.4958	5.20192	22.0522	44.8184	-15.5542	27.8134
256	21.7007	68.6309	0.75764	16.0346	-115.714	129.629	-28.6968	89.9609	20.956	78.988	-69.4192	98.2353	-38.6896	52.9993	1.21867	11.9852	42.2876	42.3972	6.16429	5.99503	22.2311	46.914	-16.3263	26.029
257	19.6583	68.057	1.15419	17.0824	-115.389	130.675	-28.4131	92.8238	19.344	80.6	-70.4041	98.1063	-39.7761	52.2481	0.875316	12.1045	42.1409	42.1248	6.23038	6.75106	22.1263	44.6089	-16.1619	26.4852
258	19.9275	69.9914	0.836628	16.7148	-115.877	130.121	-28.0827	93.1285	20.956	80.6	-69.9914	98.1128	-38.9169	52.8946	2.51794	12.2125	43.3773	42.2505	6.39964	6.6898	22.1698	46.8205	-15.5864	25.792
259	18.7637	70.1027	1.3976	17.7078	-116.116	131.629	-28.3083	94.626	20.956	82.212	-70.3606	98.4739	-39.3392	53.3411	1.15097	11.2018	42.6084	41.6315	6.62693	5.93216	20.8609	45.921	-13.8503	26.3143
260	17.6869	70.8087	0.833404	18.4123	-117.226	132.448	-27.7425	94.8565	20.956	78.988	-71.0038	97.5067	-40.163	52.606	1.7603	11.8901	43.2306	42.5084	6.65111	5.642	21.7539	46.1354	-17.1243	26.8317
261	19.0619	69.3482	0.66898	18.3687	-117.728	132.556	-27.5233	93.9973	20.956	80.6	-70.5395	98.6721	-40.35	53.6603	2.12139	12.73	42.8437	43.0323	7.2008	5.60492	22.6889	46.0452	-17.3032	25.41
262	20.8303	68.8663	0.53196	18.6218	-118.524	133.901	-27.778	95.2321	19.344	78.988	-70.8232	99.1122	-40.948	53.6361	1.5314	12.6623	42.1377	42.1087	6.22554	6.11915	21.6169	47.7603	-16.5488	26.0016
263	21.92	69.0387	-0.340132	19.9163	-118.948	136.046	-27.4878	95.4675	20.956	82.212	-71.2423	98.872	-41.4365	53.6877	1.99727	13.436	41.7331	41.9152	7.60703	6.59147	22.1618	47.0188	-16.3908	25.8113
264	23.7012	69.0839	-0.98332	19.2441	-119.533	136.106	-26.5899	94.7614	20.956	80.6	-70.7152	99.5007	-41.048	53.9988	3.29976	13.4602	40.5515	42.4149	5.88702	6.71559	22.3455	48.5631	-17.6143	24.9844
265	23.1225	70.172	0.456196	19.3746	-118.161	135.518	-26.1483	95.5803	20.956	80.6	-70.4928	99.3991	-40.1872	53.6119	4.00421	13.4328	40.3435	42.3795	7.00736	5.75968	22.0828	47.3557	-16.0491	25.0021
266	21.3912	72.1515	-0.043524	19.4746	-117.689	135.239	-26.8414	94.9774	20.956	80.6	-70.2574	100.104	-40.5934	53.6909	3.85429	13.6649	41.3172	42.2554	6.35612	6.01437	22.5648	46.1645	-17.7949	25.2036
267	21.4525	71.8388	-0.380432	19.618	-117.997	134.152	-27.0236	95.2628	20.956	80.6	-70.8329	99.7167	-42.5826	52.0305	3.67214	14.0308	40.1324	42.0361	7.38941	5.50337	21.3042	47.5508	-17.6224	26.835
268	20.1806	72.1709	-0.58032	20.7851	-118.34	134.56	-27.0945	96.4298	19.344	80.6	-71.3068	100.323	-42.5745	52.369	2.27776	14.2404	39.8938	41.9749	6.63983	5.98052	21.4396	46.9366	-17.1904	25.6921
269	21.8813	71.4455	-0.406224	19.9969	-118.879	134.07	-26.0419	95.7286	19.344	82.212	-71.1972	100.773	-42.3617	52.6205	2.84034	14.724	39.5037	41.459	8.09385	6.98157	21.7991	46.906	-15.5703	26.9865
270	22.2263	71.4213	-0.809224	20.7319	-118.113	134.347	-25.7839	96.1784	19.344	80.6	-70.3606	99.9875	-41.596	52.0789	2.58081	14.3935	38.5429	41.4397	5.99825	6.72526	20.4869	47.4476	-15.3962	25.6888
271	19.56	71.281	0.299832	21.0173	-118.316	134.238	-26.9027	95.511	20.956	78.988	-69.7303	99.9682	-41.0415	50.8731	3.19982	14.5451	39.3941	42.1264	5.80804	6.0176	21.0705	48.4825	-16.5214	25.9355
272	19.3392	71.4632	0.465868	20.8867	-117.974	134.126	-28.1729	95.3498	20.956	80.6	-69.7383	99.6587	-40.358	50.7167	2.81778	14.6998	39.6375	42.2134	6.01437	6.2594	20.819	49.3256	-16.2006	26.0612
273	19.6728	71.7453	0.8866	20.8754	-117.845	133.606	-28.2213	95.7383	19.344	80.6	-70.0301	100.914	-40.0324	52.095	0.928512	13.976	39.9454	42.0361	6.06757	6.60759	21.201	49.0967	-16.3795	26.2047
274	19.6986	72.3514	-0.364312	21.122	-118.996	134.228	-29.0112	95.8495	20.956	80.6	-69.2338	99.9392	-39.4408	51.6066	2.14557	14.4967	39.22	42.7309	6.78007	6.55762	20.6288	48.8146	-16.1152	26.7995
275	20.5997	72.4481	-0.2015	21.4525	-119.203	134.247	-28.879	95.5062	20.956	80.6	-68.215	100.565	-36.918	53.0977	2.38737	15.933	38.7476	42.1135	5.51788	6.82682	20.6126	48.5712	-16.0797	27.1477
276	20.5594	71.7807	-0.106392	20.2499	-119.609	133.25	-29.2449	96.2042	20.956	82.212	-67.2833	99.8924	-36.8229	52.008	3.30621	14.7224	39.0281	42.768	5.9241	6.8639	21.1446	48.8726	-16.5423	26.7237
277	20.4579	71.6341	-0.33046	21.1317	-119.348	134.381	-28.6259	97.2874	19.344	80.6	-67.9136	99.6313	-36.1701	51.7242	3.56574	15.5074	38.9604	43.2306	7.43454	6.77362	20.8077	48.8903	-15.3462	27.08
278	20.5063	72.7093	0.204724	21.2381	-119.628	134.184	-29.6092	95.424	16.12	80.6	-68.2343	100.155	-35.4898	52.6205	2.9951	14.8223	39.6665	43.0388	6.23522	6.86067	20.6159	49.8769	-15.3978	27.0477
279	21.0076	72.9237	0.61256	21.8507	-120.826	134.173	-29.124	95.5352	16.12	82.212	-68.4181	100.208	-36.104	52.7027	2.96124	15.1931	39.0475	42.7519	6.60114	6.6769	20.9657	50.2074	-16.394	27.6313
280	20.0855	72.6641	1.35086	20.9544	-120.52	133.673	-29.0015	94.871	16.12	82.212	-68.2489	100.204	-36.2893	52.3271	3.14824	15.4091	39.0991	42.66	6.08208	7.59736	19.984	51.5937	-17.0211	27.2492
281	19.4375	74.0005	0.95108	21.0156	-121.575	133.201	-28.9902	95.3804	17.732	80.6	-67.6008	100.621	-36.9712	51.3777	1.5991	15.0722	38.796	43.5256	5.82093	7.1331	19.7663	52.0902	-16.9067	27.1896
282	19.265	73.9489	0.506168	20.9093	-121.16	133.034	-30.0928	95.6109	16.12	82.212	-68.5132	101.264	-36.5311	52.548	2.78876	15.4268	38.8556	43.4257	6.153	7.11859	19.8099	52.7366	-16.9115	27.246
283	18.1253	73.0478	-1.49271	20.8544	-122.101	133.264	-28.7468	95.5868	20.956	80.6	-67.4364	100.721	-36.1572	52.1224	1.3428	14.9207	37.4951	43.5256	6.41254	7.90041	20.2113	52.8317	-16.8341	26.5996
284	18.5815	73.886	-1.03813	21.841	-121.087	134.736	-28.8145	94.5905	19.344	82.212	-67.7314	99.8344	-35.3447	51.9854	1.5314	16.0055	38.1077	44.1124	6.77201	7.40392	18.7782	54.3115	-17.308	26.5303
285	18.0238	73.2976	-0.859196	21.1817	-121.446	133.627	-28.7742	96.0285	22.568	80.6	-67.6024	100.126	-35.0691	52.5222	1.76514	16.5294	38.2205	43.69	6.11593	7.0396	18.9942	54.9885	-17.3387	26.5932
286	17.5724	74.476	-1.25736	21.4573	-121.833	134.172	-28.0133	96.0929	22.568	80.6	-68.2021	100.155	-36.3925	53.3411	1.29927	16.6923	37.608	43.8819	6.5286	7.90847	17.8755	56.1105	-17.7916	26.8898
287	18.2994	74.7291	0.417508	22.0844	-122.605	134.028	-29.074	96.3041	20.956	78.988	-67.8555	101.235	-37.1727	54.2406	1.58782	17.4225	37.4435	44.0705	6.49314	7.13149	17.1404	56.7214	-17.9254	27.0671
288	19.1151	74.3535	0.930124	22.755	-122.094	136.198	-29.1127	95.8173	24.18	78.988	-68.1118	101.814	-35.1642	55.1997	2.62917	18.0157	37.0035	44.4348	6.85422	7.41681	16.6471	57.8531	-18.0254	27.649
289	18.106	76.3105	1.59588	22.5067	-123.903	135.279	-27.4427	96.0575	22.568	80.6	-67.0544	101.914	-35.2158	55.6688	3.13695	17.8303	36.6037	44.5782	6.18686	7.14761	16.1023	58.061	-19.186	26.8462
290	19.1215	75.6415	1.62973	22.7147	-123.392	135.774	-26.9446	96.0317	20.956	78.988	-68.726	101.896	-37.4419	55.0869	3.43034	17.7465	37.6563	45.3875	6.84778	7.45872	15.5155	58.8058	-17.3564	27.0639
291	19.5503	73.936	2.88226	23.5836	-123.445	135.468	-28.1133	96.4331	20.956	78.988	-69.7029	102.755	-37.2807	55.6027	3.50449	18.2495	37.184	45.3794	6.7027	7.25884	15.2028	60.5612	-17.3612	27.325
292	18.1979	74.584	4.68608	23.2499	-123.041	135.329	-27.886	96.7764	20.956	77.376	-69.553	103.913	-37.3581	55.074	3.81077	18.9539	36.3522	46.1451	6.26907	7.0654	14.1034	60.558	-18.0399	27.5588
293	16.5617	73.9166	4.73122	23.5803	-122.385	135.742	-29.2368	97.9999	20.956	75.764	-68.8034	106.793	-36.5408	55.8171	3.39004	17.9319	36.1007	46.158	6.46412	7.59252	14.055	61.6251	-18.193	27.3621
294	16.2296	73.4685	4.58936	23.2192	-123.91	135.695	-28.9499	97.2503	20.956	75.764	-68.9452	106.942	-36.6343	55.2916	3.75112	17.5644	35.2141	46.0178	7.39747	7.4555	12.5397	62.8503	-17.3419	28.131
295	16.5843	73.0059	4.9037	23.6948	-124.208	135.202	-28.3648	97.692	20.956	74.152	-68.6373	108.559	-36.9793	55.4302	4.91176	17.9174	35.7284	46.6642	7.15728	7.9794	12.6606	63.8433	-18.2317	27.5958
296	16.6665	75.2191	4.99881	23.7222	-124.512	135.208	-29.5689	97.4438	19.344	72.54	-69.0033	109.487	-36.8197	56.0315	3.73823	17.8884	36.1652	46.4869	7.21692	7.45389	12.5462	64.8653	-17.5934	27.6506
297	16.7326	75.8704	5.24545	24.5443	-125.27	136.296	-29.9961	98.1789	22.568	74.152	-67.6444	110.469	-35.1755	56.507	4.00582	19.236	35.7767	46.2934	7.57156	8.41303	12.1045	65.4246	-17.8158	27.3992
298	17.9786	75.4867	5.64039	25.015	-125.36	135.642	-29.0386	97.8452	22.568	74.152	-66.5692	111.289	-33.3152	56.1234	3.14824	19.747	34.6225	46.6384	7.25722	8.44688	11.7128	66.7126	-18.0512	27.483
299	18.7218	75.8607	5.40342	24.7265	-124.595	136.025	-29.3191	97.4341	22.568	75.764	-66.7191	112.15	-34.0696	57.4339	3.30299	18.8588	33.9745	46.6384	7.83754	8.44366	12.1625	67.3735	-17.9271	27.5459
300	17.9738	74.0214	6.07402	24.7232	-125.114	136.341	-31.0568	97.8178	22.568	74.152	-67.7943	112.132	-35.3495	56.6602	3.9768	18.3881	34.9707	47.8538	8.60163	8.15027	11.342	68.2843	-17.8336	27.2428
301	16.8535	77.5985	6.851	25.8726	-125.459	137.062	-31.5291	98.2675	22.568	74.152	-68.1715	111.842	-35.543	56.2781	3.56091	18.3413	35.5043	47.3606	7.67312	8.82248	11.3759	69.2064	-17.3967	27.9892
302	16.4891	75.6109	6.52699	25.8049	-127.126	137.16	-31.5936	96.583	22.568	74.152	-68.9597	112.402	-35.8412	56.2072	4.0171	18.401	36.183	47.1268	7.43777	9.03365	10.399	70.8297	-18.2849	28.1939
303	15.9717	78.3593	5.95956	24.8764	-128.581	137.091	-32.3528	98.1692	24.18	74.152	-68.6261	114.125	-33.9584	56.5989	4.33628	19.7825	36.6198	47.8151	7.87946	8.9192	10.5634	71.8597	-18.0222	28.3567
304	15.6541	80.4227	5.52916	26.8511	-129.984	139.42	-31.3534	97.1794	20.956	72.54	-71.5244	115.34	-36.4876	56.2524	4.14284	20.0259	37.0002	48.4857	8.72576	9.07234	10.3087	73.562	-18.4606	28.692
305	16.3618	81.2625	5.29381	25.8629	-132.049	137.188	-31.2132	96.7829	22.568	72.54	-72.2724	116.019	-36.7407	56.5216	2.93706	19.9034	38.1077	49.1805	7.56512	9.53337	10.1217	74.7194	-17.5434	27.8118
306	16.1216	80.7548	4.39109	25.9451	-133.303	138.398	-31.7129	97.5228	20.956	74.152	-72.0677	117.323	-37.0534	56.6376	4.12188	20.1645	36.0459	49.353	7.53932	9.90413	9.72842	74.929	-18.3752	28.4792
307	15.9249	80.8208	3.86558	26.4207	-133.464	137.333	-31.4001	98.9542	20.956	74.152	-71.4277	117.051	-36.6714	56.8665	4.44267	20.316	36.1958	50.6184	8.30664	9.39474	9.82514	75.4593	-18.9281	27.5297
308	15.9121	80.65	3.93167	27.051	-134.017	138.737	-31.3341	99.8908	22.568	74.152	-70.3267	117.373	-36.2684	57.0471	5.07296	20.1839	37.2162	50.4733	7.97295	9.38023	10.4167	76.6877	-18.6815	28.7371
309	16.2554	77.2035	2.31967	27.72	-134.483	138.036	-31.2261	100.906	22.568	72.54	-69.2564	116.789	-35.3415	56.1975	5.05684	20.4095	37.1066	50.0462	7.59413	9.7929	9.53659	76.7409	-19.2698	28.8677
310	15.9266	79.5248	1.96503	28.1939	-135.078	138.474	-32.0079	101.205	22.568	72.54	-69.877	116.886	-36.2942	56.6844	4.06224	21.6524	36.7665	50.7941	8.82248	10.0992	9.29157	78.0256	-18.4542	28.8887
311	18.3268	82.6843	1.88443	28.7355	-136.356	138.582	-32.6043	102.164	20.956	70.928	-69.8786	116.693	-36.5199	56.6408	4.34434	21.5895	35.6719	50.8457	8.40819	9.82836	9.12231	78.8478	-18.3317	29.1417
312	16.9244	81.1948	1.55236	27.9682	-136.973	137.412	-33.4216	103.631	22.568	72.54	-69.1854	117.383	-35.9847	57.5484	5.16162	21.3364	36.2539	51.3777	8.50652	10.8471	8.4759	79.8472	-17.5676	29.5496
313	19.3408	81.4673	1.08326	29.232	-138.269	138.658	-33.8004	105.011	22.568	72.54	-68.3407	117.62	-35.3915	57.6757	4.72477	21.8958	37.0808	51.6727	9.34476	10.5538	9.04493	79.8311	-19.5374	29.7801
314	17.0098	81.2319	2.21811	28.9112	-137.389	138.31	-34.2856	104.221	22.568	72.54	-68.3278	118.05	-35.1851	57.7966	4.62483	21.8571	36.1926	51.9789	9.00302	11.1421	8.73382	81.9541	-19.3472	30.0783
315	17.1565	82.2056	1.18804	29.1901	-139.515	136.997	-35.0288	104.783	20.956	70.928	-68.6631	119.053	-35.9976	58.7139	3.97842	21.417	36.9438	51.0553	8.61775	11.3179	7.71503	82.4474	-18.7073	30.0896
316	15.472	78.8236	1.1687	30.1734	-138.8	138.028	-34.1567	105.101	19.344	72.54	-69.4385	119.378	-36.8906	58.6832	4.2847	22.0102	36.5747	52.3368	8.62098	11.4146	6.3271	84.3318	-18.9168	29.556
317	16.0394	82.4812	-1.53624	31.9837	-141.102	137.674	-34.5468	105.459	19.344	72.54	-69.2741	119.48	-36.7278	58.0417	4.62483	22.0215	37.0792	51.5888	7.09119	11.7096	6.22877	84.4221	-17.8884	30.3362
318	17.4531	84.6236	-1.76836	33.5296	-141.33	138.381	-33.686	105.628	19.344	70.928	-68.6712	120.057	-36.0153	58.0965	5.92088	23.0242	35.6252	52.0886	9.0401	11.2227	5.51788	85.6198	-18.9539	30.9407
319	16.8873	82.2281	-2.26808	33.5441	-143.534	137.829	-33.6054	105.364	19.344	69.316	-68.0151	120.918	-35.6832	58.572	6.45122	23.7206	36.0911	50.7748	7.96489	11.1454	5.1052	86.9029	-18.9845	30.8505
320	17.3064	83.5145	-2.85324	33.5522	-144.766	136.943	-32.5092	106.324	19.344	67.704	-68.4568	120.539	-36.104	57.4581	6.20136	24.0059	35.9734	50.6345	8.53876	11.4662	4.44106	88.1039	-18.0141	30.6232
321	17.2694	83.3114	-3.2369	34.8724	-145.802	137.059	-31.9901	106.137	19.344	69.316	-68.0828	121.245	-35.8315	57.7918	6.05145	23.648	35.2238	49.806	8.72253	11.7483	4.46846	89.0694	-18.0399	30.5603
322	19.0603	84.4865	-4.47652	35.3512	-147.708	136.311	-31.7919	106.045	20.956	66.092	-67.0141	122.979	-35.4027	58.9154	5.49853	23.9269	36.0749	51.4389	9.80418	12.8299	4.29759	89.998	-18.2817	31.2212
323	17.9657	83.5322	-4.1106	35.9895	-148.264	136.316	-29.3142	107.026	20.956	69.316	-66.0533	124.296	-34.7483	59.5973	5.43566	23.8818	34.6564	53.5071	8.93693	11.6741	3.61894	91.4343	-17.8497	31.2486
324	19.5648	84.7122	-5.16324	37.1502	-150.255	136.791	-28.4518	106.75	20.956	67.704	-66.0017	124.153	-35.0884	59.3861	5.48886	24.4895	32.8445	51.9564	8.50169	12.2915	3.72211	92.4466	-18.1866	32.0095
325	19.4407	84.3543	-5.41148	36.7762	-152.273	135.972	-29.0289	106.874	20.956	66.092	-66.8142	124.245	-34.6113	58.9589	5.37118	24.6088	32.83	51.152	9.34638	12.6139	3.51255	92.6852	-18.2511	31.9643
326	19.0538	84.8234	-5.1713	37.8594	-153.224	136.08	-28.5437	107.459	20.956	66.092	-67.4558	125.301	-35.0513	59.6746	6.22393	24.8216	32.4286	50.512	9.72036	12.3657	3.40777	94.3697	-18.7734	31.563
327	18.725	84.7815	-6.41898	37.8643	-155.814	136.274	-27.9069	108.057	19.344	66.092	-66.9286	126.087	-35.0707	59.5956	5.96279	25.0714	32.6478	49.9446	9.38184	12.6413	3.71566	94.705	-18.517	32.6801
328	18.1705	84.7896	-7.0928	39.3392	-157.041	135.985	-25.5744	108.712	20.956	66.092	-66.1662	126.371	-34.0213	59.7133	5.4808	25.0473	33.8504	51.0843	9.28673	12.4833	3.07892	95.3659	-18.3768	32.8155
329	18.0383	84.2189	-9.15616	39.6649	-159.243	135.013	-24.5927	109.539	20.956	64.48	-65.5762	126.476	-33.723	59.8745	5.76129	25.8516	33.204	51.4389	9.23354	12.9347	3.33845	96.6475	-18.1576	33.1798
330	18.8507	84.6252	-10.0137	41.1737	-161.319	135.514	-23.1918	109.643	19.344	64.48	-67.2494	126.813	-34.7886	58.9702	5.3196	25.5212	33.204	50.9328	9.8332	12.5543	3.15952	97.3841	-17.8787	32.3964
331	18.991	84.1303	-11.2082	41.106	-162.332	135.377	-21.654	110.846	17.732	64.48	-67.5283	128.462	-34.3501	60.1373	5.9773	25.4422	33.2749	50.6764	9.08684	11.6161	3.05313	98.3513	-18.596	33.9471
332	19.4456	83.0438	-11.0229	42.186	-163.073	135.406	-20.5353	111.394	19.344	64.48	-67.2252	128.33	-33.586	59.7327	6.2594	26.8914	33.9955	52.145	9.88156	12.8315	3.29654	100.465	-17.7256	32.6559
333	20.5885	84.2657	-11.0051	42.1731	-164.216	135.771	-18.7959	111.945	19.344	62.868	-68.452	128.82	-33.6908	59.4361	5.98052	26.8833	33.3007	49.6947	10.0524	12.6413	3.66569	101.034	-18.1302	33.2491
334	20.3386	84.5155	-11.1115	42.6874	-165.075	135.743	-15.3188	112.748	20.956	62.868	-69.4933	130.337	-33.2588	59.4828	5.16968	26.3095	34.1405	50.5426	9.62686	12.4978	3.09988	101.962	-17.5144	32.8816
335	20.3241	83.2501	-11.7595	42.9759	-166.073	134.757	-14.2743	114.12	19.344	64.48	-70.4847	132.179	-33.4313	60.3355	6.40931	27.1058	33.2733	51.102	9.94282	13.5779	3.29493	103.463	-18.0093	33.7811
336	18.2285	84.285	-11.7918	43.7029	-167.185	135.195	-12.6735	114.718	19.344	62.868	-71.4809	133.119	-33.1379	60.4935	5.99503	27.1686	33.4667	51.6372	9.84932	12.3092	3.07247	103.958	-16.8357	33.6715
337	17.5289	83.5435	-12.1722	43.4047	-169.002	135.595	-12.0352	116.066	19.344	64.48	-72.7834	134.27	-33.7617	60.8949	5.31315	27.6007	34.4404	51.5453	10.291	13.5859	3.49643	106.041	-17.5789	33.4377
338	17.6208	84.7622	-12.838	44.4106	-169.845	135.385	-9.74454	118.097	19.344	61.256	-73.1574	134.534	-32.8316	60.2469	5.53561	27.7022	33.3313	52.4416	10.3426	12.651	3.40293	107.072	-16.9034	33.0541
339	17.4418	84.2818	-13.5908	44.5589	-170.216	135.061	-7.37168	119.448	20.956	64.48	-73.6861	135.864	-32.7639	60.3984	5.20515	27.6377	33.5215	52.3545	10.457	12.011	3.64634	107.864	-17.0985	33.2878
340	19.0184	84.1206	-14.6353	45.7244	-171.591	135.177	-5.20354	120.678	19.344	62.868	-74.9532	136.298	-32.8413	60.4016	5.11971	28.3325	34.6564	53.2556	9.84932	12.5865	3.116	109.337	-17.063	33.4361
341	19.2021	84.0094	-14.4306	45.2537	-171.646	134.373	-3.45774	121.75	17.732	62.868	-75.1111	137.242	-33.3345	60.9868	4.29114	28.4728	32.3512	53.3814	9.2416	13.0088	2.73718	110.865	-16.8406	33.5683
342	20.2483	85.4441	-14.7305	46.4159	-173.127	135.237	-0.809224	122.859	17.732	62.868	-76.4701	138.529	-34.0551	61.177	4.88597	28.0424	32.298	52.0821	9.65266	13.349	3.26752	112.115	-16.5472	34.0196
343	20.9093	83.7869	-15.335	47.2171	-173.442	135.11	2.49538	124.282	19.344	62.868	-75.8962	138.453	-32.9735	61.0061	4.50554	28.3406	31.9901	52.4206	9.27545	13.731	3.34974	113.369	-16.768	34.1325
344	19.9952	85.0749	-14.5725	46.7512	-174.222	135.329	3.95585	125.955	19.344	62.868	-76.2895	138.803	-33.0428	61.0158	5.31315	28.1181	32.5318	52.4883	10.4893	13.3183	2.45669	114.239	-17.0533	34.6161
345	18.4461	84.1577	-15.0609	47.7813	-174.86	136.303	4.44751	126.921	20.956	62.868	-76.9649	140.091	-32.9025	61.5929	4.65868	28.3825	30.8859	53.5506	10.4135	12.8573	2.57436	114.652	-16.4472	34.6161
346	18.3349	84.0094	-15.285	48.389	-175.606	136.573	6.33194	128.344	20.956	61.256	-77.8048	139.53	-33.3523	60.4484	4.35401	29.0789	30.7699	53.8472	10.3265	13.0959	2.34224	116.062	-17.0711	34.874
347	17.416	84.7928	-16.2941	49.4578	-176.337	136.964	7.51676	129.347	20.956	61.256	-77.9547	139.559	-33.7392	60.0067	4.62644	29.1579	31.5162	53.0622	9.83481	13.5682	2.59371	116.117	-16.8019	34.55
348	18.0302	84.169	-17.566	49.4126	-178.252	136.983	9.33187	128.201	20.956	59.644	-77.7065	139.851	-32.4979	59.9277	5.25028	28.771	32.2384	53.2911	9.58818	12.7864	2.60499	117.653	-15.9669	34.0906
349	18.667	84.9137	-17.3983	49.885	-178.876	137.895	11.5097	129.139	20.956	59.644	-78.0917	140.592	-33.2056	60.4548	5.26479	28.721	32.6124	54.6323	10.3652	12.7396	2.74685	118.393	-16.7632	34.7934
350	19.1796	84.0432	-17.7771	49.3143	-179.775	137.086	13.3167	129.506	20.956	61.256	-78.5753	140.831	-32.8026	60.1389	4.59098	29.2062	31.7451	54.2374	11.068	12.9363	2.30516	119.098	-16.1329	34.2195
351	19.7406	84.8879	-18.625	50.6974	-181.224	137.339	15.7009	129.46	22.568	61.256	-78.4834	140.537	-32.6833	60.0986	4.54906	30.5861	31.0584	54.7097	10.2829	13.76	1.612	119.752	-16.2216	34.8772
352	19.2795	84.8895	-17.919	51.5034	-183.367	137.681	16.1039	130.53	20.956	59.644	-79.8182	141.447	-31.8354	60.097	5.05846	30.8376	31.168	54.9579	10.6408	13.5553	1.1687	121.467	-16.6375	34.9465
353	18.6799	86.4064	-17.0582	51.6098	-184.842	137.758	15.9072	130.382	22.568	59.644	-79.2298	142.867	-31.0197	60.9981	5.40826	32.0675	32.3125	55.2626	10.9906	13.8519	1.57654	120.797	-16.1845	34.1035
354	18.5444	85.9357	-18.2156	51.8048	-185.993	137.734	16.897	131.352	20.956	58.032	-80.068	143.063	-32.0401	61.0013	5.93538	32.3512	32.4447	54.7564	10.9858	14.1453	1.14291	122.064	-16.8003	34.097
355	18.4526	85.2603	-19.4278	51.3922	-187.024	137.791	17.0259	131.226	19.344	59.644	-80.5404	142.826	-32.1481	61.1319	4.73283	33.1508	32.672	55.2561	11.3856	13.9551	1.28476	122.456	-16.6503	34.5742
356	19.9195	84.8251	-21.5524	51.2842	-187.69	137.104	18.9474	131.504	19.344	58.032	-80.6903	142.246	-32.153	60.7756	4.82794	32.5608	32.1916	54.5823	11.1309	13.889	0.527124	123.076	-16.8196	34.5613
357	20.4095	84.1013	-21.23	52.2755	-189.078	137.981	19.8034	131.326	19.344	56.42	-80.2002	141.891	-30.7086	60.205	4.78119	31.6613	32.859	55.6108	11.1808	13.4989	-0.560976	124.043	-16.5359	35.6091
358	21.222	85.1507	-22.0892	52.2175	-190.692	138.097	21.5218	130.944	19.344	56.42	-79.3362	140.728	-30.3056	59.1959	5.43889	32.6881	33.0492	56.0944	10.6086	13.2893	0	124.767	-16.6503	34.8289
359	21.6169	85.2506	-21.3864	52.1063	-188.628	137.386	22.7679	131.338	17.732	58.032	-80.8128	141.377	-31.434	60.7385	5.56785	31.2938	33.5925	55.9783	11.363	13.6182	-0.857584	125.962	-16.5907	34.7596
360	20.8061	85.3973	-21.467	52.9687	-191.425	138.447	23.0435	130.548	16.12	56.42	-81.2561	140.94	-31.3905	60.3178	4.55068	32.0288	34.168	56.0009	11.4259	13.2668	-0.954304	125.581	-16.1152	34.55
361	21.1172	85.3457	-21.3783	52.4867	-192.292	138.4	24.6636	130.435	14.508	56.42	-81.9025	141.119	-31.355	60.0438	4.3395	32.3093	35.277	56.4974	11.4807	12.9556	-1.59749	126.471	-17.2	34.7112
362	20.4901	85.3764	-23.05	52.8091	-193.516	138.211	24.9876	130.911	17.732	56.42	-81.5591	141.558	-31.0197	60.3678	3.91232	31.5807	34.608	55.0724	11.4565	14.1066	-1.56848	127.238	-16.2538	34.7015
363	20.3612	85.0137	-22.6373	52.0805	-195.403	137.824	26.361	130.632	17.732	56.42	-82.1282	141.479	-31.0987	59.81	4.13478	31.4227	34.924	55.7784	11.4645	13.8084	-1.86025	128.439	-16.8825	35.0126
364	19.689	84.8057	-23.1661	52.9478	-195.611	138.547	26.6673	130.179	17.732	54.808	-81.2174	140.66	-29.2046	58.8606	5.20515	30.9714	35.1577	55.6495	10.7117	14.4564	-1.88926	128.741	-16.2425	34.3614
365	18.6154	85.6875	-22.51	52.9478	-197.634	138.782	28.0762	129.563	16.12	56.42	-82.3684	140.642	-29.3465	58.2045	3.9768	32.1062	36.6085	56.0895	12.1545	13.6278	-2.3503	128.831	-16.0362	34.9675
366	18.3397	85.5908	-23.137	53.0509	-197.899	138.819	28.7952	129.276	17.732	56.42	-81.5704	140.226	-29.1579	58.6107	4.0832	31.9128	35.2722	56.0218	10.9664	14.2243	-2.6195	129.416	-15.7363	35.2286
367	18.2511	85.3683	-23.2563	53.8472	-196.463	138.746	30.3926	130.151	19.344	54.808	-82.083	139.717	-27.9682	57.945	4.46524	31.9353	35.6719	55.6317	11.8031	13.6714	-2.9693	130.345	-16.2796	35.2996
368	19.1393	85.1749	-23.2225	53.9214	-194.794	138.285	32.0224	129.789	17.732	58.032	-80.3598	139.307	-26.7125	58.5285	4.6748	31.4775	36.033	57.4339	11.3694	14.6482	-2.77586	131.144	-16.502	34.8369
369	19.3875	85.2667	-23.3853	53.4152	-196.424	137.997	33.1911	129.639	22.568	56.42	-79.657	136.675	-26.2917	57.7257	5.1584	32.0546	36.4908	57.1889	11.5919	14.1421	-2.60338	130.988	-16.0136	34.9159
370	18.4929	85.4199	-23.6335	53.4056	-192.603	137.289	33.0009	129.555	19.344	56.42	-80.3115	136.232	-27.0381	56.9858	5.79514	32.161	36.6456	56.9423	11.7595	14.6998	-3.00316	131.001	-16.3489	35.3254
371	19.8582	84.9105	-23.1515	53.3137	-190.327	136.906	33.773	129.569	17.732	56.42	-80.4049	137.368	-25.7307	57.0664	5.48564	32.1401	37.0389	57.924	11.9901	14.5822	-2.78715	131.57	-16.386	35.6268
372	21.2462	84.7493	-23.058	53.2331	-190.108	136.62	35.0465	130.071	16.12	48.36	-79.449	136.727	-24.4218	57.0519	4.44912	33.025	37.1002	57.9627	11.9707	13.6794	-2.82906	131.786	-16.0716	35.2093
373	20.5659	85.5198	-22.3052	53.6345	-189.491	136.496	36.5247	130.15	17.732	48.36	-79.1653	136.058	-23.3708	56.6263	4.15896	32.6269	36.1926	59.0363	12.8476	14.5241	-3.519	132.29	-15.364	34.8305
374	21.1269	85.2893	-21.1027	54.2583	-187.685	135.835	38.3156	129.992	17.732	49.972	-79.0315	134.974	-23.7238	56.1508	3.78981	32.8703	35.4898	57.1067	11.5226	13.8181	-3.35941	132.964	-15.6396	34.9901
375	21.0285	85.5021	-20.7626	53.944	-186.122	134.839	38.6461	130.343	17.732	48.36	-79.3443	134.631	-23.2724	56.7585	4.12027	32.3319	35.8315	58.2061	11.9078	13.8197	-2.94512	132.85	-16.2296	35.6752
376	21.2059	83.5951	-19.5133	53.873	-185.569	134.626	39.0459	130.28	19.344	48.36	-78.3819	133.881	-22.6808	56.6715	5.14228	32.7832	37.2678	58.6849	12.4801	13.5472	-3.12728	133.18	-15.5316	35.2754
377	21.2075	84.1416	-19.9275	55.4802	-185.817	133.693	40.8803	130.545	19.344	48.36	-77.2245	132.946	-21.0398	56.8311	5.00204	33.1669	36.9551	57.7934	13.0475	14.2775	-4.06385	133.662	-16.0604	35.5752
378	20.5901	84.6042	-18.9346	55.7865	-185.256	133.462	41.8588	131.002	19.344	48.36	-74.9564	131.344	-20.9689	56.1508	5.2922	32.8058	38.1673	58.5349	12.0755	13.702	-4.18636	133.378	-16.2973	35.3915
379	20.0227	84.4511	-19.8985	56.104	-186.073	132.838	43.4853	129.668	20.956	48.36	-75.901	130.416	-21.6943	55.9493	3.89943	33.2346	36.594	58.8686	12.5172	13.8229	-4.13317	133.43	-15.7218	35.1996
380	20.5836	84.8895	-21.0398	56.262	-187.713	132.611	44.999	130.111	19.344	48.36	-75.9881	129.616	-21.4138	56.6634	4.03	33.723	35.925	57.7886	12.406	14.1727	-4.41527	133.482	-16.257	35.082
381	21.7153	83.7498	-20.5191	55.4335	-188.362	131.264	46.5981	129.515	19.344	46.748	-75.5609	128.855	-20.1226	56.7811	3.88008	33.4764	36.8084	57.1357	13.3667	13.9486	-4.14929	133.52	-16.2957	35.9492
382	21.9828	84.9653	-20.2919	55.3351	-187.961	131.072	48.0569	129.25	19.344	45.136	-75.124	126.229	-19.2602	55.9574	5.01654	33.8085	36.5682	57.9869	13.6762	13.6746	-5.37763	134.28	-15.7621	34.9901
383	22.9565	84.7976	-19.7502	56.3007	-188.166	130.798	48.9919	127.274	19.344	45.136	-75.577	124.959	-20.0178	56.4909	4.80376	33.9133	37.5386	57.2647	13.2523	13.9067	-4.37336	133.504	-15.8427	35.4979
384	22.3713	83.342	-19.6454	56.6231	-189.013	129.722	49.6125	128.193	20.956	45.136	-77.0407	123.99	-20.6272	57.7386	4.85212	33.7956	37.8756	56.0783	13.1249	14.1243	-5.32605	133.224	-15.7122	35.8412
385	20.7255	84.6477	-19.0232	56.7746	-189.673	129.829	50.5233	128.31	19.344	43.524	-77.2841	123.873	-21.3171	57.0374	4.1509	33.694	38.3914	57.284	13.0508	14.234	-5.01493	133.524	-15.7654	36.1362
386	20.9899	84.7251	-19.5374	57.1535	-190.505	128.223	52.8059	127.488	17.732	43.524	-77.2744	121.712	-22.51	57.3195	4.10576	33.0766	38.5397	58.2722	13.2813	14.3355	-5.54206	133.498	-15.9137	35.8718
387	20.4192	84.688	-20.3112	58.4737	-191.265	127.727	53.1283	127.303	19.344	45.136	-77.2148	121.472	-21.5573	57.5033	4.19604	33.3587	39.9953	57.6113	13.8342	14.3307	-4.88597	133.306	-15.4962	35.2238
388	20.1629	85.162	-22.4664	59.4328	-192.935	126.208	55.2803	127.137	19.344	41.912	-77.397	118.872	-21.043	56.1105	3.37069	32.9348	39.4666	56.8988	13.6069	13.8777	-5.33894	133.491	-15.6267	35.5736
389	20.9753	83.2082	-23.0597	59.5602	-193.806	125.43	56.2491	126.837	20.956	43.524	-76.1428	117.858	-22.331	56.6989	3.27881	33.212	39.66	56.802	13.9277	14.6966	-5.60654	133.101	-16.2135	35.7687
390	20.9479	82.8649	-22.2037	59.6472	-194.825	124.895	57.3727	126.37	19.344	43.524	-75.9204	115.695	-22.5003	56.1911	3.27558	32.701	39.407	57.1599	13.6391	14.1324	-4.93756	133.411	-15.1464	34.2066
391	21.87	81.1481	-22.8082	59.9632	-195.558	124.271	59.0959	126.131	19.344	41.912	-73.9134	114.183	-22.7066	56.1169	2.9548	31.9579	39.8261	58.5688	12.9234	14.1308	-5.02138	132.885	-15.9008	35.4737
392	22.0377	83.184	-23.1515	60.2727	-196.156	123.399	61.3624	126.479	20.956	41.912	-72.3611	110.64	-23.287	54.7258	3.25946	33.2765	39.4553	57.55	13.025	14.616	-5.37602	132.856	-15.9943	35.5623
393	23.2225	81.2061	-22.805	60.795	-196.885	123.326	62.7745	125.467	22.568	43.524	-69.9769	109.326	-23.5223	54.3969	4.00743	32.3545	41.193	58.7235	13.025	13.8777	-5.42438	132.492	-16.2973	34.9997
394	24.6749	80.7467	-23.6029	61.4317	-198.228	122.844	64.8072	125.067	22.568	41.912	-68.8566	108.8	-23.7834	54.8854	4.20893	31.9998	41.3172	58.5785	12.1367	13.5134	-5.90798	132.495	-15.1238	34.2421
395	25.0311	82.5215	-23.1451	61.3205	-198.345	122.701	65.8776	125.555	20.956	41.912	-67.7507	107.017	-24.4057	54.6307	3.78981	32.4802	42.8357	59.2168	12.6752	13.7197	-5.16968	132.524	-16.0297	34.3695
396	24.4718	81.9799	-23.403	62.0894	-199.641	123.245	67.8459	125.336	20.956	40.3	-66.582	106.903	-23.2934	54.6097	3.39326	32.3109	41.8024	59.4361	13.3586	13.4666	-6.07402	132.953	-16.1055	35.3947
397	24.641	82.2249	-23.935	61.9266	-200.098	122.059	69.5223	124.377	20.956	38.688	-64.7218	106.988	-21.6234	55.0611	3.51094	31.5694	41.2108	59.7375	12.2367	13.3877	-5.33088	132.274	-15.4462	35.464
398	24.9747	82.7117	-24.3041	62.5101	-201.144	121.654	71.4148	124.532	20.956	38.688	-62.8003	106.26	-20.8045	55.1111	4.81021	32.0885	41.8008	59.9696	12.3785	12.2512	-5.69681	132.774	-15.6606	35.4576
399	23.5868	81.946	-25.2955	62.5037	-202.662	121.579	72.9462	123.74	20.956	38.688	-62.8744	106.205	-21.3429	57.5984	3.93167	32.1642	42.6422	60.7966	11.3872	12.0078	-5.50498	132.643	-16.1925	34.2905
400	24.6169	81.6462	-26.3352	61.9185	-206.439	121.63	74.2133	123.64	22.568	37.076	-61.8718	104.253	-19.5068	55.9025	3.05958	32.2851	42.2924	61.2334	11.3823	11.1663	-6.06112	132.284	-15.6557	34.6306
401	24.1719	81.8832	-27.7635	62.1652	-208.338	121.63	76.8279	123.039	22.568	37.076	-60.2904	102.77	-19.9114	55.1143	3.15791	32.0611	41.891	60.7901	11.3807	10.5119	-6.58986	131.994	-15.4607	34.7596
402	25.2391	80.8805	-30.0187	61.6671	-209.721	121.964	78.2126	122.185	22.568	35.464	-59.7794	101.421	-19.934	53.3217	3.14018	32.1401	42.4085	61.3705	11.3066	10.1459	-6.4609	132.031	-15.5961	34.3952
403	25.9822	79.2201	-30.0396	60.9787	-210.663	121.284	80.1503	121.783	20.956	35.464	-57.7451	100.6	-19.373	50.7861	3.68664	32.5076	43.1484	61.5752	11.205	9.06266	-6.73816	131.766	-14.8917	35.1094
404	26.4755	78.2433	-30.6119	60.7531	-212.134	122.425	81.6317	120.852	20.956	33.852	-55.9058	99.2122	-17.3741	49.2482	3.79948	32.0917	44.5202	61.2753	11.0261	8.66934	-6.56729	131.154	-15.4833	34.4807
405	26.4723	79.3926	-31.8177	60.5628	-213.919	122.254	82.7359	120.669	22.568	33.852	-53.6667	98.0418	-15.3704	48.3745	3.96552	31.6033	45.9098	62.0507	9.63976	8.26311	-6.55439	131.286	-15.2318	34.0954
406	27.2154	79.449	-35.3866	59.1862	-215.836	122.281	83.9513	119.589	24.18	33.852	-52.7414	97.1182	-15.1189	48.173	3.44484	32.1562	46.7045	61.6945	9.53659	7.4426	-6.49636	131.344	-14.5789	33.9439
407	26.5174	78.6092	-37.5789	59.4103	-217.217	123.479	85.3151	118.472	20.956	32.24	-52.7027	95.8479	-15.8718	46.9624	3.11922	32.0981	45.5003	61.825	9.19968	6.69947	-6.5157	130.815	-14.566	33.0186
408	26.5899	78.6205	-38.9765	58.3447	-221.015	123.813	86.6837	117.641	22.568	32.24	-51.3567	94.165	-14.9932	46.8576	2.81133	31.8225	46.2837	62.0153	8.36789	6.5415	-6.42382	131.107	-14.213	32.0562
409	26.5851	75.7447	-41.6154	58.5092	-224.489	124.551	88.0894	117.47	22.568	30.628	-48.8275	92.3676	-13.9035	45.3456	4.33306	31.3292	45.7905	62.2957	7.45872	5.92732	-6.35612	130.182	-15.069	32.3512
410	27.3911	77.5759	-42.1586	58.0449	-227.632	125.331	88.7277	117.202	22.568	30.628	-46.2773	91.1119	-12.4753	44.6008	5.5211	31.2454	46.2773	63.2774	7.47001	5.15518	-6.16429	129.797	-14.2581	30.9923
411	27.3476	76.5781	-42.56	57.3759	-229.359	126.073	90.5525	116.818	24.18	30.628	-46.1838	89.0614	-14.3742	43.6497	4.8892	31.924	45.9162	62.7132	6.72043	4.8634	-6.21426	128.936	-14.3436	30.6651
412	28.1568	76.6264	-42.7373	56.5651	-232.097	126.478	90.8717	116.348	24.18	29.016	-44.2301	87.933	-13.2651	42.5939	4.30565	31.2132	44.9603	63.4209	6.69302	3.74951	-5.70648	127.485	-14.3887	30.6151
413	28.3277	76.6264	-41.164	55.6591	-233.206	127.159	92.8738	116.403	24.18	29.016	-43.466	85.976	-12.6123	41.3913	5.27446	31.9982	44.4412	63.2984	6.10787	3.88492	-5.45662	126.557	-14.3194	30.3185
414	28.8887	77.1003	-41.6218	54.376	-234.522	127.003	94.6163	115.906	24.18	27.404	-41.5429	84.7283	-10.7311	40.379	5.25673	32.2448	45.1682	64.0174	5.3728	3.55768	-5.50982	124.292	-13.5795	29.6882
415	28.9225	76.8392	-40.7191	53.325	-235.736	127.234	94.7421	116.069	25.792	25.792	-39.3731	83.2259	-9.19324	39.7003	5.35023	31.7774	46.2273	63.2259	5.52916	2.80327	-5.60331	122.959	-13.8713	29.4851
416	28.1423	77.7065	-40.5773	52.9429	-239.066	127.777	96.4992	116.199	27.404	25.792	-38.6912	82.27	-9.59785	38.4768	4.76991	31.7048	45.7872	63.9722	5.05362	2.23423	-4.87469	122.103	-14.342	28.1439
417	27.1896	76.6135	-39.357	51.7178	-241.075	126.845	97.7049	116.035	25.792	24.18	-38.4865	81.6704	-8.87084	38.4365	5.09231	30.9149	44.8378	64.3849	5.53883	2.17298	-4.55712	120.932	-14.6112	27.6555
418	27.2444	77.1922	-40.89	51.3067	-244.371	125.965	99.4668	115.948	25.792	24.18	-36.9632	80.139	-7.24433	37.213	5.76774	31.4598	45.3665	63.537	4.7022	2.11333	-4.29276	119.873	-14.782	27.0735
419	27.0735	77.5549	-40.2565	51.6614	-244.624	126.381	100.397	115.809	25.792	22.568	-35.3979	78.8284	-5.84189	35.9895	6.10626	31.4001	45.9307	63.7643	4.73122	1.97631	-4.90693	119.109	-13.8535	25.8758
420	27.9311	77.642	-40.3387	50.4524	-246.141	124.475	101.964	115.682	25.792	19.344	-34.4662	77.3518	-4.66674	35.0997	5.92571	30.7183	47.4121	63.8481	5.4679	2.77748	-4.15251	118.938	-13.9309	25.4277
421	28.239	78.9074	-39.228	49.727	-247.556	123.827	103.829	116.153	24.18	19.344	-34.5967	76.8682	-4.25246	34.1357	6.15139	30.5796	48.6502	64.3027	4.18153	0.83018	-3.86719	118.044	-13.6311	24.6572
422	28.3019	78.3448	-38.8073	49.245	-249.547	122.992	104.08	116.859	25.792	17.732	-33.9213	75.577	-4.03	31.9482	5.20515	31.1954	47.7636	63.3371	4.65384	0.904332	-2.9822	118.068	-12.8057	24.2896
423	27.4459	78.5834	-38.5204	48.6969	-249.949	122.928	105.168	117.576	25.792	16.12	-32.4657	75.4045	-2.87742	30.9552	4.86018	29.4883	48.4132	62.8148	5.15195	0.609336	-2.35997	117.747	-13.7342	24.3009
424	27.1445	78.9993	-39.2667	47.0575	-250.869	122.122	105.852	117.936	25.792	14.508	-31.0826	74.289	-1.67164	30.4797	5.65167	29.3271	48.5293	61.8283	4.65384	-0.267592	-2.39866	116.999	-12.8331	23.5916
425	27.1219	79.4974	-39.8648	46.9914	-253.145	122.048	105.52	118.401	25.792	11.284	-30.7441	73.9231	-2.27453	29.8704	6.47057	29.6028	47.6717	62.2087	4.73767	-1.14613	-1.55558	116.883	-12.3044	22.4374
426	26.3498	80.0068	-39.2748	45.2795	-255.309	121.253	107.14	118.883	25.792	9.672	-28.829	73.2074	-2.78876	28.9693	7.0525	29.8768	48.0166	62.494	4.78442	-1.2493	-1.59427	116.225	-12.2238	21.9103
427	26.8575	79.5957	-40.703	43.7497	-258.552	120.489	106.668	118.775	25.792	8.06	-27.7973	70.82	-3.05796	27.8344	6.4754	29.124	48.5889	62.0523	5.05201	-2.78715	-0.34658	115.727	-12.8863	20.977
428	28.3664	79.8859	-42.473	44.3155	-261.887	120.279	108.784	118.774	25.792	8.06	-26.9172	68.755	-2.96286	26.7721	6.61565	29.4674	48.3519	62.5488	4.47491	-3.61572	-0.340132	115.176	-12.3415	21.1543
429	29.5754	79.4474	-42.3086	42.4327	-262.961	118.355	109.316	119.183	25.792	4.836	-24.346	67.2655	-2.69365	25.1585	5.94667	29.2884	49.5674	61.9169	4.69898	-4.64901	0.756028	114.592	-12.1948	20.7335
430	28.8645	79.7311	-41.9539	41.7524	-265.527	116.891	109.205	120.079	25.792	3.224	-22.2875	66.034	-1.87959	24.1897	6.09175	28.9515	48.497	61.8831	5.33411	-4.57002	1.11067	114.784	-11.8901	20.7787
431	28.426	80.413	-42.0668	41.3607	-267.155	116.432	109.834	120.168	29.016	3.224	-22.4697	64.8072	-1.8264	22.7163	6.20942	29.0289	48.8452	60.6676	5.51304	-4.93433	2.2036	114.45	-12.5478	19.7615
432	27.8763	80.0729	-42.1715	39.9502	-269.686	115.569	109.755	120.397	29.016	1.612	-21.8168	64.5203	-3.27236	22.9533	6.63016	28.8226	48.6888	60.766	5.19064	-5.00042	2.67592	114.487	-12.925	18.7282
433	28.9015	79.9923	-42.9388	38.2963	-272.58	113.87	110.154	120.204	27.404	0	-20.8303	62.5069	-2.60016	21.2977	7.07668	28.9354	49.6786	60.8949	4.86179	-6.20942	2.99671	113.295	-12.7622	18.7024
434	29.1321	79.6731	-41.5332	37.774	-275.123	113.277	111.986	120.481	27.404	-1.612	-19.3488	61.0271	-2.20683	20.1516	6.45445	28.2068	49.1096	61.2689	4.22183	-7.23949	3.21433	112.614	-12.2705	17.9641
435	29.1192	80.2212	-40.4902	37.7611	-277.203	112.911	112.979	119.673	30.628	-3.224	-17.242	60.3049	-0.464256	18.8926	5.77096	28.1487	49.914	60.9868	4.66674	-6.89291	3.67214	112.24	-13.5344	17.6256
436	29.0966	79.0718	-40.7626	36.9696	-279.358	111.724	115.263	119.598	30.628	-4.836	-15.256	60.3565	0.407836	18.3929	5.24545	27.8699	52.0063	60.3452	4.58614	-7.13955	4.2041	112.018	-13.0362	16.3005
437	29.3868	80.5387	-40.9142	36.3957	-281.816	110.361	118.456	119.402	32.24	-6.448	-16.3602	59.4054	-0.253084	16.8696	5.84028	28.0714	51.3825	59.7278	4.34595	-7.54738	4.98108	111.655	-14.0711	15.2882
438	28.7823	79.7924	-41.3172	36.0556	-284.434	108.865	118.15	119.386	33.852	-8.06	-14.911	59.1169	0.253084	16.3441	4.7683	27.8634	52.4158	59.7842	4.73444	-8.04549	4.69414	110.917	-13.7294	14.6466
439	28.189	80.6113	-41.5203	35.0594	-285.379	108.11	119.232	119.148	35.464	-9.672	-12.4817	57.8595	1.80383	15.256	4.57002	27.2364	50.6474	59.2023	4.66674	-8.99657	5.24384	110.475	-14.4677	13.357
440	27.9327	80.8402	-41.401	34.5	-286.938	107.29	120.911	119.028	35.464	-11.284	-10.8343	56.4232	3.71405	13.5569	3.94134	27.4959	50.159	58.1271	4.65868	-9.08684	5.27769	110.109	-14.7401	12.0755
441	27.4008	80.7934	-42.8824	33.2088	-289.001	106.858	122.132	117.731	38.688	-11.284	-9.95732	55.3593	4.63289	12.6494	4.81182	26.7495	49.6512	58.6413	4.63772	-8.90952	5.66296	109.929	-15.1351	11.5322
442	26.5416	81.3464	-40.2903	31.3969	-290.581	105.615	121.667	117.437	40.3	-12.896	-10.3571	54.3744	4.34112	11.4404	5.75162	26.0838	50.5185	57.6177	5.11649	-9.06266	6.30614	109.905	-15.0319	11.7112
443	26.9414	80.7967	-40.0663	30.7602	-293.424	104.469	123.049	116.649	40.3	-14.508	-9.20613	53.0896	5.21966	10.5264	4.90209	25.4116	51.3873	56.3974	5.18742	-9.24482	6.34	109.697	-16.1297	11.118
444	26.9543	81.8896	-40.4128	30.2137	-296.842	103.69	124.675	116.124	40.3	-16.12	-8.46784	52.8059	5.09231	9.69457	4.7151	25.8259	49.4578	54.6565	5.38247	-9.10941	6.5012	109.145	-15.4591	9.62042
445	27.7071	82.0653	-39.6391	29.88	-299.318	103.187	124.685	115.408	41.912	-16.12	-7.08635	52.0063	6.31582	8.6774	4.36368	25.7291	49.8253	53.1009	4.53617	-8.97078	6.69464	109.024	-16.4279	8.5565
446	27.4749	81.2899	-40.2597	28.9435	-302.047	103.152	126.268	115.279	45.136	-17.732	-7.52643	52.1482	6.44478	7.29108	4.48458	25.1698	50.2138	52.5754	4.26374	-9.02559	6.85261	108.55	-16.6149	7.62637
447	29.0482	81.1062	-40.2242	28.6501	-304.56	101.875	127.117	114.421	45.136	-17.732	-6.48508	50.5765	6.93966	6.14172	5.17613	24.9231	52.0209	51.4164	5.23578	-10.0895	7.19274	108.386	-17.8771	6.94611
448	29.4738	81.3367	-39.976	28.9644	-307.358	101.367	129.423	113.838	45.136	-17.732	-6.29002	51.3245	7.4426	6.36901	3.89137	25.2133	52.1579	50.936	5.03911	-10.1072	7.11214	107.894	-18.4268	6.06757
449	30.1508	80.8112	-39.336	27.5023	-309.016	99.9859	129.987	113.249	45.136	-19.344	-5.11488	51.7113	8.17606	6.01598	3.18531	25.2004	53.0961	50.6265	5.41632	-10.507	6.68013	108.051	-18.7685	5.27769
450	29.0982	81.3157	-38.7412	27.9505	-310.444	99.3621	130.951	112.348	48.36	-19.344	-3.38036	51.8016	9.0804	4.96335	2.97414	25.0376	51.9225	50.2074	4.61838	-11.263	6.80425	107.599	-18.6815	3.84462
451	28.0972	80.4823	-37.1356	25.6195	-312.096	97.5147	131.426	112.766	49.972	-19.344	-3.10794	51.8435	9.69618	3.93006	3.10955	24.5814	52.7366	49.0451	5.8161	-11.0358	7.254	106.595	-20.4885	4.41849
452	26.353	80.6435	-36.6359	24.0091	-314.783	96.7377	132.144	112.355	49.972	-19.344	-3.04023	50.9311	10.391	3.12889	3.29976	24.8554	53.3636	49.3804	5.27769	-11.8321	7.68602	106.995	-19.9356	2.85485
453	26.8575	81.6285	-36.0669	22.7566	-316.461	95.9607	131.665	112.793	49.972	-20.956	-2.96124	49.7592	10.5006	1.51689	3.7076	23.935	54.4276	49.7576	4.77797	-11.7918	7.47001	107	-20.8512	1.5991
454	26.4884	80.7048	-35.7848	22.2037	-317.527	94.8807	132.969	112.366	51.584	-20.956	-1.30411	50.3041	12.7155	1.36053	3.16597	24.741	54.534	49.4368	4.96335	-12.5188	7.64249	106.113	-21.122	1.32829
455	25.5712	80.7983	-35.817	20.1645	-318.889	93.5879	134.723	111.941	51.584	-20.956	0.836628	50.2944	13.4602	0.559364	3.84623	24.3025	55.369	49.0644	5.34539	-12.6365	7.7505	106.489	-21.712	-0.351416
456	25.7549	80.5113	-35.5543	19.3859	-320.398	92.8351	135.335	109.78	53.196	-20.956	2.09076	49.7125	14.0034	-0.860808	2.31161	24.4186	56.441	48.8726	5.76774	-11.7757	8.0068	107.245	-21.8555	-0.465868
457	25.1972	80.2969	-35.6445	18.4171	-321.068	92.5288	135.063	106.951	54.808	-20.956	2.81939	49.893	14.7482	-1.15258	1.99727	23.5207	55.0337	48.0457	5.92894	-13.2506	8.13899	106.282	-21.8023	-1.87959
458	25.6066	80.5001	-35.3157	17.8819	-321.962	91.4536	135.244	104.786	53.196	-22.568	3.93006	50.3831	16.0249	-1.90055	1.87476	23.6835	53.9665	48.2181	5.97246	-12.2689	8.10836	105.913	-22.381	-2.21489
459	27.2734	80.6999	-35.14	16.6681	-322.747	90.9232	134.023	104.117	53.196	-22.568	5.3325	49.6303	15.8766	-1.53462	2.16814	23.4046	54.3889	47.7007	5.52916	-12.7977	7.85528	106.182	-22.0812	-3.0225
460	26.8269	80.8031	-34.7483	16.8051	-323.122	90.4848	133.886	102.159	54.808	-22.568	6.98157	49.6512	17.0114	-1.29282	2.73395	22.9355	54.866	47.72	5.90798	-12.7687	8.16478	106.726	-22.1118	-3.09988
461	24.8345	81.348	-34.0696	14.7804	-323.021	88.9518	135.113	101.366	56.42	-22.568	8.7048	48.3004	18.114	-3.0225	1.41211	21.741	55.7397	47.0124	6.69302	-12.4866	8.14544	106.926	-22.107	-4.92788
462	25.958	80.787	-34.6435	15.1673	-324.109	89.1404	135.126	100.557	58.032	-22.568	8.94499	46.856	18.2075	-4.16863	0.401388	21.5105	55.3383	47.9199	6.21265	-12.6993	8.6371	106.996	-21.3284	-5.77418
463	25.2488	81.6188	-34.6516	14.2791	-323.894	88.2119	136.272	99.1251	59.644	-22.568	7.8714	46.1113	18.1173	-3.9623	0.359476	21.7701	55.0837	47.9328	5.86123	-12.8605	8.64999	106.324	-20.0823	-7.29752
464	25.7759	82.0766	-35.0916	12.6945	-323.319	86.5821	136.759	97.8339	58.032	-22.568	8.60969	43.7191	20.1161	-5.1987	0.456196	21.496	55.3706	48.3197	5.95312	-12.4479	8.61292	105.728	-20.4966	-7.31687
465	26.5448	81.3705	-36.4941	11.8756	-324.122	85.9035	137.12	97.4035	58.032	-22.568	9.40118	42.3859	21.8507	-6.76718	-0.132184	21.0527	56.3297	48.5873	6.88324	-13.0604	8.8386	105.604	-20.0468	-8.7854
466	27.4572	82.3829	-36.3442	11.7305	-323.408	85.7197	136.187	95.4304	58.032	-20.956	10.6037	42.3069	24.1075	-6.29808	-0.019344	20.2902	55.8848	48.0247	6.31904	-13.3635	9.02881	106.186	-20.0275	-9.23031
467	28.8838	80.9966	-36.1024	11.3307	-322.215	84.9121	136.536	94.726	59.644	-22.568	10.586	39.6326	24.2219	-7.87784	0.5239	20.3773	56.4861	47.6088	6.69464	-13.6569	8.36144	105.978	-17.7852	-10.8665
468	28.9032	81.1819	-35.4447	10.1895	-322.055	83.9175	137.012	94.5567	61.256	-22.568	11.6257	38.4688	23.3821	-9.06589	0.059644	20.8786	58.3818	47.5556	7.53771	-13.3619	8.93854	106.2	-17.682	-11.1889
469	29.6447	80.5452	-35.0094	10.1975	-320.914	83.8611	136.897	94.0183	61.256	-22.568	10.5328	37.1759	22.6873	-8.61292	0.203112	20.9205	59.0637	46.1516	7.38135	-13.8825	9.11102	105.247	-17.9238	-12.0981
470	30.3717	80.4307	-34.5161	9.5914	-320.03	83.8707	137.392	92.8963	62.868	-22.568	9.65266	36.9035	22.7018	-9.03365	0.78988	19.5519	59.6424	45.5164	6.19008	-13.9003	9.19646	106.447	-16.0507	-13.2619
471	30.3378	81.1819	-32.9154	9.33348	-318.294	82.5102	138.664	91.423	64.48	-22.568	11.126	34.9159	23.7335	-10.4796	-0.174096	19.2118	60.0809	45.1247	6.0853	-13.8954	9.06911	105.649	-16.502	-14.3565
472	29.1853	81.9202	-33.2378	8.75961	-317.422	82.6714	138.057	90.8846	66.092	-22.568	12.2496	33.773	24.9957	-11.2485	-0.922064	18.3704	59.1797	45.2359	6.37385	-14.0663	9.48823	105.668	-15.4413	-15.4607
473	29.44	81.2641	-33.3152	8.24538	-315.399	82.5505	138.908	90.3139	67.704	-22.568	9.77839	32.0627	25.339	-12.8202	-0.248248	18.2785	59.4344	44.2736	6.40286	-13.6262	9.23837	105.807	-14.7047	-15.1592
474	28.0101	80.7725	-33.0508	8.03098	-314.377	82.2862	139.493	87.9862	67.704	-22.568	11.1018	32.1916	26.7785	-13.2829	0.122512	18.1302	59.557	43.8706	7.2411	-13.9277	8.51297	106.71	-13.9809	-15.6686
475	28.3325	81.7187	-34.1148	7.02026	-313.839	82.0234	139.507	88.0297	67.704	-24.18	10.8842	31.3711	27.0606	-14.7353	0.446524	17.8722	60.1212	43.279	6.6495	-14.6128	9.01914	106.984	-13.4344	-16.0958
476	28.0907	81.1787	-33.6328	6.4609	-312.762	81.9041	139.681	86.8513	67.704	-24.18	10.3974	30.0106	28.5775	-16.2006	1.13807	17.4483	60.9578	43.1694	7.00736	-14.6869	8.51781	107.051	-11.5887	-17.1356
477	27.9327	81.5269	-33.1137	6.50603	-312.045	81.8026	141.185	87.3446	67.704	-25.792	10.0669	29.9864	29.8671	-16.7793	0.380432	17.5063	61.8508	42.9066	6.6769	-15.7766	8.58874	108.144	-10.6489	-17.8884
478	28.3583	80.8257	-33.2975	5.8564	-311.127	80.1148	141.429	84.5913	66.092	-27.404	8.8531	30.3008	28.9354	-16.8631	-0.125736	16.976	62.4795	42.8856	7.78918	-14.8417	8.15994	109.037	-10.7698	-18.4058
479	29.4706	80.0761	-34.3952	5.11165	-310.358	80.4388	140.263	83.3565	66.092	-29.016	9.55432	27.936	29.6012	-17.8352	-0.159588	16.6632	61.6767	42.7422	7.55383	-14.3823	7.87301	109.93	-10.0782	-18.912
480	30.8762	80.3179	-35.2319	4.91338	-310.495	80.0003	141.833	83.8143	64.48	-29.016	9.63009	26.8946	31.0213	-18.2559	-0.051584	16.2006	62.0072	42.1635	8.69835	-15.0335	7.72793	109.843	-9.98795	-19.4278
481	31.9224	80.5549	-34.6886	5.02299	-309.198	80.4098	142.312	81.7074	66.092	-29.016	10.0589	24.7877	32.2593	-19.0264	0.027404	15.5139	62.9857	41.7089	8.974	-15.069	6.83004	110.828	-8.42592	-20.0694
482	30.9794	80.3663	-33.981	3.66246	-307.858	78.7543	142.788	82.1153	66.092	-29.016	11.6564	23.7996	32.4028	-19.5455	0.7657	15.846	63.8416	42.4875	8.55811	-14.8933	6.48024	112.688	-8.55166	-20.8383
483	31.1841	80.2437	-33.125	3.43678	-305.746	78.6753	144.567	80.0551	67.704	-30.628	10.7037	20.7803	31.6468	-21.1333	0.372372	15.4252	65.8309	42.0039	8.54521	-14.9239	6.6092	113.341	-8.00519	-20.5095
484	29.7914	79.8956	-32.5011	2.39704	-306.169	78.6914	144.904	79.686	69.316	-29.016	10.1685	19.1844	31.3486	-21.5154	-0.585156	14.8449	67.7104	41.2865	9.00141	-15.2737	6.02888	114.483	-8.09708	-21.6169
485	29.44	79.2556	-33.765	1.42823	-305.571	78.398	144.129	77.6742	67.704	-32.24	9.83642	17.2742	32.3819	-22.2537	-0.264368	14.4951	69.0516	39.9244	9.66072	-15.401	5.66457	115.327	-7.4684	-22.5583
486	29.7092	79.0315	-34.4646	1.71839	-306.087	78.9993	146.476	77.4872	69.316	-32.24	10.9036	14.7224	33.4039	-23.9511	-0.506168	14.4451	70.0946	40.2436	9.90735	-15.227	5.53561	116.262	-6.21265	-23.8512
487	30.6457	77.75	-34.7966	1.54591	-306.357	79.4168	145.996	76.8424	70.928	-35.464	12.1899	13.4731	35.4833	-23.5836	-0.638352	13.4006	70.1575	39.3892	9.87834	-15.1818	4.66513	117.267	-6.26746	-24.1026
488	30.2298	78.5399	-34.571	0.333684	-307.779	79.0122	146.526	77.0955	72.54	-33.852	12.9008	11.2614	35.0223	-23.8818	-0.25792	13.6569	72.1031	39.5343	10.183	-14.5709	4.51038	118.097	-6.11754	-26.3014
489	31.0004	78.1465	-35.148	0.109616	-307.51	79.6086	146.144	75.8962	70.928	-33.852	14.4822	8.95788	35.7461	-24.9538	-1.07843	13.1023	72.598	38.6042	9.28834	-15.6493	4.41688	117.842	-5.24222	-26.9478
490	31.2792	78.1417	-34.3598	-1.07843	-307.832	79.4152	146.568	75.0241	72.54	-33.852	16.4746	5.66134	36.7697	-25.389	-1.17192	12.9669	74.0795	38.0722	10.5264	-15.0416	3.8285	118.471	-5.23578	-28.0262
491	32.0401	78.8381	-33.8472	-1.20578	-310.637	80.0874	148.868	74.2519	72.54	-35.464	17.9351	3.89298	37.9707	-26.2708	-1.66358	12.3818	74.9241	38.0077	10.5151	-15.7122	3.30944	119.037	-5.35345	-28.1133
492	29.5415	78.4286	-32.7026	-1.47337	-312.428	81.4866	148.57	73.3782	75.764	-35.464	18.6976	2.80166	38.5574	-27.0413	-1.41856	12.1835	75.2836	38.8782	10.3426	-15.5107	3.07247	119.93	-5.4937	-29.9413
493	28.1713	76.807	-30.4604	-2.07948	-312.618	80.4372	150.259	73.1929	75.764	-33.852	16.3376	1.42017	37.242	-27.944	-0.986544	11.5903	76.3298	39.3376	10.7021	-16.1958	3.07408	120.386	-5.09553	-31.16
494	27.7554	77.023	-31.2921	-2.60177	-312.207	79.8956	150.011	72.7431	74.152	-35.464	16.0878	0.294996	38.3946	-29.7382	-1.85702	10.7504	77.0987	39.0991	10.9213	-15.3446	2.48248	120.713	-5.08425	-31.787
495	27.8505	77.16	-31.3228	-3.43034	-312.365	79.1653	149.605	71.6953	74.152	-37.076	16.3618	-1.91183	39.3505	-30.0541	-1.45241	10.8568	78.6479	38.2479	12.0529	-15.5381	1.80866	121.305	-4.24923	-34.0454
496	27.1864	76.3701	-31.4904	-3.83495	-312.024	78.7591	151.054	72.5448	75.764	-37.076	16.3795	-2.84518	40.8706	-31.0826	-1.48143	10.4812	79.1605	37.9046	10.9003	-16.3005	2.16975	120.981	-3.88008	-34.2889
497	28.534	76.1654	-33.3958	-4.2444	-312.219	77.7983	150.683	70.8393	77.376	-35.464	15.1592	-4.04451	40.1388	-30.5651	-1.88926	9.14649	79.5038	38.098	10.9906	-16.5423	1.85058	121.427	-3.61733	-34.8901
498	29.7156	76.1606	-32.9702	-4.5265	-309.928	76.7167	151.838	70.8506	80.6	-37.076	13.5182	-3.19176	40.3484	-30.0848	-2.76619	9.66716	79.8456	37.0776	10.8568	-16.2893	1.30894	121.708	-3.31588	-36.083
499	30.6457	76.3056	-33.802	-5.57268	-310.952	76.404	151.367	70.2671	78.988	-37.076	12.2641	-5.00204	34.8095	-24.4637	-3.58992	8.94338	79.9471	36.5811	11.3436	-15.8992	0.794716	122.393	-3.21755	-36.5505
500	31.6565	76.2508	-33.1089	-5.66779	-308.405	77.0875	150.406	71.173	78.988	-37.076	11.7047	-6.08046	34.6209	-25.231	-2.20038	8.2744	82.1088	34.3179	12.7977	-16.0845	0.528736	122.539	-2.8339	-38.0803
501	32.369	75.5158	-31.6016	-6.81231	-306.269	76.7796	150.235	70.4573	78.988	-37.076	11.2195	-8.10675	34.6403	-24.8877	-2.55341	6.85422	84.1287	34.2276	12.1384	-16.3699	0.357864	122.348	-2.53084	-38.2608
502	33.0186	75.2175	-30.9746	-8.27117	-304.703	76.2299	151.688	70.8361	78.988	-38.688	10.902	-10.0702	36.1475	-25.7839	-2.87097	7.48452	85.27	35.0529	12.0707	-16.4763	0.196664	122.409	-2.69365	-39.5923
503	32.8332	74.5437	-31.2631	-8.87567	-303.208	75.2159	150.343	69.2886	82.212	-38.688	9.35444	-12.7896	35.8251	-27.3379	-2.48409	6.76879	85.8132	34.6064	12.3882	-16.3505	0.311116	123.038	-2.77425	-40.7546
504	31.8934	73.1929	-29.9961	-9.70908	-301.062	74.476	150.338	68.1489	83.824	-40.3	7.45066	-13.9051	34.6902	-26.5706	-2.61789	6.36579	86.2033	34.0777	12.2883	-16.3554	-0.151528	123.805	-1.50077	-41.1012
505	31.6387	74.9129	-30.009	-10.3474	-299.953	73.6813	150.217	67.1221	83.824	-40.3	6.53988	-15.5461	34.8015	-26.9849	-2.00694	5.78869	87.0432	34.2663	12.4914	-16.3779	-0.415896	123.324	-0.872092	-42.8196
506	30.707	74.1069	-29.0531	-10.1379	-299.83	71.1698	151.829	66.495	82.212	-40.3	7.37974	-16.473	35.1738	-25.8178	-1.2767	6.11109	86.8804	33.4571	13.3893	-16.5488	-0.046748	123.624	-0.989768	-43.6788
507	31.4066	73.6491	-29.4529	-11.4371	-299.885	69.8899	153.006	67.0092	85.436	-41.912	5.8967	-17.6288	35.1916	-26.7141	-0.889824	5.8838	87.3511	33.5441	13.1507	-16.6729	-0.577096	124.116	-1.40889	-44.5122
508	31.7016	73.6958	-29.7172	-11.2082	-299.669	68.0554	152.764	64.7057	87.048	-41.912	6.0579	-19.3907	34.2905	-28.5485	-2.12784	4.63934	87.9427	33.1508	13.0572	-16.5133	-0.407836	124.562	-1.69905	-44.5122
509	32.0369	74.4744	-25.7984	-11.471	-299.163	66.5708	154.017	64.5687	85.436	-41.912	5.47274	-19.639	34.9675	-27.8102	-2.30838	4.97463	86.9013	33.3378	12.9766	-15.9991	-0.490048	124.877	-1.29121	-46.5723
510	31.7741	75.124	-25.6082	-11.4468	-299.057	67.0979	155.776	64.2076	88.66	-43.524	5.62588	-20.0694	34.9594	-28.526	-2.68398	5.08425	86.558	34.3872	13.2603	-17.1356	-0.560976	124.39	-1.10744	-46.4981
511	30.873	72.8801	-25.3519	-12.6558	-299.042	63.7175	154.594	63.0082	88.66	-43.524	6.02243	-21.9796	35.4269	-28.5534	-2.23101	4.69576	85.9792	33.981	13.5666	-16.7696	-0.962364	124.795	-0.857584	-48.1214
512	30.5329	72.8463	-26.2837	-12.9492	-299.226	63.1388	155.911	62.5714	87.048	-45.136	5.55818	-22.4906	35.9379	-29.3352	-1.50561	3.52867	86.8562	34.7547	14.1534	-17.4032	-0.739908	124.461	-0.976872	-48.389
513	30.1444	72.6593	-25.7759	-13.1491	-300.296	61.5816	154.912	62.0556	90.272	-46.748	4.54745	-22.8791	34.5452	-27.944	-1.96825	4.08158	86.9835	35.4237	13.3522	-17.1468	-1.37826	125.041	-1.47176	-48.3068
514	30.5667	72.8398	-26.9285	-13.7197	-300.154	61.9733	155.843	62.3925	88.66	-46.748	3.75274	-23.374	35.0723	-28.692	-2.42284	4.13639	86.2533	36.9487	14.0067	-16.9518	-1.59104	124.493	-0.754416	-49.3482
515	32.535	71.5809	-27.3782	-14.6386	-300.57	63.0356	154.783	62.1652	88.66	-46.748	3.16919	-23.8254	33.6811	-28.8677	-2.80166	3.8688	86.1034	36.8213	15.1125	-16.7342	-1.43468	124.571	-1.27187	-50.4991
516	32.3948	72.4288	-27.9875	-15.1899	-301.146	63.6434	155.492	62.6584	88.66	-48.36	4.18475	-24.9763	36.0379	-30.2105	-1.85219	3.97842	87.106	37.0921	13.8632	-17.7175	-1.60716	124.48	-0.261144	-51.2955
517	33.6021	70.8506	-29.4835	-15.4059	-300.574	66.6949	155.622	61.5768	91.884	-48.36	4.42333	-24.957	36.1136	-30.3991	-2.52762	2.69849	87.8234	37.0905	14.0389	-17.4273	-1.7055	124.259	-0.267592	-51.1681
518	33.3039	69.2467	-28.9805	-15.6235	-300.241	67.9635	155.977	61.7799	91.884	-48.36	2.89999	-25.8662	36.5247	-31.4662	-2.67914	3.28848	88.1893	37.4742	14.9126	-17.8722	-1.21061	124.556	-0.243412	-51.1697
519	33.4184	69.1145	-30.2589	-16.8954	-304.32	70.7749	155.543	61.2173	93.496	-48.36	2.65013	-25.7517	36.831	-33.8053	-2.65819	2.15363	87.7283	37.3371	15.1738	-17.5015	-1.53946	124.777	-0.307892	-52.5125
520	32.8655	68.2311	-30.1396	-17.4144	-305.16	72.5916	156.393	61.9443	93.496	-49.972	2.14396	-25.5873	36.1894	-33.91	-3.04023	1.61684	88.5327	36.1926	16.0861	-17.0501	-1.58943	124.791	0.235352	-52.5206
521	32.0804	66.4708	-28.5131	-18.4751	-305.933	72.8044	158.487	59.565	93.496	-51.584	2.8613	-25.3181	37.9997	-33.3603	-2.44863	1.55074	89.5015	34.8724	16.2328	-17.6014	-1.8006	124.738	-0.164424	-53.7247
522	31.5855	67.4799	-28.7678	-19.7454	-307.218	72.59	158.63	60.1308	93.496	-51.584	2.52762	-25.5808	37.8014	-34.5452	-1.89894	1.38954	91.4568	33.5328	15.6831	-17.8964	-2.21328	125.51	0.117676	-54.318
523	31.4533	66.0388	-29.5641	-20.3064	-307.955	73.2928	161.421	60.3581	95.108	-51.584	2.37609	-25.1279	38.1496	-33.4119	-1.93118	1.07198	93.625	32.7268	15.393	-18.8523	-1.55719	125.244	-1.14774	-54.1858
524	31.1148	66.7545	-29.7914	-21.093	-308.042	73.8103	161.355	59.4038	91.884	-53.196	1.65552	-24.6555	37.4161	-34.147	-2.81455	0.820508	94.1811	32.5237	15.1238	-18.3446	-1.68615	125.604	-0.253084	-54.8676
525	31.5017	64.4671	-29.2062	-22.5019	-308.643	73.533	162.375	59.6456	93.496	-53.196	1.03813	-25.5808	37.7885	-34.3372	-2.8613	0.546468	94.2569	32.5463	16.0894	-18.1366	-2.123	125.705	-1.68293	-54.5678
526	32.5044	64.2898	-28.3873	-23.3127	-308.032	74.2471	163.109	60.0744	96.72	-53.196	1.7055	-25.2101	38.1157	-34.824	-2.81939	0.196664	94.6308	31.9611	16.4746	-18.0189	-1.67003	125.965	-2.03112	-53.2266
527	32.8606	65.444	-27.2364	-23.8044	-307.574	73.8506	163.924	60.8869	98.332	-54.808	1.19933	-24.8909	38.7073	-34.924	-3.1305	0.715728	94.9839	32.2674	17.7272	-17.2452	-1.77481	126.295	-1.03168	-54.571
528	32.5334	64.8653	-28.0601	-24.9489	-308.522	74.0746	165.169	60.1389	98.332	-54.808	0.9269	-24.3589	38.7476	-34.7725	-2.55824	-0.66898	96.0816	32.1513	17.1742	-18.4864	-1.75547	126.798	-1.62328	-54.347
529	31.9982	63.8965	-27.8683	-25.5824	-308.405	74.4599	166.141	60.3259	98.332	-54.808	-0.243412	-24.4444	38.3962	-34.8998	-2.7275	-1.70388	97.6533	31.9934	16.8841	-17.8126	-1.46047	127.072	-1.26058	-54.3051
530	31.7661	64.1463	-27.3347	-26.7834	-309.016	75.6334	166.297	60.2034	98.332	-56.42	-1.48304	-24.1526	37.4629	-34.6354	-3.60604	-1.65875	99.1219	32.3109	16.3924	-18.4461	-0.875316	126.85	-0.938184	-54.4292
531	29.8655	63.674	-25.6195	-27.4701	-310.316	75.822	164.742	59.6134	96.72	-56.42	-0.976872	-24.8667	36.9938	-34.3404	-4.40237	-1.07682	98.9704	32.4254	16.2844	-18.5396	-1.58782	127.142	-0.686712	-54.16
532	29.2852	63.9222	-25.3745	-28.1778	-310.236	76.7796	164.69	61.7009	98.332	-54.808	-1.10744	-24.3444	36.9148	-34.0664	-4.51521	-0.45136	98.6592	32.0127	16.9324	-18.3784	-1.3428	127.319	-0.103168	-54.8789
533	29.0176	64.1141	-25.0134	-28.8548	-310.5	75.8817	164.459	61.9298	96.72	-56.42	-1.13807	-24.9618	37.7095	-34.5855	-4.34434	-2.38254	97.8355	32.1288	16.4666	-17.89	-1.1284	127.677	0.544856	-53.6812
534	27.4749	63.8191	-26.764	-29.5222	-310.258	74.9677	168.275	62.8986	96.72	-56.42	-0.836628	-24.8554	37.7289	-34.55	-2.47442	-1.21061	97.5308	31.9418	17.192	-18.1205	-0.91078	128.167	1.20578	-55.1288
535	27.6942	63.6031	-26.8656	-29.7478	-309.381	74.2149	170.661	63.969	96.72	-56.42	-2.16169	-24.3444	37.7627	-34.4726	-2.37125	-1.81995	97.4196	31.0084	17.7497	-18.5912	-0.99944	128.306	0.440076	-55.045
536	28.5711	63.5966	-26.569	-30.844	-308.687	72.8963	172.718	65.3344	95.108	-56.42	-2.65174	-24.7942	38.3479	-35.6784	-2.1359	-1.75708	97.3342	31.7338	16.6068	-18.8185	-1.2493	128.378	0.736684	-54.7758
537	27.5926	62.4166	-26.9849	-31.5613	-309.349	72.1015	173.588	65.7438	96.72	-54.808	-1.93279	-25.7517	39.2345	-37.1711	-2.41155	-2.39221	97.9596	32.556	17.9754	-18.8088	-1.60878	128.338	1.45402	-54.6613
538	26.8398	61.2125	-25.9645	-31.3018	-308.753	71.4245	173.45	68.0393	95.108	-56.42	-0.267592	-26.5625	41.0125	-37.5274	-2.00372	-2.01339	97.7984	33.1959	17.4692	-18.6541	-1.60072	128.702	1.20739	-54.3405
539	25.7453	60.4774	-27.4685	-32.8864	-308.044	70.014	174.122	67.8604	98.332	-54.808	2.22456	-29.3303	41.5122	-38.306	-2.23423	-2.6872	97.3922	32.5205	17.2581	-18.3575	-1.70227	129.266	0.697996	-54.7596
540	24.878	60.8288	-26.0451	-32.3738	-307.605	68.8131	175.589	69.5401	96.72	-58.032	3.89943	-30.7795	41.4268	-38.7541	-2.60983	-2.8081	96.151	33.4232	17.8932	-16.9711	-1.69905	129.487	0.981708	-54.1874
541	24.604	59.8648	-26.6222	-34.3098	-308.114	67.2607	176.163	71.2971	101.556	-58.032	1.40566	-32.8832	42.1538	-38.4639	-2.69849	-3.13212	96.5943	33.3926	18.156	-18.0754	-1.46692	129.655	0.699608	-53.1573
542	25.2294	59.2958	-27.5571	-34.5758	-307.658	65.9904	178.111	72.3321	99.944	-58.032	1.71356	-33.5393	42.4681	-38.5719	-3.03378	-3.77692	95.4111	34.1389	18.1721	-18.6605	-1.74418	129.132	1.1816	-53.6651
543	25.6147	57.4823	-28.0794	-34.5065	-308.234	65.0361	178.211	73.4524	96.72	-59.644	0.391716	-35.3834	42.6487	-39.5972	-3.32556	-3.00638	95.8398	33.6876	17.7078	-18.2172	-1.13162	129.992	0.191828	-52.4384
544	26.1773	56.1073	-29.2933	-35.111	-310.189	62.4618	180.225	75.3546	96.72	-59.644	0.122512	-36.407	43.2435	-40.0453	-3.37392	-3.31911	95.0097	33.6876	18.2591	-18.3301	-1.45564	130.132	1.07843	-51.9886
545	25.9468	55.3432	-28.8032	-36.2877	-309.984	57.3082	179.456	75.3691	98.332	-59.644	0	-38.1415	44.7088	-39.0636	-2.52762	-3.4384	95.7738	33.0799	18.3188	-18.2462	-1.56203	130.472	0.190216	-52.7833
546	25.8291	53.7666	-28.347	-36.2426	-310.51	54.355	181.026	76.2379	99.944	-58.032	-1.86831	-39.7987	43.5288	-40.1211	-2.03434	-4.3653	97.2117	34.0906	17.7691	-18.3284	-1.55397	130.437	0.46748	-52.1369
547	25.1085	52.7446	-29.3094	-36.7391	-311.337	51.5727	179.891	78.8187	96.72	-59.644	-4.37819	-41.1979	43.0291	-40.163	-2.56469	-4.78925	97.4647	33.2427	18.0673	-18.48	-1.53301	130.628	0.25792	-52.4384
548	24.9393	51.3841	-28.2842	-37.6515	-309.967	48.8097	177.541	80.5871	96.72	-58.032	-5.17291	-42.157	44.6863	-39.7987	-3.18048	-4.61838	97.0682	33.2507	18.1576	-18.8233	-1.49755	131.202	0.117676	-51.9225
549	25.5373	51.4518	-29.0257	-36.9744	-309.016	46.8834	178.24	81.4834	98.332	-59.644	-4.52972	-42.6438	46.9108	-39.2055	-2.67592	-4.72477	95.9575	33.2378	19.0716	-18.3929	-1.46208	130.928	0.543244	-51.9435
550	25.4164	50.562	-28.8612	-37.8385	-308.305	45.2472	176.317	83.2259	99.944	-59.644	-6.64144	-42.3198	46.2144	-38.3624	-2.46797	-5.3728	96.375	32.2948	17.8513	-18.4945	-1.37665	131.363	0.001612	-52.2562
551	25.3648	49.9478	-27.7151	-38.6364	-306.98	43.6739	174.718	85.2216	101.556	-59.644	-8.46139	-42.4923	45.5245	-38.3479	-1.83768	-4.76346	96.375	31.4308	17.711	-18.962	-1.60555	131.509	-0.1209	-50.4846
552	24.4202	49.9075	-27.0074	-38.8524	-305.788	43.9834	174.041	86.4242	101.556	-58.032	-10.0266	-42.8615	46.0726	-38.1286	-2.41478	-4.96657	96.13	30.7924	17.3516	-19.9018	-1.71356	131.407	0.133796	-51.6549
553	24.878	48.2439	-27.778	-39.1023	-305	44.8039	172.063	88.1619	101.556	-58.032	-11.0825	-44.517	46.7206	-38.3334	-3.31911	-5.70648	95.9446	30.8521	17.3242	-18.9313	-2.18265	131.668	0.06448	-50.4266
554	24.4444	47.9377	-27.1364	-39.9034	-304.32	45.2682	170.978	89.4257	104.78	-59.644	-11.2437	-45.3439	47.6878	-38.501	-3.83172	-5.61621	96.0317	31.4856	17.8706	-18.6621	-1.88282	131.787	0.27404	-50.8779
555	23.2789	48.2327	-26.2514	-39.4376	-303.309	46.9076	169.587	91.0764	104.78	-59.644	-13.2732	-45.5664	46.9108	-39.3022	-3.07247	-5.42116	95.9059	30.6312	17.9996	-18.3978	-1.82478	131.513	1.06714	-50.6748
556	22.8533	47.3541	-25.1311	-41.6057	-302.634	47.151	169.17	93.7845	106.392	-61.256	-14.5273	-45.223	47.1994	-37.3355	-3.34651	-6.06112	96.6378	31.081	17.6288	-18.5767	-1.82156	131.991	1.00105	-50.9086
557	22.3133	46.6384	-24.7764	-41.9668	-301.876	47.8635	168.381	94.7227	104.78	-62.868	-15.2656	-46.345	47.8216	-37.5789	-2.65013	-5.9918	97.6679	31.2631	16.9534	-18.9652	-1.68938	131.708	1.72645	-50.4927
558	22.0199	46.6271	-25.0215	-42.1248	-303.021	49.2595	167.782	94.9919	106.392	-61.256	-15.2801	-45.4955	49.4014	-37.4081	-2.57275	-5.91443	97.1665	32.0659	17.8593	-19.6906	-1.38632	131.676	1.64102	-51.4341
559	22.1698	46.7496	-25.1504	-43.7271	-303.611	48.3826	164.532	94.8033	106.392	-61.256	-14.7659	-45.6244	50.6426	-37.5725	-3.74145	-5.58074	97.6517	32.7204	16.9937	-19.5197	-1.63457	131.534	1.68776	-52.3416
560	24.1558	45.9759	-25.418	-44.301	-304.349	49.4658	162.899	96.5781	106.392	-62.868	-14.4048	-47.3976	51.9483	-37.076	-3.43034	-7.46195	97.1085	32.8606	17.2887	-20.1613	-1.33635	131.378	1.70388	-52.8655
561	24.9602	45.3278	-25.3487	-43.7835	-305.513	50.8554	160.271	95.6593	106.392	-64.48	-15.9701	-46.4998	52.1434	-37.205	-3.49965	-6.58824	95.8721	33.5715	17.3097	-20.1339	-1.33474	131.272	1.33796	-53.9972
562	26.0515	43.9093	-25.1246	-44.3526	-306.085	51.1552	157.966	95.1306	106.392	-62.868	-17.8593	-46.3805	53.4974	-37.4871	-3.48676	-6.19653	94.2794	33.5232	17.3097	-19.4585	-1.61361	131.931	1.82478	-52.951
563	26.7818	44.172	-24.5717	-45.0651	-305.945	51.821	156.967	94.1908	106.392	-62.868	-17.79	-44.87	55.2158	-36.3603	-2.73718	-6.16751	93.7007	33.6279	17.0211	-20.3402	-1.50238	132.116	1.83446	-54.1197
564	26.7189	43.6352	-25.684	-46.179	-306.936	51.8177	156.572	95.856	106.392	-62.868	-17.682	-45.4487	56.773	-34.8514	-2.87903	-7.70858	94.2472	34.1002	16.3957	-19.7889	-1.33474	132.437	2.7807	-53.9278
565	25.1682	42.6455	-24.1558	-46.5384	-305.709	54.0584	155.015	95.3627	106.392	-62.868	-17.84	-46.6835	58.0304	-33.1701	-2.88387	-8.0874	94.0457	34.529	16.6568	-19.6406	-1.48143	131.982	2.70977	-56.4522
566	24.8087	42.4101	-23.4433	-47.2235	-305.853	55.2287	152.977	95.0661	108.004	-61.256	-20.719	-46.1258	57.4855	-31.5162	-3.0096	-7.87784	94.9049	35.1513	16.7116	-19.6471	-0.59644	132.671	2.53084	-56.4925
567	24.4234	41.4913	-23.5416	-48.2165	-306.356	55.9138	149.471	93.3267	109.616	-62.868	-21.0011	-47.1945	58.2093	-31.455	-3.63828	-8.06967	93.2332	35.3931	16.9937	-19.6503	-0.780208	132.805	2.90966	-58.1432
568	23.8028	41.5461	-22.1924	-48.8565	-305.682	57.679	145.91	91.2392	108.004	-61.256	-20.9125	-47.9393	58.5736	-31.2728	-3.84784	-8.05678	90.6847	35.8477	17.0501	-19.8502	-0.299832	132.245	0.333684	-59.4731
569	24.1091	40.6837	-22.7566	-49.3433	-307.805	55.4689	145.573	89.4225	108.004	-62.868	-21.0672	-47.828	59.8471	-29.4657	-2.5921	-8.1132	91.4617	36.652	17.1855	-19.7019	-0.522288	132.032	-4.7425	-64.9652
570	24.3944	40.1211	-23.0887	-50.1413	-309.533	54.2535	145.449	88.2215	108.004	-61.256	-21.4106	-47.0946	60.9417	-29.1079	-2.75813	-9.4028	91.8018	37.7901	17.5853	-19.7986	-0.109616	132.339	-7.08474	-67.4896
571	24.5363	40.5837	-23.1725	-50.2686	-310.732	52.4561	145.851	85.9873	106.392	-62.868	-21.0946	-48.194	61.4301	-29.8027	-4.13639	-9.83804	92.1935	36.9309	17.4386	-18.9894	0.41912	132.403	-8.87567	-70.5057
572	25.0086	39.7229	-21.6105	-50.8779	-310.59	50.8554	143.247	83.0099	108.004	-62.868	-22.6099	-48.7356	62.2232	-28.6533	-4.09609	-9.42536	90.9571	38.3479	17.4354	-19.3359	1.08165	132.152	-10.9197	-72.0274
573	25.4809	38.8556	-21.9603	-51.6066	-311.406	50.2106	139.598	78.153	108.004	-61.256	-24.3025	-48.2294	62.012	-27.7828	-4.61354	-10.046	90.0447	37.9078	18.4203	-19.6422	2.15041	131.483	-12.2238	-72.864
574	24.1736	38.3898	-21.0688	-52.3449	-312.043	48.9855	137.026	74.6211	108.004	-62.868	-23.8028	-49.0822	62.0813	-28.8177	-5.61782	-10.3797	89.9012	39.0523	17.7062	-19.3553	2.20522	131.625	-13.0846	-73.5056
575	23.9817	37.5548	-20.4563	-52.411	-312.897	48.468	132.655	67.92	108.004	-61.256	-23.6142	-48.8468	63.0324	-28.26	-4.28308	-11.2324	90.1527	39.9131	17.3725	-19.7373	3.56252	130.931	-13.723	-75.1015
576	23.4562	36.241	-20.6787	-52.6689	-314.97	48.4229	131.646	65.3247	108.004	-61.256	-23.7254	-49.5819	63.4757	-28.4002	-3.24818	-11.6225	91.0441	39.5891	17.5982	-19.9888	3.92361	131.394	-13.8551	-75.9639
577	23.5465	35.6881	-20.9963	-53.2524	-317.227	48.1569	131.268	64.4768	108.004	-62.868	-26.5899	-50.3154	62.8358	-28.4599	-4.49426	-11.5322	91.6615	40.2903	18.5509	-19.747	5.03105	130.37	-14.1824	-77.2132
578	23.9608	35.8863	-20.424	-53.8021	-319.511	48.8791	130.042	63.5209	108.004	-61.256	-27.7957	-49.8205	62.3989	-27.0349	-4.95045	-11.0535	90.3881	40.6788	17.8223	-19.2811	5.57591	130.506	-14.9481	-77.908
579	24.8973	34.9353	-20.2354	-54.268	-321.734	48.3004	130.108	62.0523	109.616	-62.868	-28.0456	-50.3508	63.5112	-27.0042	-5.33088	-12.4463	90.4719	40.6192	17.5644	-20.387	5.7758	129.916	-15.9056	-78.9364
580	24.3573	33.5618	-19.5632	-54.8419	-323.685	48.3374	129.969	61.3382	109.616	-62.868	-27.6136	-49.216	64.2817	-26.087	-4.81021	-13.0653	89.9609	40.7304	17.977	-20.1161	6.10787	129.879	-14.6063	-80.2728
581	23.6432	33.1669	-19.8679	-54.3711	-326.617	48.3181	129.855	60.9546	111.228	-62.868	-28.7258	-49.5819	63.7707	-26.7302	-4.10254	-12.6284	89.553	41.0544	17.6981	-20.5046	6.67046	129.191	-14.4532	-82.4877
582	24.5637	32.0385	-19.589	-54.9885	-329.201	48.6534	130.636	61.0126	108.004	-64.48	-29.7511	-49.9462	64.862	-25.7259	-3.43195	-11.5822	90.3139	40.7691	17.5901	-20.5304	7.2008	129.363	-13.9245	-85.5875
583	25.1553	31.3308	-19.365	-54.8112	-330.502	46.7673	131.399	61.3753	109.616	-62.868	-29.2223	-51.3841	64.9717	-25.7017	-3.84784	-11.8466	90.1269	41.1882	17.603	-20.1613	7.67957	129.353	-13.2216	-87.3011
584	22.884	30.3346	-18.4332	-54.9756	-331.524	44.7846	131.146	60.7563	108.004	-62.868	-28.6888	-50.6168	66.3209	-25.1553	-4.44106	-12.3753	89.1936	42.0216	17.1323	-20.1935	8.3147	128.397	-14.5144	-87.4671
585	22.5583	29.3787	-19.768	-55.4818	-334.397	43.8367	131.921	60.8127	109.616	-62.868	-28.4728	-51.0891	68.352	-25.655	-4.39431	-12.4414	87.6299	43.0436	17.5337	-19.718	8.39046	128.407	-12.8589	-88.9921
586	21.9861	29.7237	-19.6229	-55.635	-335.665	43.5643	132.811	60.9288	108.004	-61.256	-29.9639	-50.7716	67.4896	-25.4648	-6.03049	-13.4376	86.6418	42.9259	17.1726	-19.9646	8.26795	127.685	-13.2426	-90.9893
587	23.0371	28.6017	-19.6616	-55.8477	-337.155	43.2967	134.123	61.0352	108.004	-61.256	-29.7736	-50.0091	68.6486	-23.345	-5.75968	-13.7036	85.6504	42.9695	17.8078	-19.6148	8.79024	127.709	-12.514	-93.1575
588	23.6126	28.1278	-19.6583	-55.5818	-337.911	42.2763	134.455	61.7122	106.392	-62.868	-32.1143	-50.8941	67.301	-23.864	-5.24706	-12.7558	84.8299	41.9974	17.3693	-19.4165	9.00463	127.811	-11.795	-94.8388
589	23.4417	26.8043	-19.0958	-54.679	-338.899	42.0426	133.262	60.579	106.392	-64.48	-31.945	-51.2149	67.5912	-23.9285	-4.79892	-13.8084	85.9132	41.8524	17.9206	-20.3031	8.67901	127.246	-11.5177	-96.8022
590	21.0479	26.4158	-19.7083	-52.3271	-339.961	42.7696	134.062	61.0061	106.392	-64.48	-31.8483	-51.8613	68.0296	-25.3648	-4.66029	-12.8428	85.0185	41.1447	17.3	-20.279	8.94821	126.676	-10.9955	-98.1563
591	21.7894	25.1972	-19.9275	-51.4647	-341.462	43.2177	135.982	60.4371	106.392	-66.092	-32.5834	-51.015	67.8894	-22.8017	-5.56462	-14.6918	85.7004	41.0738	16.7535	-20.1774	9.44954	126.6	-11.2211	-100
592	21.114	23.9011	-19.7389	-51.9951	-342.368	41.8894	135.144	59.5956	104.78	-64.48	-34.284	-51.1713	67.272	-21.9861	-5.66296	-14.4193	85.8084	41.5026	17.1936	-20.3338	9.43826	126.434	-11.1099	-101.166
593	21.6653	23.3111	-18.9394	-52.664	-342.787	40.5289	134.468	60.126	104.78	-66.092	-34.2018	-52.9993	67.1092	-22.6986	-5.85962	-13.278	84.6107	41.8878	17.495	-20.7303	9.04493	125.852	-9.5785	-103.236
594	22.1698	22.8582	-17.6175	-53.5071	-343.67	37.2711	135.913	58.6832	104.78	-64.48	-35.5849	-52.9687	67.7298	-21.6395	-6.88485	-13.8148	84.3157	41.2624	17.2097	-20.3837	8.84827	125.746	-9.16583	-105.065
595	23.669	21.7185	-14.429	-53.5797	-344.499	34.2276	135.408	58.4414	104.78	-66.092	-35.7413	-54.0278	67.4026	-20.7674	-6.34644	-14.4596	83.3791	41.2092	18.1334	-20.2757	9.60268	125.952	-10.1346	-106.411
596	22.8179	21.7249	-16.8954	-54.089	-346.63	32.9412	134.268	57.9466	104.78	-64.48	-35.4608	-52.7011	68.9114	-20.2403	-6.56406	-15.3607	82.1894	41.1882	17.9174	-20.8448	9.53176	125.146	-9.23354	-108.541
597	22.7582	20.8415	-16.1119	-53.7731	-347.662	30.1992	133.619	57.8853	106.392	-64.48	-35.5188	-53.8569	68.5842	-20.5852	-5.2116	-14.4193	82.2716	41.9249	17.4338	-20.4257	8.94821	124.73	-7.28302	-109.54
598	21.2042	20.2951	-13.7536	-54.0955	-348.64	28.1036	130.163	56.6715	103.168	-66.092	-37.2259	-51.8516	67.6524	-19.9098	-4.68286	-14.6837	82.0685	41.5058	18.0883	-20.6578	8.91114	124.227	-6.7833	-111.222
599	20.6578	19.5713	-13.8213	-52.685	-349.538	26.6093	133.066	57.6403	103.168	-66.092	-37.8465	-52.9558	67.5299	-20.2725	-5.20837	-14.9013	80.8966	41.9168	17.2935	-20.7448	8.66289	122.815	-6.98802	-113.106
600	19.4182	18.8668	-14.2356	-54.492	-350.847	23.9914	126.403	55.3577	101.556	-66.092	-37.2743	-51.8371	68.2763	-18.2575	-5.62104	-15.8282	79.2782	41.0963	17.6514	-20.2516	8.44043	123.289	-6.6221	-114.463
601	19.9646	18.0222	-14.4693	-54.0181	-352.351	21.5863	125.784	55.8897	103.168	-66.092	-36.0991	-53.412	68.2682	-18.1382	-5.8032	-15.746	78.4689	41.5541	17.2113	-21.2171	8.2083	122.931	-6.13527	-116.826
602	19.9114	18.2672	-14.7595	-54.5823	-354.181	19.6229	124.193	55.1723	103.168	-67.704	-37.4645	-52.6334	66.7432	-17.7256	-4.92305	-15.0738	78.4947	41.2624	17.595	-20.4531	8.05516	122.27	-4.7828	-117.533
603	18.8072	16.7519	-14.4064	-54.1148	-357.324	18.3462	123.349	55.7043	103.168	-66.092	-38.6316	-51.7742	66.761	-17.595	-4.92466	-15.767	79.2717	41.4816	17.3822	-21.7443	8.01325	121.943	-3.97036	-120.539
604	18.6283	16.415	-15.0029	-53.7586	-359.078	15.7009	122.278	54.8032	101.556	-67.704	-39.2312	-53.0735	67.272	-17.1726	-5.78708	-15.4301	77.8628	41.4768	17.2178	-20.819	8.09708	121.972	-2.38576	-121.084
605	18.6589	15.6412	-15.5703	-53.5248	-360.909	13.681	121.248	55.0079	101.556	-67.704	-39.6955	-53.0203	67.3074	-15.7799	-6.64628	-15.7363	78.0095	41.6073	17.3757	-21.4912	7.24272	121.387	-1.94085	-123.515
606	18.4735	15.6638	-14.2984	-53.9053	-361.941	12.0078	120.439	55.232	101.556	-67.704	-39.1893	-55.0627	67.8765	-15.2882	-6.57535	-15.4833	77.3679	42.0152	17.6417	-21.3139	7.82304	121.034	-1.56525	-124.986
607	18.8072	15.3285	-15.0013	-53.815	-363.933	10.5731	119.965	54.7758	103.168	-67.704	-40.0727	-55.3706	67.6331	-14.9755	-6.53021	-15.8621	76.9359	42.4069	17.8932	-21.0027	7.80692	121.635	-0.536796	-125.652
608	18.5976	14.5435	-15.185	-54.9353	-365.092	8.87245	119.149	54.829	103.168	-67.704	-40.9013	-54.3067	68.4101	-14.8191	-6.68335	-15.9185	76.6522	41.7008	17.4015	-20.5046	7.45389	120.915	-0.581932	-128.241
609	18.7089	14.2049	-15.7218	-54.4243	-367.731	6.98157	119.148	54.7725	103.168	-66.092	-43.3418	-57.5452	68.892	-15.7234	-6.0853	-16.1684	77.0246	42.1586	17.2984	-21.9135	7.13149	120.753	-1.10906	-130.233
610	18.4687	13.7665	-15.6445	-54.2712	-369.694	5.56301	117.645	55.0143	101.556	-67.704	-45.4036	-58.9589	69.0678	-13.8793	-5.25834	-16.0555	78.203	42.3053	17.4934	-21.6975	7.59252	120.341	-1.06714	-132.848
611	19.344	13.2668	-16.0394	-53.9085	-370.916	3.85429	116.452	54.6371	101.556	-67.704	-45.855	-60.8401	69.5094	-13.5892	-6.24489	-16.6858	76.9214	42.9808	17.7642	-20.769	6.71237	120.397	-1.28799	-134.534
612	18.6379	13.0991	-16.1716	-52.4206	-371.635	3.48998	115.505	54.3679	99.944	-69.316	-48.6437	-60.982	69.5707	-14.2855	-5.78224	-16.0636	76.4362	43.121	18.0254	-21.0527	6.48346	120.329	-1.03329	-135.622
613	18.3123	12.4624	-15.7879	-52.4964	-372.403	2.46314	114.125	54.5598	98.332	-69.316	-50.288	-60.853	68.5245	-12.6284	-5.73066	-16.3731	74.426	43.4918	18.4235	-21.1559	6.07563	119.83	-0.020956	-137.616
614	17.4821	11.7821	-15.3221	-51.7726	-372.446	0.361088	113.561	54.3905	96.72	-67.704	-50.5265	-63.2839	68.8066	-12.9395	-5.54367	-16.2876	73.4185	43.3999	18.2672	-21.5331	5.94183	119.02	0.446524	-138.555
615	17.4015	11.9901	-15.7299	-52.4545	-373.352	-2.71138	113.699	54.966	98.332	-67.704	-50.1735	-63.005	70.0736	-11.6999	-5.19064	-17.4257	73.296	42.5262	18.5316	-21.5847	6.61726	118.735	0.707668	-139.854
616	17.5208	11.392	-16.0636	-51.4728	-374.323	-4.31049	113.114	54.679	98.332	-69.316	-49.5368	-63.8948	70.4831	-12.0868	-5.92894	-18.1092	72.8963	41.9039	17.6466	-21.9748	5.90476	119.267	0.875316	-141.727
617	17.5789	11.8434	-17.1162	-50.9102	-375.398	-6.63499	112.913	55.2094	98.332	-69.316	-51.7307	-64.1463	69.4643	-10.6602	-6.24166	-17.0695	73.5749	42.855	18.4671	-21.3654	5.63233	118.638	1.41534	-142.614
618	17.7239	11.3275	-16.0007	-49.7608	-376.723	-7.98424	114.001	55.7349	98.332	-69.316	-51.9096	-63.9497	68.2908	-9.44471	-6.39319	-16.7648	72.2789	41.5267	17.6353	-21.4251	5.98052	119.172	2.3648	-143.258
619	17.948	11.0325	-16.3489	-49.922	-377.493	-11.155	114.937	55.5479	96.72	-70.928	-50.944	-63.832	68.6003	-9.39151	-6.78974	-17.4821	71.605	41.7524	17.5998	-21.6072	5.78547	118.397	2.07787	-144.072
620	18.9265	11.1905	-16.1426	-49.9446	-378.549	-12.2367	114.413	55.2352	96.72	-70.928	-49.1176	-64.4913	70.2735	-10.3281	-6.01115	-17.7578	72.1193	41.3542	17.9899	-21.4074	5.84834	119.064	2.5792	-145.277
621	17.9964	10.6666	-15.5832	-50.8989	-379.886	-13.9583	114.176	55.8252	98.332	-69.316	-49.8737	-65.5633	69.5288	-9.3625	-6.18041	-17.7884	71.9855	40.4096	18.2301	-21.3171	6.09658	118.588	2.57275	-146.234
622	16.9324	10.3958	-15.7363	-50.5523	-380.958	-14.5177	114.412	55.7397	99.944	-67.704	-49.569	-65.3247	69.4079	-9.84287	-7.30558	-17.221	70.6459	40.2855	17.5337	-22.4922	5.48402	117.723	2.06981	-146.837
623	16.3924	10.3265	-15.7879	-50.5169	-382.797	-17.0662	114.283	55.7268	98.332	-67.704	-48.9822	-66.8158	69.266	-9.66555	-7.63604	-17.7626	69.5062	40.1517	17.5386	-21.791	6.76073	118.163	2.21972	-147.071
624	15.3495	10.3023	-15.8895	-50.6797	-384.525	-17.5547	113.767	55.7671	98.332	-69.316	-50.3234	-67.5331	69.4305	-10.4764	-7.07346	-16.4537	69.7029	40.242	17.005	-22.1489	5.68714	118.43	2.43896	-147.669
625	15.6267	10.5941	-16.0813	-49.9301	-386.803	-20.3402	114.138	55.2835	96.72	-67.704	-50.9328	-65.2779	68.9678	-9.29802	-7.63121	-16.9324	69.4466	40.1388	17.4515	-22.0538	5.4937	118.332	1.93118	-149.131
626	16.2619	9.80257	-16.1474	-50.7296	-388.31	-21.8974	113.78	56.3217	96.72	-67.704	-52.6125	-64.559	70.0204	-8.55166	-6.71076	-17.3629	69.8189	40.1178	17.595	-22.1779	5.23255	118.632	2.32934	-149.54
627	17.3032	10.4957	-15.6654	-50.0284	-389.021	-22.1328	114.317	55.6011	98.332	-67.704	-55.3093	-62.9889	70.8619	-8.96272	-6.21265	-17.6869	69.7206	39.8728	18.272	-21.8748	5.44534	118.063	2.09882	-150.496
628	16.9647	9.47211	-16.1442	-50.4314	-390.428	-23.4723	113.914	56.067	99.944	-66.092	-56.8133	-62.4811	69.2628	-8.96594	-6.3271	-17.3226	70.0898	40.8674	17.6949	-21.4638	5.37602	118.114	2.96447	-151.297
629	16.7358	8.89018	-15.5897	-51.0262	-392.794	-24.5137	113.267	55.7929	99.944	-66.092	-56.5167	-61.6187	69.8754	-9.00786	-6.2739	-18.4864	70.4122	41.2172	17.6917	-21.6733	4.76507	118.348	3.21916	-151.659
630	16.2538	8.04549	-14.1034	-49.9188	-393.507	-25.1166	113.615	55.7978	98.332	-66.092	-56.1734	-61.256	68.3714	-8.80958	-5.74033	-18.5025	69.8705	41.4816	17.2726	-21.6314	4.9166	118.1	2.29388	-151.817
631	16.0104	7.44905	-14.5419	-51.1359	-395.393	-26.2885	113.47	56.5312	98.332	-66.092	-56.0895	-61.019	69.3499	-9.3367	-6.09981	-17.9029	69.2096	42.2102	17.2033	-21.4299	5.10843	118.189	2.55986	-152.078
632	15.9185	7.5232	-13.6472	-50.0897	-398.191	-27.4459	113.635	55.7607	98.332	-66.092	-56.6795	-60.0148	68.6696	-8.96111	-6.41254	-18.2511	68.8469	42.2263	17.645	-22.4632	5.23416	117.645	1.63779	-153.48
633	16.4279	6.14817	-10.8681	-49.0419	-398.946	-29.0966	113.777	56.2056	98.332	-66.092	-56.4216	-59.9019	68.1006	-8.26311	-6.63338	-17.1694	70.0575	42.6035	17.5386	-21.5476	5.19064	118.044	1.73451	-153.238
634	16.1667	6.28196	-10.0073	-49.6706	-400.493	-30.8376	114.265	55.34	95.108	-67.704	-56.8988	-59.7182	68.3843	-7.8456	-5.5485	-18.1011	69.8738	42.0942	16.9534	-21.5057	5.36957	117.768	2.46958	-153.902
635	16.444	5.79353	-8.52264	-49.3804	-401.164	-31.455	113.027	55.5157	95.108	-67.704	-56.5586	-60.4033	67.0785	-7.68602	-6.29002	-18.3365	68.2327	42.3714	17.6595	-21.8539	5.27446	117.653	1.72645	-154.612
636	15.9443	4.70704	-7.90041	-50.5652	-402.626	-31.7435	112.98	56.0976	95.108	-66.092	-55.8719	-60.5113	67.7233	-7.91331	-5.63716	-18.5767	66.2435	42.3763	17.1968	-22.3794	4.97624	118.156	1.2493	-154.707
637	15.5445	5.08425	-8.2486	-50.4524	-403.787	-33.133	112.956	55.6495	95.108	-66.092	-55.1046	-60.6257	68.2859	-7.51514	-6.66078	-18.2511	64.7347	42.9002	17.2565	-21.7104	4.91176	117.905	2.01984	-154.58
638	15.854	5.85962	-8.48718	-51.2229	-405.212	-33.5763	113.593	56.3442	95.108	-67.704	-56.852	-60.1486	67.1575	-7.71342	-5.937	-18.1672	63.25	42.8115	17.2113	-22.0151	4.93433	117.903	1.48304	-155.581
639	14.8481	4.78119	-7.76662	-50.965	-407.475	-35.8138	113.572	55.3851	93.496	-67.704	-56.3733	-60.3775	68.2537	-7.8182	-6.80264	-18.4284	63.566	42.0635	17.055	-21.2591	4.64417	117.088	1.72645	-155.631
640	14.8626	4.01388	-7.30075	-50.9521	-409.427	-35.8235	113.756	55.4899	95.108	-67.704	-55.6559	-60.0631	68.4858	-7.50064	-6.95094	-18.0238	65.2135	42.1957	17.1936	-21.3912	4.02678	117.458	1.68776	-155.542
641	14.3516	5.3728	-7.51514	-50.8747	-411.299	-36.0814	113.649	55.6736	95.108	-66.092	-55.506	-59.6118	69.9882	-6.61726	-7.56673	-17.9061	65.0926	42.2828	17.9061	-21.8184	4.98269	117.608	1.03168	-155.924
642	14.4822	3.26108	-6.44155	-51.0665	-412.914	-36.8987	114.934	56.341	95.108	-64.48	-53.7618	-59.2797	69.8528	-6.79297	-7.72309	-18.4139	65.5504	42.1248	16.7035	-22.1424	5.27769	117.026	1.7329	-155.597
643	14.3113	3.08859	-7.39908	-51.4744	-414.473	-37.4613	115.153	56.4087	91.884	-67.704	-54.729	-59.9712	69.9608	-7.29752	-6.72849	-17.8513	65.4456	41.7363	17.6337	-21.7862	4.58453	117.339	0.809224	-155.439
644	16.0346	3.44001	-7.84077	-51.1488	-416.273	-38.1528	115.822	56.9826	95.108	-66.092	-55.5979	-59.3232	69.9463	-6.4206	-6.86228	-19.0329	64.9185	41.7814	16.9695	-22.7469	4.58292	116.91	0.901108	-155.279
645	16.8051	2.52439	-6.62693	-51.9564	-416.67	-38.9653	114.539	55.9622	90.272	-67.704	-54.3631	-57.9369	70.8442	-5.68875	-7.80692	-19.2682	65.2941	41.6976	17.0872	-22.1989	4.19604	117.339	-0.085436	-154.868
646	14.6644	1.34602	-6.21426	-51.6066	-418.04	-38.738	115.387	56.0541	91.884	-67.704	-55.6527	-57.9998	70.6507	-4.87146	-7.87623	-18.9765	65.5133	41.3962	16.3779	-22.0167	4.68608	117.707	-0.203112	-153.898
647	13.9502	1.1816	-4.95368	-51.6952	-418.93	-39.6471	115.929	56.0492	91.884	-67.704	-56.0025	-57.6935	70.23	-4.83116	-7.67957	-18.9265	64.9088	41.5541	17.1791	-21.1704	4.51844	117.645	-0.704444	-153.514
648	13.2055	1.18804	-5.20031	-51.5437	-420.921	-40.2468	115.493	56.1524	93.496	-66.092	-56.7811	-58.0191	69.6577	-5.0649	-8.95627	-19.3359	65.6068	42.1635	17.3064	-22.5196	4.77636	116.922	-1.10261	-152.594
649	13.615	0.29822	-5.12132	-51.476	-422.723	-41.2833	116.159	56.038	93.496	-67.704	-59.644	-57.6	68.2086	-4.68608	-8.06484	-19.502	65.8051	42.1393	17.1855	-22.2101	4.48781	116.817	-0.149916	-152.892
650	14.508	0.552916	-4.97786	-51.6114	-423.908	-41.854	116.899	55.7446	95.108	-66.092	-58.8348	-59.1604	68.7276	-4.54745	-7.3475	-19.1022	66.4579	42.7051	16.7422	-22.1263	3.83334	117.25	-1.11228	-151.68
651	15.3946	0.38688	-5.58558	-52.0982	-425.615	-41.8088	116.209	56.146	91.884	-67.704	-58.6284	-58.8138	68.9872	-3.92038	-7.31526	-18.3139	66.7819	42.2118	16.4085	-22.4261	4.22183	117.015	-1.06231	-151.144
652	15.2318	-0.062868	-5.16807	-53.167	-425.661	-42.8131	116.852	56.2652	93.496	-66.092	-57.5726	-59.1572	68.8953	-4.43461	-7.93749	-19.5342	66.3257	42.552	16.5343	-20.9641	4.53939	117.913	-0.067704	-149.702
653	14.5531	-0.087048	-2.76458	-52.4625	-426.272	-43.4692	116.343	56.0654	95.108	-66.092	-57.3034	-59.0282	70.3783	-3.56252	-8.66772	-19.4198	65.6616	42.2908	16.9534	-21.6717	3.97358	117.355	-0.174096	-149.95
654	14.6853	0.704444	-3.00638	-52.4658	-426.821	-44.5605	116.111	56.6828	91.884	-66.092	-56.931	-58.2222	70.6088	-4.25729	-7.50547	-20.5804	67.2865	41.5783	16.3118	-22.3214	4.7683	116.915	-1.05425	-149.494
655	13.3683	-0.162812	-3.65763	-53.6506	-428.645	-45.2827	115.377	56.4925	96.72	-66.092	-56.4313	-56.9987	69.9092	-3.92683	-8.22281	-20.9624	68.0264	41.2591	16.6487	-22.2891	4.02516	116.854	-0.496496	-148.902
656	12.4043	0.093496	-2.83228	-54.189	-429.948	-46.611	115.11	56.736	93.496	-66.092	-56.6554	-57.7886	70.6459	-3.19821	-8.60808	-20.0742	68.6776	40.7159	16.1539	-22.402	4.14123	117.296	-1.43146	-147.935
657	11.2985	0.367536	-2.5115	-52.764	-432.348	-47.0736	114.004	55.5157	93.496	-66.092	-56.7972	-57.3791	71.4874	-2.91611	-7.45389	-20.5836	68.2843	40.2275	16.4908	-22.4213	4.08481	117.097	-1.40728	-146.818
658	11.4371	-0.154752	-1.39116	-52.8301	-433.288	-47.7426	115.147	56.3426	93.496	-66.092	-56.6779	-57.3195	71.9049	-1.86347	-7.75211	-20.4934	68.7969	40.7804	16.5246	-21.5299	3.7608	117.47	-1.47014	-146.218
659	12.0142	-0.530348	-4.46524	-54.6001	-435.079	-48.7275	115.134	57.147	93.496	-67.704	-55.8477	-56.9229	71.3246	-2.42122	-6.28358	-19.4101	68.0393	39.7358	16.3505	-21.4186	4.08803	117.262	-1.84896	-144.835
660	11.5274	-0.256308	-3.33684	-54.3099	-435.864	-49.6496	115.956	56.0734	95.108	-67.704	-57.4581	-56.96	70.2977	-1.91989	-6.0853	-19.905	68.323	40.0518	16.436	-21.6072	4.32822	117.21	-2.24552	-144.151
661	11.4549	-0.37076	-3.27558	-53.9311	-436.04	-50.1429	117.081	55.8139	93.496	-66.092	-56.6731	-56.6747	69.7271	-2.1488	-5.44372	-19.2021	68.7582	40.8046	16.1603	-21.5331	4.0832	117.365	-2.2697	-142.789
662	11.9352	-0.438464	-4.36852	-54.4598	-436.773	-50.4105	117.739	55.8671	93.496	-67.704	-56.0186	-55.9009	71.3213	-2.44379	-5.92088	-18.9732	69.8609	41.5219	16.7035	-22.0473	4.61193	117.215	-3.15307	-142.668
663	13.6327	-0.1209	-3.32072	-55.3351	-437.344	-52.5173	117.321	54.9692	93.496	-67.704	-55.2078	-55.4173	70.9909	-2.32128	-6.44478	-18.6525	68.3504	41.0593	17.1871	-21.0447	4.75056	117.063	-2.9822	-141.751
664	12.622	-0.5642	-3.66085	-56.4829	-437.266	-53.2057	117.994	55.4576	91.884	-66.092	-56.1186	-56.0621	71.9274	-2.15041	-6.24972	-18.6573	68.028	42.2312	15.6154	-22.3326	4.29759	116.736	-3.0225	-139.507
665	11.6967	-0.309504	-3.74145	-56.291	-437.681	-53.2153	116.905	55.153	95.108	-67.704	-56.7601	-55.1981	70.4895	-1.3299	-6.07885	-18.7846	68.3004	43.0259	16.415	-22.2956	4.52005	116.965	-2.34546	-138.875
666	12.0094	-0.47554	-5.04395	-57.708	-438.754	-54.455	116.07	55.3029	91.884	-66.092	-58.0659	-57.0068	70.3025	-2.73234	-5.36635	-18.5316	69.0129	42.452	16.2602	-21.4751	4.944	117.197	-2.11333	-138.065
667	10.9568	-0.251472	-5.83705	-57.4839	-440.136	-55.9461	116.698	55.7978	91.884	-67.704	-55.1272	-57.5065	71.5744	-2.713	-5.91604	-18.8814	69.827	42.2247	16.3554	-21.4573	4.25729	117.247	-2.55986	-137.776
668	11.5693	-1.11228	-6.43188	-58.5043	-441.011	-56.6328	117.123	54.5485	95.108	-64.48	-53.8215	-56.4796	72.2337	-2.55018	-6.43833	-18.8959	71.144	41.4123	15.9717	-22.2408	4.62322	117.067	-2.29871	-136.528
669	12.0513	-0.665756	-8.03582	-58.5994	-442.721	-57.6967	117.958	54.6839	98.332	-64.48	-56.0541	-56.1556	73.0284	-1.15097	-6.69947	-18.5332	70.5992	40.6143	16.0733	-22.676	5.01171	116.93	-1.59427	-136.559
670	12.9153	-1.22028	-7.03154	-58.3028	-442.272	-59.2152	118.2	54.5984	96.72	-66.092	-55.3706	-58.5172	70.9232	-1.89732	-6.61081	-17.9109	70.6233	40.5257	16.7503	-21.9264	5.61137	117.118	-3.23851	-136.179
671	12.9476	-1.32023	-7.43616	-58.522	-441.801	-60.8643	119.175	54.5114	96.72	-64.48	-57.1551	-57.6822	70.7442	-1.67648	-5.94828	-19.2892	72.3449	41.5751	16.9808	-21.4477	5.39859	116.952	-1.96342	-135.582
672	11.8917	-1.62651	-6.26262	-58.0223	-441.459	-61.5413	118.216	54.8693	95.108	-66.092	-54.7355	-57.7821	71.2875	-0.865644	-6.19008	-19.4246	73.6781	40.5257	16.5681	-20.6175	5.59364	116.575	-2.06014	-135.269
673	10.4441	-2.23746	-6.55278	-58.1223	-441.86	-61.8395	117.184	54.2357	98.332	-64.48	-56.3507	-60.0196	71.7243	-2.08109	-7.49902	-18.8943	74.1891	40.595	16.5955	-21.2752	5.63716	116.638	-2.02145	-133.948
674	10.6537	-2.23423	-6.80909	-58.1996	-442.734	-63.5418	117.188	53.3508	98.332	-64.48	-56.6344	-57.276	70.6765	-1.7458	-7.08313	-18.5122	73.2493	41.3349	16.573	-21.9974	6.20298	116.896	-1.4105	-132.832
675	10.0766	-1.93279	-6.86873	-57.6838	-443.666	-64.9007	116.825	53.3491	98.332	-64.48	-56.4184	-58.1803	69.5546	-1.51367	-7.40069	-18.4735	73.1558	41.0915	16.278	-21.8619	5.46952	116.236	-2.85808	-132.585
676	11.5355	-2.01016	-6.67368	-57.7209	-444.045	-65.9389	117.263	52.8494	98.332	-64.48	-56.1975	-58.8332	69.4579	-1.67648	-7.254	-19.5632	72.6142	41.0689	16.0942	-21.6766	5.58397	117.073	-2.42606	-132.178
677	11.2953	-1.73451	-7.11859	-57.8579	-444.443	-67.4799	117.89	53.7328	98.332	-66.092	-56.5844	-59.5924	70.3235	-1.85702	-7.19274	-18.9507	72.482	41.264	16.1893	-22.1279	5.74839	116.749	-3.33684	-132.294
678	11.8708	-1.79738	-7.88913	-57.1873	-446.042	-69.2854	118.251	53.3701	99.944	-64.48	-55.6156	-58.1916	71.6486	-2.15686	-7.71503	-19.8292	73.101	41.854	16.4634	-21.5492	5.28252	117.352	-3.23206	-131.602
679	11.4178	-2.01339	-7.57479	-57.0858	-445.81	-70.799	118.16	53.7151	98.332	-64.48	-57.4049	-57.6548	71.1972	-1.11228	-7.11698	-18.7782	73.5685	42.1038	16.141	-21.8087	5.32444	116.754	-3.68826	-131.028
680	10.4458	-1.60716	-7.73599	-56.5199	-446.057	-71.7114	117.744	54.1696	98.332	-64.48	-59.7536	-59.4377	71.2262	-1.68454	-7.44099	-19.5922	72.3578	41.9152	15.9217	-21.2865	5.3873	117.296	-4.50393	-131.022
681	9.36572	-2.73395	-7.79241	-55.477	-445.931	-73.9457	117.51	54.2535	98.332	-64.48	-59.7456	-58.1062	72.3804	-2.10366	-8.09869	-20.1	71.0086	41.6509	16.3747	-21.1204	4.94884	117.099	-5.40504	-131.368
682	7.49258	-2.88226	-6.76073	-54.6597	-446.756	-74.3874	117.884	54.0084	99.944	-62.868	-59.8568	-58.9863	73.2154	-2.07948	-8.34371	-20.2387	70.5427	42.1054	16.9873	-21.035	5.26318	117.042	-5.17613	-130.709
683	7.16212	-2.73073	-6.56568	-55.2158	-448.159	-75.7301	117.452	53.6893	99.944	-64.48	-62.4037	-58.3995	73.6055	-1.3025	-9.01108	-19.9969	70.367	42.0071	15.7234	-21.9313	5.05684	116.959	-5.35184	-130.648
684	7.08152	-2.76297	-5.90153	-55.1739	-448.694	-76.2798	116.926	53.7231	99.944	-64.48	-61.3527	-59.615	72.2724	-1.39277	-7.72309	-19.2537	69.1758	42.2199	15.4462	-21.4235	5.39214	116.91	-5.40342	-130.844
685	5.3325	-4.09126	-4.69414	-55.5882	-448.624	-77.7032	116.178	54.6855	98.332	-64.48	-62.4795	-59.7069	72.7721	-1.03168	-7.87784	-18.6541	68.6744	41.6444	15.6977	-21.7298	5.40987	117.366	-5.26963	-130.158
686	5.01171	-3.58992	-4.98108	-54.9305	-448.766	-79.2604	116.799	53.3878	99.944	-64.48	-62.278	-59.6714	72.5787	-2.23584	-8.08096	-19.1538	69.0275	42.2908	15.7799	-20.2645	4.96818	117.457	-5.46629	-130.353
687	4.65868	-3.6141	-5.92732	-54.8112	-449.99	-79.391	116.43	53.7441	99.944	-64.48	-61.8621	-60.6854	72.6883	-1.50238	-7.82948	-18.6718	67.9797	41.4993	16.6165	-20.3128	5.17452	117.271	-6.48991	-130.861
688	4.80537	-3.56252	-5.59364	-55.0369	-450.204	-80.3808	116.793	53.5087	98.332	-64.48	-64.3204	-60.1083	72.4223	-0.59644	-7.8714	-19.1409	68.0844	41.9281	16.3263	-21.6056	5.37602	116.689	-6.37224	-129.535
689	4.25084	-4.70704	-6.0579	-54.6694	-450.486	-81.2384	116.973	53.3153	99.944	-62.868	-64.8894	-59.9342	72.5045	-1.10744	-7.28785	-18.7202	67.8442	41.9007	16.0023	-20.9689	5.86607	116.448	-6.86873	-129.355
690	3.9623	-4.67319	-6.55439	-55.7188	-451.104	-82.2072	116.939	54.1874	98.332	-64.48	-65.9405	-61.2302	72.8753	-1.54752	-7.25884	-19.049	69.1016	42.3956	17.055	-20.5208	5.16807	116.688	-6.27068	-129.524
691	4.57163	-4.89887	-7.33138	-56.3974	-451.757	-82.1975	115.98	53.4668	99.944	-64.48	-66.7481	-62.0185	71.971	-1.15258	-6.34	-19.3101	69.2821	41.5171	16.5004	-20.8915	6.13688	116.535	-7.146	-129.308
692	4.4733	-5.0778	-7.90686	-57.5661	-452.118	-83.3388	116.741	54.1455	98.332	-64.48	-66.329	-61.9572	72.8221	-1.10744	-6.57857	-19.9034	69.2821	41.5606	16.2409	-20.5353	5.70164	116.462	-7.53932	-129.602
693	4.42333	-5.10359	-8.83054	-57.2582	-452.635	-84.2173	116.245	53.1734	96.72	-64.48	-66.7416	-62.2861	73.907	-0.570648	-6.22716	-19.5262	69.661	40.8046	15.7702	-20.8399	6.02082	116.847	-6.84294	-129.992
694	3.75435	-4.55551	-8.66772	-58.19	-452.991	-85.1668	115.219	52.2675	96.72	-62.868	-67.575	-63.8223	73.4363	-0.839852	-6.94933	-18.8685	71.3874	41.2994	15.9943	-21.0011	5.97407	116.046	-6.91226	-129.144
695	3.03378	-4.64578	-10.1169	-57.4581	-453.717	-85.8874	114.441	52.0273	98.332	-62.868	-68.3536	-63.8271	73.3412	-1.22351	-6.73655	-19.0941	72.9317	41.5396	15.9507	-20.8222	5.48241	116.262	-6.65111	-129.553
696	1.69905	-5.52271	-7.76823	-54.1471	-453.575	-84.9089	114.367	51.8919	99.944	-62.868	-69.2934	-64.5799	72.5045	-1.9473	-6.63338	-18.696	72.669	41.351	16.394	-20.4257	6.02404	116.615	-6.96223	-130.379
697	1.10906	-5.47274	-7.28302	-54.0455	-453.34	-85.6133	114.151	51.5776	98.332	-62.868	-70.1591	-65.0732	71.684	-1.47176	-6.80425	-18.5025	72.6496	41.8894	16.3554	-20.416	5.61298	117.007	-7.10247	-130.433
698	0.304668	-4.99398	-9.59946	-54.2551	-455.027	-86.105	114.189	51.7178	96.72	-61.256	-69.9511	-64.7831	71.5212	-1.30733	-6.80909	-18.5702	73.0671	41.4687	16.502	-20.7013	6.06757	115.882	-7.49096	-129.968
699	0.955916	-5.86284	-8.55811	-54.3695	-455.319	-86.2565	114.188	50.7716	98.332	-61.256	-69.2225	-64.6493	72.2998	-1.38632	-8.2341	-19.0909	74.0843	40.7272	15.954	-21.1817	6.153	116.53	-6.44478	-129.342
700	1.69744	-5.45984	-9.91864	-53.5474	-455.901	-86.8658	113.519	51.6727	98.332	-61.256	-67.0028	-65.2102	73.5959	-2.33256	-7.43616	-19.0925	73.5717	40.8948	16.3151	-21.6588	6.0982	116.062	-6.14011	-129.579
701	2.22617	-5.40826	-9.49468	-53.7602	-455.922	-87.5848	114.188	51.5276	99.944	-59.644	-67.9619	-65.0781	72.1338	-1.88604	-6.7704	-19.3859	74.1601	41.056	15.9266	-20.5788	6.13688	116.356	-6.56568	-129.938
702	2.14718	-5.72905	-11.0406	-53.5877	-456.346	-87.6847	115.509	51.8951	99.944	-59.644	-69.316	-65.3086	71.9113	-1.53301	-6.53505	-19.5568	73.3379	40.0243	15.6025	-21.251	6.1659	116.364	-7.38457	-130.129
703	0.86242	-6.14333	-11.0712	-54.3212	-457.265	-88.7938	114.192	52.0192	99.944	-59.644	-68.0909	-65.2892	71.8936	-1.61845	-6.69141	-18.9039	74.9564	39.6633	16.3183	-21.4251	5.94667	115.856	-5.0246	-129.224
704	-0.899496	-6.45284	-10.2652	-53.6361	-455.877	-88.905	114.581	51.4228	98.332	-59.644	-67.4493	-65.8631	73.0075	-2.11333	-6.34322	-18.5606	74.7565	39.4489	16.228	-21.4686	6.17235	116.427	-6.85906	-129.386
705	-1.96342	-6.81715	-9.28028	-53.0525	-454.908	-89.6514	114.447	51.4276	99.944	-61.256	-66.5127	-65.5455	73.9086	-0.996216	-7.08635	-18.7879	74.6453	39.4489	16.1571	-22.186	6.01276	115.75	-5.83222	-130.245
706	-2.7275	-6.73655	-7.60058	-52.8913	-455.659	-88.8164	115.165	51.8322	98.332	-61.256	-66.2226	-66.3209	74.0247	-0.743132	-7.69891	-19.5278	73.6136	39.4215	15.5268	-22.0731	5.86607	116.567	-5.4937	-130.211
707	-2.92417	-6.78491	-5.6146	-50.1864	-456.146	-89.1468	114.634	51.152	98.332	-61.256	-66.4418	-66.848	73.799	-1.69744	-7.79563	-18.3301	73.5717	39.2087	16.3312	-21.8362	5.83866	116.032	-5.94183	-130.262
708	-4.65707	-8.07612	-4.99236	-51.6662	-456.739	-90.3284	114.821	51.9	98.332	-59.644	-66.4837	-66.4563	73.8312	-1.0349	-6.54311	-18.9797	74.3567	38.0061	15.0529	-22.7356	5.54528	115.901	-5.1052	-130.986
709	-4.22344	-7.952	-5.92894	-51.2842	-456.707	-89.8513	115.65	51.6791	99.944	-59.644	-66.2274	-66.7304	75.1579	-1.56042	-6.88163	-19.1489	75.3739	37.9046	15.3672	-22.2827	5.58719	116.232	-5.9773	-130.174
710	-5.17452	-9.24804	-4.44106	-51.6098	-455.635	-91.3069	115.482	53.0735	98.332	-59.644	-66.7642	-67.1608	74.3841	-1.48465	-8.40336	-18.9732	75.685	38.0996	15.9685	-21.8249	5.27124	116.38	-5.24384	-131.197
711	-5.86446	-8.91597	-5.33894	-51.2052	-455.385	-89.9625	115.771	53.0429	99.944	-61.256	-67.1737	-67.517	73.3541	-2.55663	-8.17445	-18.6573	75.4674	38.1286	15.3769	-22.3149	5.80642	115.882	-5.0649	-130.435
712	-6.79942	-9.27706	-5.04717	-51.9032	-454.906	-91.2505	115.2	52.7914	99.944	-59.644	-67.5509	-66.7932	72.4981	-1.91183	-8.56939	-19.0377	76.7554	37.4065	16.0878	-21.4525	5.96279	116.183	-3.67536	-130.034
713	-6.85906	-9.79129	-5.52594	-52.8301	-454.566	-90.5186	116.177	52.3255	99.944	-59.644	-67.783	-66.6175	73.1316	-2.04563	-7.99391	-18.9523	77.5856	37.9819	16.0055	-22.3149	5.8838	115.543	-3.40777	-129.963
714	-7.146	-9.9009	-4.89887	-52.9397	-453.141	-90.9345	114.936	52.0063	96.72	-58.032	-66.6481	-66.2451	73.9876	-1.70388	-7.32493	-18.3155	77.3212	37.7643	15.9459	-21.7523	5.51304	116.607	-3.59154	-130.414
715	-8.10514	-9.91864	-6.01921	-51.9515	-452.414	-89.9464	116.046	52.39	95.108	-62.868	-66.2806	-66.8238	74.3309	-2.68076	-7.02187	-18.8169	79.0912	37.0309	16.4392	-21.6282	5.86607	115.845	-3.98486	-130.264
716	-9.1352	-10.0105	-7.85044	-52.3981	-452.587	-89.4741	115.477	52.8043	96.72	-59.644	-65.8115	-66.9351	74.4019	-2.07948	-8.43237	-19.1215	77.887	37.4806	16.3537	-22.078	5.41471	115.979	-2.6872	-130.046
717	-10.1234	-10.1282	-8.14221	-52.1047	-452.779	-90.3059	115.526	53.1202	98.332	-61.256	-66.6981	-66.5949	74.4389	-2.73073	-8.96272	-19.0716	76.7634	36.5392	16.602	-20.5723	5.27769	116.017	-3.60282	-129.974
718	-11.6709	-10.2636	-6.36579	-52.3239	-452.087	-90.33	116.519	52.3723	96.72	-61.256	-66.6062	-66.1001	73.0655	-1.92312	-8.69029	-19.1538	76.4169	36.652	16.1361	-21.9264	4.90854	115.656	-3.30621	-129.779
719	-12.5865	-10.2056	-6.66078	-51.2809	-451.107	-90.6089	116.544	53.1202	96.72	-61.256	-66.3741	-67.4106	73.6684	-3.13534	-8.21798	-19.4327	75.7624	37.7643	16.0749	-22.5035	5.08102	115.395	-3.0628	-131.191
720	-13.9357	-11.1631	-5.17774	-51.0424	-450.594	-90.0076	116.68	53.2137	96.72	-59.644	-65.6906	-66.8029	73.9118	-3.15791	-6.87518	-18.3204	75.9929	37.35	16.9341	-22.1698	5.32766	115.485	-3.57219	-130.082
721	-13.1571	-10.9213	-5.32444	-51.4196	-451.877	-90.1027	117.331	53.3959	98.332	-61.256	-64.9459	-67.0479	74.5695	-2.89676	-6.61726	-17.5547	77.0472	37.6338	17.0388	-20.9979	4.73767	116.014	-2.33579	-129.542
722	-13.9341	-11.5322	-5.86768	-50.7167	-451.034	-90.7669	117.689	53.354	101.556	-61.256	-66.1919	-66.6723	73.8489	-2.53568	-6.80103	-17.7642	77.2954	36.7923	16.1925	-21.5476	5.16807	115.862	-2.40994	-130.724
723	-14.2678	-11.0406	-6.91226	-48.8017	-451.7	-89.3564	118.389	53.1702	101.556	-59.644	-65.9437	-66.7787	73.0881	-3.22884	-7.23949	-18.156	77.2454	37.0776	16.3811	-21.0914	5.4131	115.324	-2.32289	-130.53
724	-14.1663	-10.802	-5.17936	-50.2654	-450.98	-89.8142	119.127	53.8166	101.556	-58.032	-65.7809	-65.9244	73.5233	-2.36158	-7.16212	-19.2199	77.2615	36.5569	17.0566	-21.0221	4.9569	115.411	-2.8484	-130.52
725	-14.6257	-10.5973	-5.11971	-51.397	-451.046	-90.2752	118.654	53.9827	99.944	-59.644	-64.0464	-66.5869	73.8602	-3.58186	-5.08586	-18.7459	78.477	36.4634	16.5843	-21.6911	5.08908	116.064	-1.03974	-129.951
726	-14.9223	-11.305	-5.35345	-49.3836	-450.915	-90.0737	118.366	54.2228	101.556	-59.644	-63.0888	-66.6691	74.5695	-2.86452	-6.46734	-18.0383	79.8536	36.565	16.7164	-21.4783	4.89887	115.348	-2.526	-130.886
727	-16.6262	-11.0728	-4.65707	-50.2477	-450.728	-89.9931	118.034	54.8161	101.556	-59.644	-62.8777	-65.6664	74.3535	-2.79037	-6.52538	-17.2194	79.9633	36.2055	16.4988	-22.215	5.16646	115.551	-2.87903	-130.232
728	-18.1511	-11.9014	-5.06007	-49.6641	-449.746	-89.2145	117.173	55.082	99.944	-59.644	-63.1485	-65.9792	73.6942	-2.97575	-6.22877	-17.4257	79.6409	36.2797	16.3521	-21.8313	5.22288	115.65	-2.45508	-130.043
729	-18.2011	-11.4371	-3.26269	-49.5561	-448.6	-89.7739	116.954	55.6607	99.944	-59.644	-63.4048	-66.9238	74.073	-3.87847	-6.46251	-16.9308	78.9235	36.3006	16.6375	-20.5369	5.38569	116.033	-2.123	-130.585
730	-18.6283	-11.8901	-3.96068	-48.5196	-449.505	-88.4988	116.833	55.5656	98.332	-61.256	-62.3796	-66.3161	73.4814	-3.735	-6.34483	-17.9448	78.1643	36.6907	16.2232	-21.1494	5.12616	115.632	-2.96769	-130.317
731	-18.9458	-11.7531	-5.17452	-48.8436	-450.67	-88.1264	116.996	55.4625	98.332	-59.644	-61.8879	-66.6369	74.0263	-3.92683	-6.54794	-18.2301	77.5291	36.7649	16.2828	-20.6932	4.66352	116.28	-2.25035	-129.882
732	-19.963	-12.2786	-4.86502	-48.8742	-451.46	-88.207	116.077	56.0331	98.332	-61.256	-61.5655	-66.0533	73.5846	-3.28848	-4.97141	-18.4671	77.3905	37.7337	16.7068	-21.841	4.21538	116.406	-2.78392	-130.275
733	-19.9388	-12.3576	-6.03855	-48.6066	-452.372	-86.5305	116.088	56.6199	99.944	-59.644	-62.9164	-66.8867	72.8414	-4.74573	-5.19548	-17.7949	77.2084	38.0996	16.581	-20.1355	4.45557	116.581	-3.51577	-129.906
734	-19.3924	-11.7821	-4.42655	-47.3638	-451.776	-87.0448	116.483	56.6102	99.944	-59.644	-63.1646	-67.2478	74.0924	-4.21216	-5.86929	-17.5692	77.0875	37.666	16.494	-21.4332	4.18314	116.104	-3.12889	-130.092
735	-19.5536	-11.6467	-5.22127	-49.0902	-452.956	-86.4387	116.109	57.7402	96.72	-61.256	-63.0598	-67.5057	73.2412	-3.81077	-5.86607	-17.6611	77.8	37.134	16.3231	-22.2085	4.22344	116.548	-2.86775	-130.295
736	-19.6874	-11.7692	-5.86284	-46.9705	-453.381	-87.7702	116.836	57.5806	98.332	-61.256	-62.7116	-66.8819	74.0956	-3.55124	-5.4131	-16.9582	77.8354	37.2614	16.4988	-21.2623	4.11382	116.838	-4.09287	-130.304
737	-18.7879	-12.4011	-4.93594	-48.2052	-455.361	-87.1995	116.124	58.3189	96.72	-61.256	-62.149	-67.3365	73.5862	-4.02516	-5.46629	-16.7068	78.0659	36.5134	17.1243	-22.1489	3.79465	116.548	-3.56736	-129.964
738	-19.1796	-12.0771	-5.83383	-47.8506	-455.076	-86.5225	114.973	59.0218	98.332	-61.256	-61.9878	-67.6621	74.5808	-4.27664	-5.47274	-16.2522	77.4582	36.3683	16.8422	-21.8942	4.00421	116.449	-4.2718	-130.064
739	-20.69	-12.3624	-5.25512	-48.439	-455.095	-86.8884	114.081	58.7268	98.332	-61.256	-62.2748	-67.7959	74.318	-5.28736	-4.79409	-17.416	77.031	35.4656	16.8599	-22.4938	3.69954	116.789	-3.16919	-129.516
740	-21.5379	-11.8466	-5.28897	-48.2294	-455.974	-85.6085	113.12	58.6542	95.108	-59.644	-61.5059	-68.0586	75.5222	-4.32338	-4.34112	-17.545	77.3099	35.0513	15.775	-21.9393	3.67858	116.894	-2.91127	-129.45
741	-22.5712	-12.2609	-6.49152	-48.9855	-456.001	-85.5908	113.045	59.3909	95.108	-61.256	-62.5198	-68.9597	74.5276	-5.69681	-4.57324	-17.5627	77.0955	35.4527	16.9131	-21.9845	2.93062	116.864	-3.43678	-130.467
742	-23.129	-11.5032	-6.48508	-48.6018	-457.008	-85.2506	111.915	58.9702	95.108	-62.868	-60.8417	-68.0989	74.9145	-4.20732	-5.12294	-16.3296	78.0933	35.9186	17.3596	-21.8845	2.93384	117.278	-3.44807	-129.616
743	-22.9162	-11.1083	-3.94618	-48.2423	-457.814	-85.4876	112.295	59.5682	96.72	-61.256	-60.6434	-68.1376	74.4148	-4.29598	-6.36579	-16.976	77.9934	35.5124	16.9179	-21.6943	3.0757	117.246	-3.72372	-130.925
744	-21.9345	-11.9804	-5.08747	-47.5282	-456.647	-84.7541	112.539	60.1195	99.944	-61.256	-62.062	-68.2408	74.2407	-4.29437	-6.08046	-16.5536	77.3421	34.9949	17.1549	-21.4477	3.06925	117.716	-3.7882	-129.859
745	-22.8823	-11.8208	-3.5335	-49.5206	-456.489	-84.7332	111.499	60.176	98.332	-61.256	-62.6375	-68.3794	72.5513	-4.4862	-6.41576	-16.9324	77.9063	34.1454	17.3483	-21.8265	2.04079	117.368	-3.19498	-129.523
746	-23.7496	-11.6918	-3.0499	-48.6679	-456.649	-85.3087	111.351	59.5021	96.72	-61.256	-63.9996	-68.9114	71.8694	-5.31154	-5.63394	-16.7841	78.8107	33.9229	16.9889	-21.4203	2.83712	117.734	-3.47064	-129.439
747	-24.475	-12.6349	-5.16968	-48.7017	-457.026	-85.2103	111.064	59.7375	96.72	-61.256	-62.6842	-69.3466	72.6577	-5.97246	-4.78442	-17.4805	79.37	33.3587	16.9808	-22.0183	2.3245	117.937	-3.59315	-129.658
748	-23.5449	-11.9788	-6.74783	-47.9538	-458.192	-85.2555	110.58	59.2781	98.332	-61.256	-61.6848	-68.7808	73.7055	-5.63233	-4.24601	-17.0179	80.3518	33.5328	16.9711	-21.4251	3.1708	117.853	-4.47491	-128.609
749	-23.7399	-11.6257	-5.91765	-47.8716	-459.106	-85.4054	109.642	59.5134	96.72	-59.644	-61.9347	-68.5406	73.7232	-5.34217	-4.79086	-16.8148	80.8902	33.2314	17.4531	-21.5073	2.123	118.253	-4.32016	-129.66
750	-23.1999	-10.9826	-4.3524	-48.0698	-459.588	-84.9411	109.286	59.4586	98.332	-59.644	-62.1507	-68.51	73.2509	-5.34217	-5.28091	-17.063	81.5156	33.4168	17.0082	-21.1543	2.23746	118.045	-3.23045	-129.348
751	-23.1725	-11.5339	-3.77047	-47.9522	-458.612	-85.7616	108.717	59.8471	98.332	-59.644	-60.6966	-68.3988	75.4255	-5.52594	-4.3927	-16.5053	82.5376	33.1508	16.6213	-21.5879	2.16653	117.691	-3.60604	-129.008
752	-23.2273	-11.6467	-2.42284	-48.4342	-457.571	-86.0566	109.087	59.2861	96.72	-61.256	-59.5634	-68.6212	74.31	-4.98914	-4.27664	-17.5047	82.9084	33.1056	17.7675	-21.5653	1.64102	118.764	-4.83278	-129.942
753	-26.303	-11.7209	-2.39704	-47.4202	-457.108	-85.7987	108.734	60.0889	98.332	-61.256	-59.5328	-67.733	75.1095	-5.16001	-4.1106	-16.4698	84.011	32.2577	17.3032	-22.1634	1.53785	118.345	-4.37497	-128.671
754	-26.2563	-10.3249	-4.35401	-48.0731	-458.185	-85.9099	108.244	60.0051	98.332	-61.256	-60.2824	-67.2317	75.1692	-4.19442	-4.40076	-16.6197	83.7321	32.3416	17.1984	-21.1575	0.841464	118.53	-3.57542	-127.973
755	-27.0623	-10.9116	-4.91499	-46.3305	-458.627	-85.4699	108.284	60.7063	96.72	-61.256	-60.932	-67.43	73.9424	-4.34756	-3.69793	-16.1007	84.3286	32.0852	16.7825	-21.5798	1.16709	118.841	-3.8817	-128.56
756	-26.7624	-11.1292	-6.58986	-47.5766	-459.946	-85.3667	107.828	60.3823	96.72	-61.256	-61.0255	-67.388	73.9021	-4.02194	-3.519	-16.5665	84.335	31.924	17.0066	-21.8748	1.29444	119.294	-3.46258	-128.433
757	-24.7942	-10.7504	-5.18419	-48.3342	-462.07	-83.6289	107.919	60.0357	96.72	-59.644	-60.9546	-68.0103	74.1359	-5.41148	-4.0703	-16.257	84.2334	31.3195	17.1936	-21.6459	0.501332	119.886	-3.81883	-127.606
758	-24.6684	-10.6102	-3.44001	-47.9844	-461.751	-85.1233	107.251	61.0481	98.332	-61.256	-60.4645	-67.4815	74.6533	-5.14067	-4.18959	-17.1775	84.169	30.3427	17.1468	-21.7701	0.288548	119.124	-3.76886	-129.221
759	-24.3009	-10.2733	-3.16597	-48.0908	-460.033	-85.1088	107.674	60.0051	98.332	-61.256	-61.5123	-67.5541	73.9183	-4.61677	-3.66569	-16.4779	84.2721	29.9816	17.4209	-22.431	0.191828	119.33	-3.02089	-129.94
760	-25.4277	-9.98473	-3.32394	-49.0596	-459.372	-84.875	108.062	60.0857	99.944	-61.256	-62.6149	-68.2972	72.1418	-5.05846	-3.48353	-18.0222	85.1958	29.2417	17.4676	-21.4557	0.001612	119.401	-3.32233	-128.431
761	-27.828	-9.80096	-1.77481	-47.1687	-458.688	-85.2603	107.912	59.8197	96.72	-62.868	-61.0303	-67.8201	73.4379	-5.11004	-3.83334	-17.2532	85.4618	30.3249	16.9373	-21.2526	0.029016	120.376	-3.22561	-128.006
762	-28.4034	-9.53176	-3.21594	-48.5615	-459.913	-84.5736	107.975	59.1668	96.72	-61.256	-61.2544	-68.136	74.181	-4.78764	-4.36852	-18.1527	85.6246	30.333	16.7761	-20.8077	-0.452972	120.579	-2.95318	-128.407
763	-30.0058	-9.377	-4.25568	-46.9559	-460.448	-86.0727	107.62	59.1443	98.332	-59.644	-59.6488	-68.2456	75.3868	-4.89726	-3.48676	-17.2258	86.271	30.8585	17.6111	-22.2972	-0.399776	120.057	-3.20949	-128.692
764	-30.6119	-9.16906	-4.63289	-48.9242	-461.145	-85.6262	107.917	59.0395	98.332	-61.256	-60.5677	-68.5084	74.1826	-5.60815	-3.97842	-16.257	84.8331	31.8451	17.0646	-22.3907	-0.199888	120.292	-2.71944	-128.825
765	-28.9547	-10.349	-5.21321	-46.295	-461.885	-86.5983	107.543	58.9379	96.72	-61.256	-60.6628	-69.0726	73.4524	-6.20136	-4.0026	-15.1834	83.3984	31.708	17.0453	-22.0393	-0.486824	120.212	-1.37342	-127.732
766	-29.5463	-10.1701	-5.19064	-48.1714	-462.349	-85.3538	106.608	59.2281	96.72	-61.256	-61.5752	-68.5164	72.9204	-5.34056	-4.18798	-15.2785	83.7563	31.8096	17.0533	-21.0866	-0.639964	121.266	-1.78448	-128.484
767	-28.534	-10.6618	-5.98536	-48.3165	-461.714	-87.0899	107.706	59.7036	96.72	-59.644	-60.4645	-68.3407	73.8522	-5.82738	-3.14018	-15.3156	83.5209	33.0138	17.2806	-21.3993	-0.70928	121.064	-1.85058	-129.018
768	-26.3739	-10.2878	-5.96279	-47.957	-463.248	-85.7262	106.613	60.0873	96.72	-61.256	-60.8756	-68.784	75.2562	-5.74517	-3.60604	-15.3656	83.3952	33.6215	16.5617	-21.8861	-1.30411	121.653	-1.78448	-129.611
769	-26.2047	-9.17873	-5.76935	-48.2214	-462.933	-86.6353	106.068	59.7746	98.332	-61.256	-61.6284	-68.6245	74.1423	-5.31638	-3.61249	-16.3473	82.7149	34.0567	17.3209	-21.6201	-0.87048	121.503	-1.27509	-128.979
770	-25.1891	-9.32542	-6.84455	-50.865	-463.466	-86.5289	105.484	60.4323	99.944	-61.256	-63.3177	-69.7142	72.303	-6.37707	-3.51255	-15.7766	81.6059	34.679	17.4966	-21.2268	-1.24124	121.73	-0.79794	-128.799
771	-24.1284	-9.44471	-4.94562	-49.7205	-463.084	-86.6192	106.695	60.7708	98.332	-61.256	-62.7149	-68.963	73.9827	-5.34539	-3.22884	-15.6122	81.3367	35.1964	17.4725	-21.2994	-1.14613	121.487	-1.49594	-128.812
772	-25.2488	-10.3378	-3.86074	-46.5771	-461.525	-86.803	105.726	60.5902	98.332	-61.256	-62.0959	-69.719	73.4008	-6.17396	-3.13373	-15.0351	80.9305	35.3931	17.487	-22.2456	-1.32023	121.983	-0.565812	-128.937
773	-26.0145	-8.41464	-4.22022	-47.5766	-463.145	-85.7245	105.652	60.8901	99.944	-61.256	-61.8734	-69.806	74.2374	-5.98858	-1.64908	-15.6138	81.8058	34.7031	17.084	-21.2091	-1.66197	122.093	-0.704444	-128.331
774	-27.1042	-8.5436	-3.33362	-47.4073	-460.46	-86.2049	106.347	60.5064	99.944	-61.256	-62.0281	-68.8856	74.7662	-6.05306	-1.78771	-15.3736	81.9315	34.4565	17.1694	-20.4498	-1.68776	122.072	-1.44435	-128.362
775	-27.4782	-9.12714	-3.19015	-46.8238	-460.985	-87.0625	106.224	60.7676	99.944	-61.256	-62.2022	-69.8689	74.4663	-6.045	-3.14985	-15.177	82.6021	34.6902	17.4451	-21.6089	-1.9747	121.93	-1.10744	-128.088
776	-29.2917	-8.19702	-2.48087	-47.4798	-462.054	-85.5392	106.576	60.1163	99.944	-61.256	-62.7664	-69.8721	73.3976	-5.64039	-2.70816	-14.3113	82.1733	34.6113	16.8438	-21.1236	-2.22134	122.001	0.143468	-127.421
777	-29.9977	-8.02292	-2.48087	-46.906	-460.332	-86.1227	106.764	60.5677	98.332	-61.256	-61.8847	-69.6771	74.8081	-5.72421	-3.59315	-15.0303	81.7961	34.824	17.2307	-20.7932	-2.58081	122.62	-0.931736	-127.919
778	-29.361	-8.22926	-4.16218	-47.4186	-461.235	-85.6294	107.282	60.8901	98.332	-61.256	-61.3559	-70.0559	76.3089	-5.61621	-3.37392	-15.3333	81.3576	34.8611	17.0775	-20.7513	-2.47926	122.862	0.456196	-128.402
779	-29.1788	-8.48557	-4.02839	-46.8028	-459.931	-86.3968	107.719	60.7724	98.332	-61.256	-61.9169	-70.3187	75.5238	-5.96924	-3.44162	-14.6579	82.0105	35.0336	17.1694	-20.8109	-2.54696	122.47	0.083824	-127.551
780	-29.1708	-7.63927	-3.37714	-47.0172	-459.473	-87.6847	109.608	59.6585	98.332	-61.256	-63.5708	-70.9167	73.4073	-5.72582	-3.2772	-15.1222	81.83	34.9981	17.0791	-21.1994	-2.80327	122.343	0.30628	-128.899
781	-29.1901	-6.88646	-3.519	-46.4143	-458.733	-87.538	107.069	59.8922	98.332	-62.868	-63.9094	-70.3477	74.239	-5.6952	-2.91127	-14.9948	82.673	34.8208	17.3757	-21.3783	-2.98865	123.023	0.631904	-128.178
782	-29.5399	-7.19758	-2.72267	-46.8592	-457.408	-87.7105	108.015	60.0309	96.72	-62.868	-63.7707	-71.2601	74.2906	-6.30453	-3.00799	-16.8228	82.3087	34.2872	16.9179	-21.5444	-3.06602	122.905	1.17676	-129.199
783	-28.3438	-7.51192	-2.45024	-45.9162	-456.52	-86.9884	108.283	60.666	99.944	-62.868	-63.6015	-71.1263	74.6066	-6.44478	-2.39382	-16.1377	80.8321	35.4592	16.9212	-21.6798	-2.37125	121.846	0.41106	-128.509
784	-29.6898	-7.5635	-3.89298	-45.676	-456.651	-87.3462	107.106	60.7611	99.944	-61.256	-64.9491	-71.0102	74.6888	-6.35128	-2.39704	-15.4075	80.7386	35.3399	17.3935	-21.6943	-3.49159	122.509	1.30572	-128.912
785	-30.5974	-7.59736	-3.23851	-46.6932	-455.321	-86.8675	109.493	59.6956	98.332	-61.256	-65.3489	-71.273	73.5685	-6.88646	-2.38737	-16.1587	80.3614	35.8477	17.2951	-22.0538	-3.34329	122.088	0.691548	-128.186
786	-30.1637	-6.73332	-3.20143	-47.5588	-455.827	-86.5418	107.291	60.1985	98.332	-61.256	-66.8158	-71.2037	72.6802	-6.69947	-1.76514	-16.0281	80.463	36.349	17.4209	-20.8303	-3.4658	123.033	2.27292	-128.349
787	-30.8859	-7.62798	-2.46475	-46.798	-456.091	-86.2323	108.763	59.7343	99.944	-61.256	-66.9786	-71.1408	72.6545	-6.11593	-1.58137	-16.4569	80.2744	37.1066	17.487	-20.0468	-3.19015	122.538	1.53462	-128.13
788	-31.2696	-6.52699	-2.38737	-44.9232	-454.927	-87.1963	108.92	60.0986	99.944	-61.256	-64.97	-72.1902	74.3696	-6.67529	-1.56203	-16.1603	80.0568	36.8552	17.0727	-20.7368	-3.28526	122.909	1.50561	-127.754
789	-31.5356	-5.62427	-3.23851	-47.0253	-455.342	-86.0195	108.97	59.2346	99.944	-59.644	-65.6842	-71.5841	73.8296	-5.92732	-2.4986	-16.5843	79.8472	36.5182	16.8954	-19.5681	-3.19176	123.166	0.99138	-128.794
790	-30.7505	-6.33355	-3.58831	-45.4149	-453.926	-87.638	109.144	59.5973	99.944	-59.644	-66.0581	-71.7759	73.3653	-6.29647	-2.69688	-15.8443	79.8875	36.2233	16.9357	-20.3322	-3.28364	123.002	1.47659	-129.479
791	-30.5281	-5.99342	-4.4459	-46.7819	-455.506	-85.9099	109.315	59.4409	99.944	-61.256	-65.9792	-71.95	74.2826	-6.75428	-0.364312	-16.7374	81.9251	34.5097	17.0517	-20.6207	-3.38681	122.894	1.8135	-129.029
792	-29.7607	-6.04822	-3.88331	-46.0903	-455.58	-87.3801	110.877	60.0003	98.332	-61.256	-65.1119	-72.1628	74.3745	-7.12826	-0.494884	-16.9244	83.6644	32.78	17.0679	-20.0146	-4.15896	123.036	1.94246	-129.249
793	-29.4754	-6.73494	-4.89403	-46.5143	-454.033	-87.1415	110.999	58.7703	99.944	-61.256	-65.0909	-71.813	73.7297	-6.71882	-1.87476	-17.2903	85.3925	32.1626	17.0808	-20.0839	-4.18153	123.005	1.92634	-129.982
794	-30.0767	-6.13527	-3.20143	-46.0033	-454.046	-86.6482	109.611	59.644	101.556	-61.256	-65.9711	-71.2149	73.2299	-6.23522	-2.3503	-16.9131	84.9121	31.8547	17.674	-19.4617	-4.7022	122.654	1.94891	-130.05
795	-30.1815	-6.84294	-4.03161	-47.5459	-453.992	-86.4983	111.608	58.543	103.168	-61.256	-66.5675	-71.7727	72.9333	-6.72043	-2.56308	-16.2683	85.1765	32.2577	17.3516	-20.2596	-4.1106	122.272	2.6066	-129.31
796	-31.3067	-5.71293	-2.52117	-47.8603	-453.07	-88.6826	110.951	58.759	101.556	-61.256	-66.2613	-71.9113	73.2783	-6.29486	-2.5115	-16.6391	84.5526	31.5759	17.4531	-19.3166	-4.90048	123.473	1.84896	-130.001
797	-32.3948	-5.99825	-4.70704	-48.5551	-452.284	-86.9368	111.014	58.3318	98.332	-61.256	-65.7003	-72.2015	72.5545	-7.42326	-1.94085	-16.6149	84.904	31.7032	16.336	-19.66	-5.19709	123.237	2.5389	-130.264
798	-32.9219	-5.84028	-4.25407	-46.4562	-451.889	-88.4633	112.061	58.5108	99.944	-61.256	-65.5745	-71.5696	74.2552	-7.02348	-2.16492	-16.7003	85.2152	31.7612	17.7417	-19.589	-4.541	122.322	3.36102	-130.148
799	-33.478	-5.51465	-4.2847	-46.295	-451.142	-88.8341	110.329	58.3544	103.168	-61.256	-66.5208	-72.1821	73.0413	-7.76017	-2.40994	-16.7181	86.0695	31.1019	17.6804	-19.1409	-5.73388	123.231	3.2917	-130.329
800	-34.197	-4.71026	-3.1434	-45.8098	-452.064	-89.6498	111.531	59.1878	99.944	-62.868	-66.0581	-71.7034	73.2009	-7.28302	-2.2971	-16.6713	86.9819	29.7092	16.9373	-19.9034	-5.74839	123.426	3.1434	-130.633
801	-34.2195	-5.56946	-4.46363	-47.4653	-451.652	-88.5278	110.578	58.2786	101.556	-64.48	-65.8873	-72.5416	73.8538	-7.64572	-3.24979	-17.5031	87.48	29.0805	17.5353	-19.3198	-6.38997	122.991	3.86074	-130.117
802	-33.5828	-5.84834	-4.38303	-45.6905	-450.185	-90.7024	112.311	58.5865	103.168	-62.868	-65.6745	-72.7093	73.4621	-7.48613	-2.73395	-16.1748	87.1818	28.8677	17.7433	-19.618	-6.88969	123.687	3.49965	-130.596
803	-33.9971	-4.3653	-4.30243	-46.4852	-449.775	-90.4735	112.387	58.4237	99.944	-62.868	-65.5649	-71.144	74.2262	-6.51409	-2.6598	-15.696	86.8126	29.0756	17.466	-18.6412	-6.32065	123.847	2.90321	-130.535
804	-32.9364	-4.61677	-3.7076	-46.3837	-449.185	-90.1511	112.935	58.4431	101.556	-62.868	-66.711	-72.411	73.4024	-7.59252	-1.68938	-16.3312	86.9255	28.7355	17.7836	-19.2118	-6.14656	123.574	2.4309	-131.418
805	-32.103	-4.34273	-5.01654	-45.4455	-449.925	-92.7513	113.346	58.8928	103.168	-64.48	-67.0463	-72.7286	72.7705	-7.23304	-1.00589	-17.2129	87.933	28.8032	17.005	-19.589	-6.91709	123.732	3.48837	-130.045
806	-30.4604	-3.54479	-3.98325	-45.5406	-449.379	-91.4794	110.943	59.0459	101.556	-64.48	-65.9018	-72.1031	72.6125	-6.8784	-1.18321	-16.4311	87.7589	28.5147	17.6869	-19.7406	-7.42487	123.437	3.07892	-130.067
807	-32.2561	-4.13156	-3.4658	-45.6083	-446.954	-94.5986	109.485	59.3474	101.556	-62.868	-65.8196	-71.9822	72.7657	-7.06862	-1.66681	-16.1023	88.7825	27.9714	17.7014	-18.5396	-6.98157	123.698	2.69526	-130.242
808	-32.7172	-4.32822	-3.5335	-45.7163	-447.54	-92.927	109.648	58.8316	103.168	-64.48	-65.2779	-72.1112	73.8296	-7.28302	-1.38471	-15.9266	88.9228	27.7119	18.4284	-18.48	-7.26851	123.466	3.519	-131.489
809	-35.2335	-3.92522	-4.09287	-46.6803	-447.91	-93.3703	107.927	59.1926	99.944	-62.868	-66.6401	-71.8823	73.0671	-6.93321	-2.75652	-15.7315	89.7046	27.1993	18.0463	-18.9281	-7.99552	123.073	3.32394	-130.854
810	-33.7424	-4.32983	-4.17669	-45.157	-445.46	-95.5884	107.782	58.3931	99.944	-62.868	-66.0356	-72.3111	72.5787	-7.44099	-3.14018	-16.652	90.2333	26.8011	18.1898	-18.1221	-8.02615	123.058	4.32822	-130.146
811	-33.2862	-4.21216	-4.13156	-45.9662	-445.974	-96.2235	110.867	58.7042	98.332	-62.868	-65.2473	-70.4234	73.3412	-6.28358	-2.93223	-17.3612	90.6508	26.5641	17.7755	-19.2118	-8.51458	124.235	2.5115	-131.367
812	-31.0552	-4.23634	-5.90959	-46.6239	-445.818	-96.5362	110.767	60.0599	99.944	-62.868	-64.8185	-71.0682	74.4115	-7.48452	-3.35457	-17.4934	90.5477	25.418	17.998	-18.5509	-9.22386	123.732	2.47603	-130.375
813	-30.9456	-4.5007	-4.50393	-44.8458	-447.011	-97.0666	112.036	59.5779	99.944	-62.868	-64.2318	-71.2133	73.6539	-6.9719	-3.26269	-16.2764	90.322	24.9344	17.6385	-18.7508	-9.43826	123.902	3.84462	-129.927
814	-30.3781	-4.56357	-3.73017	-46.1516	-446.492	-96.9666	111.937	58.7832	101.556	-64.48	-66.2032	-71.9661	72.2176	-7.67151	-3.97842	-16.9953	90.5412	25.4067	17.6949	-19.2731	-10.4796	124.079	2.49538	-131.144
815	-29.9606	-4.49264	-3.02734	-45.7631	-445.747	-97.036	112.127	58.6236	99.944	-62.868	-66.4611	-71.6099	71.971	-6.77846	-3.922	-17.0582	90.3236	25.4035	17.7304	-18.3429	-10.3764	124.06	3.01122	-131.048
816	-30.8553	-4.48458	-4.29114	-46.2531	-443.956	-98.0306	110.835	59.1394	101.556	-62.868	-66.3467	-71.9629	72.2627	-7.3072	-4.40076	-16.3086	90.9216	26.2998	18.2188	-18.3526	-10.3829	123.89	2.9693	-130.548
817	-29.7317	-4.15251	-5.21643	-47.0027	-444.259	-97.7162	110.72	58.8025	101.556	-64.48	-65.4601	-72.7286	71.6131	-7.15889	-3.86235	-16.286	89.8577	25.6115	17.8239	-18.8459	-10.9406	123.421	3.84301	-130.045
818	-30.2975	-4.0703	-4.62483	-44.6137	-445.475	-99.2363	111.581	58.8557	101.556	-62.868	-64.264	-72.2402	72.3901	-7.15406	-3.87525	-16.3279	91.3923	25.6534	17.7771	-19.1167	-11.4936	123.995	3.39326	-130.587
819	-29.7237	-3.34974	-4.83278	-46.1435	-444.591	-98.6173	110.204	59.0137	101.556	-62.868	-64.4671	-72.6399	71.5841	-6.77524	-2.31967	-16.1522	91.5294	25.5873	17.8932	-19.8373	-11.4484	123.834	2.60016	-130.99
820	-29.7043	-3.70115	-4.45234	-45.8824	-444.067	-99.5845	110.632	58.3786	101.556	-62.868	-65.0039	-71.4745	70.7974	-6.36256	-2.27453	-16.0426	91.7309	24.7039	17.6659	-18.4381	-12.0981	124.003	2.68882	-130.72
821	-30.0654	-3.44484	-3.79948	-45.8662	-442.544	-100.871	111.958	58.2964	101.556	-62.868	-64.5235	-72.6883	70.8361	-7.22498	-2.2842	-15.2076	92.6819	24.2171	17.6965	-17.9125	-11.9965	124.064	2.08109	-131.244
822	-29.556	-3.61249	-3.44001	-45.9581	-442.023	-101.427	110.337	58.9847	99.944	-64.48	-64.2592	-73.0591	71.8855	-7.0396	-2.4986	-17.2694	91.7728	24.6056	17.2194	-19.1425	-12.543	124.043	3.25463	-130.516
823	-28.8629	-3.4384	-1.78932	-46.6851	-442.191	-102.062	113.503	58.7945	101.556	-62.868	-62.2941	-72.7173	73.4895	-6.94772	-1.72323	-17.3338	91.4955	24.2413	17.9593	-18.5686	-11.2227	124.211	2.18748	-130.416
824	-28.584	-3.09988	-0.440076	-44.6943	-440.729	-101.316	111.86	58.9766	101.556	-62.868	-63.6885	-72.7834	72.669	-6.74138	-1.4234	-17.6482	92.4079	23.4836	17.9657	-19.1715	-12.3028	123.657	2.68237	-130.09
825	-31.7451	-2.55986	-0.61256	-45.6099	-441.059	-101.367	110.909	58.9573	103.168	-64.48	-64.5542	-73.0526	71.8049	-6.98802	-1.22351	-17.7223	94.0215	23.9575	18.264	-17.5079	-12.8589	124.058	1.8941	-131.012
826	-33.0637	-1.7329	0.670592	-46.2257	-440.829	-101.962	111.336	58.78	101.556	-66.092	-64.4961	-73.3927	72.0371	-7.06056	-1.90216	-18.5993	95.3143	22.8098	17.6724	-18.9104	-13.3232	124.375	2.69526	-130.97
827	-31.2406	-2.86775	0.680264	-44.8749	-440.689	-100.634	110.96	60.2775	101.556	-64.48	-63.3355	-73.8747	72.4143	-8.04227	-2.16008	-16.6407	95.1934	22.971	18.0592	-18.3462	-13.2055	123.531	1.52818	-130.575
828	-29.5496	-1.93924	0.449748	-44.2752	-440.93	-100.806	113.619	59.5054	104.78	-66.092	-63.3693	-73.2702	72.9398	-6.85261	-3.52383	-16.9776	95.0741	23.0081	17.7707	-18.4316	-12.7832	124.05	2.1633	-131.027
829	-28.2471	-2.02306	0.712504	-43.5788	-438.972	-104.205	110.146	60.1905	104.78	-66.092	-63.9271	-74.0778	71.8613	-7.36362	-2.63723	-17.1614	94.9774	22.755	17.4241	-18.5283	-12.4882	123.739	1.0204	-132.402
830	-27.7183	-2.22778	0.41912	-45.4439	-439.833	-103.403	112.608	58.809	103.168	-66.092	-64.6622	-74.4534	72.0161	-7.38296	-1.93762	-18.2108	95.1483	22.7292	17.8835	-18.6154	-13.3941	124.068	1.83284	-131.6
831	-28.0617	-2.71783	0.794716	-44.7733	-439.552	-105.389	110.251	61.5333	103.168	-66.092	-64.4478	-74.5502	72.0596	-6.78813	-1.54913	-17.5547	95.4223	22.402	17.4128	-19.2247	-13.9035	124.205	1.75386	-130.304
832	-28.3148	-2.29065	-1.17031	-44.3252	-440.485	-102.85	111.473	59.7343	103.168	-66.092	-63.9158	-75.2917	72.2934	-6.21426	-1.35086	-17.9432	96.6861	20.7174	17.8336	-17.8916	-13.9196	123.11	1.83446	-129.919
833	-28.3986	-3.224	-1.3976	-44.5347	-440.73	-105.675	113.095	59.1217	103.168	-67.704	-63.2436	-75.6995	73.2525	-6.20781	-0.54002	-18.056	96.9844	20.5385	17.0743	-17.8916	-14.055	123.665	0.720564	-131.607
834	-25.9435	-2.22778	-1.75386	-46.5529	-441.714	-104.572	111.852	59.2555	104.78	-67.704	-62.149	-75.6512	73.2041	-6.40931	-1.49594	-17.6175	97.2842	20.6787	17.9948	-17.811	-13.8116	123.444	1.74257	-131.43
835	-26.1805	-2.84679	-2.01822	-44.9442	-440.867	-106.329	111.802	59.5602	103.168	-67.704	-61.7718	-76.7489	74.1907	-7.09602	-1.86992	-19.3859	97.7356	19.3811	17.574	-18.1173	-14.4338	122.831	-0.283712	-131.626
836	-23.9043	-2.3503	-1.04619	-45.0296	-440.876	-106.977	112.711	61.0771	101.556	-67.704	-63.1711	-76.6345	73.8635	-6.92676	-1.5185	-19.028	98.4287	18.1286	17.3016	-17.5966	-14.3355	123.287	-0.905944	-131.718
837	-23.7883	-3.58831	-0.70928	-42.7438	-440.239	-109.642	111.597	59.2523	101.556	-67.704	-62.2635	-76.7151	73.9844	-7.43293	-1.07359	-18.3446	99.1154	17.8416	17.9238	-18.6621	-14.2388	123.068	-0.630292	-131.346
838	-25.1585	-2.58565	0.067704	-43.8674	-439.962	-106.018	111.863	60.7095	99.944	-66.092	-62.4811	-76.7731	74.2584	-7.29108	-0.57226	-20.1629	99.7989	17.3532	17.9142	-17.4515	-14.9739	123.403	-0.18538	-131.204
839	-25.1117	-4.06385	-0.528736	-43.0743	-439.654	-108.381	113.699	59.9261	99.944	-66.092	-63.3677	-76.5023	73.5942	-7.17179	-1.04296	-18.6331	99.6474	16.8438	17.4177	-17.7981	-14.6934	123.084	-1.3299	-130.952
840	-25.4567	-2.58726	-0.809224	-43.3435	-440.79	-107.055	114.563	60.7402	101.556	-66.092	-63.2742	-76.9762	72.9285	-6.86873	-1.03813	-19.323	99.7506	17.2742	17.682	-17.9867	-15.3172	122.701	-1.21061	-129.405
841	-25.8017	-3.91394	0.7254	-45.805	-440.348	-104.258	112.253	60.3001	99.944	-67.704	-64.5832	-76.9633	71.9419	-6.62693	-1.57009	-16.9276	98.7834	17.4999	17.4289	-17.1968	-15.0803	122.833	-2.1633	-130.195
842	-25.7984	-3.04829	1.33796	-44.0076	-438.999	-106.187	112.874	60.6886	101.556	-67.704	-64.7847	-76.4555	71.713	-6.53827	-0.59644	-17.5047	98.5528	17.7288	17.1871	-17.1243	-15.0045	123.363	-1.87476	-130.464
843	-25.8404	-2.1762	1.23318	-44.891	-438.569	-104.387	114.889	61.9282	103.168	-66.092	-63.3548	-76.0268	72.856	-5.66618	-0.114452	-17.7191	99.4443	18.4493	17.358	-17.732	-15.0641	123.636	-2.1891	-130.337
844	-28.073	-1.52818	1.31862	-45.3794	-437.544	-108.344	113.043	60.4307	101.556	-66.092	-63.6224	-76.0235	72.0387	-6.18202	-0.794716	-18.5074	100.428	19.2602	17.645	-17.4048	-15.3414	122.528	-2.42606	-129.748
845	-27.9311	-2.51956	0.986544	-45.3069	-437.826	-111.502	112.726	60.1534	103.168	-67.704	-63.5338	-77.1616	72.7802	-7.15567	-0.955916	-18.6186	100.394	20.3434	17.2694	-17.4306	-15.0206	122.472	-2.74846	-130.359
846	-27.3186	-1.64746	0.575484	-43.3289			114.242	61.4946	101.556	-66.092	-63.5241	-77.3147	72.9414	-7.26045	-1.52495	-18.3994	99.7038	20.1016	17.5386	-16.7874	-14.9739	122.367	-2.53568	-128.257
847	-27.0236	-1.61522	-0.02418	-44.1785			113.332	60.3791	101.556	-67.704	-62.2683	-76.6957	73.7974	-7.01542	-1.37826	-17.711	98.5786	20.3176	18.1189	-18.1576	-15.6896	122.196	-2.85163	-128.464
848	-24.3202	-2.34062	-0.141856	-44.488			114.7	61.2963	103.168	-67.704	-61.8299	-77.5856	75.1015	-7.32654	-1.91022	-17.5934	98.0289	20.4579	18.5122	-18.2688	-15.6622	121.982	-4.14445	-129.94
849	-22.8775	-2.92739	-0.509392	-44.3332			114.699	62.4634	104.78	-67.704	-61.2367	-76.8505	75.7688	-7.90525	-0.364312	-17.6272	98.4094	20.0791	18.1269	-17.2871	-14.7159	121.782	-4.01549	-129.034
850	-22.4052	-2.10366	-0.707668	-43.5176			114.141	60.2018	103.168	-67.704	-62.2151	-77.4034	74.0569	-7.71181	-0.639964	-17.416	98.3691	19.4826	18.1624	-16.9018	-15.2898	121.569	-2.98542	-128.443
851	-23.8302	-4.08642	-1.42178	-44.1221			112.171	61.6268	101.556	-67.704	-62.4134	-77.102	73.6136	-7.35233	-0.494884	-17.1614	99.6506	19.473	18.0866	-17.0276	-15.2124	121.295	-4.01549	-127.619
852	-20.7593	-1.54268	-1.51044	-43.2355			112.954	60.9513	103.168	-67.704	-62.6181	-77.0729	73.2686	-7.16212	-0.259532	-17.8916	101.043	19.0941	17.3757	-16.3586	-15.7766	121.193	-3.72694	-126.373
853	-19.5713	-2.35997	-2.09238	-43.9351			113.424	59.7407	103.168	-67.704	-62.112	-77.3502	74.1584	-7.51998	-1.4234	-16.5665	99.7699	19.0603	18.1076	-16.6197	-15.2173	120.836	-4.12511	-127.466
854	-19.7051	-2.76136	-1.29121	-43.927			114.545	62.0652	103.168	-67.704	-61.8879	-76.4265	75.0757	-6.89614	-1.83929	-16.7084	98.2611	18.9958	18.372	-16.9437	-15.8057	119.923	-3.67697	-125.526
855	-20.7755	-2.11011	-1.10261	-43.4224			112.405	61.8379	103.168	-67.704	-63.1017	-77.2341	73.8506	-8.06645	-1.56042	-16.5569	97.3374	19.3424	17.4499	-15.9781	-16.3022	120.51	-3.95746	-126.387
856	-18.301	-2.65335	-0.286936	-43.9463			114.505	60.4903	104.78	-67.704	-63.919	-77.1842	73.6942	-6.98641	-1.20255	-17.2339	97.5341	18.4171	18.4945	-16.0458	-16.0797	120.041	-5.50176	-126.565
857	-22.0941	-3.3046	-0.98332	-45.6277			113.445	60.8337	103.168	-66.092	-64.1512	-78.0031	74.3551	-8.2615	-0.003224	-17.3403	96.6039	18.6009	18.2124	-16.3908	-16.1264	119.12	-4.77313	-127.608
858	-21.6201	-3.25946	0.348192	-46.7045			113.382	59.9035	103.168	-66.092	-63.3258	-78.24	74.2439	-8.35016	0.49972	-17.6433	95.9882	18.8298	17.9109	-16.2457	-17.2532	119.436	-4.76507	-127.472
859	-21.1768	-2.85485	0.093496	-45.4681			112.116	61.3898	103.168	-67.704	-62.5875	-78.5237	74.8838	-8.47267	0.899496	-16.3795	96.151	17.9851	17.8255	-16.689	-16.5311	119.651	-4.60387	-126.648
860	-21.8039	-2.74846	-0.335296	-47.4138			112.284	61.5107	103.168	-67.704	-61.0239	-78.5431	75.922	-8.78218	0	-18.2543	98.1547	18.2382	18.4397	-16.6004	-16.552	119.211	-4.77313	-126.81
861	-20.071	-2.51311	-0.34658	-44.8829			111.531	60.2114	104.78	-69.316	-62.0024	-77.6613	75.3433	-7.25078	0.22568	-17.3661	99.4814	17.25	17.8271	-16.1925	-16.8921	118.677	-5.1987	-128.201
862	-21.9248	-3.0757	0.138632	-47.238			113.34	59.8939	103.168	-67.704	-62.2087	-78.0788	74.5743	-8.2083	0.577096	-17.7304	99.1686	16.7309	18.4397	-15.6412	-17.3193	118.609	-4.62322	-127.351
863	-19.3085	-1.25897	1.38793	-47.7716			113.765	59.7955	101.556	-67.704	-61.9475	-78.3658	75.9204	-8.08579	0.14508	-16.9405	98.9784	16.3183	18.6508	-16.4763	-16.7551	117.897	-4.87469	-126.523
864	-20.6417	-2.29388	-0.0403	-46.7045			110.259	61.5607	101.556	-67.704	-61.925	-78.5383	76.3604	-8.34532	0.125736	-16.6181	99.707	15.9765	18.3284	-15.5832	-17.416	117.955	-4.67964	-126.444
865	-20.063	-1.83446	1.27993	-45.0377			112.09	60.3855	103.168	-67.704	-62.3522	-78.8494	76.678	-8.65644	-0.1209	-18.8411	100.2	16.1571	18.3494	-16.1587	-17.5885	117.563	-2.75813	-126.723
866	-19.7615	-2.42928	1.4379	-46.5191			109.855	62.8261	103.168	-67.704	-62.9067	-78.7011	75.7253	-8.6113	0.425568	-19.8018	100.105	16.5133	18.1705	-16.1619	-17.6498	117.568	-4.63128	-128.349
867	-20.3805	-1.05102	1.18643	-46			111.771	62.6987	103.168	-66.092	-64.314	-78.7655	75.0612	-8.35016	1.13324	-21.1849	99.6426	16.6987	17.6562	-15.7073	-17.6498	117.454	-3.81722	-128.272
868	-20.9221	-1.70711	0.240188	-45.7518			111.089	61.2173	101.556	-67.704	-64.422	-79.3152	74.9773	-9.1352	0.888212	-19.8582	100.892	16.8486	18.3639	-16.436	-18.2301	117.726	-3.84623	-127.785
869	-21.0737	-0.925288	0.893048	-47.4041			107.773	62.8325	103.168	-66.092	-63.9464	-78.8864	75.4932	-8.72092	0.625456	-19.0812	102.286	16.5972	18.1011	-16.5149	-18.2543	117.26	-3.41099	-127.105
870	-21.3929	-1.65391	1.62812	-47.1446			111.463	62.3538	104.78	-67.704	-63.2678	-79.1363	76.541	-8.95305	-0.551304	-20.6449	103.184	16.2361	17.6337	-16.2909	-18.7846	116.981	-4.2718	-127.622
871	-21.9699	-1.0607	-0.20956	-48.6453			110.836	61.9556	104.78	-67.704	-64.4204	-78.6527	76.9553	-9.12231	-0.452972	-19.8083	104.424	15.5751	17.8642	-15.8315	-19.07	117.004	-4.24923	-127.724
872	-21.3671	-0.775372	0.976872	-49.1354			110.162	59.9777	103.168	-66.092	-63.5386	-79.2701	76.5748	-9.58334	-0.204724	-21.1688	105.283	15.1254	17.4709	-17.416	-18.4671	116.56	-2.90482	-128.177
873	-23.0726	-0.865644	0.167648	-47.3493			110.054	61.0287	103.168	-66.092	-63.8352	-78.8961	77.937	-9.35121	-0.456196	-20.574	105.476	14.7675	17.8529	-15.8782	-18.783	117.01	-2.2697	-127.208
874	-21.7265	-0.61256	0.897884	-46.4385			112.121	60.4806	103.168	-66.092	-62.7294	-78.7446	78.2126	-9.42053	-0.035464	-20.7239	106.137	13.8277	17.4596	-17.1807	-18.3704	115.866	-2.45991	-128.441
875	-19.8405	-0.997828	0.710892	-48.6099			110.406	61.4559	103.168	-66.092	-62.1603	-80.139	78.6817	-10.9213	0.412672	-21.1511	106.996	13.6698	18.4719	-15.8734	-18.999	116.17	-2.96769	-126.347
876	-19.9453	-0.85436	-0.438464	-47.5814			110.541	59.5457	103.168	-66.092	-63.8932	-78.9944	78.4818	-10.0557	-0.07254	-22.057	106.837	12.9411	18.4832	-16.2393	-18.7862	115.854	-2.04563	-127.24
877	-19.9856	-2.98865	0.75764	-49.9317			111.792	59.4183	101.556	-66.092	-63.1372	-79.1637	77.7323	-10.2507	0.077376	-21.3268	106.797	12.2399	18.6799	-16.2119	-19.8792	115.405	-2.82584	-128.328
878	-17.6304	-2.79037	-0.625456	-48.5293			111.484	60.6015	101.556	-66.092	-63.9287	-79.5071	78.1175	-10.6972	-0.5239	-20.3209	107.343	10.9439	18.7911	-16.0716	-19.8195	115.134	-2.08432	-127.611
879	-16.3054	-1.57492	2.18265	-49.2305			112.445	60.0631	103.168	-66.092	-63.2694	-79.5361	79.8553	-10.823	0.03224	-21.6153	107.646	10.2265	18.6815	-15.6364	-19.8276	115.466	-1.65391	-127.783
880	-16.2296	-2.15202	1.67164	-48.2004			112.284	59.5279	103.168	-64.48	-64.1689	-79.3862	79.7601	-11.205	1.05425	-21.999	108.352	9.63009	18.9507	-16.2748	-19.4665	114.212	-1.42984	-127.612
881	-15.5477	-2.42767	1.58621	-48.3987			111.32	59.8165	101.556	-64.48	-64.4671	-80.0052	78.016	-10.7794	0.619008	-19.7083	108.773	8.99657	18.5654	-16.2941	-20.6094	114.151	-1.65069	-126.694
882	-17.1307	-2.85969	0.53196	-51.2052			110.965	58.601	101.556	-66.092	-65.265	-79.8069	78.4093	-11.471	0.599664	-19.7567	109.622	8.55166	18.3897	-17.1082	-20.4853	114.486	-2.28743	-127.803
883	-17.703	-3.26752	2.02306	-48.9581			111.031	59.4715	101.556	-64.48	-64.2446	-80.0148	78.4464	-10.3281	-0.351416	-19.5665	110.915	7.85044	18.9765	-16.8518	-20.6288	114.312	-2.27453	-127.032
884	-18.2575	-1.5991	2.5921	-49.3594			112.88	58.9363	101.556	-64.48	-65.4811	-79.6489	79.873	-10.4038	-0.562588	-19.3617	110.14	7.81659	19.8324	-16.2393	-20.6513	114.507	-2.84518	-127.574
885	-17.5289	-3.02895	3.4787	-50.6893			111.918	59.7165	103.168	-64.48	-64.667	-80.3485	79.8633	-10.8181	-0.377208	-18.6009	109.834	7.71987	18.8668	-16.3392	-21.1059	114.494	-2.78876	-126.863
886	-16.8921	-2.5518	1.80222	-50.0413			114.528	60.1631	103.168	-64.48	-66.7029	-80.8192	79.2072	-11.1567	-0.99944	-18.7379	109.816	6.66884	18.7717	-16.8502	-20.906	114.545	-2.45991	-125.525
887	-18.0044	-2.83551	2.17942	-51.9644			114.428	59.1668	101.556	-64.48	-67.6847	-79.8665	78.3771	-9.79129	-0.697996	-18.9571	111.473	6.24166	19.2973	-16.6149	-21.5653	114.642	-1.60072	-126.668
888	-17.7062	-2.02951	2.24068	-48.7662			113.311	60.3194	101.556	-64.48	-66.1984	-80.2873	79.0396	-10.204	-0.398164	-19.9453	111.546	6.66078	18.5944	-17.0501	-20.9302	114.639	-0.917228	-126.492
889	-16.0378	-2.15202	3.21272	-49.5045			112.485	58.9073	101.556	-64.48	-66.4208	-80.0052	78.7897	-10.2749	-1.17676	-18.9652	112.888	7.09119	19.6761	-17.0969	-21.1091	114.112	-3.33523	-124.579
890	-16.6197	-3.20304	3.33684	-48.8291			115.385	58.8299	101.556	-64.48	-67.6847	-79.6715	79.1025	-10.4167	-1.37504	-18.8652	113.043	6.87518	18.6895	-16.1168	-21.4315	113.783	-2.11333	-126.465
891	-16.9518	-1.54913	5.50014	-47.101			117.594	59.7439	103.168	-64.48	-67.9152	-79.9762	78.0659	-9.95088	-1.11712	-20.1758	112.053	6.21587	18.0012	-16.8889	-21.5331	113.538	-2.48409	-125.265
892	-16.7503	-2.68237	3.99292	-49.0048			118.379	58.0384	103.168	-64.48	-68.5439	-79.7892	77.9982	-10.096	-0.759252	-18.9861	113.008	5.79353	18.5299	-16.336	-21.2429	114.433	-2.24552	-124.635
893	-15.2318	-4.07997	5.76612	-49.6335			119.818	58.6462	103.168	-64.48	-68.7163	-79.9633	78.3851	-10.9503	-0.299832	-19.265	114.154	5.43728	18.6428	-16.2473	-21.9216	113.847	-1.81028	-123.984
894	-13.1781	-2.50505	6.72688	-50.3073			117.716	59.4747	103.168	-64.48	-68.4423	-80.8208	79.3088	-11.6854	-0.860808	-19.8695	114.329	4.67158	18.1576	-16.6778	-21.7797	113.951	-2.97898	-122.612
895	-14.6966	-2.59371	7.30397	-50.8683			119.191	58.6494	103.168	-64.48	-69.0194	-80.5146	80.9804	-10.5925	-0.438464	-19.5842	115.551	2.9419	18.5783	-18.1624	-22.1537	114.115	-3.26752	-121.724
896	-16.8809	-3.08053	6.77846	-49.1805			118.571	60.0841			-70.9828	-80.2744	79.1685	-10.9374	0.573872	-20.4321	116.399	3.1031	17.8352	-17.3274	-21.5927	114.183	-3.99131	-122.136
897	-17.7933	-2.58081	6.51409	-49.6673			118.363	58.485			-70.1059	-79.9665	79.0267	-11.3936	-0.025792	-18.5009	116.48	2.09882	18.4526	-18.1769	-22.2359	114.172	-3.93167	-120.84
898	-17.2855	-2.58404	6.21587	-50.1896			118.069	59.7053			-68.9291	-80.4984	78.6898	-11.9498	-0.283712	-19.7019	115.816	1.84252	19.2457	-17.329	-21.849	114.201	-5.06813	-120.748
899	-16.4537	-3.5593					118.102	60.0131			-70.2397	-79.3733	79.0235	-11.1857	-1.33796	-19.5391	115.846	0.976872	17.9013	-17.8223	-22.0699	113.786	-4.01872	-120.486
