# Supplementary material for: Cells use molecular working memory to navigate in changing chemoattractant fields
Source: eLife. 2022 Jun 6;11:e76825. doi: 10.7554/eLife.76825 (PMC9282860; doi:10.7554/eLife.76825)
Supplement: Figure 4—source data 1. [file elife-76825-fig4-data1.xlsx]

## Sheet: 4D
	Cell 0	Cell 1	Cell 2	Cell 3	Cell 4	Cell 5	Cell 6	Cell 7	Cell 8	Cell 9	Cell 10	Cell 11
1	-0.406833	-0.412168	-0.251634	-0.681397	nan	0.937616	0.990283	-0.629902	nan	0.993462	-0.114607	-0.581939
2	0.365976	-0.263864	-0.708616	0.911832	1	0.0491909	0.784492	0.33193	nan	-0.127101	-0.950488	-0.0198212
3	0.709211	-0.259941	0.336708	-0.984851	-0.707107	-0.901979	-0.941987	0.862169	nan	-0.854657	0.77407	0.967303
4	-0.679765	0.342398	-0.12724	-0.333052	nan	-0.345962	-0.591875	-0.70136	-1	0.881266	0.903703	0.960268
5	-0.366712	-0.453817	0.494839	-0.888975	0	-0.114191	-0.558419	0.419627	nan	-0.854199	0.791347	-0.996935
6	0.692675	0.945208	0.208269	0.663434	0.707107	-0.985582	-0.927972	-0.874915	nan	-0.997681	-0.440533	-0.283668
7	0.515829	-0.839042	0.121978	-0.979179	-1	-0.701052	-0.316228	0.86643	-1	0.967673	0.24459	0.430023
8	-0.991293	0.117921	0.381508	-0.756155	1	-0.196116	0.367022	0.959406	nan	-0.208415	-0.894427	-0.56894
9	0.420615	0.276954	0.466222	0.998727	nan	-0.457752	0.338796	-0.803245	nan	0.996821	-0.915952	0.606961
10	0.979291	0.935709	0.853933	-0.143862	-1	-0.805155	-0.94161	0.109202	nan	-0.982797	0.927173	0.231278
11	-0.730826	-0.78607	-0.949395	-0.791253	0.707107	-0.707107	-0.263897	0.818916	nan	0.681481	-0.550823	-0.575383
12	0.807724	-0.523686	-0.525293	0.662976	nan	-0.266118	-0.52869	-0.740224	nan	-0.634467	0.983973	0.827389
13	0.107098	-0.186227	0.919923	-0.831421	nan	0.427212	0.993998	-0.532839	nan	0.866421	-0.370621	0.549332
14	0.107345	-0.935628	0.287767	-0.994971	nan	-0.775853	0.447214	0.985592	-1	-0.392492	0	0.965595
15	0.999599	0.806132	-0.967333	-0.491825	1	0.111388	0.110239	0.288907	nan	0.987081	0.315089	-0.417419
16	-0.923347	0.711328	0.98631	0.441192	-1	-0.796658	-0.999277	0.992713	nan	-0.684754	-0.315089	0.174062
17	0.946274	-0.796393	-0.785095	-0.458131	1	-0.943398	-0.68607	0.988092	-1	-0.887708	0.909633	0.181537
18	-0.390986	-0.359513	-0.94232	0.0200852	nan	0.77962	0.992547	0.941075	1	0.970603	0.963903	0.269235
19	0.99853	-0.456516	0.919244	-0.997313	nan	-0.653854	-0.996531	-0.61269	-1	0.999839	-0.905492	-0.881256
20	0.300354	-0.0283173	0.00748482	0.99597	0	-0.0756065	0.276028	0.886133	1	-0.992188	-0.188718	-0.622209
21	0.166928	0.0178543	0.994701	0.219038	1	0.995479	0.92184	0.156216	-1	-0.484061	0.602286	0.999767
22	0.655687	0.151312	-0.897374	0.36134	0	-0.849123	-0.258181	-0.6	1	0.0539753	0.144486	0.100114
23	0.19925	-0.632856	0.209254	-0.0722743	nan	0.193786	-0.188454	0.46681	-1	0.664578	0.719069	-0.897417
24	0.0784744	0.743939	0.149341	0.795122	1	-0.028137	0.0835453	-0.332186	1	-0.979106	-0.00668137	0.534347
25	0.281826	-0.411638	-0.636897	0.513967	nan	0.0759612	0.999646	0.522025	nan	-0.225358	-0.505629	-0.974051
26	0.0459636	-0.801445	-0.962103	-0.684611	1	-0.00225479	-0.872035	0.202039	nan	-0.279175	-0.0414559	0.869359
27	0.900382	0.21276	0.980929	0.170883	0.707107	0.720427	0.748268	0.77445	-1	0.933285	-0.00120773	-0.699415
28	-0.259171	-0.892334	-0.490042	0.729537	0	-0.82373	-0.901412	0.443764	1	-0.944678	-0.927471	-0.829242
29	0.855793	0.823351	-0.890339	-0.473833	1	-0.826411	-0.950504	-0.942103	nan	0.966937	0.980752	0.907332
30	0.210024	-0.24018	0.243151	0.859482	0	-0.027649	0.665806	0.855834	nan	-0.666506	0.582385	0.994685
31	0.146549	-0.707107	0.999975	0.985802	0.707107	-0.184182	0.94284	-0.704012	nan	-0.962115	-0.910665	-0.72197
32	0.548958	0.000577701	-0.913676	-0.978451	0	0.179687	-0.473423	-0.419166	-1	0.950352	0.999906	-0.682859
33	-0.716759	0.7985	0.836048	-0.0594971	0.707107	-0.864051	0.869255	0.535684	nan	-0.964116	-0.625011	0.994635
34	0.777043	0.252012	-0.878295	0.298441	-0.707107	-0.991841	-0.433223	0.0358621	1	0.997235	0.972823	0.00768753
35	-0.997585	-0.325891	0.997937	0.414256	0.707107	0.162113	0.0760945	0.770962	nan	-0.245523	-0.987182	-0.304226
36	0.239628	-0.116453	-0.999917	0.428954	1	0.00310799	0.228004	-0.230501	nan	-0.124375	0.956163	0.42234
37	0.842922	-0.99495	-0.725778	0.990156	nan	0.675621	0.0954801	-0.380879	nan	-0.999519	-0.214331	0.908281
38	0.625652	0.941742	0.155066	0.555796	1	-0.948683	0.582688	0.942746	nan	0.5757	-0.338856	0.998875
39	0.98099	0.894848	-0.633812	0.468965	0.707107	0.145544	-0.85098	-0.816236	-1	0.528858	0.233612	-0.218658
40	-0.92978	0.695925	0.639672	-0.997925	nan	0.687663	0.406582	0.995524	1	-0.220617	-0.915884	-0.799585
41	-0.132478	-0.826864	-0.5092	0.930198	0	-0.62733	-0.794706	0.245443	nan	0.173281	0.93525	0.423983
42	0.119732	-0.182666	0.747509	-0.80097	1	0.985081	-0.745743	0.824442	nan	0.270746	0.168986	-0.832911
43	0.598151	-0.562887	-0.886615	0.983305	0	-0.221997	0.992596	-0.979671	nan	-0.745793	-0.489048	0.595705
44	-0.588545	0.999933	0.99943	0.595272	1	0.884112	0.734993	0.0785205	nan	0.49044	0.597441	-0.409403
45	-0.570488	0.352893	-0.682533	0.575404	nan	-0.500202	-0.682025	0.8	nan	0.99734	-0.998982	0.626846
46	0.578575	0.99846	0.887292	0.954203	nan	-0.896527	-0.0903976	0.0865287	nan	-0.883357	0.988111	0.564337
47	-0.997723	0.998308	0.36129	0.894916	0.707107	0.0646466	-0.582299	-0.976143	nan	0.880006	0.910309	0.296209
48	0.957346	0.30743	0.642022	0.904142	0	0.765426	0.0148744	0.850843	nan	0.366101	-0.858335	-0.99675
49	-0.677303	-0.26436	0.963518	0.728268	nan	0.964508	0	0.899657	1	0.286637	-0.976524	0.181297
50	0.665022	-0.877328	0.512278	0.999832	0.707107	0.739706	0.520865	0.248861	nan	-0.927835	-0.174735	-0.999993
51	0.425797	-0.742961	0.790257	0.997684	1	0.614927	0.719243	-0.427168	-1	0.844722	0.646835	0.140855
52	-0.12958	0.604066	0.594964	0.847627	-1	0.871646	-0.75417	0.686424	1	-0.0278961	0.781056	-0.0164347
53	0.498208	-0.622577	0.983989	0.605598	1	0.631502	-0.421881	0.0663356	nan	0.773073	-0.613362	0.722227
54	0.152427	0.428515	0.993554	0.865366	0.707107	0.485502	0.904819	0.646403	nan	0.0103621	-0.858162	-0.964315
55	0.307245	-0.381249	0.864823	-0.499681	-0.707107	-0.331516	-0.972949	-0.818209	nan	-0.872468	0.704922	0.252513
56	-0.700209	0.323993	0.593523	0.998873	1	0.951047	0.883966	0.809272	-1	0.471003	0.29701	0.760958
57	0.800664	-0.0361693	0.601596	0.956703	nan	0.59575	-0.789987	-0.879656	1	-0.455381	0.401877	-0.183569
58	-0.990904	-0.0474243	0.940412	0.856848	0	-0.137763	-0.669741	0.964083	nan	-0.97068	0.991663	-0.0558693
59	-0.975133	0.953994	0.998547	-0.207859	1	0.999664	0.951	-0.97545	nan	0.326273	0.506422	-0.690932
60	0.0960248	-0.64498	0.978996	0.888666	0.707107	0.653088	-0.0584772	0.87939	nan	0.575929	-0.414899	-0.541446
61	-0.272863	0.0828064	-0.854286	-0.83279	nan	-0.0901212	-0.547249	-0.953674	1	0.117327	0.52128	0.966776
62	0.999942	-0.113936	0.943645	0.981849	0	0.936217	-0.0741542	-0.955779	-1	-0.0196742	0.0261349	-0.0175412
63	-0.767005	0.817806	0.977327	0.558153	1	0.91311	-0.962206	-0.180497	nan	-0.855732	-0.723922	0.998053
64	0.856231	-0.984116	0.488168	0.467438	0	0.871516	-0.145921	-0.370809	nan	-0.955942	0.99712	-0.906953
65	-0.257493	0.280089	0.928924	0.234358	nan	0.456076	-0.3805	0.399182	nan	0.986504	-0.802764	0.839183
66	-0.175664	-0.0875361	-0.521638	-0.0109283	1	0.98499	0.962206	0.579819	nan	-0.270085	0.789744	-0.942695
67	0.134771	-0.910853	0.983664	0.275716	0	0.896352	-0.721387	-0.080166	nan	0.733594	-0.564796	-0.491621
68	-0.515461	-0.924532	0.974642	0.991778	nan	0.985358	0.811343	-0.136042	nan	-0.831807	0.640392	0.986178
69	-0.0804917	0.484669	0.320986	0.887415	1	0.916046	0.663999	0.949224	1	-0.13979	-0.205653	0.843986
70	0.671839	-0.784091	0.749781	0.882116	1	-0.858622	-0.0535424	-0.189024	nan	0.970199	0.318577	0.691223
71	0.878835	0.395177	0.726575	0.797802	nan	0.946301	0.793091	-0.904249	nan	-0.864674	0.908757	0.604076
72	-0.433217	0.990591	0.929309	0.974279	1	0.238087	-0.167729	-0.745056	nan	-0.462457	-0.391405	-0.922315
73	0.299607	-0.717951	0.765417	0.817268	0	0.611734	0.971427	0.788138	1	-0.943659	0.816335	-0.999003
74	0.537527	-0.352181	0.96916	0.892819	nan	0.32671	-0.626069	0.710242	nan	0.853161	-0.997817	0.998852
75	-0.991187	0.377824	0.987662	0.754096	nan	0.998669	0.9497	-0.095575	nan	-0.886439	0.33071	0.570955
76	0.983518	-0.111532	0.557817	0.419677	0.707107	-0.113838	-0.618014	0.535907	nan	0.992931	0.573033	0.21745
77	0.348032	-0.596492	-0.306009	0.998611	0	0.941771	0.942451	0.619559	1	-0.998021	0.383903	-0.819606
78	-0.127562	-0.945974	0.361129	0.992014	1	0.985878	0.985667	-0.151421	-0.0982624	0.993184	-0.337849	0.66139
79	0.608041	0.994154	0.25058	0.887845	nan	0.802668	-0.181319	-0.305801	0.928146	-0.93304	0.659341	-0.676685
80	0.748362	-0.972387	0.988844	0.36629	nan	0.828341	0.669965	-0.914511	-0.173041	0.888151	0.698362	-0.525969
81	-0.0643649	0.999677	0.990647	0.785231	nan	0.806709	0.777492	0.358979	0.265855	-0.99783	0.97968	0.442981
82	-0.869006	0.373413	0.96167	0.616746	0.447214	0.686581	0.871415	0.0612058	nan	-0.226067	-0.271307	0.29319
83	0.796237	0.223898	0.977644	0.953739	-1	-0.949375	-0.378009	-0.599651	0.195808	-0.899557	-0.0864103	-0.228743
84	-0.676155	-0.999206	0.9927	-0.556534	0.707107	0.948881	0.86689	0.981827	0.147645	0.989598	0.999941	-0.156405
85	-0.99951	0.600226	0.66686	0.496663	-0.707107	-0.620216	-0.666685	0.997158	0.00229094	-0.913614	-0.985183	0.38274
86	-0.0389315	-0.461291	0.958922	0.0690655	1	0.988002	0.922963	-0.869593	0.111978	0.987321	-0.361591	0.530125
87	0.255683	-0.993492	0.87755	0.992458	0.707107	0.627666	0.986221	0.59279	-0.0263676	-0.941694	0.982034	0.16309
88	-0.115522	0.306353	0.9995	-0.63563	nan	-0.966382	0.786664	-0.304351	0.154642	0.0269788	0.971615	-0.237715
89	-0.029317	-0.459305	0.838058	0.464802	nan	0.327736	0.607637	0.900814	0.452736	-0.811924	0.456139	0.962783
90	0.580338	-0.82687	0.615256	-0.109402	0	0.527363	0.659779	-0.633882	-0.21246	0.912228	-0.609916	0.976187
91	-0.741892	0.826713	0.9812	0.34465	nan	0.998306	0.841311	0.573895	0.824956	-0.895227	0.513969	0.947066
92	-0.254682	-0.927299	-0.253647	-0.133804	0	0.111669	0.170673	0.512678	-0.132757	-0.571605	0.993008	0.346779
93	0.999887	-0.994075	0.45812	0.643248	0	0.39159	0.788076	-0.999838	0.680451	0.989949	0.498049	0.24985
94	-0.0703101	0.927867	0.985566	0.154011	nan	0.0432927	0.991767	0.364174	0.421772	0.640816	-0.955645	-0.784004
95	0.747286	-0.754443	0.945729	0.959602	1	0.957407	0.999793	0.215226	0.814191	-0.969042	0.748646	0.976399
96	0.962493	-0.110122	0.834668	-0.458289	nan	-0.225006	-0.0851488	0.131501	0.340076	0.864464	-0.151136	0.47009
97	0.458126	0.766036	0.987364	0.99995	0	0.824129	0.611448	-0.999554	0.999676	-0.99486	-0.917783	-0.822328
98	0.89047	-0.515014	0.83166	0.262649	0.707107	0.557751	0.80812	0.626172	-0.180459	0.856359	0.805995	0.980803
99	0.890447	-0.40218	0.465423	0.566175	nan	-0.58904	0.236956	-0.458491	0.87304	-0.534019	0.656781	-0.875927
100	-0.678035	-0.374966	0.404948	-0.289116	0	0.30457	0.353597	0.820398	-0.159372	0.496139	0.986112	0.853067
101	0.550511	0.663105	0.387185	0.973015	1	-0.671143	0.733636	-0.913937	0.280072	0.212757	-0.650122	-0.691278
102	0.494764	0.13319	0.721582	-0.425406	1	0.634837	0.868691	0.599679	0.988001	-0.850643	-0.950763	0.99647
103	0.832695	0.692194	0.669122	0.573064	0	0.19367	0.0572573	0.931777	-0.109289	0.408131	0.563962	-0.150481
104	0.153306	-0.344934	-0.825851	0.987078	-0.707107	-0.325204	-0.991103	0.506549	0.124035	-0.245938	-0.743294	0.141858
105	0.565881	0.710493	0.975457	-0.686554	0.707107	0.63653	0.553793	-0.704357	-0.255549	0.768348	-0.410365	0.970202
106	-0.811132	-0.62924	-0.597824	-0.0746045	0	0.541246	0.38964	0.148082	0.994041	-0.70119	0.867049	-0.984917
107	0.738616	0.29919	0.78123	-0.470787	1	0.990314	0.991228	0.263401	0.999201	0.97152	-0.0691699	0.52872
108	0.362034	0.0479345	0.997575	0.787603	0	0.911651	0.215842	-0.934488	0.532231	-0.900375	-0.0391266	-0.91065
109	0.60721	-0.0669749	0.814815	0.115479	nan	0.920331	0.0403341	0.466974	0.852998	0.257955	0.919843	0.994149
110	0.445892	-0.991641	-0.0427241	0.360244	nan	-0.120924	-0.900439	-0.457494	0.359906	-0.926467	-0.131902	0.31915
111	0.524798	0.355857	0.990379	0.664511	nan	0.498705	0.731102	-0.365851	0.789518	0.715291	-0.809146	-0.897527
112	0.915043	-0.780459	0.0969438	0.278924	0.707107	0.389149	0.307564	-0.659072	0.724233	-0.480833	0.920593	-0.820634
113	0.999714	0.689149	0.714459	0.00634237	nan	0.949498	0.896792	0.366709	0.684164	0.655553	-0.263296	0.994978
114	0.904339	0.554996	0.237166	0.983506	nan	-0.713623	-0.934384	0.29699	0.522776	-0.718585	0.0200964	-0.446901
115	-0.101864	-0.647359	0.999972	0.604889	0	0.11268	0.261415	-0.459423	0.841866	0.792801	0.00409497	0.64085
116	0.545673	0.997946	-0.527841	0.527363	0.707107	0.963007	0.992031	-0.982175	0.197381	-0.786469	0.206346	-0.381716
117	0.272434	-0.295684	0.30896	0.0333148	0	0.0664374	0.175193	-0.938584	0.635805	-0.985186	-0.868583	-0.917617
118	0.665044	-0.165462	0.919207	-0.376433	1	0.989714	0.635519	0.731008	0.472786	-0.355995	0.676937	0.975964
119	0.0627854	0.185137	-0.768551	-0.951223	-0.707107	-0.596208	-0.274234	0.999656	0.991988	0.522477	-0.4183	-0.248243
120	0.502431	-0.511178	0.656365	0.695628	0.707107	0.503616	0.829025	-0.494302	0.869524	-0.694753	0.960334	-0.539967
121	0.130938	0.28038	0.79918	-0.0363396	0	-0.137153	-0.540193	0.345648	0.843986	0.996451	-0.925911	0.681743
122	0.782254	-0.117461	0.999975	0.955475	1	0.124035	-0.318149	-0.475675	0.798538	0.378737	0.792434	0.0978883
123	0.0276711	-0.28955	-0.547191	0.990647	nan	0.567334	0.989732	0.089007	0.9675	-0.411108	-0.999346	0.687077
124	0.705359	0.521547	0.701151	-0.473187	1	0.891033	0.513044	-0.995365	0.885768	-0.999388	-0.471825	-0.746948
125	0.81228	-0.0733752	0.992423	0.568682	0	0.328827	0.797521	0.671815	0.675158	0.309738	-0.853811	0.346031
126	-0.225068	0.935668	0.646092	-0.345936	nan	0.0672866	0.104578	-0.916216	0.14958	0.489443	0.975758	0.943425
127	0.999963	-0.109967	0.152635	0.966891	nan	0.1395	-0.397565	0.266177	0.963993	0.944278	0.842013	-0.55769
128	0.722951	-0.342647	0.983239	-0.997854	0	0.999503	0.999564	-0.958248	0.823508	-0.608506	-0.980032	-0.999744
129	-0.349527	-0.468536	0.970496	0.202338	0	-0.0953963	0.0825281	0.903154	-0.132453	-0.407124	0.73556	-0.757917
130	0.794445	-0.388972	0.456879	0.72125	0	-0.0169228	-0.967476	0.166178	0.682849	-0.616227	0.119482	0.437828
131	0.968277	-0.776483	0.979824	-0.961142	1	0.998121	0.606584	0.39234	0.378319	0.992683	0.0911848	0.775655
132	0.369151	0.0557074	0.975865	0.878402	1	0.863408	0.547678	-0.636986	0.749667	-0.154681	0.525149	-0.0648575
133	0.903426	-0.690764	-0.966705	0.163902	-1	0.978408	-0.804433	-0.967351	-0.134567	0.00952338	-0.989136	0.465515
134	0.944051	0.794238	0.976342	-0.975441	1	-0.162161	0.356097	0.0309929	0.40842	-0.781528	-0.851848	0.140307
135	0.360962	-0.970835	0.23585	-0.267371	nan	0.170631	-0.00125156	-0.577957	-0.113394	0.398122	0.290769	-0.99764
136	0.581922	-0.0285598	0.771459	0.983547	nan	0.878611	0.547434	0.896108	0.170511	-0.0647986	0.793446	-0.305428
137	0.823915	0.871017	0.289033	-0.863574	nan	1	0.668503	-0.938401	-0.668679	0.292504	0.783595	0.576771
138	0.465746	-0.723836	0.863164	0.897266	nan	-0.0357861	-0.57896	0.354443	0.999831	-0.287348	-0.50591	-0.288346
139	0.365439	0.967241	0.0360776	0.16076	0	0.766452	-0.0239739	0.0392778	0.113105	0.707107	-0.963034	0.436991
140	0.779499	0.911417	0.999218	-0.131526	1	0.81041	0.130958	-0.894427	0.510085	-0.777984	-0.250398	0.341184
141	0.0508774	-0.499114	0.767984	0.965094	1	0.933628	0.302282	0.512372	-0.496639	0.830267	0.435561	-0.149715
142	0.999171	0.900159	0.786063	-0.109655	0	0.596499	0.196272	0.519561	0.993821	0.616098	0.881767	-0.367378
143	0.47576	0.657987	0.97939	0.785356	0	0.226082	0.670164	-0.949086	-0.643439	-0.0198327	-0.993522	0.76611
144	-0.479385	-0.998955	-0.464834	0.937425	nan	0.745071	-0.945228	0.0235923	0.644003	-0.534134	0.999623	-0.865137
145	-0.14422	-0.917427	0.687791	0.98578	nan	-0.75881	0.787187	-0.594391	0.28169	0.837916	0.0103801	0.374099
146	0.40011	0.541701	0.973832	0.837611	0	0.665074	0.499263	-0.266456	0.00870373	-0.942317	0.431708	0.259401
147	0.815383	0.599586	0.646114	0.997698	0.707107	0.858751	-0.0345705	0.365652	-0.337073	0.608126	-0.669769	0.41222
148	-0.301738	0.220078	0.7748	0.844632	nan	0.883305	-0.15678	0.225148	0.746208	0.938917	-0.670554	-0.99335
149	0.930255	-0.937798	0.540484	0.994557	0	0.370218	-0.733549	-0.0220211	-0.649546	-0.957368	-0.0128195	0.867358
150	0.642291	0.864977	0.766848	0.701618	0	0.866635	0.663774	0.970912	-0.138512	0.977521	0.26931	-0.457111
151	0.260186	-0.943435	0.927694	0.931243	1	0.982499	0.68124	-0.567209	0.763501	0.414811	0.997999	0.303683
152	-0.345255	-0.402262	-0.919809	-0.208206	0	0.570719	-0.209451	0.539299	0.946941	0.582441	-0.900883	-0.377069
153	0.719275	-0.140888	0.630938	0.634022	nan	-0.176453	-0.785138	-0.583299	-0.383104	-0.833154	0.795767	0.200811
154	0.245706	0.682025	0.0941611	0.948241	nan	0.673031	-0.700071	0.810571	0.70659	0.875661	-0.372039	0.374745
155	0.559086	0.999814	0.821147	0.901829	1	0.854132	0.547996	-0.893388	-0.99824	-0.574593	0.217324	0.995985
156	0.0728537	-0.653917	0.816519	0.367576	1	0.836025	0.952926	-0.682025	0.584201	0.992252	0.360349	-0.993499
157	0.833391	-0.400409	0.652462	-0.0860433	1	0.971466	-0.953849	0.952424	0.992997	-0.949879	-0.714902	0.698599
158	0.984158	0.29113	0.47106	0.914386	-0.707107	0.480036	-0.444301	-0.869375	0.075939	-0.933346	0.997353	-0.608713
159	-0.302244	-0.367981	-0.0651877	0.903565	-1	0.604386	0.898581	0.807365	0.610641	0.787591	-0.923045	0.12298
160	0.925207	0.239479	0.950531	0.991656	1	0.831279	-0.641397	-0.962801	-0.0259092	-0.734099	0.968323	-0.932714
161	0.783448	-0.0216608	0.533366	0.991614	1	0.277358	0.830165	0.998357	0.437655	0.00584785	-0.96587	0.868025
162	0.648466	-0.800902	0.843	0.964764	nan	0.976146	0.0398922	0.419759	-0.701572	-0.97356	-0.832901	0.160396
163	-0.501471	0.810937	0.603294	-0.964564	nan	-0.330528	-0.716766	-0.933046	-0.99277	0.989907	-0.972065	0.725738
164	0.78821	0.0101303	0.969777	0.704502	-1	-0.950124	-0.203313	-0.0133321	0.949395	-0.35018	0.820192	-0.932361
165	-0.911505	0.37226	-0.272863	0.958199	1	0.740647	0.01293	-0.564684	0.926141	0.0802006	-0.836452	0.879327
166	0.991496	0.105294	0.552417	0.176772	nan	0.66749	0.624952	0.784797	0.662506	0.284393	0.984332	0.543663
167	0.652216	-0.345778	0.545763	-0.994238	nan	0.975183	0.802744	0.0570498	-0.996857	-0.0425147	-0.996197	-0.89188
168	0.35055	-0.427851	0.888975	0.999766	nan	0.794458	0.981863	0.358979	0.389859	-0.806703	0.982804	0.602297
169	0.969452	0.0102559	0.21693	0.957937	nan	0.28	-0.987167	-0.0781541	0.59672	0.713471	0.972657	-0.980027
170	0.779213	0.110282	0.42975	0.961167	nan	0.954608	0.545456	0.993363	-0.972281	-0.0931188	-0.778802	0.700478
171	0.930124	-0.405933	0.671882	0.822399	nan	-0.536421	-0.208039	-0.958236	0.728794	0.289351	-0.598331	0.366803
172	0.999666	0.0486855	0.876537	0.757609	nan	0.959322	0.749838	0.9818	0.362446	-0.0458975	0.72754	-0.371391
173	-0.676625	0.138598	0.655243	0.893801	0.707107	0.99984	0.146304	-0.967303	0.182766	0.358636	-0.859079	-0.915825
174	0.75149	0.244723	0.702174	0.0701393	-1	0.162105	0.306609	0.420124	0.61952	-0.268284	0.613697	0.390317
175	0.524623	-0.14658	0.68218	0.985323	0	0.731527	0.949511	0.785227	0.815507	-0.518746	0.987241	-0.640229
176	0.0908318	0.11293	0.821733	0.683788	nan	0.674127	-0.722462	0.954608	-0.499722	-0.185677	0.999181	0.589061
177	0.808028	0.653527	0.713558	0.91197	0	0.275767	0.364307	-0.180104	-0.00308165	0.806529	-0.805078	-0.999994
178	0.717514	-0.480084	0.883135	0.992988	0	-0.226741	0.953195	-0.813438	-0.919606	-0.0813052	0.980857	0.585167
179	0.913812	0.43212	0.845939	-0.413803	0	-0.985168	0.121987	-0.839233	-0.863629	0.0217565	-0.185059	-0.714309
180	0.943188	0.0884596	0.580081	0.845699	0	0.119145	0.067105	0.158315	-0.275016	-0.704764	0.982683	-0.779491
181	-0.636212	0.572109	0.871852	-0.489251	-0.707107	0.999755	0.626101	0.219299	0.903128	0.993257	-0.363017	0.955111
182	0.729208	-0.321146	0.564854	0.985333	0.707107	0.0534035	0.377748	-0.892318	0.899729	-0.97309	-0.480833	-0.728671
183	0.13598	0.26262	0.858365	-0.108092	0	0.959898	0.191589	-0.196116	-0.961148	0.924335	0.975302	0.932568
184	0.265481	0.566832	0.752838	0.997715	0	0.56921	0.987249	0.685116	0.0885972	-0.995908	-0.636471	-0.782325
185	0.25409	0.304541	0.872158	0.172833	0	0.442292	0.957975	-0.586557	0.995666	0.657017	-0.460181	-0.994717
186	0.830286	0.151183	0.851347	-0.438314	nan	-0.229452	0.776225	0.141741	-0.781622	-0.124035	0.984411	0.999094
187	0.51064	0.694035	0.853507	0.208108	nan	-0.774054	-0.497046	-0.607246	0.988372	0.131357	0.312641	0.995906
188	0.261951	-0.688236	0.766014	0.118999	nan	0.960054	-0.277161	0.925456	0.604241	-0.396251	-0.999984	-0.693049
189	0.494562	0.498678	0.677537	0.990868	1	0.319965	-0.75167	-0.948921	0.647141	-0.423827	0.96485	0.703163
190	0.512313	-0.254124	0.717581	0.295562	nan	-0.27187	0.414482	0.846083	0.0347438	0.437021	-0.103767	0.538423
191	0.105786	-0.660686	0.685694	0.313902	nan	-0.567318	0.379556	0.170442	-0.0671429	-0.987869	0.773686	-0.457769
192	-0.268243	0.680168	0.694067	0.978413	-0.707107	0.800409	0.103427	-0.686677	0.0340711	0.447214	0.659438	0.991758
193	0.598591	0.124557	0.99406	-0.605619	0	0.131809	0.715474	0.205215	0.0197981	0.639879	-0.147033	-0.842313
194	0.703356	0.110627	0.923465	0.988232	0.707107	0.606449	0.567148	-0.0888491	0.985351	-0.297237	0.191352	0.83878
195	0.545343	0.090065	0.8012	0.808408	-0.707107	-0.978904	-0.349616	0.69731	0.277726	-0.699173	-0.302934	0.993988
196	-0.268385	-0.106491	0.879714	0.983842	0	-0.271935	0.585149	0.31896	0.979428	-0.819868	0.489486	0.666416
197	0.488909	-0.313858	0.995229	-0.777095	1	0.980757	0.0285924	-0.77816	-0.904912	-0.873508	-0.982069	-0.696741
198	0.0952824	-0.15518	0.673086	0.726065	-0.707107	-0.718098	0.167155	0.817628	0.874157	0.969617	0.58478	-0.244027
199	-0.308921	0.578954	0.934203	0.621451	1	0.621672	0.969851	0.855032	0.0333531	0.877585	0.733728	0.792912
200	0.657786	0.46948	0.910776	0.782863	0	-0.0842762	-0.691571	-0.869578	0.320979	0.247947	-0.706003	0.450699
201	0.0136786	0.22074	0.90709	-0.0456255	nan	-0.655703	-0.121319	-0.551129	-0.088029	-0.567901	0.234975	-0.986969
202	0.249662	0.641579	0.790935	0.321552	1	-0.867457	-0.217341	-0.451791	0.999896	0.36251	0.227539	-0.993371
203	0.311477	-0.389063	0.495382	-0.846776	-0.707107	0.928275	0.914729	-0.101173	-0.634978	-0.529324	0.382474	0.917162
204	-0.549178	-0.00900864	0.964483	0.941742	0	-0.0195141	0.214197	-0.0951898	-0.876947	0.908458	-0.331641	0.903804
205	-0.105106	0.304451	0.810529	-0.63665	nan	-0.882801	0.968978	0.678159	0.77035	0.62615	-0.271473	-0.00389355
206	0.624695	0.376226	0.82518	0.718944	0	0.944073	0.97894	-0.265748	0.493398	-0.503814	0.846672	-0.095832
207	0.714542	0.00315456	0.987959	0.242536	-1	-0.736617	-0.57864	0.979358	0.316228	0.90352	-0.96978	0.656437
208	0.325919	0.479954	0.981598	0.97855	1	-0.472631	-0.0505191	0.910503	-0.586939	-0.00257731	-0.00751858	0.270965
209	-0.142744	-0.0138875	-0.517028	0.0325031	0	-0.320807	0.860411	-0.756713	0.906689	-0.202897	0.407141	0.88679
210	0.942783	0.424764	0.405198	0.92494	0	0.100931	0.476202	0.183366	-0.757797	-0.238178	0.0770192	-0.864206
211	0.999532	0.980272	0.141856	-0.5547	0	-0.187191	0.746347	-0.338796	0.106635	-0.0777302	-0.18908	0.168717
212	0.0829311	0.611105	-0.20771	-0.0988917	nan	-0.250793	0.130052	-0.963476	-0.99355	0.891357	-0.470993	0.849912
213	0.845987	-0.0422159	0.147311	0.975964	0	0.356379	0.959944	0.544796	0	-0.834387	0.940086	-0.0934113
214	-0.953788	0.956451	0.71824	-0.712897	0	-0.697219	-0.300153	0.00807728	0.645013	-0.762509	-0.38969	-0.306277
215	0.726321	0.292158	0.182772	-0.196452	0	0.413025	0.987752	0.834881	0.336022	0.772726	-0.750238	0.887621
216	0.511654	0.993804	-0.339195	0.853901	0	-0.210024	-0.996775	-0.896838	0.762413	0.616783	0.984774	-0.33458
217	-0.982613	0.652881	0.737901	-0.44174	-1	0.24523	0.496139	-0.636416	-0.880579	0.330863	-0.774064	-0.840964
218	0.902134	-0.933346	-0.632628	0.914789	nan	0.0403341	-0.343841	0.318548	0.798427	-0.945166	-0.900176	0.290614
219	0.769562	0.543524	0.103606	-0.749497	nan	-0.788123	-0.31671	0.99961	0.21157	0.0578738	0.976722	0.12248
220	-0.505768	0.744897	-0.304177	-0.314378	nan	0.917818	0.910526	-0.304941	-0.469299	0.0381887	-0.0538302	0.624695
221	0.882154	0.197445	-0.810679	0.824449	0.707107	-0.307933	-0.319784	-0.559034	0.0378516	0.487407	0.773365	-0.632553
222	0.438805	0.979512	-0.989197	-0.988799	0.707107	-0.629276	-0.0281139	0.56	-0.352832	-0.275742	-0.420075	0.924996
223	-0.838908	-0.985782	-0.633598	-0.754082	-1	-0.218698	0.79378	0.964669	0.958368	0.562731	0.757853	-0.832137
224	0.999248	0.615864	-0.333833	0.50328	-1	0.732486	-0.89252	0.46332	-0.447214	0.432107	-0.984575	0.871533
225	-0.360994	-0.383629	-0.380013	-0.488032	0.707107	0.909835	0.686852	-0.998953	-0.98623	-0.68744	0.362639	0.908419
226	-0.190022	0.959145	-0.940354	0.687421	-1	0.630041	-0.852309	-0.726239	0.981758	0.789757	0.894974	0.504502
227	0.999916	0.396911	-0.732301	0.479773	nan	0.664204	-0.470467	0.684852	-0.962808	-0.971377	-0.997112	0.197636
228	-0.260982	0.596797	-0.92442	-0.944412	0.707107	0.514496	-0.709731	-0.189227	0.341096	0.997308	0.850682	-0.107858
229	-0.0892081	0.793051	-0.994365	0.983378	-0.707107	0.628826	0.515338	0.999667	-0.599104	-0.975707	-0.0680239	-0.288185
230	0.576289	-0.152057	-0.751668	-0.93411	1	0.949651	0.171446	0.180328	-0.633601	0.836877	-0.819232	-0.183975
231	-0.268241	0.188465	0.993412	-0.377297	-1	-0.110093	-0.480746	-0.962472	0.881764	-0.440132	0.999635	0.982658
232	-0.110208	0.369988	0.385716	0.631673	1	0.770662	0.813194	0.906933	-0.998716	-0.243854	-0.593801	-0.519689
233	0.877798	0.555378	-0.0199164	0.945136	0	0.744089	0.608819	-0.933733	-0.419778	0.849331	-0.691223	0.0681612
234	0.771068	0.730985	-0.0912483	-0.996372	-1	0.222495	-0.630982	0.886678	0.140873	-0.872804	0.918522	0.826848
235	-0.654488	0.833193	0.60933	-0.807687	nan	0.993277	0.0560418	-0.363004	-0.870713	0.611271	0.961335	-0.297384
236	0.952555	-0.600326	-0.913707	0.960807	0.707107	0.842596	0.252818	-0.636017	0.259579	0.216123	0.038154	-0.100139
237	-0.994575	0.232447	0.454218	-0.950453	nan	0.917556	0.880842	0.988962	-0.94335	-0.169036	-0.928222	0.428931
238	0.673878	-0.124449	-0.0211717	0.997823	-0.707107	0.968935	-0.948683	-0.579588	0.548592	0.638755	0.734803	-0.52051
239	0.851817	0.604519	0.902074	0.00896825	1	0.887458	0.185043	0.163452	0.718744	-0.219645	-0.268354	0.0906596
240	-0.189126	0.997096	0.295953	0.650341	nan	0.436406	0.117993	0.955348	-0.747409	-0.288515	0.930743	0.72071
241	-0.414811	0.996921	0.951302	-0.880824	0	0.443881	0.947874	0.687137	0.482861	0.999997	0.722114	-0.990363
242	-0.998724	0.980088	0.390699	0.13675	nan	0.973057	0.944918	-0.836314	0.672828	0.24869	-0.693883	0.183004
243	0.978234	0.932139	-0.28504	0.752364	nan	0.987877	0.30978	0.0441468	-0.45263	0.0233399	-0.333617	-0.422128
244	-0.388057	0.999271	0.380222	-0.723429	nan	0.774088	-0.538209	0.991846	0.401768	-0.309818	0.885567	0.948958
245	0.539122	-0.0928691	-0.194513	0.999766	0	0.191798	0.402914	-0.587198	0.718049	-0.248593	-0.259891	-0.241394
246	-0.415574	0.679408	0.821869	0.803611	nan	-0.265723	-0.469119	0.887971	0.811257	0.271555	0.773841	-0.209138
247	-0.188611	0.0784972	-0.648858	-0.680808	nan	-0.960728	-0.420079	0.637932	-0.974965	-0.999484	-0.709263	0.662663
248	0.414093	0.926713	0.36032	0.697234	0	0.688527	0.996365	-0.661031	-0.331574	0.648587	0.689314	-0.604277
249	-0.00906992	0.91291	-0.0487226	0.988391	nan	-0.406138	-0.935791	0.338891	0.256295	-0.0233996	0.792025	-0.0842658
250	-0.237203	0.934052	0.658993	-0.783827	nan	0.412789	0.65949	0.239019	-0.582302	0.0928803	0.961701	-0.88762
251	0.666518	-0.349906	-0.336092	0.826426	nan	0.698138	-0.060132	0.994261	0.251219	-0.109089	-0.997763	0.934036
252	0.967966	0.928888	0.864292	-0.387763	nan	0.918652	0.925088	0.104972	-0.950135	0.333318	0.248746	-0.236608
253	-0.227065	-0.568952	-0.795704	-0.407239	nan	-0.375599	0.685209	-0.0508894	-0.00472436	-0.988162	0.223144	-0.879504
254	0.375137	0.946882	0.900087	0.446303	nan	-0.629198	0.201653	0.21434	0.695328	-0.553732	0.869696	0.51431
255	-0.90468	0.765438	0.662092	-0.589873	0	0.0536859	0.1883	-0.175324	0.934998	0.105628	0.0490636	0.740314
256	0.910366	-0.87432	-0.601092	0.536514	-0.707107	0.370609	0.762785	0.789595	-0.336219	0.51174	0.996375	-0.917767
257	-0.270504	0.935261	0.95482	0.995126	0.707107	-0.129825	-0.568702	0.328177	-0.880471	0.996201	-0.998969	0.94076
258	0.990455	-0.756674	-0.750411	0.677833	0	0.0156231	0.601199	0.0656091	0.101173	-0.340305	0.999806	-0.769393
259	0.0951344	0.870668	0.987729	0.988835	1	0.699259	0.726504	-0.594524	-0.627082	-0.957826	-0.566357	0.288082
260	0.548328	0.78052	0.593438	0.377297	-1	-0.83269	-0.665813	0.748762	0.815553	-0.996546	0.233439	0.156112
261	-0.728082	-0.255893	0.210602	-0.968955	1	0.929007	0.984632	0.918688	0.804433	-0.0672958	-0.0961048	-0.992174
262	-0.262969	0.87939	0.860392	0.979383	-0.707107	0.840478	-0.0403983	-0.114006	-0.794476	0.466409	0.847998	0.617079
263	0.156338	0.829339	0.981032	0.629943	0.894427	-0.497217	0.105026	0.856705	-0.431328	0.323506	-0.805848	-0.769289
264	0.0253312	-0.722529	0.101403	-0.618133	-1	0.766285	0.62509	0.0185612	0.389517	0.0719778	0.992994	-0.559979
265	0.882895	0.0903346	-0.39418	0.880137	nan	-0.415292	-0.409939	-0.0388722	-0.168115	-0.649077	-0.977129	0.0113278
266	0.752729	0.196116	-0.508432	-0.656266	nan	0.948466	0.19087	0.840039	-0.12646	0.364226	-0.926999	0.114659
267	-0.981351	0.391793	-0.962114	0.842876	nan	-0.557915	-0.640796	0.895215	-0.181946	-0.443294	0.739862	0.994457
268	0.252622	0.985648	0.76499	0.998158	0	0.78777	0.999717	0.14862	-0.24869	0.536993	-0.976548	-0.935404
269	-0.39234	-0.976468	-0.673114	-0.554406	1	0.971559	0.763386	0.651864	-0.797601	0.567071	-0.0848942	0.624221
270	-0.0699219	0.876865	0.340471	0.867477	-1	-0.684268	-0.577493	-0.786451	-0.0201301	-0.121403	0.381549	-0.99112
271	-0.0525271	0.249154	-0.474933	-0.51231	-0.707107	-0.0306761	-0.908527	0.237771	0.627925	-0.965722	0.871068	0.214114
272	0.636299	-0.618159	-0.309492	-0.125894	1	-0.999661	-0.223012	0.375433	0.336731	0.760687	0.958279	0.364929
273	0.645611	-0.0268103	-0.970671	0.992341	0	0.974053	0.973208	-0.357751	-0.499068	0.98853	-0.513963	0.625552
274	0.999096	0.193441	0.475569	0.139441	0	-0.774584	-0.636664	0.393331	0.691696	-0.0699639	-0.442153	0.913812
275	0.106722	0.897037	0.0933407	-0.933233	nan	0.523194	0.508822	0.986123	-0.79424	0.208591	-0.997814	0.994853
276	-0.998182	-0.996887	-0.926189	0.885671	1	-0.585081	-0.996213	-0.79655	0.919145	0.0908921	0.493013	-0.675608
277	-0.822192	0.969197	0.974391	0.868243	-0.707107	-0.382769	-0.39856	0.94946	0.989461	-0.0596588	0.0525588	0.285451
278	0.99899	0.19498	-0.574094	-0.88442	0	0.852827	0.796549	-0.768369	-0.262185	0.0723902	0.981615	-0.529999
279	0.393206	0.832387	-0.00942085	0.22344	1	0.278058	0.132675	0.995858	-0.420556	-0.448788	0.686722	0.505433
280	-0.270941	-0.77185	-0.852601	-0.983408	nan	-0.0285598	-0.896724	0.756061	-0.871984	0.871045	0.816099	-0.520295
281	0.899788	0.151458	-0.408336	0.999755	-0.707107	0.541603	-0.81224	-0.212514	0.943831	-0.871576	0.915884	-0.462139
282	-0.286526	-0.232573	-0.373869	0.20464	0.707107	0.576173	0.936011	0.28568	-0.858713	-0.0436477	0.997741	0.996347
283	-0.62022	-0.0274091	0.237837	-0.0179612	-0.316228	-0.450418	-0.751165	-0.330397	0.0732623	0.949074	0.230564	-0.992912
284	0.878347	0.90822	0.823489	-0.997699	0.707107	-0.948856	-0.166302	0.985222	0.69174	-0.809985	0.718362	-0.144719
285	-0.725744	-0.96509	-0.951278	0.999607	-0.447214	0.914643	0.889567	0.913231	-0.966112	-0.485461	0.952687	0.89899
286	0.933839	0.56921	0.81536	0.0844431	nan	0.0483306	0.526176	0.329914	0.298847	0.903294	0.708123	0.547811
287	0.328764	0.350629	-0.182677	0.195256	-0.707107	0.952176	0.755421	0.930026	0.753773	-0.99896	0.639189	0.798255
288	-0.418261	0.794466	0.97337	-0.996857	0	0.914336	0.430917	0.49498	0.637683	0.619985	0.916696	0.98557
289	0.888794	-0.349382	-0.452926	0.142358	0.707107	0.0940929	0.994008	-0.34294	0.337779	-0.374093	0.35657	-0.568854
290	-0.550103	0.987007	0.695686	-0.0517107	-0.707107	-0.0106069	-0.252907	-0.274721	0.609476	0.425903	0.785492	0.11811
291	-0.969818	0.56998	-0.98525	0.324825	nan	0.660432	0.95448	0.989305	-0.0170624	-0.8093	0.9845	0.999829
292	0.432102	-0.1819	-0.324132	0.833853	-1	0.991716	-0.989461	0.91707	0.677273	-0.407398	-0.00293254	0.325645
293	-0.377674	0.990801	0.532427	0.671307	-1	0.967772	0.672745	-0.924708	0.0512148	0.937853	0.998975	-0.789004
294	-0.803455	-0.930751	-0.030641	-0.933914	nan	0.722642	-0.984539	-0.713336	-0.156239	-0.145248	0.628722	0.670361
295	-0.793651	0.834219	-0.855761	0.60246	-1	0.982347	0.372885	0.291003	0.782579	0.909021	0.992669	-0.515409
296	0.999311	0.276871	0.0211593	-0.201912	-0.707107	0.930358	0.966535	-0.0247177	-0.376102	-0.993621	0.993788	0.0855439
297	0.99489	0.957826	0.820657	0.864603	0.447214	0.585596	0.277829	0.98085	-0.445727	0.937939	0.784825	-0.748997
298	-0.29426	0.766067	-0.990621	-0.329076	nan	0.606653	-0.201988	0.511881	0.286366	0.107073	0.956732	0.335519
299	0.449537	-0.772802	0.447966	-0.826022	1	0.985171	0.866664	-0.985159	0	-0.00555547	0.826739	0.451842
300	-0.926334	-0.00480764	0.519947	0.215587	-1	-0.0164895	-0.517346	-0.572672	0.773409	-0.358451	0.742967	-0.955559
301	0.954288	0.828458	0.901963	0.689593	nan	-0.609711	-0.892157	-0.1117	-0.678833	0.586414	0.999327	0.863034
302	-0.983614	-0.204538	0.0588918	-0.999268	nan	0.578711	-0.231384	0.129639	-0.325645	0.667837	0.856817	0.224601
303	0.982735	-0.853282	-0.0475651	0.901995	0	0.981763	0.203686	0.974334	0.844312	-0.25084	0.987498	0.526714
304	0.988363	0.977061	0.856707	-0.70366	-0.447214	0.386727	-0.135761	0.782888	0.869783	0.178061	0.988991	0.60745
305	0.764721	-0.972789	-0.734132	-0.942778	0	0.671957	0.728584	-0.101084	0.531439	0.369164	0.987199	-0.692373
306	-0.903971	0.0906961	0.694512	0.828702	0.707107	0.987901	0.347944	0.215242	0.0833679	0.997589	0.470213	0.6258
307	0.318558	0.670973	-0.988749	0.976957	nan	-0.39168	0.513963	0.42711	0.993055	-0.553084	0.983774	-0.864151
308	-0.997164	0.994547	0.930453	0.997519	0	0.281025	0.408846	-0.205254	-0.140764	-0.0434372	0.90095	0.979767
309	-0.995074	0.383303	-0.832933	0.994392	-1	-0.478667	-0.675667	0.997459	-0.968619	0.736676	0.0603295	0.216647
310	0.990114	0.800653	0.593348	0.356396	nan	0.153985	0.455031	0.78077	0.910299	0.241936	0.982295	0.0256832
311	0.79628	0.989108	0.0841893	0.849199	-0.707107	-0.999965	-0.189368	-0.217521	0.0470759	-0.547162	0.979457	0.900087
312	-0.728061	-0.917743	-0.884469	0.873568	0.707107	0.705457	0.861383	-0.295807	0.674706	0.995374	0.839679	0.470878
313	0.112032	0.937503	0.693073	0.964321	nan	0.270107	0.209892	0.788128	0.335987	-0.33035	-0.0283173	0.116228
314	-0.100457	-0.272012	-0.367864	-0.852076	nan	0.999551	0.505547	-0.360994	0.325991	0.864723	0.989432	0.843098
315	0.98884	0.261328	-0.525177	0.603591	-0.707107	0.948378	0.74857	-0.562761	-0.775824	0.41495	0.435784	0.0176295
316	-0.895109	0.999807	0.821219	0.342161	0.707107	0.3872	-0.0342759	0.888557	0.960929	0.999445	0.805177	-0.930786
317	0.98818	0.556185	-0.151589	0.676	nan	0.525493	-0.969277	0.0331571	-0.829014	0.189346	0.676271	0.604386
318	0.83465	0.988914	0.951257	0.192935	-1	0.691486	0.0766965	0.611895	0.325021	-0.242347	0.859934	0.493444
319	-0.973219	0.02902	-0.242703	-0.956532	-1	0.795329	0.819884	0.795559	-0.942498	-0.0717784	0.951979	-0.946979
320	0.950806	0.0137728	-0.584249	0.659131	-1	-0.651019	-0.935492	0.752313	-0.766052	0.487931	0.875098	-0.228048
321	-0.983745	0.960275	0.11128	-0.338926	1	0.88369	0.774624	-0.922338	-0.74157	0.837896	0.999598	-0.925169
322	0.548607	0.360279	-0.365409	-0.420461	-0.894427	0.851359	0.934275	0.450335	0.886772	0.707107	0.983485	0.939123
323	-0.657168	0.867568	0.00869532	0.367841	1	0.80788	0.721455	-0.583207	0.82466	-0.799866	0.904151	0.0633056
324	0.593752	0.740731	0.23233	-0.304453	-1	-0.941022	-0.527463	0.996191	-0.650235	0.817323	0.994847	0.91437
325	-0.944784	-0.833154	-0.37598	0.210275	-1	0.112379	-0.667016	0.711901	-0.999837	0.356588	0.751317	-0.573462
326	0.771471	0.97629	0.112834	0.769783	nan	0.854601	0.851856	0.242104	-0.847158	-0.553042	0.998071	-0.609356
327	-0.126428	0.00387594	0.074466	0.684616	0	0.830738	-0.971297	0.691324	-0.932798	0.631426	0.736566	0.974675
328	0.0145333	0.909582	-0.228968	0.270148	0	0.348734	0.111437	-0.0501042	0.68788	-0.856721	0.720158	0.694595
329	-0.974205	0.155883	-0.403838	0.644252	-1	0.174859	0.475517	0.944241	0.480995	0.993126	0.980104	0.856823
330	0.447214	0.869384	0.234714	0.0745903	0	0.197387	-0.647079	-0.599064	-1	-0.5357	0.971747	-0.942092
331	-0.962113	-0.0565893	-0.134127	0.615997	0	0.986	0.936116	-0.119241	-0.963778	-0.782571	0.994004	0.9076
332	-0.922509	0.985587	0.0391005	0.439953	0	-0.399796	-0.467973	0.981576	0.897753	0.83697	0.993432	-0.829173
333	0.730318	-0.588172	0.303703	0.302146	-1	0.37097	-0.942896	-0.0288897	-0.962071	-0.743921	0.838932	0.826132
334	0.707107	0.97926	-0.0318787	0.224958	0	0.824425	0.107581	-0.577702	0.710476	-0.319456	0.853941	-0.512511
335	-0.999934	0.406771	-0.703074	0.795603	0.707107	0.880619	0.980151	0.540481	0.54202	0.959775	0.99166	0.87615
336	0.442794	0.999018	0.366737	0.349986	-1	0.686209	0.4741	0.150033	0.940453	-0.997295	0.912088	-0.0930018
337	-0.727364	-0.616937	0.214911	0.903738	1	0.662174	0.541087	0.535195	-0.0939534	0.945043	0.979904	-0.300042
338	0.99717	0.833896	-0.241226	0.663448	-1	0.577236	-0.571648	0.415292	0.628548	-0.998481	0.995919	-0.493902
339	-0.937102	0.193287	-0.658041	0.49474	0.894427	0.929251	0.913009	-0.19151	-0.416124	-0.984382	0.955821	0.767787
340	-0.101719	0.744675	0.0841089	0.49342	-0.707107	0.323801	0.0416305	0.992524	0.621842	0.687584	0.940901	0.972579
341	-0.517803	-0.91702	-0.997687	0.523263	0	0.986303	0.764583	0.166887	0.0544645	0.570682	0.970622	0.510827
342	0.80799	0.968298	0.503813	0.386249	nan	0.687458	0.255239	-0.586212	-0.999163	0.637506	0.920491	0.838444
343	-0.92885	0.798262	-0.375484	0.395595	0	-0.130887	-0.156038	0.616937	0.739781	0.711596	0.997858	0.454997
344	0.815523	-0.521377	0.270515	0.753385	nan	0.664554	0.138196	-0.265559	0.124035	-0.32188	0.698001	0.861269
345	-0.509483	0.903565	0.836286	0.89113	0	0.885614	0.971718	0.374539	0.542296	-0.986764	0.961666	0
346	-0.8	0.938258	0.341091	0.602727	-1	-0.555437	-0.93072	0.916157	0.931243	0.939422	0.986727	0.382071
347	0.64881	0.727104	0.471194	0.645989	nan	0.190022	-0.752236	0.278472	-0.724739	0.692778	0.21295	-0.769161
348	-0.712609	-0.0354656	0.0101005	-0.533908	-1	0.761628	-0.0635079	-0.527035	0.30215	-0.953672	0.999973	-0.482049
349	0.760069	0.942395	0.825486	0.395642	nan	0.887375	0.597366	-0.960346	0.963252	-0.0600574	0.982113	0.661722
350	-0.861688	-0.833135	-0.668818	0.199309	1	0.442424	-0.616987	0.584356	-0.41444	0.269466	0.847235	-0.673237
351	0.833027	0.852544	0.172035	-0.0196041	0	-0.954293	-0.320066	0.999539	0.566693	0.723902	0.686524	0.991036
352	0.00349648	0.752204	0.157527	0.935865	-0.707107	0.562965	-0.00190114	0.442668	0.914789	-0.49656	0.968185	0.164399
353	0.929969	0.122662	0.052387	-0.602092	0	0.923851	0.741379	0.961856	0.257239	0.64673	-0.854397	-0.880903
354	-0.961026	0.16618	-0.0210038	0.700095	-0.707107	0.228413	0.00315954	0.473939	-0.967552	0.999864	0.946125	-0.0104706
355	-0.990873	-0.322264	0.0546059	-0.6981	0.707107	-0.448433	0.770555	0.553669	0.910266	-0.429651	0.940244	0.95402
356	-0.284447	-0.050769	-0.717977	0.142816	-1	-0.968214	-0.999908	-0.987255	-0.81426	-0.251175	0.633686	-0.0759703
357	-0.828057	0.950977	0.534141	-0.20285	-1	-0.586269	-0.36745	-0.998652	0.838864	-0.991895	0.664364	0.965242
358	0.790724	-0.0673887	0.0717427	-0.217027	nan	-0.802926	-0.928681	0.842079	0.930601	-0.343866	0.790394	-0.989411
359	0.245328	-0.156312	-0.32574	0.301013	0.707107	0.402705	0.807128	-0.99575	-0.208935	0.399585	0.812324	-0.758011
360	0.178025	0.995661	0.354605	-0.944158	-0.707107	-0.701908	-0.994692	0.585725	0.0391856	-0.984372	-0.969169	-0.403258
361	-0.16357	-0.983499	-0.0538252	-0.0694834	0	0.266776	-0.99173	0.798897	0.408599	-0.984835	0.810447	0.146975
362	0.048785	0.189374	-0.152351	0.826405	0	0.787322	0.694903	-0.862669	-0.905213	0.999779	0.999286	-0.0102209
363	-0.942215	-0.870132	-0.200779	-0.198991	nan	-0.137492	-0.99012	-0.579	0.912777	-0.999635	0.971732	0.443533
364	-0.295534	0.853831	0.960955	-0.828404	-1	-0.668601	-0.448126	-0.388553	-0.483077	0.652394	0.995399	-0.713259
365	0.63469	0	0.115555	-0.400489	0.707107	-0.0154043	-0.977414	0.6786	0.290273	-0.498016	0.192155	0.94665
366	-0.331088	0.162342	0.138885	-0.370672	0	-0.462199	0.907009	-0.876216	-0.0505986	0.448668	0.908471	0.656781
367	-0.92894	0.988966	-0.0504408	0.480525	-0.707107	-0.704873	-0.488351	0.0589689	-0.698396	-0.551357	0.935794	0.129465
368	-0.212798	0.909688	-0.266347	-0.217237	0.894427	-0.231169	0.421419	-0.909267	0.980513	0.913998	0.971959	-0.901229
369	0.347116	-0.951965	-0.174341	-0.127233	-0.316228	-0.966156	-0.885727	0.766464	-0.471877	-0.915487	-0.671638	0.159642
370	0.168717	-0.0389315	-0.182134	-0.403258	0	-0.560803	-0.704032	0.164804	-0.847064	0.957674	0.0322413	0.773686
371	-0.349547	-0.187263	-0.166211	0.0187858	0	0.996633	0.0615354	-0.0675537	0.928266	-0.454672	0.934907	0.992521
372	-0.115368	-0.65294	-0.792957	0.366308	-0.980581	-0.557283	-0.0110831	0.649329	0.533993	-0.99977	0.981692	-0.798888
373	0.749655	0.47049	-0.197101	0.053359	0	-0.92063	-0.375309	-0.80817	0.763691	0.693743	0.5903	-0.471943
374	-0.380081	0.460491	-0.343762	-0.0878676	1	-0.992459	-0.80293	0.550487	-0.93961	-0.470254	0.97308	0.501036
375	0.907758	-0.678714	-0.537325	0.728494	-1	-0.739312	0.802802	-0.852271	0.954927	0.00418406	-0.26629	0.757744
376	-0.995705	-0.0566829	-0.359161	-0.155349	0	-0.614489	-0.145572	0.403995	0.316228	-0.429835	0.875765	-0.497002
377	0.999996	0.968346	-0.966401	0.142639	nan	-0.628388	0.0967929	0.939216	-0.943619	0.789634	0.45759	0.49328
378	0.599666	0.29474	-0.380081	0.423784	nan	-0.577002	-0.994608	-0.779509	0.521817	-0.50945	-0.918062	-0.612824
379	-0.260564	0.31289	-0.606752	-0.634364	0	-0.700996	-0.267644	0.294241	0.207475	0.264011	0.696146	-0.316228
380	0.61582	0.137111	-0.137329	0.281059	0	-0.994126	0.930777	0.966076	-0.85013	0.952983	0.179875	-0.21475
381	-0.709612	-0.8467	-0.900799	-0.349467	-1	-0.87197	0.0907599	-0.854522	-0.59435	-0.227126	0.14394	0.999006
382	0.976612	-0.397059	-0.431199	-0.178311	-1	-0.986443	-0.690701	0.280471	0.962413	-0.66291	0.525778	-0.87388
383	-0.169688	0.872158	-0.80113	-0.903948	nan	-0.941904	0.575795	0.441768	-0.597011	0.480254	-0.611122	0.987636
384	-0.927838	0.951034	-0.785214	0.82868	0	-0.551942	0.898568	-0.92494	-0.961967	0.863082	-0.28243	0.934696
385	0.621508	0.236608	0.159308	0.128138	-0.707107	-0.435249	-0.712819	-0.143332	0.919399	0.828283	0.693928	0.984127
386	0.280899	0.593113	-0.887916	-0.338861	0	-0.99999	0.230139	-0.997338	0.988925	0.403167	-0.0488712	-0.872143
387	-0.0648351	0.862746	-0.546484	-0.498471	0.707107	-0.970524	0.189402	0.952424	-0.413423	-0.00874602	-0.280634	-0.840635
388	0.879605	0.406582	-0.672744	-0.0769249	-1	-0.997555	-0.938102	-0.456916	-0.803042	-0.89379	0.378761	0.93686
389	-0.923347	0.209892	-0.666674	-0.295649	0.707107	-0.628709	0.415518	0.949234	-0.447214	0.931108	-0.824638	0.315446
390	-0.99683	0.101173	-0.465054	-0.384145	0	-0.994754	-0.948683	-0.99998	0.816458	-0.89032	0.41989	-0.825704
391	-0.880975	0.463212	-0.647891	-0.137139	-1	-0.601744	-0.338199	-0.918112	0.958488	-0.00225225	-0.987516	0.859224
392	0.996627	0.669543	-0.824709	0.151846	0	-0.915947	-0.922919	0.974331	-0.939707	0.978791	-0.0815457	0.688092
393	-0.857863	0.833235	-0.0990678	-0.582642	0.707107	-0.482623	-0.813194	-0.776612	0.559658	-1	-0.991304	-0.88039
394	-0.301587	0.623732	-0.337839	-0.192973	-1	-0.424667	0.881869	-0.869457	-0.759852	-0.379483	0.00666652	-0.54239
395	0.980443	-0.23609	-0.773183	0.415144	0	-0.849806	-0.37882	0.753516	0.387532	0.357855	0.039271	0.139201
396	-0.695628	0.948085	0.387544	-0.1107	-1	-0.0974648	-0.0188372	-0.392565	0.207548	-0.347242	0.428432	0.997281
397	0.822776	-0.29266	-0.933378	-0.496588	-1	0.0458788	0.260909	-0.987641	0.453999	-0.0702285	-0.674345	0.104558
398	0.824838	0.8451	-0.360712	0.0814997	nan	-0.35456	0.0609103	0.370993	0.366124	-0.9923	0.806819	-0.0300616
399	-0.48305	-0.00650393	-0.0498319	-0.459143	nan	-0.594391	0.977365	0.0859196	0.700932	-0.238446	-0.56269	-0.909936
400	-0.279481	-0.490454	0.0136564	-0.0786361	-0.707107	-0.889527	-0.678494	0.137319	0.780588	-0.999983	-0.542847	0.535233
401	0.47009	0.170168	0	-0.224113	nan	-0.684065	-0.889647	-0.915703	-0.74128	-0.999997	-0.481098	0.551514
402	-0.684746	-0.215674	0.23453	-0.525092	-1	-0.935176	-0.999921	0.975716	0.746379	-0.980079	0.276307	-0.937348
403	-0.912749	-0.999537	-0.585693	-0.202848	0	-0.37405	-0.976391	0.558085	0.266669	-0.995634	-0.690075	0.711911
404	-0.892653	-0.366868	0.612801	-0.532398	-1	-0.602348	-0.609773	-0.965108	-0.213526	-0.910239	-0.963227	-0.728255
405	0.999996	-0.155827	-0.0953183	-0.162764	0	-0.46322	-0.399697	-0.946792	0.487276	-0.2812	0.995275	-0.837401
406	0.075704	-0.359883	0.0142963	-0.664241	0	-0.70649	-0.625305	0.728013	-0.409056	-0.992188	0.707107	-0.226089
407	-0.769068	0.101676	0.655065	-0.633686	-0.447214	-0.999537	-0.849203	-0.175453	0.107802	-0.910772	-0.999331	-0.999903
408	0.153707	-0.606292	0.0875236	-0.519372	0	-0.780942	-0.118427	-0.667023	0.235943	-0.186587	0.953821	-0.938825
409	-0.999999	0.0621885	0.207886	-0.120671	-1	-0.579271	-0.811272	-0.308357	0.494302	-0.559776	-0.997334	0.325826
410	0.915268	-0.649676	0.240896	-0.386599	nan	-0.441761	-0.462361	-0.0703813	0.895893	-0.999893	-0.895175	-0.858749
411	-0.99905	-0.857493	0.394644	-0.205749	0	-0.998962	-0.447821	0.731864	-0.842271	-0.362736	-0.998319	-0.967567
412	0.0596545	-0.976913	0.146148	-0.827664	-1	-0.500135	-0.689524	-0.772941	0.595001	-0.999698	-0.943858	-0.742103
413	0	-0.499005	0.523752	0.0273649	nan	-0.931514	-0.878839	0.62957	-0.229713	0.225448	-0.965648	-0.973763
414	0.645352	-0.941849	-0.118041	-0.274016	-1	-0.544271	-0.473875	0.997426	0.703154	-0.406696	-0.999724	-0.648466
415	-0.991703	-0.758599	0.186572	0.791457	-0.707107	-0.569274	-0.403735	-0.980581	-0.598634	-0.979189	-0.99755	-0.57133
416	0.743432	-0.937462	0.160989	0.0741076	0	-0.814104	-0.949431	-0.124035	0.861408	-0.76733	-0.761479	-0.943575
417	-0.753815	-0.708504	-0.420812	-0.135113	-0.707107	-0.946369	-0.0553474	-0.925848	0.398612	-0.125252	-0.9651	-0.875788
418	0.995545	-0.25899	-0.257957	-0.0493451	nan	-0.70897	-0.60114	0.627861	-0.848542	-0.0711105	-0.970229	-0.959492
419	0.904636	0.488468	0.854262	-0.147418	-1	-0.641969	-0.6574	-0.173518	0.373674	-0.978305	-0.779423	-0.790325
420	0.100985	-0.997696	-0.782352	-0.0810086	-1	-0.845708	-0.603668	-0.966689	0.0564929	0.736108	-0.2209	-0.985419
421	0.971652	-0.546824	-0.416298	0.244704	0	-0.965429	-0.918747	-0.523418	0.344686	-0.834381	-0.952723	-0.931931
422	-0.993814	-0.753357	-0.386788	0.942034	-0.707107	-0.886091	-0.994869	0.54544	-0.736592	0.155097	0.0273122	-0.406801
423	0.268486	-0.885934	-0.158609	0.550411	-1	-0.117671	-0.652709	-0.980187	-0.62658	-0.509573	-0.458232	0.0121519
424	0.809685	-0.910121	-0.658784	0.465488	-1	-0.627788	-0.366883	-0.199569	-0.993151	-0.869519	-0.998665	-0.618504
425	0.998975	-0.109843	-0.0325606	0.814304	-1	-0.734059	-0.710858	0.319025	0.405501	-0.995479	-0.136381	-0.909145
426	0.550672	-0.94543	-0.34483	0.28516	-1	-0.350086	-0.86853	0.426038	0.637347	-0.910853	-0.998274	-0.988511
427	-0.629198	-0.730953	-0.229309	-0.222915	-1	-0.917955	-0.972999	-0.793634	-0.611003	-0.985197	-0.37077	-0.815443
428	0.188847	0.304492	-0.0627086	-0.000761614	nan	-0.919923	-0.996016	0.925755	0.902481	-0.82058	-0.999932	0.309468
429	-0.340938	-0.996209	-0.873328	0.609943	-1	-0.501271	-0.986367	-0.258387	-0.461279	-0.977286	-0.469914	-0.944253
430	0.370664	-0.886735	-0.495434	0.992387	-1	-0.513408	-0.765604	-0.918462	-0.0316107	0.123415	0.475768	0.146549
431	0.841114	-0.960925	-0.271573	0.139644	0	-0.989155	-0.999349	0.549406	-0.961331	-0.897582	-0.292003	-0.839749
432	-0.526183	-0.997252	-0.322551	0.945302	-1	-0.40236	0.161722	-0.44032	0.53235	-0.200824	0.0782576	-0.939365
433	-0.0783745	-0.90713	-0.506348	-0.435561	-0.707107	-0.897993	-0.926535	0.245005	0.129201	-0.964942	-0.965691	-0.156465
434	-0.810679	-0.348294	-0.227113	0.149702	-1	-0.706722	-0.945853	-0.760443	0.549225	-0.849414	-0.95245	-0.83233
435	0.999723	-0.0123638	-0.173306	-0.630972	-0.447214	-0.32425	-0.585627	-0.0846013	-0.33094	0.614534	-0.632644	-0.258736
436	-0.999807	-0.945557	-0.482246	-0.0331504	-1	0.0259653	-0.497175	-0.468759	-0.293154	-0.950531	-0.385806	-0.936048
437	0.980993	-0.966863	-0.485107	-0.0609666	-0.707107	-0.652611	-0.917378	0.320844	-0.703424	-0.861671	-0.422988	-0.699269
438	-0.777089	-0.644983	-0.496139	-0.0525588	-0.707107	-0.195277	-0.720238	-0.190435	0.054521	-0.788527	-0.932081	-0.882598
439	0.809838	-0.979842	-0.624044	-0.215389	-0.707107	-0.459663	-0.574376	-0.953471	-0.312589	-0.997476	-0.626366	-0.867842
440	0.666109	-0.978008	-0.465784	-0.0708389	-1	-0.657146	-0.664599	0.381584	-0.91046	-0.996038	-0.995748	-0.978143
441	-0.0875414	-0.657052	-0.204931	-0.728492	0	-0.77166	-0.702725	-0.650907	0.711554	0.993089	-0.424337	-0.80884
442	0.541156	-0.572915	-0.618317	-0.534214	-0.707107	-0.926582	-0.972092	-0.578056	-0.762976	-0.304659	-0.0375674	0.866315
443	-0.808736	-0.943299	-0.373837	-0.495593	-1	-0.744826	-0.720955	-0.620512	-0.814605	-0.93185	-0.987007	-0.475409
444	0.99993	-0.844481	-0.222138	-0.307444	-1	-0.358706	-0.988482	0.911456	-0.669889	0.570269	-0.959811	-0.912674
445	0.227296	-0.395996	-0.19906	-0.999909	0	-0.500917	-0.639287	-0.265362	-0.973205	0.161655	-0.529999	-0.739382
446	-0.957991	-0.833592	-0.0129936	-0.0811974	-0.447214	0.306799	-0.995701	-0.97743	-0.804125	-0.197232	-0.948683	-0.980384
447	-0.116015	-0.992773	-0.452923	-0.710437	nan	-0.833625	-0.918477	-0.335919	-0.539884	-0.738268	-0.435226	-0.474435
448	0.476283	0.78478	-0.178536	-0.245406	nan	0.967639	0.411821	0.220298	-0.961646	-0.0897997	-0.986828	-0.847736
449	-0.613159	-0.916088	-0.640331	-0.721782	-1	0.312708	-0.433697	-0.0182618	-0.313289	-0.727338	0.340334	-0.917783
450	0.432237	0.60173	-0.400276	-0.682884	0	0.0519743	-0.758518	-0.610587	-0.336336	-0.687785	-0.964205	-0.99816
451	-0.639819	-0.823543	-0.74536	0.659766	0	0.152057	-0.859026	-0.958661	-0.819072	0.186444	-0.91266	0.302677
452	0.0920292	-0.955073	-0.277764	-0.497188	nan	-0.997258	-0.755488	0.821496	0.471529	-0.828421	0.67919	-0.942793
453	0.890015	-0.910447	-0.420163	0.675387	-1	-0.997736	-0.997696	-0.914273	0.334164	0.0803842	0.0223825	-0.808018
454	-0.928588	-0.890762	-0.711872	-0.31129	0	0.312344	-0.0704215	0.830002	-0.949159	-0.968994	-0.981597	-0.707107
455	0.101408	-0.999875	-0.688411	-0.235805	nan	-0.00451803	-0.732426	-0.541764	-0.407283	-0.294369	0.961056	-0.943491
456	-0.8421	-0.9475	-0.446449	-0.962064	0	-0.420906	-0.934	0.0754149	-0.176149	0.897764	0.947055	-0.623623
457	-0.358798	-0.995687	-0.41545	-0.995396	0	0.240514	-0.364779	-0.943832	-0.506632	-0.994081	-0.990698	-0.999293
458	0.44439	-0.852011	-0.76926	-0.996541	-0.707107	0.403673	-0.505496	0.79905	0.159561	0.999019	-0.996576	-0.501321
459	0.119069	-0.989685	-0.559794	-0.480718	nan	-0.472952	0.926778	-0.688959	-0.774709	-0.766303	0.728584	-0.937478
460	0.225116	0.330177	-0.759454	-0.997562	0	0.0127067	0.20839	-0.638241	0.0405073	0.076372	0.868877	-0.929807
461	0.263778	-0.948154	-0.997813	-0.542931	0	-0.616943	-0.843241	-0.670463	-0.629404	0.338172	0.99535	-0.999997
462	-0.4467	0.558993	0.170787	-0.999873	0	-0.986453	-0.996689	-0.22236	0.914547	-0.404999	0.142784	-0.735931
463	0.76092	-0.999959	-0.974363	-0.780611	0	-0.56998	0.916157	0.98721	0.0505681	-0.416942	-0.999816	-0.77403
464	0.655721	-0.963532	-0.942939	-0.935704	0	-0.955528	-0.526048	-0.94299	0.803201	0.976097	-0.998074	-0.0466418
465	-0.676354	-0.504241	-0.645598	-0.7661	nan	-0.859869	-0.670715	-0.601749	0.268729	-0.550015	-0.481919	-0.956164
466	0.742823	-0.695421	-0.249217	-0.903963	1	-0.0655424	0.203507	-0.989226	-0.784365	-0.473199	0.95051	-0.999056
467	-0.696905	-0.855661	-0.560625	-0.895654	-0.707107	-0.999978	-0.997386	0.158219	-0.568866	-0.615578	-0.297487	-0.589449
468	0.9946	-0.86643	-0.987371	-0.335325	0	-0.745754	-0.816568	0.733717	-0.0280502	0.33027	0.359678	-0.952424
469	-0.65147	0.0185153	-0.0493747	-0.978144	nan	-0.763675	0.546149	0.280414	-0.899531	-0.957745	-0.984003	-0.966405
470	-0.155513	-0.775609	0.0109482	-0.914946	0	-0.295684	-0.999406	-0.919089	-0.739176	-0.0148833	0.997472	-0.527763
471	0.998986	-0.159076	-0.61682	-0.756972	0	-0.803349	-0.81404	-0.332738	-0.666234	0.0461048	-0.987503	-0.924481
472	0.539388	-0.871837	0.181764	-0.663131	0	-0.713116	-0.520258	-0.747409	0.122505	-0.509539	0.0461048	-0.721177
473	-0.932219	-0.988868	-0.0596545	-0.556876	0	-0.569098	-0.976959	-0.135113	-0.966717	0.997833	0.485164	0.378712
474	-0.325169	-0.629879	-0.250432	-0.969826	nan	0.0969828	-0.305975	-0.371391	-0.956767	-0.338399	0.779509	-0.575539
475	0.946566	-0.688749	-0.438583	0.948683	-1	-0.966581	-0.981655	-0.622794	-0.723669	-0.756863	0.476103	-0.61587
476	-0.912685	-0.757559	-0.110105	-0.989262	nan	-0.94154	-0.694772	-0.522655	-0.129911	-0.202897	0.133833	-0.490803
477	0.910655	0.0866296	-0.140175	0.311641	-1	-0.0729756	-0.409416	0.076372	-0.28226	-0.956965	0.997901	-0.625185
478	-0.854881	-0.962241	-0.878632	-0.996115	-0.707107	0.250694	-0.0896035	-0.723405	-0.0333148	0.643452	0.901472	-0.973774
479	-0.558853	-0.561412	0.388316	-0.727224	-1	-0.958739	-0.825039	-0.994192	-0.175927	0.890012	0.952064	-0.59063
480	0.169528	-0.230607	-0.95448	0.279924	0	-0.997364	-0.284051	-0.973816	-0.868392	-0.494556	-0.514496	-0.98503
481	0.220907	0.197794	0.300905	-0.97514	0	-0.979912	-0.528408	-0.99345	-0.421331	-0.127603	0.739009	-0.379933
482	-0.196116	-0.887165	-0.777386	0.651003	nan	-0.526059	-0.96386	0.410199	0.672881	0.389174	0.982776	-0.986893
483	-0.513502	-0.254941	-0.0373784	-0.756743	-0.707107	-0.953652	-0.902877	-0.730497	-0.236231	-0.921635	0.981044	0.51561
484	-0.242536	-0.857493	0.0381402	-0.738625	0.707107	-0.948107	-0.788276	-0.518302	-0.356562	-0.60849	0.891385	-0.996576
485	-0.876542	-0.608389	-0.440425	-0.933095	-0.894427	-0.985224	-0.581358	-0.737013	-0.712567	-0.189649	0.918236	-0.831612
486	-0.639732	0.383104	0.758969	-0.0794187	0	-0.922576	-0.856702	-0.20239	0.292632	0.576683	0.990621	-0.717318
487	-0.807373	-0.460946	0.838961	-0.80192	-0.894427	-0.696693	0.174047	-0.992088	-0.997304	0.841178	0.755649	-0.977063
488	0.88484	-0.983108	-0.273713	0.430679	0.707107	-0.952029	-0.54313	0.558748	0.0743586	0.894899	0.983066	-0.997684
489	-0.454651	-0.361944	0.91146	-0.952825	0	-0.824429	-0.828776	-0.559948	-0.882818	-0.769634	-0.938748	-0.594058
490	-0.0173384	-0.833266	-0.514496	-0.899359	0	-0.855827	-0.391294	-0.822897	-0.337958	0.440656	0.730121	-0.999982
491	0.675158	-0.241099	0.233056	-0.31822	-1	-0.771037	-0.591833	-0.765622	-0.0761144	-0.999858	0.736893	-0.594701
492	-0.161714	-0.227663	0.615658	-0.946389	0	-0.819744	-0.795585	-0.629051	0.924288	0.759685	0.966553	-0.99707
493	-0.763847	-0.260944	-0.983967	-0.109078	1	-0.50519	-0.565842	-0.808356	0.402077	-0.885505	0.999994	-0.950552
494	0.460919	-0.531768	-0.796573	-0.875486	-0.707107	-0.97622	-0.84135	-0.694333	-0.296336	0.968392	0.484023	-0.999838
495	0.821496	-0.999317	-0.97739	-0.932381	-1	-0.992378	-0.313825	0.254304	-0.481534	-0.168496	0.659776	-0.937942
496	-0.765397	-0.923837	-0.765226	0.505719	0	-0.99982	-0.560363	-0.997029	-0.556508	-0.551736	-0.667863	-0.550487
497	-0.150191	-0.210094	-0.980007	-0.977176	0.707107	-0.700956	0.577319	-0.956352	0.490844	-0.936842	0.813535	-0.916326
498	-0.00409274	-0.552513	-0.426992	0.00977607	-0.447214	0.461106	0.91658	0.510539	-0.948233	0.884062	0.459854	-0.969523
499	0.154116	-0.782748	-0.29218	-0.778345	0	-0.822008	0.712297	-0.660064	-0.979715	0.625325	0.799774	-0.978586
500	-0.0541469	-0.135936	0.259184	0.68605	nan	-0.887694	-0.971095	-0.433784	-0.723145	-0.126471	0.482937	-0.969962
501	-0.718043	-0.604759	-0.142676	-0.972665	nan	-0.972507	0.998417	-0.970466	-0.0446482	-0.397167	-0.746717	-0.511805
502	-0.417198	-0.918724	-0.331346	0.252378	-1	-0.987171	-0.511112	0.893053	0.585992	-0.843661	0.355218	-0.992607
503	-0.964176	-0.90246	-0.561065	-0.75491	0	-0.869129	-0.979149	-0.879707	-0.634984	0.368133	0.98383	-0.997604
504	-0.820885	-0.549538	-0.326013	-0.999991	-0.707107	-0.505551	0.560119	-0.949062	-0.804686	-0.0483306	0.85638	-0.262601
505	0.989213	-0.999796	-0.582467	-0.99314	nan	-0.87436	-0.965797	-0.68668	0.219111	-0.110432	-0.876092	-0.939123
506	-0.654233	0.214139	-0.998812	-0.362536	0	-0.741047	0.952684	0.403889	-0.980355	-0.18695	0.630465	-0.990751
507	-0.547561	-0.955779	-0.999084	0.400424	-0.447214	-0.614712	-0.999804	-0.506549	0.181848	-0.461541	0.679852	-0.893388
508	0.156517	0.654579	-0.993139	-0.994536	0	-0.995841	-0.89756	-0.708941	-0.553652	0.862829	0.935075	0
509	0.918455	-0.0669004	-0.946503	-0.108746	0	-0.39055	0.737021	0.880471	0.17674	0.987938	0.967459	-0.980963
510	0.927042	0.126104	0.980233	-0.201121	-0.447214	-0.94214	-0.999937	0.280158	0.950421	-0.970223	-0.989552	0.374194
511	-0.92797	-0.978258	-0.999991	-0.712353	nan	-0.979125	-0.0585202	-0.651014	-0.574533	0.766835	0.70993	-0.98836
512	-0.0990368	-0.300341	-0.9531	-0.314833	-0.707107	-0.740151	-0.837061	-0.849314	0.661622	-0.733657	-0.83205	-0.913357
513	-0.433703	-0.366292	-0.824092	-0.458643	-0.447214	-0.35878	0.706697	0.766937	0.982359	0.304706	0.672673	0.163878
514	0.393072	-0.443701	0.940244	0.340044	0	-0.528605	-0.817407	0.119701	0.901924	0.285615	-0.93221	-0.823521
515	-0.538838	-0.898177	0.93118	-0.209529	nan	-0.611821	-0.125308	-0.576956	-0.647411	0.19309	0.443514	-0.912065
516	0.986596	-0.670913	0.726104	0.570955	-1	-0.749838	-0.495051	0.114688	0.260753	-0.618493	-0.463698	-0.618872
517	-0.79422	-0.142914	0.982866	-0.992793	0	0.0808159	-0.927929	-0.88441	-0.00224719	0.855389	-0.913536	0.998721
518	-0.983151	-0.397112	0.967408	0.496988	nan	-0.51249	-0.933164	0.968566	0.723632	-0.453778	0.514085	-0.066519
519	-0.755993	-0.705317	0.56755	-0.792033	0	0.416453	-0.991536	-0.99983	-0.284887	0.817558	0.557514	-0.998849
520	-0.847651	-0.974595	0.9077	0.650198	-1	0.308949	-0.161181	-0.814724	-0.818148	0.443409	0.27881	-0.0148352
521	-0.913293	-0.546242	0.265156	-0.750683	-1	0.351354	0.290551	-0.111026	-0.806217	-0.966375	-0.244277	-0.949064
522	0.897843	-0.980485	-0.1646	0.969325	nan	-0.618659	-0.986285	-0.281404	-0.565171	-0.472867	0.881945	-0.903087
523	-0.99582	-0.575903	0.690287	0.0811869	0	0.948345	0.955897	-0.994886	-0.348449	-0.956889	-0.375705	0.103893
524	0.903986	-0.960703	0.986144	-0.99761	-0.447214	0.548207	-0.707883	-0.273794	-0.343054	0.883515	0.941263	-0.606173
525	-0.985997	-0.923514	-0.418749	0.230581	0	-0.831827	-0.454907	-0.98576	0.285477	0.210532	0.226434	0.205232
526	-0.174147	-0.703601	0.759862	0.504697	0	0.485643	-0.82993	-0.992898	-0.842608	0.292117	0.497136	0.967913
527	0.955519	-0.392831	-0.654728	0.705705	-0.707107	0.533385	-0.166577	0.857728	0.655324	0.525563	0.953231	-0.802533
528	-0.870473	-0.811643	0.230054	-0.515149	nan	0.89007	0.966405	-0.924187	-0.105141	-0.913469	0.999261	0.354193
529	-0.875323	-0.957086	0.956383	0.188908	nan	-0.072809	-0.340704	-0.986888	-0.100009	0.918462	0.680605	0.114792
530	0.732625	-0.913862	0.886997	-0.616746	-1	0.22911	0.272526	0.0513085	0.21136	-0.790001	-0.355353	-0.359292
531	-0.24118	-0.371692	0.143481	-0.354625	0	-0.815843	0.53235	0.590017	0.602713	-0.654501	0.378959	0.730764
532	0.393303	-0.94496	0.996476	0.999695	0.707107	0.970143	0.960881	0.984112	-0.7985	0.241399	0.586269	-0.776433
533	0.582627	-0.882353	-0.959283	0.704621	-0.707107	-0.998772	-0.546837	-0.996108	0.139522	0.723627	0.857834	0.879519
534	-0.187819	-0.35621	-0.966742	0.246099	nan	0.33282	0.877896	0.531049	-0.523091	-0.302854	0.913935	-0.909671
535	-0.70185	-0.911922	-0.651366	0.409339	nan	0.359816	0.916157	-0.985968	-0.992974	-0.644952	0.842449	0.108824
536	-0.00735274	-0.965286	-0.884707	0.553042	0	-0.676163	-0.899657	0.258074	0.993136	-0.195052	0.27881	0.672072
537	-0.769771	-0.865116	-0.768094	0.425636	0.707107	-0.799677	-0.859778	-0.917329	0.795861	0.00706696	-0.11141	0.157558
538	-0.847935	0.246496	-0.750359	0.998181	-0.707107	-0.437789	-0.196458	0.680562	0.96971	0.292373	0.999755	0.792772
539	-0.557518	-0.725313	-0.893404	-0.25723	0.447214	-0.743143	-0.841575	-0.946164	-0.856951	0.81463	0.984183	-0.635365
540	0.375545	0.338833	-0.939351	0.753203	-0.894427	-0.654321	-0.982308	-0.306406	0.588172	0.909132	0.999893	0.895936
541	-0.961887	-0.95833	-0.950153	0.950584	0	-0.64479	0.37068	-0.964542	-0.0689266	-0.972837	0.585491	0.964485
542	-0.672957	-0.273626	-0.941146	0.468995	0	-0.905272	-0.324944	-0.887217	0.533516	-0.999621	-0.883257	-0.725287
543	-0.97817	0.131562	-0.856342	0.996045	-0.447214	-0.812772	-0.984846	0.935199	-0.724999	0.690595	0.814249	0.778268
544	-0.92553	-0.445787	-0.796335	0.686743	nan	-0.967114	-0.60173	-0.988254	0	-0.200521	0.397223	0.452395
545	-0.95738	-0.923152	-0.999212	0.0188646	0	-0.997515	0.556597	-0.139573	-0.622478	0.814791	0.954399	-0.666795
546	-0.997226	0.0984592	-0.984534	0.484193	0.707107	-0.663562	-0.667389	-0.882778	0.575062	-0.147915	-0.975133	0.919026
547	-0.817289	-0.458491	-0.958557	0.915408	-0.447214	-0.486928	-0.0835775	-0.624405	-0.958226	-0.452987	0.994086	-0.821084
548	-0.99235	-0.664801	-0.895886	0.601227	1	-0.770022	0.214717	0.267384	0.020321	-0.967133	0.998096	0.964972
549	0.112489	0.674269	-0.896667	0.788282	-0.707107	-0.603511	0.257663	-0.206326	-0.0116102	0.426028	-0.99173	-0.0491828
550	-0.990896	-0.982371	-0.917171	0.671466	0	0.15166	0.770993	-0.952176	-0.914391	-0.0829365	0.981273	-0.50002
551	-0.996491	-0.571369	-0.764871	0.780377	0	-0.0943513	0.0210234	0.695054	-1	-0.957826	0.535335	0.997617
552	-0.0426233	-0.291942	0.251462	0.871388	1	-0.229542	0.371391	-0.331993	-0.933588	-0.934005	-0.685025	-0.977128
553	-0.964158	-0.308456	0.721132	0.66002	nan	-0.84312	-0.301245	-0.633238	0.306277	0.999602	0.486408	0.998412
554	-0.576922	-0.780562	0.563701	0.758778	-0.447214	-0.981526	-0.170787	0.173432	0.990692	0.441913	0.369667	-0.907009
555	0.245374	0.465813	0.851227	0.764659	nan	-0.108958	-0.717857	0.248821	-0.989343	0.898768	-0.978305	0.248091
556	-0.899971	-0.888403	0.339037	0.988324	-0.707107	0.264061	0.989407	-0.919265	0.523574	-0.43464	0.999977	-0.962272
557	-0.798271	-0.713448	0.685075	0.765627	-0.707107	-0.835359	-0.364308	0.0990476	0.174137	-0.498588	-0.905521	0.497384
558	-0.0384331	-0.541875	0.77332	0.409549	0.707107	0.999854	0.107536	0.707107	0.84819	-0.625034	-0.105786	-0.995907
559	0.632784	-0.996777	-0.829696	-0.0579382	nan	-0.243251	-0.13132	0.274546	0.803312	0.193656	-0.496139	-0.998676
560	-0.36303	-0.906313	0.826331	0.735904	-1	-0.979889	0.355419	-0.986599	0.249965	-0.90856	-0.464365	-0.999527
561	-0.627356	0.991147	0.766615	-0.330092	-1	0.497581	-0.551514	0.996868	0.49845	0.794358	-0.999885	-0.951491
562	-0.792591	-0.930463	0.4641	-0.223565	1	0.0630144	-0.203954	0.999459	-0.0303504	1	0.920998	0.906647
563	0.338572	-0.790025	0.978525	-0.685035	nan	0.998949	0.548348	0.0386807	0.178162	-0.950406	0.857493	-0.999966
564	-0.993212	-0.707619	-0.00325202	0.973008	nan	-0.983027	0.695867	-0.99579	0.65391	0.661238	0.886267	0.198684
565	-0.538009	-0.228982	0.877147	-0.301981	nan	-0.991915	0.800828	-0.999919	0.90505	0.493825	-0.951677	-0.999606
566	-0.547755	-0.693109	0.99257	-0.144051	0.707107	0.190193	0.949788	0.857493	0.586544	-0.116841	0.613941	-0.219721
567	-0.922213	-0.995133	0.806103	-0.444411	-0.707107	-0.966885	0.084331	-0.291845	0.143158	-0.0114278	0.588593	-0.974663
568	0.0879693	-0.42855	0.934244	-0.50574	0.707107	-0.992988	0.447214	0.0614223	0.175597	-0.962398	-0.758639	-0.458742
569	-0.942338	-0.653282	-0.721167	-0.983236	-1	0.583636	0.817412	-0.0448841	0.719252	0.738485	-0.691223	-0.734365
570	-0.891857	-0.923242	-0.575304	-0.994701	1	0.905674	0.310763	-0.991813	0.958125	-0.235151	0.595977	-0.73306
571	0.956067	-0.835289	-0.831821	-0.984243	-0.707107	-0.961097	-0.818071	-0.301131	-0.909898	0.983964	0.121054	-0.859836
572	-0.876701	-0.36342	-0.996096	-0.752804	0	-0.33659	0.823064	0.995265	0.753479	-0.999957	-0.35486	-0.597162
573	-0.878207	-0.901492	-0.620147	-0.799458	1	0.286511	0.971813	-0.768058	-0.434438	-0.29694	-0.530573	-0.539969
574	-0.335674	-0.637853	-0.887312	-0.808465	-1	-0.862772	-0.997764	-0.315314	0.992235	0.372835	0.932798	-0.597595
575	-0.974613	-0.107272	-0.518051	-0.837526	1	0.780347	0.50587	-0.538389	0.959879	-0.753167	-0.454813	-0.928477
576	-0.928477	-0.757249	-0.0217678	-0.932026	nan	-0.988745	-0.301629	-0.35272	-0.341607	-0.744242	0.788316	-0.988457
577	-0.986933	-0.878359	-0.117047	-0.913668	-1	-0.248047	-0.0927968	0.0722557	0.750542	0.246007	-0.678768	-0.967365
578	0.431704	-0.692743	0.301453	-0.614658	1	0.379692	0.956082	0.723964	0.291788	0.538683	0.241184	-0.671974
579	-0.71252	-0.92692	-0.251936	-0.998989	-0.707107	-0.904632	0.0275258	-0.964661	-0.579755	-0.973862	-0.947119	-0.731894
580	-0.930645	-0.649288	0.0190048	-0.981673	nan	0.934572	0.765678	-0.765273	0.212686	0.548656	-0.110961	-0.716983
581	-0.483965	0.839493	-0.00659689	-0.958268	0	-0.312508	-0.78297	0.525287	0.62205	-0.812365	-0.77428	-0.997618
582	-0.774894	-0.911342	0.128678	0.0740232	-0.447214	-0.334834	0.677151	0.841894	-0.351123	-0.232275	0.309282	-0.985763
583	-0.767218	0.620558	-0.823179	0.429563	0.707107	-0.938559	0.21541	-0.536452	0.913231	0.99939	-0.0201979	-0.9252
584	-0.401671	-0.173785	-0.888868	-0.925624	0	0.821011	0.375397	-0.665371	0.666041	-0.0683331	-0.832914	-0.127383
585	-0.946588	-0.354586	-0.313349	0.0725732	0	-0.909407	-0.238907	-0.816416	0.54711	0.764172	0.126632	-0.677506
586	0.516269	-0.725953	-0.209953	0.129339	0.707107	0.208301	0.215384	-0.520054	-0.118251	-0.564023	-0.985914	-0.982046
587	-0.729799	-0.98387	-0.176823	0.0808159	nan	0.970263	0.877411	-0.700708	0.0438602	0.482431	0.0462468	-0.947905
588	-0.635707	0.999927	-0.80349	0.897821	-0.707107	-0.353664	-0.359428	0.879605	-0.764155	0.412035	0.428086	-0.919464
589	-0.991768	0.848679	-0.230189	-0.688749	-1	-0.884436	-0.21693	-0.92009	-0.132743	-0.84921	-0.866103	-0.990176
590	-0.160194	0.967716	0.564774	0.471234	nan	-0.988991	-0.956427	0.98985	-0.620377	0.0389315	-0.904413	-0.933002
591	-0.854286	0.969176	0.28612	-0.284171	-1	0.754977	0.998506	-0.898309	-0.103461	0.182712	-0.149429	-0.992595
592	-0.886801	-0.942195	-0.826142	-0.708463	0.707107	-0.091557	0.797345	0.940603	0.969712	-0.334805	-0.997699	-0.995477
593	-0.730657	-0.641704	-0.955681	0.617573	-1	-0.99899	-0.974872	0.985476	0.306217	-0.7961	-0.828503	-0.80389
594	-0.668045	-0.53774	-0.965149	-0.706712	1	0.0221391	0.862777	-0.463851	-0.904449	0.772034	-0.475819	-0.975495
595	-0.605192	-0.0227444	-0.964882	-0.432169	-1	-0.989276	0.936258	-0.767592	-0.0567072	0.116137	0.263815	-0.811627
596	0.00757554	-0.202267	-0.51678	-0.398299	1	0.978373	0.329811	-0.972055	-0.0176124	-0.934907	-0.99615	-0.920938
597	-0.997728	0.374021	-0.935944	-0.0938764	0	-0.998742	-0.725507	0.571294	0.993831	0.654931	-0.580387	-0.456018
598	-0.331745	-0.135446	-0.906094	-0.33137	-0.447214	0.761456	0.586922	-0.447214	-0.899896	-0.334277	-0.997294	-0.958557
599	-0.798076	0.99885	-0.857166	0.316544	nan	-0.871745	-0.947413	-0.382602	0.330986	-0.108882	-0.984897	-0.99415
600	-0.494068	-0.974713	-0.894427	-0.324114	0	0.890284	0.93774	-0.913549	-0.452182	0.809422	0.905237	-0.965527
601	-0.839613	0.896854	-0.847871	0.651767	0	-0.801474	0.997725	0.411371	0.4924	-0.90995	-0.838961	-0.979434
602	0.977234	-0.889288	-0.731594	-0.411017	-1	0.495366	0.261217	0.606964	-0.996116	0.893672	-0.974191	-0.462783
603	-0.808178	0.798014	-0.376301	0.532899	1	0.592858	0.990904	-0.999997	0.271555	-0.986692	-0.991897	-0.96537
604	-0.88317	0.512789	-0.833454	-0.644029	-0.707107	-0.907959	0.63707	0.363874	-0.00343247	0.984576	0.327111	-0.32516
605	-0.999217	0.380882	-0.740849	0.194935	nan	0.113838	0.999676	-0.335777	0.664873	-0.973478	-0.565074	-0.983661
606	0.120847	-0.286568	-0.851208	0.266852	nan	-0.970636	0.653787	0.9629	0.536464	0.5547	-0.519721	-0.968945
607	-0.708809	0.127394	-0.584339	-0.6935	0	-0.329122	0.789133	-0.992976	0.671709	0.777714	0.999641	-0.543415
608	-0.966169	-0.986813	-0.826343	0.0650791	nan	0.788966	0.197289	-0.345705	-0.927891	0.711698	-0.898014	-0.999848
609	-0.950032	0.689492	-0.582459	-0.999592	1	-0.798615	-0.882484	-0.385498	0.77578	-0.99733	-0.447214	-0.966739
610	-0.877032	0.89254	-0.585636	0.158899	-0.707107	-0.565516	0.995492	0.135199	0.123533	0.742192	-0.666947	-0.999872
611	-0.495794	0.676405	-0.813422	-0.301501	nan	-0.972402	0.549056	-0.538389	0.466251	0.96	0.0639713	-0.991532
612	-0.23102	0.996077	-0.452007	-0.273208	-0.707107	-0.0508014	-0.996154	0.802488	0.277671	-0.735764	-0.283628	-0.973681
613	-0.890333	-0.193737	-0.801055	0.137695	0	0.0781912	0.845587	-0.986394	0.181383	-0.250826	-0.774736	-0.891671
614	-0.63381	0.840874	-0.999786	-0.287348	0.707107	-0.995218	-0.740808	0.415574	-0.0908231	-0.923776	-0.986606	-0.895041
615	0.932411	-0.858208	-0.959173	0.972189	0	0.619877	0.699335	-0.955104	-0.990312	-0.19151	-0.389138	-0.980393
616	-0.980682	0.946801	-0.854897	-0.440275	-1	-0.813235	-0.686792	-0.679344	-0.84132	-0.403353	0.598258	-0.996019
617	0.991836	0.471359	-0.907609	0.934802	nan	-0.113876	0.813796	0.957622	0.814013	0.596208	-0.917556	-0.854049
618	-0.962651	0.717595	-0.713471	0.434898	nan	0.739666	0.719401	0.895373	-0.71574	-0.0715218	0.83746	-0.56181
619	-0.79633	-0.420124	-0.97172	-0.195792	-0.707107	0.120975	0.169391	-0.875176	0.317589	-0.98157	-0.969786	-0.943128
620	0.159386	-0.108727	-0.715587	-0.512552	nan	-0.339542	-0.488424	-0.333739	-0.612223	0.456018	0.995592	-0.923187
621	-0.490763	-0.86272	-0.789949	0.927951	0.707107	-0.817206	0.791837	-0.178061	-0.990118	0.351812	-0.886478	-0.999977
622	-0.246679	0.914687	-0.462612	-0.341226	0.707107	0.616533	-0.969758	0.450281	-0.0922642	-0.860292	-0.816293	-0.767885
623	-0.127314	0.566529	-0.810882	-0.0995037	0	-0.930543	0.780869	-0.853658	-0.116597	0.999976	0.32588	-0.841744
624	-0.0231777	-0.84847	-0.271993	0.0778877	-1	-0.471633	-0.980053	0.918735	0.417168	-0.557014	0.24185	-0.938904
625	0.724899	0.968779	-0.774137	-0.793606	0.707107	0.965382	0.930829	-0.651333	-0.373402	0.208323	-0.453147	-0.944651
626	-0.779938	-0.996601	-0.718542	0.945404	nan	0.393493	0.578399	-0.42358	-0.0561881	-0.654283	0.754082	-0.716917
627	0.554105	0.824097	-0.31429	-0.801933	0	0.503132	-0.438932	-0.545274	-0.928055	0.408557	-0.936656	-0.972134
628	-0.949428	-0.643977	-0.689469	0.756293	0.707107	0.319881	-0.00201612	0.954028	0.93751	0.580162	0.597011	-0.679244
629	-0.930595	-0.731451	-0.40278	-0.390314	nan	0.945636	-0.0682615	-0.998957	0.735323	-0.999882	0.357327	-0.81717
630	-0.868549	0.597492	-0.645942	0.0138875	0	0.726207	0.130702	-0.0301977	0.438634	0.0995037	-0.853556	-0.168296
631	-0.925866	-0.940808	-0.527778	0.980993	nan	0.942753	-0.474273	0.857696	0.740681	0.945614	0.419542	-0.70059
632	0.628019	0.76	-0.382195	-0.977982	nan	0.862219	0.483352	-0.743979	0.0444006	-0.919516	-0.974245	-0.83558
633	-0.937722	0.352788	-0.909513	0.952744	nan	0.400819	0.775073	0.979787	0.297479	0.993317	0.994078	0.928477
634	0.455982	-0.589789	-0.747409	-0.870925	-0.447214	0.359402	0.827105	-0.651534	-0.94066	0.0714423	-0.83878	-0.670402
635	-0.869653	0.191811	-0.677325	0.140519	nan	-0.895688	0.121319	-0.302519	0.166598	-0.442292	-0.769108	-0.690438
636	-0.908511	-0.885336	-0.193619	0.996789	1	-0.155367	-0.33245	-0.345276	0.00243111	-0.750576	0.860157	-0.195479
637	0.686279	0.308289	-0.767491	-0.998548	nan	-0.147528	0.577693	0.303142	0.328012	0.996049	-0.968664	0.16306
638	0.928743	-0.955259	-0.297045	0.737225	-1	0.263419	-0.173063	0.115044	-0.0596115	-0.989203	-0.071247	-0.88129
639	-0.731273	0.337003	-0.703043	-0.999761	0	-0.431348	-0.0951545	-0.28882	-0.921186	0.979275	-0.942162	-0.201104
640	-0.999821	0.0276711	-0.00495452	0.495318	0	0.401359	0.807316	0.938917	0.0799778	-0.690075	0.514825	0.916539
641	0.936009	0.339471	-0.136522	0.865426	1	0.949022	0.506858	0.187703	0.584305	-0.51421	0.154936	-0.503211
642	-0.998094	-0.175893	-0.451483	0.460967	1	0.187029	-0.792083	-0.955713	-0.326196	-0.260159	-0.891943	0.422885
643	-0.710419	-0.391862	-0.339477	0.295073	-0.707107	-0.581623	-0.977848	0.492336	-0.9655	0.357677	0.411246	0.168582
644	0.199816	0.593399	-0.358531	0.651093	0.447214	0.597856	0.999863	-0.99365	0.0853147	-0.822589	-0.999993	0.866622
645	-0.765121	-0.553935	-0.898666	-0.622414	-0.316228	0.746738	0.631797	-0.241756	-0.217817	0.977718	0.742461	0.384615
646	-0.482223	0.64661	0.163646	0.107734	0	-0.0486922	0.973114	0.972921	-0.808736	0.248746	0.6	0.992728
647	-0.224378	-0.0701592	-0.714669	-0.00892822	nan	0.65875	0.095349	0.246272	0.252842	0.726207	-0.343193	0.607734
648	0.00865768	0.523476	-0.288415	0.230646	0.707107	-0.385836	-0.378125	-0.305386	0.657642	-0.995575	-0.941979	0.91781
649	-0.90844	0.650791	-0.498559	-0.169427	-1	0.144852	0.252904	-0.183108	-0.121054	0.931457	-0.341321	-0.298735
650	0.274263	-0.686384	-0.433926	-0.368596	0.707107	-0.887727	0.258036	0.486809	0.654931	0.185798	0.552329	0.7832
651	-0.184073	-0.6252	0.0264308	0.502866	-0.447214	0.859251	0.923988	0.999165	-0.835813	-0.668369	-0.518144	0.995669
652	-0.940284	-0.93145	-0.998918	0.182354	0.707107	-0.30925	-0.984408	-0.890869	0.597731	0.996323	0.942771	0.823317
653	-0.0356069	0.28126	-0.731832	-0.365288	0	0.432029	0.506897	0.154843	-0.365932	-0.860419	-0.702016	-0.919145
654	0.98634	-0.0133321	-0.893634	0.936028	0	0.9078	-0.949123	-0.706616	-0.401581	-0.711507	-0.484437	0.460175
655	-0.549973	-0.876342	-0.367989	-0.251036	0	0.925761	0.427101	-0.470073	-0.396091	0.0952586	-0.0821509	0.727618
656	0.256958	-0.546368	-0.714005	0.672895	0	-0.962041	0.703207	0.917414	-0.640558	-0.222307	0.967166	0.718988
657	0.240538	0.975586	-0.189263	-0.741002	nan	0.944898	0.317862	-0.403766	-0.778859	-0.0573219	-0.961818	0.999766
658	-0.966531	-0.0588904	-0.579916	0.5862	nan	0.447214	0.929553	0.28972	0.733326	0.99928	0.754395	0.994549
659	-0.545482	-0.498975	-0.481888	0.999872	-1	0.431021	-0.692949	0.593621	-0.809492	0.538389	-0.536337	0.964478
660	0.490535	0.249041	-0.761414	-0.793952	0	-0.0230169	0.438729	-0.928268	0.744049	-0.910899	-0.209977	0.86496
661	-0.84464	0.987177	-0.94202	-0.224758	0.707107	0.341588	-0.372295	0.738559	0.865722	0.259771	0.533993	0.999842
662	-0.13956	-0.435492	-0.342738	0.0806191	-1	0.763507	-0.181947	0.432533	0.545333	-0.687446	-0.272784	0.135597
663	0.183894	-0.641113	-0.965222	-0.906765	nan	0.512234	0.347612	0.522193	-0.292867	0.900708	-0.737805	0.983087
664	-0.401661	-0.958785	-0.993741	0.587826	0.707107	-0.577817	0.179481	-0.0247858	0.96418	-0.633842	-0.585596	0.999839
665	0.265391	0.921927	-0.0233399	-0.26963	-0.447214	0.802867	0.495615	-0.597577	0.945963	0.0463212	0.717135	0.682318
666	-0.468933	-0.736215	-0.755916	0.176711	0.447214	-0.810794	-0.991228	0.334715	-0.62727	0.982675	0.480254	0.96138
667	0.208199	0.271878	-0.733556	0.619513	-1	-0.167643	0.0152074	-0.536875	-0.268922	0.183282	0.072578	0.542748
668	-0.814763	-0.863927	-0.617245	-0.946586	0.707107	0.618164	0.239742	-0.0277671	-0.525027	-0.898093	-0.442467	0.978791
669	0.679604	-0.0591925	-0.528199	0.160071	0	0.143622	0.869535	0.811534	-0.825839	-0.973841	-0.332615	-0.0434372
670	-0.540123	0.28325	-0.958829	-0.333149	-0.707107	-0.960578	-0.334141	0.990001	-0.964764	0.742103	0.300027	0.225418
671	-0.951709	-0.476396	-0.961595	-0.0889028	1	0.423826	0.776981	-0.901276	0.520479	0.901002	-0.61518	0.4237
672	-0.278592	0.391783	-0.89272	0.34957	-0.707107	-0.0412706	0.830778	-0.488603	-0.618535	0.895468	-0.888271	0.955352
673	-0.388837	-0.325667	-0.596383	-0.52328	0.447214	-0.810802	-0.941062	0.37552	0.134416	-0.999133	0.822192	0.999572
674	0.0153828	-0.289005	-0.88966	-0.999993	nan	0.994696	0.304776	0.6765	0.618595	-0.999512	0.414779	0.877071
675	0.462989	0.993382	-0.824755	-0.0044444	nan	-0.972639	0.202606	0.120933	-0.933505	0.417168	-0.668513	0.167958
676	-0.0529642	-0.186739	-0.93941	-0.751675	nan	-0.947271	-0.859738	-0.991061	-0.0416305	0.710188	0.990772	0.686464
677	0.753941	-0.294329	-0.968206	0.815439	-1	-0.890996	-0.204173	0.995037	0.827816	-0.978513	-0.891749	-0.126411
678	-0.108598	0.656491	-0.748588	-0.70868	0.707107	0.822465	-0.220698	-0.859573	0.689938	0.903789	0.791285	0.988716
679	-0.430432	0.30743	-0.988445	0.96631	0	0.287348	0.917969	0.869144	0.471377	-0.627067	-0.997553	0.782796
680	0.385593	0.96173	-0.965352	0.737805	nan	-0.604626	-0.998717	-0.92911	-0.153935	0.922063	0.993331	0.00790489
681	-0.721924	0.99854	-0.99842	0.33757	nan	0.999982	-0.341321	-0.611116	-0.192282	0.344156	-0.409249	-0.358979
682	-0.0789268	0.620954	-0.471839	-0.548026	0.707107	-0.992109	0.0289454	-0.492435	0.698386	0.138137	-0.176664	0.944684
683	0.416807	-0.943645	-0.691581	-0.594222	-1	0.224499	0.893684	0.340649	-0.48836	-0.578479	-0.376377	0.329193
684	-0.371391	0.0629815	-0.716499	0.0642839	nan	-0.756417	-0.0675599	0.499754	0.175837	0.877683	-0.142754	-0.96728
685	-0.604804	-0.32455	-0.998816	0.789566	0	-0.0812753	0.585681	0.968277	-0.754014	-0.772869	0.999245	0.981543
686	0.842321	0.916569	-0.995876	-0.902134	0	0.173336	-0.987341	-0.926401	0.877645	0.99843	0.20024	-0.704191
687	-0.0683331	0.125075	-0.106117	0.694426	nan	-0.925195	0.989016	0.886585	-0.602746	-0.0577071	-0.668322	-0.44439
688	0.331735	-0.560229	-0.977334	-0.544333	0	0.228541	0.959501	-0.996032	0.971418	-0.975727	-0.944955	0.99608
689	-0.899935	0.620703	-0.949926	-0.731055	0.707107	0.292563	-0.987304	0.584836	-0.113359	0.891246	-0.442488	0.341743
690	0.116519	-0.903936	-0.843315	0.999247	-0.707107	-0.776705	-0.764766	-0.99613	0.366243	0.391707	0.325385	-0.272322
691	-0.347314	-0.657841	0.0148132	-0.600645	0	-0.698484	0.400219	-0.273384	-0.97953	-0.555815	-0.156131	0.23959
692	-0.876383	-0.897133	-0.95342	0.665639	0	0.144617	0.0529559	-0.92778	1	0.808261	-0.164399	-0.597895
693	-0.458643	0.316228	-0.86165	-0.890554	0	-0.623204	0.443481	0.731679	-0.894046	-0.54337	0.770067	-0.488726
694	0.633745	-0.985074	-0.936264	-0.662167	1	-0.878986	-0.496459	0.67333	0.275551	-0.583997	-0.998302	0.996675
695	-0.124308	0.450785	-0.704738	-0.294781	0	-0.00621106	-0.97062	-0.727589	0.153685	0.971668	0.402236	-0.843114
696	-0.549097	0.815634	0.989654	-0.877096	0	-0.625185	-0.654265	0.968032	-0.583122	0.666716	0.54604	-0.935727
697	0.0843973	0.204863	-0.948466	-0.824165	0	-0.495093	0.501438	0.749473	0.999355	0.242536	0.689868	-0.363996
698	0.511454	-0.0900983	-0.279683	0.963993	0.707107	0.812817	0.710581	-0.997459	-0.709821	-0.889346	-0.927189	0.768003
699	-0.800178	-0.109249	-0.46089	-0.999999	0	0.180609	-0.100931	-0.343193	-0.589085	-0.659131	0.991421	0.513134
700	0.477513	0.517178	-0.723182	0.802921	nan	-0.24502	-0.589664	-0.0020202	0.310843	-0.797406	-0.993197	-0.613941
701	0.0971	-0.448572	-0.999575	-0.211941	0.707107	0.136525	0.292085	-0.403258	0.264235	0.940977	0.991417	-0.645293
702	-0.970997	0.110886	-0.229452	0.267886	nan	-0.167824	0.846039	-0.587512	-0.78206	-0.900814	0.267644	-0.22626
703	-0.306898	-0.999129	-0.770053	0.0938314	nan	0.0157875	-0.979134	0.972496	-0.217754	-0.236352	-0.918086	0.357825
704	-0.173014	0.647648	-0.0798833	-0.837926	0	-0.666685	-0.406016	0.702145	-0.731421	-0.434299	0.929919	-0.0875361
705	-0.323958	0.509725	-0.610284	0.036121	-0.707107	0.321114	0.778342	-0.292482	0	-0.995147	-0.973326	-0.641723
706	0.104903	0.0955304	0.743437	0.491283	0	-0.936569	0.908973	-0.770281	-0.0265531	0.176226	0.984271	0.0995037
707	-0.238788	0.806069	-0.561635	-0.788647	nan	-0.923327	-0.973158	0.996755	-0.981148	0.282583	-0.998692	-0.114353
708	-0.597491	-0.921824	-0.893694	0.970143	1	0.994325	0.998818	-0.460417	-0.837365	-0.575468	-0.406604	-0.654265
709	0.275193	0.377702	0.997725	-0.257546	0	-0.730341	-0.368272	-0.447214	-0.0993476	0.82156	0.992053	0.681643
710	-0.806214	-0.213792	-0.805213	0.99285	0	-0.625552	0.0974506	0.114704	0.531182	0.605786	0.424907	-0.812868
711	0.433689	0.410841	0.983165	-0.105552	-0.707107	-0.656399	-0.721062	0.809807	0.132164	-0.637911	-0.681296	0.973552
712	-0.360272	-0.922635	-0.937338	-0.403258	1	0.886796	0.601683	-0.693755	-0.489069	0.771639	0.887683	0.277517
713	-0.993341	-0.888478	0.906845	-0.430454	nan	0.603538	-0.206638	0.14685	0.569708	-0.995487	-0.992469	0.256213
714	-0.356868	-0.172196	-0.280167	-0.249041	0.447214	0.31177	0.370787	0.689437	-0.635542	0.994427	0.944304	-0.926178
715	-0.0184842	0.661479	0.805485	0.326498	-0.948683	-0.844145	-0.943421	-0.855789	-0.382822	0.244027	-0.907453	0.356155
716	-0.0888491	-0.236897	0.939325	0.58858	0.894427	-0.230716	0.993114	-0.211131	0.349886	-0.982431	0.284205	0.165392
717	-0.118251	0.709052	-0.974423	0.988488	-0.707107	0.358183	-0.998383	0.0938094	-0.642237	0.986678	0.271729	0.0789779
718	-0.087167	-0.122483	-0.0349437	-0.601658	0	0.983197	0.506887	-0.288907	0.309586	-0.9456	-0.699259	0.54945
719	0.0632534	0.96225	-0.273676	0.999406	nan	-0.984674	-0.895378	-0.508432	0.86187	-0.994414	-0.83442	-0.985467
720	-0.578747	0.158828	0.760982	0.568191	1	0.664473	-0.0923193	0.637908	-0.873836	0.362024	0.343714	0.908731
721	0.296586	-0.932005	-0.0739178	0.269365	-0.707107	-0.312524	0.369033	0.947681	0.259868	0.996027	0.667389	0.400255
722	-0.61811	0.791205	-0.618816	-0.116322	0	0.288598	0.448013	-0.75186	-0.959131	-0.544708	-0.332081	-0.998037
723	0.827431	0.877896	0.904326	-0.254054	1	-0.393919	-0.673452	-0.666234	0.985007	0.924136	-0.91018	0.911922
724	0.920107	-0.645273	-0.536264	0.658737	1	0.982322	0.893762	-0.997366	-0.999521	0.102089	0.187431	0.0184018
725	0.40703	-0.998614	-0.98988	0.331641	-0.707107	-0.356826	-0.963936	0.222537	-0.0766965	-0.816913	0.980113	0.300114
726	-0.922267	0.993329	0.83921	0.639762	0	-0.0855439	0.71109	0.455916	0.0735706	0.849441	-0.966451	-0.532472
727	0.134988	-0.778596	0.395829	0.872587	nan	0.978533	0.324685	0.997498	-0.956518	-0.959031	0.604597	0.880123
728	-0.47742	0.822846	0.621395	0.295217	0	-0.755946	-0.270677	-0.571064	0.224148	0.934052	0.867367	0.406461
729	0.994257	0.0599815	-0.438598	0.935146	nan	-0.965105	-0.9221	0.904217	0.029201	0.976558	0.92054	-0.852528
730	-0.727516	0.829461	0.81568	-0.618284	-0.707107	0.509914	0.235676	-0.993333	0.457007	-0.828343	-0.839751	0.302002
731	0.396168	-0.257902	0.304345	-0.535251	1	-0.546435	-0.33209	-0.814665	0.115964	0.991561	0.81387	0.518727
732	-0.459002	-0.0984773	-0.101514	0.527585	-1	0.875295	0.822342	-0.148637	0.989917	-0.93805	0.270144	-0.593365
733	-0.9562	0.222316	0.878347	0.999815	0.707107	-0.52506	-0.890851	0.948683	0.895215	0.997293	0.590424	0.450357
734	0.725152	0.610591	-0.65298	-0.0244825	nan	-0.824042	0.392345	0.317589	-0.963261	-0.997758	-0.868424	-0.43212
735	0.643192	-0.908381	0.456909	0.949358	-0.447214	-0.926467	0.426539	-0.999385	-0.598258	-0.976568	0.995893	-0.613941
736	-0.675322	0.957122	-0.952531	-0.214407	0	0.873198	0.290659	0.840552	0.963343	0.983193	0.935472	-0.00789449
737	-0.574839	-0.799749	0.276994	0.719564	0	-0.628493	-0.681162	0.97835	-0.955645	-0.817133	-0.672673	0.543358
738	0.637373	0.367357	0.921511	0.52116	0	-0.896195	-0.245123	0.999899	-0.232202	0.670136	-0.424791	-0.14047
739	-0.185618	-0.712942	-0.998606	-0.314167	nan	-0.422607	-0.96783	-0.863866	-0.903902	-0.999563	0.744872	0.445118
740	0.519741	0.987203	0.824466	-0.0752891	0.447214	-0.323361	0.62495	-0.273817	-0.829559	0.455134	0.980581	0.24823
741	-0.37214	-0.532241	0.543251	0.994753	-1	-0.66429	-0.809927	-0.076167	0.882059	-0.0396289	-0.040914	-0.888435
742	0.805314	0.999859	0.319864	-0.348925	-1	0.456421	0.967884	0.913368	0.423046	0.218422	0.99997	0.999912
743	0.880356	0.140189	-0.282062	0.843755	0.707107	-0.19151	-0.174691	-0.461425	-0.971042	0.395537	-0.221621	-0.978537
744	-0.664135	0.530429	0.5321	0.914802	0	-0.0725357	0.00925886	0.828629	-0.622092	0.721105	0.999906	0.998174
745	0.166031	-0.788527	0.131501	0.0541839	0	-0.234197	-0.112825	-0.748814	-0.833022	-0.890605	-0.320678	0.493847
746	0.147082	0.869858	-0.963634	-0.976625	0	-0.363776	-0.77093	0.186367	-0.238868	0.748883	0.417541	0.290939
747	-0.792624	-0.0159675	0.252254	0.634183	nan	-0.314133	-0.642494	-0.633957	-0.710144	-0.999909	0.368364	-0.872943
748	0.576405	0.428285	-0.0386985	-0.688749	0	0.492658	0.308755	0.651726	0.174615	0.999867	-0.0985653	0.765612
749	0.875286	0.0985471	-0.161858	0.24332	0.707107	0.693016	0.998138	0.3493	-0.488524	-0.16814	0.356473	-0.989333
750	0.765856	-0.125669	0.693734	-0.152057	0	0.140387	0	-0.451903	0.284172	0.621575	-0.876072	0.274533
751	-0.998767	0.198204	-0.643785	0.563845	nan	0.0762738	-0.0842069	0.531794	-0.251863	-0.746184	-0.980581	0.671246
752	-0.899508	-0.336764	-0.272557	-0.834257	-0.707107	-0.192625	0.43362	-0.993324	-0.120847	0.0196868	0.898171	-0.605507
753	-0.024102	0.999677	0.486934	0.915396	0	0.999406	-0.20899	0.987373	-0.609599	-0.789925	-0.971015	0.940766
754	0.99944	-0.316462	-0.102747	-0.168604	nan	0.555937	0.998098	-0.45902	0.287856	0.994618	0.257245	0.657644
755	-0.588556	0.951891	0.705813	0.998353	0	-0.291917	-0.123874	0.59408	-0.394818	-0.712525	0.690816	-0.886498
756	-0.587395	-0.596907	0.0780012	-0.579056	nan	0.409056	0.992428	-0.933512	-0.999201	-0.79633	0.962679	0.290722
757	0.188997	-0.474461	0.63311	-0.967713	1	-0.993566	-0.986145	0.489535	-0.98618	0.774443	0.597913	0.918403
758	0.744569	0.196639	-0.977941	0.834903	-0.707107	0.73343	0.463698	-0.991707	-0.997829	-0.935829	-0.963196	-0.999522
759	0.675725	-0.361917	0.00844248	-0.926887	nan	-0.0690655	0.580393	0.800442	-0.961524	-0.923742	0.905459	-0.692984
760	0.248075	-0.986965	0.333421	0.203143	0	-0.55889	-0.241292	-0.993115	-0.625193	0.998853	0.349382	0.980621
761	0.076338	0.773546	-0.491041	-0.871152	-0.447214	0.288331	-0.0397695	0.910236	0.971154	0.357647	0.999605	0.975133
762	0.423719	-0.694939	0.488953	-0.995396	1	-0.815697	0.397998	-0.85939	0.0494444	0.940191	0.388333	-0.827421
763	0.0961322	0.839367	-0.941788	-0.0635079	0.707107	-0.0681145	-0.0905357	0.724527	0.630811	-0.872281	-0.994853	-0.743921
764	0.324517	-0.982127	0.539772	-0.333088	-1	-0.274944	-0.50838	0.89174	0.565744	-0.168641	0.762197	-0.260429
765	-0.580038	0.976496	-0.795704	-0.262061	0	-0.986088	-0.630528	0.999746	-0.095073	0.998488	-0.270432	0.630348
766	0.289501	-0.999928	0.936926	0.296399	nan	0.520473	0.850672	-0.456474	0.273004	0.999964	0.989614	-0.87768
767	-0.436871	-0.179588	-0.93913	0.397494	1	0.156257	-0.46309	-0.0353625	0.98143	-0.808916	-0.945614	-0.992416
768	0.170596	0.998035	0.664266	0.331218	-1	-0.733268	0.0584533	-0.106655	0.97926	-0.560684	0.703243	-0.993851
769	0.988554	-0.80703	-0.944587	-0.497796	0	0.207383	0.359251	-0.999978	0.53894	0.330618	-0.326749	0.778538
770	-0.142961	-0.926319	0.195546	0.748016	0	-0.542054	-0.499569	0.985007	0.489298	0.913038	0.522649	0.353892
771	-0.111757	0.516205	-0.229955	0.269297	0	0.779888	0.523367	0.501424	0.887126	-0.948683	-0.931425	-0.0184726
772	-0.623322	0.945285	-0.11708	-0.183202	nan	-0.773737	-0.818333	0.98669	0.435748	-0.999882	0.943667	-0.133963
773	0.929066	-0.940984	0.554127	0.970753	0	-0.364399	0.216333	-0.363178	-0.619034	0.932032	0.305428	0.974826
774	-0.117523	0.187522	-0.176077	-0.483399	nan	0.98616	-0.121054	0.866089	-0.890906	0.993728	-0.630593	-0.0413589
775	-0.841933	0.971082	-0.852647	0.905325	nan	-0.984686	0.026872	0.142897	0.329137	-0.972864	-0.44318	0.631012
776	0.456365	-0.679042	0.818621	-0.880051	nan	-0.00571419	0.354059	0.890748	-0.181162	0.627997	0.27638	0.470706
777	0.239405	1	-0.321012	0.922686	0	0.215985	-0.0593239	-0.630539	0.491321	0.649486	0.864757	-0.420352
778	-0.308269	-0.291636	0.479511	0.52881	nan	-0.58241	0.07178	-0.810224	0.0842581	0.263976	0.921982	-0.329031
779	-0.815117	0.977199	-0.507113	-0.260101	nan	-0.424167	-0.410131	0.995014	0.255433	-0.544471	-0.98539	0.916157
780	0.999955	-0.312699	-0.942248	-0.507887	nan	-0.34005	0.114251	-0.942627	-0.192745	-0.974049	-0.444959	-0.986648
781	0.99967	0.973417	0.194472	0.0916758	-1	0.85942	0.0367968	0.328682	-0.205822	-0.516547	0.964817	0.911272
782	-0.664578	-0.487742	-0.129081	0.14496	0	-0.988653	-0.996436	-0.998603	-0.825858	-0.340946	-0.835555	-0.882121
783	-0.254172	0.960714	0.630858	0.921547	0	0.620129	-0.405706	0.744599	0.621666	-0.999717	-0.836139	0.669397
784	-0.0382952	0.16422	-0.939422	0.0805592	1	0.0858068	0.75097	0.99999	-0.787056	-0.0307022	0.509021	-0.410706
785	-0.0372743	-0.840962	0.338719	-0.407568	0	-0.549245	-0.431042	-0.999917	0.802744	-0.964564	-0.943124	0.763193
786	0.893759	-0.999084	0.541028	0.22267	nan	0.0472001	0.20601	0.205372	0.980093	0.994761	0.991695	-0.102415
787	-0.778126	0.71843	0.760374	-0.300831	0	0.360217	0.999025	-0.919145	0.970385	0.99646	-0.87362	0.284658
788	0.94431	0.999149	-0.637873	0.918935	nan	-0.463076	-0.310056	0.99788	-0.756169	-0.857316	0.968638	0.997029
789	0.959229	-0.9269	0.943252	-0.998332	1	0.647099	0.810771	-0.412385	-0.849138	0.988685	0.940136	-0.896364
790	-0.670395	0.977212	-0.752762	0.901523	nan	-0.456395	-0.622372	0.96592	-0.990797	-0.998612	-0.872943	-0.816062
791	0.8369	-0.847099	0.738068	-0.675094	-1	-0.910655	-0.446584	-0.357551	-0.643632	-0.92776	-0.72311	0.800344
792	-0.071247	0.775727	-0.99873	0.337136	0	-0.238286	-0.971119	-0.819895	-0.705133	0.999647	0.180692	-0.861934
793	-0.923461	-0.386807	0.152367	-0.995076	0	0.99821	0.536056	-0.256327	-0.336448	-0.98313	-0.805056	-0.999759
794	0.706157	0.28902	0.999658	0.532735	0	0.56202	0.695421	0.621451	-0.539615	0.723781	-0.559429	-0.948683
795	-0.989216	-0.880589	0.942428	-0.48276	0	-0.683021	-0.853212	0.949629	0.836144	-0.927179	-0.542492	0.747409
796	0.708621	-0.203746	-0.921277	0.312033	0	-0.412357	0.776834	-0.99046	-0.737805	0.994251	0.835485	-0.674158
797	-0.253647	-0.302914	0.911717	-0.989343	0	-0.459423	-0.841725	0.0423349	0.340704	-0.293795	-0.621575	-0.355905
798	0.287079	0.977494	-0.968126	0.168332	0	0.980773	0.228834	-0.356275	0.183366	0.0503946	-0.812862	0.13979
799	0.50527	0.982424	-0.444891	-0.0898675	0	-0.543429	-0.51883	-0.0721797	-0.610937	0.990787	0.606173	-0.93356
800	0.745593	0.391251	-0.662574	0.569611	-0.447214	0.719109	0.948362	0.38274	-0.836492	-0.716133	0.997245	-0.899134
801	-0.999655	-0.781833	0.938527	-0.690388	-0.707107	-0.979849	-0.485643	-0.657692	-0.783801	0.698372	-0.5614	0.583824
802	-0.401184	0.99897	-0.829012	0.174935	0.707107	-0.618872	0.377297	0.932174	-0.580822	-0.820272	0.812461	-0.798384
803	0.963127	-0.994896	0.487975	-0.906641	0	0.997557	0.786183	0.988217	0.490803	0.962002	0.270035	0.102165
804	-0.230687	0.168296	0.479524	0.0352722	0	-0.741603	-0.794695	-0.547624	-0.949132	-0.873808	-0.842633	-0.881862
805	0.312367	0.582563	-0.961816	0.738142	-0.707107	-0.687648	0.494466	-0.790363	0.0670488	-0.435999	0.200843	0.792347
806	0.436945	-0.0916562	0.918783	0.0635867	0	0.479545	0.913469	0.975232	-0.856224	-0.21693	-0.502334	-0.0550346
807	-0.310591	-0.129735	-0.78955	0.20257	1	0.826927	-0.778933	0.56231	-0.468782	0.999927	0.507568	-0.413226
808	-0.392366	-0.847287	0.943844	-0.953628	-0.707107	-0.231621	-0.197544	0.52869	-0.879768	0.0817652	-0.628947	-0.83453
809	0.158139	-0.864931	-0.767077	0.205271	0.447214	0.165724	0.416986	0.14077	-0.548317	-0.760993	-0.475843	0.955936
810	-0.261881	0.998489	-0.671118	-0.983933	nan	-0.57856	-0.720701	-0.923029	-0.601558	0.984525	-0.428086	0.576013
811	0.249775	-0.998448	-0.777199	0.100327	0	0.922774	0.83508	-0.959608	-0.493606	-0.934728	0.9236	-0.557586
812	-0.0108375	-0.346927	-0.894427	0.997294	0	-0.83269	-0.746524	-0.29869	-0.995973	0.947755	-0.578429	0.999361
813	-0.923742	0.784464	-0.406253	-0.355155	nan	-0.240025	0.56038	0.997162	-0.906183	-0.485976	0.619644	0.311186
814	-0.110122	-0.860292	0.189074	-0.992432	-0.707107	-0.356726	-0.437907	-0.708694	0.907051	-0.994216	0.167862	-0.669798
815	0.167485	0.483767	-0.0926731	-0.642735	0.707107	0.810002	0.963916	-0.744242	-0.0148132	0.999274	-0.184289	0.184289
816	0.00900864	-0.361528	-0.485509	0.370592	0	-0.951257	-0.875539	0.842765	0.83182	-0.0197981	-0.999275	0.996501
817	0.283432	-0.629471	0.71991	-0.946856	-1	-0.65362	0.222562	0.0418794	-0.543199	-0.78062	-0.643659	0.498892
818	0.143789	0.970679	-0.78103	0.0616801	1	0.37805	0.00622395	-0.955779	0.0273007	-0.985426	0.720133	-0.769346
819	0.782233	-0.990887	0.573863	0.114006	nan	-0.891533	0.425361	0.11224	-0.434453	-0.987275	-0.962964	-0.453003
820	-0.998488	0.565936	-0.879292	-0.829775	nan	0.90829	0.464549	0.924678	-0.974958	0.987062	0.252129	0.949815
821	0.578825	0.0246838	-0.645181	-0.0618498	nan	-0.929833	-0.998995	0.999933	-0.455643	0.998306	0.516493	-0.65294
822	-0.312618	-0.247644	-0.729999	0.390714	-0.707107	-0.814212	0.173958	-0.994637	0.392935	-0.932302	-0.0383199	0.527479
823	0.243597	-0.403068	-0.966884	-0.0599733	0.707107	0.171341	0.0571927	-0.082874	-0.795755	0.612867	0.125973	0.0932475
824	0.771824	0.827798	0.454661	0.110217	nan	-0.0473457	0.24388	-0.723608	-0.638846	-0.999943	-0.456748	0.549666
825	0.168392	-0.982715	-0.15423	-0.0203348	-0.707107	-0.296958	-0.274484	-0.347807	0.281803	0.984309	0.585233	-0.7601
826	0.531302	-0.432657	-0.932431	-0.383378	-0.707107	-0.985755	-0.298275	-0.790837	-0.663901	-0.921376	0.564581	0.0522424
827	-0.528446	0.999974	0.994472	0.969958	1	-0.383522	-0.933464	0.99144	0.8	0.824729	-0.990435	0.320542
828	0.481309	0.93341	-0.580725	-0.278949	-0.447214	0.998436	0.914729	-0.239835	0.296805	-0.283906	0.775672	-0.579279
829	-0.0642236	0.935615	-0.866391	0.193575	nan	-0.822842	-0.428202	-0.202959	-0.93411	-0.268799	-0.725656	-0.769034
830	-0.361074	-0.987853	0.681292	-0.48942	0	-0.455008	-0.124035	-0.83205	-0.149253	-0.186162	0.341206	0.702145
831	-0.818979	0.87247	-0.990173	0.756279	nan	-0.411219	0.997334	0.860463	-0.766671	-0.791377	0.259754	0.998148
832	0.860344	0.222347	0.938587	-0.82723	nan	-0.812538	0.926126	-0.890701	-0.799908	0.953635	-0.999892	0.97881
833	-0.995991	-0.677847	-0.996258	-0.353364	-1	-0.518711	0.00672254	-0.137837	-0.514496	0	0.971457	-0.834617
834	0.376002	-0.984776	0.746325	0.107034	0	0.0441396	-0.972387	0.416919	0.423685	0.0872319	-0.67194	0.170948
835	-0.933909	0.986765	-0.900942	0.986814	0	-0.945727	-0.5713	-0.97836	-0.944497	-0.58854	-0.701547	-0.0966026
836	0.213119	-0.0875563	-0.999923	0.857734	0	0.081525	0.459423	0.713506	-0.874953	0.886046	0.977549	-0.146084
837	-0.995634	0.989312	-0.972616	-0.853543	nan	-0.0884618	-0.97264	0.838082	-0.385538	-0.863542	-0.914918	0.803742
838	0.59054	-0.822489	0.997086	0.983748	0.707107	-0.257663	0.459707	-0.96403	-0.58142	0.999968	0.415005	0.303774
839	-0.9995	0.79922	-0.991619	-0.392457	nan	0.29213	0.176783	0.955779	-0.958492	-0.57239	-0.751165	0.214599
840	0.973778	-0.692446	0.759452	0.685746	0	-0.981091	0.414301	-0.999975	0.972453	-0.580769	-0.523852	0.997042
841	-0.967817	-0.848591	0.987758	-0.187144	-0.707107	0.00985174	0.238052	0.976218	0.22723	0.952311	0.487155	-0.638261
842	0.999993	0.94654	-0.819521	0.530593	0	0.929491	0.361178	-0.50988	0.704621	0.287348	0.989949	-0.682173
843	0.998847	-0.993039	0.9726	0.523983	0.707107	0.287249	0.606617	-0.406422	0.628632	-0.962672	0.976862	0.375484
844	0.278748	-0.985044	-0.968043	-0.630056	0	0.0120473	-0.533742	-0.757067	0.636195	0.751888	-0.970059	0.927598
845	-0.989917	0.213414	nan	-0.657692	-0.707107	-0.996979	-0.795553	-0.567925	0.999512	-0.0685082	-0.173221	-0.884412
846	0.818307	0.97908	nan	0.662385	0.707107	-0.998011	-0.544988	0.35951	-0.330743	0.92246	-0.913231	0.994916
847	0.108643	-0.816968	nan	-0.774605	-1	0.44214	0.275199	0.978036	0.188534	-0.920818	-0.232213	-0.546789
848	-0.259168	-0.934719	nan	0.556731	0	-0.897012	-0.232054	0.215991	0.247213	-0.272116	-0.99193	-0.752373
849	-0.376738	0.388057	nan	0.999999	0	0.778198	-0.655139	-0.0218926	-0.705604	0.930881	-0.206682	0.99002
850	0.867511	0.971703	nan	-0.970911	0	-0.491963	0.11228	0.608139	-0.997725	0.99579	-0.347657	0.498038
851	-0.812035	-0.646097	nan	0.58612	0	0.835471	0.629848	0.868919	-0.00754695	-0.856522	-0.962374	0.624546
852	0.637915	0.995037	nan	-0.65297	0	0.14033	0.482861	-0.951788	-0.262456	0.685313	-0.177153	0.974221
853	-0.566766	-0.768802	nan	-0.932447	nan	-0.480417	-0.373129	0.75133	-0.0265729	-0.336074	-0.538916	-0.939591
854	-0.948683	0.0100599	nan	0.900585	nan	0.971815	0.56239	-0.322823	-0.0426961	-0.774815	-0.840406	0.974323
855	0.519784	0.936698	nan	-0.105581	nan	-0.553935	-0.690747	0.477428	0.351302	0.723218	0.763386	-0.950798
856	-0.214437	-0.540421	nan	-0.540006	0	0.06103	0.989682	-0.884095	-0.97815	-0.0646791	-0.903548	-0.114073
857	-0.16922	-0.923887	nan	0.307974	0.707107	-0.962094	-0.887822	-0.0883627	0.193827	-0.774118	-0.998713	-0.819767
858	0.0948091	-0.628819	nan	-0.997724	nan	-0.275961	-0.623312	-0.51611	0.348433	0.433671	0.269988	0.998233
859	0.674142	0.979435	nan	0.761409	-1	-0.358706	-0.188021	0.953436	-0.981926	-0.98193	0.284598	0.981385
860	0.167275	-0.976566	nan	0.584921	nan	-0.0123702	-0.285709	-0.901596	0.125312	0.142876	-0.998868	-0.689655
861	0.134578	0.99999	nan	-0.865255	-0.707107	0.669438	0.935436	0.969204	-0.597346	0.554195	-0.843242	-0.956257
862	-0.2904	-0.97943	nan	-0.172934	0.707107	-0.896494	-0.779715	-0.719731	-0.856553	0.668965	-0.156537	0.827919
863	0.570367	-0.392773	nan	-0.225129	0	-0.739564	0.0906433	0.877348	-0.908167	-0.969478	-0.783974	0.956899
864	-0.613213	0.598552	nan	0.449676	nan	-0.991549	-0.507985	0.998205	-0.424639	0.940584	0.0874683	0.375349
865	0.621764	0.783892	nan	-0.540083	0	-0.588716	-0.699818	-0.993901	0.343714	-0.999338	-0.915204	-0.143629
866	-0.891997	-0.994362	nan	0.737356	nan	0.258362	0.0473242	-0.869229	0.966162	-0.0180151	0.0787025	-0.655648
867	0.912221	0.899947	nan	-0.0662962	1	-0.045771	0.365932	-0.890238	0.371948	0.66232	-1	0.094623
868	-0.771164	0.253763	nan	-0.908393	-0.707107	-0.981239	-0.994348	0.983369	0.119145	-0.717347	0.424949	0.998228
869	0.981731	-0.930033	nan	0.437924	0.707107	0.66966	0.62618	0.947299	-0.177484	-0.287887	-0.998656	0.842344
870	-0.915971	0.332928	nan	-0.128672	-0.707107	-0.345499	-0.216294	-0.79901	-0.373113	0.432226	-0.465414	-0.515204
871	0.716779	-0.632535	nan	-0.536033	nan	0.386904	-0.378212	0.993164	-0.470469	0.893799	0.0788498	-0.976187
872	0.427775	-0.38176	nan	-0.94658	0.707107	-0.573563	-0.771307	-0.983758	-0.463759	-0.970548	-0.59239	-0.319294
873	-0.0528561	0.910873	nan	0.994762	nan	0.783498	0.167992	0.921071	-0.879707	0.9705	0.818266	0.836307
874	0.184786	0.780195	nan	-0.256348	nan	0.135758	-0.24387	-0.33565	-0.817978	-0.957303	-0.940718	-0.988312
875	-0.20014	-0.996312	nan	0.49429	nan	-0.925871	-0.954462	-0.68998	-0.180834	0.790663	0.436104	0.971835
876	0.807557	0.666825	nan	-0.997497	nan	0.551113	0.974361	-0.881527	-0.976844	-0.999525	-0.829437	-0.695714
877	-0.999822	-0.891226	nan	-0.101281	0	-0.218472	-0.251829	0.97957	-0.998353	0.138011	-0.380544	-0.812675
878	0.0838921	0.712	nan	0.967771	nan	-0.397974	-0.75713	0.858341	-0.921441	0.783498	-0.976596	0.695291
879	0.675968	-0.242274	nan	-0.488871	0	-0.0439672	-0.0721675	-0.91879	-0.921167	0.969718	0.999706	-0.37199
880	-0.991492	0.895825	nan	-0.957508	1	0.164399	-0.970383	-0.351447	-0.645317	-0.921416	-0.960963	0.606388
881	-0.374789	-0.918371	nan	0.28676	0	-0.9009	0.237039	0.982423	-0.833027	-0.050146	-0.0535198	0.97231
882	-0.263284	-0.93613	nan	-0.959971	-1	0.241151	-0.869239	-0.928477	-0.463944	-0.97749	0.937803	-0.867233
883	-0.58037	0.833244	nan	0.99713	1	-0.199687	0.999474	0.196116	-0.476777	0.40029	-0.771724	0.99986
884	0.948958	-0.576411	nan	-0.278038	nan	0.28379	-0.0530326	0.69606	-0.0436175	0.581962	0.993373	-0.688426
885	-0.890986	-0.83205	nan	0.62976	0	-0.65178	-0.999728	0.971578	-0.301131	-0.102956	-0.0283574	0.996865
886	0.599676	0.360541	nan	0.168643	nan	-0.225254	-0.458532	-0.215055	-0.999858	-0.983117	0.249878	0.971098
887	-0.247159	-0.981302	nan	-0.995005	0	0.696422	0.854452	-0.588172	-0.249622	0.408734	0.145146	-0.799323
888	0.937862	0.999817	nan	0.718068	nan	-0.272377	-0.528699	-0.956919	0.985351	-0.526489	-0.00507608	0.24898
889	-0.0732328	-0.604849	nan	-0.86335	nan	0.785227	-0.273081	0.783	0.305232	-0.0431788	-0.946931	0.620542
890	-0.874853	0.98353	nan	-0.026672	nan	0.255282	-0.413095	0.450115	-0.812913	0.704785	-0.714073	-0.839262
891	0.980433	0.624127	nan	0.382411	0	-0.797461	0.409952	-0.981179	-0.554387	-0.746463	-0.923795	0.955389
892	-0.984557	-0.784032	nan	-0.908386	nan	0.285092	-0.906183	0.957612	-0.404705	0.722733	0.951223	0.935243
893	-0.677209	-0.334164	nan	0.388933	nan	-0.710388	-0.910954	-0.5189	-0.296822	0.617822	-0.653011	0.831417
894	0.608536	-0.5742	nan	0.366712	nan	-0.952549	-0.622695	-0.733002	-0.974667	-0.663592	0.588172	0.761211
895	-0.0582871	-0.697021	nan	-0.488313	nan	0.468794	0.547228	0.559799	-0.816757	-0.962113	0.402474	0.951072
896	-0.217541	0.954788	nan	0.917806	nan	0.121426	-0.187032	-0.642104	0.186769	0.747011	0.11982	-0.495305
897	0.480371	-0.878784	nan	-0.991651	nan	0.331277	-0.954899	0.955017	-0.996795	-0.808935	-0.0175412	0.998943
898	-0.00634908	nan	nan	0.972294	nan	-0.411921	-0.855298	-0.977706	-0.360041	0.730316	0.0747899	0.0805881
