# Supplementary material for: Cells use molecular working memory to navigate in changing chemoattractant fields
Source: eLife. 2022 Jun 6;11:e76825. doi: 10.7554/eLife.76825 (PMC9282860; doi:10.7554/eLife.76825)
Supplement: Supplementary file 1. — Details included also in Methods. [file elife-76825-supp1.xlsx]

## Sheet: Sheet1
	α1	α2	α2_lap	α3	β1	β2	k1	k2	g1	g2	kon	koff	Et	RGt,N2t			ε
EGFR-PTP interaction network (Figure 1B)	0.001	0.3	0.25	0.7	11	1.1	0.5	0.5	1.9	0.1	0.05	0.28	(1.1/1.26/1.35/1.85)	1	0.008	0.008	0.01
															0.02	0.02
Physical model of chemotaxis (Figure 1C)	kc	τc	τa	kprot	kret	karea	kten
	0.1	0.08	0.1	0.08	0.05	0.02	0.1
