# Supplementary figures and images for: Cells use molecular working memory to navigate in changing chemoattractant fields
Source: eLife journal article supplement (doi:10.7554/elife.76825), 2022-06-06

**A**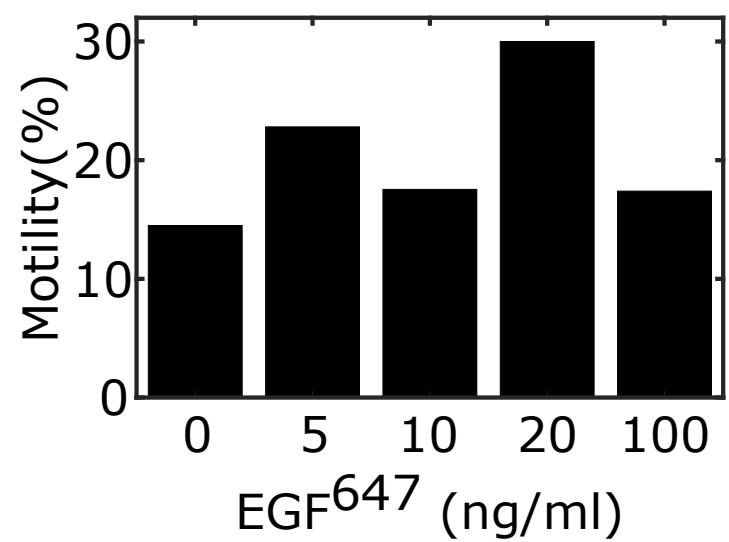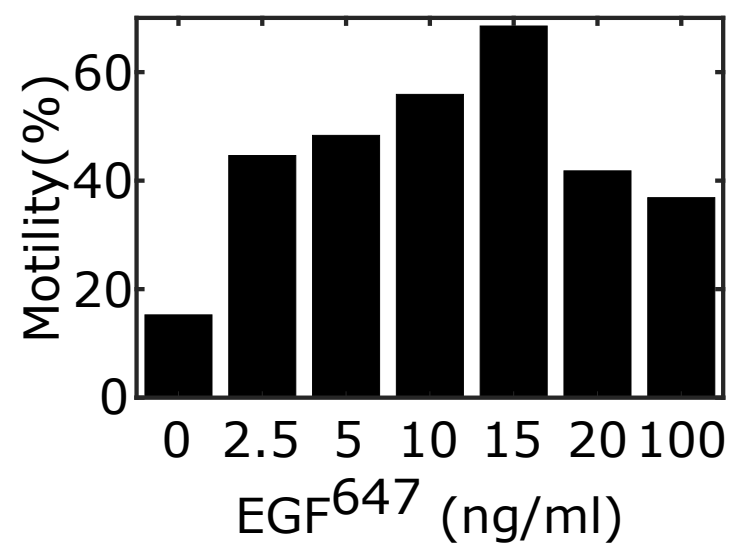**B**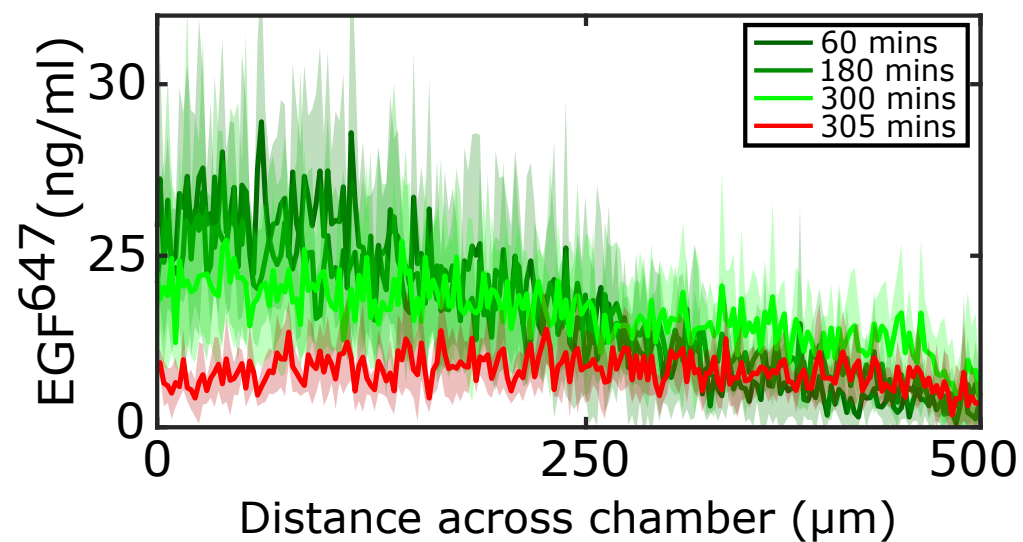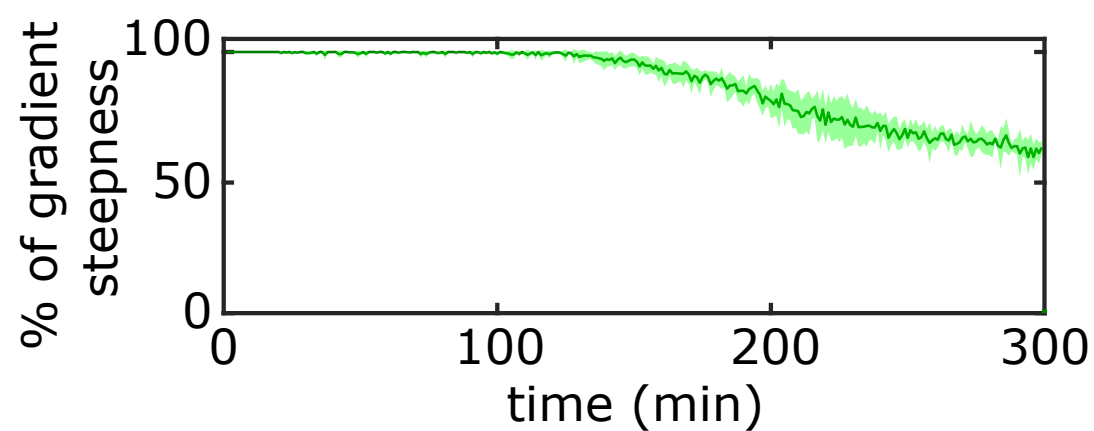**C**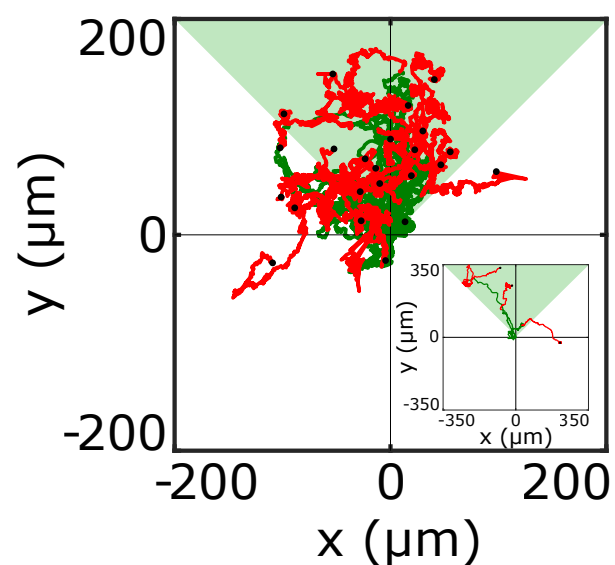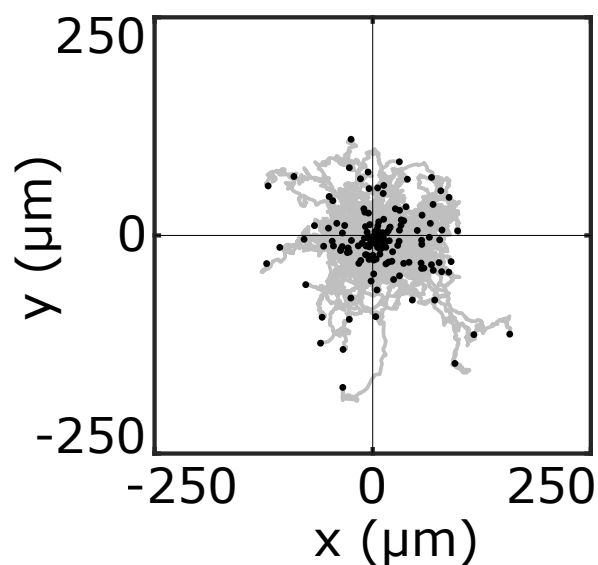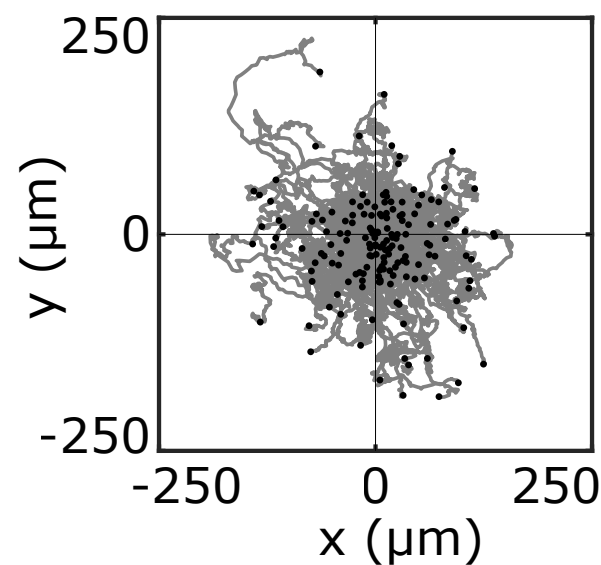**D**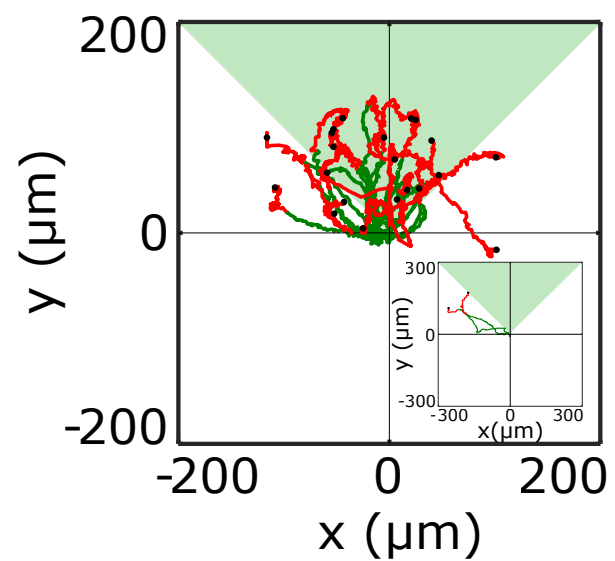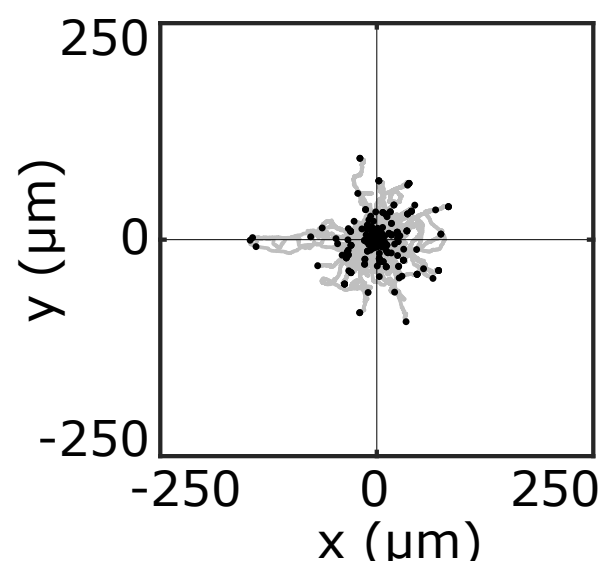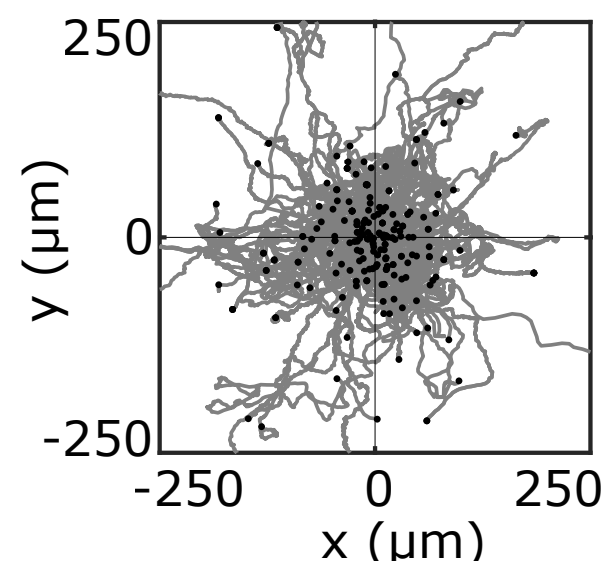

Supplement: supp [file elife-76825-supp-v1.zip]

**A**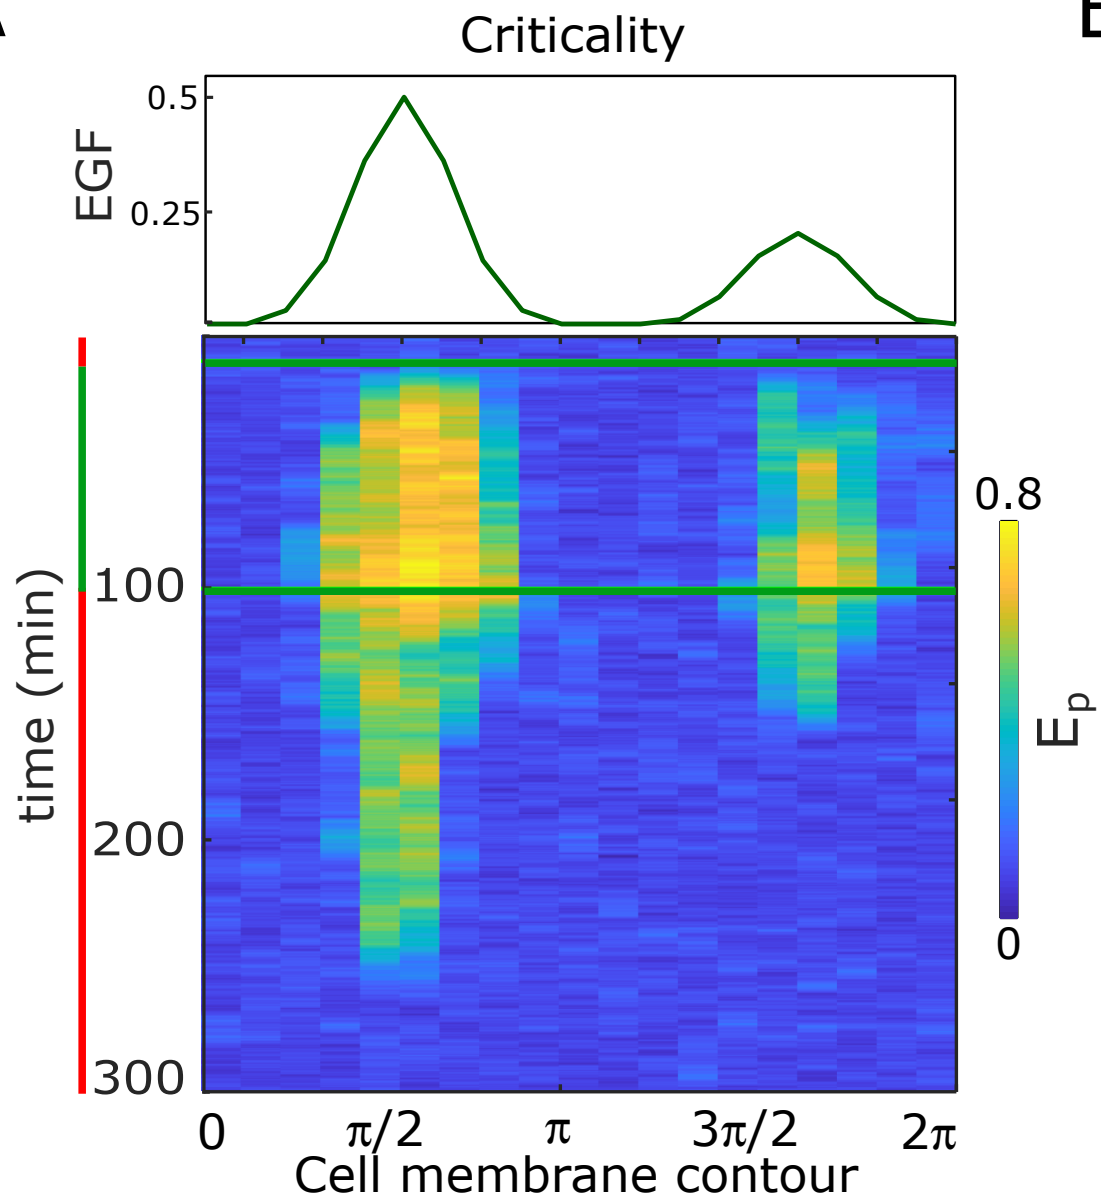**B**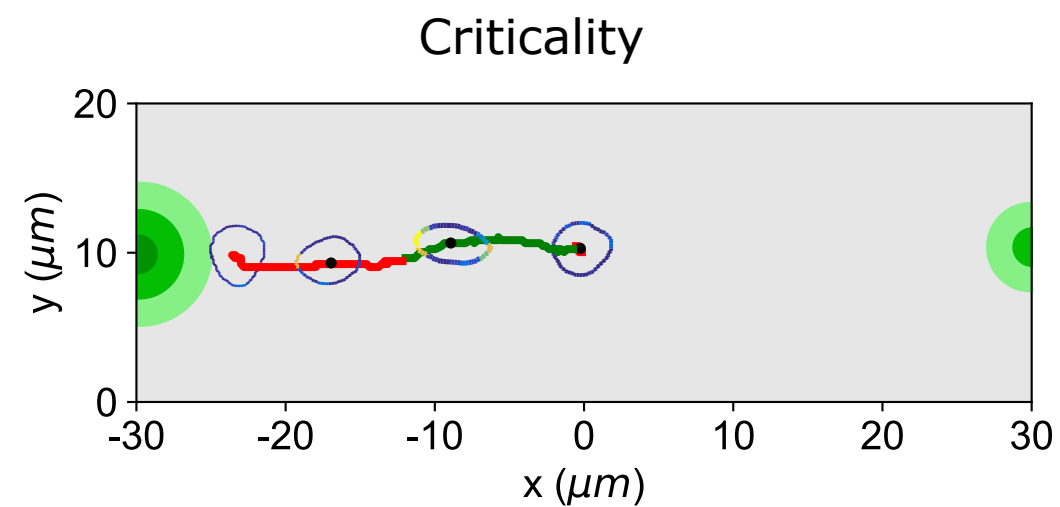**C**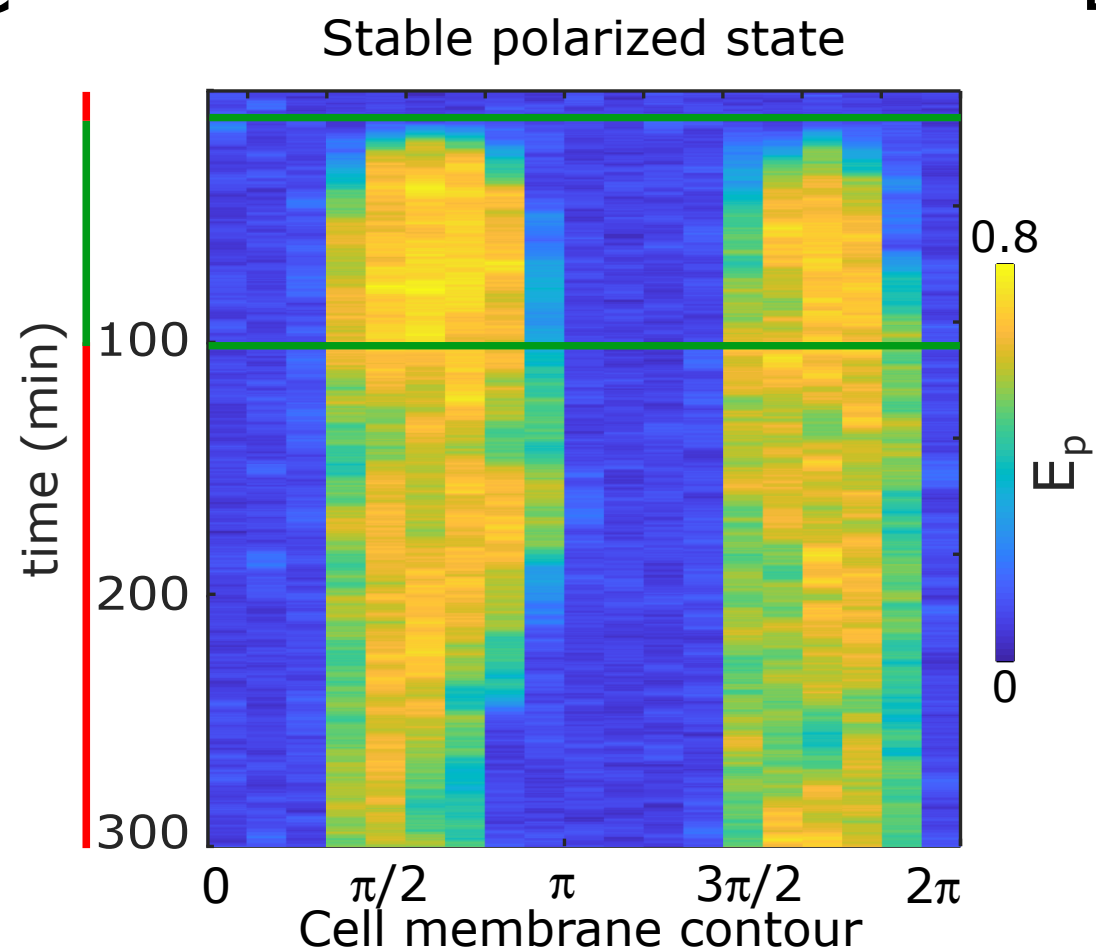**D**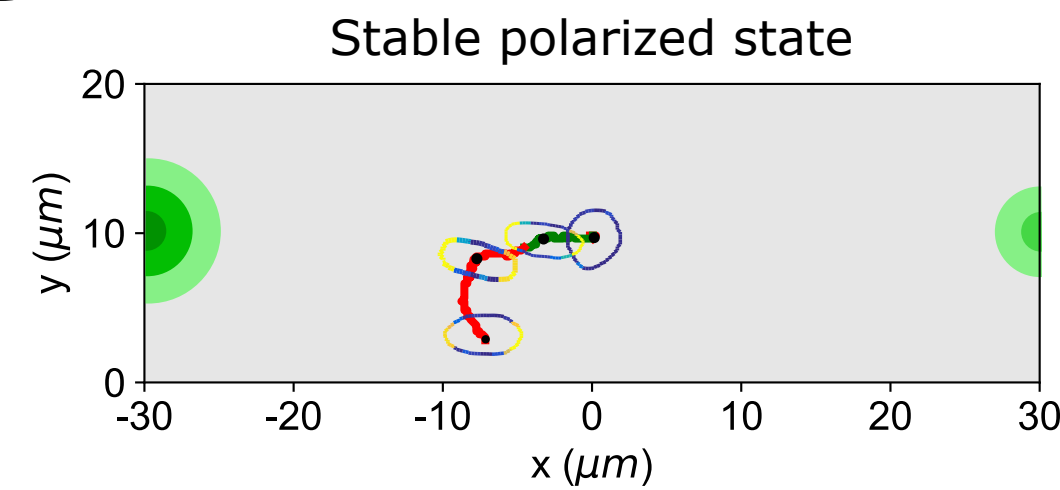

Supplement: supp [file elife-76825-supp-v1.zip]

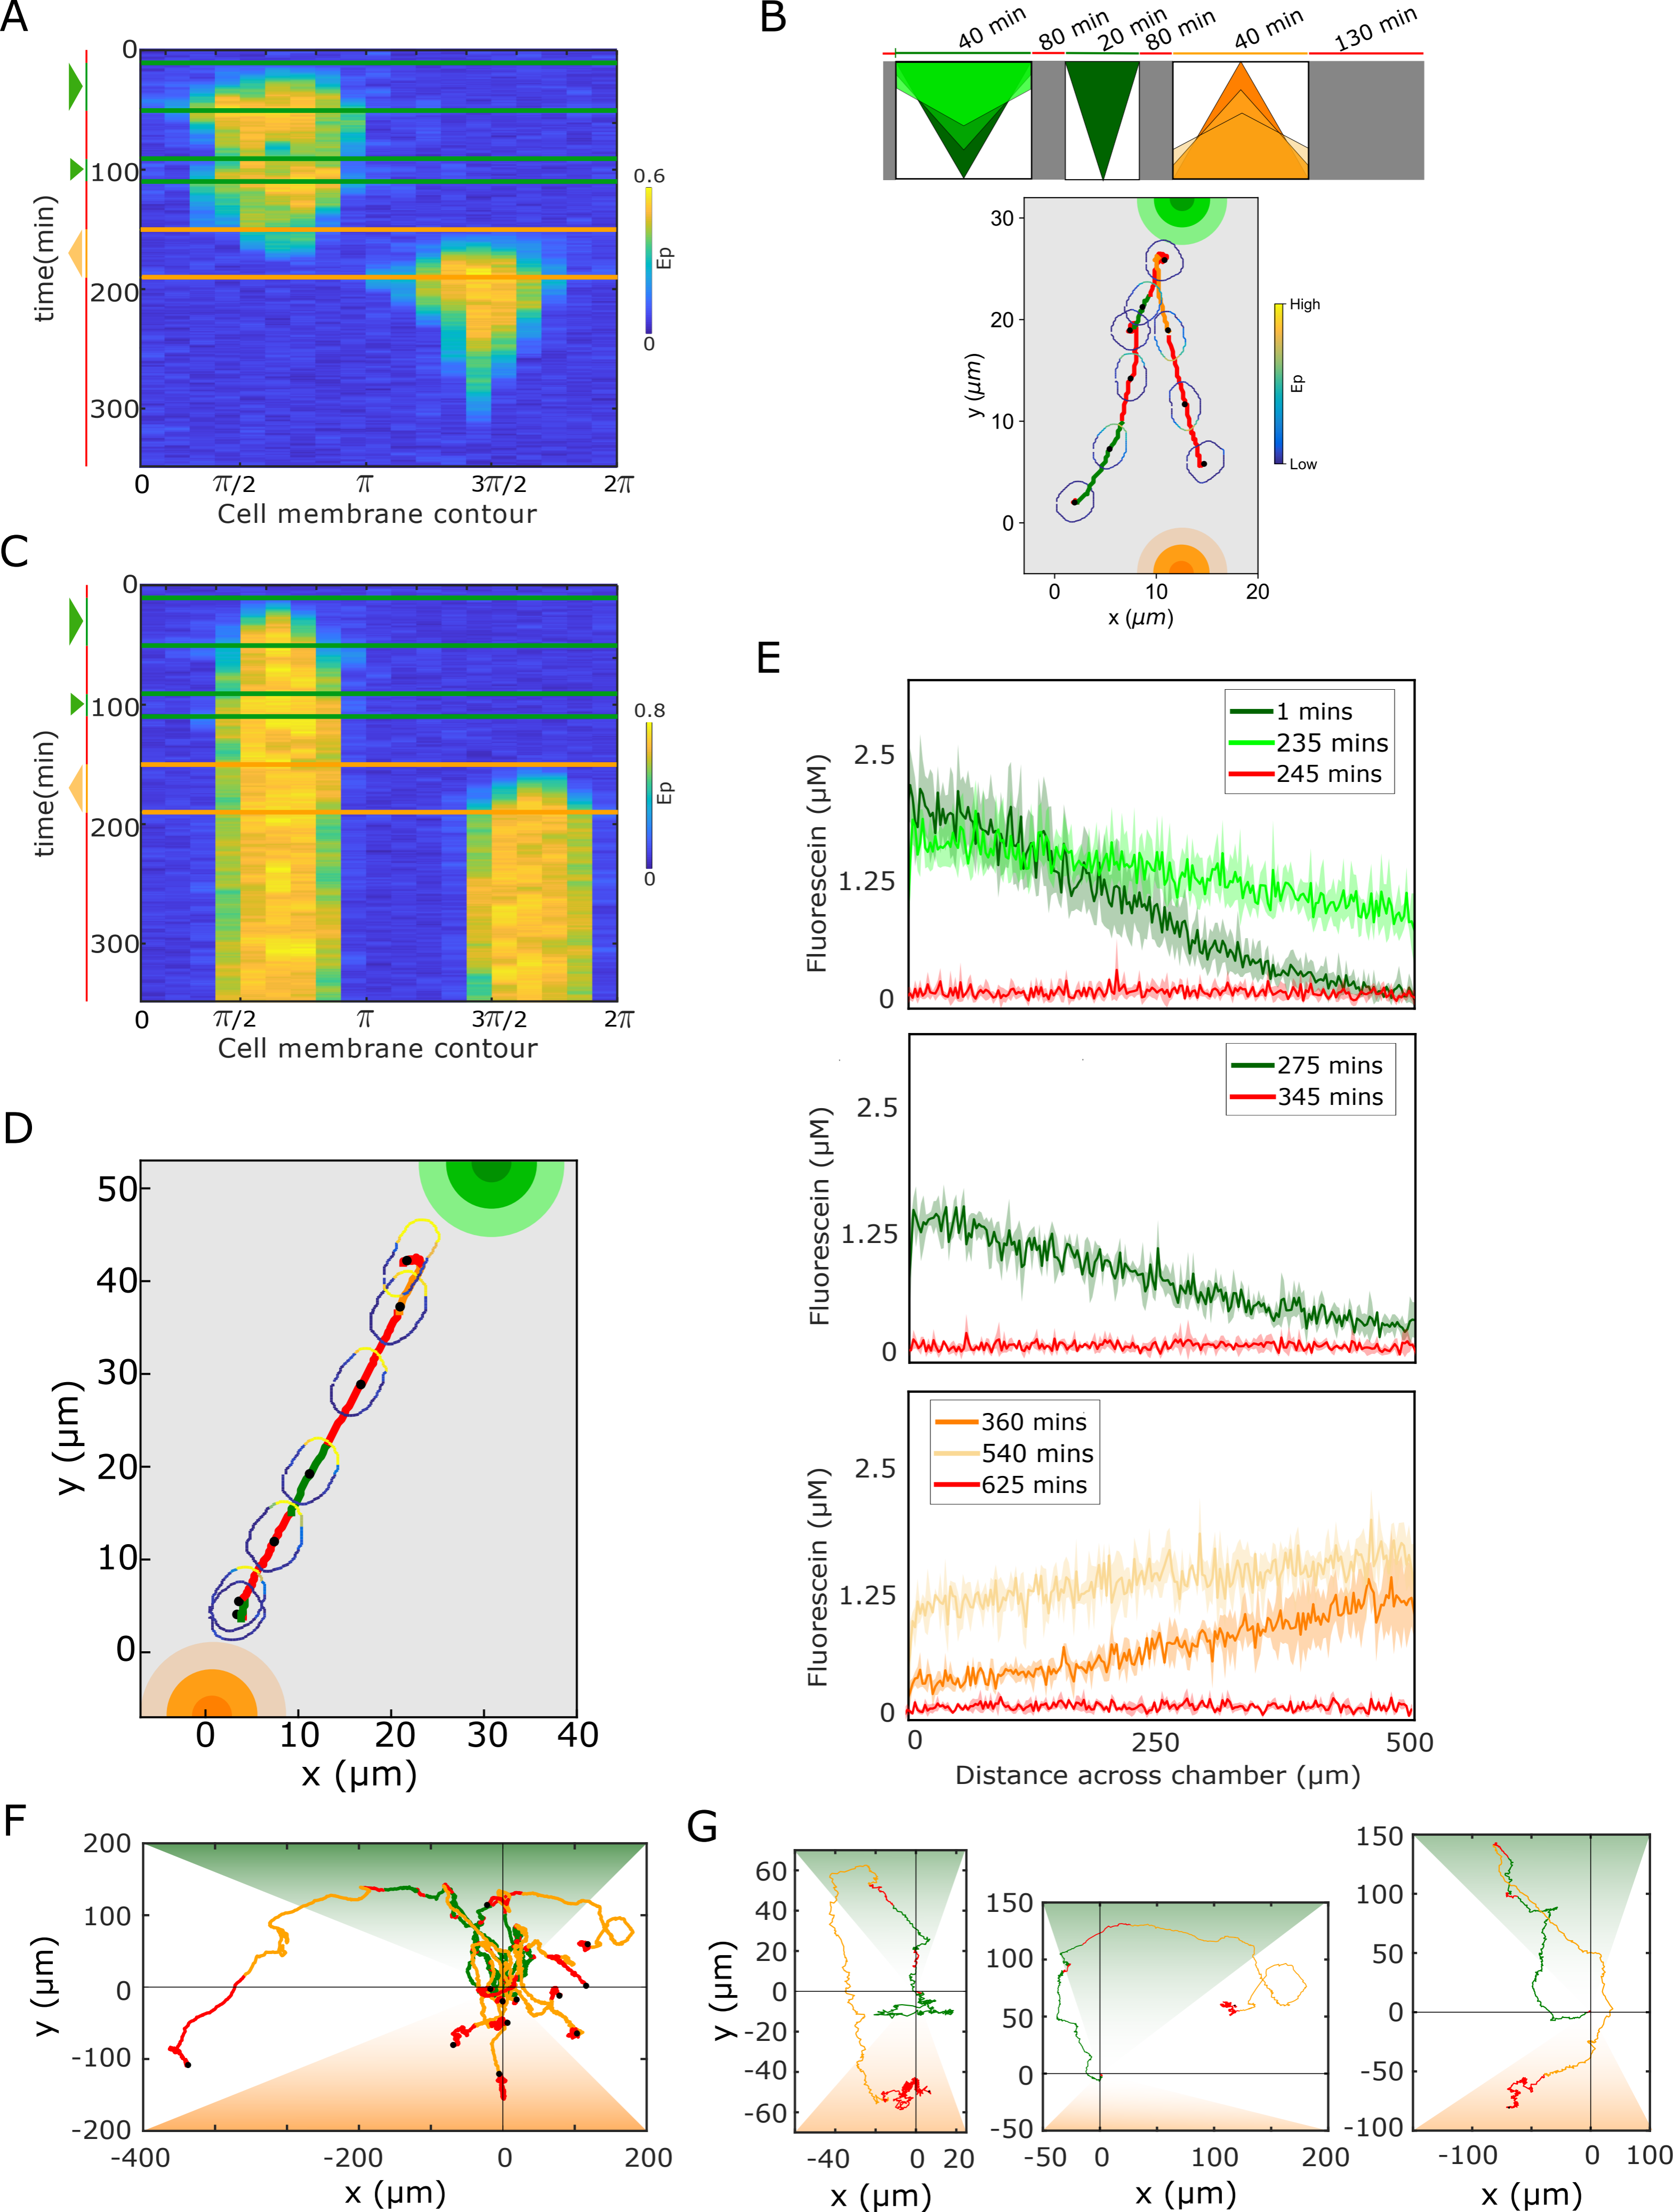

Supplement: supp [file elife-76825-supp-v1.zip]

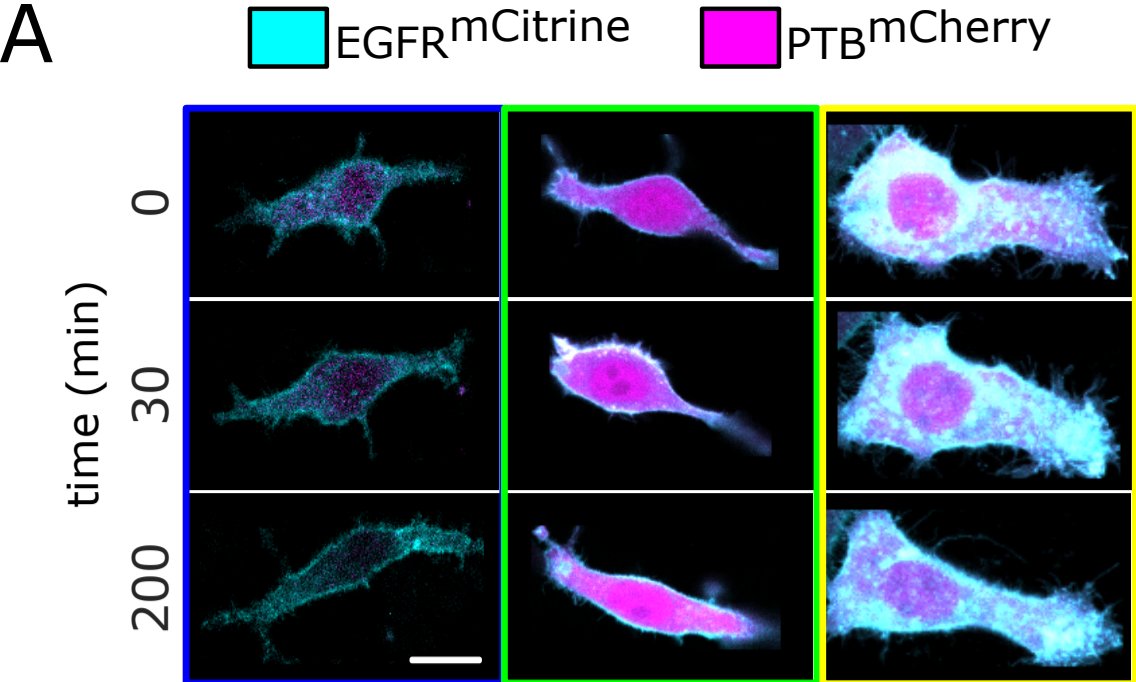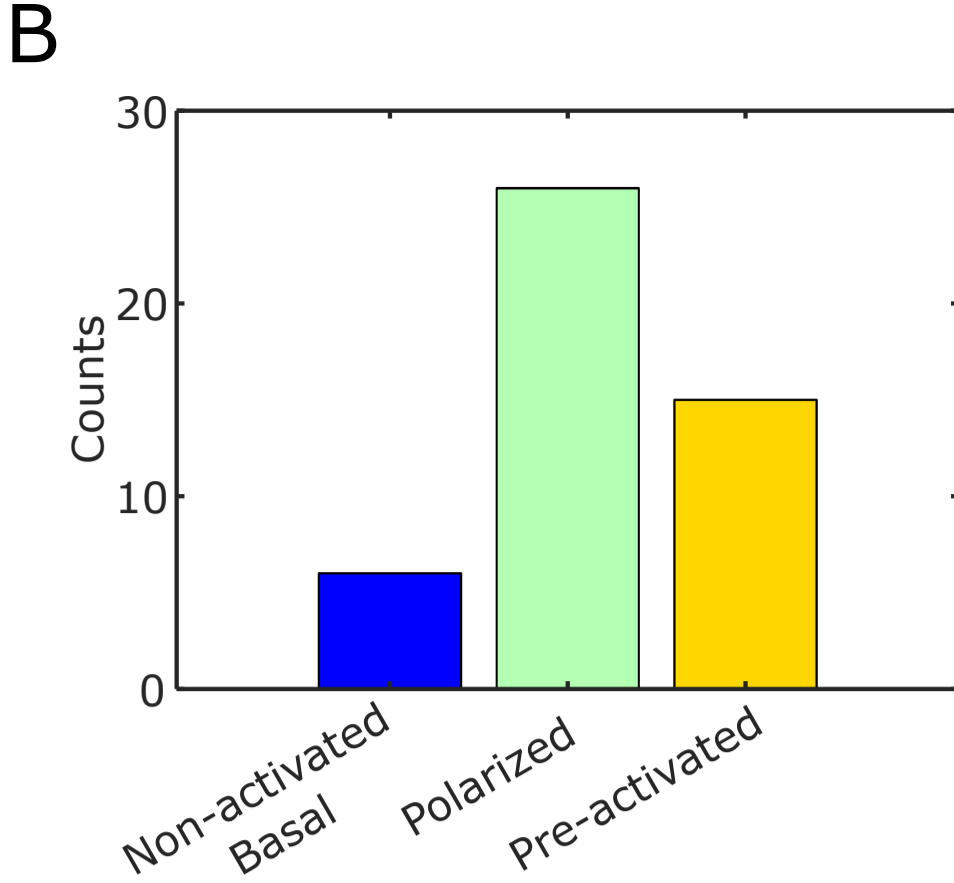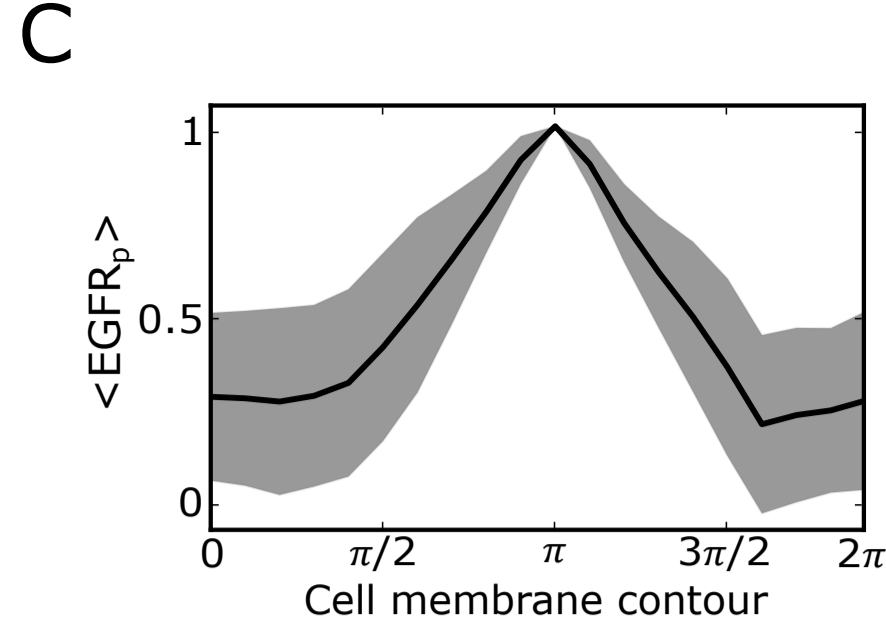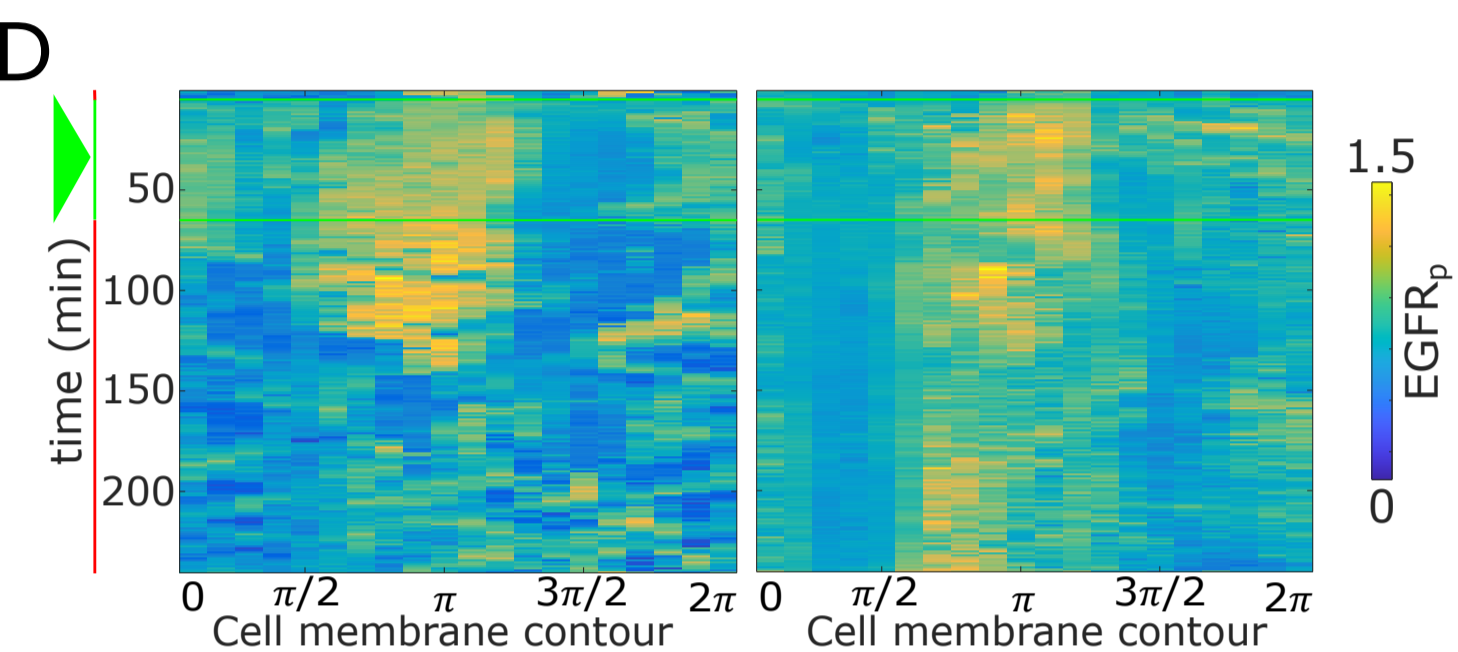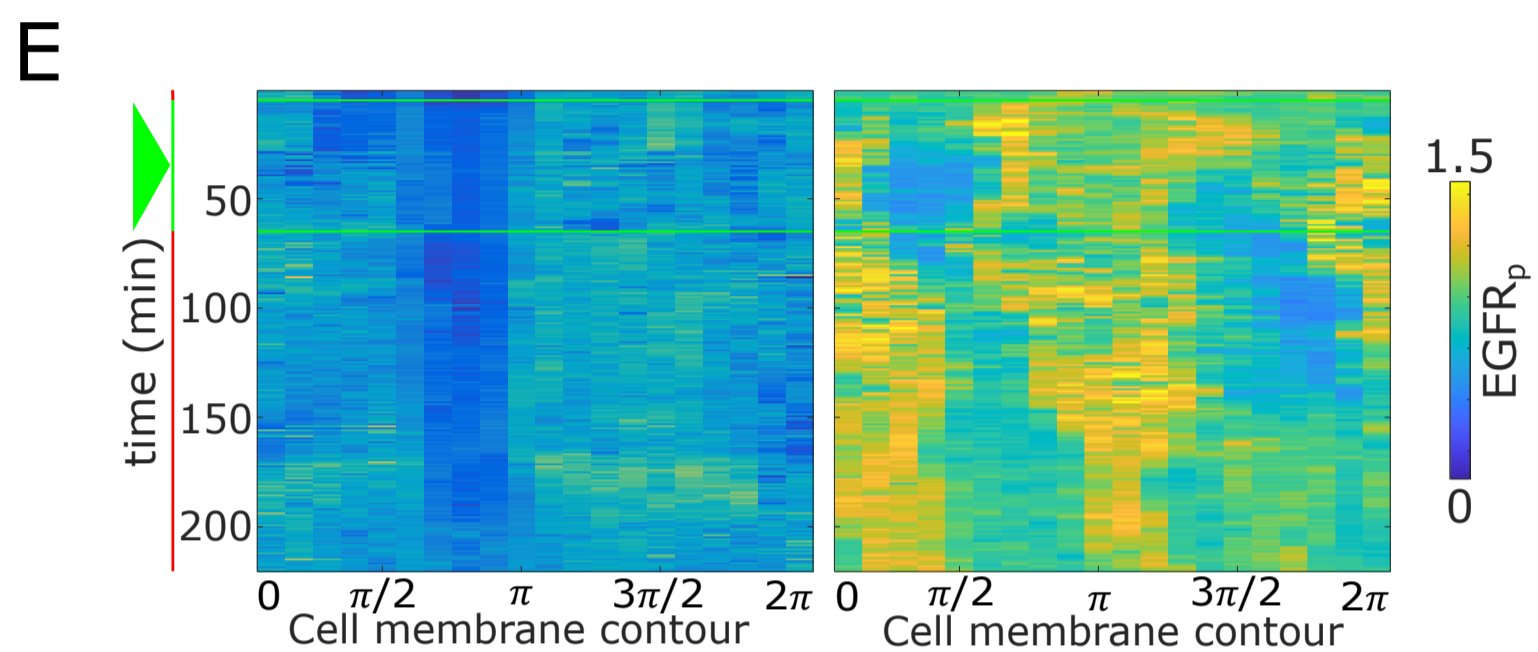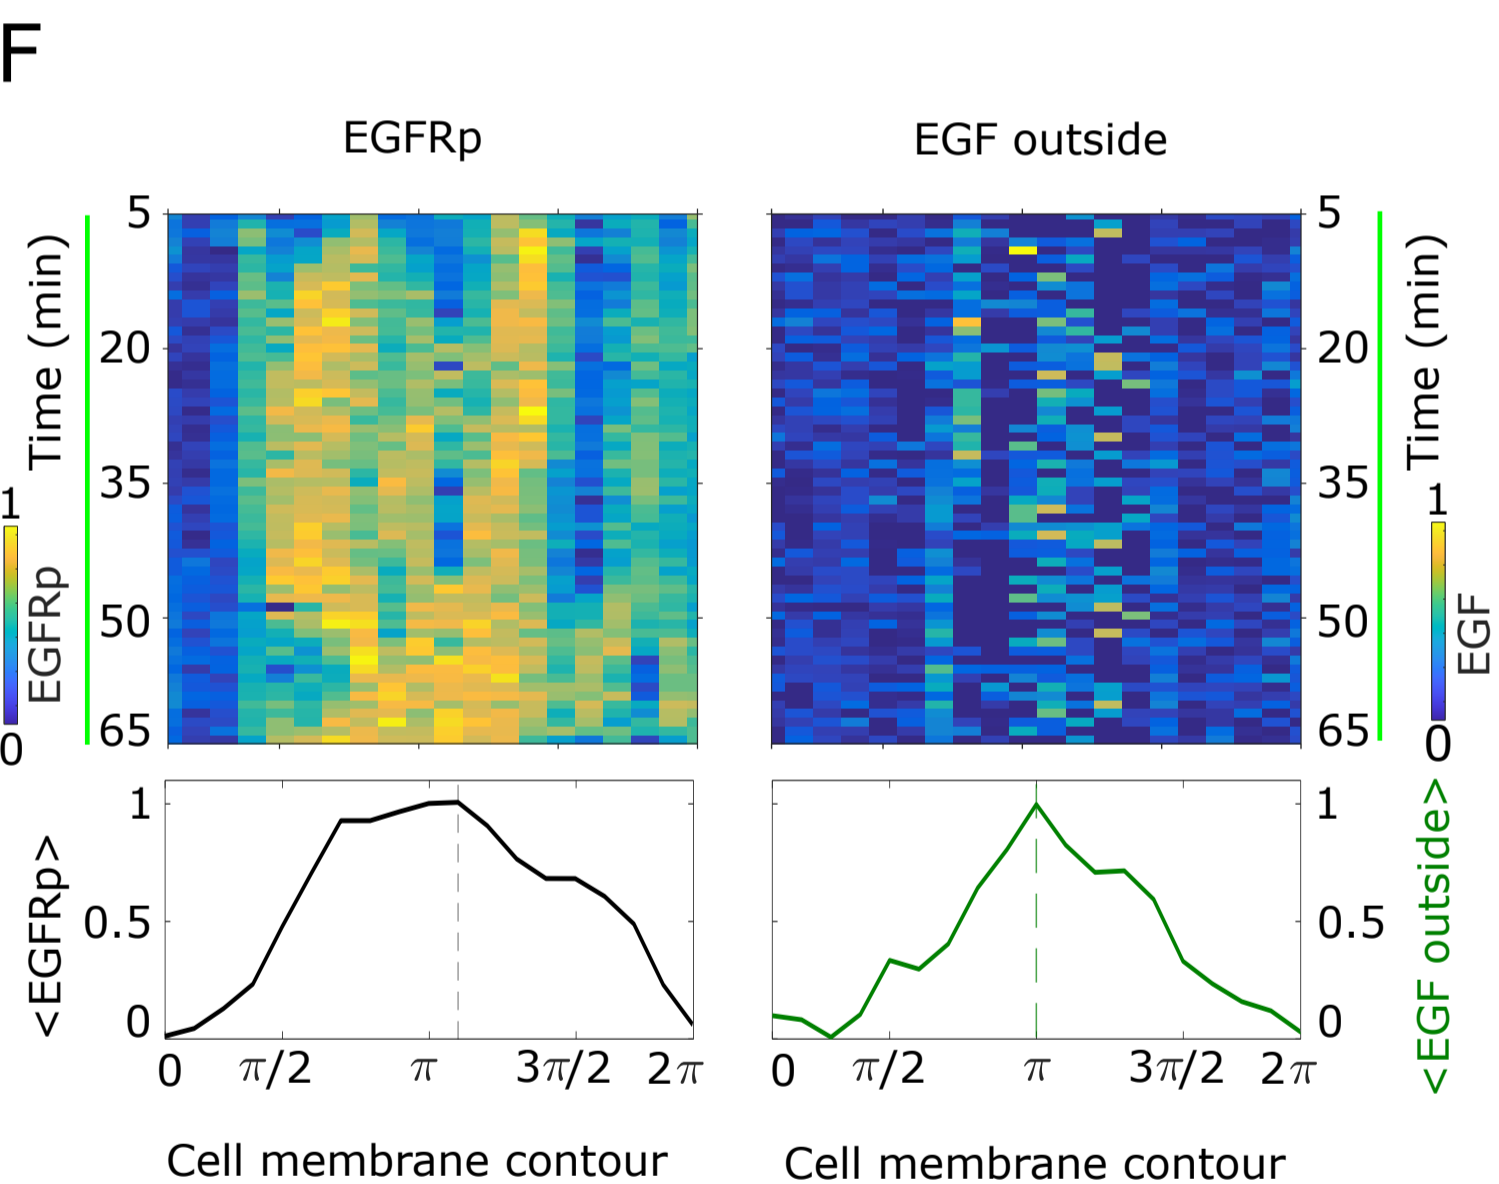

Radial Representation

Distribution of angle  $\alpha$

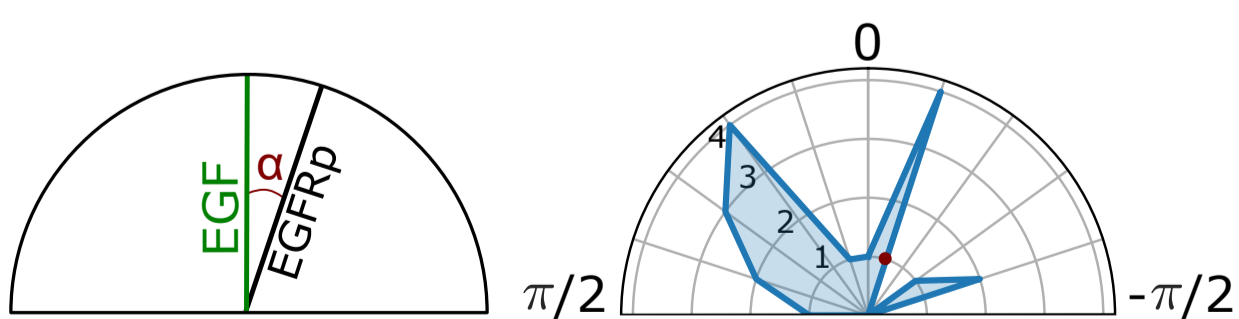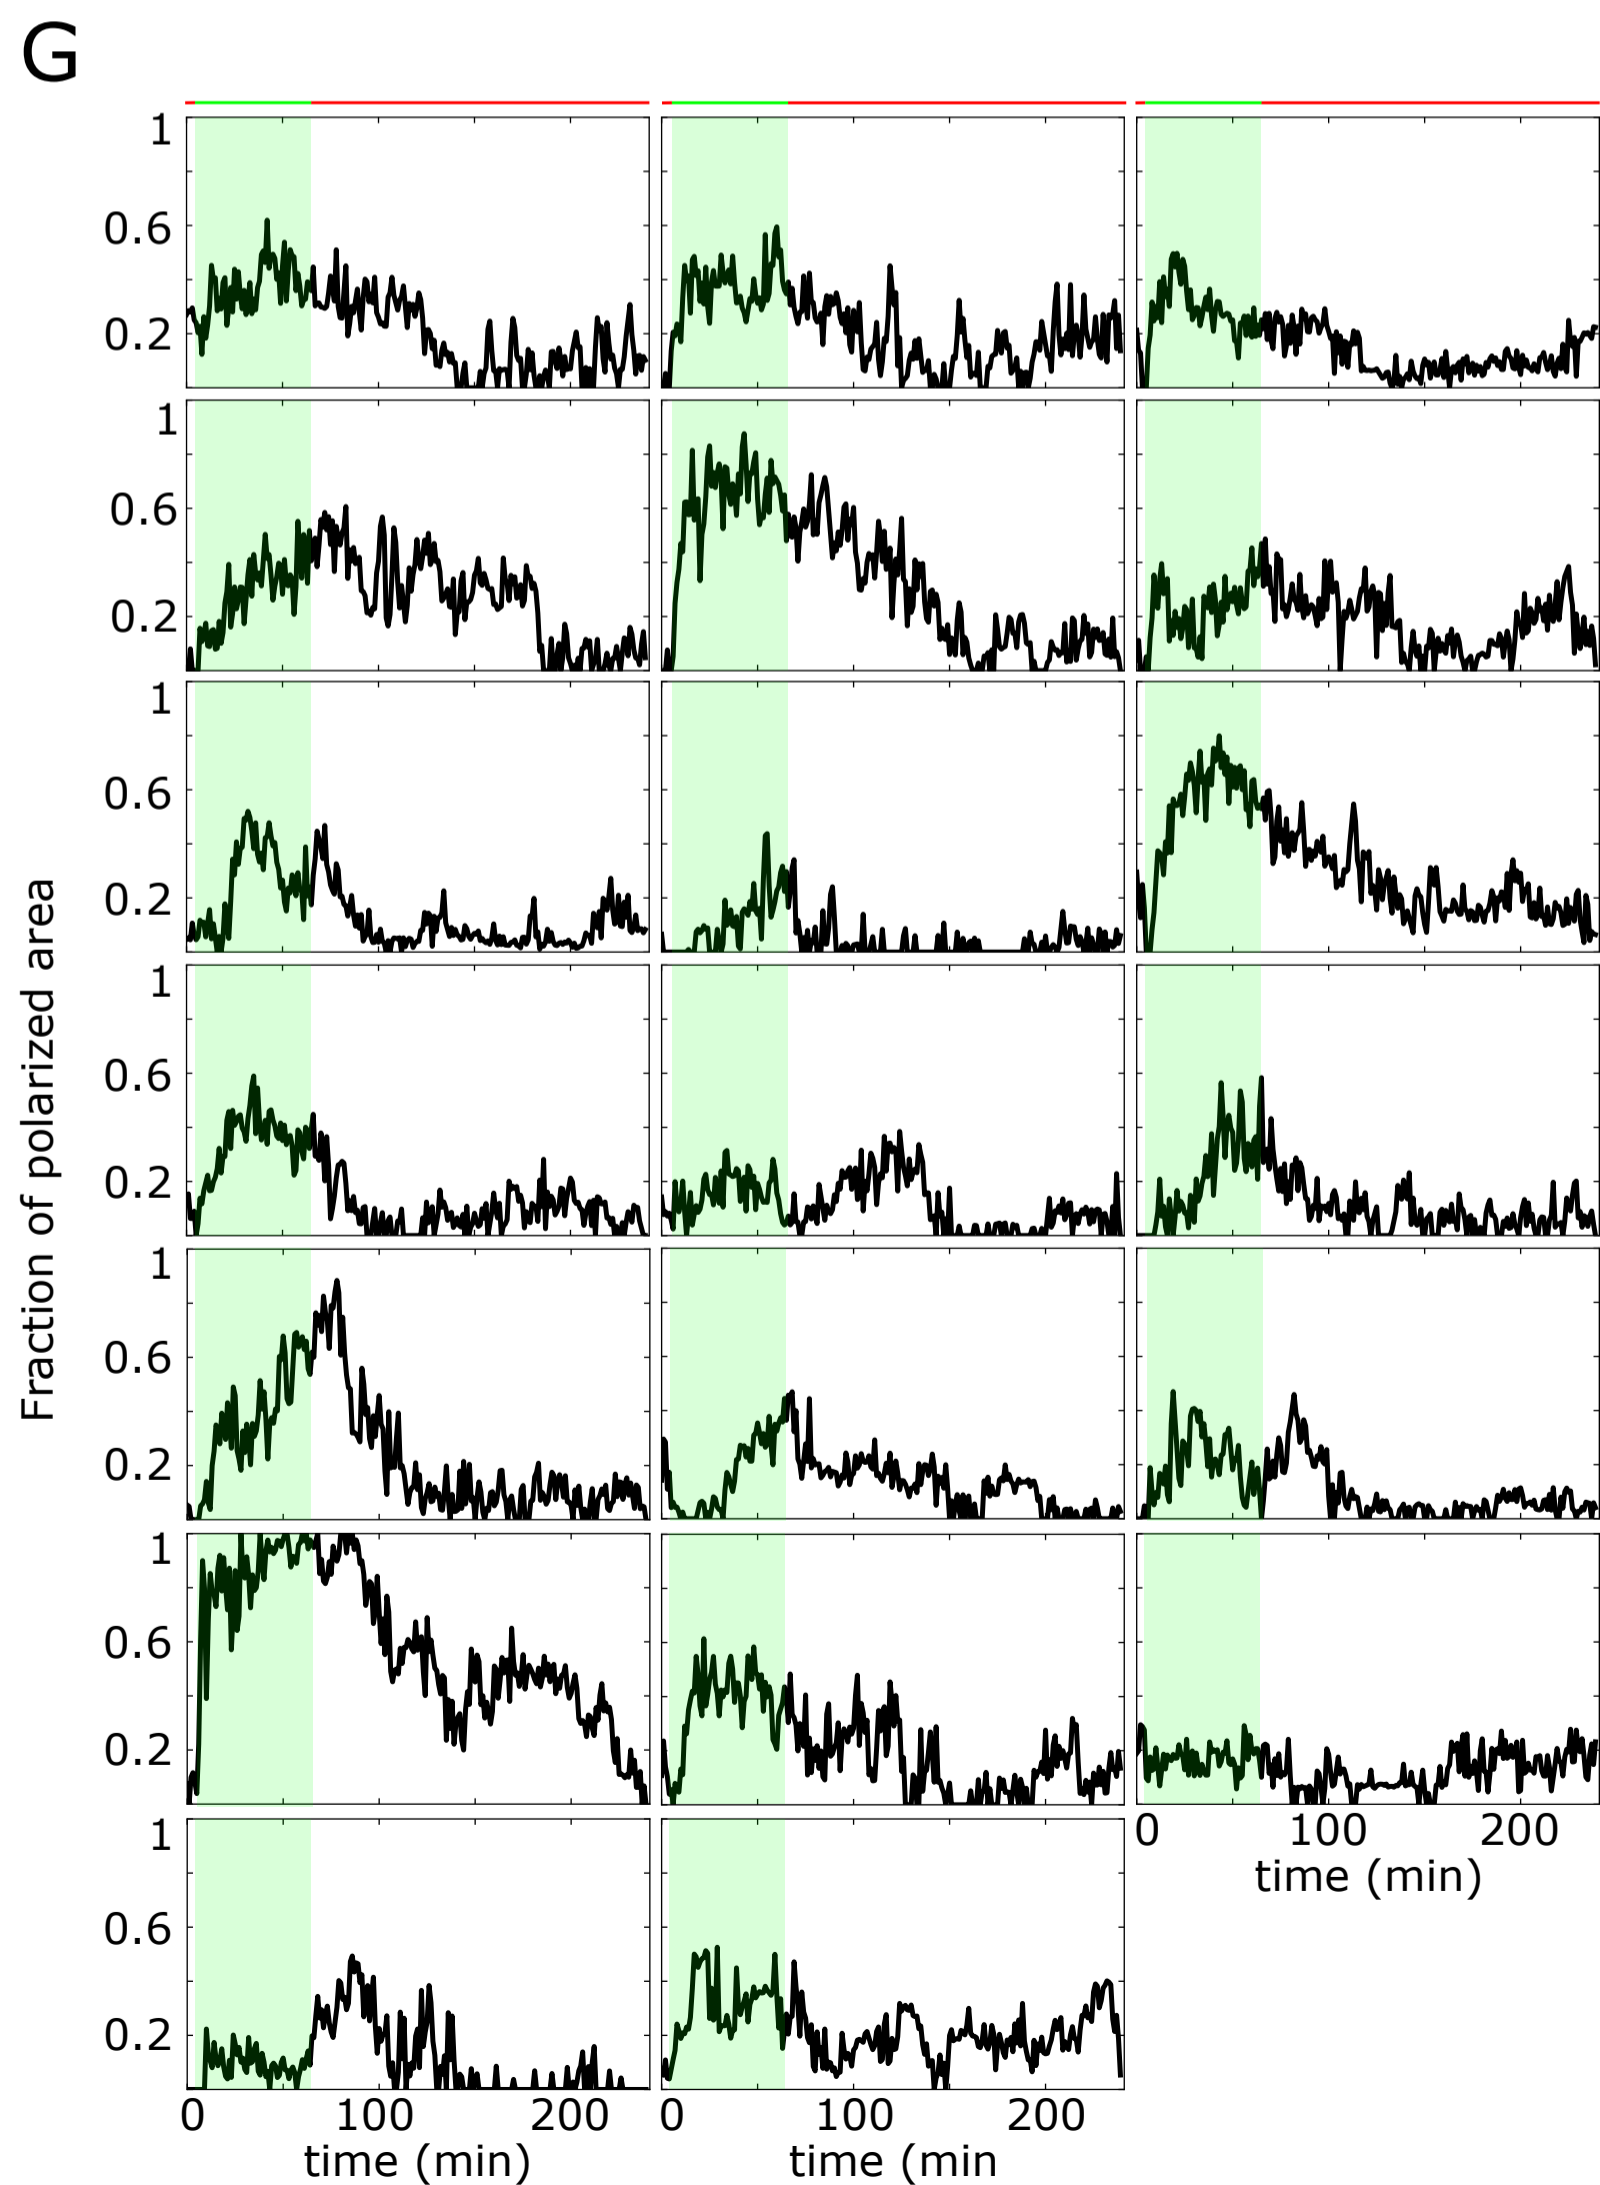

Supplement: supp [file elife-76825-supp-v1.zip]

A

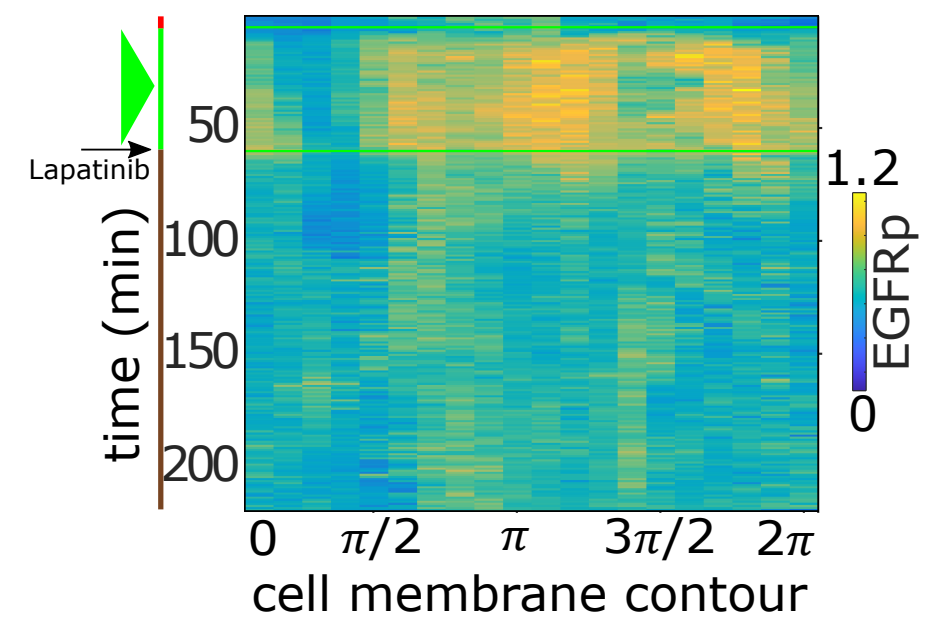

B

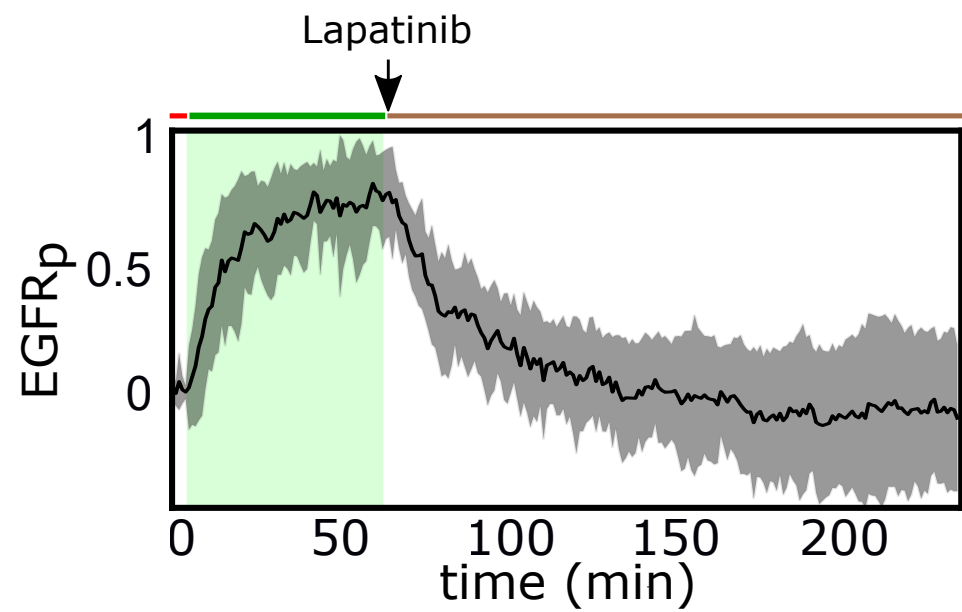

C

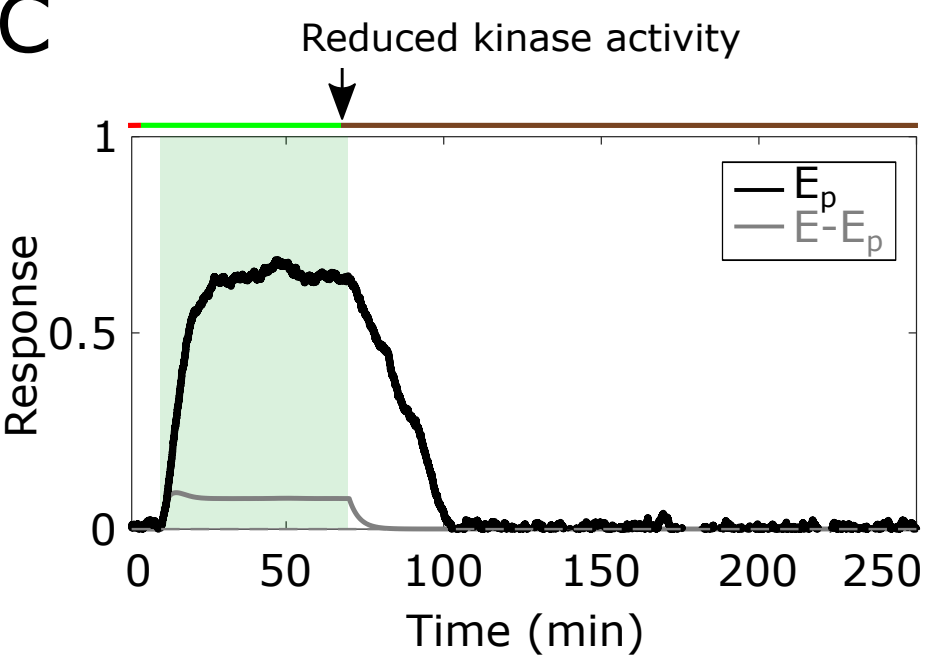

D

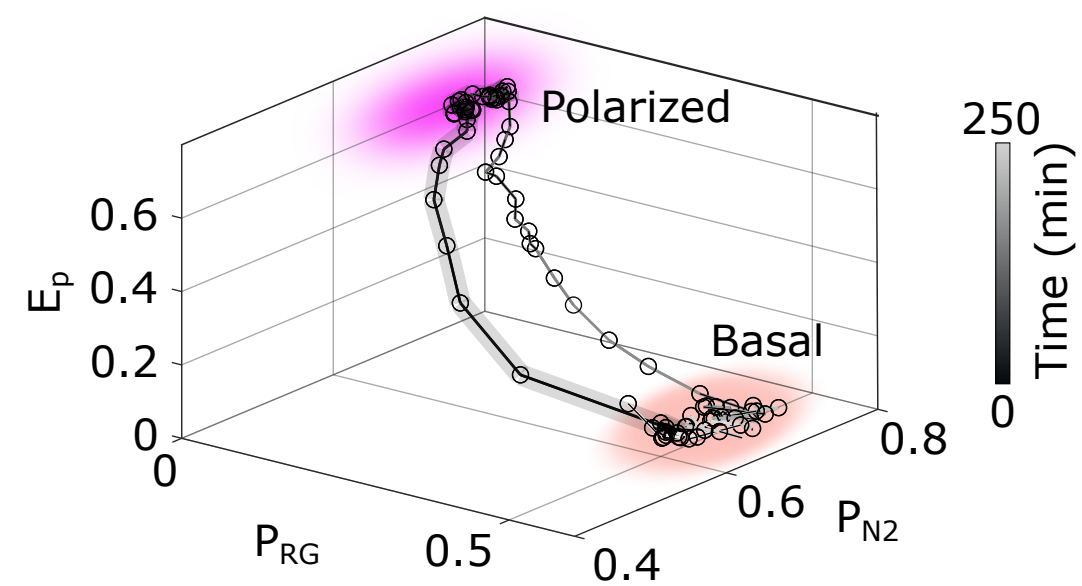

E

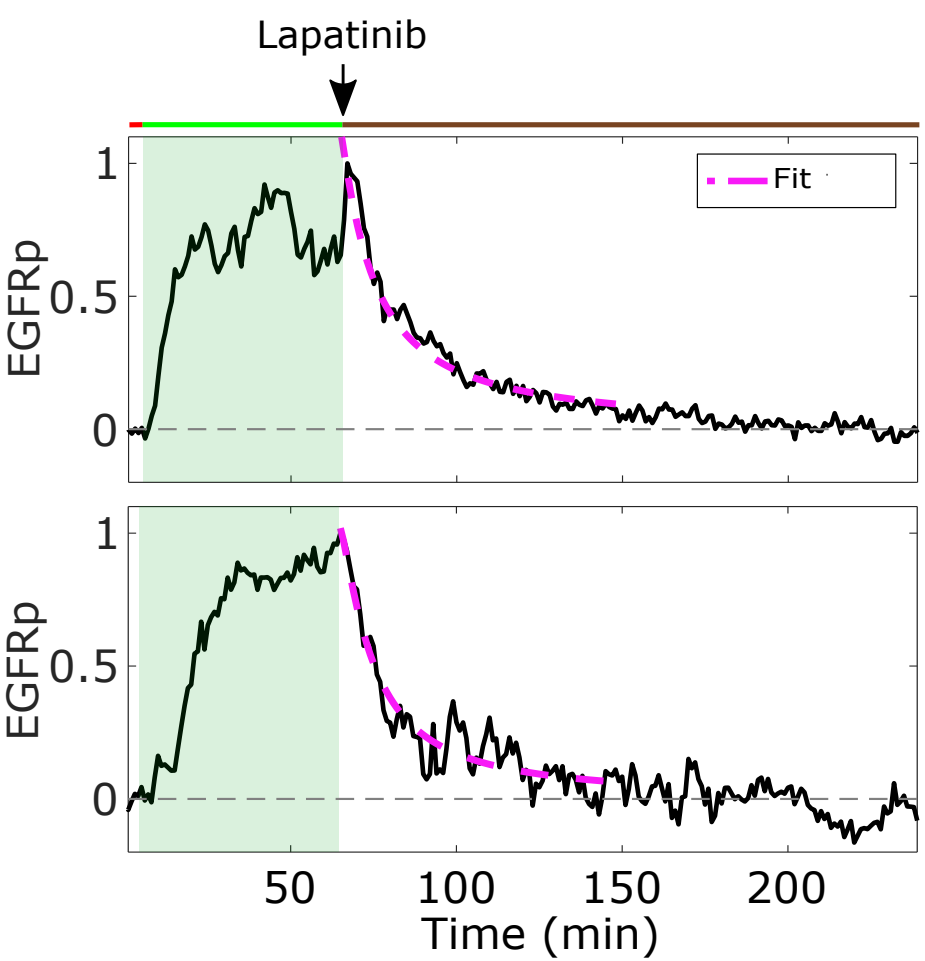

F

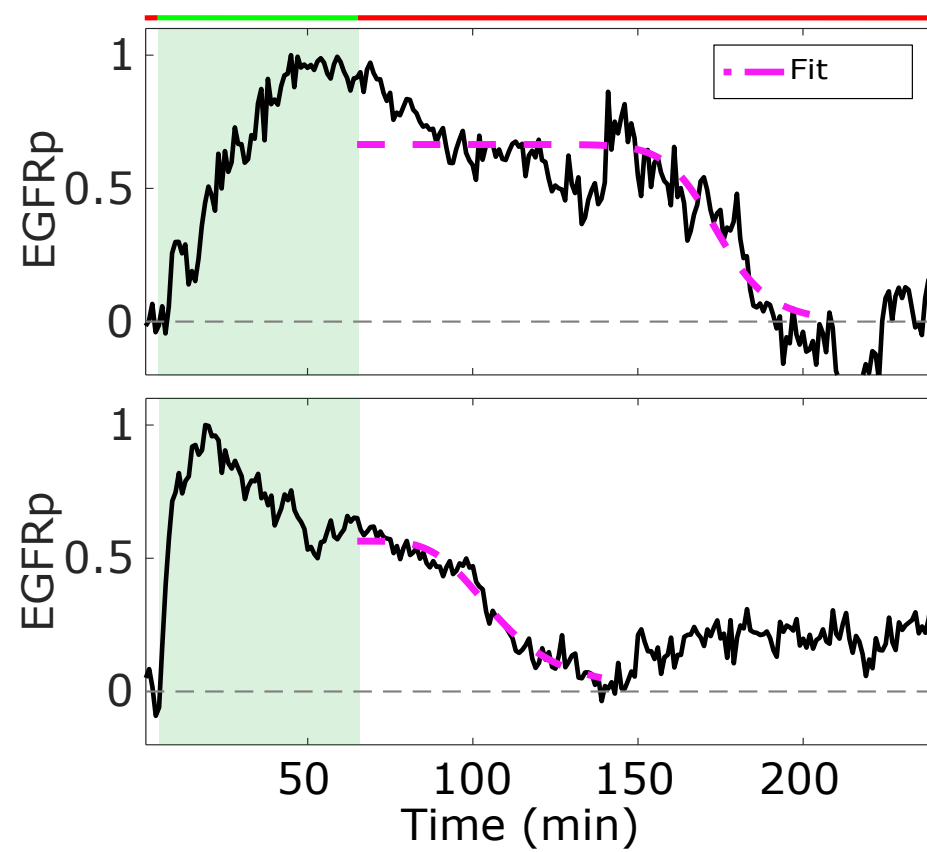

G

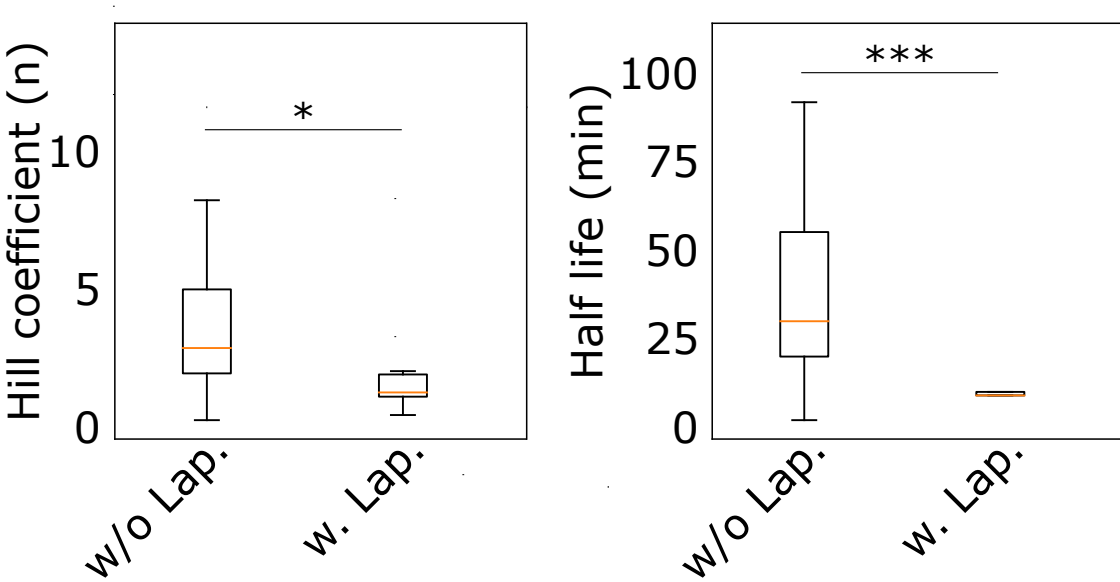

H

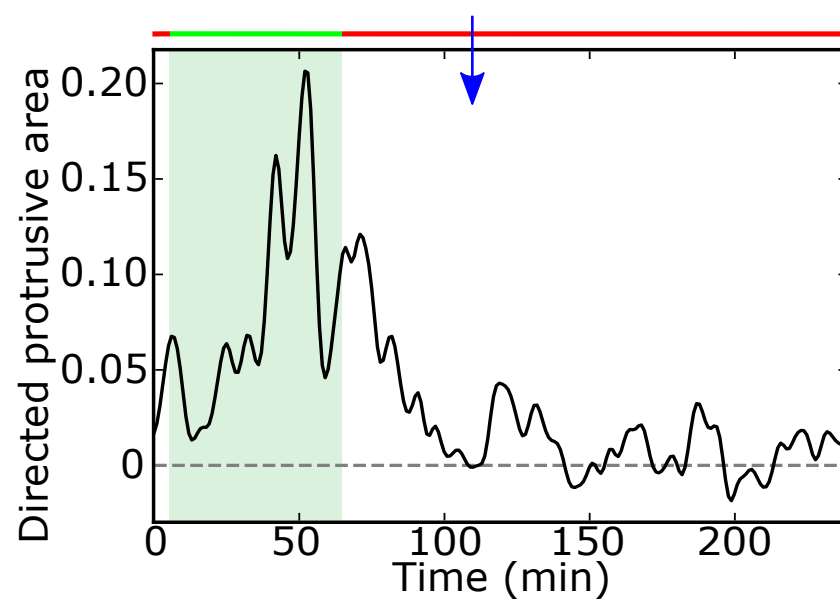

Supplement: supp [file elife-76825-supp-v1.zip]

A

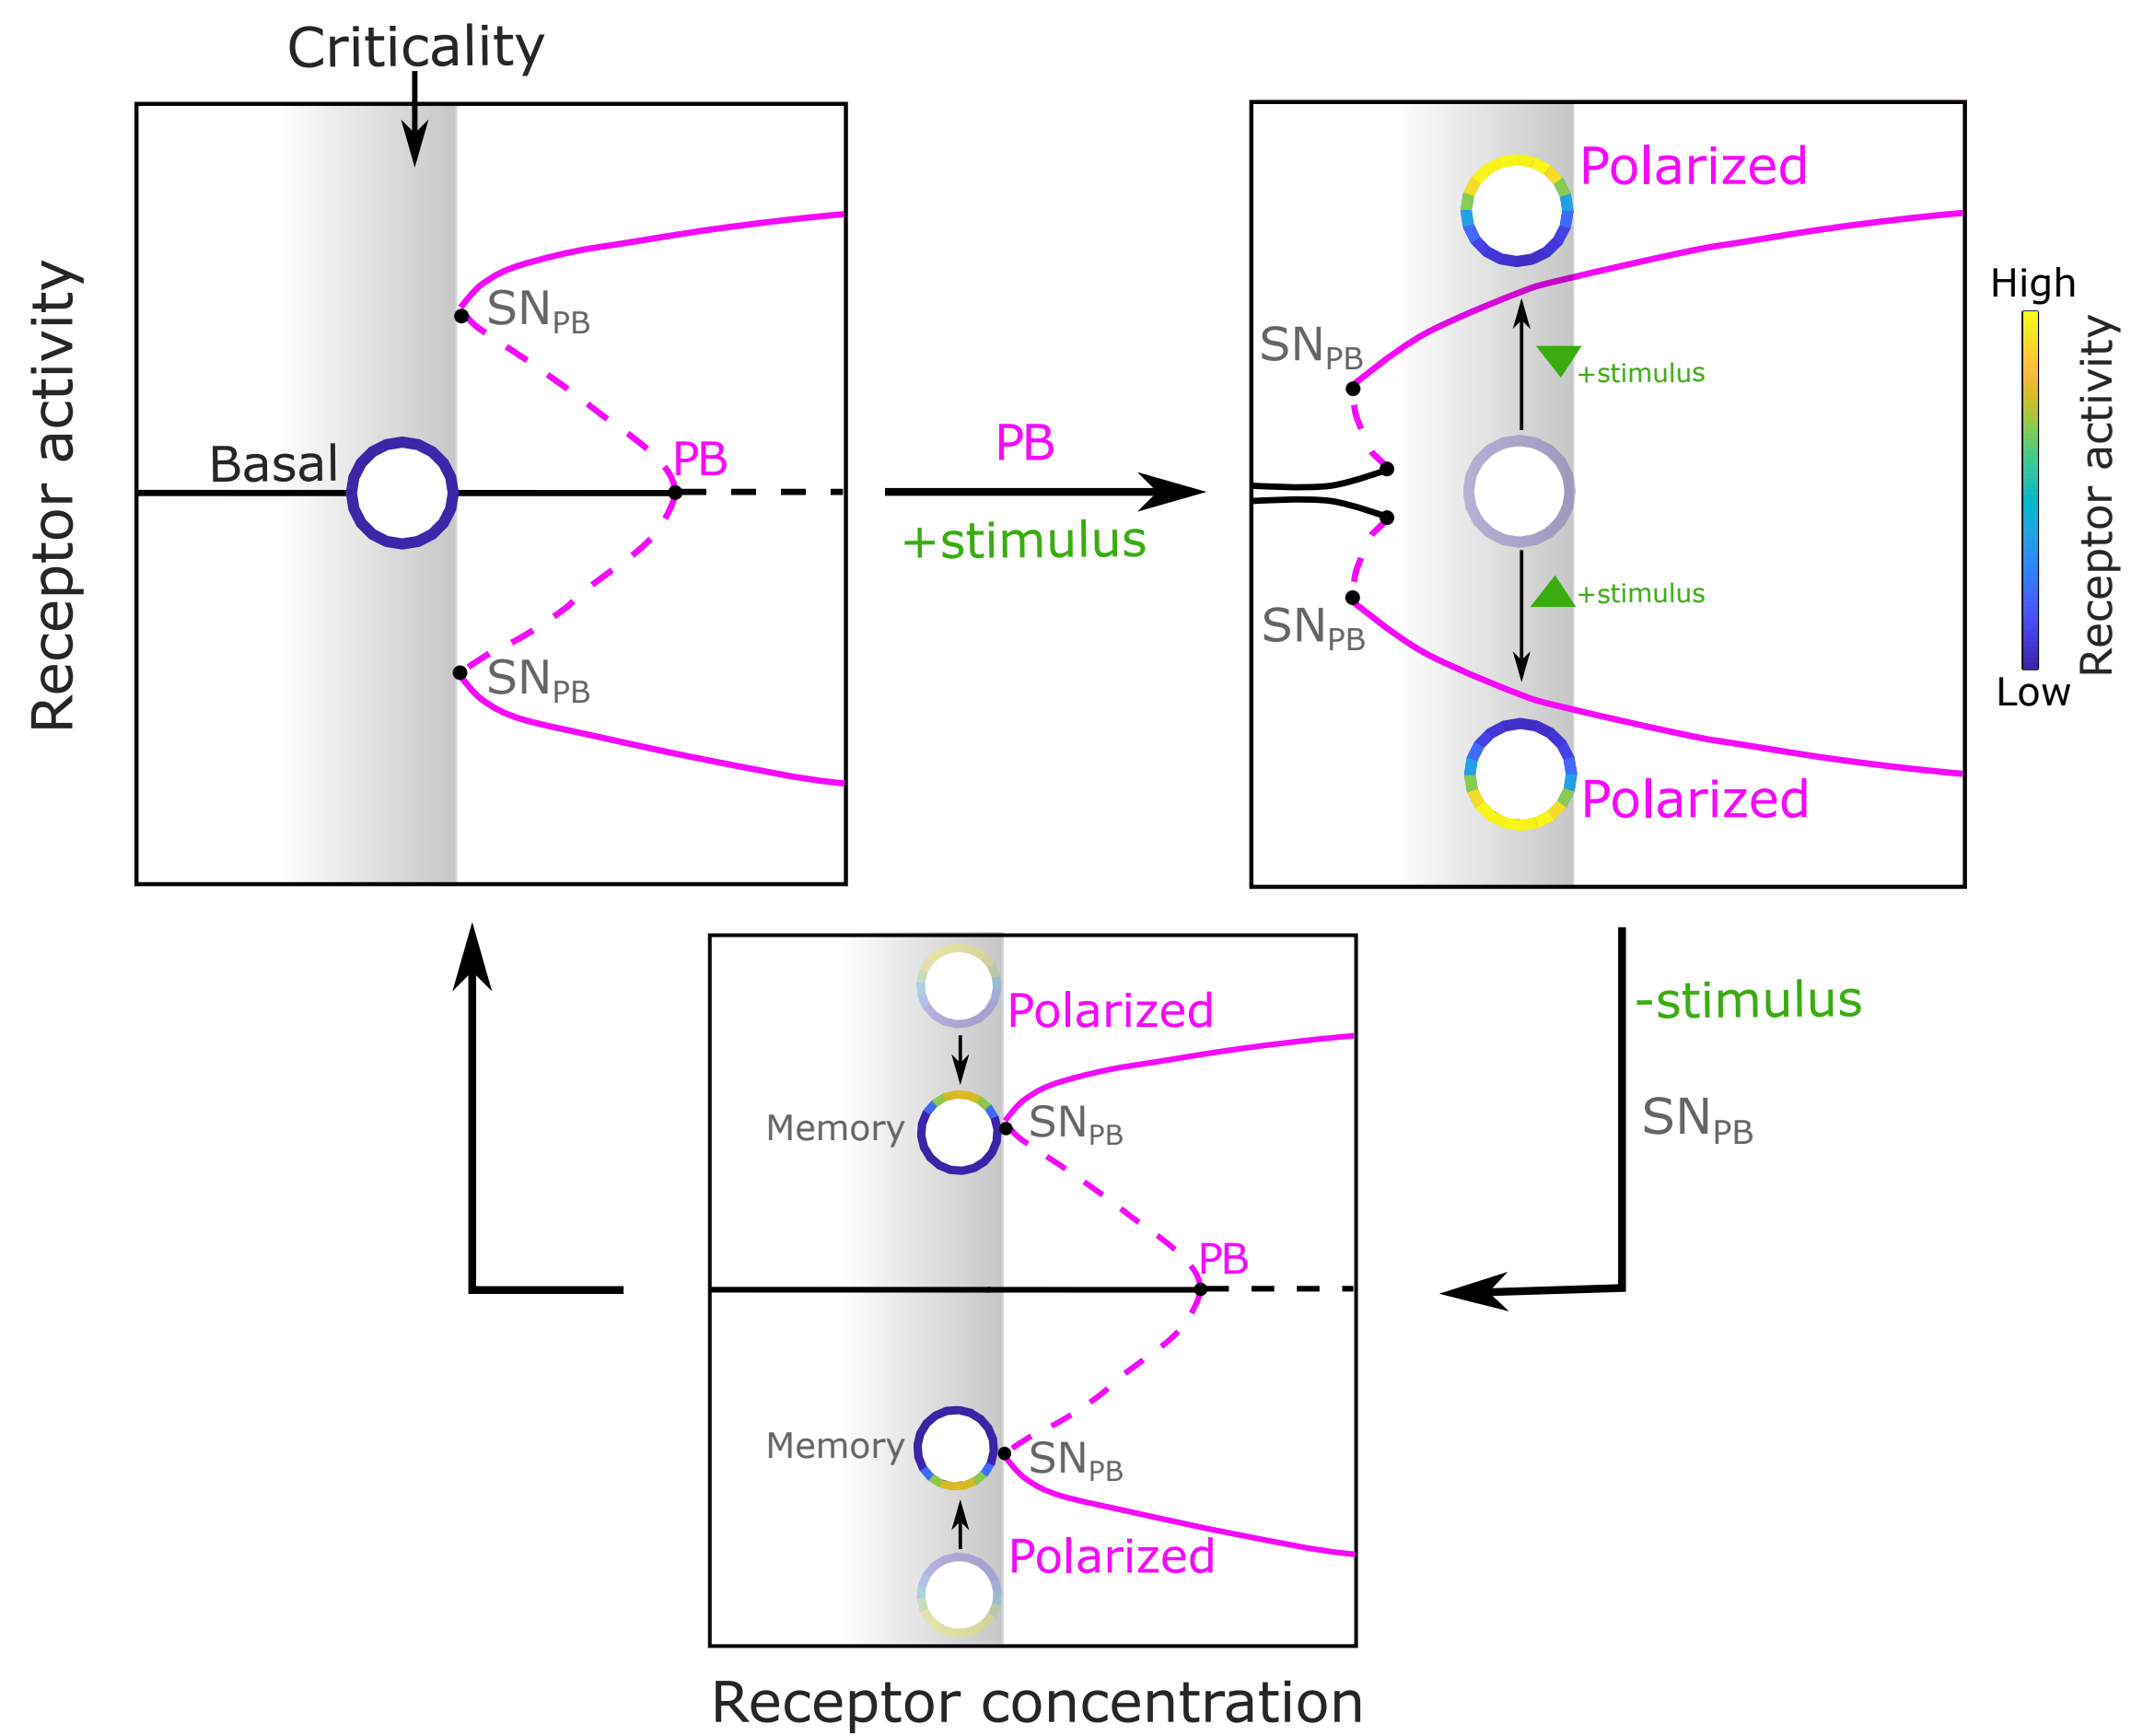

B

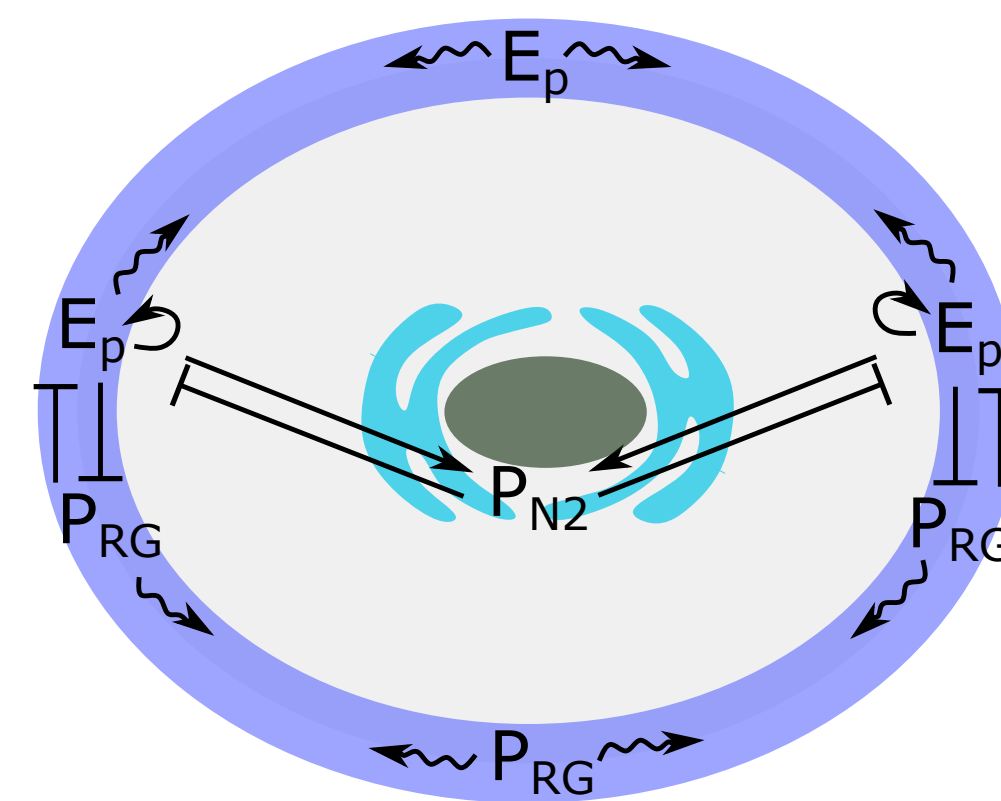

C

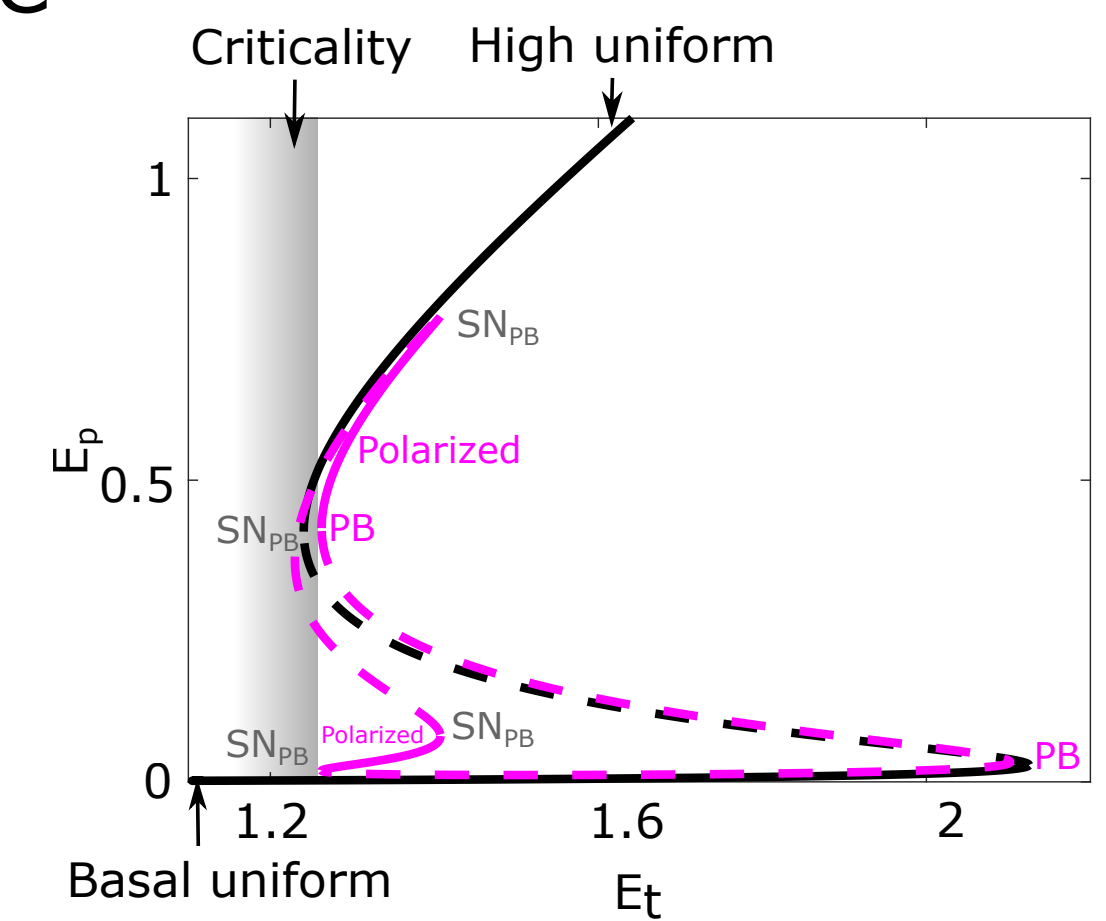

D

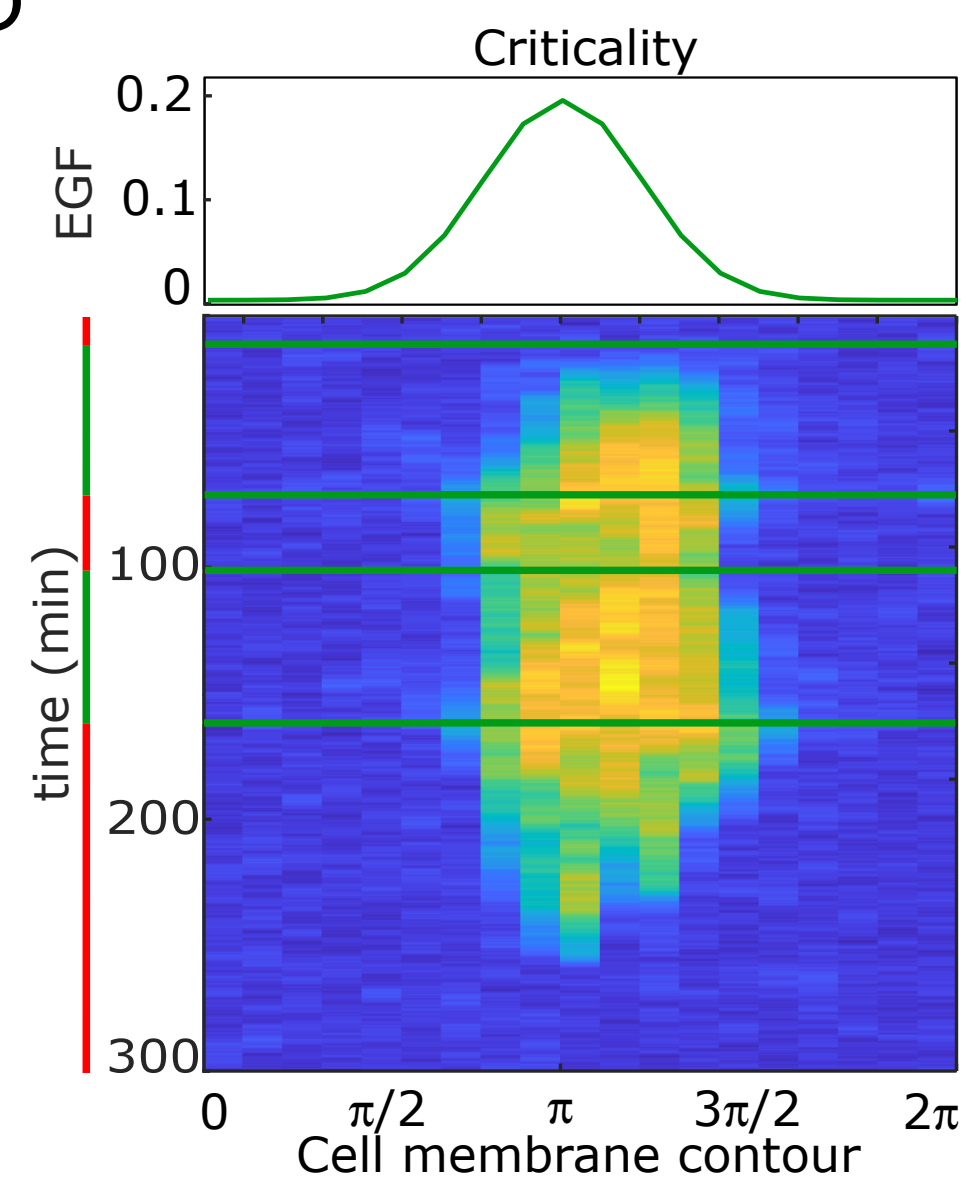

E

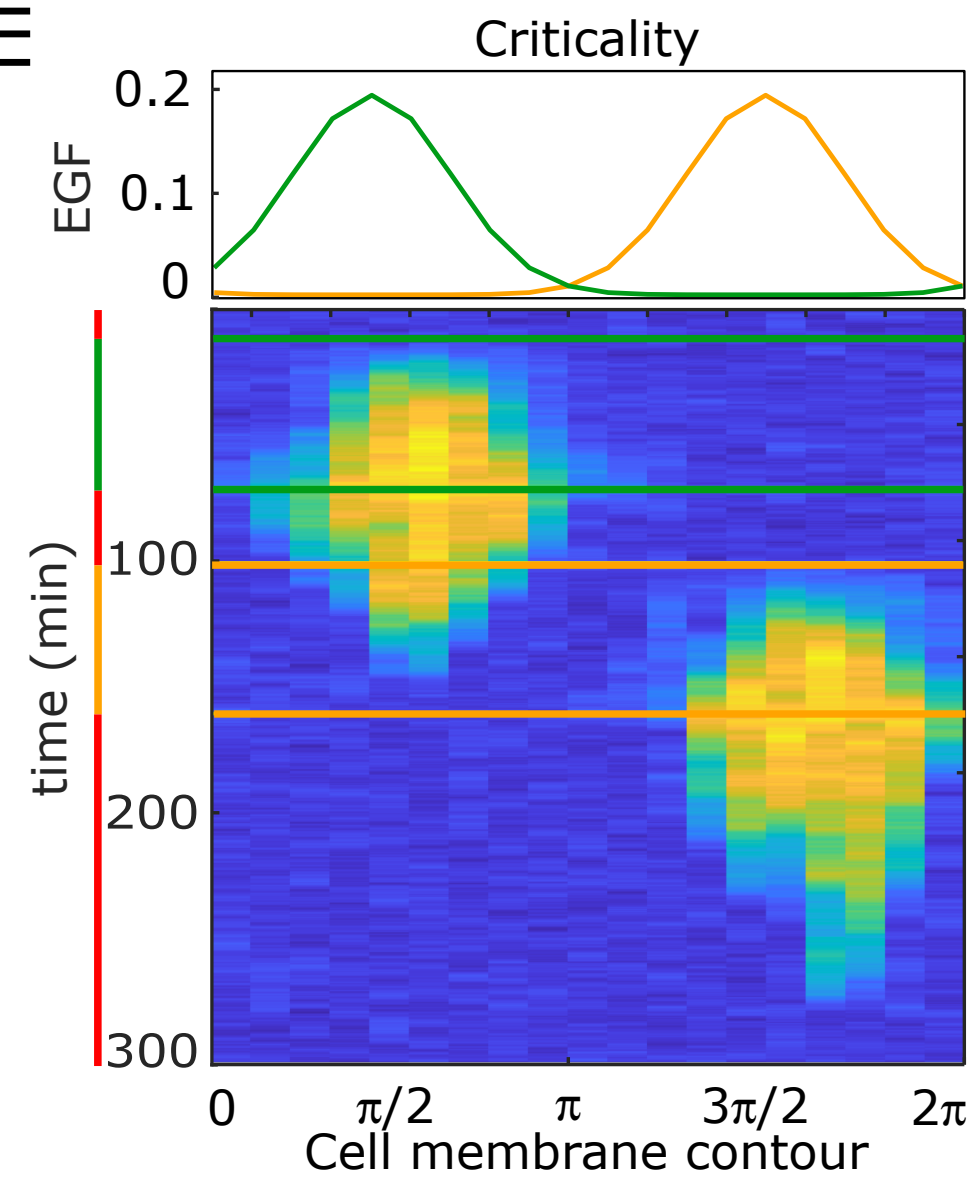

F

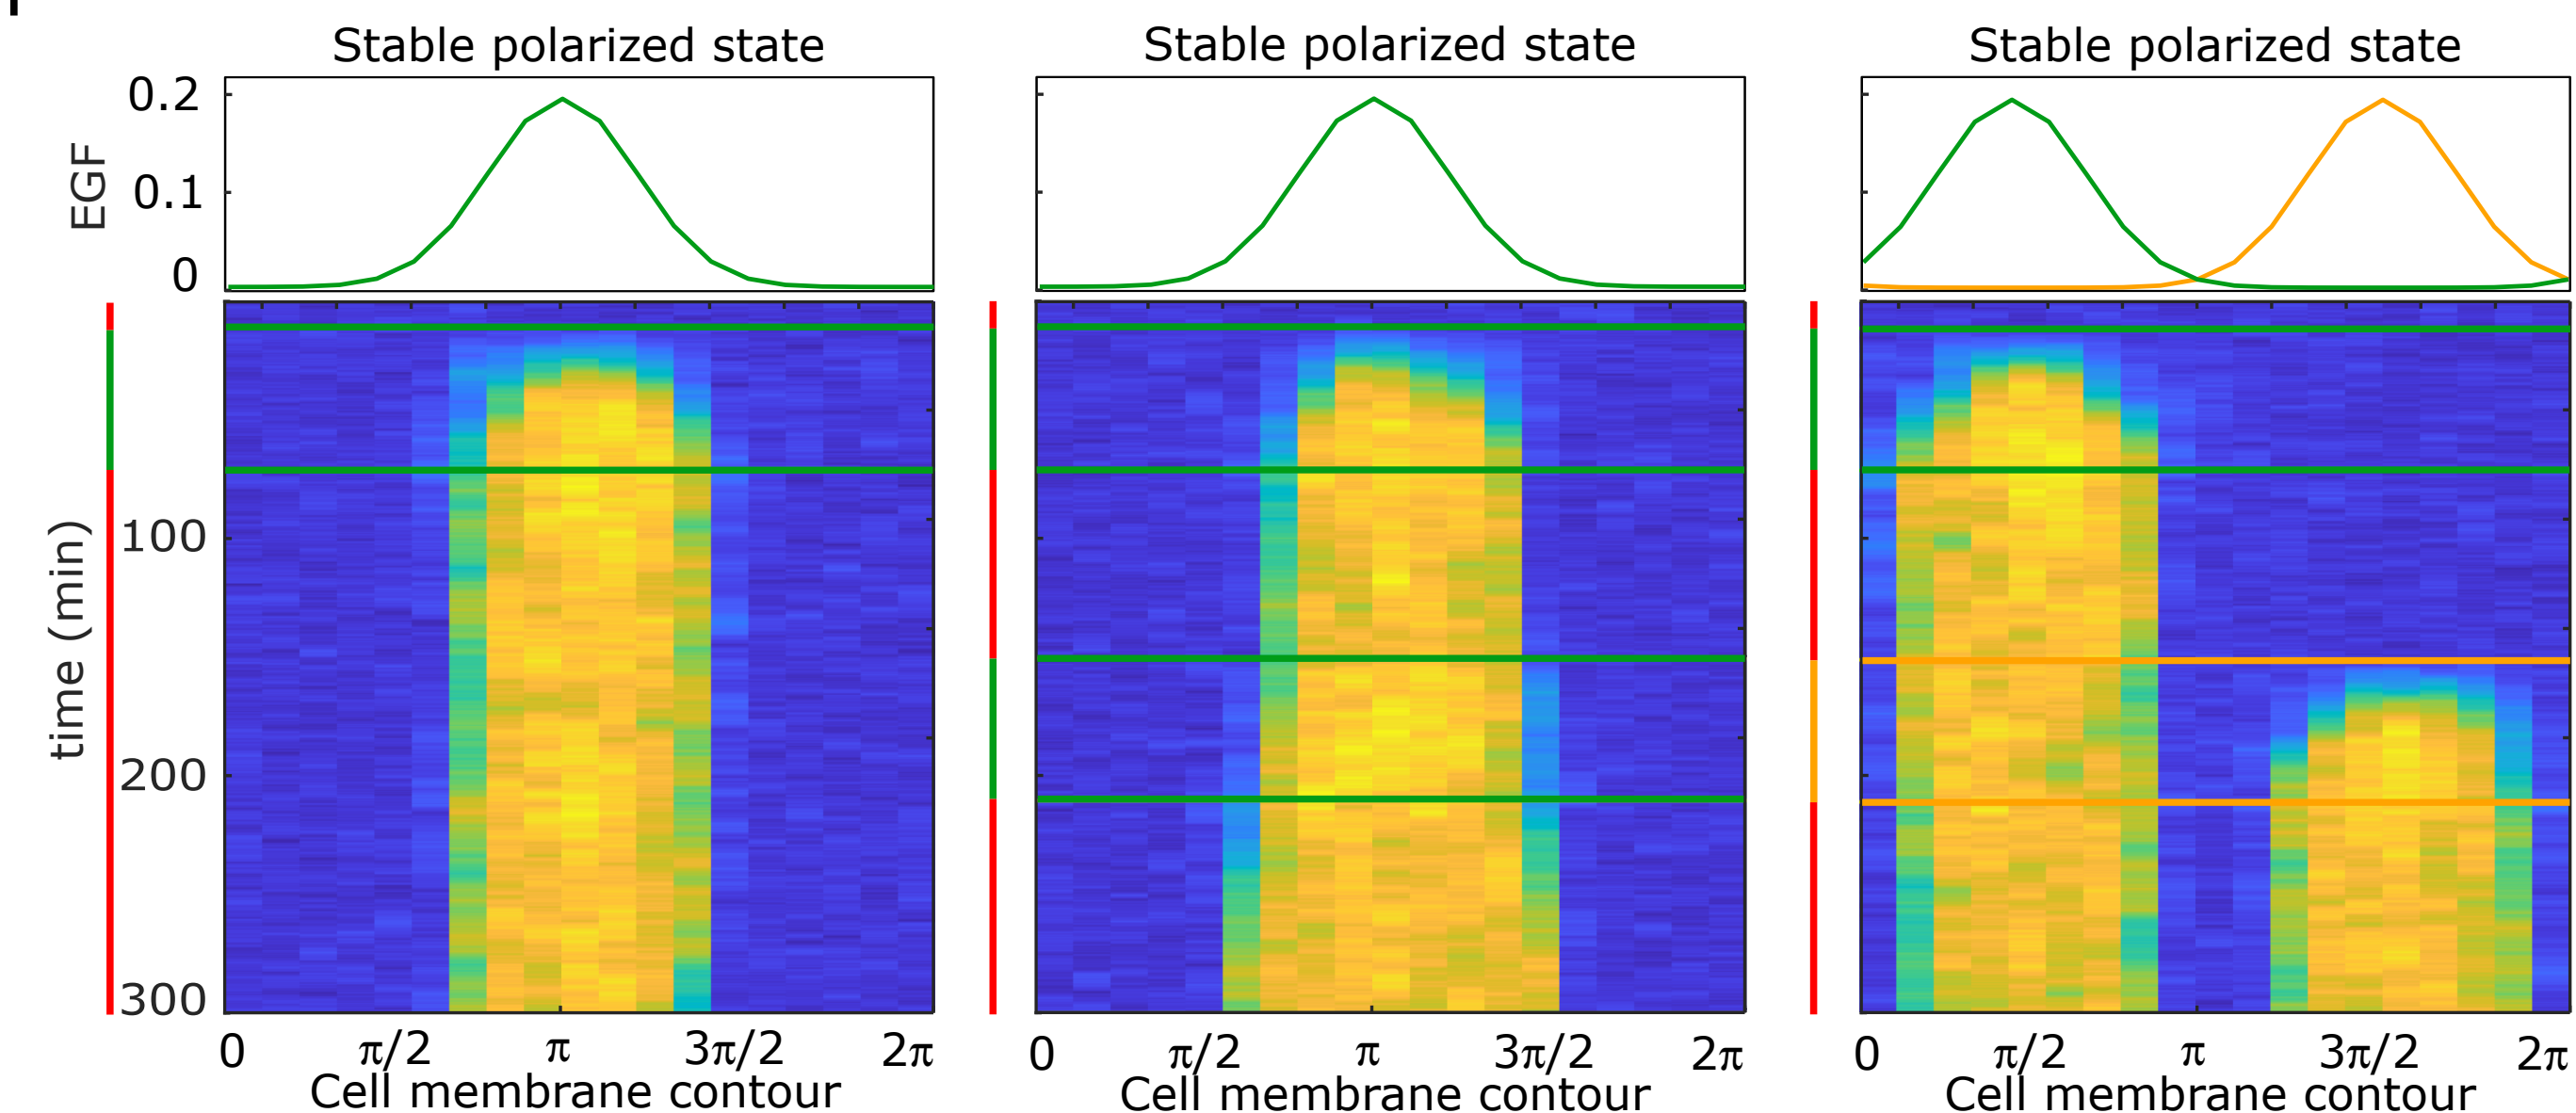

G

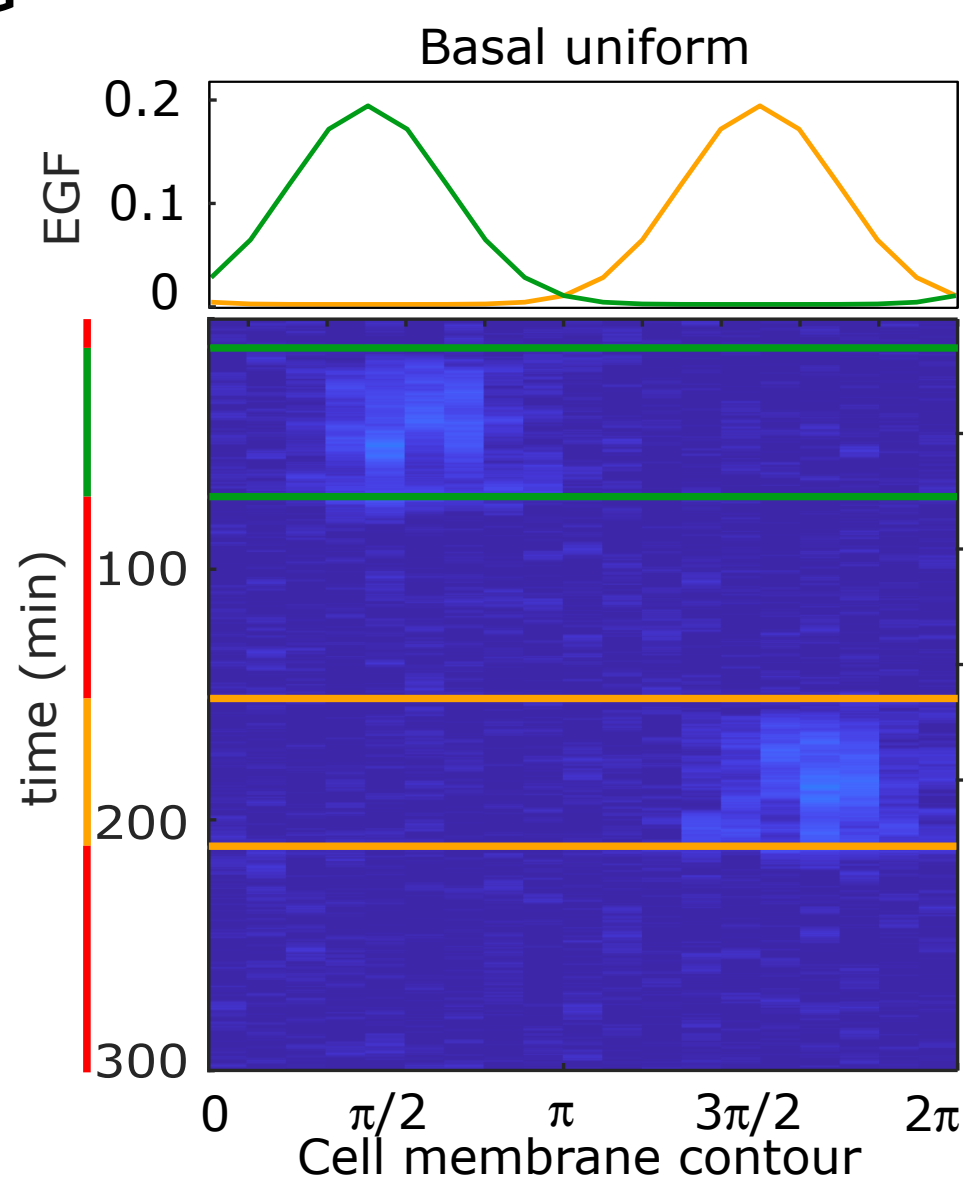

H

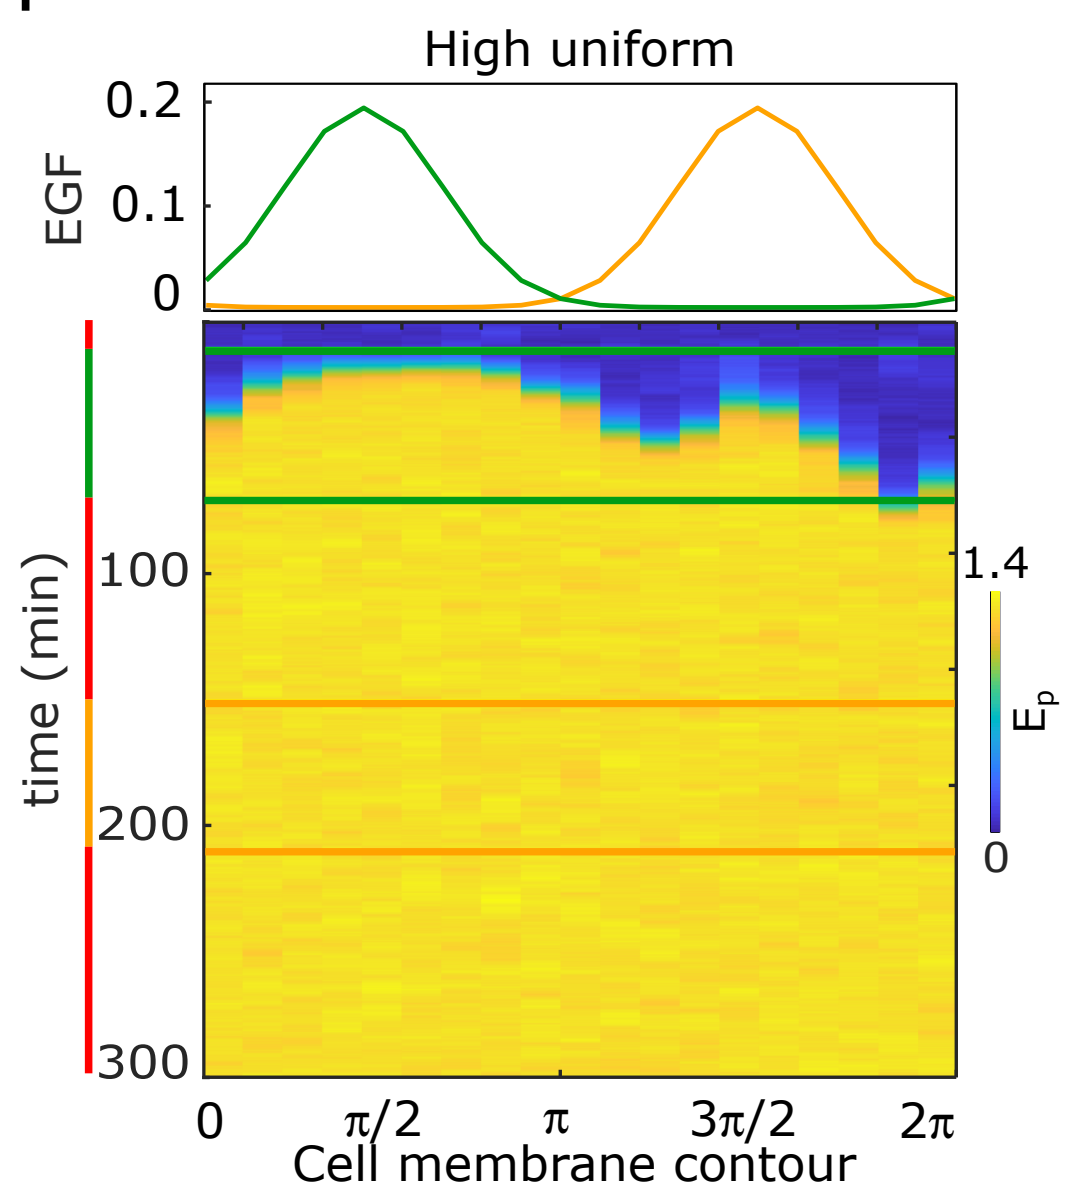

Supplement: supp [file elife-76825-supp-v1.zip]

A

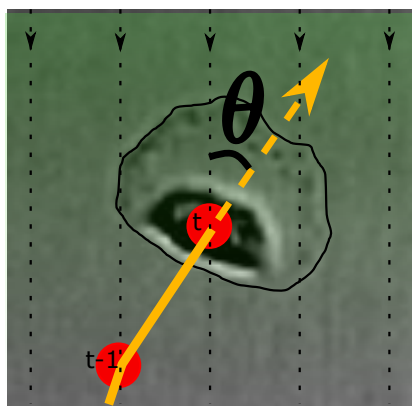

B

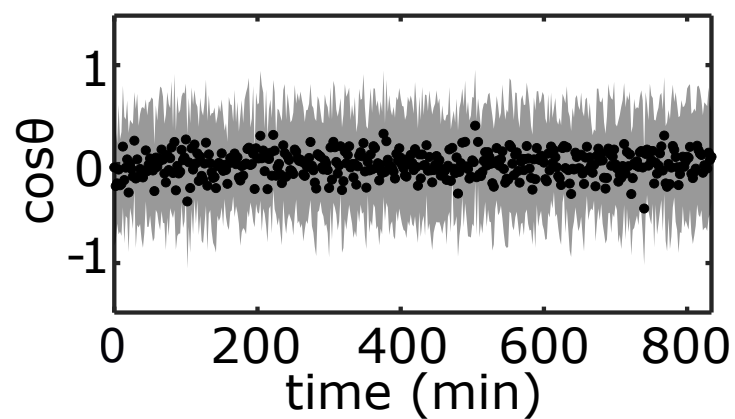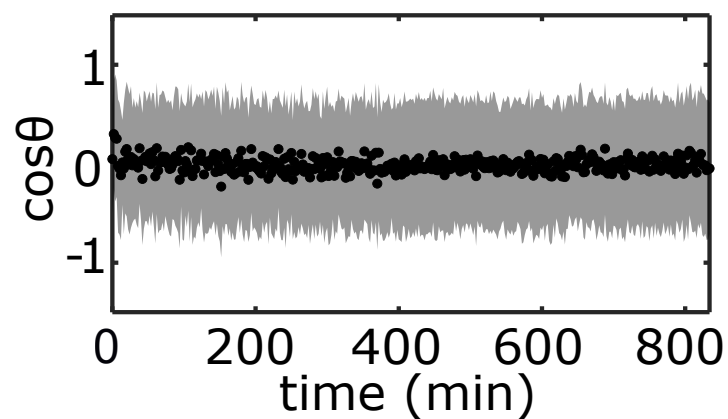

C

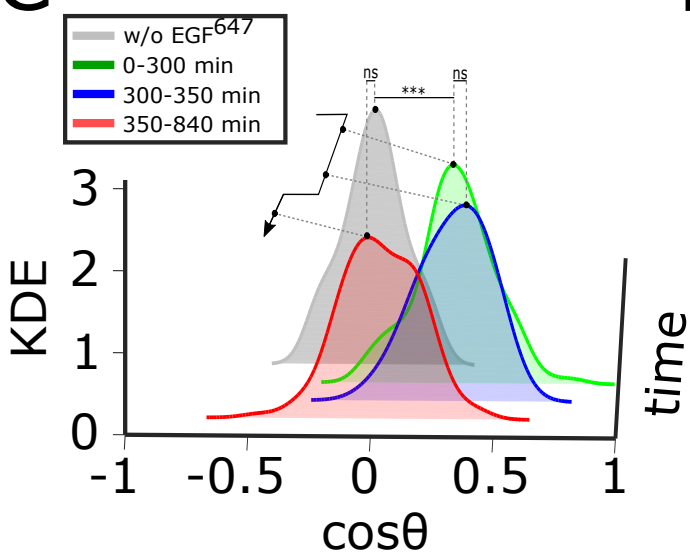

D

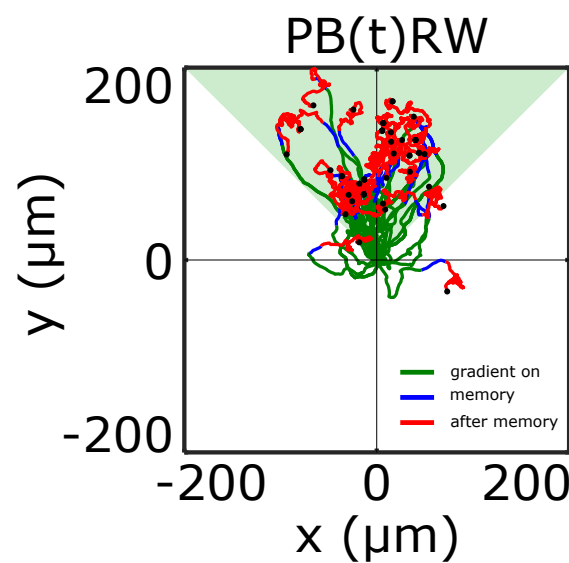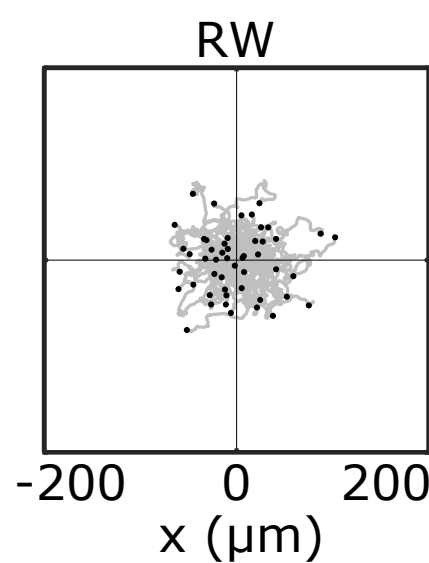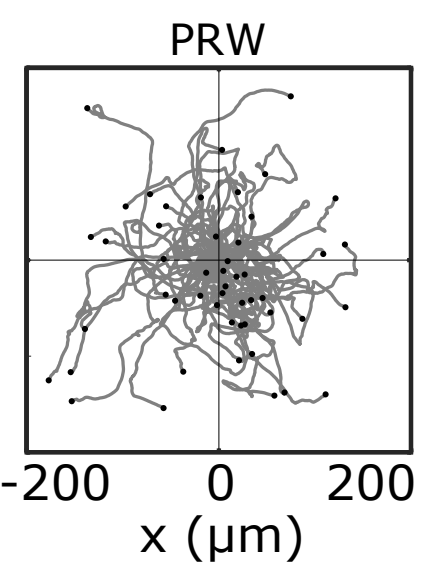

E

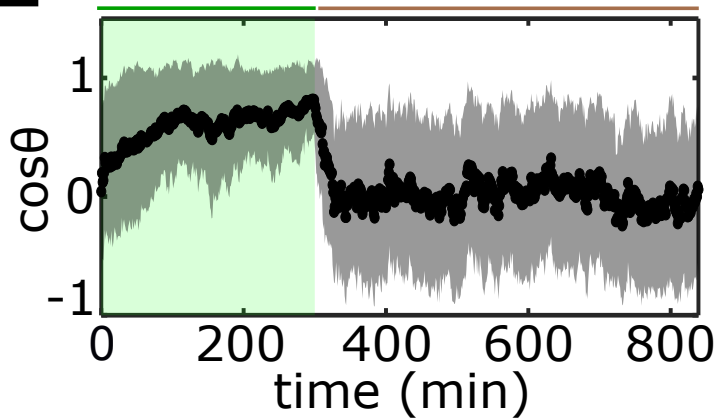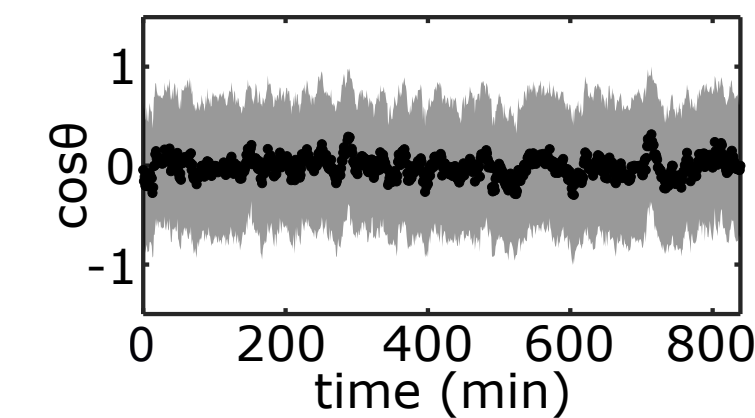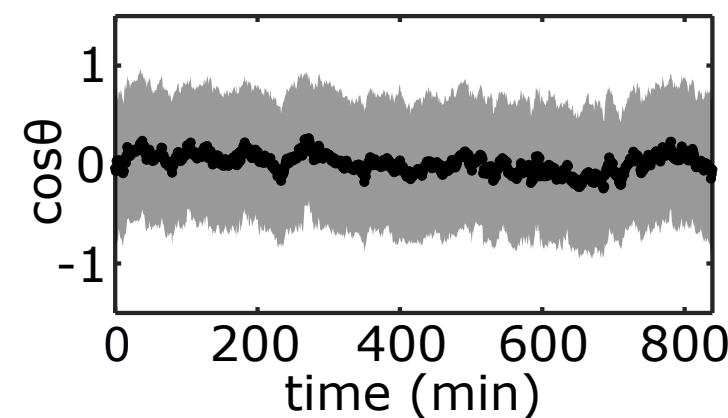

F

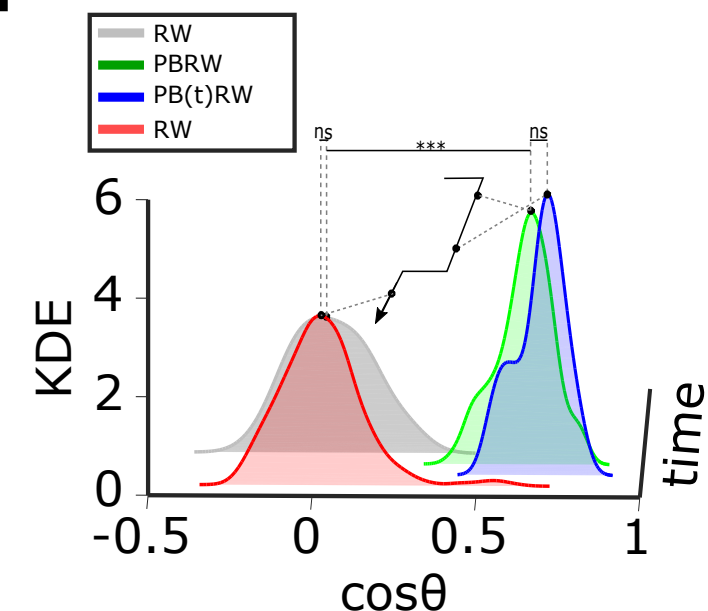

G

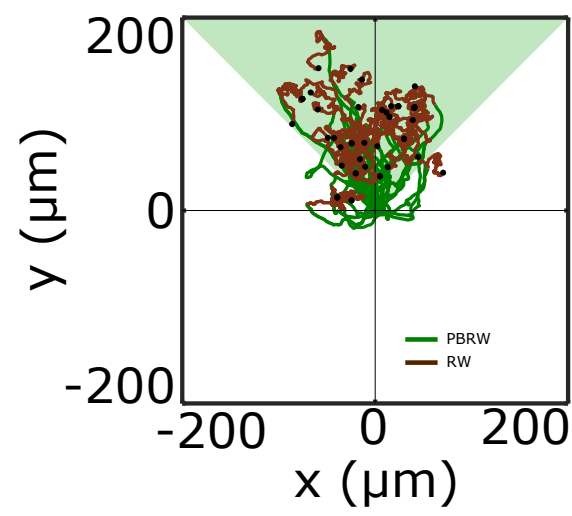

H

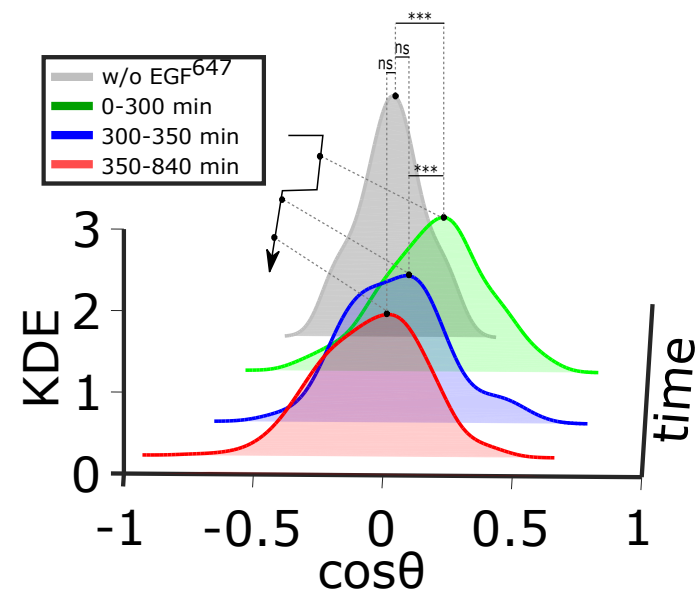

Supplement: supp [file elife-76825-supp-v1.zip]

**A**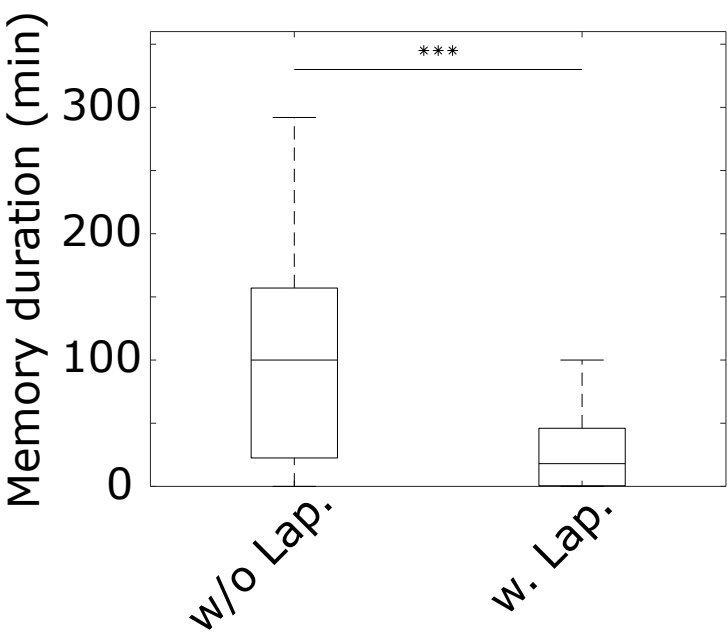**B**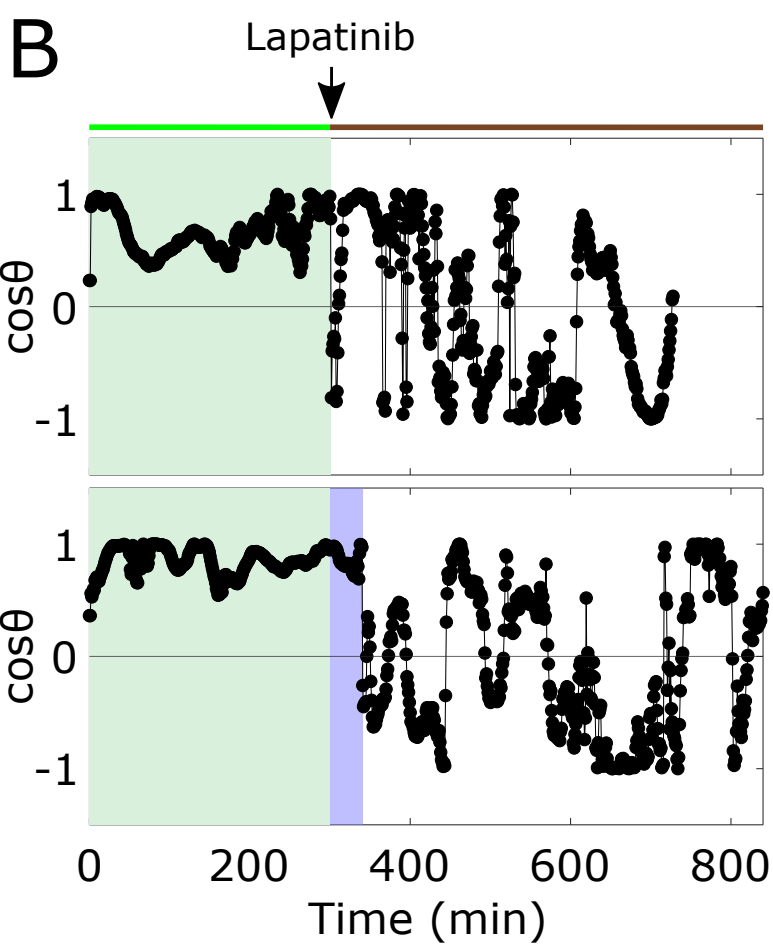**C**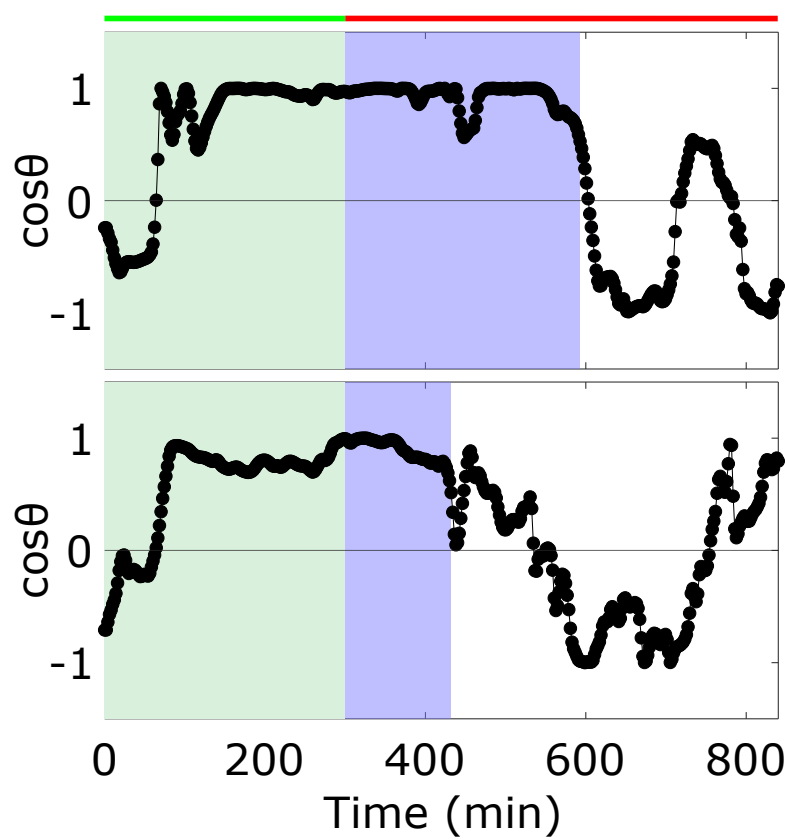**D**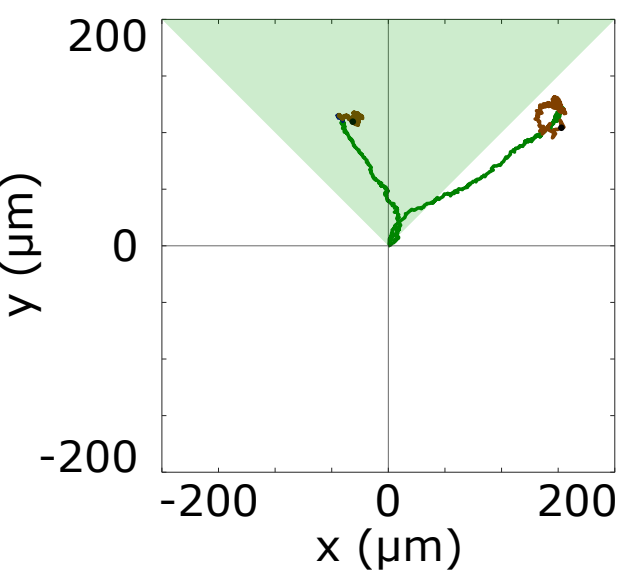**E**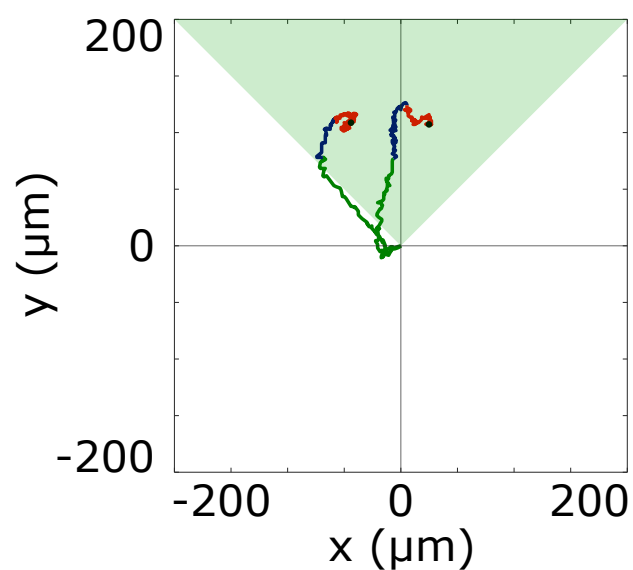

Supplement: supp [file elife-76825-supp-v1.zip]
